# Supplementary material for: Design, synthesis and application of carbazole macrocycles in anion sensors
Source: publisher site journal article supplement (doi:10.3762/bjoc.16.157), 2020-08-04
Supplement: Additional file 1 [file 1860-5397-16-157-S1.pdf]

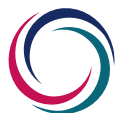

## Supporting Information

for

### Design, synthesis and application of carbazole macrocycles in anion sensors

Alo Rüütel, Ville Yrjänä, Sandip A. Kadam, Indrek Saar, Mihkel Ilisson, Astrid Darnell, Kristjan Haav, Tõiv Haljasorg, Lauri Toom, Johan Bobacka and Ivo Leito

*Beilstein J. Org. Chem.* **2020**, *16*, 1901–1914. doi:10.3762/bjoc.16.157

## Experimental part

## Table of contents

|                                                                                    |     |
|------------------------------------------------------------------------------------|-----|
| General methods                                                                    | S1  |
| Synthesis and characterisation of compounds                                        | S9  |
| References                                                                         | S23 |
| Analytical spectra and pictures of Cosmo-RS conformers                             |     |
| <sup>1</sup> H NMR spectrum (700.1 MHz) of compound <b>CZ016</b>                   | S24 |
| <sup>13</sup> C NMR spectrum (700.1 MHz) of compound <b>CZ016</b>                  | S25 |
| <sup>1</sup> H- <sup>13</sup> C HSQC spectrum (700.1 MHz) of compound <b>CZ016</b> | S26 |
| <sup>1</sup> H- <sup>13</sup> C HMBC spectrum (700.1 MHz) of compound <b>CZ016</b> | S27 |
| HRMS spectrum of compound <b>CZ016</b>                                             | S28 |
| <sup>1</sup> H NMR spectrum (700.1 MHz) of compound <b>MC001</b>                   | S29 |
| <sup>13</sup> C NMR spectrum (700.1 MHz) of compound <b>MC001</b>                  | S30 |
| <sup>1</sup> H- <sup>13</sup> C HSQC spectrum (700.1 MHz) of compound <b>MC001</b> | S31 |
| <sup>1</sup> H- <sup>13</sup> C HMBC spectrum (700.1 MHz) of compound <b>MC001</b> | S32 |
| HRMS spectrum of compound <b>MC001</b>                                             | S33 |
| <sup>1</sup> H NMR spectrum (700.1 MHz) of compound <b>MC002</b>                   | S34 |
| <sup>13</sup> C NMR spectrum (700.1 MHz) of compound <b>MC002</b>                  | S35 |
| <sup>1</sup> H- <sup>13</sup> C HSQC spectrum (700.1 MHz) of compound <b>MC002</b> | S36 |
| <sup>1</sup> H- <sup>13</sup> C HMBC spectrum (700.1 MHz) of compound <b>MC002</b> | S37 |
| HRMS spectrum of compound <b>MC002</b>                                             | S38 |
| <sup>1</sup> H NMR spectrum (700.1 MHz) of compound <b>MC003</b>                   | S39 |
| <sup>13</sup> C NMR spectrum (700.1 MHz) of compound <b>MC003</b>                  | S40 |
| <sup>1</sup> H- <sup>13</sup> C HSQC spectrum (700.1 MHz) of compound <b>MC003</b> | S41 |
| <sup>1</sup> H- <sup>13</sup> C HMBC spectrum (700.1 MHz) of compound <b>MC003</b> | S42 |
| HRMS spectrum of compound <b>MC003</b>                                             | S43 |
| <sup>1</sup> H NMR spectrum (700.1 MHz) of compound <b>MC004</b>                   | S44 |
| <sup>13</sup> C NMR spectrum (700.1 MHz) of compound <b>MC004</b>                  | S45 |
| <sup>1</sup> H- <sup>13</sup> C HSQC spectrum (700.1 MHz) of compound <b>MC004</b> | S46 |
| <sup>1</sup> H- <sup>13</sup> C HMBC spectrum (700.1 MHz) of compound <b>MC004</b> | S47 |
| HRMS spectrum of compound <b>MC004</b>                                             | S48 |
| <sup>1</sup> H NMR spectrum (700.1 MHz) of compound <b>MC005</b>                   | S49 |
| <sup>13</sup> C NMR spectrum (700.1 MHz) of compound <b>MC005</b>                  | S50 |
| <sup>1</sup> H- <sup>13</sup> C HSQC spectrum (700.1 MHz) of compound <b>MC005</b> | S51 |
| <sup>1</sup> H- <sup>13</sup> C HMBC spectrum (700.1 MHz) of compound <b>MC005</b> | S52 |
| HRMS spectrum of compound <b>MC005</b>                                             | S53 |
| <sup>1</sup> H NMR spectrum (700.1 MHz) of compound <b>MC006</b>                   | S54 |
| <sup>13</sup> C NMR spectrum (700.1 MHz) of compound <b>MC006</b>                  | S55 |
| <sup>1</sup> H- <sup>13</sup> C HSQC spectrum (700.1 MHz) of compound <b>MC006</b> | S56 |
| <sup>1</sup> H- <sup>13</sup> C HMBC spectrum (700.1 MHz) of compound <b>MC006</b> | S57 |
| HRMS spectrum of compound <b>MC006</b>                                             | S58 |
| <sup>1</sup> H NMR spectrum (700.1 MHz) of compound <b>MC007</b>                   | S59 |
| <sup>13</sup> C NMR spectrum (700.1 MHz) of compound <b>MC007</b>                  | S60 |
| <sup>1</sup> H- <sup>13</sup> C HSQC spectrum (700.1 MHz) of compound <b>MC007</b> | S61 |
| <sup>1</sup> H- <sup>13</sup> C HMBC spectrum (700.1 MHz) of compound <b>MC007</b> | S62 |
| HRMS spectrum of compound <b>MC007</b>                                             | S63 |



|                                                                                                                                                                  |      |
|------------------------------------------------------------------------------------------------------------------------------------------------------------------|------|
| <sup>1</sup> H NMR spectrum (700.1 MHz) of compound <b>MC008</b>                                                                                                 | S64  |
| <sup>13</sup> C NMR spectrum (700.1 MHz) of compound <b>MC008</b>                                                                                                | S65  |
| <sup>1</sup> H- <sup>13</sup> C HSQC spectrum (700.1 MHz) of compound <b>MC008</b>                                                                               | S66  |
| <sup>1</sup> H- <sup>13</sup> C HMBC spectrum (700.1 MHz) of compound <b>MC008</b>                                                                               | S67  |
| HRMS spectrum of compound <b>MC008</b>                                                                                                                           | S68  |
| <sup>1</sup> H NMR spectrum (700.1 MHz) of compound <b>MC009</b>                                                                                                 | S69  |
| <sup>13</sup> C NMR spectrum (700.1 MHz) of compound <b>MC009</b>                                                                                                | S70  |
| <sup>1</sup> H- <sup>13</sup> C HSQC spectrum (700.1 MHz) of compound <b>MC009</b>                                                                               | S71  |
| <sup>1</sup> H- <sup>13</sup> C HMBC spectrum (700.1 MHz) of compound <b>MC009</b>                                                                               | S72  |
| HRMS spectrum of compound <b>MC009</b>                                                                                                                           | S73  |
| <sup>1</sup> H NMR spectrum (700.1 MHz) of compound <b>MC010</b>                                                                                                 | S74  |
| <sup>13</sup> C NMR spectrum (700.1 MHz) of compound <b>MC010</b>                                                                                                | S75  |
| <sup>1</sup> H- <sup>13</sup> C HSQC spectrum (700.1 MHz) of compound <b>MC010</b>                                                                               | S76  |
| <sup>1</sup> H- <sup>13</sup> C HMBC spectrum (700.1 MHz) of compound <b>MC010</b>                                                                               | S77  |
| HRMS spectrum of compound <b>MC010</b>                                                                                                                           | S78  |
| <sup>1</sup> H NMR spectrum (700.1 MHz) of compound <b>MC011</b>                                                                                                 | S79  |
| <sup>13</sup> C NMR spectrum (700.1 MHz) of compound <b>MC011</b>                                                                                                | S80  |
| <sup>1</sup> H- <sup>13</sup> C HSQC spectrum (700.1 MHz) of compound <b>MC011</b>                                                                               | S81  |
| <sup>1</sup> H- <sup>13</sup> C HMBC spectrum (700.1 MHz) of compound <b>MC011</b>                                                                               | S82  |
| HRMS spectrum of compound <b>MC011</b>                                                                                                                           | S83  |
| <sup>1</sup> H NMR spectrum (700.1 MHz) of compound <b>MC012</b>                                                                                                 | S84  |
| <sup>13</sup> C NMR spectrum (700.1 MHz) of compound <b>MC012</b>                                                                                                | S85  |
| <sup>1</sup> H- <sup>13</sup> C HSQC spectrum (700.1 MHz) of compound <b>MC012</b>                                                                               | S86  |
| <sup>1</sup> H- <sup>13</sup> C HMBC spectrum (700.1 MHz) of compound <b>MC012</b>                                                                               | S87  |
| HRMS spectrum of compound <b>MC012</b>                                                                                                                           | S88  |
| <sup>1</sup> H NMR spectrum (700.1 MHz) of compound <b>MC013</b>                                                                                                 | S89  |
| <sup>13</sup> C NMR spectrum (700.1 MHz) of compound <b>MC013</b>                                                                                                | S90  |
| <sup>1</sup> H- <sup>13</sup> C HSQC spectrum (700.1 MHz) of compound <b>MC013</b>                                                                               | S91  |
| <sup>1</sup> H- <sup>13</sup> C HMBC spectrum (700.1 MHz) of compound <b>MC013</b>                                                                               | S92  |
| HRMS spectrum of compound <b>MC013</b>                                                                                                                           | S93  |
| <sup>1</sup> H NMR spectrum (700.1 MHz) of compound <b>MC014</b>                                                                                                 | S94  |
| <sup>13</sup> C NMR spectrum (700.1 MHz) of compound <b>MC014</b>                                                                                                | S95  |
| <sup>1</sup> H- <sup>13</sup> C HSQC spectrum (700.1 MHz) of compound <b>MC014</b>                                                                               | S96  |
| <sup>1</sup> H- <sup>13</sup> C HMBC spectrum (700.1 MHz) of compound <b>MC014</b>                                                                               | S97  |
| HRMS spectrum of compound <b>MC014</b>                                                                                                                           | S98  |
| Relative binding affinity measurements                                                                                                                           |      |
| Stacked <sup>1</sup> H NMR spectra (700.1 MHz) of a mixture of receptors <b>CZ016</b> ; 1,3-diindolylurea; 1,3-dicarbazolylurea + TBA-acetate                    | S99  |
| Stacked <sup>1</sup> H NMR spectra (700.1 MHz) of a mixture of receptors <b>MC001</b> ; 2,7-(COOBu)2-indolocarbazole; 2,9-(COOBu)2-indolocarbazole + TBA-acetate | S100 |
| Stacked <sup>1</sup> H NMR spectra (700.1 MHz) of a mixture of receptors <b>MC002</b> ; indolocarbazole; 2,7-(Cl)2-indolocarbazole + TBA-acetate                 | S101 |
| Stacked <sup>1</sup> H NMR spectra (700.1 MHz) of a mixture of receptors <b>MC003</b> ; 2,7-(COOBu)2-indolocarbazole; 2,9-(COOBu)2-indolocarbazole + TBA-acetate | S102 |
| Stacked <sup>1</sup> H NMR spectra (700.1 MHz) of a mixture of receptors <b>MC004</b> ; 1,3-diindolylurea; 1,3-dicarbazolylurea + TBA-acetate                    | S103 |

|                                                                                                                                                                                                            |      |
|------------------------------------------------------------------------------------------------------------------------------------------------------------------------------------------------------------|------|
| Stacked <sup>1</sup> H NMR spectra (700.1 MHz) of a mixture of receptors <b>MC005</b> ; 1,3-diindolylurea; 1,3-dicarbazolylurea + TBA-acetate                                                              | S104 |
| Stacked <sup>1</sup> H NMR spectra (700.1 MHz) of a mixture of receptors <b>MC006</b> ; 1,3-diindolylurea; 1,3-dicarbazolylurea + TBA-acetate                                                              | S105 |
| Stacked <sup>1</sup> H NMR spectra (700.1 MHz) of a mixture of receptors <b>MC007</b> ; 1,3-diindolylurea; 1,3-dicarbazolylurea + TBA-acetate                                                              | S106 |
| Stacked <sup>1</sup> H NMR spectra (700.1 MHz) of a mixture of receptors <b>MC008</b> ; 1,3-diindolylurea; 1,3-dicarbazolylurea + TBA-acetate                                                              | S107 |
| Stacked <sup>1</sup> H NMR spectra (700.1 MHz) of a mixture of receptors <b>MC009</b> ; <b>MC008</b> ; 1,3-diindolylurea + TBA-acetate                                                                     | S108 |
| Stacked <sup>1</sup> H NMR spectra (700.1 MHz) of a mixture of receptors <b>MC010</b> ; 1,3-diindolylurea; 1,3-dicarbazolylurea + TBA-acetate                                                              | S109 |
| Stacked <sup>1</sup> H NMR spectra (700.1 MHz) of a mixture of receptors <b>MC011</b> ; 1,3-diindolylurea; 1,3-dicarbazolylurea + TBA-acetate                                                              | S110 |
| Stacked <sup>1</sup> H NMR spectra (700.1 MHz) of a mixture of receptors <b>MC012</b> ; 1,3-diindolylurea; 1,3-dicarbazolylurea + TBA-acetate                                                              | S111 |
| Stacked <sup>1</sup> H NMR spectra (700.1 MHz) of a mixture of receptors <b>MC013</b> ; 1,3-diindolylurea; 1,3-dicarbazolylurea + TBA-acetate                                                              | S112 |
| Stacked <sup>1</sup> H NMR spectra (700.1 MHz) of a mixture of receptors <b>MC014</b> ; 1,3-diindolylurea; 1,3-dicarbazolylurea + TBA-acetate                                                              | S113 |
| Stacked <sup>1</sup> H NMR spectra (700.1 MHz) of a mixture of receptors <b>CZ016</b> ; <b>MC002</b> ; 2,7-(COOBu) <sub>2</sub> -indolocarbazole; 2,9-(COOBu) <sub>2</sub> -indolocarbazole + TBA-benzoate | S114 |
| Stacked <sup>1</sup> H NMR spectra (700.1 MHz) of a mixture of receptors <b>MC001</b> ; 2,7-(COOBu) <sub>2</sub> -indolocarbazole; 2,9-(COOBu) <sub>2</sub> -indolocarbazole + TBA-benzoate                | S115 |
| Stacked <sup>1</sup> H NMR spectra (700.1 MHz) of a mixture of receptors <b>MC003</b> ; 1,3-diindolylurea; 1,3-dicarbazolylurea + TBA-benzoate                                                             | S116 |
| Stacked <sup>1</sup> H NMR spectra (700.1 MHz) of a mixture of receptors <b>MC004</b> ; 1,3-diindolylurea; 1,3-dicarbazolylurea + TBA-benzoate                                                             | S117 |
| Stacked <sup>1</sup> H NMR spectra (700.1 MHz) of a mixture of receptors <b>MC005</b> ; 1,3-diindolylurea; 1,3-dicarbazolylurea + TBA-benzoate                                                             | S118 |
| Stacked <sup>1</sup> H NMR spectra (700.1 MHz) of a mixture of receptors <b>MC006</b> ; 1,3-diindolylurea; 1,3-dicarbazolylurea + TBA-benzoate                                                             | S119 |
| Stacked <sup>1</sup> H NMR spectra (700.1 MHz) of a mixture of receptors <b>MC007</b> ; 1,3-diindolylurea; 1,3-dicarbazolylurea + TBA-benzoate                                                             | S120 |
| Stacked <sup>1</sup> H NMR spectra (700.1 MHz) of a mixture of receptors <b>MC008</b> ; 1,3-diindolylurea; 1,3-dicarbazolylurea + TBA-benzoate                                                             | S121 |
| Stacked <sup>1</sup> H NMR spectra (700.1 MHz) of a mixture of receptors <b>MC009</b> ; 1,3-diindolylurea; 1,3-dicarbazolylurea + TBA-benzoate                                                             | S122 |
| Stacked <sup>1</sup> H NMR spectra (700.1 MHz) of a mixture of receptors <b>MC010</b> ; 1,3-diindolylurea; 1,3-dicarbazolylurea + TBA-benzoate                                                             | S123 |
| Stacked <sup>1</sup> H NMR spectra (700.1 MHz) of a mixture of receptors <b>MC011</b> ; 1,3-diindolylurea; 1,3-dicarbazolylurea + TBA-benzoate                                                             | S124 |
| Stacked <sup>1</sup> H NMR spectra (700.1 MHz) of a mixture of receptors <b>MC012</b> ; 1,3-diindolylurea; 1,3-dicarbazolylurea + TBA-benzoate                                                             | S125 |
| Stacked <sup>1</sup> H NMR spectra (700.1 MHz) of a mixture of receptors <b>MC013</b> ; 1,3-diindolylurea; 1,3-dicarbazolylurea + TBA-benzoate                                                             | S126 |
| Stacked <sup>1</sup> H NMR spectra (700.1 MHz) of a mixture of receptors <b>MC014</b> ; 1,3-diindolylurea; 1,3-dicarbazolylurea + TBA-benzoate                                                             | S127 |
| Stacked <sup>1</sup> H NMR spectra (700.1 MHz) of a mixture of receptors <b>CZ016</b> ; 2,7-(COOBu) <sub>2</sub> -indolocarbazole; 2,9-(COOBu) <sub>2</sub> -indolocarbazole + TBA-formate                 | S128 |
| Stacked <sup>1</sup> H NMR spectra (700.1 MHz) of a mixture of receptors <b>MC001</b> ; <b>MC004</b> ; 1,3-diindolylurea + TBA-formate                                                                     | S129 |

|                                                                                                                                                                  |      |
|------------------------------------------------------------------------------------------------------------------------------------------------------------------|------|
| Stacked <sup>1</sup> H NMR spectra (700.1 MHz) of a mixture of receptors <b>MC002</b> ; 1,3-diindolylurea; 1,3-dicarbazolylurea + TBA-formate                    | S130 |
| Stacked <sup>1</sup> H NMR spectra (700.1 MHz) of a mixture of receptors <b>MC003</b> ; 1,3-diindolylurea; 1,3-dicarbazolylurea + TBA-formate                    | S131 |
| Stacked <sup>1</sup> H NMR spectra (700.1 MHz) of a mixture of receptors <b>MC005</b> ; 1,3-diindolylurea; 1,3-dicarbazolylurea + TBA-formate                    | S132 |
| Stacked <sup>1</sup> H NMR spectra (700.1 MHz) of a mixture of receptors <b>MC006</b> ; <b>MC008</b> ; 1,3-diindolylurea; 1,3-dicarbazolylurea + TBA-formate     | S133 |
| Stacked <sup>1</sup> H NMR spectra (700.1 MHz) of a mixture of receptors <b>MC007</b> ; 1,3-diindolylurea; 1,3-dicarbazolylurea + TBA-formate                    | S134 |
| Stacked <sup>1</sup> H NMR spectra (700.1 MHz) of a mixture of receptors <b>MC008</b> ; <b>MC009</b> ; 1,3-diindolylurea; 1,3-dicarbazolylurea + TBA-formate     | S135 |
| Stacked <sup>1</sup> H NMR spectra (700.1 MHz) of a mixture of receptors <b>MC010</b> ; 1,3-diindolylurea; 1,3-dicarbazolylurea + TBA-formate                    | S136 |
| Stacked <sup>1</sup> H NMR spectra (700.1 MHz) of a mixture of receptors <b>MC011</b> ; 1,3-diindolylurea; 1,3-dicarbazolylurea + TBA-formate                    | S137 |
| Stacked <sup>1</sup> H NMR spectra (700.1 MHz) of a mixture of receptors <b>MC012</b> ; 1,3-diindolylurea; 1,3-dicarbazolylurea + TBA-formate                    | S138 |
| Stacked <sup>1</sup> H NMR spectra (700.1 MHz) of a mixture of receptors <b>MC013</b> ; 1,3-diindolylurea; 1,3-dicarbazolylurea + TBA-formate                    | S139 |
| Stacked <sup>1</sup> H NMR spectra (700.1 MHz) of a mixture of receptors <b>MC014</b> ; 1,3-diindolylurea; 1,3-dicarbazolylurea + TBA-formate                    | S140 |
| Stacked <sup>1</sup> H NMR spectra (700.1 MHz) of a mixture of receptors <b>CZ016</b> ; 1,3-diindolylurea; 1,3-dicarbazolylurea + TBA-lactate                    | S141 |
| Stacked <sup>1</sup> H NMR spectra (700.1 MHz) of a mixture of receptors <b>MC001</b> ; 2,7-(COOBu)2-indolocarbazole; 2,9-(COOBu)2-indolocarbazole + TBA-lactate | S142 |
| Stacked <sup>1</sup> H NMR spectra (700.1 MHz) of a mixture of receptors <b>MC003</b> ; 1,3-diindolylurea; 1,3-dicarbazolylurea + TBA-lactate                    | S143 |
| Stacked <sup>1</sup> H NMR spectra (700.1 MHz) of a mixture of receptors <b>MC004</b> ; 1,3-diindolylurea; 1,3-dicarbazolylurea + TBA-lactate                    | S144 |
| Stacked <sup>1</sup> H NMR spectra (700.1 MHz) of a mixture of receptors <b>MC005</b> ; 1,3-diindolylurea; 1,3-dicarbazolylurea + TBA-lactate                    | S145 |
| Stacked <sup>1</sup> H NMR spectra (700.1 MHz) of a mixture of receptors <b>MC006</b> ; 1,3-diindolylurea; 1,3-dicarbazolylurea + TBA-lactate                    | S146 |
| Stacked <sup>1</sup> H NMR spectra (700.1 MHz) of a mixture of receptors <b>MC007</b> ; 1,3-diindolylurea; 1,3-dicarbazolylurea + TBA-lactate                    | S147 |
| Stacked <sup>1</sup> H NMR spectra (700.1 MHz) of a mixture of receptors <b>MC008</b> ; 1,3-diindolylurea; 1,3-dicarbazolylurea + TBA-lactate                    | S148 |
| Stacked <sup>1</sup> H NMR spectra (700.1 MHz) of a mixture of receptors <b>MC009</b> ; 1,3-diindolylurea; 1,3-dicarbazolylurea + TBA-lactate                    | S149 |
| Stacked <sup>1</sup> H NMR spectra (700.1 MHz) of a mixture of receptors <b>MC010</b> ; 1,3-diindolylurea; 1,3-dicarbazolylurea + TBA-lactate                    | S150 |
| Stacked <sup>1</sup> H NMR spectra (700.1 MHz) of a mixture of receptors <b>MC011</b> ; 1,3-diindolylurea; 1,3-dicarbazolylurea + TBA-lactate                    | S151 |
| Stacked <sup>1</sup> H NMR spectra (700.1 MHz) of a mixture of receptors <b>MC012</b> ; 1,3-diindolylurea; 1,3-dicarbazolylurea + TBA-lactate                    | S152 |
| Stacked <sup>1</sup> H NMR spectra (700.1 MHz) of a mixture of receptors <b>MC013</b> ; 1,3-diindolylurea; 1,3-dicarbazolylurea + TBA-lactate                    | S153 |
| Stacked <sup>1</sup> H NMR spectra (700.1 MHz) of a mixture of receptors <b>MC014</b> ; 1,3-diindolylurea; 1,3-dicarbazolylurea + TBA-lactate                    | S154 |
| Stacked <sup>1</sup> H NMR spectra (700.1 MHz) of a mixture of receptors <b>CZ016</b> ; 1,3-diindolylurea; 1,3-dicarbazolylurea + TBA-pivalate                   | S155 |

|                                                                                                                                                                                                        |      |
|--------------------------------------------------------------------------------------------------------------------------------------------------------------------------------------------------------|------|
| Stacked <sup>1</sup> H NMR spectra (700.1 MHz) of a mixture of receptors <b>MC001</b> ; 2,7-(COOBu)2-indolocarbazole; 2,9-(COOBu)2-indolocarbazole + TBA-pivalate                                      | S156 |
| Stacked <sup>1</sup> H NMR spectra (700.1 MHz) of a mixture of receptors <b>MC003</b> ; 1,3-diindolylurea; 1,3-dicarbazolylurea + TBA-pivalate                                                         | S157 |
| Stacked <sup>1</sup> H NMR spectra (700.1 MHz) of a mixture of receptors <b>MC004</b> ; 3,4,4-Cl <sub>3</sub> -diphenylurea; 2,7-(COOBu)2-indolocarbazole; 2,9-(COOBu)2-indolocarbazole + TBA-pivalate | S158 |
| Stacked <sup>1</sup> H NMR spectra (700.1 MHz) of a mixture of receptors <b>MC005</b> ; 1,3-diindolylurea; 1,3-dicarbazolylurea + TBA-pivalate                                                         | S159 |
| Stacked <sup>1</sup> H NMR spectra (700.1 MHz) of a mixture of receptors <b>MC006</b> ; 2,7-(COOBu)2-indolocarbazole; 2,9-(COOBu)2-indolocarbazole + TBA-pivalate                                      | S160 |
| Stacked <sup>1</sup> H NMR spectra (700.1 MHz) of a mixture of receptors <b>MC007</b> ; 1,3-diindolylurea; 1,3-dicarbazolylurea + TBA-pivalate                                                         | S161 |
| Stacked <sup>1</sup> H NMR spectra (700.1 MHz) of a mixture of receptors <b>MC008</b> ; 1,3-diindolylurea; 1,3-dicarbazolylurea + TBA-pivalate                                                         | S162 |
| Stacked <sup>1</sup> H NMR spectra (700.1 MHz) of a mixture of receptors <b>MC009</b> ; 1,3-diindolylurea; 1,3-dicarbazolylurea + TBA-pivalate                                                         | S163 |
| Stacked <sup>1</sup> H NMR spectra (700.1 MHz) of a mixture of receptors <b>MC010</b> ; 1,3-diindolylurea; 1,3-dicarbazolylurea + TBA-pivalate                                                         | S164 |
| Stacked <sup>1</sup> H NMR spectra (700.1 MHz) of a mixture of receptors <b>MC011</b> ; 1,3-diindolylurea; 1,3-dicarbazolylurea + TBA-pivalate                                                         | S165 |
| Stacked <sup>1</sup> H NMR spectra (700.1 MHz) of a mixture of receptors <b>MC012</b> ; 1,3-diindolylurea; 1,3-dicarbazolylurea + TBA-pivalate                                                         | S166 |
| Stacked <sup>1</sup> H NMR spectra (700.1 MHz) of a mixture of receptors <b>MC013</b> ; 1,3-diindolylurea; 1,3-dicarbazolylurea + TBA-pivalate                                                         | S167 |
| Stacked <sup>1</sup> H NMR spectra (700.1 MHz) of a mixture of receptors <b>MC014</b> ; 1,3-diindolylurea; 1,3-dicarbazolylurea + TBA-pivalate                                                         | S168 |
| UV-vis spectra of absolute binding affinity measurement for <b>MC002</b> with TBA-lactate in 99.5%:0.5% m/m DMSO-H <sub>2</sub> O                                                                      | S169 |
| UV-vis spectra of absolute binding affinity measurement for <b>MC002</b> with TBA-pivalate 99.5%:0.5% m/m DMSO-H <sub>2</sub> O                                                                        | S169 |
| UV-vis spectra of absolute binding affinity measurement for <b>MC004</b> with TBA-acetate 90.0%:10.0% m/m DMSO-H <sub>2</sub> O                                                                        | S170 |
| UV-vis spectra of absolute binding affinity measurement for <b>MC005</b> with TBA-acetate 90.0%:10.0% m/m DMSO-H <sub>2</sub> O                                                                        | S170 |
| UV-vis spectra of absolute binding affinity measurement for <b>MC007</b> with TBA-acetate 90.0%:10.0% m/m DMSO-H <sub>2</sub> O                                                                        | S171 |
| UV-vis spectra of absolute binding affinity measurement for <b>MC008</b> with TBA-acetate 90.0%:10.0% m/m DMSO-H <sub>2</sub> O                                                                        | S171 |
| UV-vis spectra of absolute binding affinity measurement for <b>MC009</b> with TBA-acetate 90.0%:10.0% m/m DMSO-H <sub>2</sub> O                                                                        | S172 |
| UV-vis spectra of absolute binding affinity measurement for <b>MC004</b> with TBA-benzoate 90.0%:10.0% m/m DMSO-H <sub>2</sub> O                                                                       | S172 |
| UV-vis spectra of absolute binding affinity measurement for <b>MC005</b> with TBA-benzoate 90.0%:10.0% m/m DMSO-H <sub>2</sub> O                                                                       | S173 |
| UV-vis spectra of absolute binding affinity measurement for <b>MC007</b> with TBA-benzoate 90.0%:10.0% m/m DMSO-H <sub>2</sub> O                                                                       | S173 |
| UV-vis spectra of absolute binding affinity measurement for <b>MC008</b> with TBA-benzoate 90.0%:10.0% m/m DMSO-H <sub>2</sub> O                                                                       | S174 |
| UV-vis spectra of absolute binding affinity measurement for <b>MC009</b> with TBA-benzoate 90.0%:10.0% m/m DMSO-H <sub>2</sub> O                                                                       | S174 |
| UV-vis spectra of absolute binding affinity measurement for <b>MC004</b> with TBA-formate 90.0%:10.0% m/m DMSO-H <sub>2</sub> O                                                                        | S175 |

|                                                                                                                                     |      |
|-------------------------------------------------------------------------------------------------------------------------------------|------|
| UV-vis spectra of absolute binding affinity measurement for <b>MC005</b> with TBA-formate<br>90.0%:10.0% m/m DMSO-H <sub>2</sub> O  | S175 |
| UV-vis spectra of absolute binding affinity measurement for <b>MC007</b> with TBA-formate<br>90.0%:10.0% m/m DMSO-H <sub>2</sub> O  | S176 |
| UV-vis spectra of absolute binding affinity measurement for <b>MC008</b> with TBA-formate<br>90.0%:10.0% m/m DMSO-H <sub>2</sub> O  | S176 |
| UV-vis spectra of absolute binding affinity measurement for <b>MC009</b> with TBA-formate<br>90.0%:10.0% m/m DMSO-H <sub>2</sub> O  | S177 |
| UV-vis spectra of absolute binding affinity measurement for <b>MC004</b> with TBA-lactate<br>90.0%:10.0% m/m DMSO-H <sub>2</sub> O  | S177 |
| UV-vis spectra of absolute binding affinity measurement for <b>MC005</b> with TBA-lactate<br>90.0%:10.0% m/m DMSO-H <sub>2</sub> O  | S178 |
| UV-vis spectra of absolute binding affinity measurement for <b>MC007</b> with TBA-lactate<br>90.0%:10.0% m/m DMSO-H <sub>2</sub> O  | S178 |
| UV-vis spectra of absolute binding affinity measurement for <b>MC008</b> with TBA-lactate<br>90.0%:10.0% m/m DMSO-H <sub>2</sub> O  | S179 |
| UV-vis spectra of absolute binding affinity measurement for <b>MC009</b> with TBA-lactate<br>90.0%:10.0% m/m DMSO-H <sub>2</sub> O  | S179 |
| UV-vis spectra of absolute binding affinity measurement for <b>MC004</b> with TBA-pivalate<br>90.0%:10.0% m/m DMSO-H <sub>2</sub> O | S180 |
| UV-vis spectra of absolute binding affinity measurement for <b>MC005</b> with TBA-pivalate<br>90.0%:10.0% m/m DMSO-H <sub>2</sub> O | S180 |
| UV-vis spectra of absolute binding affinity measurement for <b>MC007</b> with TBA-pivalate<br>90.0%:10.0% m/m DMSO-H <sub>2</sub> O | S181 |
| UV-vis spectra of absolute binding affinity measurement for <b>MC008</b> with TBA-pivalate<br>90.0%:10.0% m/m DMSO-H <sub>2</sub> O | S181 |
| UV-vis spectra of absolute binding affinity measurement for <b>MC009</b> with TBA-pivalate<br>90.0%:10.0% m/m DMSO-H <sub>2</sub> O | S182 |
| Cosmo-RS geometry pictures                                                                                                          |      |
| Lowest energy conformation of receptor <b>CZ016</b>                                                                                 | S183 |
| Lowest energy conformation of receptor <b>CZ016</b> with pivalate anion                                                             | S183 |
| Lowest energy conformation of receptor <b>CZ016</b> with acetate anion                                                              | S184 |
| Lowest energy conformation of receptor <b>CZ016</b> with benzoate anion                                                             | S184 |
| Lowest energy conformation of receptor <b>CZ016</b> with lactate anion                                                              | S185 |
| Lowest energy conformation of receptor <b>CZ016</b> with formate anion                                                              | S185 |
| Lowest energy conformation of receptor <b>MC001</b>                                                                                 | S186 |
| Lowest energy conformation of receptor <b>MC001</b> with pivalate anion                                                             | S186 |
| Lowest energy conformation of receptor <b>MC001</b> with acetate anion                                                              | S187 |
| Lowest energy conformation of receptor <b>MC001</b> with benzoate anion                                                             | S187 |
| Lowest energy conformation of receptor <b>MC001</b> with lactate anion                                                              | S188 |
| Lowest energy conformation of receptor <b>MC001</b> with formate anion                                                              | S188 |
| Lowest energy conformation of receptor <b>MC002</b>                                                                                 | S189 |
| Lowest energy conformation of receptor <b>MC002</b> with pivalate anion                                                             | S189 |
| Lowest energy conformation of receptor <b>MC002</b> with acetate anion                                                              | S190 |
| Lowest energy conformation of receptor <b>MC002</b> with benzoate anion                                                             | S190 |
| Lowest energy conformation of receptor <b>MC002</b> with lactate anion                                                              | S191 |
| Lowest energy conformation of receptor <b>MC002</b> with formate anion                                                              | S191 |
| Lowest energy conformation of receptor <b>MC003</b>                                                                                 | S192 |
| Lowest energy conformation of receptor <b>MC003</b> with pivalate anion                                                             | S192 |

|                                                                         |      |
|-------------------------------------------------------------------------|------|
| Lowest energy conformation of receptor <b>MC003</b> with acetate anion  | S193 |
| Lowest energy conformation of receptor <b>MC003</b> with benzoate anion | S193 |
| Lowest energy conformation of receptor <b>MC003</b> with lactate anion  | S194 |
| Lowest energy conformation of receptor <b>MC003</b> with formate anion  | S194 |
| Lowest energy conformation of receptor <b>MC004</b>                     | S195 |
| Lowest energy conformation of receptor <b>MC004</b> with pivalate anion | S195 |
| Lowest energy conformation of receptor <b>MC004</b> with acetate anion  | S196 |
| Lowest energy conformation of receptor <b>MC004</b> with benzoate anion | S196 |
| Lowest energy conformation of receptor <b>MC004</b> with lactate anion  | S197 |
| Lowest energy conformation of receptor <b>MC004</b> with formate anion  | S197 |
| Lowest energy conformation of receptor <b>MC005</b>                     | S198 |
| Lowest energy conformation of receptor <b>MC005</b> with pivalate anion | S198 |
| Lowest energy conformation of receptor <b>MC005</b> with acetate anion  | S199 |
| Lowest energy conformation of receptor <b>MC005</b> with benzoate anion | S199 |
| Lowest energy conformation of receptor <b>MC005</b> with lactate anion  | S200 |
| Lowest energy conformation of receptor <b>MC005</b> with formate anion  | S200 |
| Lowest energy conformation of receptor <b>MC006</b>                     | S201 |
| Lowest energy conformation of receptor <b>MC006</b> with pivalate anion | S201 |
| Lowest energy conformation of receptor <b>MC006</b> with acetate anion  | S202 |
| Lowest energy conformation of receptor <b>MC006</b> with benzoate anion | S202 |
| Lowest energy conformation of receptor <b>MC006</b> with lactate anion  | S203 |
| Lowest energy conformation of receptor <b>MC006</b> with formate anion  | S203 |
| Lowest energy conformation of receptor <b>MC007</b>                     | S204 |
| Lowest energy conformation of receptor <b>MC007</b> with pivalate anion | S204 |
| Lowest energy conformation of receptor <b>MC007</b> with acetate anion  | S205 |
| Lowest energy conformation of receptor <b>MC007</b> with benzoate anion | S205 |
| Lowest energy conformation of receptor <b>MC007</b> with lactate anion  | S206 |
| Lowest energy conformation of receptor <b>MC007</b> with formate anion  | S206 |
| Lowest energy conformation of receptor <b>MC008</b>                     | S207 |
| Lowest energy conformation of receptor <b>MC008</b> with pivalate anion | S207 |
| Lowest energy conformation of receptor <b>MC008</b> with acetate anion  | S208 |
| Lowest energy conformation of receptor <b>MC008</b> with benzoate anion | S208 |
| Lowest energy conformation of receptor <b>MC008</b> with lactate anion  | S209 |
| Lowest energy conformation of receptor <b>MC008</b> with formate anion  | S209 |
| Lowest energy conformation of receptor <b>MC009</b>                     | S210 |
| Lowest energy conformation of receptor <b>MC009</b> with pivalate anion | S210 |
| Lowest energy conformation of receptor <b>MC009</b> with acetate anion  | S211 |
| Lowest energy conformation of receptor <b>MC009</b> with benzoate anion | S211 |
| Lowest energy conformation of receptor <b>MC009</b> with lactate anion  | S212 |
| Lowest energy conformation of receptor <b>MC009</b> with formate anion  | S212 |
| Lowest energy conformation of receptor <b>MC010</b>                     | S213 |
| Lowest energy conformation of receptor <b>MC010</b> with pivalate anion | S213 |
| Lowest energy conformation of receptor <b>MC010</b> with acetate anion  | S214 |
| Lowest energy conformation of receptor <b>MC010</b> with benzoate anion | S214 |
| Lowest energy conformation of receptor <b>MC010</b> with lactate anion  | S215 |
| Lowest energy conformation of receptor <b>MC010</b> with formate anion  | S215 |

|                                                                         |      |
|-------------------------------------------------------------------------|------|
| Lowest energy conformation of receptor <b>MC011</b>                     | S216 |
| Lowest energy conformation of receptor <b>MC011</b> with pivalate anion | S216 |
| Lowest energy conformation of receptor <b>MC011</b> with acetate anion  | S216 |
| Lowest energy conformation of receptor <b>MC011</b> with benzoate anion | S217 |
| Lowest energy conformation of receptor <b>MC011</b> with lactate anion  | S217 |
| Lowest energy conformation of receptor <b>MC011</b> with formate anion  | S217 |
| Lowest energy conformation of receptor <b>MC012</b>                     | S218 |
| Lowest energy conformation of receptor <b>MC012</b> with pivalate anion | S218 |
| Lowest energy conformation of receptor <b>MC012</b> with acetate anion  | S218 |
| Lowest energy conformation of receptor <b>MC012</b> with benzoate anion | S219 |
| Lowest energy conformation of receptor <b>MC012</b> with lactate anion  | S219 |
| Lowest energy conformation of receptor <b>MC012</b> with formate anion  | S219 |
| Lowest energy conformation of receptor <b>MC013</b>                     | S220 |
| Lowest energy conformation of receptor <b>MC013</b> with pivalate anion | S220 |
| Lowest energy conformation of receptor <b>MC013</b> with acetate anion  | S221 |
| Lowest energy conformation of receptor <b>MC013</b> with benzoate anion | S221 |
| Lowest energy conformation of receptor <b>MC013</b> with lactate anion  | S222 |
| Lowest energy conformation of receptor <b>MC013</b> with formate anion  | S222 |
| Lowest energy conformation of receptor <b>MC014</b>                     | S222 |
| Lowest energy conformation of receptor <b>MC014</b> with pivalate anion | S223 |
| Lowest energy conformation of receptor <b>MC014</b> with acetate anion  | S223 |
| Lowest energy conformation of receptor <b>MC014</b> with benzoate anion | S223 |
| Lowest energy conformation of receptor <b>MC014</b> with lactate anion  | S224 |
| Lowest energy conformation of receptor <b>MC014</b> with formate anion  | S224 |

## General methods

### General purification procedures

Purification of the compounds was performed by column chromatography on silica gel (pore size 60 Å, 230–400 mesh for macrocycles **MC001–MC010** and 70–230 mesh for macrocycles **MC011–MC014**). Analytical thin-layer chromatography (TLC) was conducted on TLC plates (silica gel 60 with fluorescent UV<sub>254</sub> marker on aluminium backed sheets).

### Chemicals and raw materials

All starting materials and solvents used in syntheses were acquired from commercial sources (Sigma-Aldrich, Acros, Alfa Aesar, Fluka) with at least 97% purity and used as received. DMSO-*d*<sub>6</sub> for NMR was obtained from Sigma-Aldrich with at least 99.9% purity. Dry solvents were prepared at least 72 h before use in round-bottomed flasks supplied with 3 Å molecular sieves under an argon atmosphere.

All inert gases used for syntheses were of at least 5.0 purity. Water used in this work was obtained from a MilliQ Advantage A10 system or from an ELGA PURELAB® Ultra system.

For sensor development, the following chemicals were of Selectophore™ grade: bis(2-ethylhexyl) sebacate (DOS, ≥97%, Fluka), tridodecylmethylammonium chloride (TDMACl, Fluka), high molecular weight poly(vinyl chloride) (HMW PVC, Fluka), and tetrahydrofuran (THF, ≥99.5%, Sigma-Aldrich). Nitric acid (65%, J.T. Baker) was diluted for use in the electrode cleaning procedure. The remaining chemicals were of analytical or reagent grade with at least 99% purity, except for 3,4-ethylenedioxythiophene (EDOT, 97%), and acquired from Acros Organics, Alfa Aesar, Fluka, Merck, Sigma-Aldrich, and VWR Chemicals.



## General procedures for compound characterization

NMR measurements, characterization and assessment of purity of all synthesis products were carried out on a Bruker Avance-III 700 MHz NMR spectrometer. All spectra were recorded using TopSpin 3.2 software and the chemical shifts calibrated against the residual solvent signal.

COSMO-RS calculations were done using COSMOTermX19 parametrization BP\_TZVP\_C19 (solvent: DMSO with 0.5% water). UV-vis spectrophotometric measurements were carried out using a Thermo Nicolet Evolution 300 spectrophotometer.

For electrospray (ESI) HRMS analysis, the samples were first dissolved in DMSO with a concentration of  $\approx 2$  mg/ml and then diluted in MeOH containing 0.1% HCOOH ( $\text{pH}_{\text{abs}}^{\text{H}_2\text{O}}$  [1] in the range of 3–5) for ESI+ measurements or MeOH containing 0.1%  $\text{NH}_3 \cdot \text{H}_2\text{O}$  ( $\text{pH}_{\text{abs}}^{\text{H}_2\text{O}}$  in the range of 8–9) for ESI– measurements. Concentrations of compounds were chosen in such way that appropriate signal intensities were achieved and were in the range of 0.5–2  $\mu\text{g/mL}$ . HRMS spectra were obtained on a hybrid Varian 910-FT-ICR-MS system with electrospray ion source. Ionization parameters were as follows: spray chamber temperature, 40 °C; spray needle voltage, 5000 V (–4500 V in negative mode); nebulizing gas ( $\text{N}_2$ ) pressure, 30 psi; API-drying gas ( $\text{N}_2$ ), 15 psi at 300 °C; shield voltage, 600 V; capillary voltage 40 V. The ions, selected by quadrupole, were guided into the FT-ICR analyser cell. Ion guide parameters, FT-ICR ion guide and excitation parameters were optimized for the mass range ( $m/z = 100$ –1000). Ion collection time varied from 300 to 1000 ms. FT-ICR analyser cell parameters were: DAC rate 8000 kHz for  $m/z$  range of 100–800 direct (broadband); ADC rate 4 MHz; transient length was either 1024 K (262.144 ms) or 2048 K (524.288 ms). For the calibration of the mass axis, samples were spiked with an in-house prepared internal calibration solution, which contained ions with the following exact  $m/z$  values [2]:  $\text{C}_{16}\text{H}_{36}\text{N}^+$  ( $m/z = 242.28423$ );  $\text{C}_{19}\text{H}_{29}\text{N}_4\text{PF}_3^+$  ( $m/z$

= 401.20765);  $\text{C}_{26}\text{H}_{45}\text{N}_7\text{P}_2\text{Cl}^+$  ( $m/z = 552.28947$ );  $\text{C}_{26}\text{H}_{64}\text{N}_{13}\text{P}_4^+$  ( $m/z = 682.43526$ ) in ESI+ mode. For ESI- measurements, a calibration mixture containing anions of perfluorinated Brønsted superacids [3] was used. The ions used for calibration were:  $\text{C}_{12}\text{F}_{10}\text{NO}_4\text{S}_2^-$  ( $m/z = 475.91145$ );  $\text{C}_8\text{F}_{17}\text{NO}_2\text{SH}^-$  ( $m/z = 497.94620$ );  $\text{C}_8\text{F}_{18}\text{NO}_4\text{S}_2^-$  ( $m/z = 579.89868$ );  $\text{C}_{12}\text{F}_{26}\text{NO}_4\text{S}_2^-$  ( $m/z = 779.88591$ ). Concentrations of the calibrants in the infused solutions remained within 0.5–1.0  $\mu\text{M}$ .

For nano-ESIMS analysis, the solution was infused using a borosilicate emitter (Thermo Fisher Scientific) to an LTQ Orbitrap XL (Thermo Fisher Scientific) mass spectrometer using a spray voltage of 1.8 kV (tube lens 110 V, capillary temperature 200 °C). The instrument was operated in positive polarity. Ten mass spectra were collected at a resolution setting of 100,000 at 400  $m/z$ , spectra were averaged, and the presence of expected compounds was confirmed by mass accuracy within  $\pm 5$  ppm and by similarity to theoretical isotopic distribution.

The reference electrode that was used in all electrochemical measurements was a 6.0726.100 double-junction Ag/AgCl reference electrode (Metrohm AG, Switzerland). Glassy carbon (GC) rods (SIGRADUR® G, HTW Hochttemperatur-Werkstoffe GmbH, Germany) were used as counter electrodes and to prepare working electrodes in-house by fitting them into PVC rods (Simona AG, Germany). All electrochemical polymerisations of solid contacts and impedance measurements were performed with Autolab PGSTAT20 or PGSTAT30 potentiostats (EcoChemie BV, Netherlands) equipped with a FRA2 modules. An EMF16 multichannel interface (Lawson Labs, Inc., United States of America) was used for all potentiometric measurements. A pair of 800 Dosino pumps controlled by a 905 Titrando (Metrohm AG, Switzerland) were used for automated dilutions. pH measurements were performed with a Thermo Scientific Orion Star A111 pH-meter and a Thermo Scientific Orion 9157BNMD pH-electrode. All measurements were performed at room temperature ( $23 \pm 2$  °C).

### **Relative binding affinity measurements**

Binding of anions in solution was studied using our previously published relative  $^1\text{H}$  NMR titration method.[4] For sample preparation, a few milligrams of receptors were weighed into a NMR tube alongside an anchor molecule, to which binding had previously been quantified using absolute binding measurements.[4–6] The compounds were dissolved in 700  $\mu\text{L}$   $\text{DMSO-}d_6$  with a water content of either 0.5% or 10.0% (m/m)  $\text{H}_2\text{O}$ . Solutions of carboxylates were prepared by weighing the corresponding tetrabutylammonium salt into a vial and dissolving it in 1 mL  $\text{DMSO-}d_6$  with a water content of either 0.5% or 10.0% (m/m)  $\text{H}_2\text{O}$ . For each analyte, two solutions were prepared: a dilute (0.17–0.44 M) and a concentrated (0.65–1.41 M) solution. During the titration, a blank spectrum of pure receptors was initially obtained. Then, the analyte was added using an automatic titration syringe. The chemical shifts of the formed host–guest complexes were recorded for each titration step. The dilute solution was used during the first part of the titration, where complexation was partial. The concentrated sample was used towards the end of the titration to ensure full complexation of all host molecules. The recorded chemical shifts of all titration steps were used to calculate the differences of affinity to the anchor molecules, as described in reference [4]. Spectra of all titration experiments are available as supporting information.

### **Preparation of the membrane cocktails**

The solvent polymeric membranes were prepared using PVC, DOS as the plasticiser, and TDMACl as the anion exchanger. The ion-selective membranes (ISMs) were prepared with the following composition as the target: 2 wt % ionophore, 50 mol % TDMACl relative to the ionophore, 65 wt % DOS, and 32 wt % PVC. A control membrane was prepared with no ionophore, 0.7 wt % TDMACl, 66 wt % DOS, and 33 wt % PVC. The membrane components were dissolved in THF to produce membrane cocktails containing 83 wt % THF. See Table S1 for the final compositions of the membrane cocktails.

**Table S1:** Compositions of the membrane cocktails used in this study

| component   | wt. % |       |       |       |
|-------------|-------|-------|-------|-------|
|             | CTRL  | MC005 | MC009 | MC012 |
| ionophore   | 0.00  | 0.33  | 0.33  | 0.33  |
| TDMACl      | 0.12  | 0.12  | 0.11  | 0.12  |
| PVC         | 5.77  | 5.40  | 5.30  | 5.45  |
| DOS         | 11.22 | 10.75 | 11.03 | 10.80 |
| dry (total) | 17.11 | 16.61 | 16.78 | 16.69 |
| THF         | 82.89 | 83.39 | 83.22 | 83.31 |

## **Preparation of the sensor prototypes**

Glassy carbon rods (3 mm diameter) encased in PVC (8 mm diameter) were used as the electrode bodies for the sensors. The electrodes were polished using sandpapers, diamond pastes (1–15  $\mu\text{m}$ ), and alumina paste (0.3  $\mu\text{m}$ ). The electrodes were cleaned prior to electrochemical polymerisation of the solid contact by ultrasonication in deionized water and in ethanol and soaking in 1 M nitric acid. A layer of PEDOT doped with chloride was deposited as the solid contact onto the exposed GC surface ( $A \approx 0.07 \text{ cm}^2$ ) of each electrode. The polymerisations were performed one sensor at a time with a three-electrode cell using a double-junction Ag/AgCl/3 M KCl/1 M KCl reference electrode, a bare GC rod as the counter electrode, and the sensor as the working electrode. The monomer solution, which contained 0.01 M EDOT and 0.1 M KCl, was deaerated by bubbling  $\text{N}_2$  through the solution prior to the polymerisations and then blanketed with  $\text{N}_2$  during the polymerisations. The polymerisations were performed galvanostatically by applying a constant current of 14  $\mu\text{A}$  for 714 s (10 mC polymerisation charge). The sensors were conditioned in 0.1 M sodium acetate at least overnight and then air-dried prior to drop-casting the membranes. The membranes were drop-cast onto the sensors in two passes of 50  $\mu\text{L}$  with approximately 30 minutes between passes for a total of 100  $\mu\text{L}$  of membrane cocktail applied to each sensor. The THF was allowed to evaporate overnight and then the sensors were conditioned in 0.1 M sodium acetate for at least three days prior to characterisation. Three sensors were prepared with each membrane for this study.

## **Electrochemical impedance spectroscopy**

The sensors were conditioned in 0.1 M sodium acetate prior to the electrochemical impedance spectroscopic (EIS) measurements. EIS measurements were performed in 0.1 M sodium acetate with a three-electrode cell using a double-junction Ag/AgCl/3 M KCl/1 M KCl reference

electrode, a GC rod as the counter electrode, and the sensors as the working electrodes. The measurements were performed potentiostatically at 0 V versus the open-circuit potential using a sinusoidal excitation signal with an amplitude of 100 mV (RMS). Sixty-one measurement points were measured in the frequency range 100 mHz–100 kHz.

### **Potentiometric measurements**

The sensors were conditioned in 0.01 M sodium acetate prior to all of the potentiometric measurements. Liquid junction potentials were estimated using the Henderson equation. Activity coefficients were estimated using the extended Debye–Hückel equation.

### **Calibration**

Potentiometric calibrations were performed with 0.1 M sodium acetate solutions that were diluted with deionized water in half-decade steps. The dilutions were performed at seven-minute intervals with pre-programmed pumps until reaching concentrations where the sensors' potentiometric responses levelled out. Mixing of the solutions was left to the pumping action that occurred during the dilutions. Multiple calibrations were performed with each sensor over the course of their life spans.

### **pH Sensitivity**

The pH sensitivity of the sensors was assessed by measuring their potentiometric responses in 0.01 M acetic acid that was titrated with a mixture of 0.25 M sodium hydroxide and 0.01 M sodium acetate. The pH of the samples was monitored during the measurements and the samples were titrated from pH 3.3 to 10 with constant stirring.

## Selectivity

Potentiometric selectivity coefficients,  $K_{\text{acetate},j}^{\text{pot}}$ , were determined according to the separate solution method (SSM) using solutions with activities of interfering ions equal to that of acetate in a sodium acetate solution with the concentration 0.01 M. The solutions were deaerated by bubbling  $\text{N}_2$  through each solution for at least 15 minutes prior to each measurement and then letting  $\text{N}_2$  blanket the solution during each measurement. The deaeration was done as a precaution to minimise possible interference due to species originating from dissolved atmospheric carbon dioxide. Constant stirring was used throughout each measurement. The reference electrode was placed in the sample solution after rinsing the sensors with deionized water and drying them. The measurement was started, the sensors were immersed in the solution, and the potentials were measured for at least seven minutes. The measurements were performed with the interfering anion solutions in the order of increasing lipophilicity. The selectivity coefficients were calculated using the experimental slopes determined for each electrode and the potentials that were recorded seven minutes into each selectivity measurement.

## Synthesis and characterisation of compounds

Compound **2** was prepared as in reference [7]. Compounds **6–8** were prepared based on reference [8], but with slight modifications (please refer to Scheme 1 in main text).

**1,8-Dibromo-3,6-di-*tert*-butyl-9*H*-carbazole (4)** was prepared according to known procedure [9].

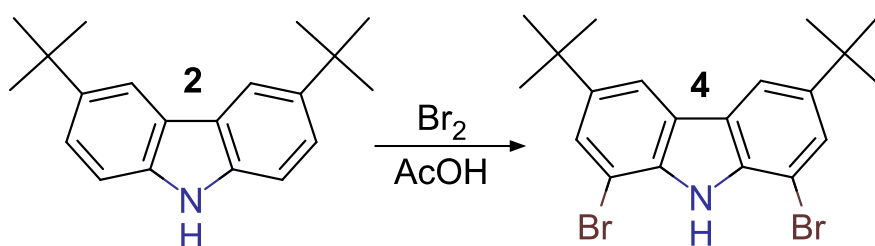

For preparation of 3,6-di-*tert*-butyl-9*H*-carbazole-1,8-diamine (**5a**), a general procedure from the work of Jung *et al.* [10] was modified as follows:

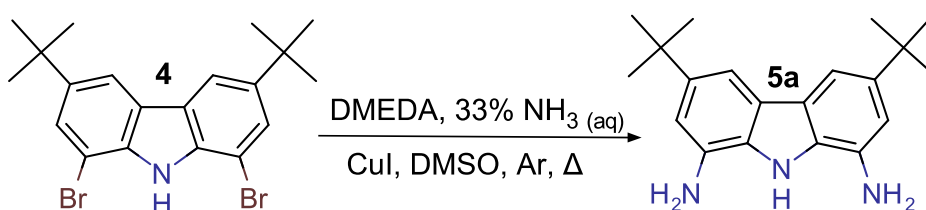

A 100-mL pressure tube (withstanding a maximum pressure of 10 bar at 120 °C) was charged with a stirring bar, 1,8-dibromo-3,6-di-*tert*-butyl-9*H*-carbazole (compound **4**, 2.00 g, 4.57 mmol) and  $\text{CuI}$  (261 mg, 1.37 mmol). DMSO (24 mL) was added and argon gas was bubbled through for 5 minutes while the mixture was magnetically stirred. Under argon counterflow, *N,N*'-dimethylethylenediamine (221  $\mu\text{L}$ , 2.06 mmol) was added, and argon was bubbled through the mixture for an additional minute. After that, the argon flow was stopped and the flask was closed with a screwcap. The contents were magnetically stirred for 20 minutes and then cooled in a water bath (10–15 °C). The stirring was stopped and the screwcap removed, then under an argon counterflow, 12 mL of 33% aqueous  $\text{NH}_3$  solution were carefully



added to the mixture by tube sidewalls without disturbing the contents. Argon flow was removed and the pressure tube was tightly closed with a screwcap. The mixture was vigorously stirred in an oil bath at 130 °C for 18 h. After that, the tube was cooled to approximately 15 °C and its contents were diluted with 100 mL of ethyl acetate. The mixture was filtrated and brine (250 mL) was added to the filtrate. Phases were separated and the aqueous phase was extracted with ethyl acetate (3 × 50 mL). The combined organic phases were washed with brine, dried over anhydrous Na<sub>2</sub>SO<sub>4</sub>, filtered and solvents removed by evaporation. The resulting residue was triturated with 10 mL DCM, then 100 mL of *n*-hexane was added and the mixture cooled in an ice bath. The precipitate was filtered and washed three times with cold *n*-hexane/DCM 10:1 mixture to yield tan crystals (1.20 g, 3.88 mmol, 85%), the structure of which was confirmed to be identical with literature data [8].

**General procedure for preparation of diacyl chlorides (ClCO(CH<sub>2</sub>)<sub>*n*</sub>COCl, *n* = 11–14):**

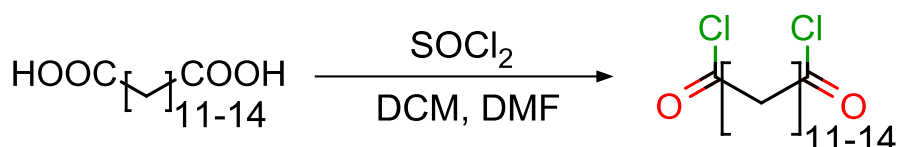

An oven-dried 10-mL round-bottomed flask was charged with a dicarboxylic acid (1 mmol) and a magnetic stirring bar. Then, 2 mL of dry DCM and 1 drop of dry DMF were added. The flask was flushed with argon and closed with a septum through which an argon-filled balloon was connected. The mixture was stirred and thionyl chloride (0.29 mL, 4 mmol) was added dropwise through the septum via syringe. After 4 h of stirring at room temperature the reaction was complete by <sup>1</sup>H NMR analysis. Solvents and residual SOCl<sub>2</sub> were evaporated, the residue dried in vacuo and used in further experiments without additional purification.

## Preparation of compound CZ016

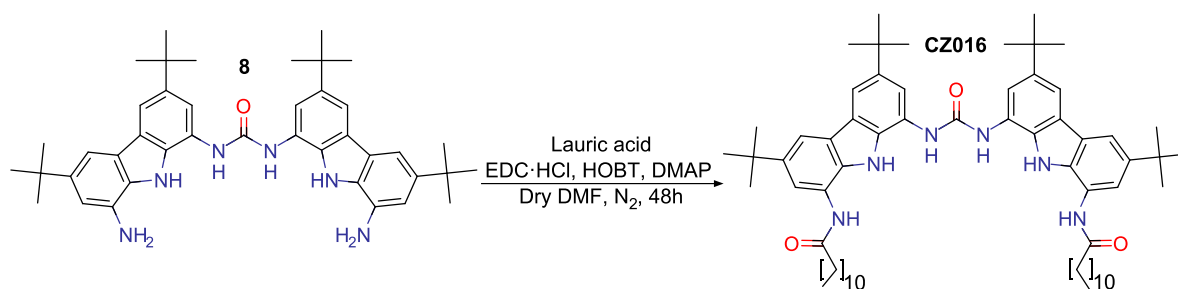

Under N<sub>2</sub> atmosphere, compound **8** (0.050 g, 0.08 mmol), lauric acid (0.038 g, 0.08 mmol), EDC·HCl (0.036 g, 0.19 mmol), HOBT (0.029 g, 0.19 mmol) and DMAP (0.023 g, 0.19 mmol) were dissolved in dry DMF (4 mL). The reaction mixture was stirred for 48 h at room temperature. After disappearance of starting material (monitored by TLC), the reaction mixture was quenched in water (50 mL). The formed precipitate was filtered and washed with water (50 mL). The crude product was purified by column chromatography eluting with 7–9% ethyl acetate in hexane to get compound **CZ016** (0.050 g, 0.05 mmol, 63.8%) as brown solid.

Data for **CZ016**. <sup>1</sup>H NMR (700.1 MHz, DMSO-*d*<sub>6</sub>, +25 °C) δ: 10.10 (bs, 2H, amide NH), 10.00 (bs, 2H, carb. NH), 8.89 (bs, 2H, urea NH), 7.95 (s, 2H, CH-5), 7.93 (s, 2H, CH-4), 7.68 (s, 2H, CH-7), 7.53 (s, 2H, CH-2), 2.40-2.35 (m, 4H, -CO-CH<sub>2</sub>), 1.61-1.56 (m, 4H, -CO-CH<sub>2</sub>-CH<sub>2</sub>), 1.42 (s, 18H, *t*-butyl-CH<sub>3a</sub> or CH<sub>3b</sub>), 1.40 (s, 18H, *t*-butyl-CH<sub>3a</sub> or CH<sub>3b</sub>), 1.37-1.20 (m, 32H, (CH<sub>2</sub>)<sub>8</sub>), 0.91-0.81 (m, 6H, -CH<sub>2</sub>-CH<sub>3</sub>). <sup>13</sup>C NMR (176.0 MHz, DMSO-*d*<sub>6</sub>, +25 °C) δ: 171.5 (amide C=O), 153.7 (urea C=O), 141.8 (C-3), 141.5 (C-6), 131.2 (C-12), 130.5 (C-9), 124.6 (C-10), 124.5 (C-11), 123.0 (C-1), 122.6 (C-8), 116.5 (C-7), 116.1 (C-2), 112.1 (C-5), 111.9 (C-4), 36.1 (-CO-CH<sub>2</sub>), 34.5 (*t*-butyl-C<sub>a</sub> or C<sub>b</sub>), 34.4 (*t*-butyl-C<sub>a</sub> or C<sub>b</sub>), 31.9, 31.8, 31.3, 29.0, 29.0, 28.9, 28.8, 28.7, 28.7, 25.2, 22.1, 13.9 (-CH<sub>2</sub>-CH<sub>3</sub>). ESI-FT-ICR (-): solvent ~ 0.01% DMSO:methanol, *m/z* of [M-H]<sup>-</sup> calculated for C<sub>65</sub>H<sub>95</sub>N<sub>6</sub>O<sub>3</sub>, 1007.74711 found 1007.74706.

## Preparation of compound MC001

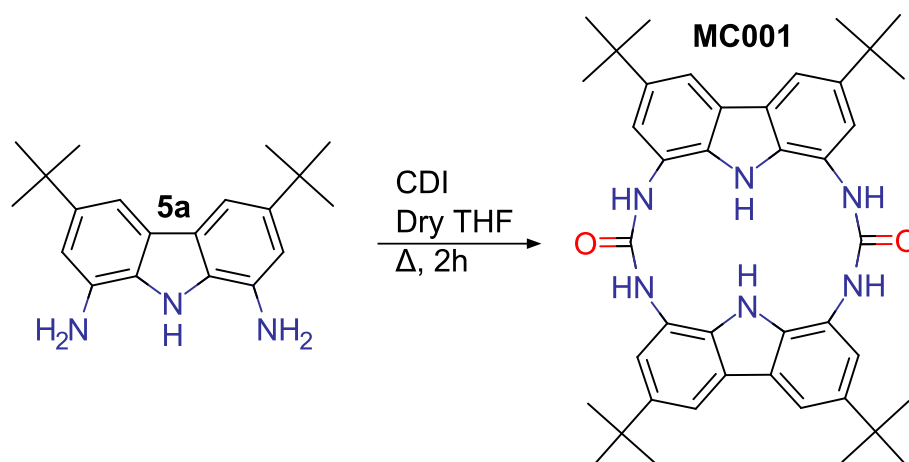

Compound **5a** (0.075 g, 0.24 mmol) was dissolved in dry THF (4 mL), then CDI (0.10 g, 0.43 mmol) was added. The reaction mixture was stirred at reflux temperature for 2 h. After disappearance of the starting material (monitored by TLC), the reaction mixture was cooled and concentrated under reduced pressure. The obtained solid was quenched in H<sub>2</sub>O (100 mL) and extracted in ethyl acetate (50 mL). The ethyl acetate layer was concentrated under reduced pressure. The crude product was purified by column chromatography eluting with 1% MeOH in DCM to obtain compound **MC001** (0.070 g, 0.10 mmol, 83.3%) as off-white solid.

Data for **MC001**. <sup>1</sup>H NMR (700.1 MHz, DMSO-d<sub>6</sub>, +25 °C)  $\delta$ : 9.87 (bs, 2H, carb. NH), 9.20 (bs, 4H, amide NH), 8.01 (d,  $J = 1.4$  Hz, 4H, CH-4), 7.16 (d,  $J = 2.1$  Hz, 4H, CH-2), 1.44 (s, 36H, *t*-butyl-CH<sub>3</sub>). <sup>13</sup>C NMR (176.0 MHz, DMSO-d<sub>6</sub>, +25 °C)  $\delta$ : 153.7 (urea CO), 143.2 (C-3), 134.4 (C-6), 126.9 (C-5), 123.9 (C-1), 117.2 (C-2), 113.5 (C-4), 34.9 (*t*-butyl-C), 32.3 (*t*-butyl-CH<sub>3</sub>). ESI-ICR (+): solvent ~ 0.01% DMSO:methanol,  $m/z$  of [M+H]<sup>+</sup> calculated for C<sub>42</sub>H<sub>49</sub>N<sub>6</sub>O<sub>2</sub>, 669.39225 found 669.39217.

## Preparation of compound MC002

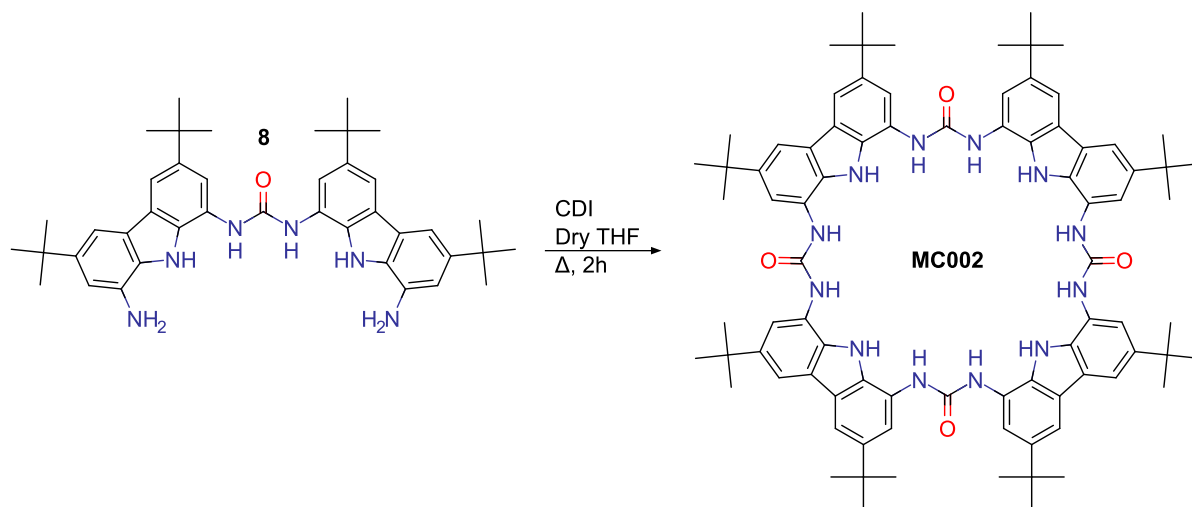

Compound **8** (0.10 g, 0.15 mmol), was dissolved in dry THF (25 mL), then CDI (0.04 g, 0.24 mmol) was added. The reaction mixture was stirred at reflux temperature for 6 h. After disappearance of the starting material (monitored by TLC), the reaction mixture was cooled and concentrated under reduced pressure. The obtained solid was quenched in 50 mL H<sub>2</sub>O and extracted with 50 mL ethyl acetate. The ethyl acetate layer was concentrated under reduced pressure. The obtained solid was treated with chloroform (20 mL), filtered and washed with chloroform (60 mL). The solid insoluble in chloroform was pure compound **MC002** (0.04 g, 0.03 mmol, 38.4%) isolated as off-white solid.

Data for **MC002**. <sup>1</sup>H NMR (700.1 MHz, DMSO-d<sub>6</sub>, +25 °C)  $\delta$ : 9.86 (bs, 4H, carb. NH), 9.21 (bs, 8H, amide NH), 8.01 (d,  $J = 1.18$  Hz, 8H, CH-4), 7.16 (d,  $J = 1.18$  Hz, 8H, CH-2), 1.44 (s, 72H, (*t*-butyl-CH<sub>3</sub>)). <sup>13</sup>C NMR (176.0 MHz, DMSO-d<sub>6</sub>, +25 °C)  $\delta$ : 153.7 (urea CO), 143.3 (C-3), 134.5 (C-6), 127.0 (C-5), 124.0 (C-1), 117.3 (C-2), 113.6 (C-4), 35.0 (*t*-butyl-C), 32.3 (*t*-butyl-CH<sub>3</sub>). ESI-ICR (+): solvent ~ 0.01% DMSO:methanol,  $m/z$  of [M+H]<sup>+</sup> calculated for C<sub>84</sub>H<sub>101</sub>N<sub>12</sub>O<sub>4</sub>, 1341.80687 found 1341.80722.

## Preparation of macrocyclic receptors MC003–MC010

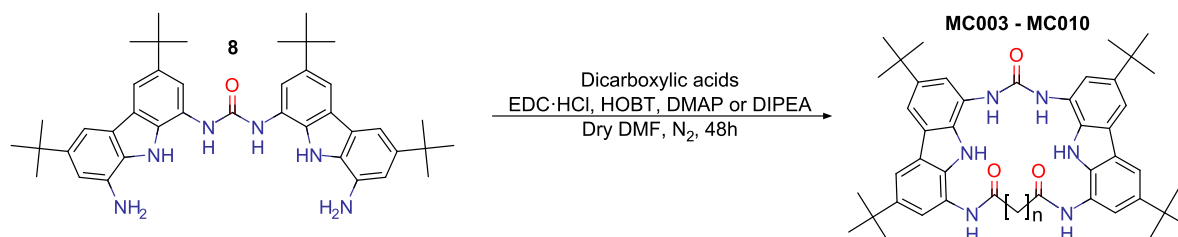

1,3-Bis(8-amino-3,6-di-*tert*-butyl-9*H*-carbazol-1-yl)urea (**8**) was dissolved in dry DMF alongside EDC·HCl, HOBT and, for receptors **MC003–MC006**, DMAP or, for receptors **MC007–MC010**, DIPEA. The corresponding dicarboxylic acid was added. The flask was charged with a magnetic stirring bar and closed with a septum, evacuated and backfilled with N<sub>2</sub> after which a N<sub>2</sub>-filled balloon was connected through the septum. The mixture was stirred at room temperature. After disappearance of starting material (monitored by TLC) the reaction was quenched in water (50 mL). The formed precipitate was filtered and washed with water (50 mL). The crude product was purified by column chromatography eluting with MeOH in DCM to afford the macrocycles **MC003–MC010** as white to off-white crystalline powders in 29–87% yields. Please refer to Table S2 for exact reaction conditions for **MC003–MC014**.

## Preparation of macrocyclic receptors MC011–MC014

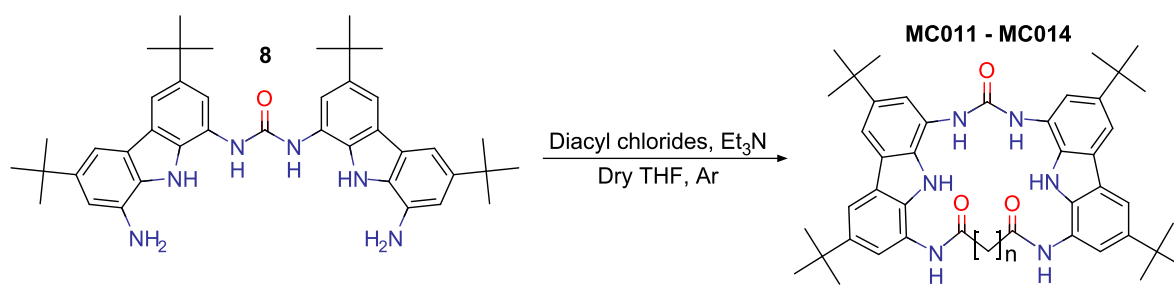

An oven-dried 100-mL round-bottomed flask was charged with a magnetic stirring bar and 1,3-bis(8-amino-3,6-di-*tert*-butyl-9*H*-carbazol-1-yl)urea (**8**) hydrochloride salt (100 mg, 0.139 mmol). The flask was closed with a septum, evacuated and backfilled with argon (3 times) after which an argon-filled balloon was connected through the septum. With a syringe, 36 mL of dry THF and 78  $\mu$ L of triethylamine (0.56 mmol) were added and the contents were stirred. To the resulting suspension, the diacyl chloride solution in dry THF (0.139 mmol in 4 mL THF) was added dropwise during one hour. The mixture was stirred overnight at room temperature and then quenched by the addition of 0.1 mL of water. The solvent was removed by evaporation and the residue dissolved in 40 mL of DCM. The solution was washed with 20 mL of 10% aqueous K<sub>2</sub>CO<sub>3</sub> and the phases were separated. The aqueous phase was extracted with DCM (3  $\times$  10 mL) and the combined organic phases were dried on anhydrous Na<sub>2</sub>SO<sub>4</sub>, filtered, and the solvent evaporated. The residue was purified by column chromatography eluting with DCM-MeOH to yield the desired macrocycles as white to off-white crystals in 25–44% yields. Please refer to Table S2 for exact reaction conditions for **MC011–MC014**.

**Table S2:** Reaction conditions for **MC003–MC014**.

| Compound     | <b>8</b>             | EDC·HCl             | HOBt                | DMAP/DIPEA <sup>[a]</sup> | Dicarboxylic acid   |
|--------------|----------------------|---------------------|---------------------|---------------------------|---------------------|
| <b>MC003</b> | 80 mg;<br>0.12 mmol  | 59 mg;<br>0.31 mmol | 42 mg;<br>0.31 mmol | 39 mg;<br>0.31 mmol       | 16 mg;<br>0.12 mmol |
| <b>MC004</b> | 60 mg;<br>0.09 mmol  | 53 mg;<br>0.28 mmol | 37 mg;<br>0.28 mmol | 23 mg;<br>0.19 mmol       | 14 mg;<br>0.09 mmol |
| <b>MC005</b> | 80 mg;<br>0.12 mmol  | 71 mg;<br>0.37 mmol | 50 mg;<br>0.37 mmol | 45 mg;<br>0.37 mmol       | 20 mg;<br>0.12 mmol |
| <b>MC006</b> | 85 mg;<br>0.13 mmol  | 76 mg;<br>0.40 mmol | 53 mg;<br>0.40 mmol | 48 mg;<br>0.40 mmol       | 23 mg;<br>0.13 mmol |
| <b>MC007</b> | 91 mg;<br>0.14 mmol  | 81 mg;<br>0.42 mmol | 57 mg;<br>0.42 mmol | 55 mg;<br>0.42 mmol       | 26 mg;<br>0.14 mmol |
| <b>MC008</b> | 100 mg;<br>0.16 mmol | 89 mg;<br>0.47 mmol | 63 mg;<br>0.47 mmol | 63 mg;<br>0.47 mmol       | 31 mg;<br>0.16 mmol |
| <b>MC009</b> | 110 mg;<br>0.17 mmol | 98 mg;<br>0.51 mmol | 69 mg;<br>0.51 mmol | 66 mg;<br>0.51 mmol       | 37 mg;<br>0.17 mmol |
| <b>MC010</b> | 100 mg;<br>0.16 mmol | 91 mg;<br>0.48 mmol | 54 mg;<br>0.40 mmol | 61 mg;<br>0.48 mmol       | 36 mg;<br>0.16 mmol |

| Compound                   | Solvent <sup>[b]</sup> | Reaction time <sup>[c]</sup> | Column eluent                | Yield                 |
|----------------------------|------------------------|------------------------------|------------------------------|-----------------------|
| <b>MC003</b>               | 5 ml DMF               | 60 h                         | 1-2% MeOH/DCM <sup>[e]</sup> | 70 mg; 0.09 mmol; 76% |
| <b>MC004</b>               | 5 ml DMF               | 45 h                         | 1-2% MeOH/DCM <sup>[e]</sup> | 50 mg; 0.07 mmol; 71% |
| <b>MC005</b>               | 5 ml DMF               | 45 h                         | 1-2% MeOH/DCM <sup>[e]</sup> | 80 mg; 0.10 mmol; 87% |
| <b>MC006</b>               | 5 ml DMF               | 45 h                         | 1-2% MeOH/DCM <sup>[e]</sup> | 50 mg; 0.06 mmol; 48% |
| <b>MC007</b>               | 5 ml DMF               | 40 h                         | 1-2% MeOH/DCM <sup>[e]</sup> | 60 mg; 0.08 mmol; 53% |
| <b>MC008</b>               | 5 ml DMF               | 40 h                         | 1-2% MeOH/DCM <sup>[e]</sup> | 75 mg; 0.09 mmol; 64% |
| <b>MC009</b>               | 5 ml DMF               | 40 h                         | 1-2% MeOH/DCM <sup>[e]</sup> | 40 mg; 0.05 mmol; 29% |
| <b>MC010</b>               | 5 ml DMF               | 40 h                         | 1-2% MeOH/DCM <sup>[e]</sup> | 50 mg; 0.06 mmol; 37% |
| <b>MC011<sup>[d]</sup></b> | 40 ml THF              | overnight                    | 1% MeOH/DCM <sup>[f]</sup>   | 52 mg; 0.06 mmol; 44% |
| <b>MC012<sup>[d]</sup></b> | 40 ml THF              | overnight                    | 1% MeOH/DCM <sup>[f]</sup>   | 47 mg; 0.05 mmol; 39% |
| <b>MC013<sup>[d]</sup></b> | 40 ml THF              | overnight                    | 1% MeOH/DCM <sup>[f]</sup>   | 48 mg; 0.05 mmol; 39% |
| <b>MC014<sup>[d]</sup></b> | 40 ml THF              | overnight                    | 1% MeOH/DCM <sup>[f]</sup>   | 31 mg; 0.04 mmol; 25% |

<sup>a</sup> - DMAP for **MC001–MC010**, DIPEA for **MC011–MC014**; <sup>b</sup> - all solvents dried before use;

<sup>c</sup> - all reactions at room temperature; <sup>d</sup> – amount of **8** for reaction was 100 mg; 0.14 mmol; <sup>e</sup> - gradient elution; <sup>f</sup> - isocratic elution.

Data for **MC003**.  $^1\text{H}$  NMR (700.1 MHz, DMSO- $d_6$ , +25 °C)  $\delta$ : 10.24 (bs, 2H, carb.  $\text{NH}$ ), 9.96 (bs, 2H, amide  $\text{NH}$ ), 8.95 (bs, 2H, urea  $\text{NH}$ ), 7.99 (d,  $J = 1.4$  Hz, 2H,  $\text{CH}$ -5), 7.97 (d,  $J = 1.4$  Hz, 2H,  $\text{CH}$ -4), 7.91 (d,  $J = 1.4$  Hz, 2H,  $\text{CH}$ -7), 7.15, (d,  $J = 1.4$  Hz, 2H,  $\text{CH}$ -2), 2.52-2.49 (m, 4H, -CO- $\text{CH}_2$ ), 2.12-2.11 (m, 2H, -CO- $\text{CH}_2$ - $\text{CH}_2$ ), 1.43 (s, 18H, *t*-butyl- $\text{CH}_3$ <sub>a</sub> or  $\text{CH}_3$ <sub>b</sub>), 1.40 (s, 18H, *t*-butyl-  $\text{CH}_3$ <sub>a</sub> or  $\text{CH}_3$ <sub>b</sub>).  $^{13}\text{C}$  NMR (176.0 MHz, DMSO- $d_6$ , +25 °C)  $\delta$ : 172.1 (amide  $\text{CO}$ ), 154.7 (urea  $\text{CO}$ ), 142.1 ( $\text{C}$ -3 or  $\text{C}$ -6), 142.8 ( $\text{C}$ -3 or  $\text{C}$ -6), 132.1 ( $\text{C}$ -12), 131.1 ( $\text{C}$ -9), 125.2 ( $\text{C}$ -11), 124.4 ( $\text{C}$ -10), 123.1 ( $\text{C}$ -1), 122.9 ( $\text{C}$ -8), 117.8 ( $\text{C}$ -7), 117.1 ( $\text{C}$ -2), 113.0 ( $\text{C}$ -4 &  $\text{C}$ -5), 35.3 (CO- $\text{CH}_2$ ), 34.9 (*t*-butyl- $\text{C}_a$  or  $\text{C}_b$ ), 34.8 (*t*-butyl- $\text{C}_a$  or  $\text{C}_b$ ), 32.3 (*t*-butyl- $\text{CH}_3$ <sub>a</sub> or  $\text{CH}_3$ <sub>b</sub>), 32.3 (*t*-butyl- $\text{CH}_3$ <sub>a</sub> or  $\text{CH}_3$ <sub>b</sub>), 21.5 (-CO- $\text{CH}_2$ - $\text{CH}_2$ ). ESI FT-ICR (+): solvent methanol (0.1% HCOOH),  $m/z$  of  $[\text{M}+\text{H}]^+$  calculated for  $\text{C}_{46}\text{H}_{57}\text{N}_6\text{O}_3$ , 741.44867 found 741.44826.

Data for **MC004**.  $^1\text{H}$  NMR (700.1 MHz, DMSO- $d_6$ , +25 °C)  $\delta$ : 10.17 (bs, 2H, amide  $\text{NH}$ ), 9.35 (bs, 2H, carb  $\text{NH}$ ), 8.90 (bs, 2H, urea  $\text{NH}$ ), 8.01 (d,  $J = 1.4$  Hz, 2H,  $\text{CH}$ -5), 7.90 (d,  $J = 1.4$  Hz, 2H,  $\text{CH}$ -4), 7.84 (d,  $J = 1.4$  Hz, 2H,  $\text{CH}$ -2), 7.40 (d,  $J = 1.4$  Hz, 2H,  $\text{CH}$ -7), 2.58-2.52 (m, 4H, -CO- $\text{CH}_2$ ), 1.93-1.91 (m, 4H, -CO- $\text{CH}_2$ - $\text{CH}_2$ ), 1.45 (s, 18H, *t*-butyl- $\text{CH}_3$ <sub>a</sub> or  $\text{CH}_3$ <sub>b</sub>), 1.42 (s, 18H, *t*-butyl- $\text{CH}_3$ <sub>a</sub> or  $\text{CH}_3$ <sub>b</sub>).  $^{13}\text{C}$  NMR (176.0 MHz, DMSO- $d_6$ , +25 °C)  $\delta$ : 171.6 (amide  $\text{CO}$ ), 153.6 (urea  $\text{CO}$ ), 142.6 ( $\text{C}$ -3 or  $\text{C}$ -6), 142.4 ( $\text{C}$ -3 or  $\text{C}$ -6), 131.8 ( $\text{C}$ -9), 130.4 ( $\text{C}$ -12), 125.0 ( $\text{C}$ -11), 124.1 ( $\text{C}$ -10), 123.3 ( $\text{C}$ -1), 122.4 ( $\text{C}$ -8), 117.1 ( $\text{C}$ -7), 115.4 ( $\text{C}$ -2), 113.3 ( $\text{C}$ -5), 111.4 ( $\text{C}$ -4), 35.3 (CO- $\text{CH}_2$ ), 34.6 (*t*-butyl- $\text{C}_a$  or  $\text{C}_b$ ), 34.4 (*t*-butyl- $\text{C}_a$  or  $\text{C}_b$ ), 32.0 (*t*-butyl- $\text{CH}_3$ <sub>a</sub> or  $\text{CH}_3$ <sub>b</sub>), 31.8 (*t*-butyl- $\text{CH}_3$ <sub>a</sub> or  $\text{CH}_3$ <sub>b</sub>), 24.4 (-CO- $\text{CH}_2$ - $\text{CH}_2$ ). ESI FT-ICR (+): solvent methanol (0.1% HCOOH),  $m/z$  of  $[\text{M}+\text{H}]^+$  calculated for  $\text{C}_{47}\text{H}_{59}\text{N}_6\text{O}_3$ , 755.46432 found 755.46429.

Data for **MC005**.  $^1\text{H}$  NMR (700.1 MHz, DMSO- $d_6$ , +25 °C)  $\delta$ : 10.07 (bs, 2H, amide  $\text{NH}$ ), 9.93 (bs, 2H, carb.  $\text{NH}$ ), 8.90 (bs, 2H, urea  $\text{NH}$ ), 7.98 (d,  $J = 1.4$  Hz, 2H,  $\text{CH}$ -5), 7.90 (d,  $J = 1.4$  Hz, 2H,  $\text{CH}$ -4), 7.91 (d,  $J = 1.4$  Hz, 2H,  $\text{CH}$ -2), 7.51 (d,  $J = 1.4$  Hz, 2H,  $\text{CH}$ -7), 2.56-2.52 (m, 4H, -CO- $\text{CH}_2$ - $\text{CH}_2$ ), 1.83-1.79 (m, 4H, (CO- $\text{CH}_2$ - $\text{CH}_2$ ), 1.60-1.56 (m, 2H, -CO- $\text{CH}_2$ - $\text{CH}_2$ - $\text{CH}_2$ ), 1.44 (s, 18H, *t*-butyl- $\text{CH}_3$ <sub>a</sub> or  $\text{CH}_3$ <sub>b</sub>), 1.40 (s, 18H, *t*-butyl- $\text{CH}_3$ <sub>a</sub> or  $\text{CH}_3$ <sub>b</sub>).  $^{13}\text{C}$  NMR (176.0 MHz,



DMSO-*d*<sub>6</sub>, +25 °C) δ: 172.1 (amide CO), 154.0 (urea CO), 142.6 (C-3 or C-6), 142.3 (C-3 or C-6), 131.6 (C-9), 130.9 (C-12), 125.4 (C-11), 124.5 (C-10), 123.9 (C-1), 123.1 (C-8), 117.1 (C-7), 115.6 (C-2), 113.3 (C-5), 111.8 (C-4), 35.6 (-CO-CH<sub>2</sub>-CH<sub>2</sub>-CH<sub>2</sub>), 35.0 (*t*-butyl-C<sub>a</sub> or C<sub>b</sub>), 34.9 (*t*-butyl-C<sub>a</sub> or C<sub>b</sub>), 32.4 (*t*-butyl-CH<sub>3a</sub> or CH<sub>3b</sub>), 32.3 (*t*-butyl-CH<sub>3a</sub> or CH<sub>3b</sub>), 28.4 (-CO-CH<sub>2</sub>-CH<sub>2</sub>-CH<sub>2</sub>), 24.8 (-CO-CH<sub>2</sub>-CH<sub>2</sub>-CH<sub>2</sub>). ESI FT-ICR (+): solvent methanol (0.1% HCOOC), *m/z* of [M+H]<sup>+</sup> calculated for C<sub>48</sub>H<sub>61</sub>N<sub>6</sub>O<sub>3</sub>, 769.47997 found 769.48020.

Data for **MC006**. <sup>1</sup>H NMR (700.1 MHz, DMSO-*d*<sub>6</sub>, +25 °C) δ: 10.11 (bs, 2H, amide NH), 9.66 (bs, 2H, carb. NH), 8.96 (bs, 2H, urea NH), 8.34 (d, *J* = 1.4 Hz, 2H, CH-2), 8.00 (d, *J* = 1.4 Hz, 2H, CH-5), 7.85 (d, *J* = 1.4 Hz, 2H, CH-4), 7.37, (d, *J* = 1.4 Hz, 2H, CH-7), 2.51-2.49 (m, 4H, -CO-CH<sub>2</sub>-CH<sub>2</sub>), 1.91-1.89 (m, 4H, (-CO-CH<sub>2</sub>-CH<sub>2</sub>-CH<sub>2</sub>), 1.55-1.53 (m, 4H, -CO-CH<sub>2</sub>-CH<sub>2</sub>-CH<sub>2</sub>), 1.45 (s, 18H, *t*-butyl-CH<sub>3a</sub> or CH<sub>3b</sub>), 1.41 (s, 18H, *t*-butyl-CH<sub>3a</sub> or CH<sub>3b</sub>). <sup>13</sup>C NMR (176.0 MHz, DMSO-*d*<sub>6</sub>, +25 °C) δ: 172.2 (amide CO), 153.2 (urea CO), 142.7 (C-3 or C-6), 142.4 (C-3 or C-6), 131.7 (C-9), 129.1 (C-12), 125.2 (C-8), 124.5 (C-10), 124.5 (C-11), 122.9 (C-1), 117.7 (C-7), 113.7 (C-2), 113.2 (C-5), 110.5 (C-4), 36.6 (-CO-CH<sub>2</sub>-CH<sub>2</sub>-CH<sub>2</sub>), 35.1 (*t*-butyl-C<sub>a</sub> or C<sub>b</sub>), 34.8 (*t*-butyl-C<sub>a</sub> or C<sub>b</sub>), 32.4 (*t*-butyl-CH<sub>3a</sub> or CH<sub>3b</sub>), 32.3 (*t*-butyl-CH<sub>3a</sub> or CH<sub>3b</sub>), 28.4 (-CO-CH<sub>2</sub>-CH<sub>2</sub>-CH<sub>2</sub>), 24.8 (-CO-CH<sub>2</sub>-CH<sub>2</sub>-CH<sub>2</sub>). ESI FT-ICR (-): solvent ~ 0.01% DMSO:isopropanol, *m/z* of [M+H]<sup>-</sup> calculated for C<sub>49</sub>H<sub>63</sub>N<sub>6</sub>O<sub>3</sub>, 783.4956 found 783.4956.

Data for **MC007**. <sup>1</sup>H NMR (700.1 MHz, DMSO-*d*<sub>6</sub>, +25 °C) δ: 10.00 (bs, 2H, amide NH), 9.99 (bs, 2H, carb. NH), 8.82 (bs, 2H, urea NH), 8.10 (d, *J* = 1.4 Hz, 2H, CH-2), 7.97 (d, *J* = 1.4 Hz, 2H, CH-5), 7.89 (d, *J* = 1.4 Hz, 2H, CH-4), 7.60 (d, *J* = 1.4 Hz, 2H, CH-7), 2.51-2.49 (m, 4H, -CO-CH<sub>2</sub>-CH<sub>2</sub>), 1.80-1.60 (m, 4H, -CO-CH<sub>2</sub>-CH<sub>2</sub>), 1.55-1.46 (m, 6H, CO-CH<sub>2</sub>-CH<sub>2</sub>-(CH<sub>2</sub>)<sub>2</sub>), 1.44 (s, 18H, *t*-butyl-CH<sub>3a</sub> or CH<sub>3b</sub>), 1.41 (s, 18H, *t*-butyl-CH<sub>3a</sub> or CH<sub>3b</sub>). <sup>13</sup>C NMR (176.0 MHz, DMSO-*d*<sub>6</sub>, +25 °C) δ: 171.9 (amide CO), 153.7 (urea CO), 142.5 (C-3 or C-6), 142.3 (C-3 or C-6), 131.4 (C-9), 130.5 (C-12), 125.2 (C-11), 124.5 (C-10), 124.1 (C-1), 123.0 (C-8), 117.1 (C-7), 115.5 (C-2), 113.2 (C-5), 111.5 (C-4), 36.4 (-CO-CH<sub>2</sub>-CH<sub>2</sub>-CH<sub>2</sub>), 35.0 (*t*-butyl-C<sub>a</sub> or

C<sub>b</sub>), 34.9 (*t*-butyl-C<sub>a</sub> or C<sub>b</sub>), 32.4 (*t*-butyl-CH<sub>3a</sub> or CH<sub>3b</sub>), 32.2 (*t*-butyl-CH<sub>3a</sub> or CH<sub>3b</sub>), 28.2 (-CO-CH<sub>2</sub>-CH<sub>2</sub>-CH<sub>2</sub>-CH<sub>2</sub>), 28.1 (-CO-CH<sub>2</sub>-CH<sub>2</sub>-CH<sub>2</sub>-CH<sub>2</sub>), 25.0 (-CO-CH<sub>2</sub>-CH<sub>2</sub>-CH<sub>2</sub>-CH<sub>2</sub>). ESI FT-ICR (-): solvent ~ 0.01% DMSO:isopropanol, *m/z* of [M+Na]<sup>+</sup> calculated for C<sub>50</sub>H<sub>64</sub>N<sub>6</sub>NaO<sub>3</sub>, 819.4932 found 819.4932.

Data for **MC008**. <sup>1</sup>H NMR (700.1 MHz, DMSO-*d*<sub>6</sub>, +25 °C) δ: 10.10 (bs, 2H, carb. NH), 10.05 (bs, 2H, amide NH), 8.87 (bs, 2H, urea NH), 8.10 (d, *J* = 1.4 Hz, 2H, CH-2), 7.96 (d, *J* = 1.4 Hz, 2H, CH-5), 7.89 (d, *J* = 1.4 Hz, 2H, CH-4), 7.70 (d, *J* = 1.4 Hz, 2H, CH-7), 2.51-2.49 (m, 4H, -CO-CH<sub>2</sub>-CH<sub>2</sub>), 1.81-1.70 (m, 4H, -CO-CH<sub>2</sub>-CH<sub>2</sub>), 1.45-1.11 (m, 8H, -CO-CH<sub>2</sub>-CH<sub>2</sub>-(CH<sub>2</sub>)<sub>2</sub>), 1.44 (s, 18H, *t*-butyl-CH<sub>3a</sub> or CH<sub>3b</sub>), 1.41 (s, 18H, *t*-butyl-CH<sub>3a</sub> or CH<sub>3b</sub>). <sup>13</sup>C NMR (176.0 MHz, DMSO-*d*<sub>6</sub>, +25 °C) δ: 171.5 (amide CO), 153.5 (urea CO), 142.0 (C-3 or C-6), 141.8 (C-3 or C-6), 130.3 (C-9), 130.2 (C-12), 124.9 (C-11), 124.1 (C-10), 123.5 (C-1), 122.8 (C-8), 116.0 (C-7), 115.8 (C-2), 112.4 (C-5), 111.1 (C-4), 35.7 (-CO-CH<sub>2</sub>-CH<sub>2</sub>-CH<sub>2</sub>), 34.6 (*t*-butyl-C<sub>a</sub> or C<sub>b</sub>), 34.4 (*t*-butyl-C<sub>a</sub> or C<sub>b</sub>), 31.9 (*t*-butyl-CH<sub>3a</sub> or CH<sub>3b</sub>), 31.8 (*t*-butyl-CH<sub>3a</sub> or CH<sub>3b</sub>), 27.9 (-CO-CH<sub>2</sub>-CH<sub>2</sub>-CH<sub>2</sub>-CH<sub>2</sub>), 27.4 (-CO-CH<sub>2</sub>-CH<sub>2</sub>-CH<sub>2</sub>-CH<sub>2</sub>), 24.3 (-CO-CH<sub>2</sub>-CH<sub>2</sub>-CH<sub>2</sub>-CH<sub>2</sub>). ESI FT-ICR (-): solvent ~ 0.01% DMSO:isopropanol, *m/z* of [M+Na]<sup>+</sup> calculated for C<sub>51</sub>H<sub>66</sub>N<sub>6</sub>NaO<sub>3</sub>, 833.5088 found 833.5061.

Data for **MC009**. <sup>1</sup>H NMR (700.1 MHz, DMSO-*d*<sub>6</sub>, +25 °C) δ: 10.11 (bs, 2H, carb. NH), 9.99 (bs, 2H, amide NH), 8.81 (bs, 2H, urea NH), 7.95 (d, *J* = 1.4 Hz, 2H, CH-5), 7.92 (d, *J* = 1.4 Hz, 2H, CH-4), 7.88 (d, *J* = 1.4 Hz, 2H, CH-2), 7.77 (d, *J* = 1.4 Hz, 2H, CH-7), 2.51-2.49 (m, 4H, -CO-CH<sub>2</sub>-CH<sub>2</sub>), 1.72-1.69 (m, 4H, -CO-CH<sub>2</sub>-CH<sub>2</sub>), 1.45-1.11 (m, 10H, -CO-CH<sub>2</sub>-CH<sub>2</sub>-(CH<sub>2</sub>)<sub>3</sub>), 1.43 (s, 18H, *t*-butyl-CH<sub>3a</sub> or CH<sub>3b</sub>), 1.40 (s, 18H, *t*-butyl-CH<sub>3a</sub> or CH<sub>3b</sub>). <sup>13</sup>C NMR (176.0 MHz, DMSO-*d*<sub>6</sub>, +25 °C) δ: 171.9 (amide CO), 154.4 (urea CO), 142.4 (C-3 or C-6), 142.2 (C-3 or C-6), 131.4 (C-9), 130.6 (C-12), 125.1 (C-11), 124.6 (C-10), 123.8 (C-1), 123.3 (C-8), 117.1 (C-2), 116.4 (C-7), 112.8 (C-5), 112.0 (C-4), 36.6 (-CO-CH<sub>2</sub>-CH<sub>2</sub>-CH<sub>2</sub>), 35.0 (*t*-butyl-C<sub>a</sub> or C<sub>b</sub>), 34.9 (*t*-butyl-C<sub>a</sub> or C<sub>b</sub>), 32.4 (*t*-butyl-CH<sub>3a</sub> or CH<sub>3b</sub>), 32.3 (*t*-butyl-CH<sub>3a</sub> or CH<sub>3b</sub>).

CH<sub>3b</sub>), 28.5 (-CO-CH<sub>2</sub>-CH<sub>2</sub>-CH<sub>2</sub>-CH<sub>2</sub>-CH<sub>2</sub>), 28.3 (-CO-CH<sub>2</sub>-CH<sub>2</sub>-CH<sub>2</sub>-CH<sub>2</sub>-CH<sub>2</sub>), 28.0 (-CO-CH<sub>2</sub>-CH<sub>2</sub>-CH<sub>2</sub>-CH<sub>2</sub>-CH<sub>2</sub>), 25.2 (-CO-CH<sub>2</sub>-CH<sub>2</sub>-CH<sub>2</sub>-CH<sub>2</sub>-CH<sub>2</sub>). ESI FT-ICR (-): solvent ~ 0.01% DMSO:isopropanol, *m/z* of [M+H]<sup>+</sup> calculated for C<sub>52</sub>H<sub>69</sub>N<sub>6</sub>O<sub>3</sub>, 825.5425 found 825.5426.

Data for **MC010**. <sup>1</sup>H NMR (700.1 MHz, DMSO-*d*<sub>6</sub>, +25 °C) δ: 10.10 (bs, 2H, carb. NH), 10.0 (bs, 2H, amide NH), 8.82 (bs, 2H, urea NH), 7.95 (d, *J* = 1.4 Hz, 2H, CH-5), 7.92 (d, *J* = 1.4 Hz, 2H, CH-4), 7.83 (d, *J* = 1.4 Hz, 2H, CH-2), 7.78 (d, *J* = 1.4 Hz, 2H, CH-7), 2.45-2.49 (m, 4H, -CO-CH<sub>2</sub>-CH<sub>2</sub>), 1.81-1.70 (m, 4H, -CO-CH<sub>2</sub>-CH<sub>2</sub>), 1.42 (s, 18H, *t*-butyl-CH<sub>3a</sub> or CH<sub>3b</sub>), 1.41 (s, 18H, *t*-butyl-CH<sub>3a</sub> or CH<sub>3b</sub>), 1.42-1.11 (m, 12H, -CO-CH<sub>2</sub>-CH<sub>2</sub>-(CH<sub>2</sub>)<sub>3</sub>). <sup>13</sup>C NMR (176.0 MHz, DMSO-*d*<sub>6</sub>, +25 °C) δ: 171.9 (amide CO), 154.5 (urea CO), 142.3 (C-3 or C-6), 142.2 (C-3 or C-6), 131.5 (C-9), 130.5 (C-12), 125.1 (C-11), 124.6 (C-10), 123.7 (C-1), 123.3 (C-8), 117.4 (C-2), 116.2 (C-7), 112.8 (C-5), 112.1 (C-4), 36.4 (-CO-CH<sub>2</sub>-CH<sub>2</sub>-CH<sub>2</sub>), 35.0 (*t*-butyl-C<sub>a</sub> or C<sub>b</sub>), 34.9 (*t*-butyl-C<sub>a</sub> or C<sub>b</sub>), 32.4 (*t*-butyl-CH<sub>3a</sub> or CH<sub>3b</sub>), 32.3 (*t*-butyl-CH<sub>3a</sub> or CH<sub>3b</sub>), 28.5 (-CO-CH<sub>2</sub>-CH<sub>2</sub>-CH<sub>2</sub>-CH<sub>2</sub>-CH<sub>2</sub>), 28.4 (-CO-CH<sub>2</sub>-CH<sub>2</sub>-CH<sub>2</sub>-CH<sub>2</sub>-CH<sub>2</sub>), 28.3 (-CO-CH<sub>2</sub>-CH<sub>2</sub>-CH<sub>2</sub>-CH<sub>2</sub>-CH<sub>2</sub>), 25.4 (-CO-CH<sub>2</sub>-CH<sub>2</sub>-CH<sub>2</sub>-CH<sub>2</sub>-CH<sub>2</sub>). ESI FT-ICR (-): solvent ~ 0.01% DMSO:isopropanol, *m/z* of [M+Na]<sup>+</sup> calculated for C<sub>53</sub>H<sub>70</sub>N<sub>6</sub>NaO<sub>3</sub>, 861.54071 found 861.54028.

Data for **MC011**. <sup>1</sup>H NMR (700.1 MHz, DMSO-*d*<sub>6</sub>, +25 °C) δ: 10.11 (s, 2H, carb. NH), 9.98 (s, 2H, amide NH), 8.82 (s, 2H, urea NH), 7.95 (s, 2H, CH-5), 7.93 (s, 2H, CH-4), 7.86 (s, 2H, CH-7), 7.73 (s, 2H, CH-2), 2.46 (t, *J* = 6.6 Hz, 4H, NHCOCH<sub>2</sub>), 1.67 (quint, *J* = 6.6 Hz, 4H, NHCOCH<sub>2</sub>CH<sub>2</sub>), 1.42 (s, 18H, *t*-Bu CH<sub>3</sub>), 1.41 (s, 18H, *t*-Bu CH<sub>3</sub>), 1.37 – 1.22 (m, 14H, aliphatic CH<sub>2</sub>). <sup>13</sup>C NMR (176.0 MHz, DMSO-*d*<sub>6</sub>, +25 °C) δ: 171.35 (amide CO), 154.16 (urea CO), 141.80 (C3/C6), 141.65 (C3/C6), 131.33 (C-12), 129.90 (C-9), 124.54 (C-10), 124.15 (C-11), 123.12 (C-1), 122.88 (C-8), 117.21 (C-2), 115.65 (C-7), 112.19 (C-5), 111.78 (C-4), 35.88 (NHCOCH<sub>2</sub>), 34.49 (*t*-Bu CCH<sub>3</sub>), 34.45 (*t*-Bu CCH<sub>3</sub>), 31.88 (*t*-Bu CCH<sub>3</sub>), 31.84 (*t*-Bu CCH<sub>3</sub>),

28.2 – 28.1 (4x aliphatic  $\underline{\text{CH}}_2$ ), 24.74 (NHCOCH $\underline{2}\underline{\text{CH}}_2$ ). ESI-ICR (+): solvent ~ 0.01% DMSO:methanol,  $m/z$  of  $[\text{M}+\text{H}]^+$  calculated for C<sub>54</sub>H<sub>73</sub>N<sub>6</sub>O<sub>3</sub>, 853.56995 found 853.57361.

Data for **MC012**. <sup>1</sup>H NMR (700.1 MHz, DMSO-d<sub>6</sub>, +25 °C)  $\delta$ : 10.11 (s, 2H, carb. NH), 9.98 (s, 2H, amide NH), 8.82 (s, 2H, urea NH), 7.95 (s, 2H, CH-5), 7.92 (s, 2H, CH-4), 7.81 (s, 2H, CH-7), 7.73 (s, 2H, CH-2), 2.45 (t,  $J = 7.3$  Hz, 4H, NHCOCH $\underline{2}$ ), 1.67 (quint,  $J = 7.3$  Hz, 4H, NHCOCH $\underline{2}\underline{\text{CH}}_2$ ), 1.41 (s, 18H, *t*-Bu CH $\underline{3}$ ), 1.40 (s, 18H, *t*-Bu CH $\underline{3}$ ), 1.36 – 1.21 (m, 16H, aliphatic CH $\underline{2}$ ). <sup>13</sup>C NMR (176.0 MHz, DMSO-d<sub>6</sub>, +25 °C)  $\delta$ : 171.40 (amide  $\underline{\text{CO}}$ ), 154.06 (urea  $\underline{\text{CO}}$ ), 141.80 ( $\underline{\text{C}}3/\underline{\text{C}}6$ ), 141.64 ( $\underline{\text{C}}3/\underline{\text{C}}6$ ), 131.19 ( $\underline{\text{C}}12$ ), 129.96 ( $\underline{\text{C}}9$ ), 124.56 ( $\underline{\text{C}}10$ ), 124.11 ( $\underline{\text{C}}11$ ), 123.10 ( $\underline{\text{C}}1$ ), 122.81 ( $\underline{\text{C}}8$ ), 116.98 ( $\underline{\text{C}}2$ ), 115.70 ( $\underline{\text{C}}7$ ), 112.27 ( $\underline{\text{C}}5$ ), 111.73 ( $\underline{\text{C}}4$ ), 36.03 (NHCOCH $\underline{2}$ ), 34.48 (*t*-Bu  $\underline{\text{C}}\text{CH}_3$ ), 34.44 (*t*-Bu  $\underline{\text{C}}\text{CH}_3$ ), 31.87 (*t*-Bu  $\underline{\text{C}}\text{CH}_3$ ), 31.83 (*t*-Bu  $\underline{\text{C}}\text{CH}_3$ ), 28.2 – 28.0 (4x aliphatic  $\underline{\text{CH}}_2$ ), 25.02 (NHCOCH $\underline{2}\underline{\text{CH}}_2$ ). ESI-ICR (+): solvent ~ 0.01% DMSO:methanol,  $m/z$  of  $[\text{M}+\text{H}]^+$  calculated for C<sub>55</sub>H<sub>75</sub>N<sub>6</sub>O<sub>3</sub>, 867.58560 found 867.58949.

Data for **MC013**. <sup>1</sup>H NMR (700.1 MHz, DMSO-d<sub>6</sub>, +25 °C)  $\delta$ : 10.08 (s, 2H, carb. NH), 9.97 (s, 2H, amide NH), 8.82 (s, 2H, urea NH), 7.95 (s, 2H, CH-5), 7.93 (s, 2H, CH-4), 7.82 (s, 2H, CH-7), 7.68 (s, 2H, CH-2), 2.47 – 2.40 (m, 4H, NHCOCH $\underline{2}$ ), 1.70 – 1.60 (m, 4H, NHCOCH $\underline{2}\underline{\text{CH}}_2$ ), 1.40 (s, 36H, *t*-Bu CH $\underline{3}$ ), 1.34 – 1.17 (m, 18H, aliphatic CH $\underline{2}$ ). <sup>13</sup>C NMR (176.0 MHz, DMSO-d<sub>6</sub>, +25 °C)  $\delta$ : 171.36 (amide  $\underline{\text{CO}}$ ), 153.97 (urea  $\underline{\text{CO}}$ ), 141.79 ( $\underline{\text{C}}3/\underline{\text{C}}6$ ), 141.63 ( $\underline{\text{C}}3/\underline{\text{C}}6$ ), 131.26 ( $\underline{\text{C}}12$ ), 129.99 ( $\underline{\text{C}}9$ ), 124.53 ( $\underline{\text{C}}10$ ), 124.12 ( $\underline{\text{C}}11$ ), 123.06 ( $\underline{\text{C}}1$ ), 122.81 ( $\underline{\text{C}}8$ ), 116.96 ( $\underline{\text{C}}2$ ), 115.68 ( $\underline{\text{C}}7$ ), 112.28 ( $\underline{\text{C}}5$ ), 111.76 ( $\underline{\text{C}}4$ ), 35.94 (NHCOCH $\underline{2}$ ), 34.48 (*t*-Bu  $\underline{\text{C}}\text{CH}_3$ ), 34.46 (*t*-Bu  $\underline{\text{C}}\text{CH}_3$ ), 31.88 (*t*-Bu  $\underline{\text{C}}\text{CH}_3$ ), 31.84 (*t*-Bu  $\underline{\text{C}}\text{CH}_3$ ), 28.3 – 28.1 (5x aliphatic  $\underline{\text{CH}}_2$ ), 24.81 (NHCOCH $\underline{2}\underline{\text{CH}}_2$ ). ESI-ICR (+): solvent ~ 0.01% DMSO:methanol,  $m/z$  of  $[\text{M}+\text{H}]^+$  calculated for C<sub>56</sub>H<sub>77</sub>N<sub>6</sub>O<sub>3</sub>, 881.60125 found 881.60474.

Data for **MC014**. <sup>1</sup>H NMR (700.1 MHz, DMSO-d<sub>6</sub>, +25 °C)  $\delta$ : 10.08 (s, 2H, carb. NH), 9.96 (s, 2H, amide NH), 8.83 (s, 2H, urea NH), 7.95 (s, 2H, CH-5), 7.92 (s, 2H, CH-4), 7.79 (s, 2H,

CH-7), 7.68 (s, 2H, CH-2), 2.47 – 2.40 (m, 4H, NHCOCH<sub>2</sub>), 1.70 – 1.60 (m, 4H, NHCOCH<sub>2</sub>CH<sub>2</sub>), 1.41 (s, 36H, *t*-Bu CH<sub>3</sub>), 1.34 – 1.15 (m, 20H, aliphatic CH<sub>2</sub>). <sup>13</sup>C NMR (176.0 MHz, DMSO-d<sub>6</sub>, +25 °C) δ: 171.35 (amide CO), 153.89 (urea CO), 141.78 (C3/C6), 141.60 (C3/C6), 131.18 (C-12), 130.09 (C-9), 124.53 (C-10), 124.13 (C-11), 123.03 (C-1), 122.75 (C-8), 116.84 (C-2), 115.78 (C-7), 112.26 (C-5), 111.67 (C-4), 36.00 (NHCOCH<sub>2</sub>), 34.45 (*t*-Bu CCH<sub>3</sub>), 34.41 (*t*-Bu CCH<sub>3</sub>), 31.84 (*t*-Bu CCH<sub>3</sub>), 31.81 (*t*-Bu CCH<sub>3</sub>), 28.3 – 28.0 (5x aliphatic CH<sub>2</sub>), 24.95 (NHCOCH<sub>2</sub>CH<sub>2</sub>). ESI-ICR (+): solvent ~ 0.01% DMSO:methanol, *m/z* of [M+H]<sup>+</sup> calculated for C<sub>57</sub>H<sub>79</sub>N<sub>6</sub>O<sub>3</sub>, 895.61690 found 895.62076.

## References

- (1) Suu, A.; Jalukse, L.; Liigand, J.; Kruve, A.; Himmel, D.; Krossing, I.; Rosés, M.; Leito, I. *Anal. Chem.* **2015**, 87 (5), 2623–2630. doi:10.1021/ac504692m
- (2) Peets, P.; Vahur, S.; Kruve, A.; Haljasorg, T.; Herodes, K.; Pagano, T.; Leito, I. *J. Cult. Herit.* **2019**. doi:10.1016/j.culher.2019.09.002
- (3) Teearu, A.; Vahur, S.; Rodima, T.; Herodes, K.; Bonrath, W.; Netscher, T.; Tshepelevitsh, S.; Trummal, A.; Lõkov, M.; Leito, I. *J. Mass Spectrom.* **2017**, 52 (9), 603–617. doi:10.1002/jms.3943
- (4) Kadam, S. A.; Haav, K.; Toom, L.; Haljasorg, T.; Leito, I. *J. Org. Chem.* **2014**, 79 (6), 2501–2513. doi:10.1021/jo4027963
- (5) Kadam, S. A.; Martin, K.; Haav, K.; Toom, L.; Mayeux, C.; Pung, A.; Gale, P. A.; Hiscock, J. R.; Brooks, S. J.; Kirby, I. L.; Busschaert, N.; Leito, I. *Chem. - Eur. J.* **2015**, 21 (13), 5145–5160. doi:10.1002/chem.201405858
- (6) Martin, K.; Nõges, J.; Haav, K.; Kadam, S. A.; Pung, A.; Leito, I. *Eur. J. Org. Chem.* **2017**, 2017 (35), 5231–5237. doi:10.1002/ejoc.201700931
- (7) Liu, Y.; Nishiura, M.; Wang, Y.; Hou, Z. *J. Am. Chem. Soc.* **2006**, 128 (17), 5592–5593. doi:10.1021/ja058188f
- (8) Sanchez, G.; Espinosa, A.; Curiel, D.; Tarraga, A.; Molina, P. *J. Org. Chem.* **2013**, 78 (19), 9725–9737. doi:10.1021/jo401430d
- (9) Gibson, V. C.; Spitzmesser, S. K.; White, A. J. P.; Williams, D. J. *Dalton Trans.* **2003**, No. 13, 2718. doi:10.1039/b301902k
- (10) Jung, H. S.; Yun, T.; Cho, Y.; Jeon, H. B. *Tetrahedron* **2016**, 72 (40), 5988–5993. doi:10.1016/j.tet.2016.07.021

<sup>1</sup>H NMR spectrum (700.1 MHz) of compound **CZ016**

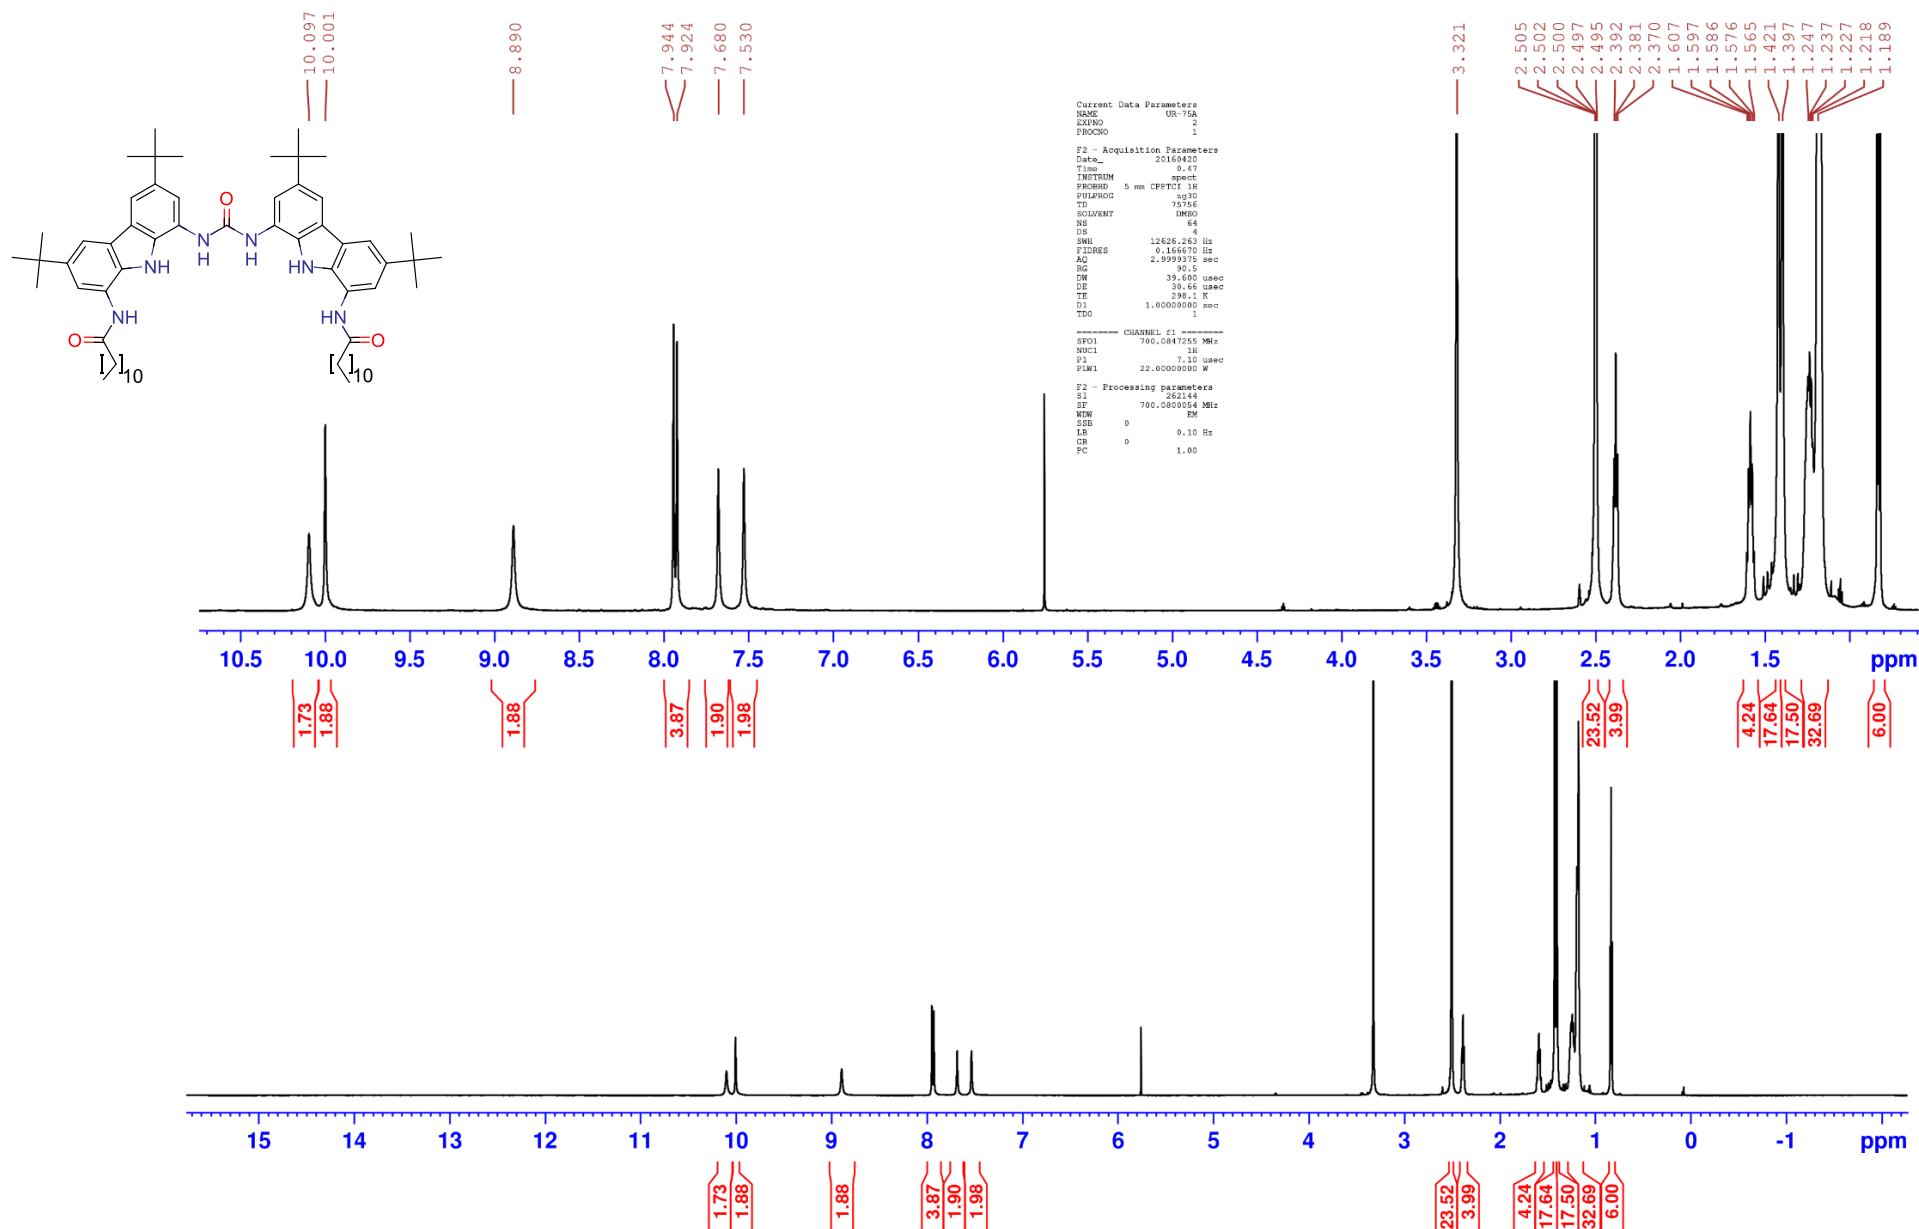

<sup>13</sup>C NMR spectrum (700.1 MHz) of compound **CZ016**

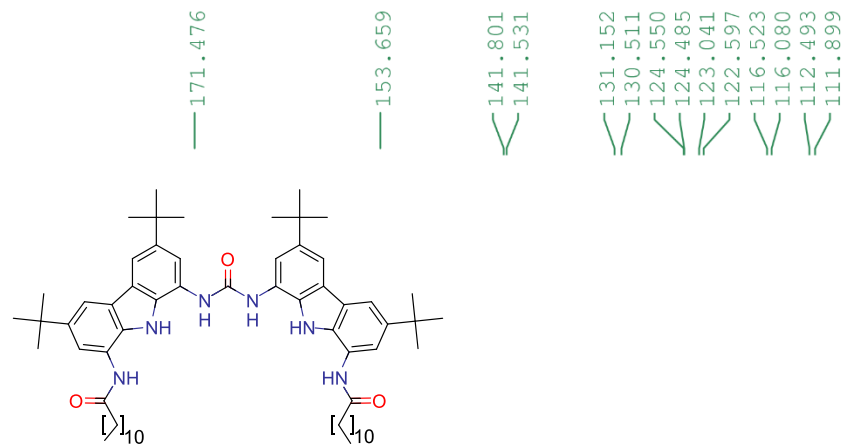

Current Data Parameters  
NAME UR-75A  
EXPNO 1  
PROCNO 1

F2 - Acquisition Parameters  
Date\_ 20160419  
Time 22.00  
INSTRUM spect  
PROBHD 5 mm CPPTCI 1H  
PULPROG zgpg30  
TD 131072  
SOLVENT DMSO  
NS 5000  
DS 4  
SWH 41666.668 Hz  
FIDRES 0.317891 Hz  
AQ 1.572841 sec  
RG 2050  
DW 12.000 usec  
DE 19.12 usec  
TE 298.2 K  
D1 2.00000000 sec  
D11 0.03000000 sec  
TD0 1

===== CHANNEL f1 =====  
SFO1 176.0537397 MHz  
NUC1 13C  
P1 12.40 usec  
PLW1 198.00000000 W

===== CHANNEL f2 =====  
SFO2 700.0828003 MHz  
NUC2 1H  
CPDPRG[2] waltz16  
PCPD2 65.00 usec  
PLW2 22.00000000 W  
PLW12 0.26249000 W  
PLW13 0.11090000 W

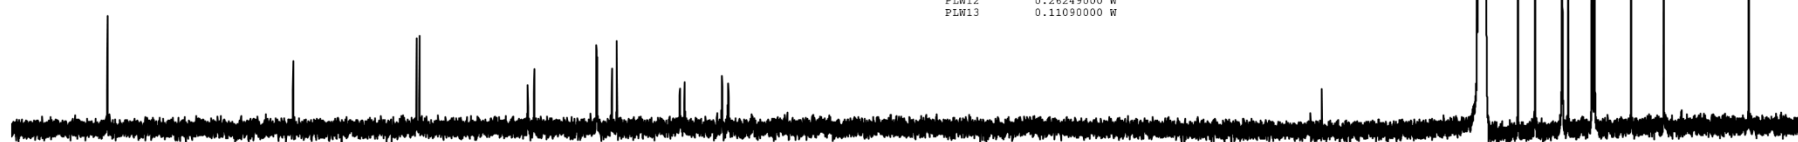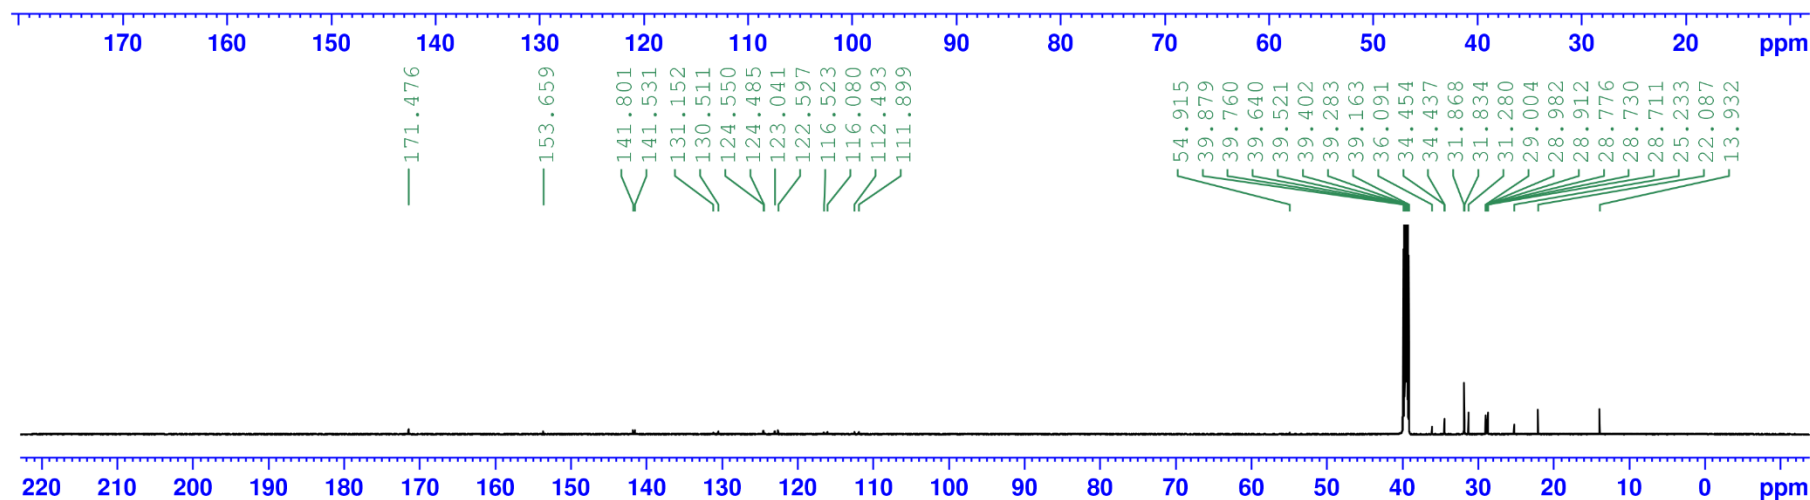



$^1\text{H}$ - $^{13}\text{C}$  HSQC spectrum (700.1 MHz) of compound **CZ016**

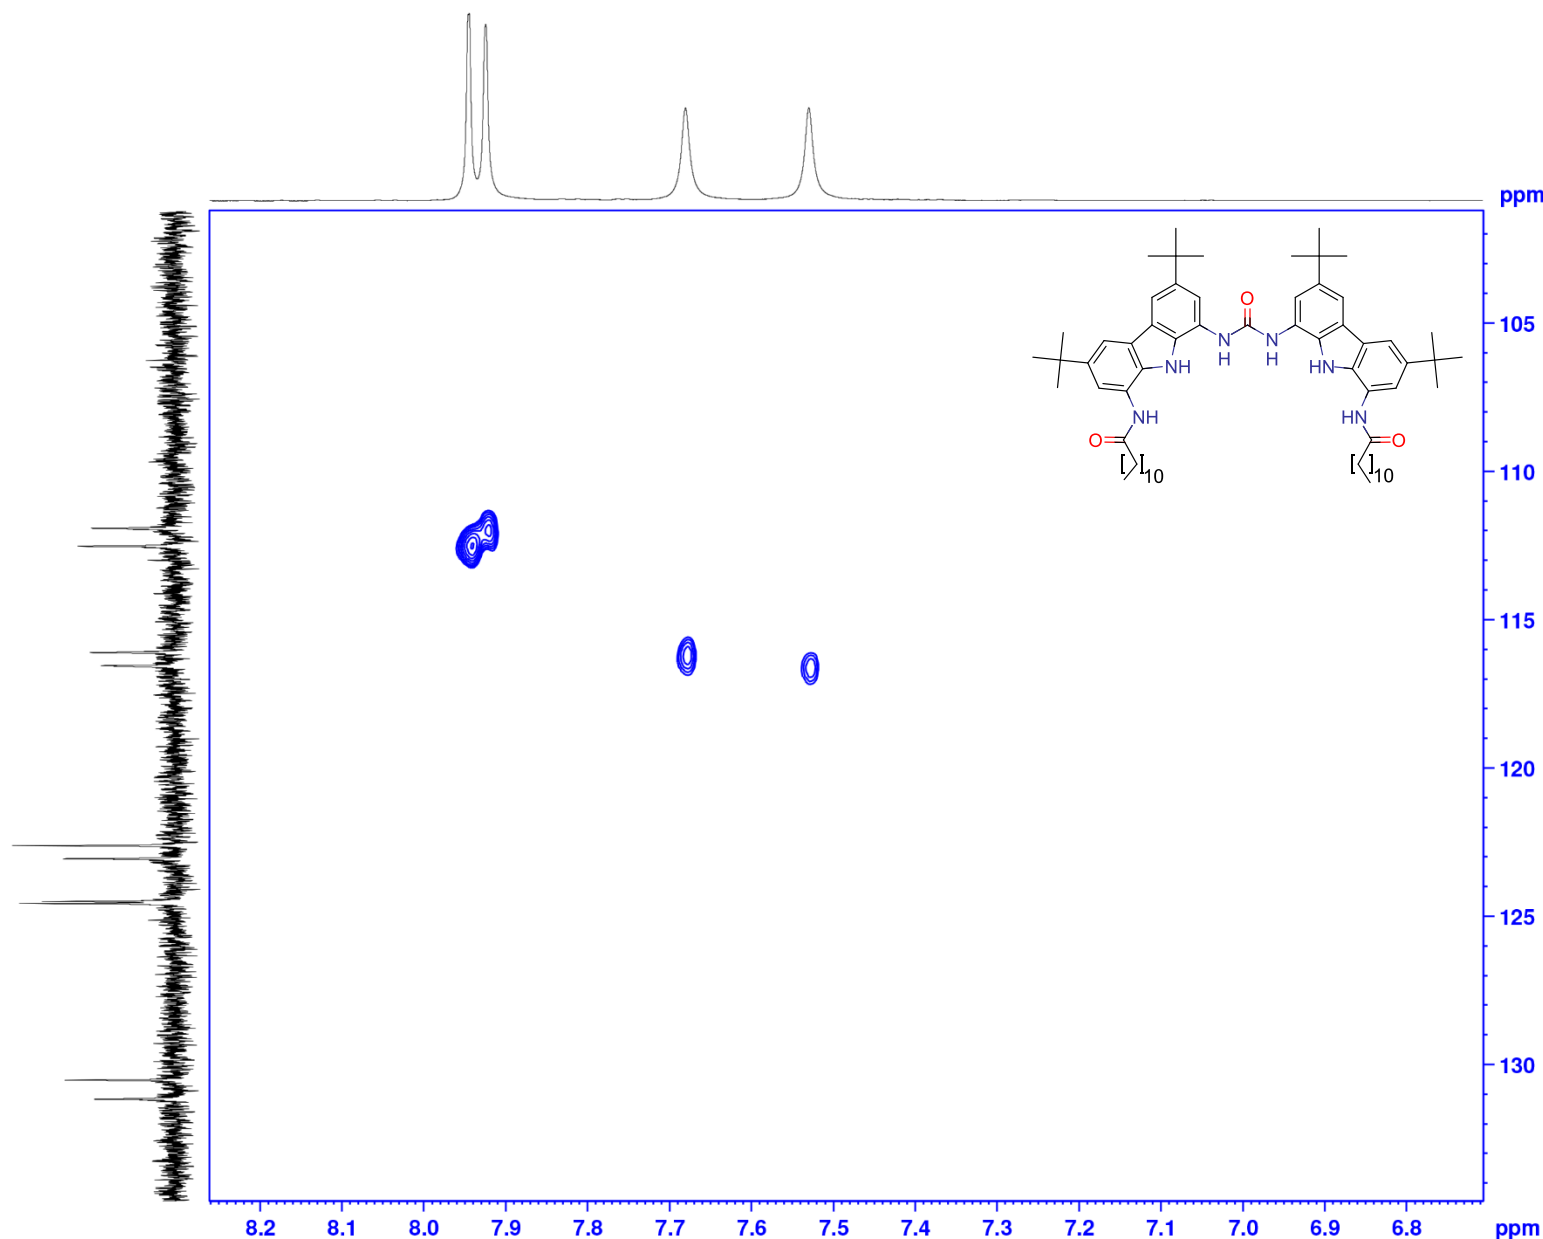

Current Data Parameters  
NAME UR-75A  
EXPNO 7  
PROCNO 1

F2 - Acquisition Parameters  
Date\_ 20160420  
Time 7.47  
INSTRUM spect  
PROBHD 5 mm CPPTCI 1H  
PULPROG hsqcetdtpasp2.3  
TD 1536  
SOLVENT DMSO  
NS 16  
DS 32  
SWH 7692.308 Hz  
FIDRES 5.008013 Hz  
AQ 0.0998400 sec  
RG 90.5  
DW 65.000 usec  
DE 25.00 usec  
TE 298.1 K  
CNST2 145.0000000  
CNST17 -0.5000000  
D0 0.00000300 sec  
D1 1.50000000 sec  
D4 0.00172414 sec  
D11 0.03000000 sec  
D16 0.00020000 sec  
D21 0.00360000 sec  
D24 0.00089000 sec  
IN0 0.00001670 sec

\*\*\*\*\* CHANNEL f1 \*\*\*\*\*  
SF01 700.0838154 MHz  
NUC1 1H  
P1 7.10 usec  
P2 14.20 usec  
P28 0 usec  
PLW1 22.00000000 W

\*\*\*\*\* CHANNEL f2 \*\*\*\*\*  
SF02 176.0519793 MHz  
NUC2 13C  
CPDPRG2 bl\_p5m4sp\_4sp.2  
P3 12.40 usec  
P14 500.00 usec  
P24 2000.00 usec  
P31 1600.00 usec  
P63 1500.00 usec  
PLW0 0 W  
PLW2 198.00000000 W  
PLW12 10.06400013 W  
SFOAL3 Crp60,0.5,20.1  
SFOAL3 0 Hz 0.500  
SFOFFS3 0 Hz  
SFW3 46.51599884 W  
SFOAL7 Crp60comp.4  
SFOAL7 0 Hz 0.500  
SFOFFS7 0 Hz  
SFW7 46.51599884 W  
SFOAL14 Crp42,1.5,20.2  
SFOAL14 0 Hz 0.500  
SFOFFS14 0 Hz  
SFW14 26.04899979 W  
SFOAL18 Crp60\_xfilt.2  
SFOAL18 0 Hz 0.500  
SFOFFS18 0 Hz  
SFW18 15.71700001 W  
SFOAL31 Crp42,1.5,20.2  
SFOAL31 0 Hz 0.500  
SFOFFS31 0 Hz  
SFW31 6.51219988 W

\*\*\*\*\* GRADIENT CHANNEL \*\*\*\*\*  
GPNAM[1] SMSQ10.100  
GPNAM[2] SMSQ10.100  
GPNAM[3] SMSQ10.100  
GPNAM[4] SMSQ10.100  
GPZ1 80.00 %  
GPZ2 20.10 %  
GPZ3 11.00 %  
GPZ4 -5.00 %  
P16 1000.00 usec  
P19 500.00 usec

F1 - Acquisition parameters  
TD 160  
SF01 176.052 MHz  
FIDRES 187.125748 Hz  
SW 170.064 ppm  
FnMODE Echo-Antiecho

F2 - Processing parameters  
SI 4096  
SF 700.0799971 MHz  
WDW QSINE  
SSB 2  
LB 0 Hz  
GB 0  
PC 1.40

F1 - Processing parameters

$^1\text{H}$ - $^{13}\text{C}$  HMBC spectrum (700.1 MHz) of compound **CZ016**

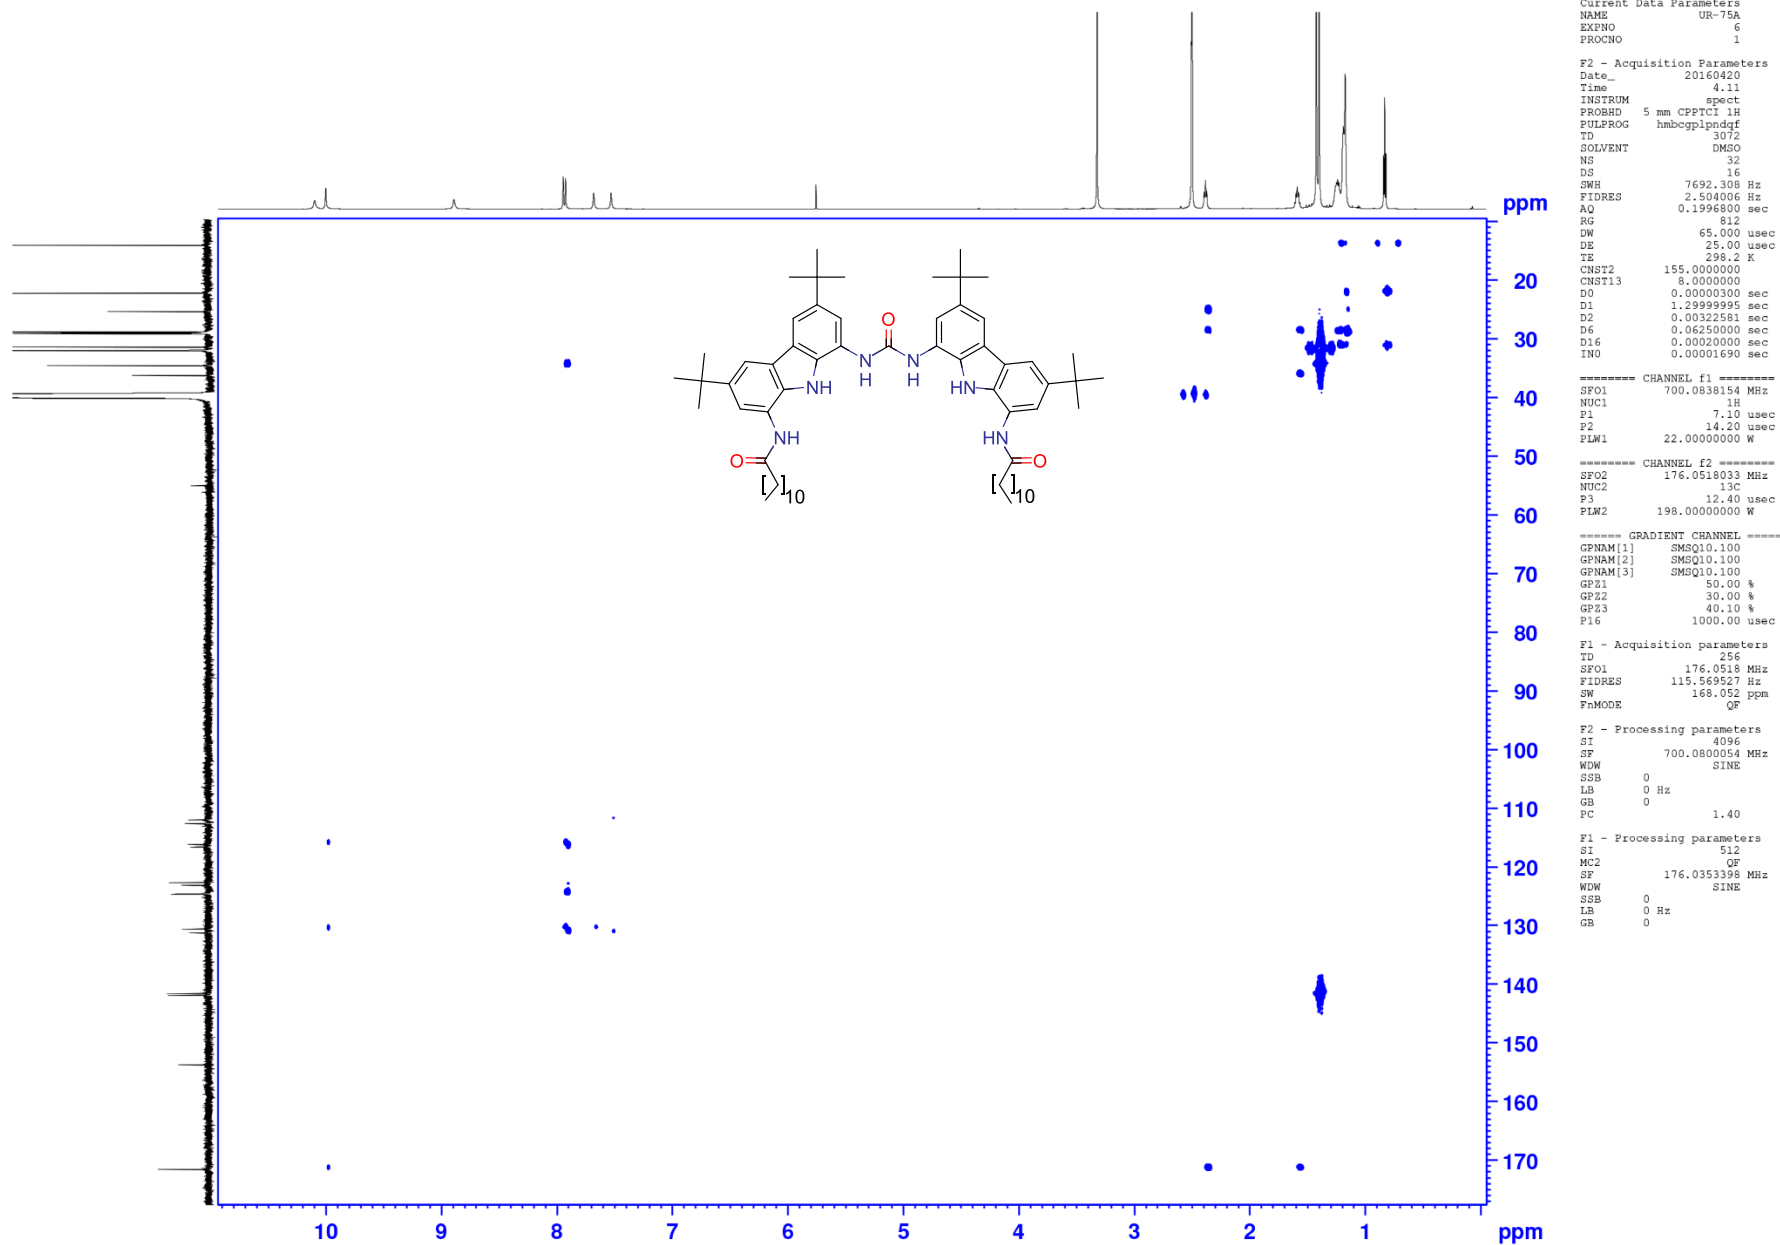

# HRMS spectrum of compound **CZ016**

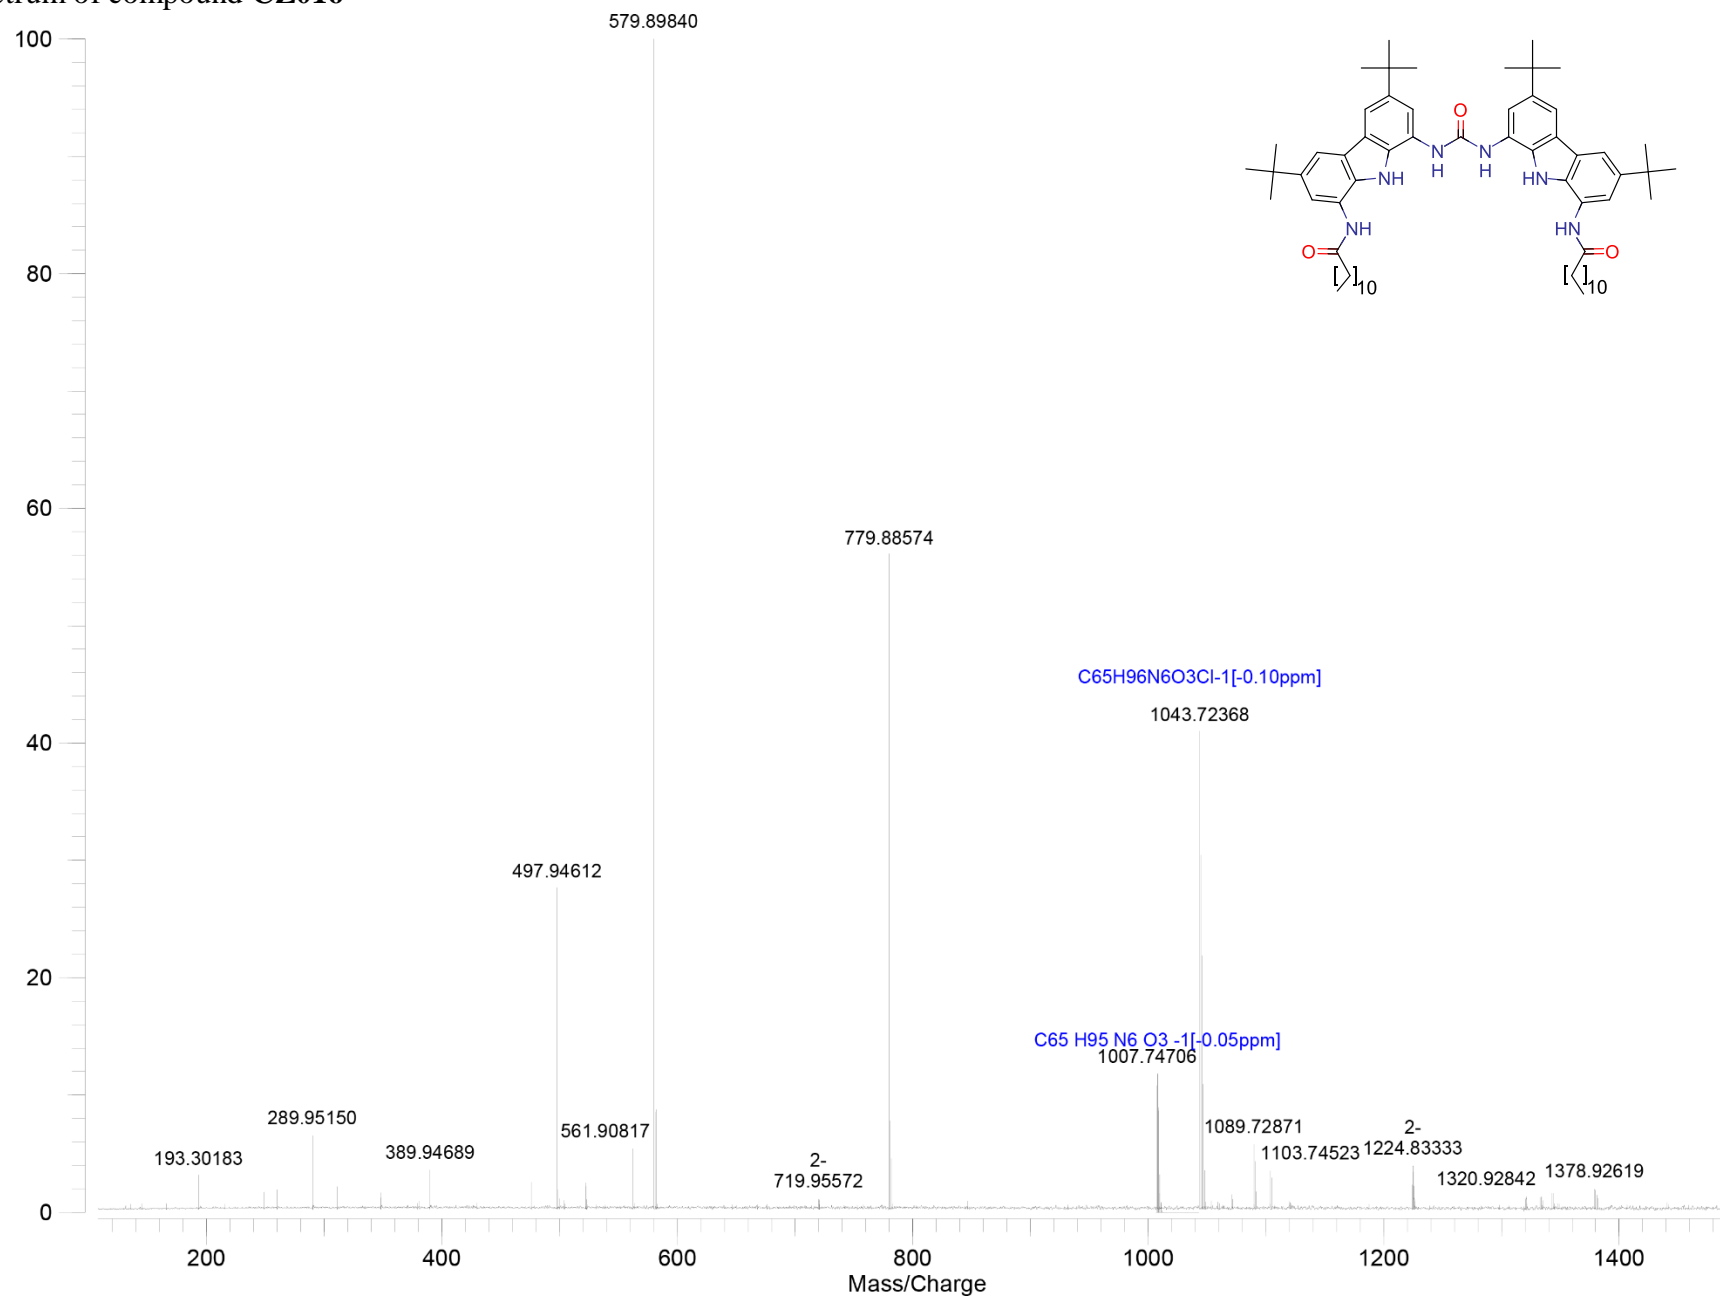

<sup>1</sup>H NMR spectrum (700.1 MHz) of compound **MC001**

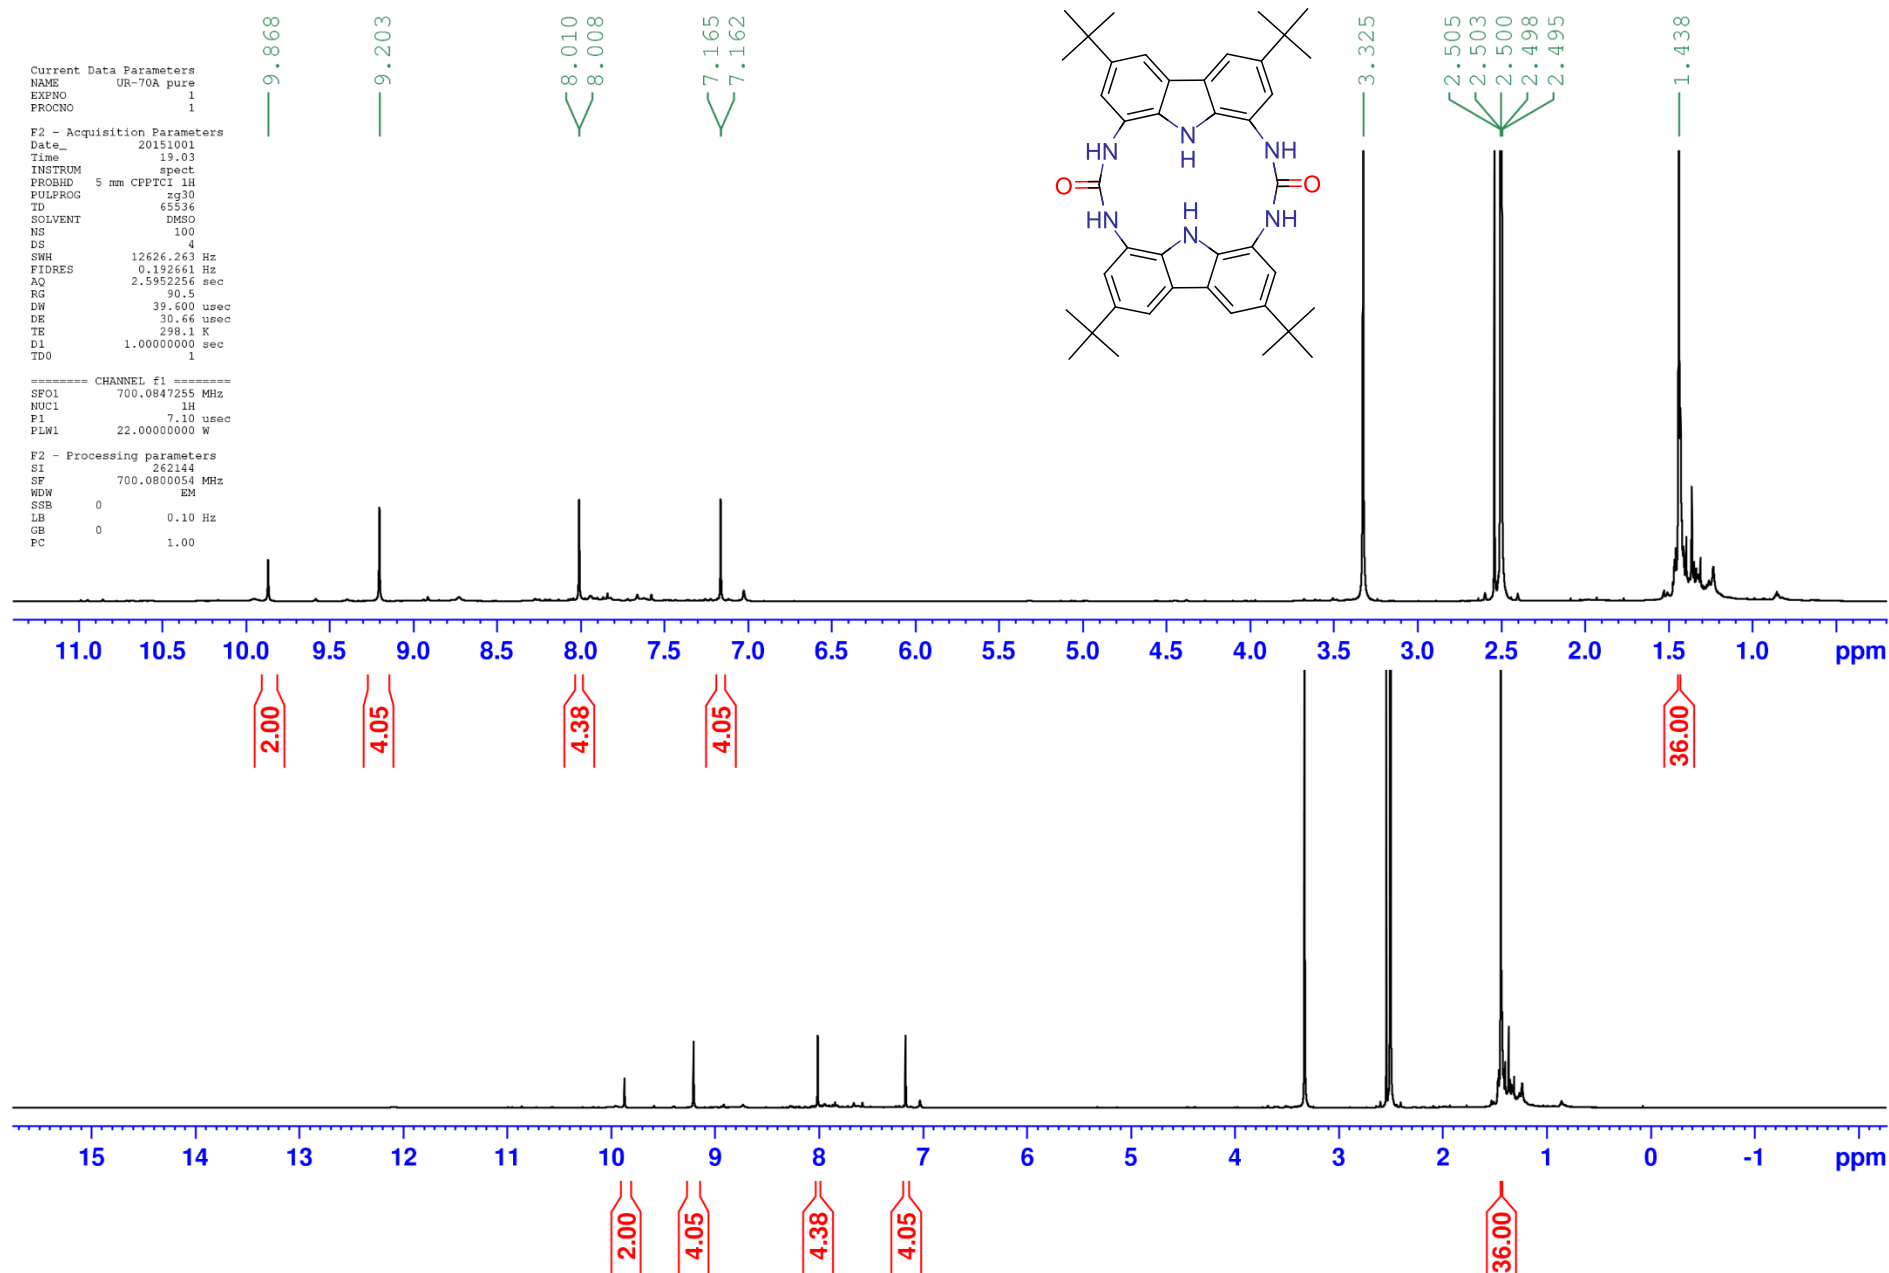

$^{13}\text{C}$  NMR spectrum (700.1 MHz) of compound **MC001**

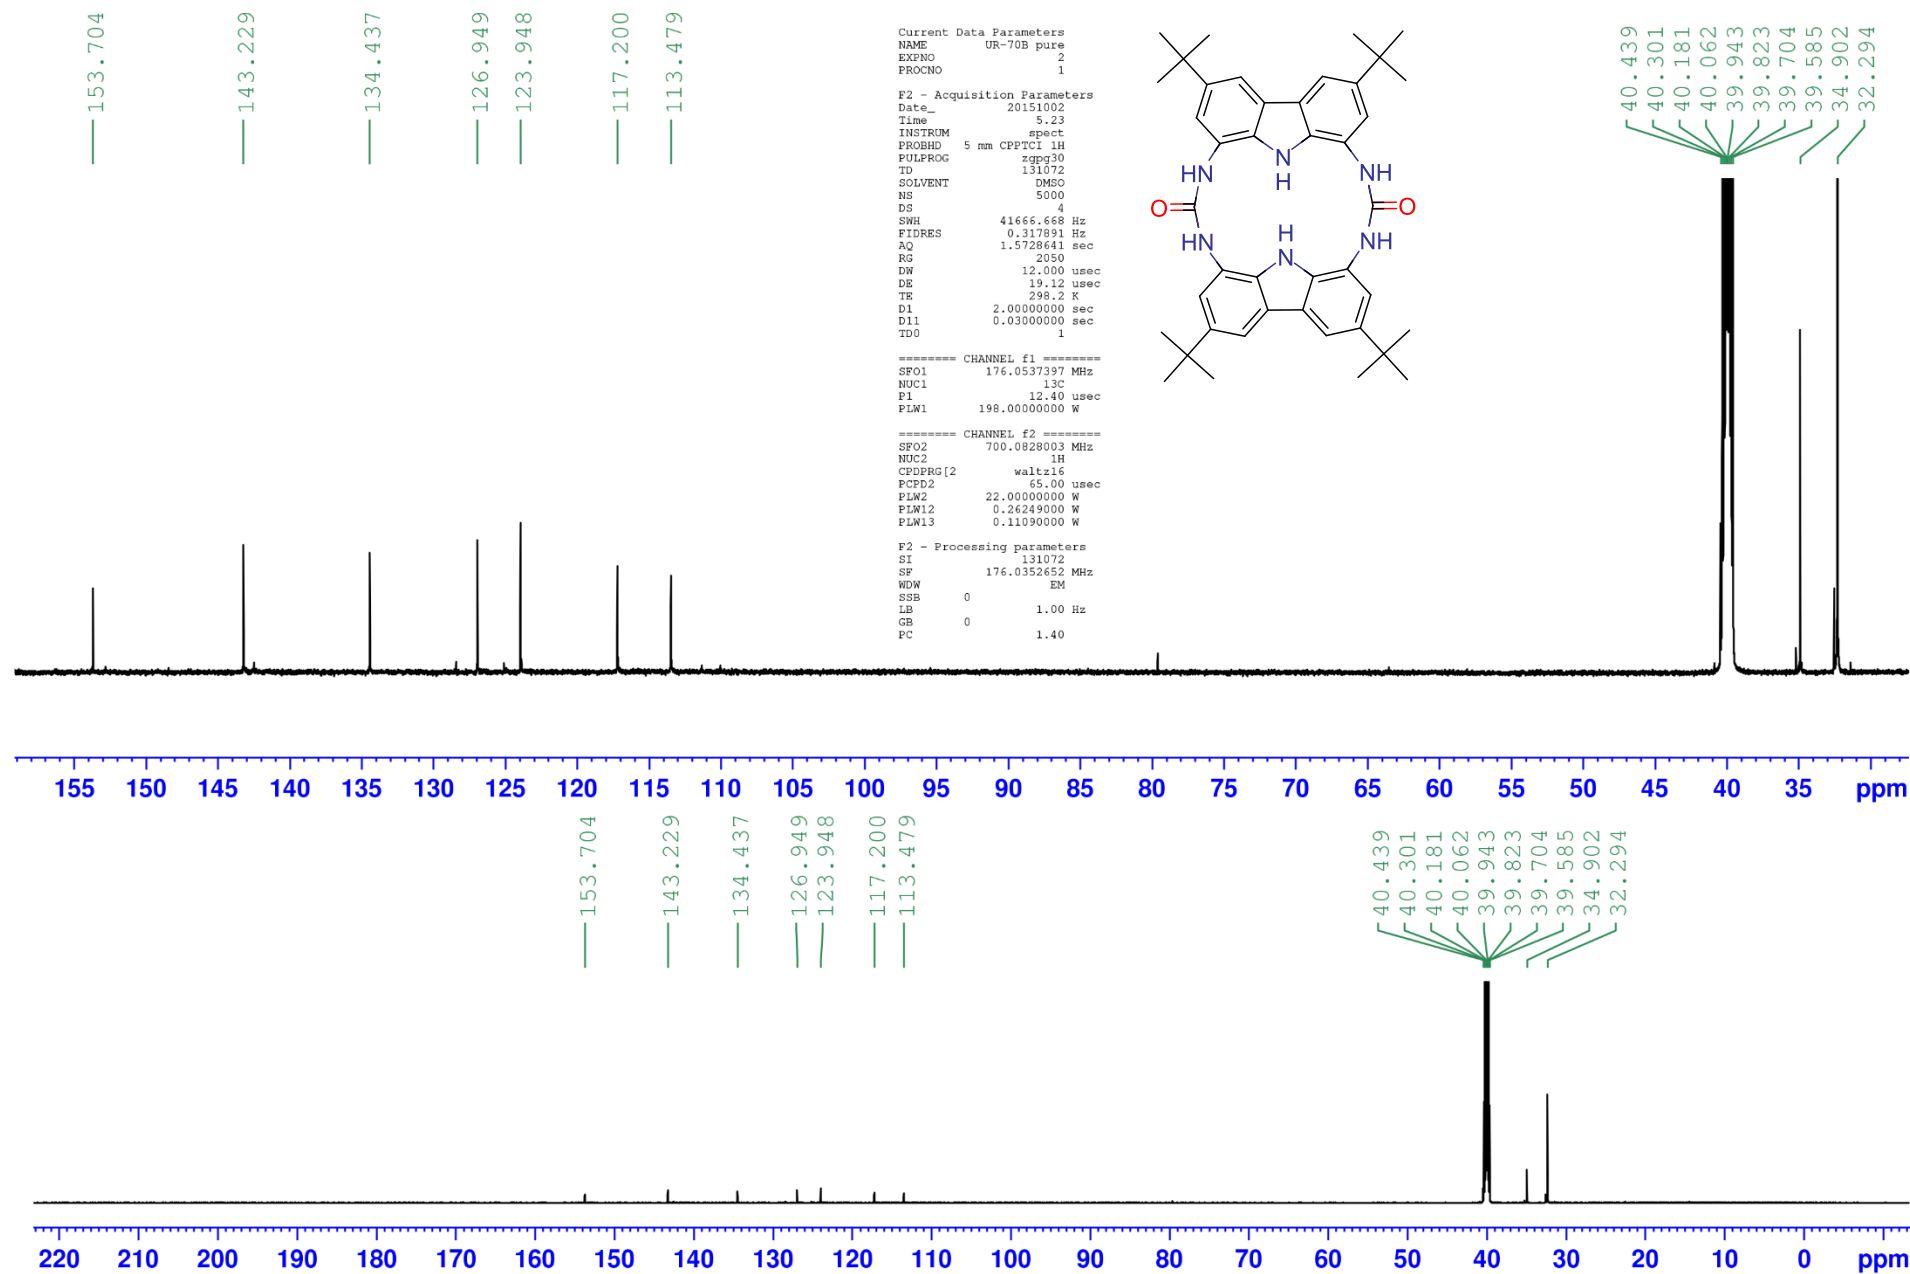

$^1\text{H}$ - $^{13}\text{C}$  HSQC spectrum (700.1 MHz) of compound **MC001**

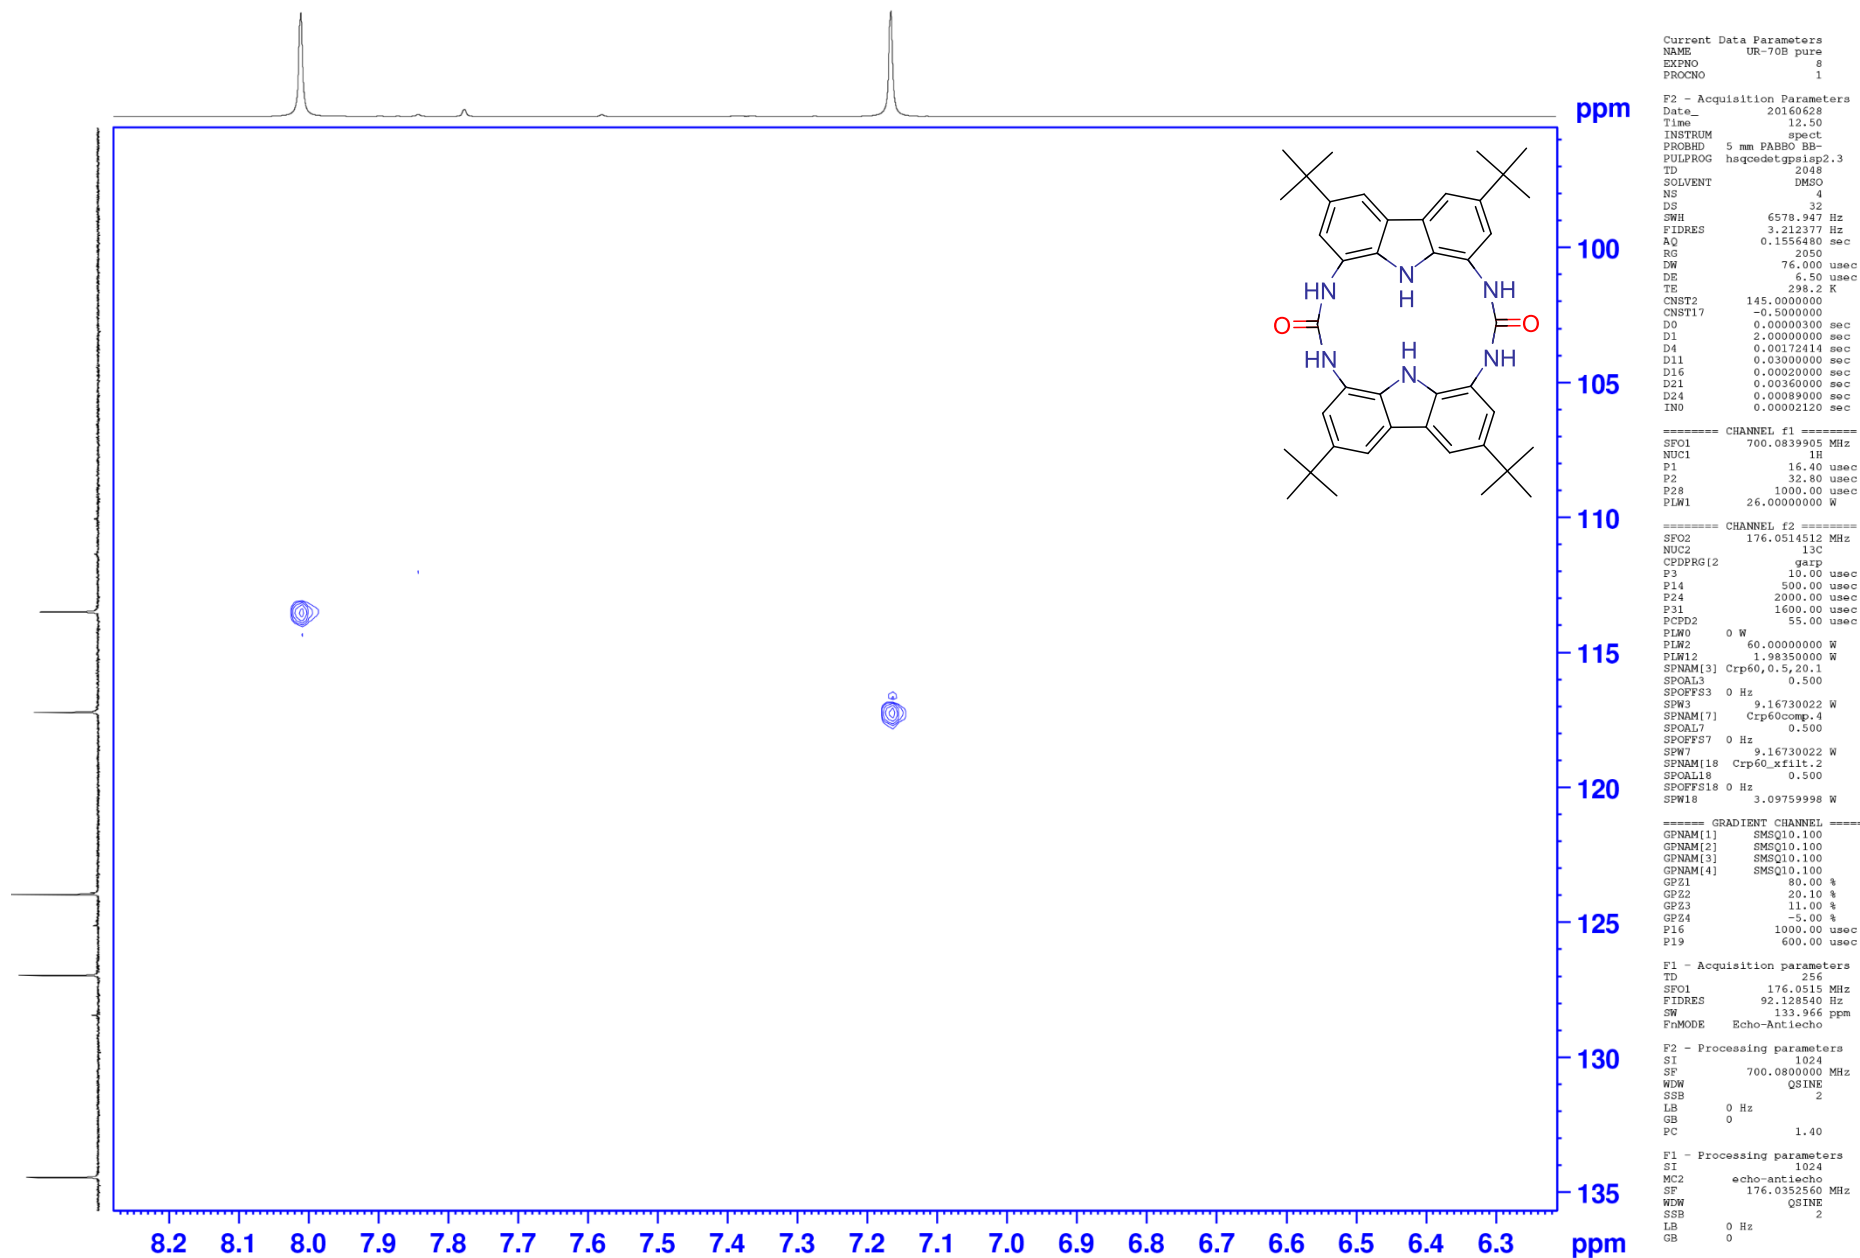

$^1\text{H}$ - $^{13}\text{C}$  HMBC spectrum (700.1 MHz) of compound **MC001**

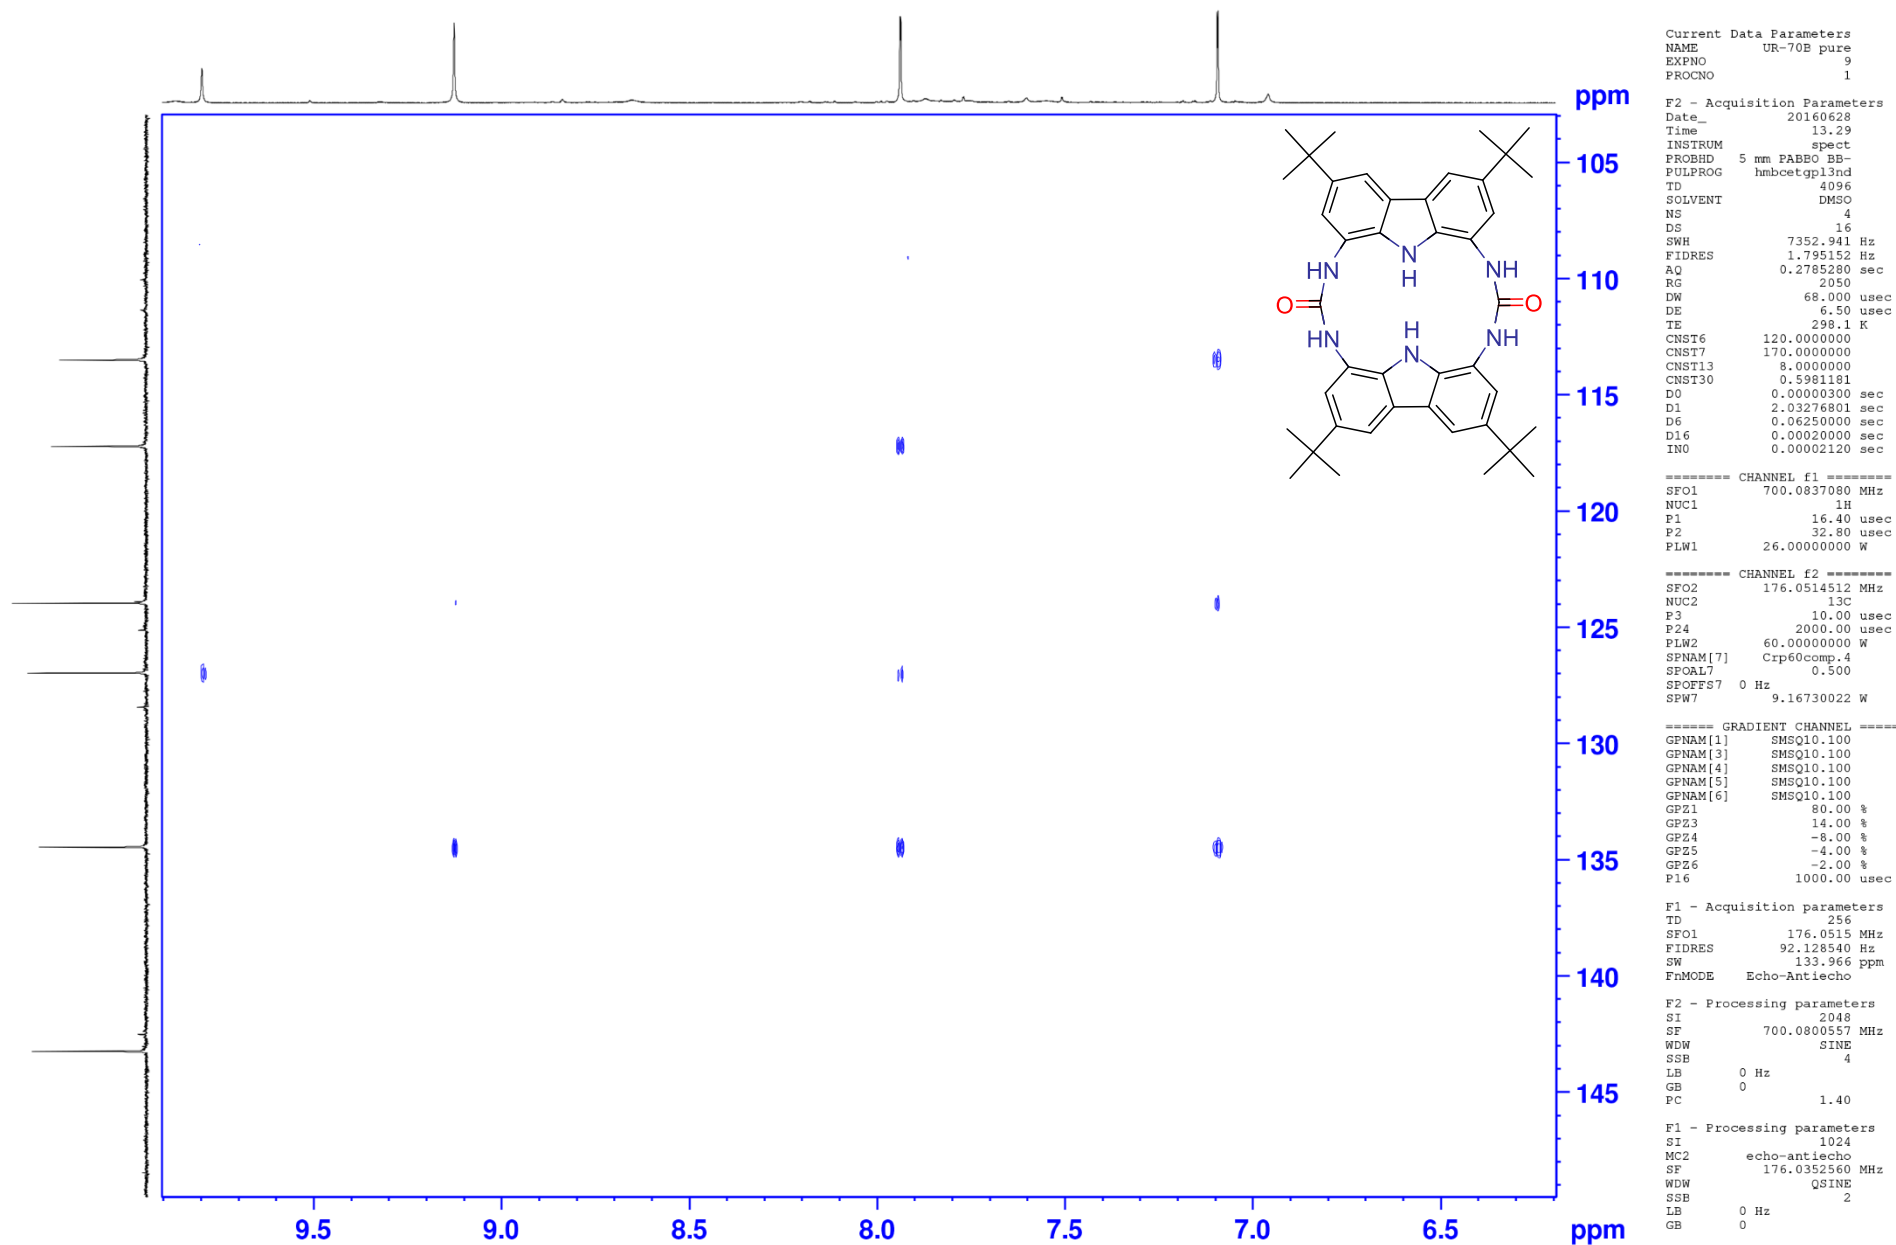

# HRMS spectrum of compound MC001

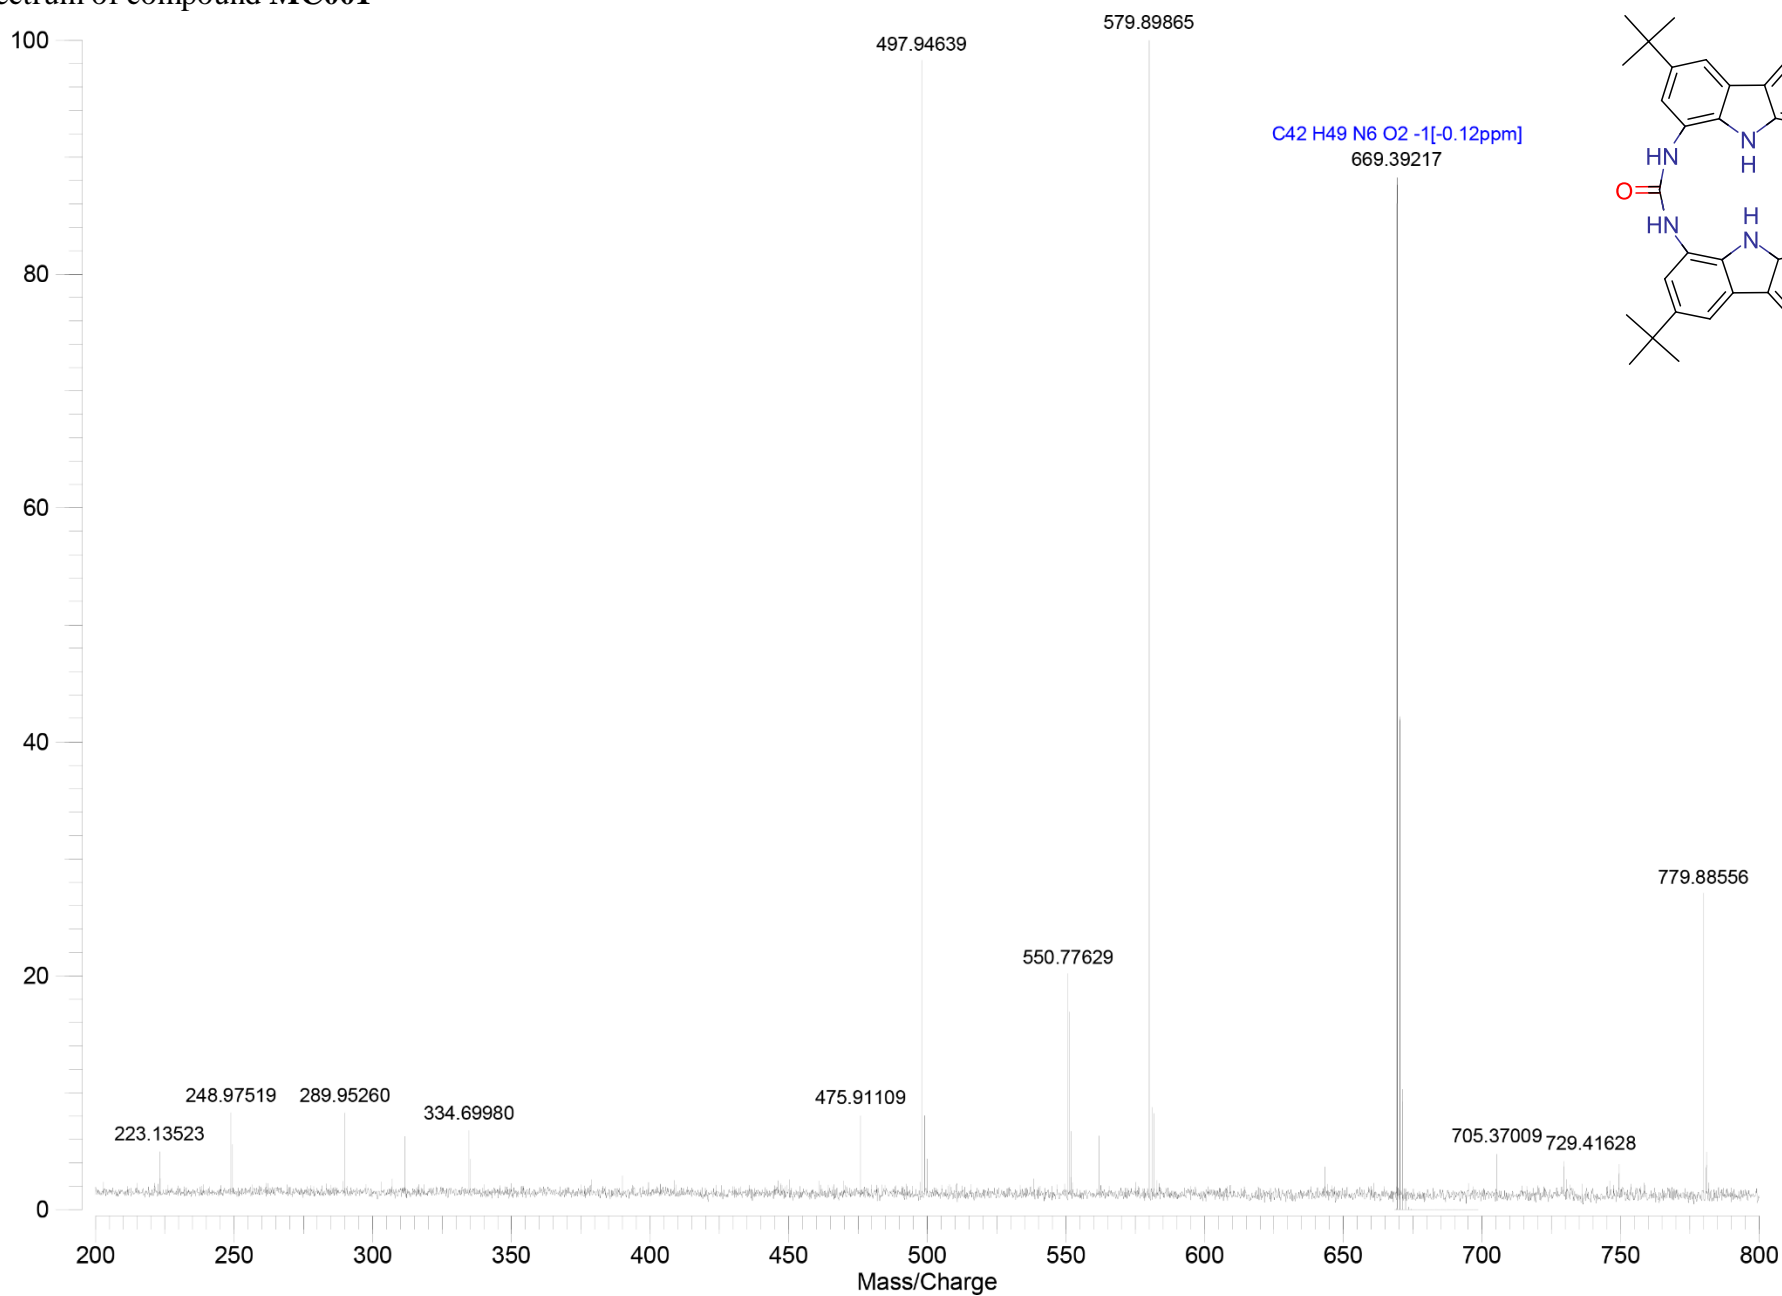



<sup>1</sup>H NMR spectrum (700.1 MHz) of compound **MC002**

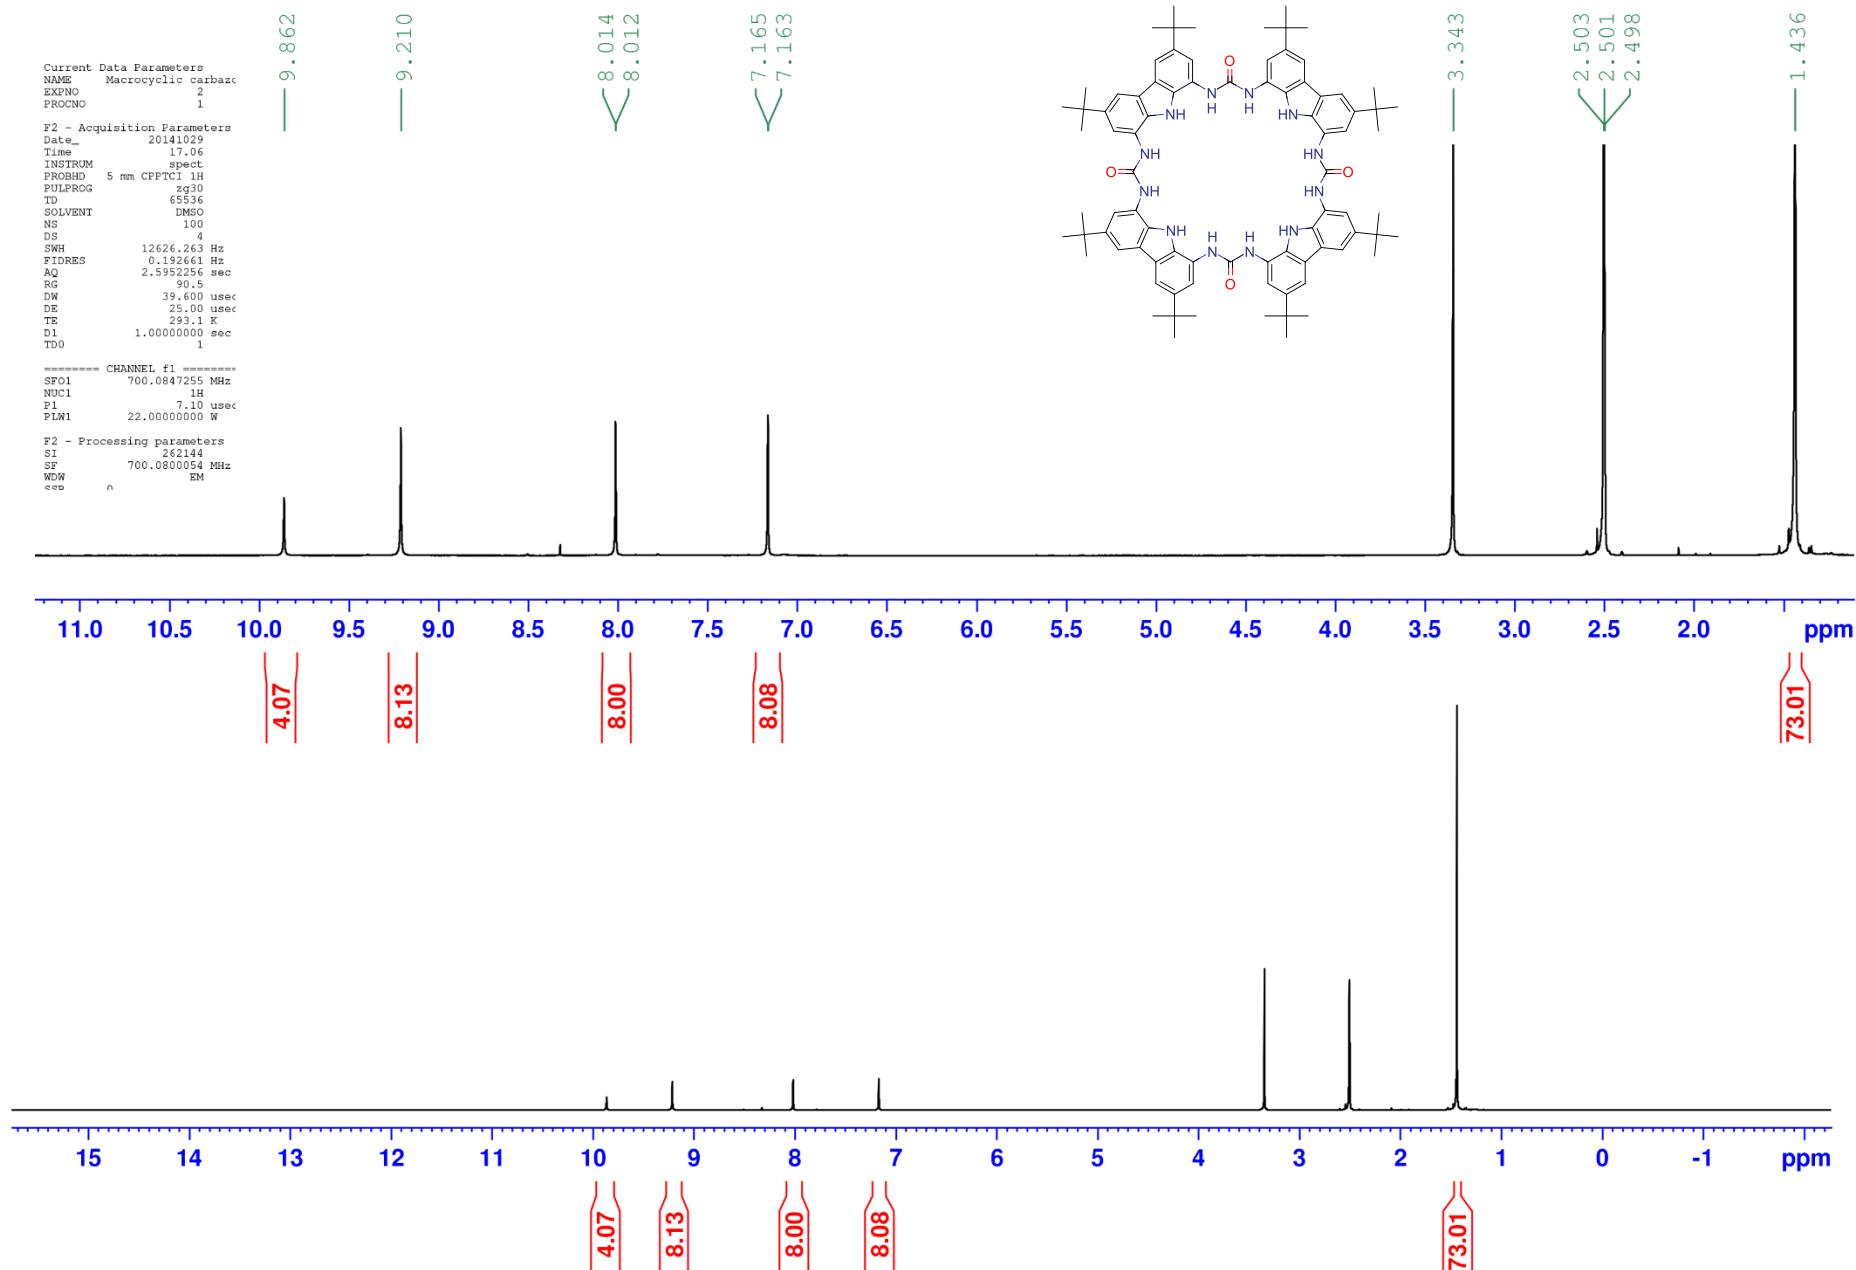

$^{13}\text{C}$  NMR spectrum (700.1 MHz) of compound **MC002**

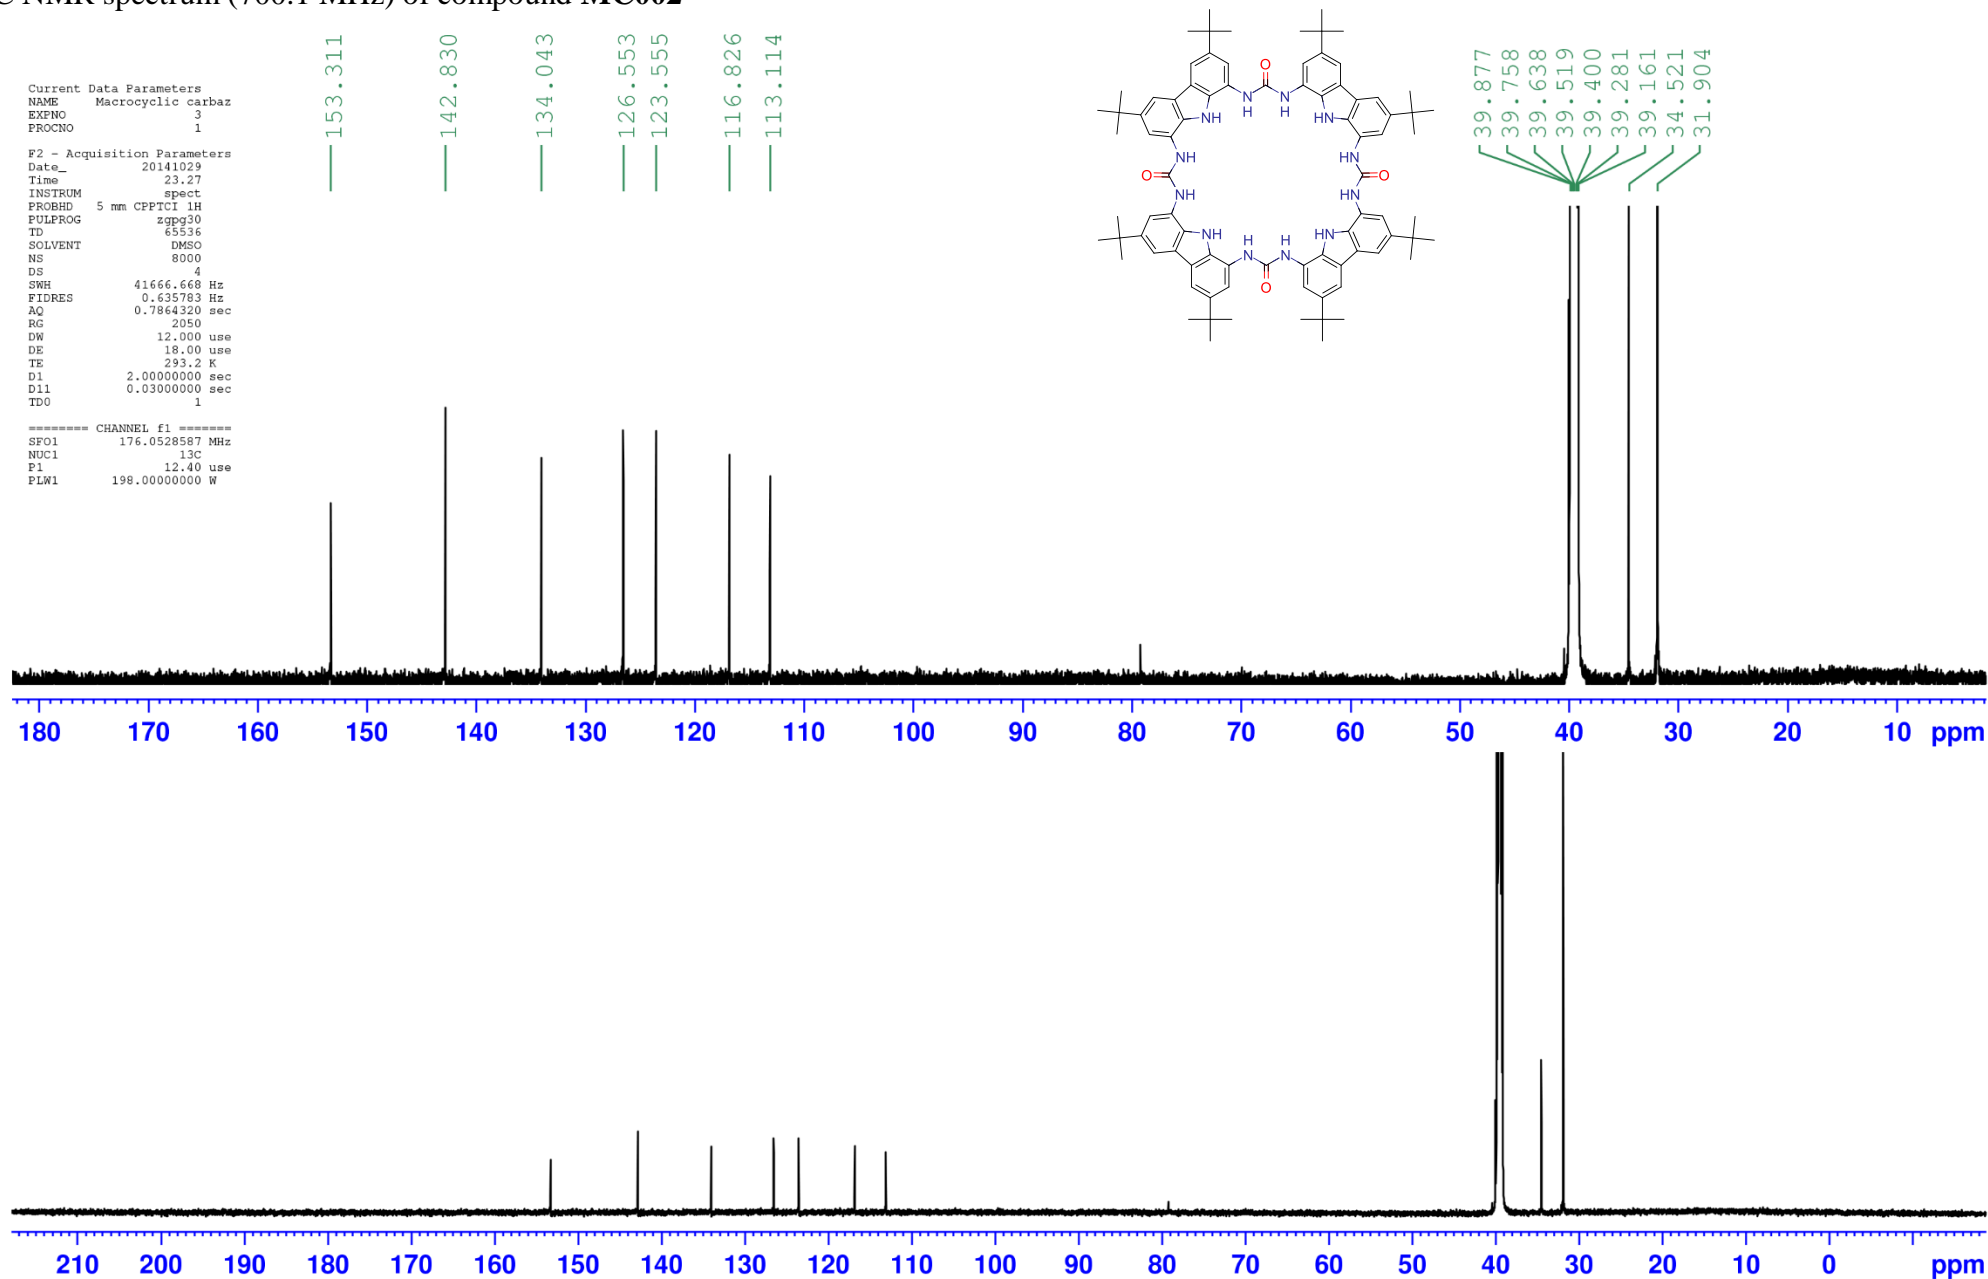

$^1\text{H}$ - $^{13}\text{C}$  HSQC spectrum (700.1 MHz) of compound **MC002**

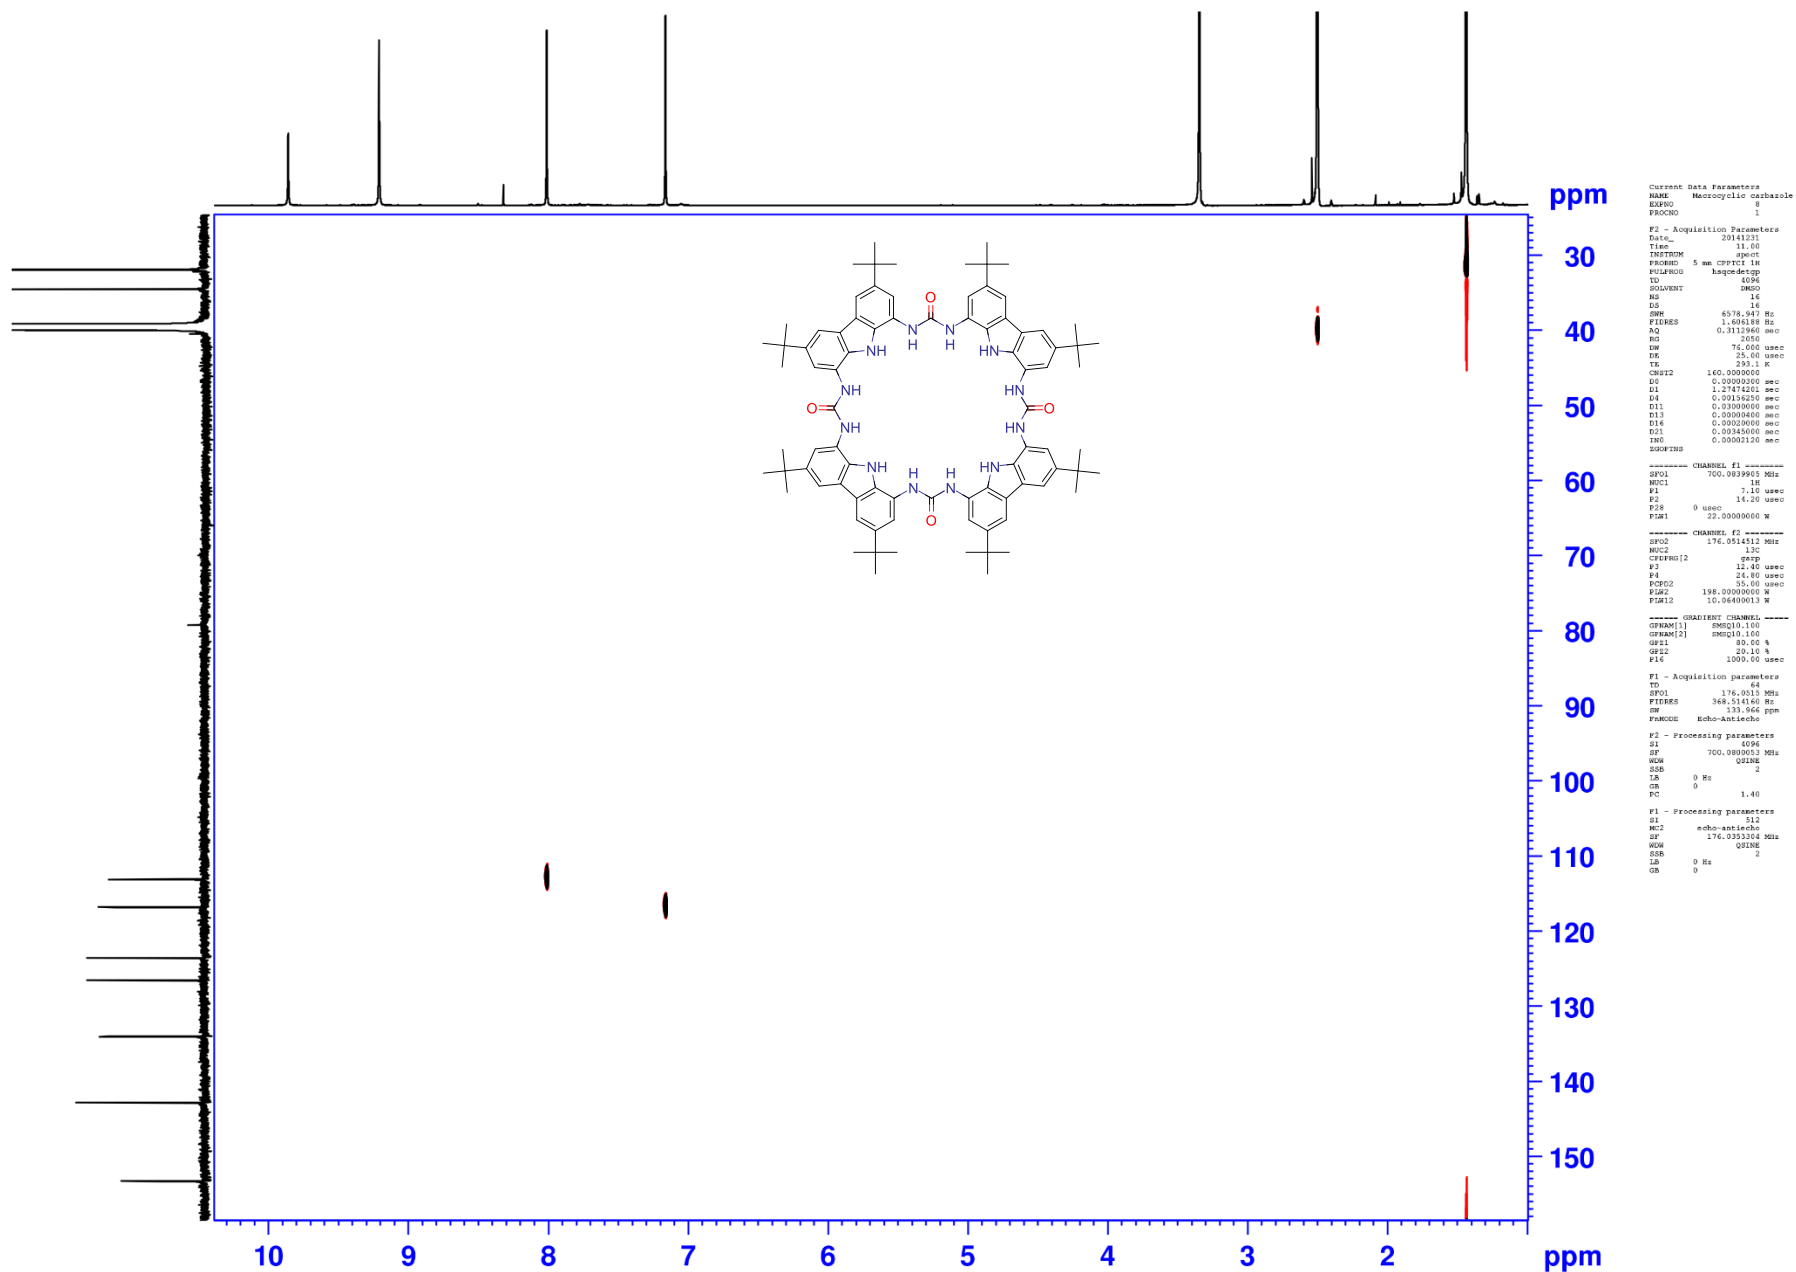

$^1\text{H}$ - $^{13}\text{C}$  HMBC spectrum (700.1 MHz) of compound **MC002**

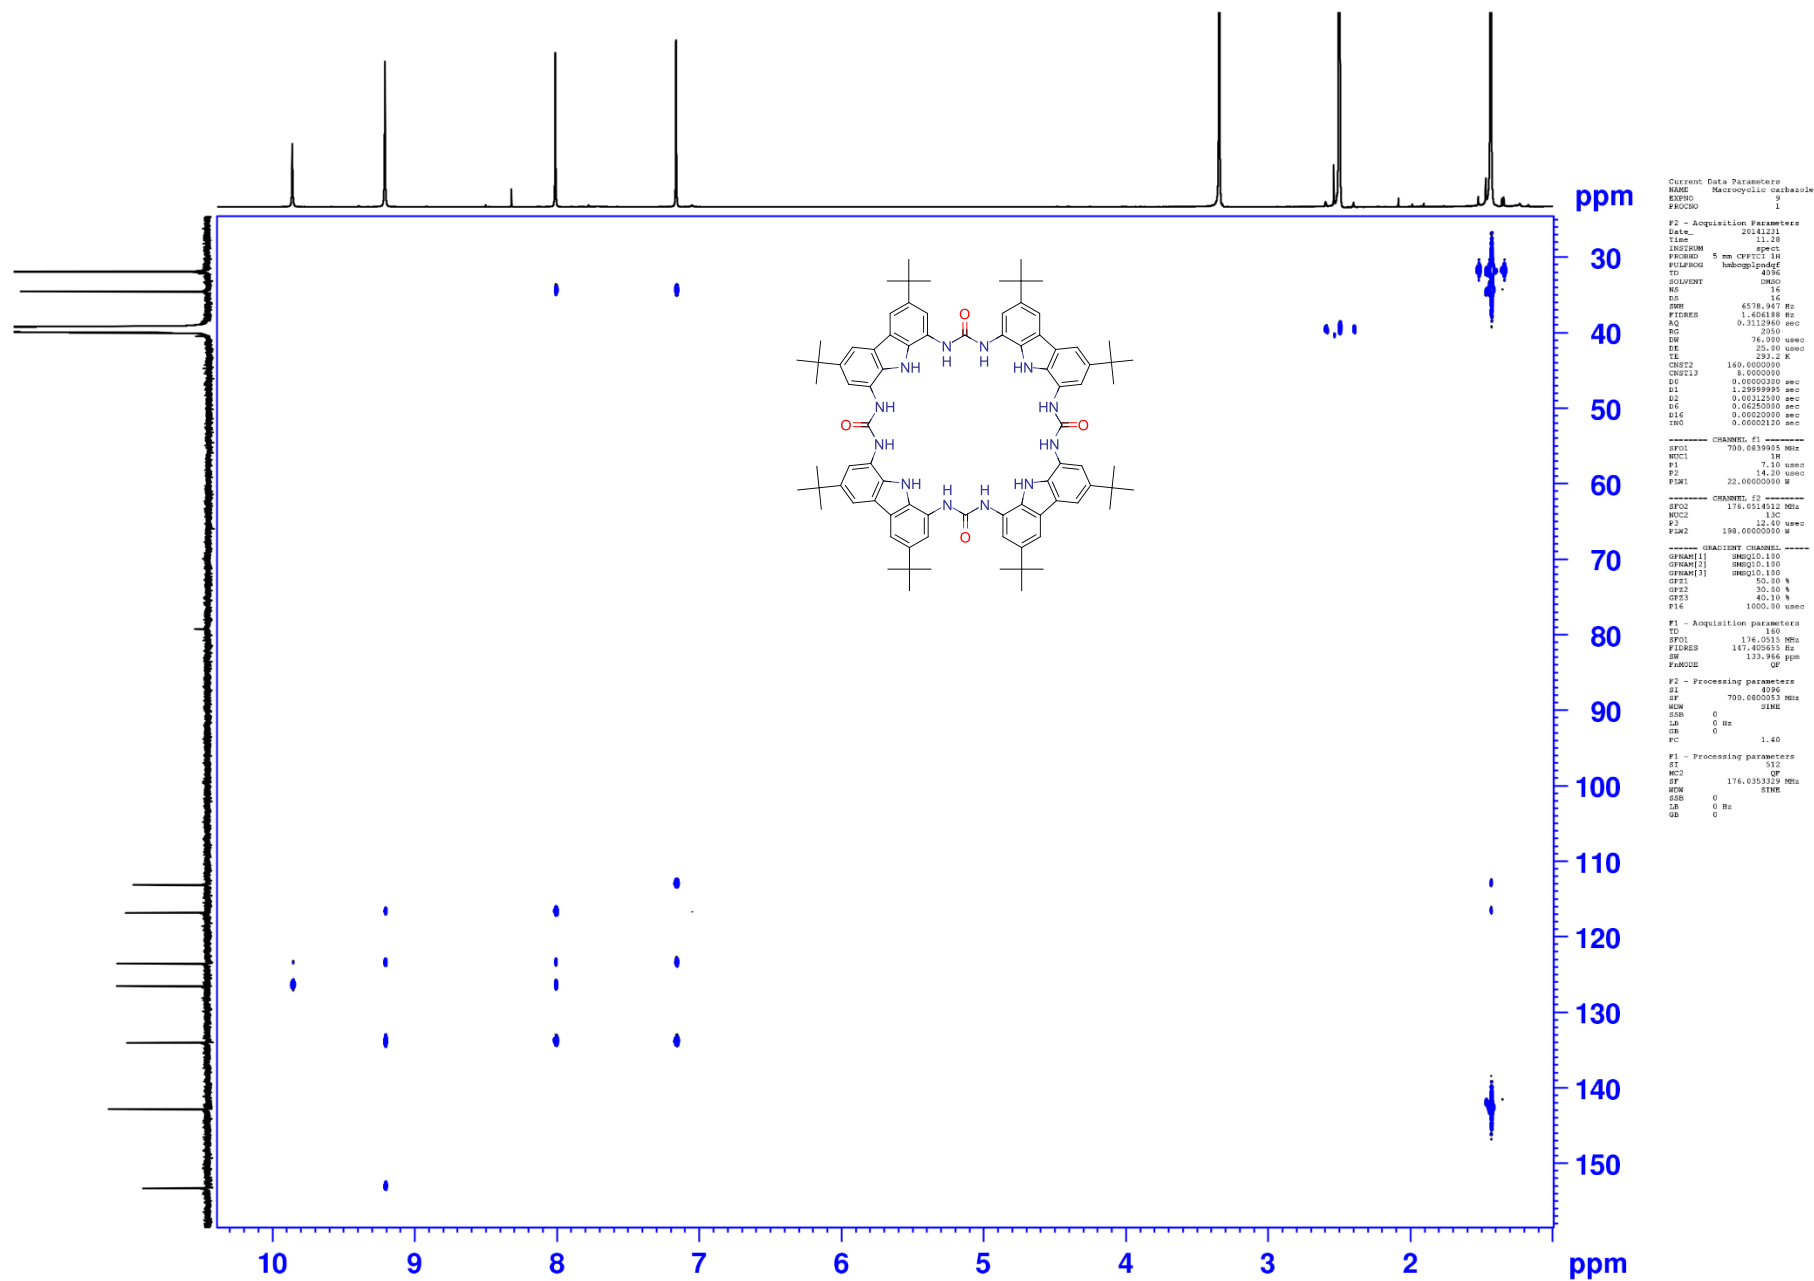

# HRMS spectrum of compound **MC002**

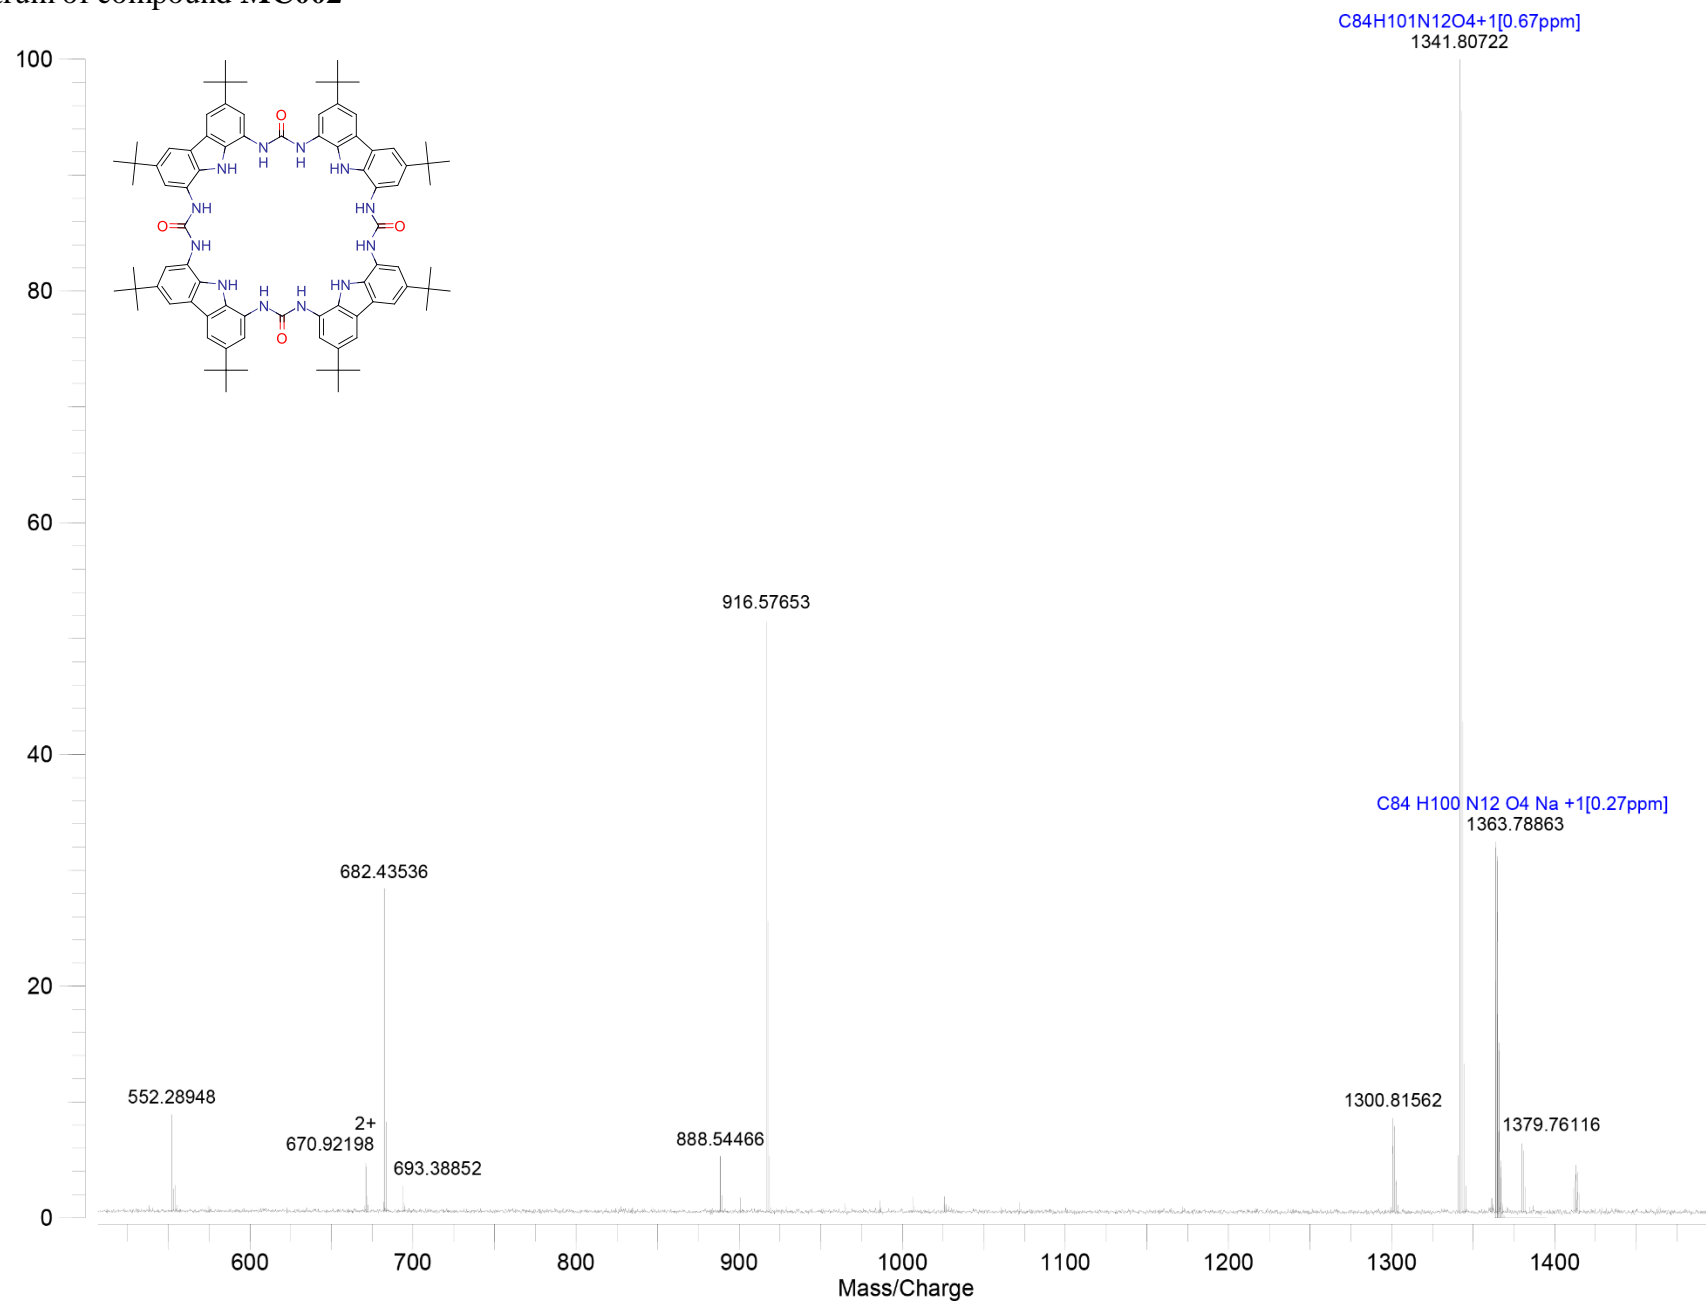

<sup>1</sup>H NMR spectrum (700.1 MHz) of compound **MC003**

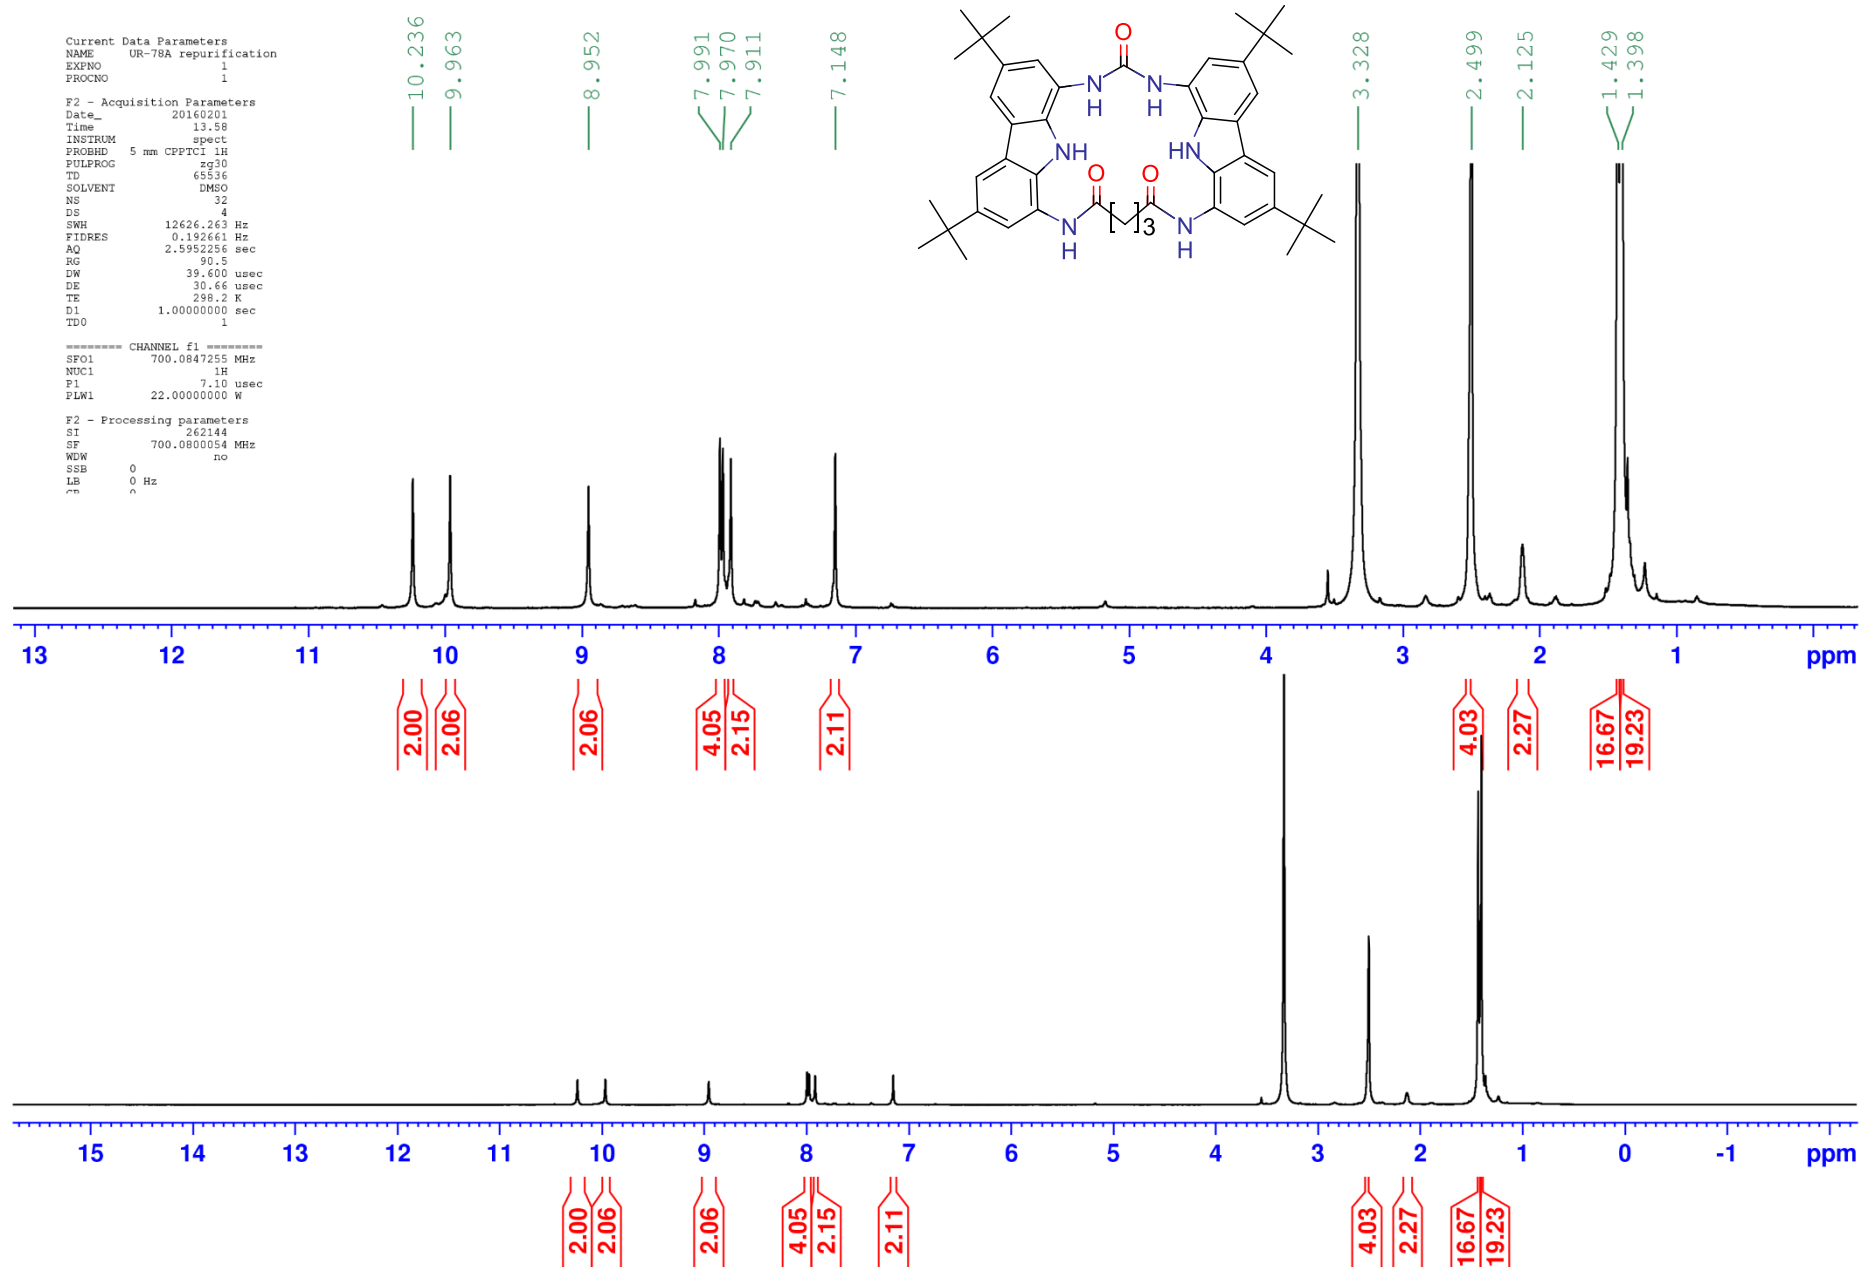

<sup>13</sup>C NMR spectrum (700.1 MHz) of compound **MC003**

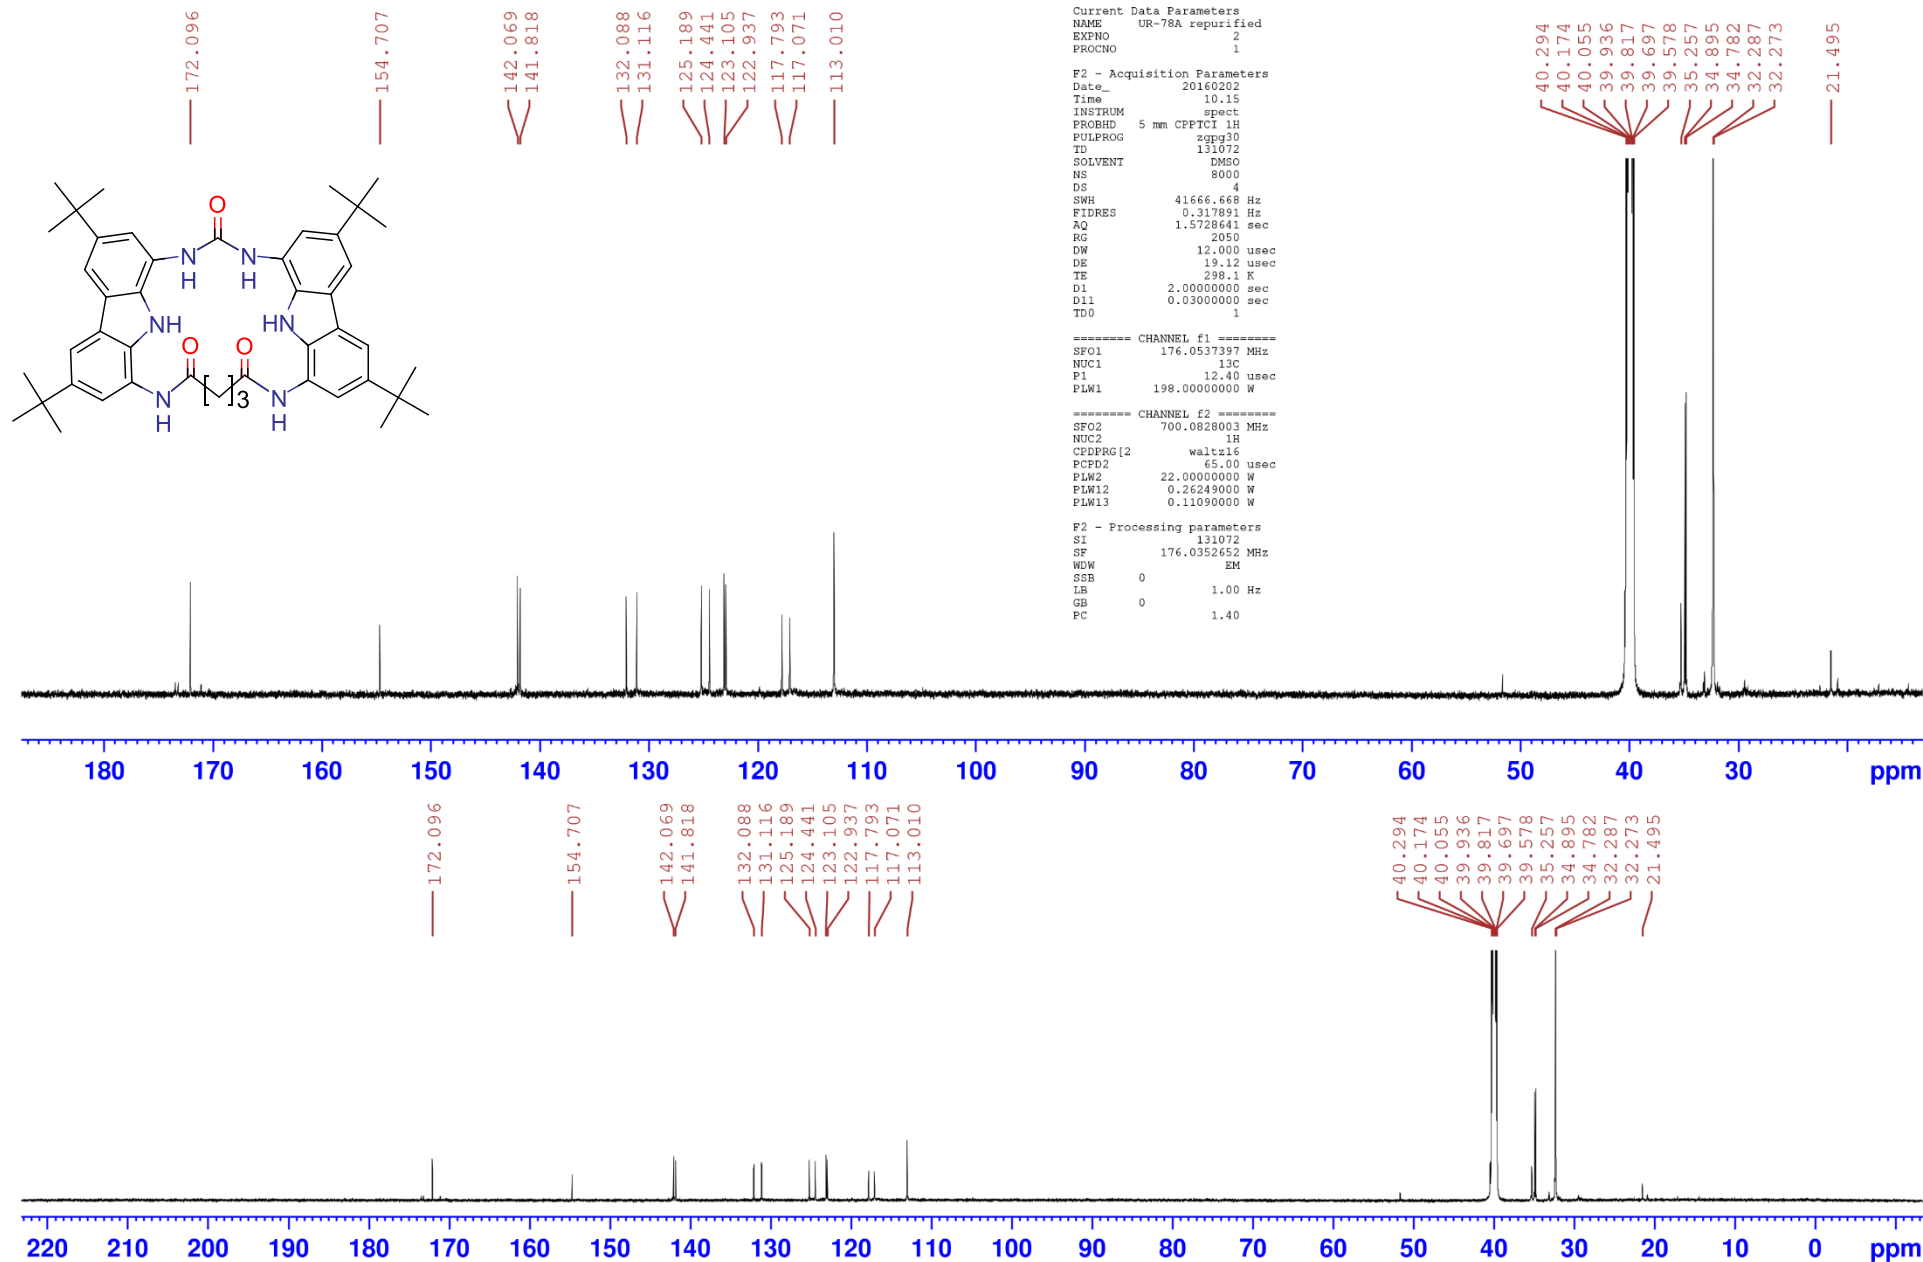

$^1\text{H}$ - $^{13}\text{C}$  HSQC spectrum (700.1 MHz) of compound **MC003**

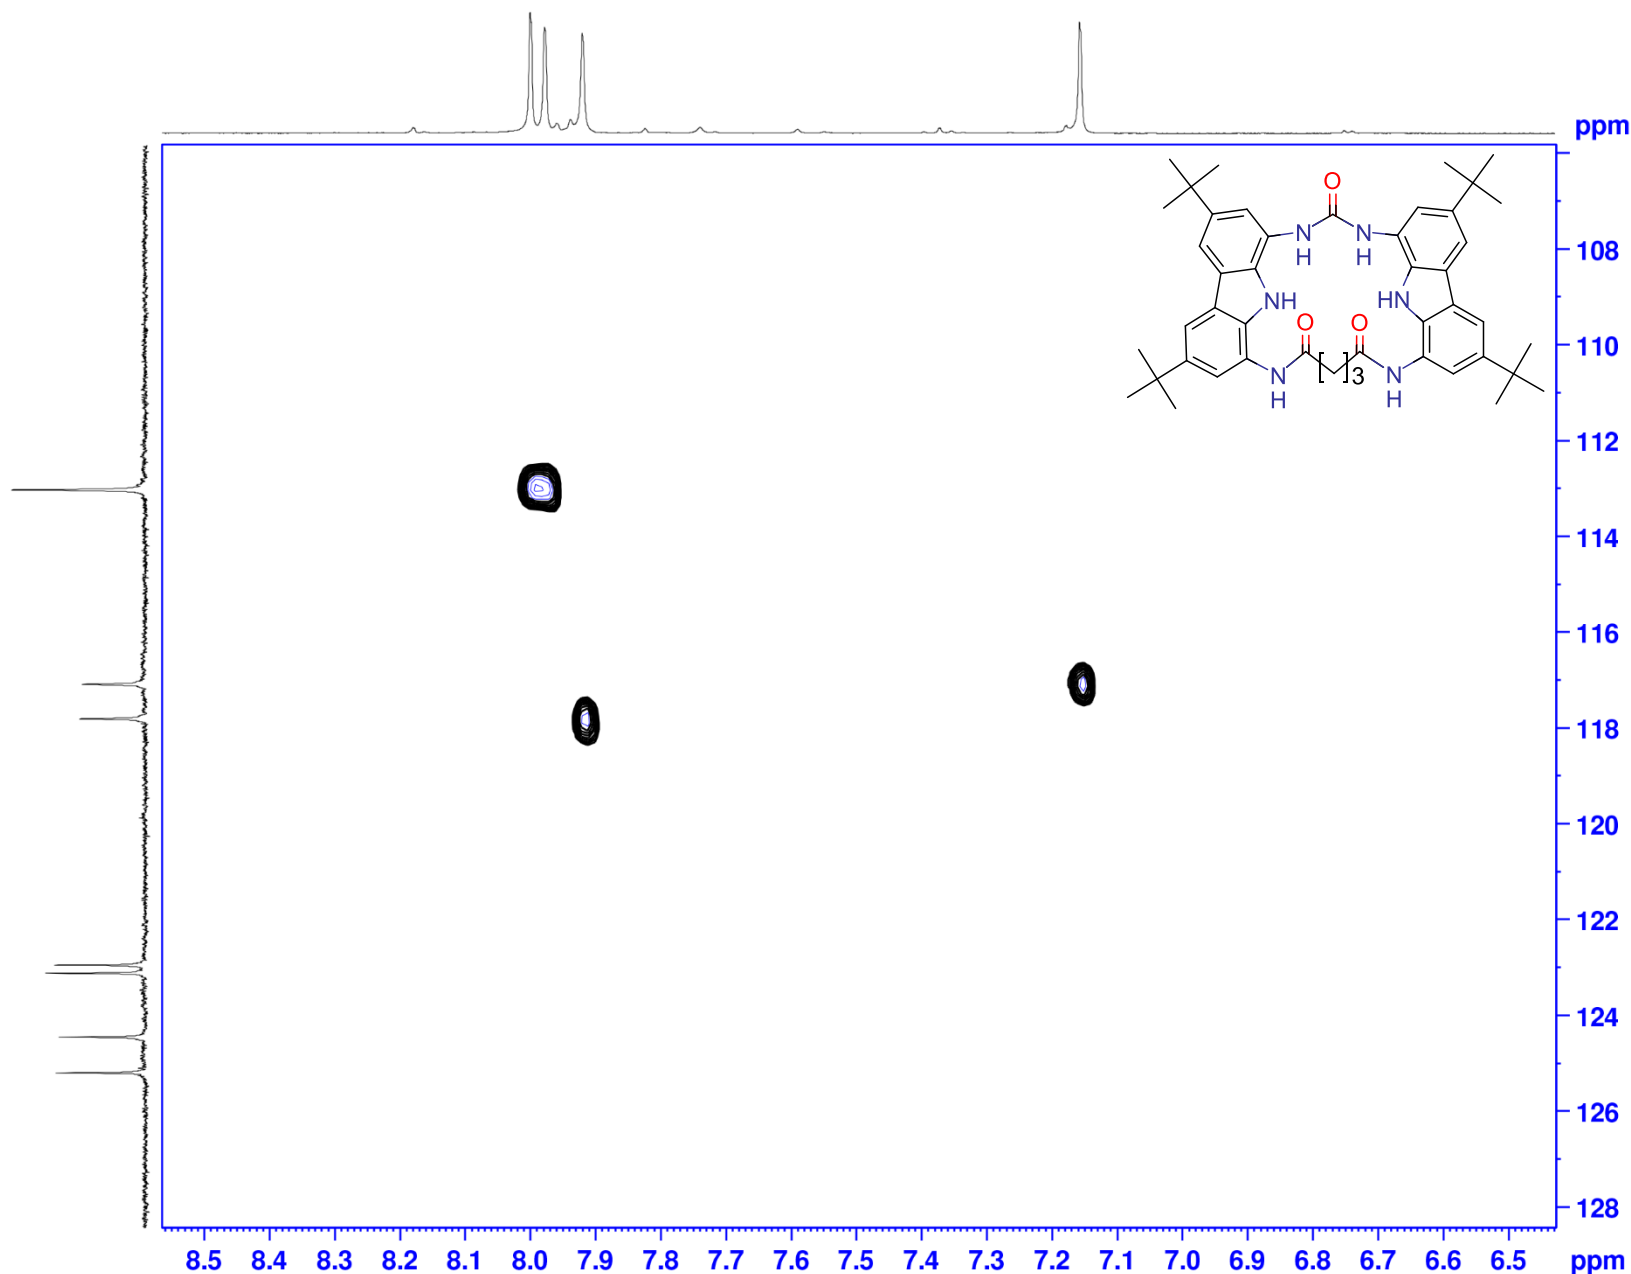

```

Current Data Parameters
NAME          UR-78A
EXPNO         4
PROCNO        1

F2 - Acquisition Parameters
Date_         20160602
Time          15.10
INSTRUM       spect
PROBHD        5 mm PABBO BB-
PULPROG       hsqcetdtp
TD            1024
SOLVENT       DMSO
NS            2
DS            16
SWH           7246.377 Hz
FIDRES        7.076540 Hz
AQ            0.0706560 sec
RG            2050
DW            69.000 usec
DE            6.50 usec
TE            298.2 K
CNST2         145.0000000
D0            0.00000300 sec
D1            1.50389099 sec
D4            0.00172414 sec
D11           0.03000000 sec
D13           0.00000400 sec
D16           0.00020000 sec
D21           0.00345000 sec
IN0           0.00001830 sec
ZGPGTNS

===== CHANNEL f1 =====
SFO1          700.0840045 MHz
NUC1           1H
P1            16.40 usec
P2            32.80 usec
P28           1000.00 usec
PLW1          26.00000000 W

===== CHANNEL f2 =====
SFO2          176.0541798 MHz
NUC2           13C
CPDPRG[2]     garp
P3            10.00 usec
P4            20.00 usec
PCPD2         55.00 usec
PLW2          60.00000000 W
PLW12         1.98350000 W

===== GRADIENT CHANNEL =====
GPNAM[1]      SMSQ10.100
GPNAM[2]      SMSQ10.100
GPZ1          80.00 %
GPZ2          20.10 %
P16           1000.00 usec

F1 - Acquisition parameters
TD            256
SFO1          176.0542 MHz
FIDRES        106.728142 Hz
SW            155.193 ppm
FnMODE        Echo-Antiecho

F2 - Processing parameters
SI            1024
SF            700.0800000 MHz
WDW           QSINE
SSB           2
LB            0 Hz
GB            0
PC            1.40

F1 - Processing parameters
SI            1024
MC2           echo-antiecho
SF            176.0352560 MHz
WDW           QSINE
SSB           2
LB            0 Hz
GB            0
  
```



$^1\text{H}$ - $^{13}\text{C}$  HMBC spectrum (700.1 MHz) of compound **MC003**

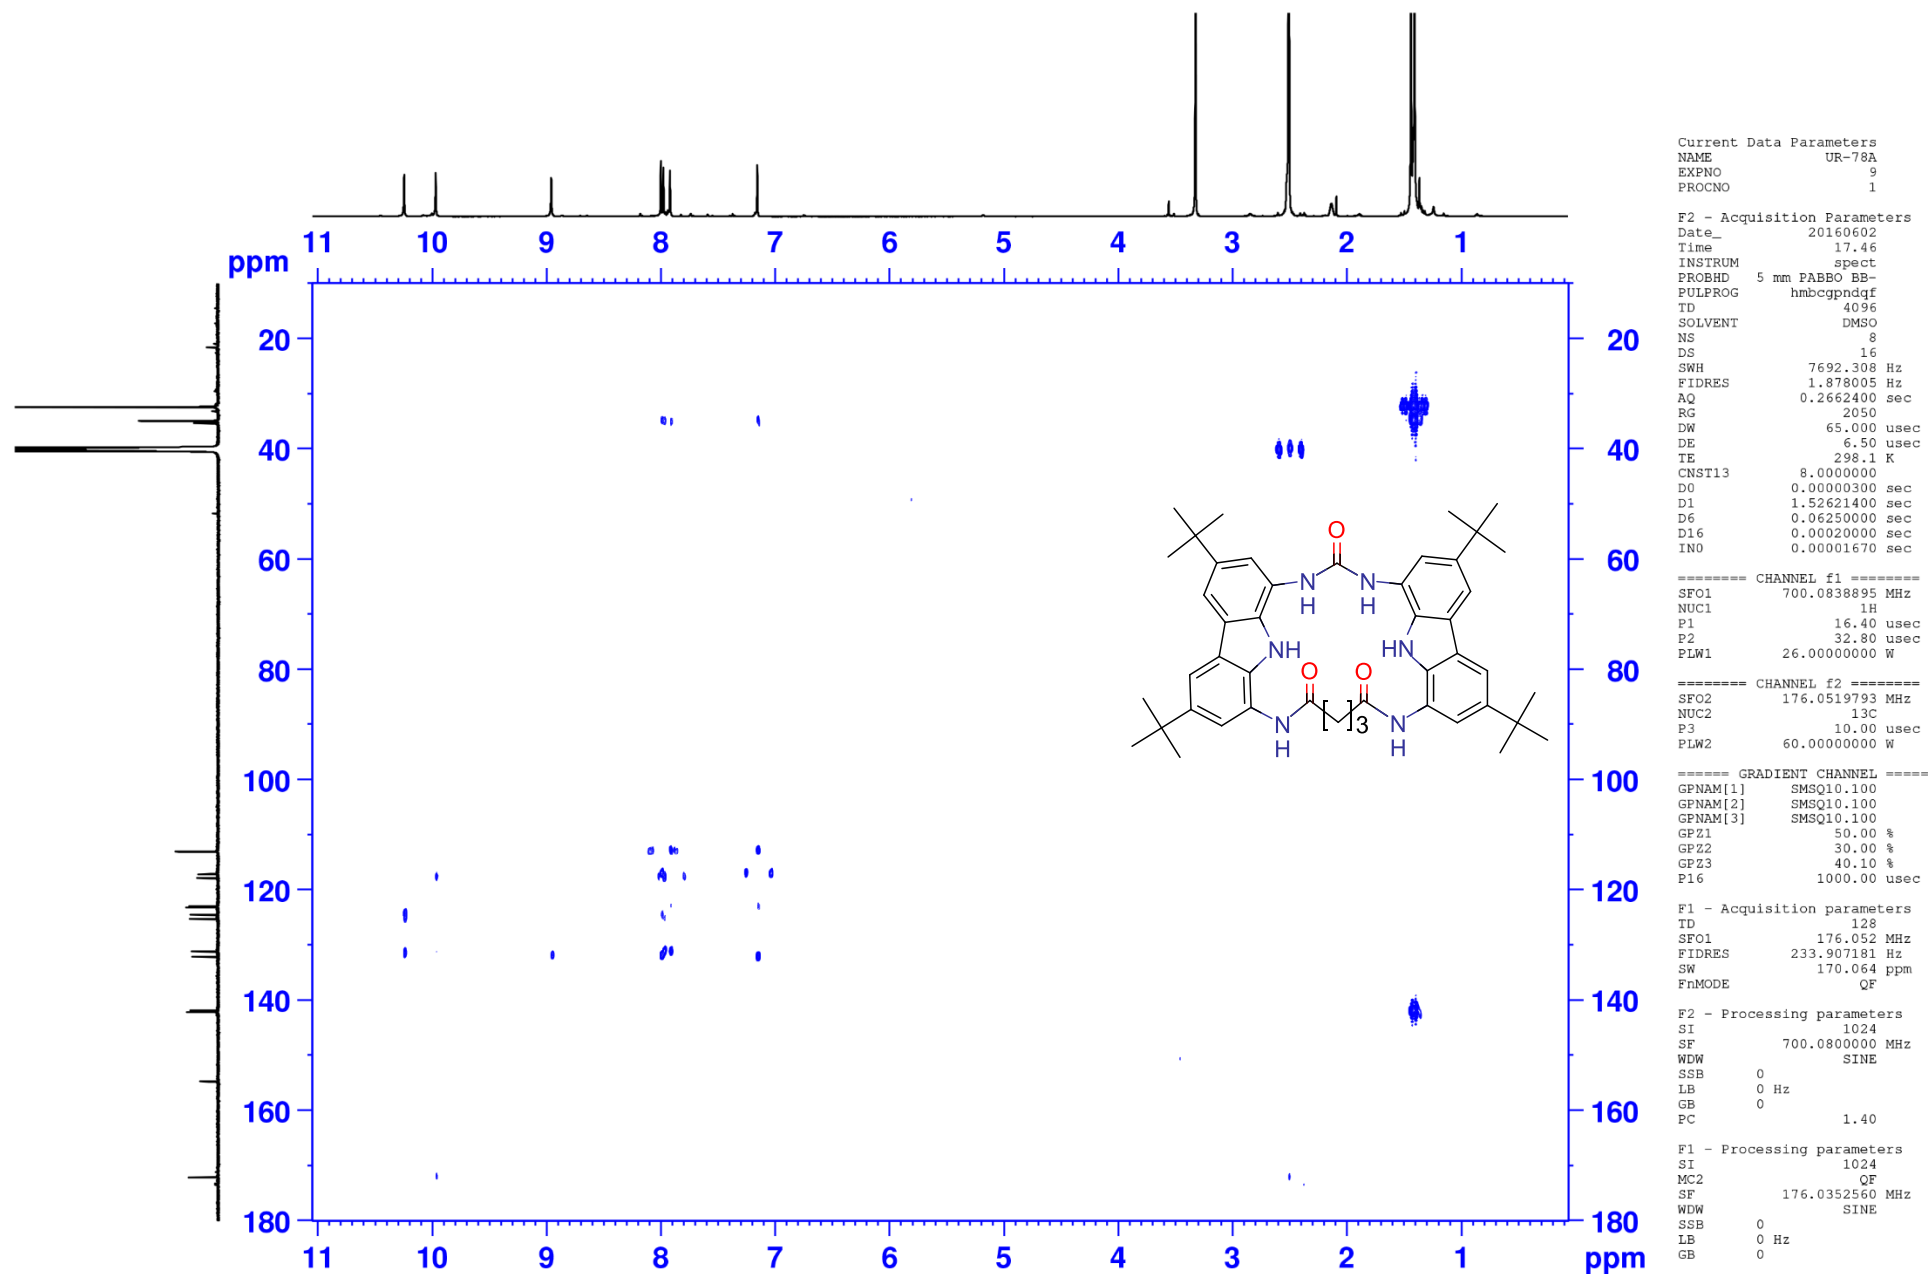

# HRMS spectrum of compound MC003

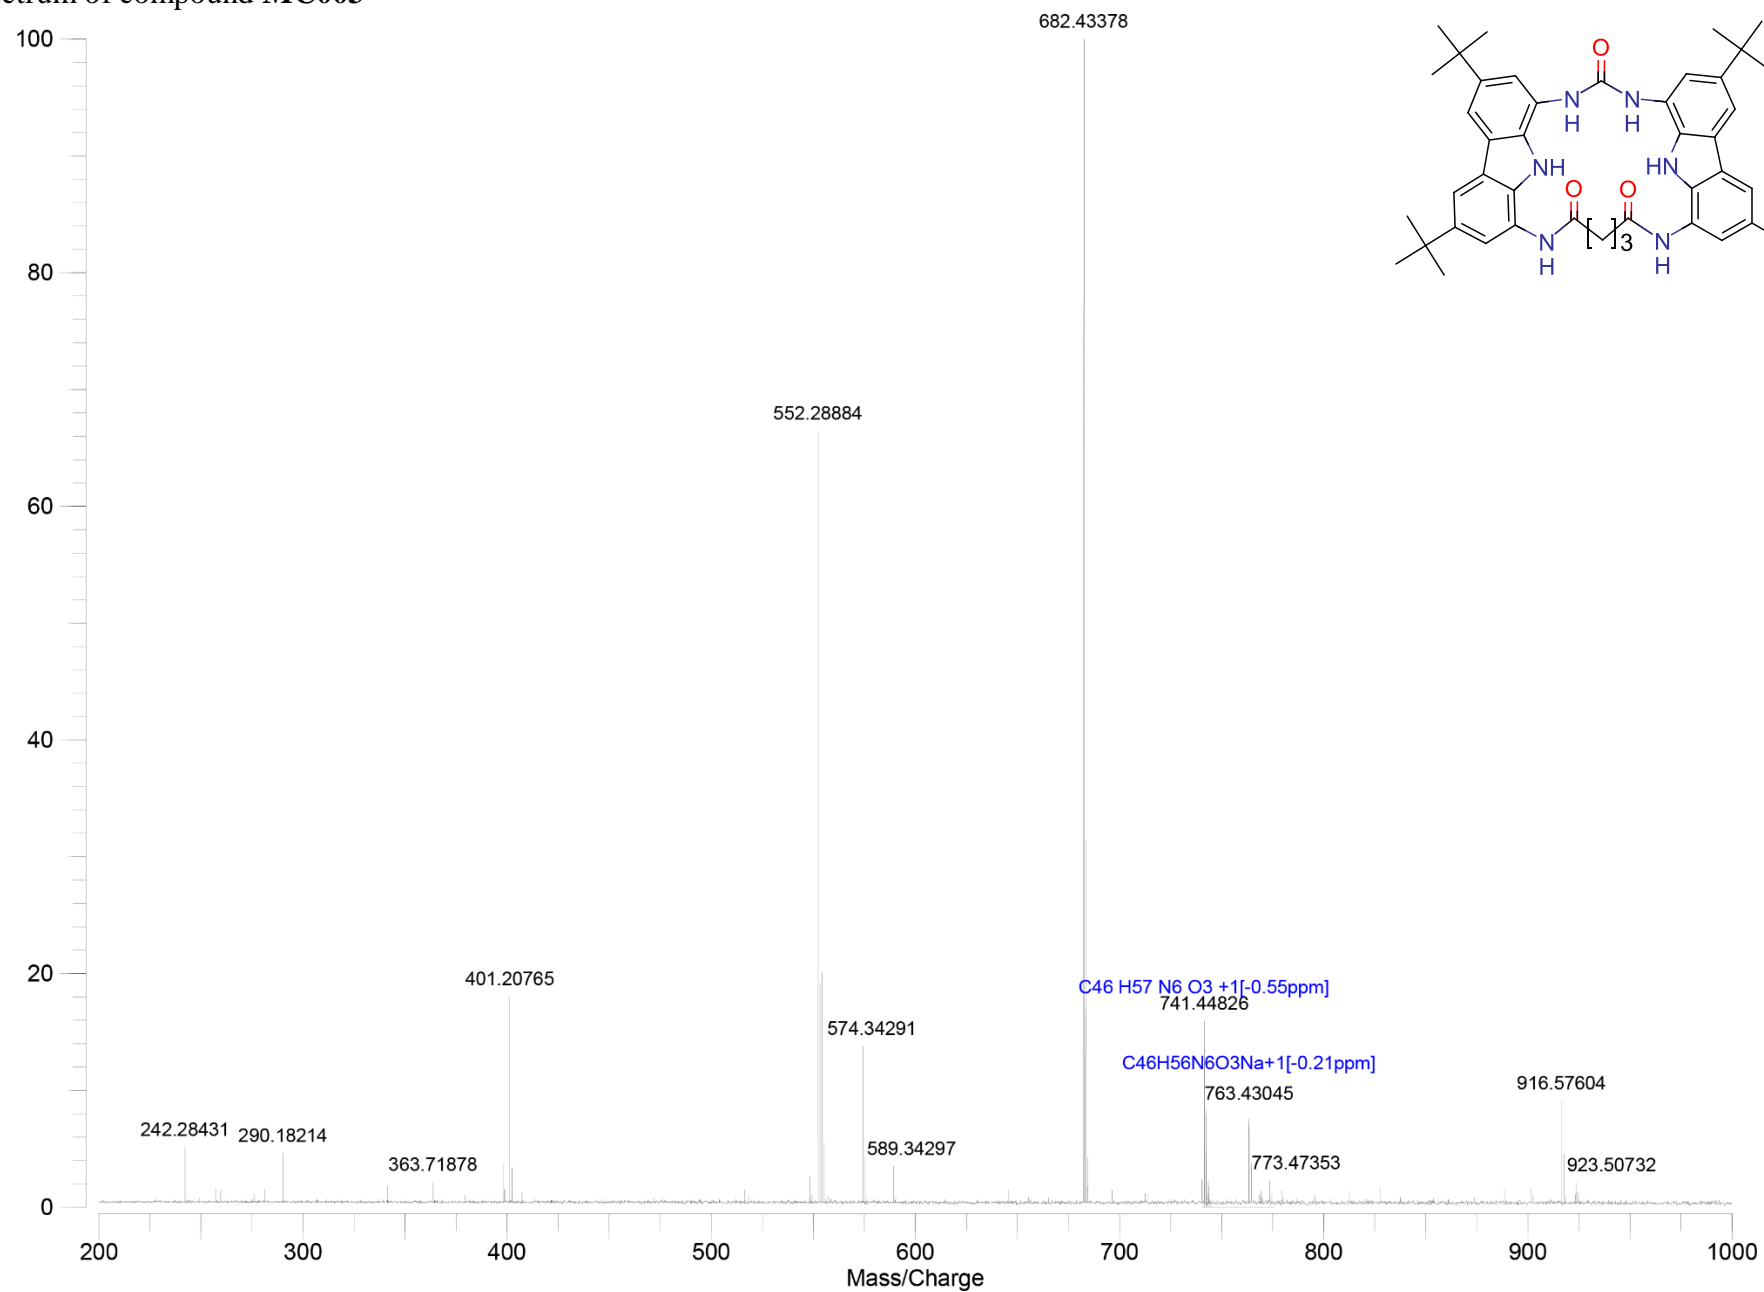

<sup>1</sup>H NMR spectrum (700.1 MHz) of compound **MC004**

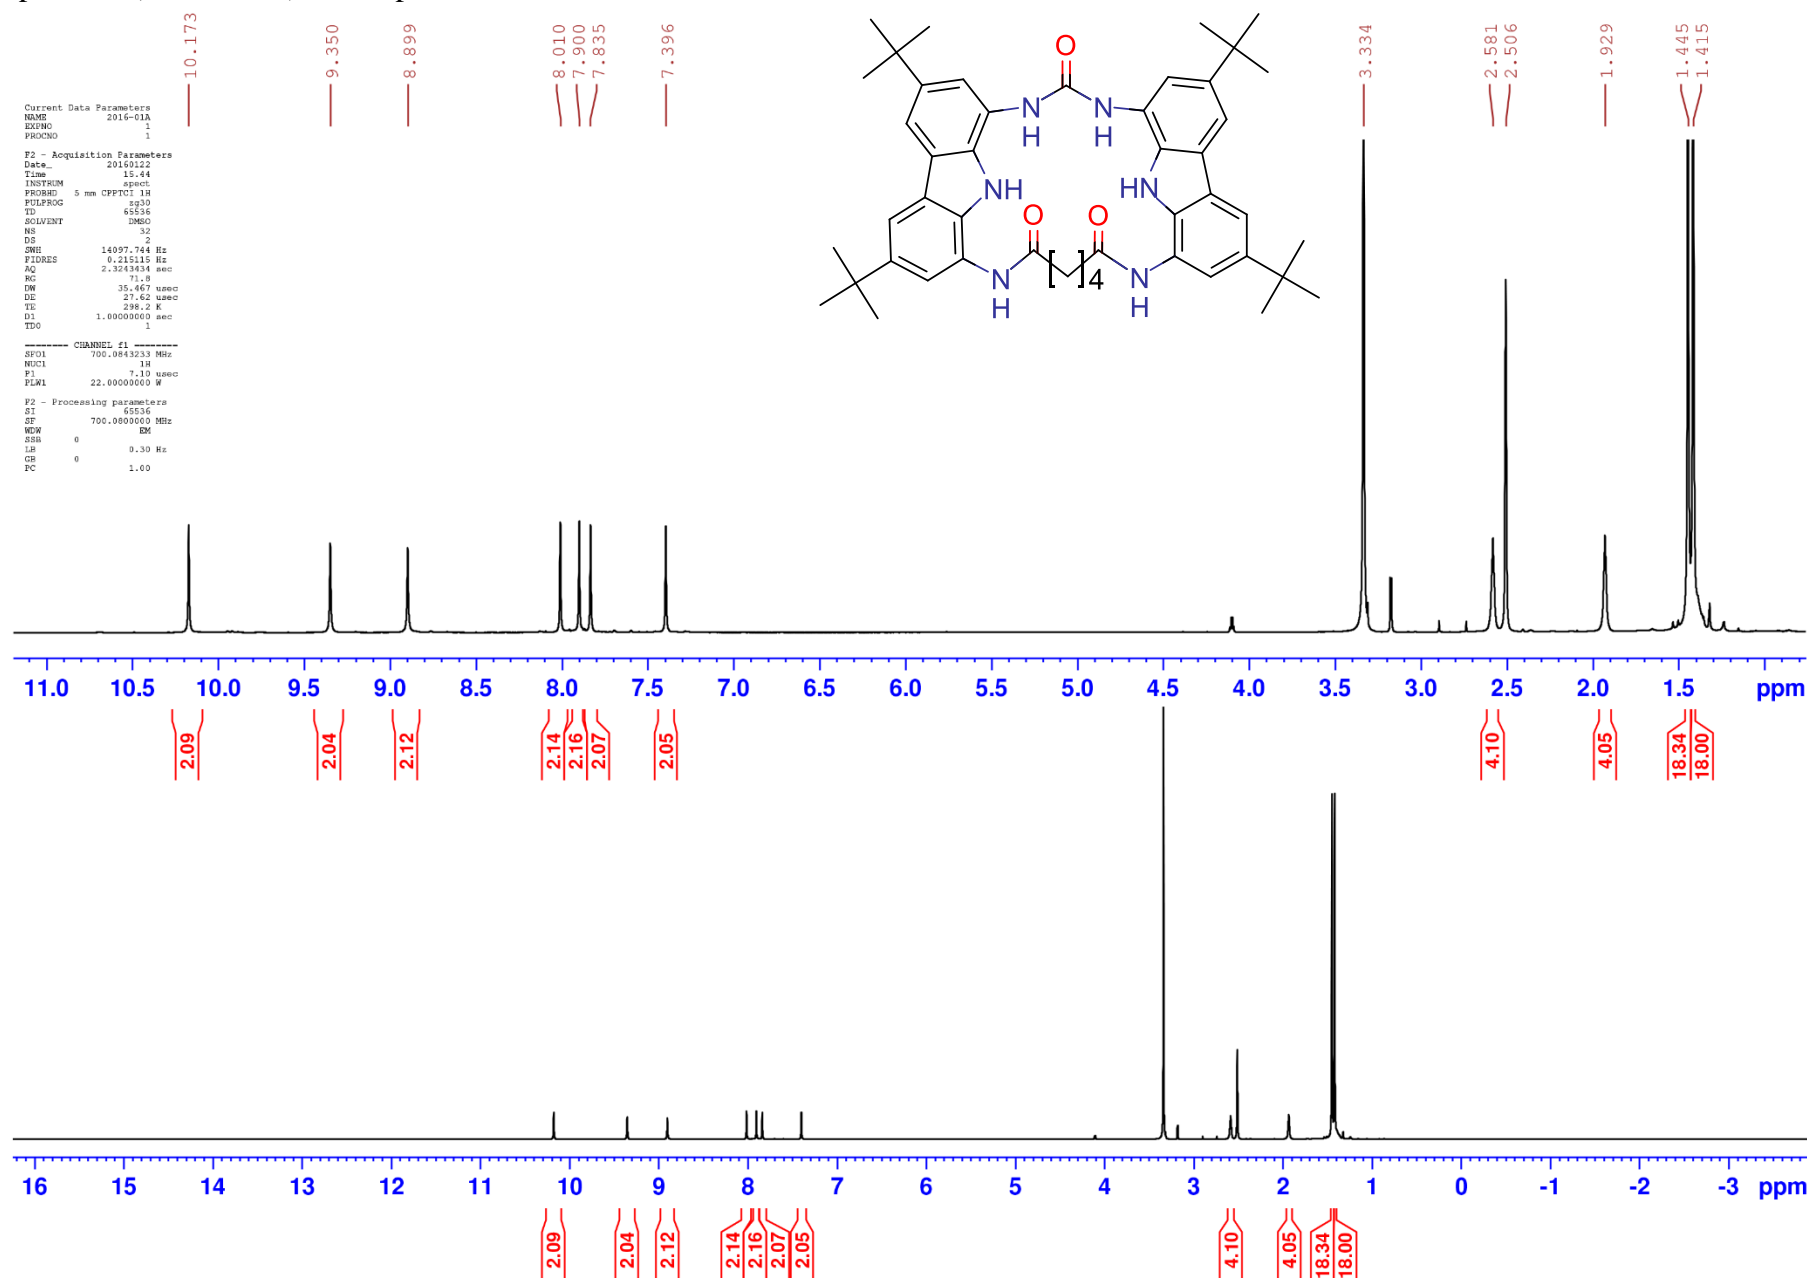

<sup>13</sup>C NMR spectrum (700.1 MHz) of compound **MC004**

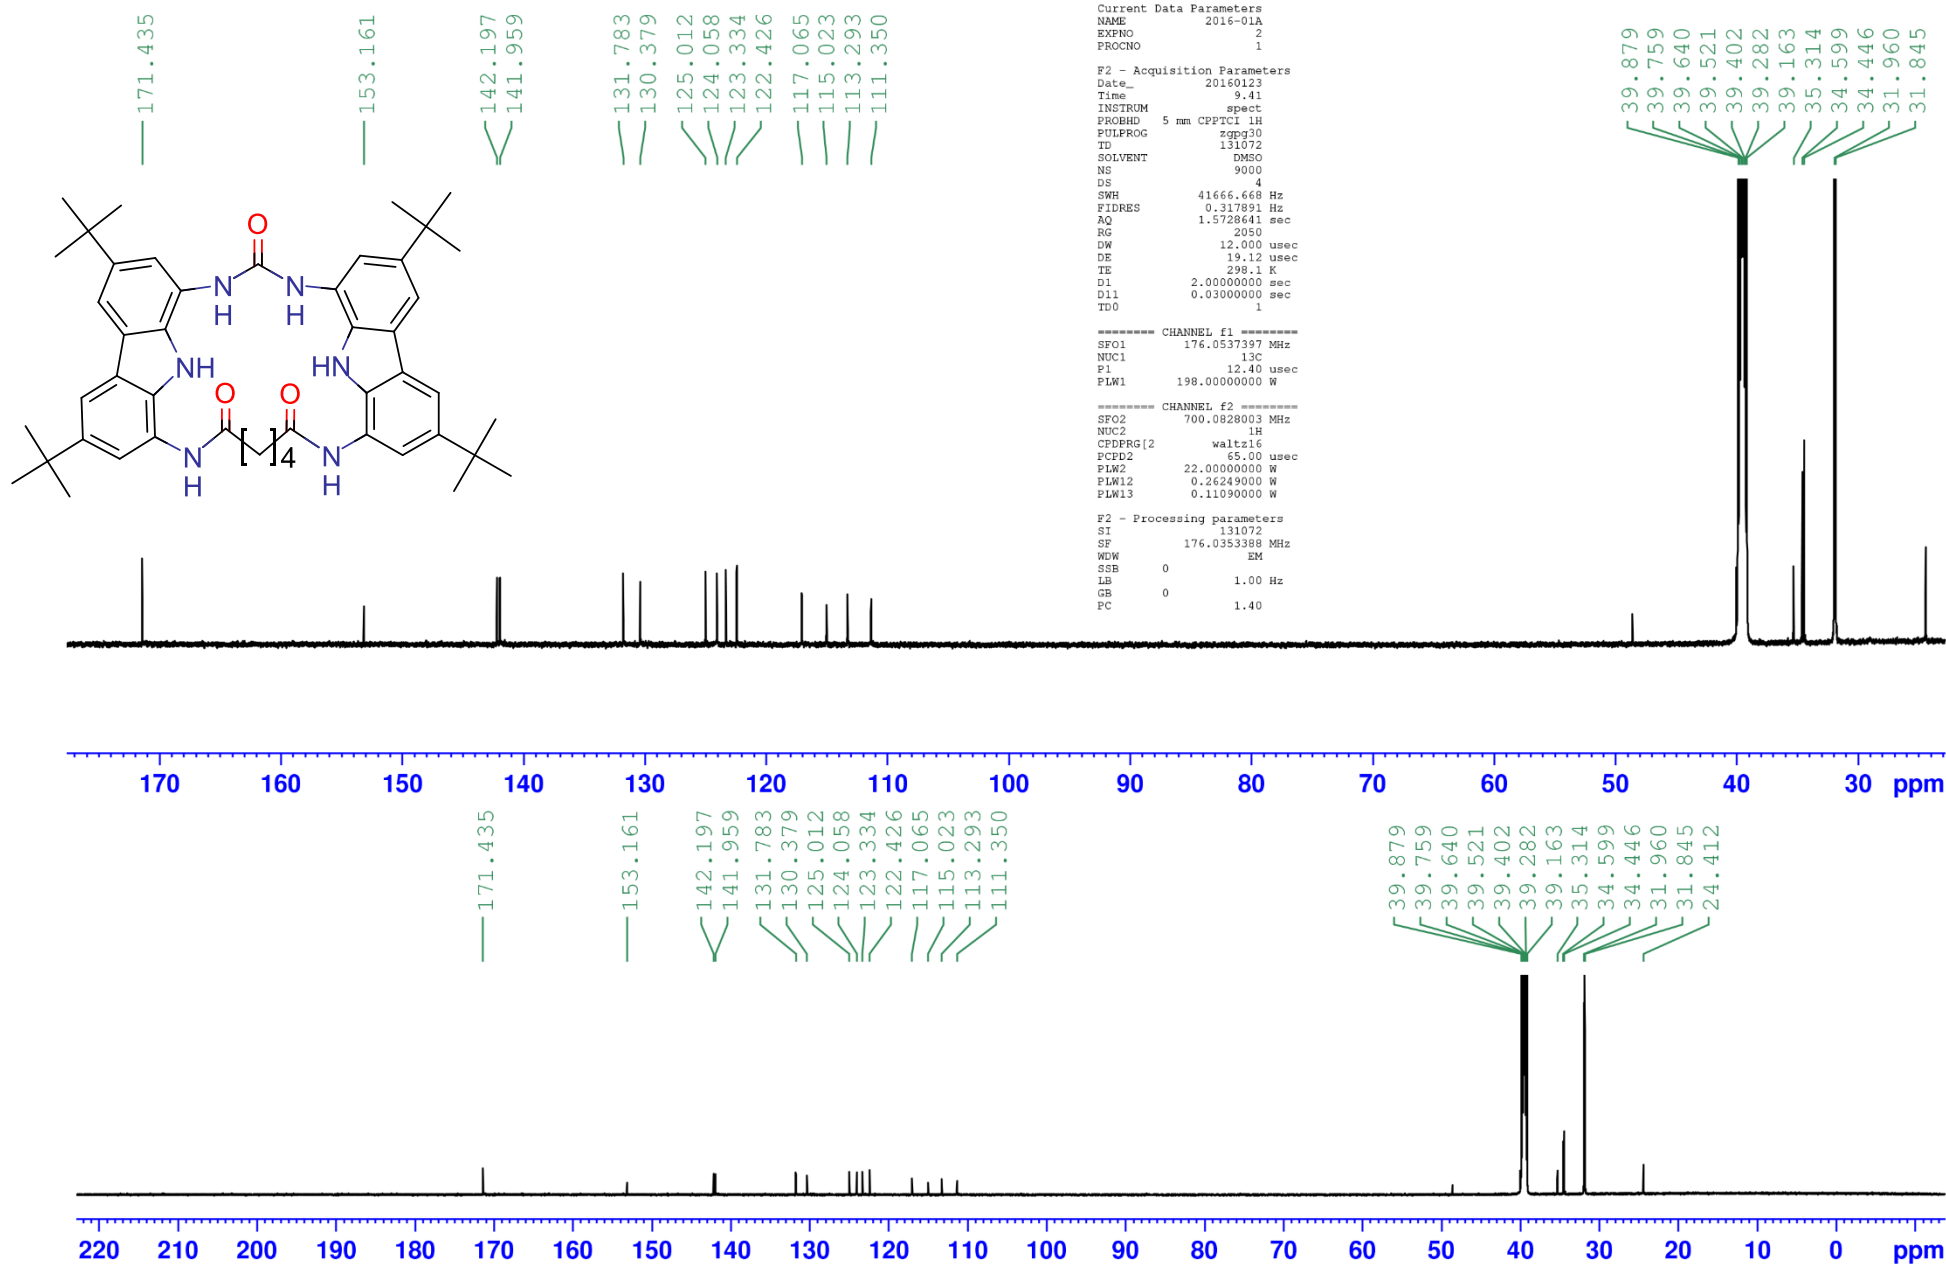

$^1\text{H}$ - $^{13}\text{C}$  HSQC spectrum (700.1 MHz) of compound **MC004**

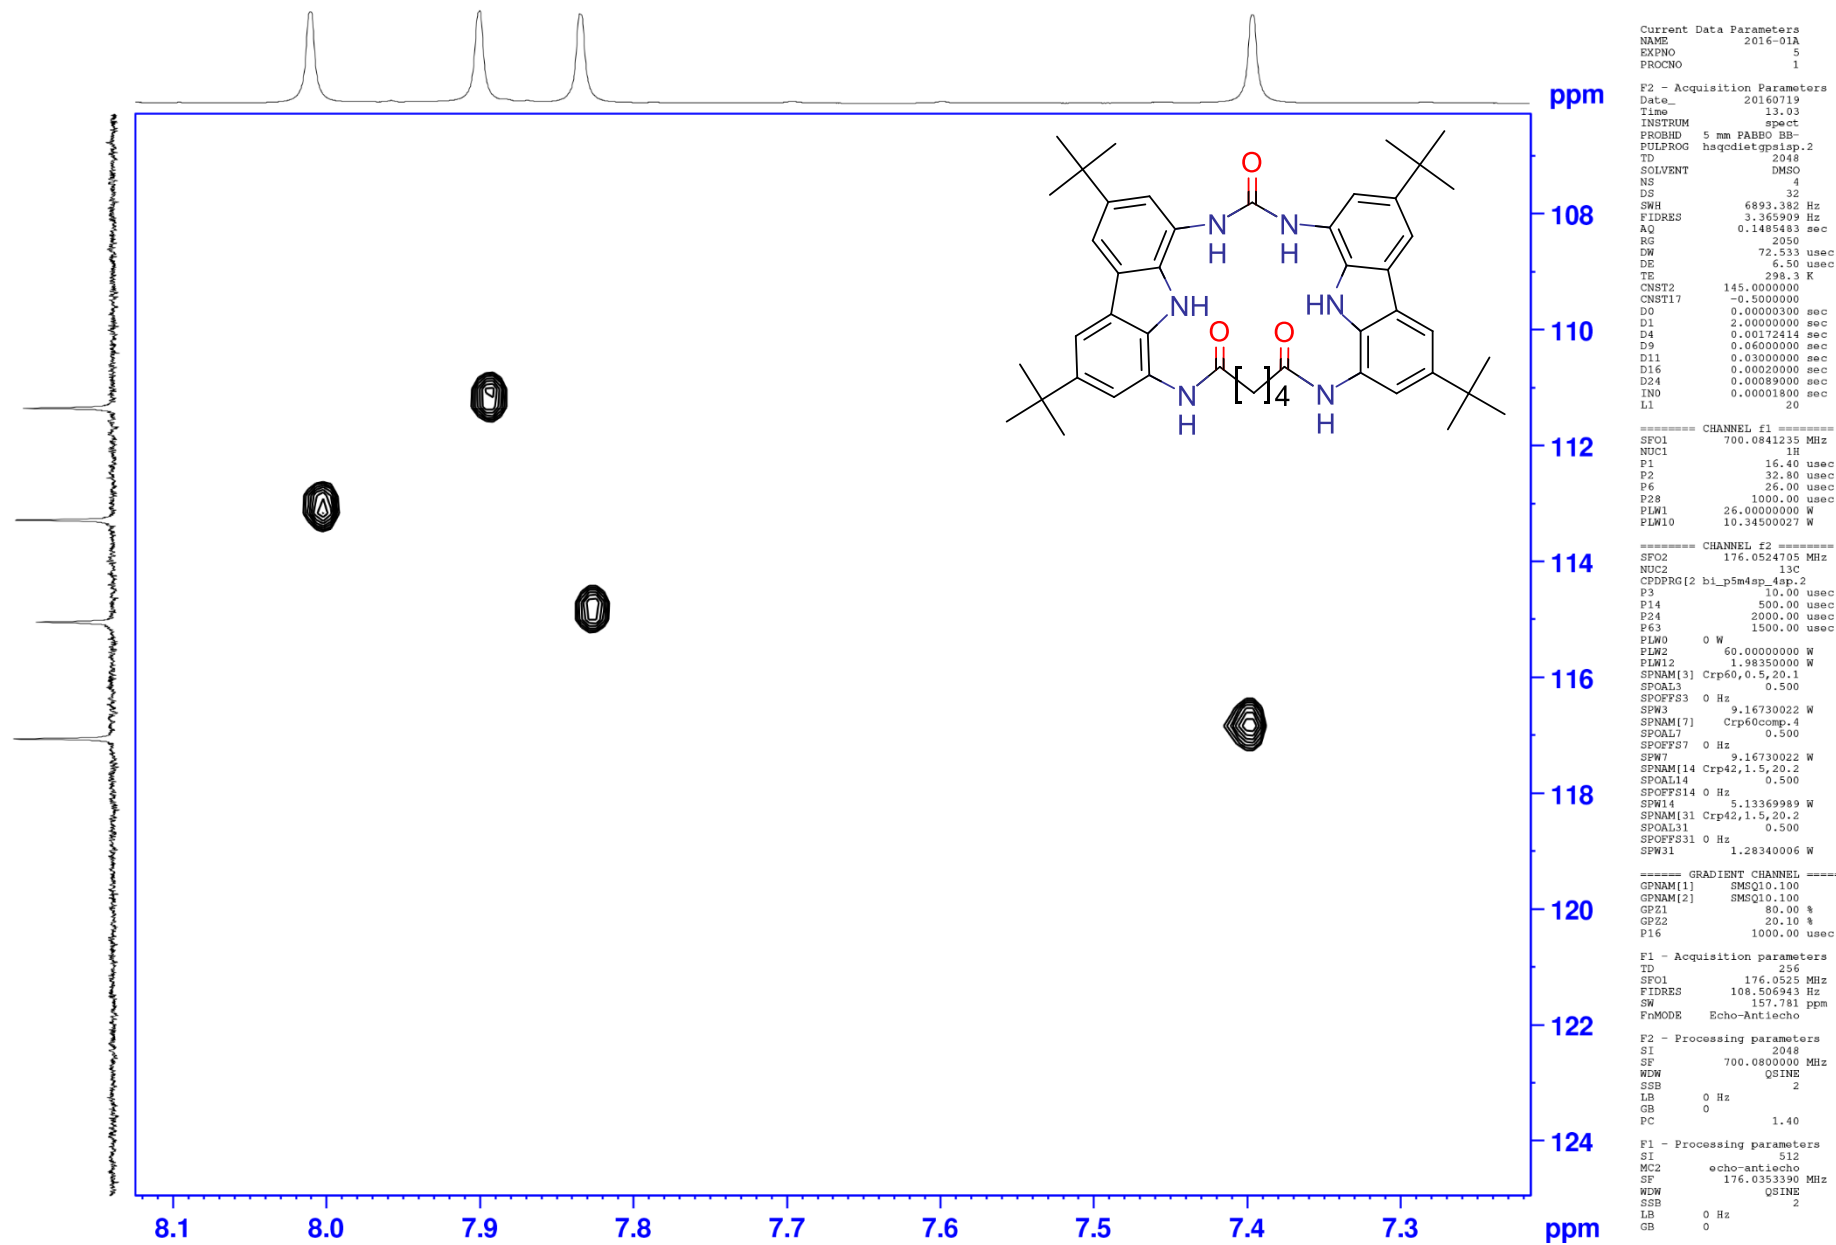

$^1\text{H}$ - $^{13}\text{C}$  HMBC spectrum (700.1 MHz) of compound **MC004**

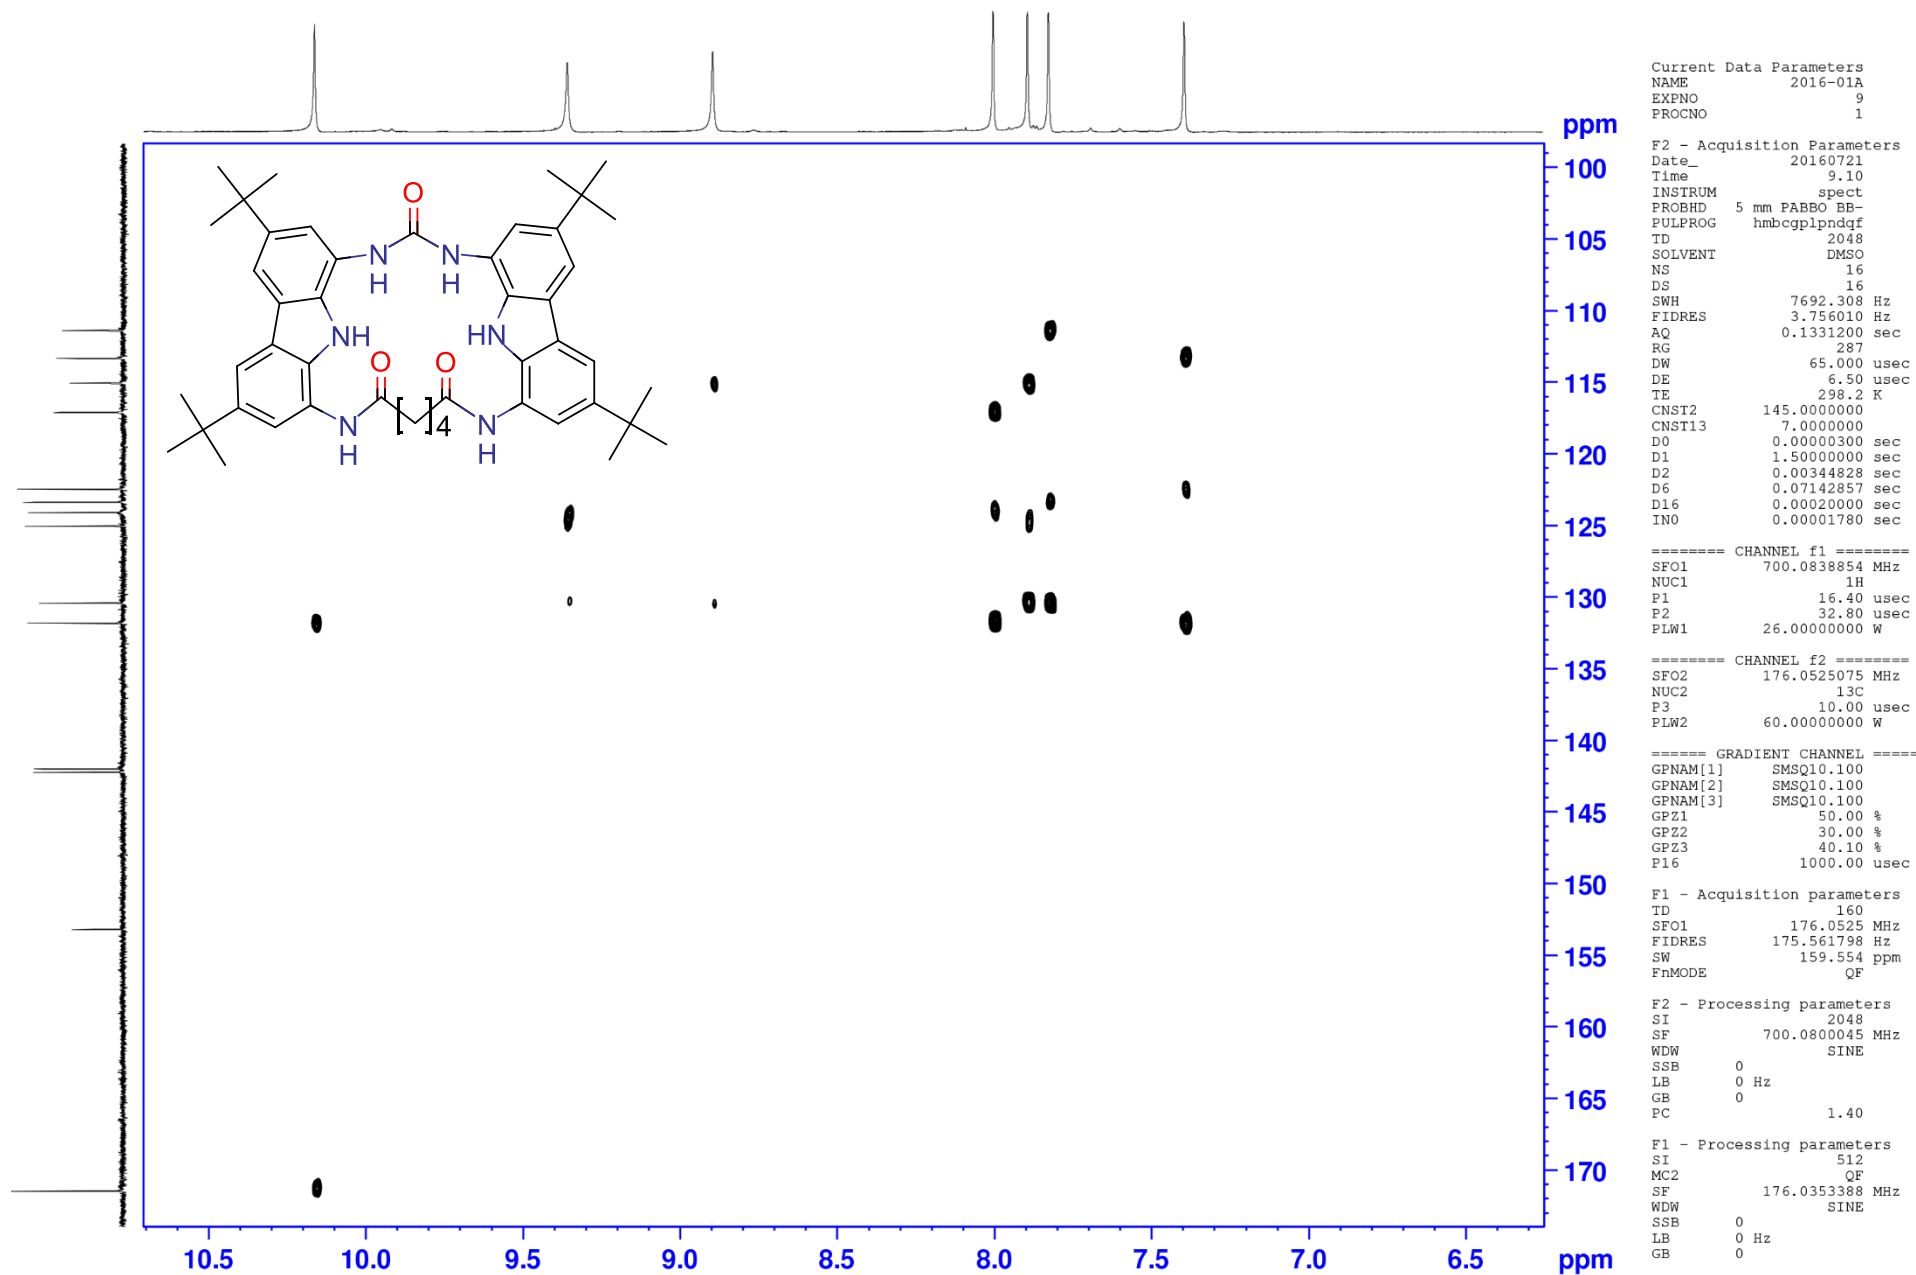

# HRMS spectrum of compound MC004

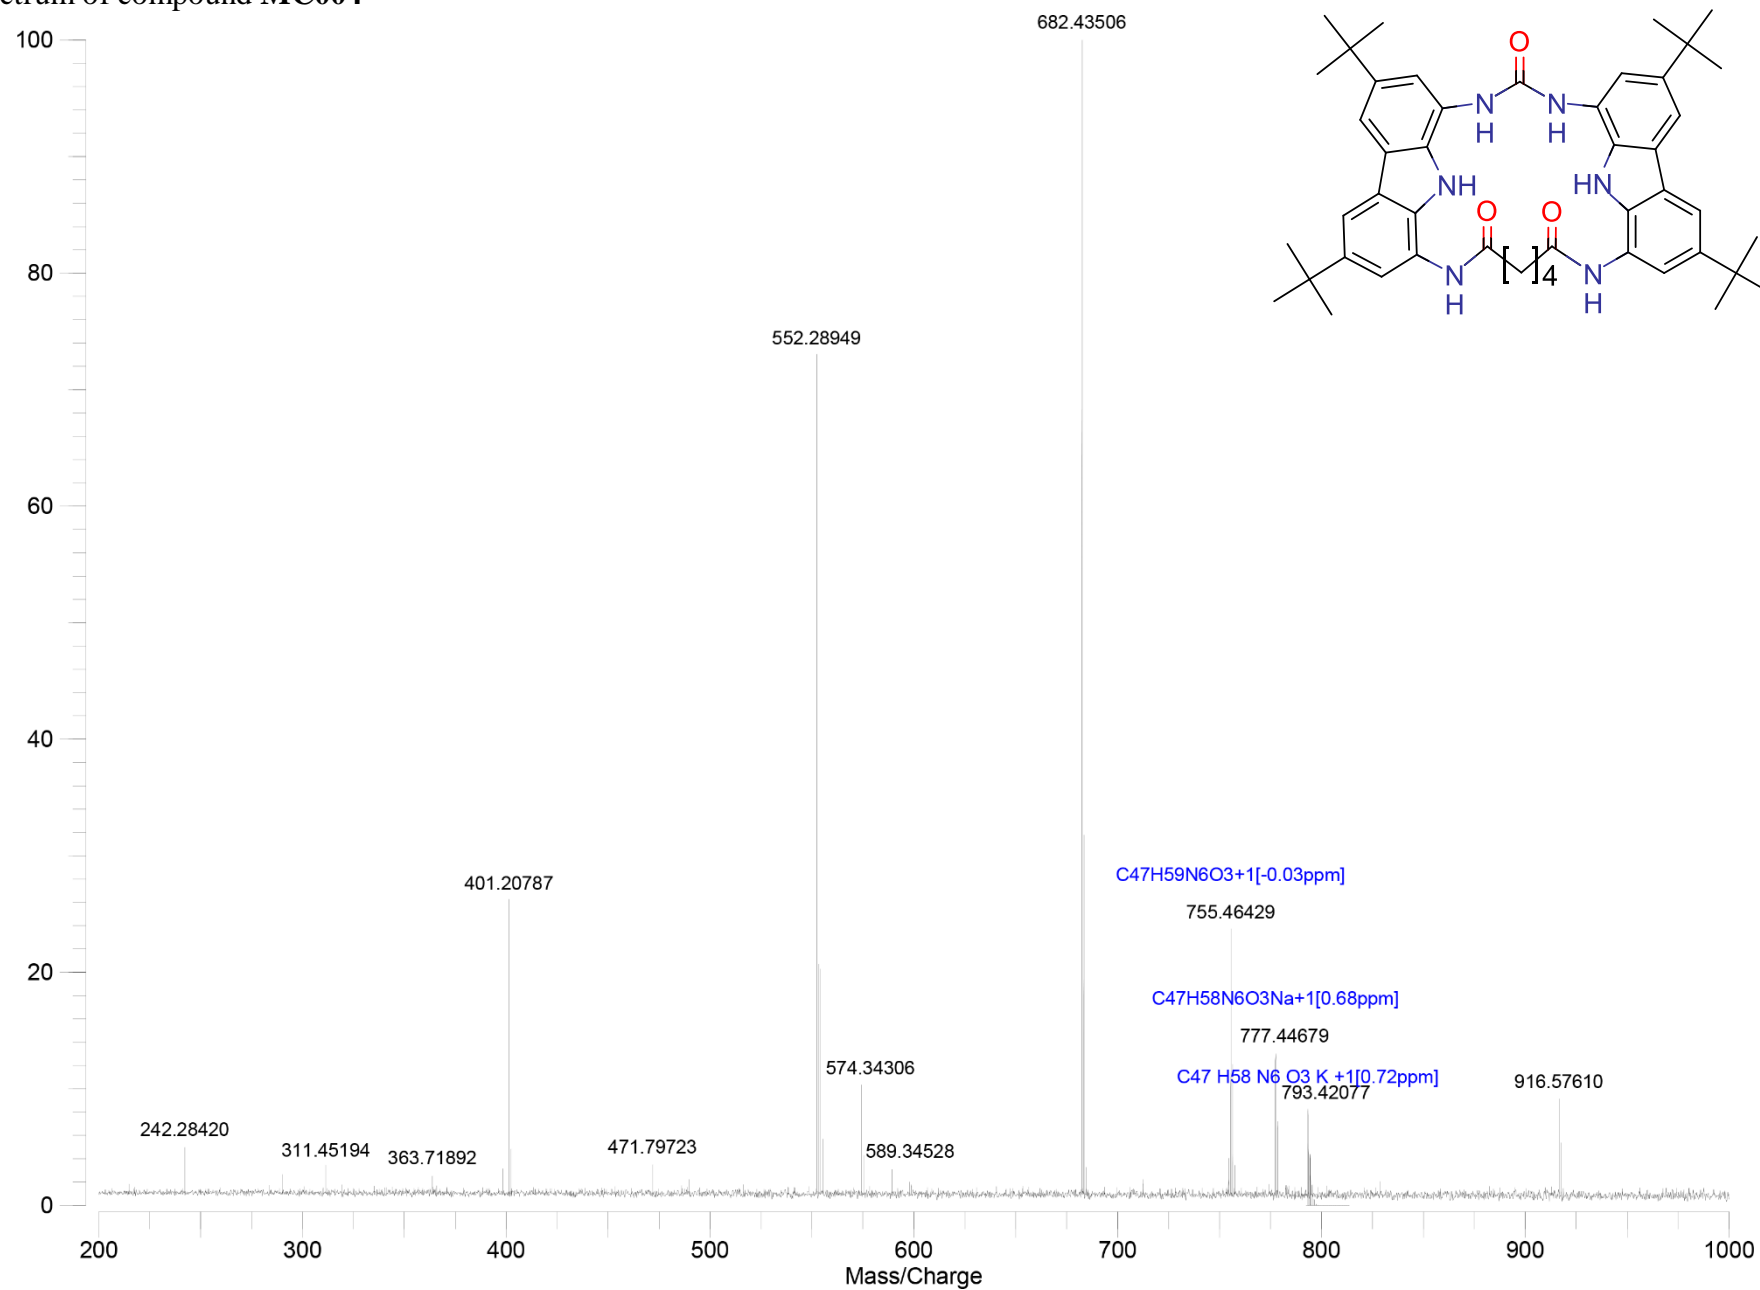

<sup>1</sup>H NMR spectrum (700.1 MHz) of compound **MC005**

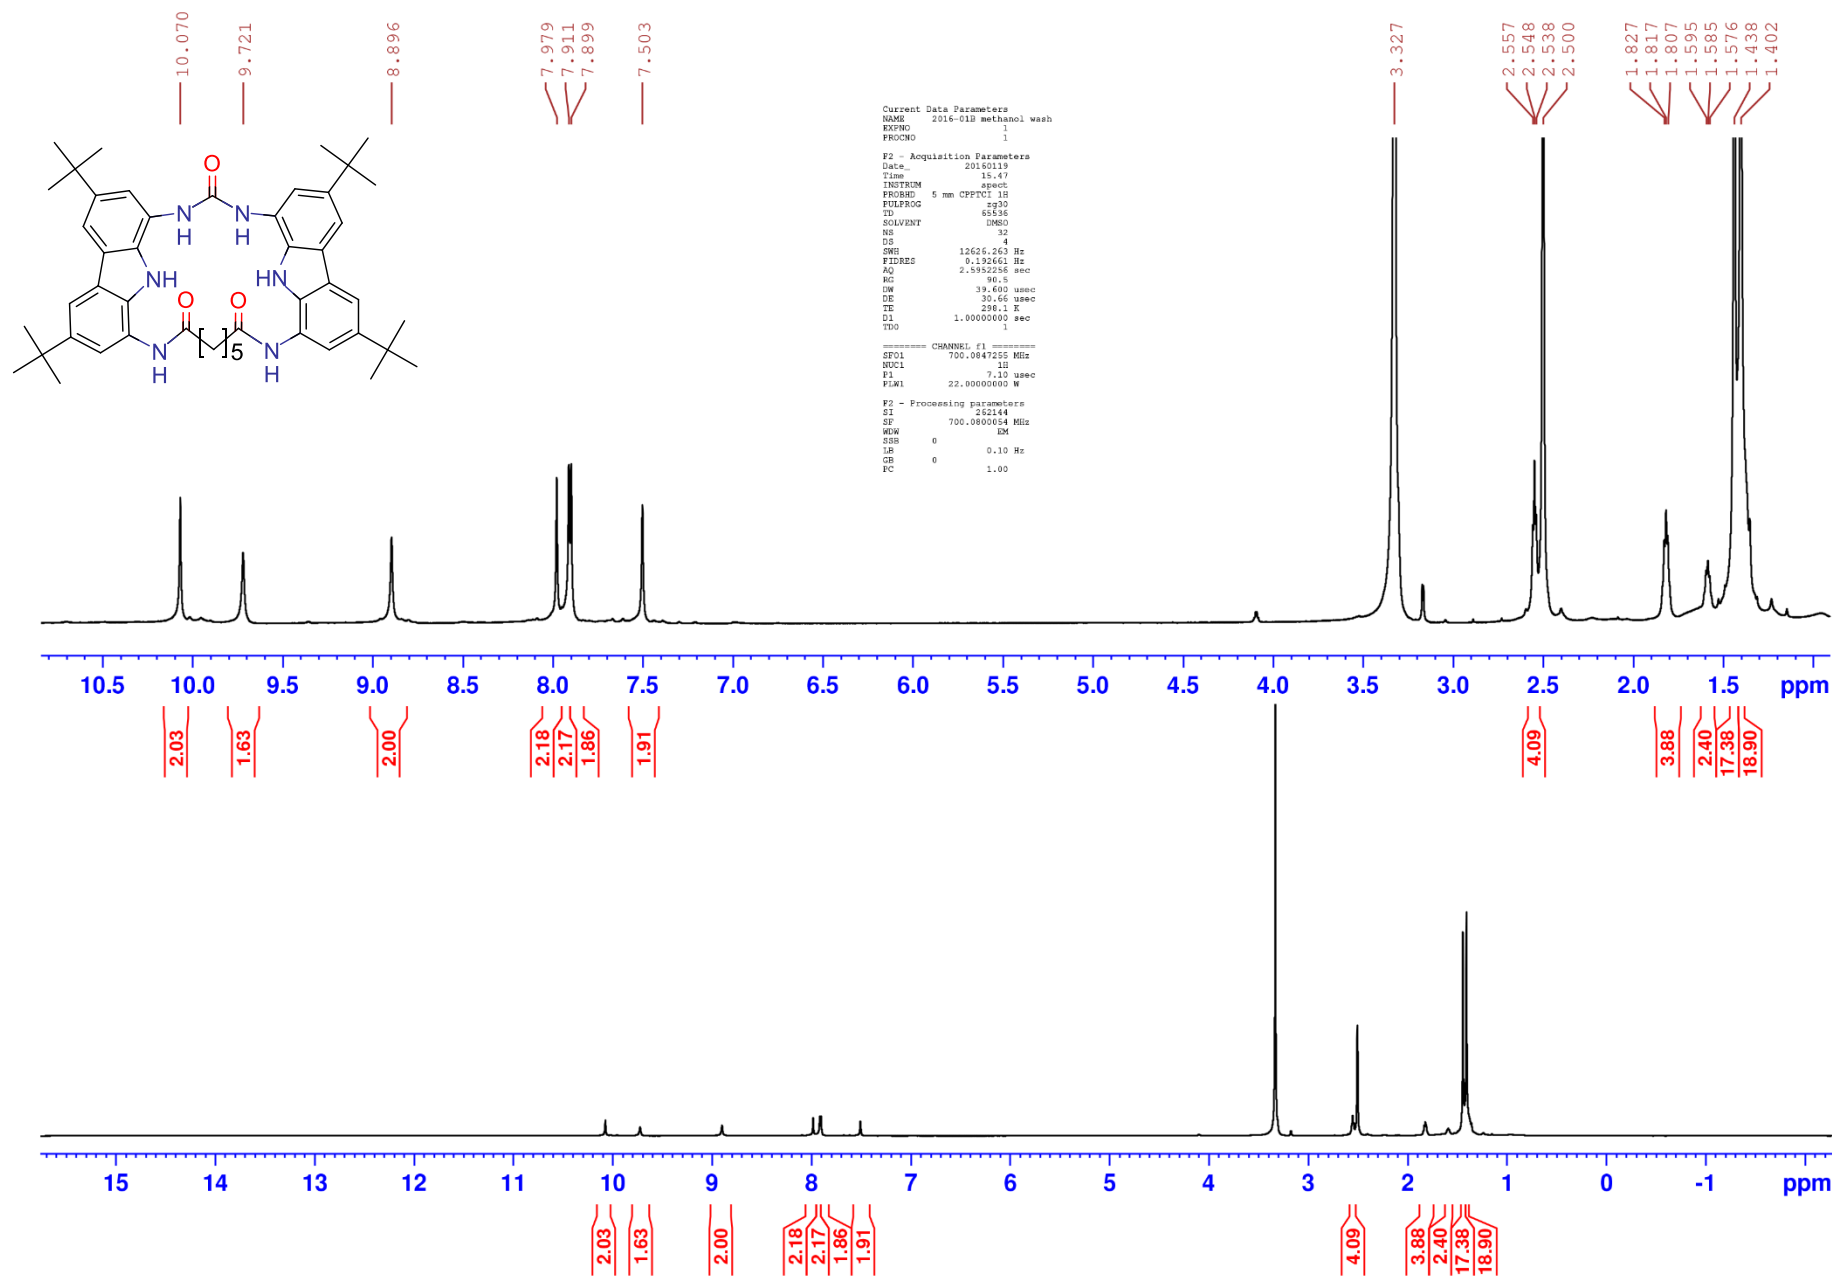



<sup>13</sup>C NMR spectrum (700.1 MHz) of compound **MC005**

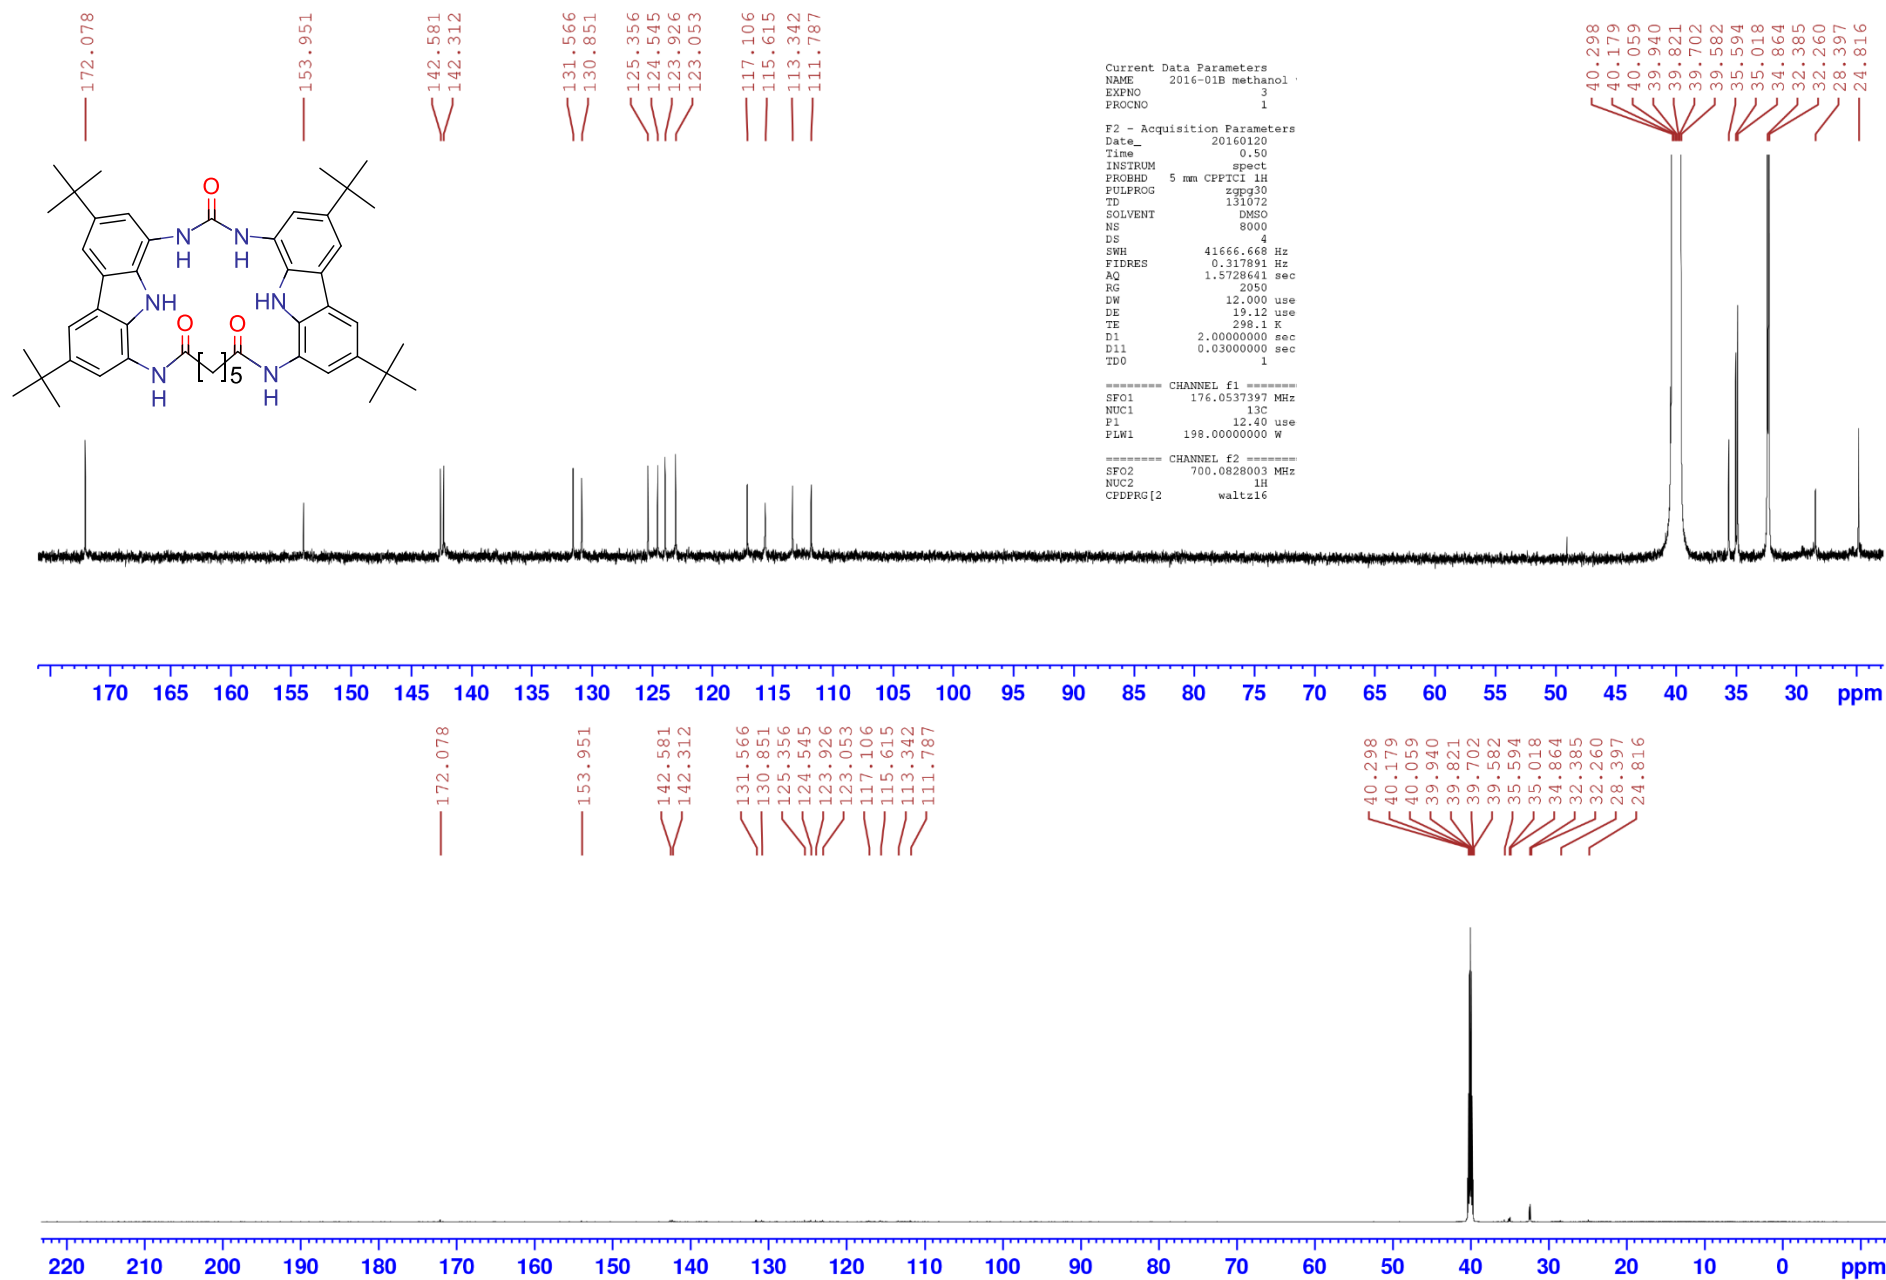

$^1\text{H}$ - $^{13}\text{C}$  HSQC spectrum (700.1 MHz) of compound **MC005**

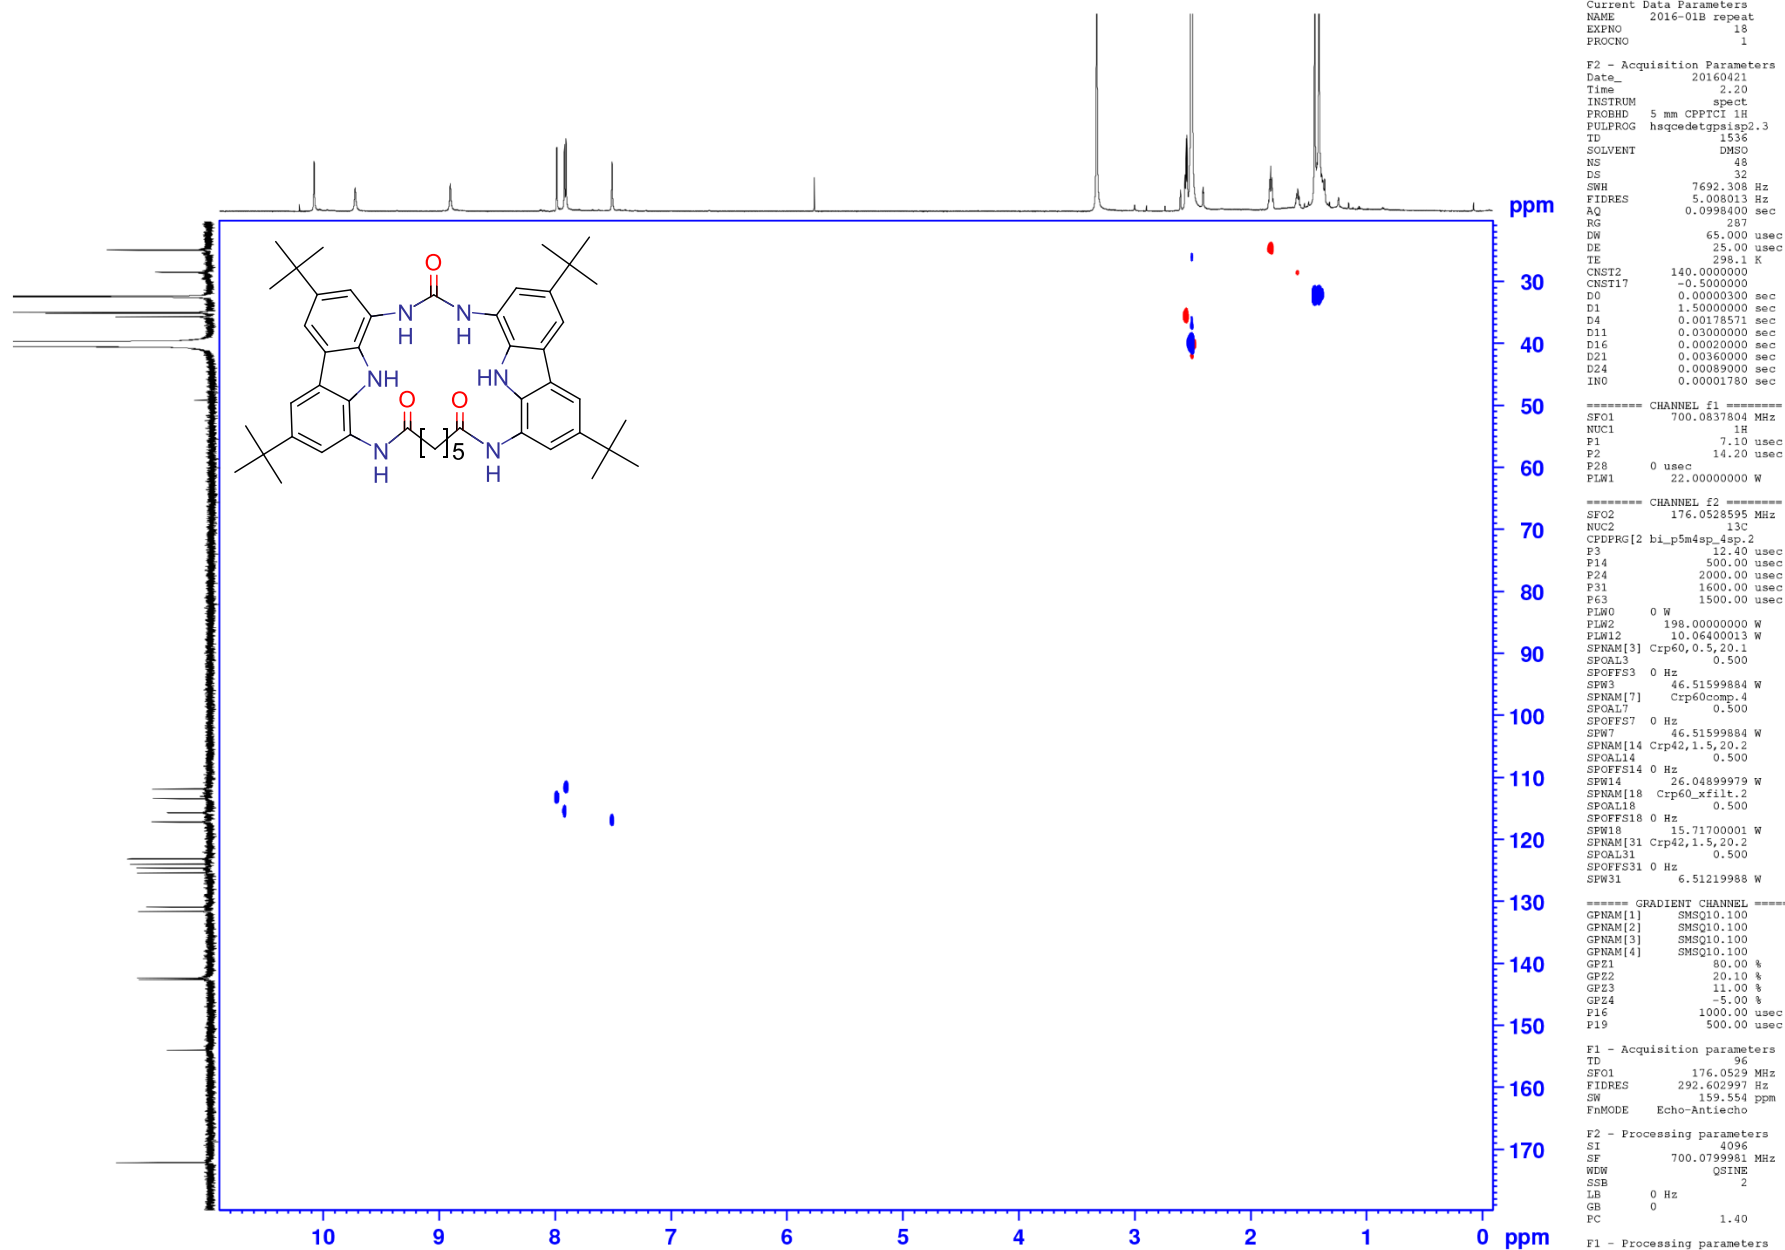

$^1\text{H}$ - $^{13}\text{C}$  HMBC spectrum (700.1 MHz) of compound **MC005**

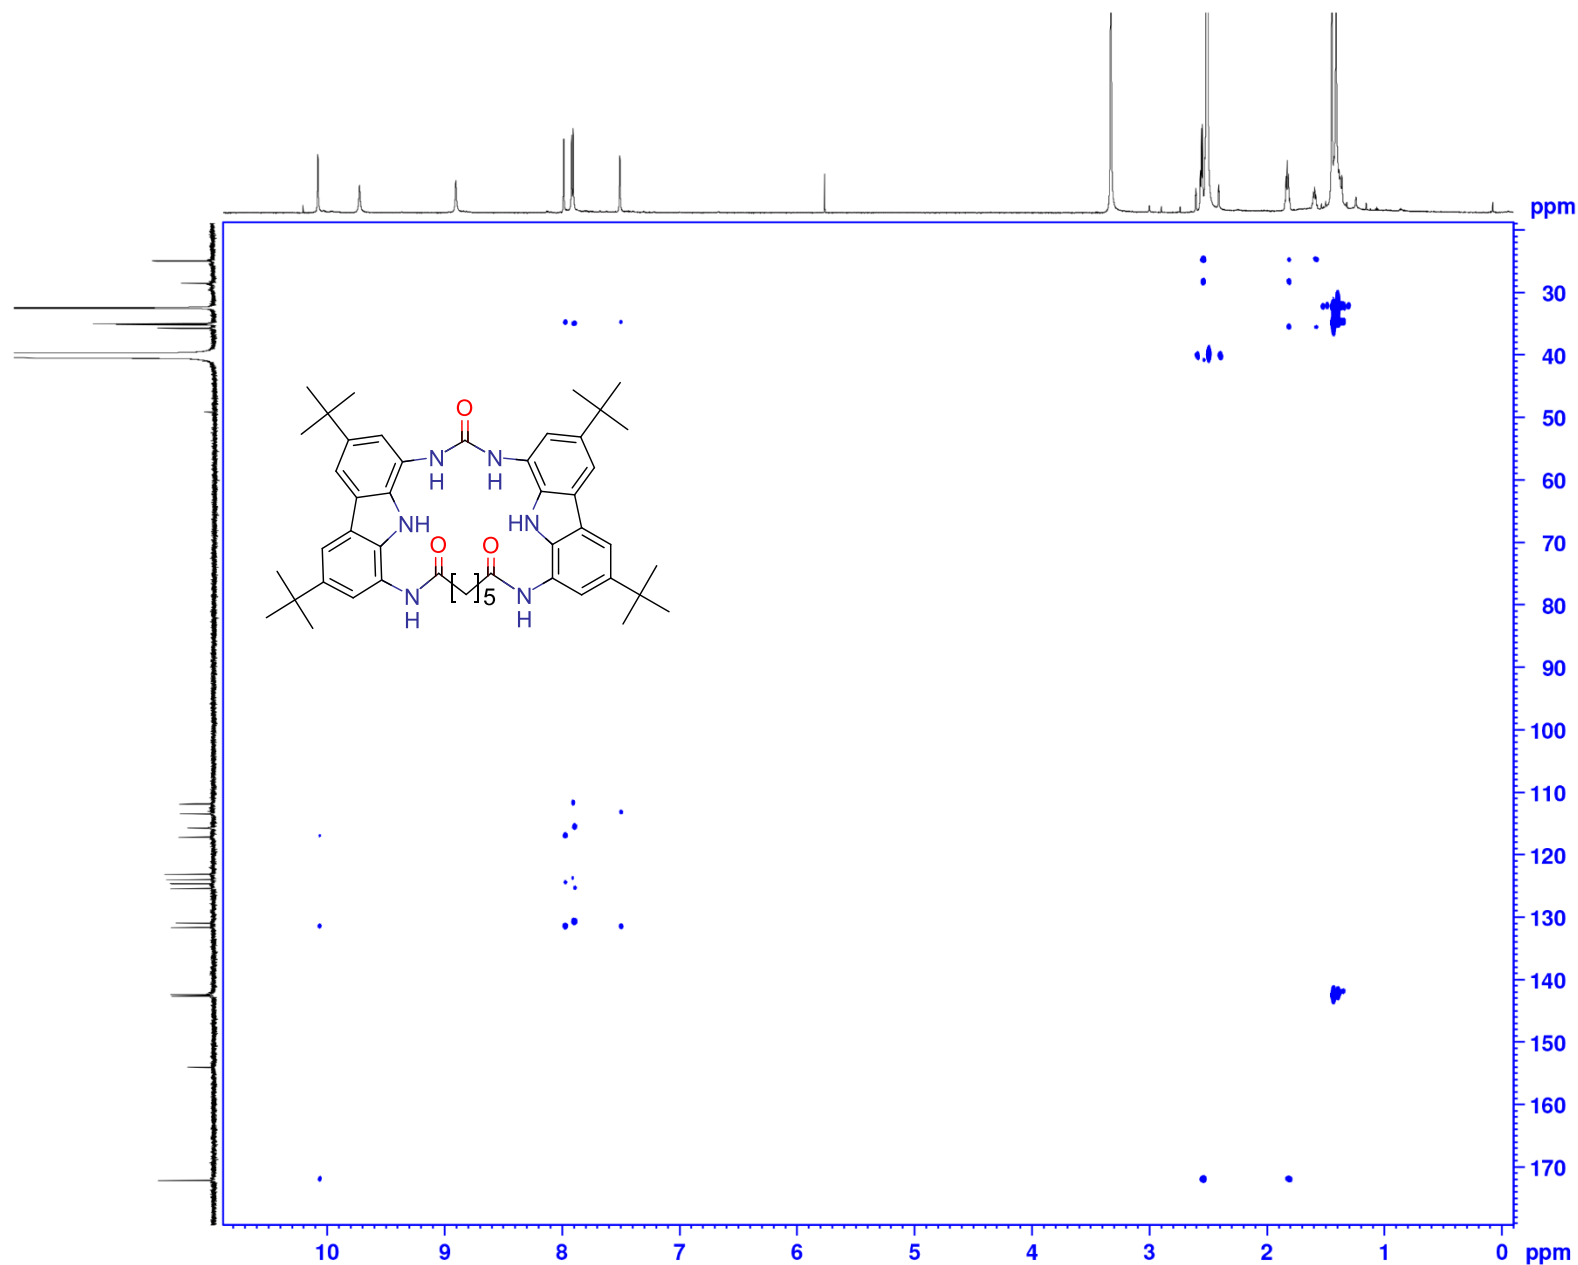

Current Data Parameters  
NAME 2016-01B repeat  
EXPNO 17  
PROCNO 1

F2 - Acquisition Parameters  
Date\_ 20160420  
Time 19.08  
INSTRUM spect  
PROBHD 5 mm CPPTCI 1H  
PULPROG hmbcgp1pndqf  
TD 3072  
SOLVENT DMSO  
NS 64  
DS 16  
SWH 7692.308 Hz  
FIDRES 2.504006 Hz  
AQ 0.1996800 sec  
RG 812  
DW 65.000 usec  
DE 25.00 usec  
TE 298.2 K  
CNST2 145.0000000  
CNST13 8.0000000  
D0 0.00000300 sec  
D1 1.29999995 sec  
D2 0.00344828 sec  
D6 0.06250000 sec  
D16 0.00020000 sec  
INO 0.00001770 sec

===== CHANNEL f1 =====  
SFO1 700.0837804 MHz  
NUC1 1H  
P1 7.10 usec  
P2 14.20 usec  
PLW1 22.00000000 W

===== CHANNEL f2 =====  
SFO2 176.0526835 MHz  
NUC2 13C  
P3 12.40 usec  
PLW2 198.00000000 W

===== GRADIENT CHANNEL =====  
GPNAM[1] SMSQ10.100  
GPNAM[2] SMSQ10.100  
GPNAM[3] SMSQ10.100  
GPZ1 50.00 %  
GPZ2 30.00 %  
GPZ3 40.10 %  
FIG 1000.00 usec

F1 - Acquisition parameters  
TD 256  
SFO1 176.0527 MHz  
FIDRES 110.346046 Hz  
SW 160.455 ppm  
FnMODE QF

F2 - Processing parameters  
SI 4096  
SF 700.0800053 MHz  
WDW SINE  
SSB 0  
LB 0 Hz  
GB 0  
PC 1.40

F1 - Processing parameters  
SI 512  
MC2 QF  
SF 176.0352560 MHz  
WDW SINE  
SSB 0  
LB 0 Hz  
GB 0

HRMS spectrum of compound **MC005**

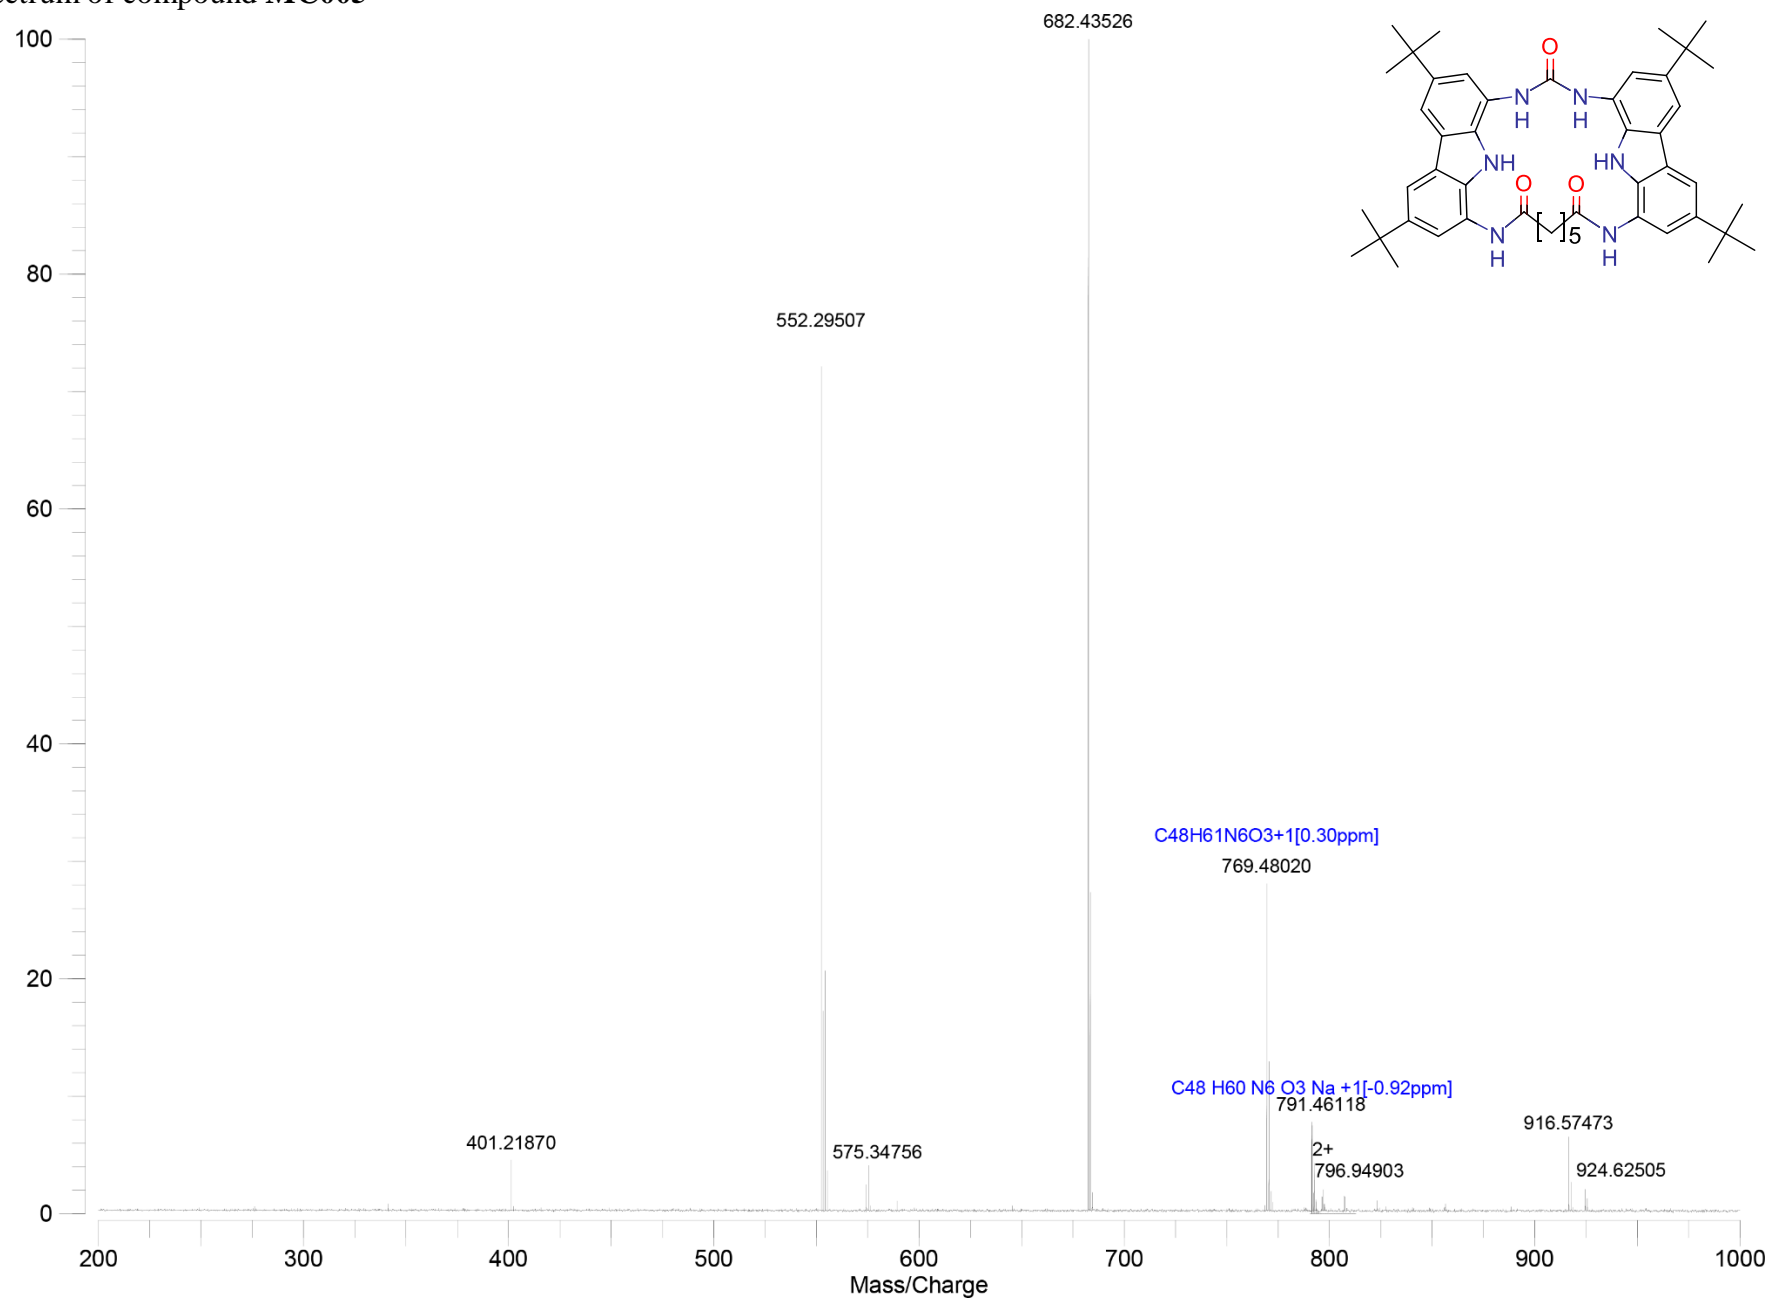

<sup>1</sup>H NMR spectrum (700.1 MHz) of compound **MC006**

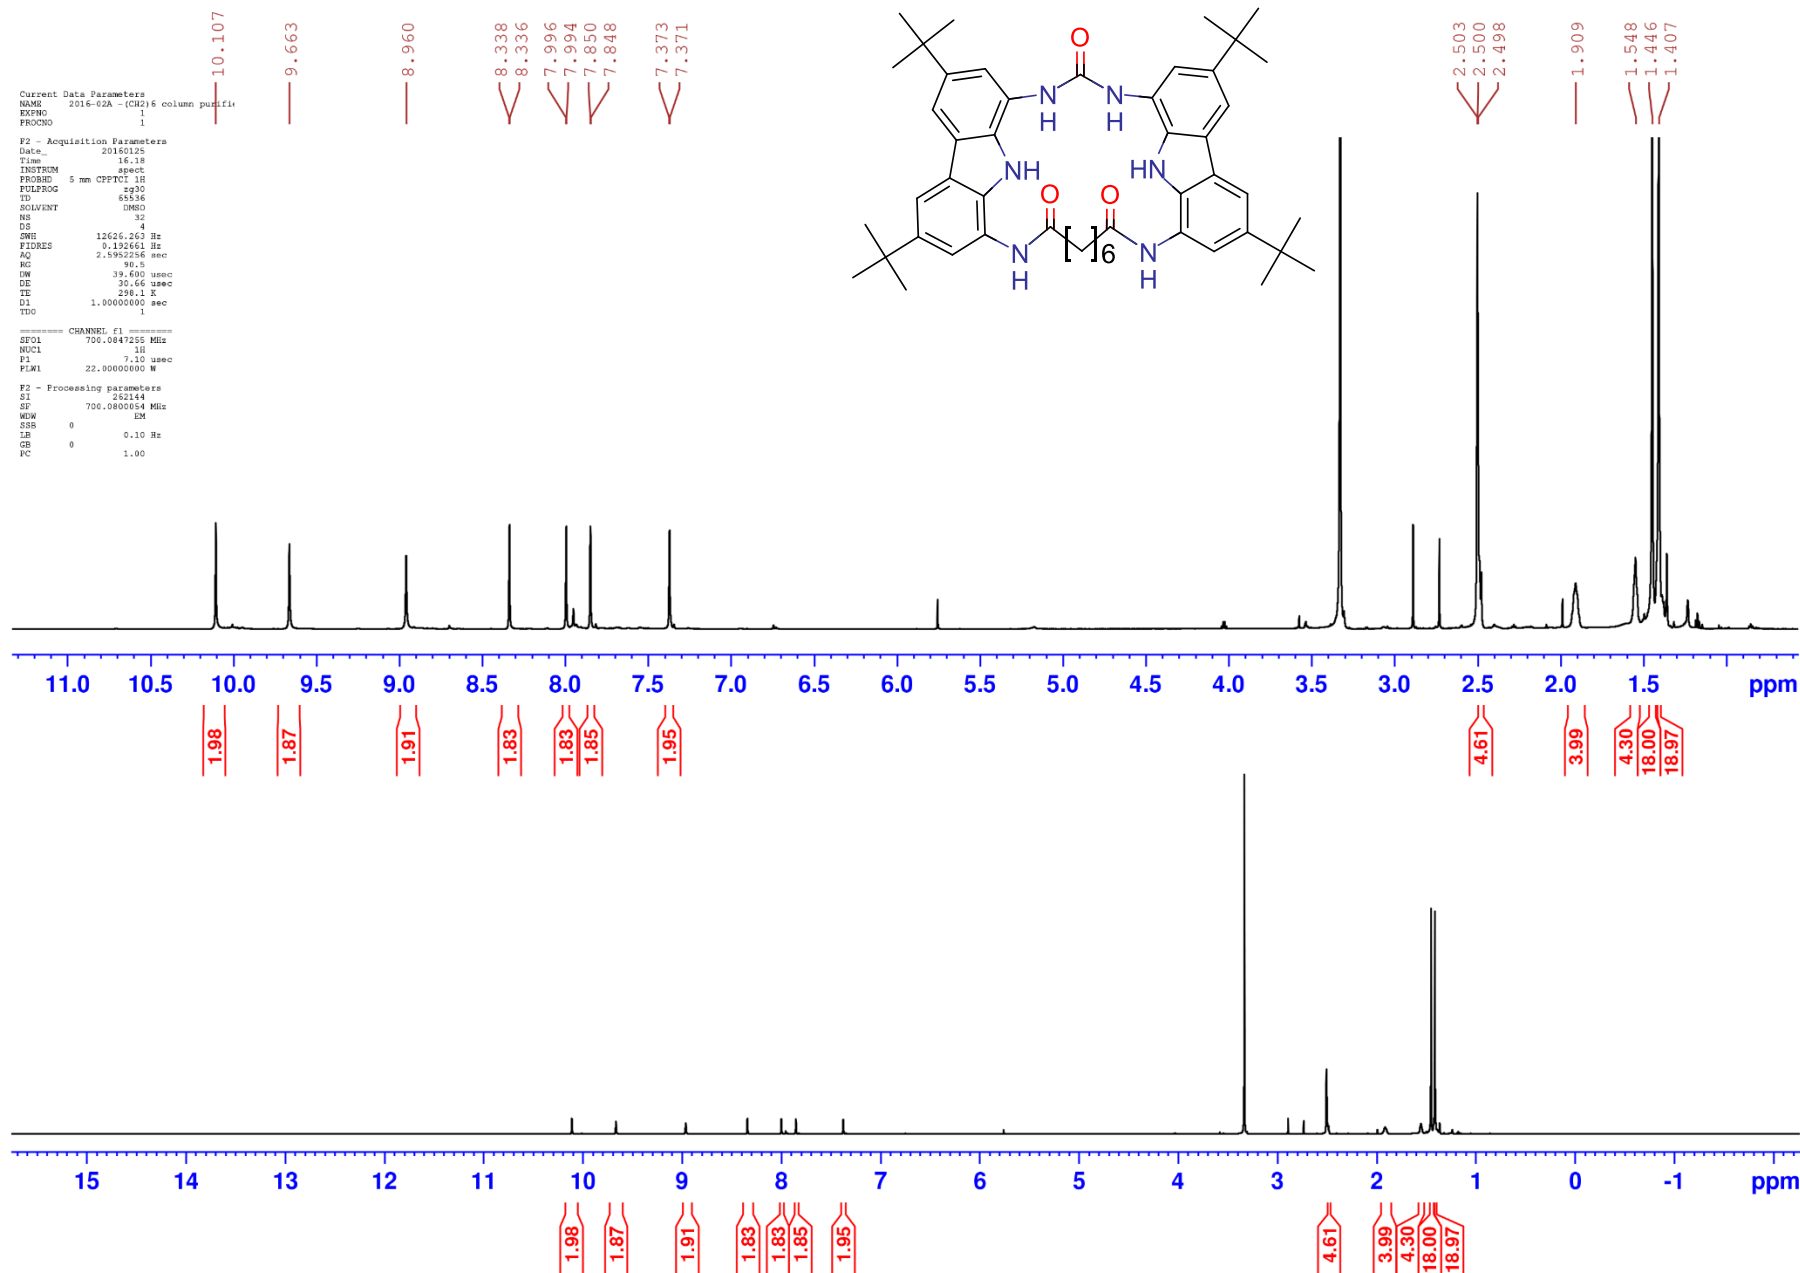

<sup>13</sup>C NMR spectrum (700.1 MHz) of compound **MC006**

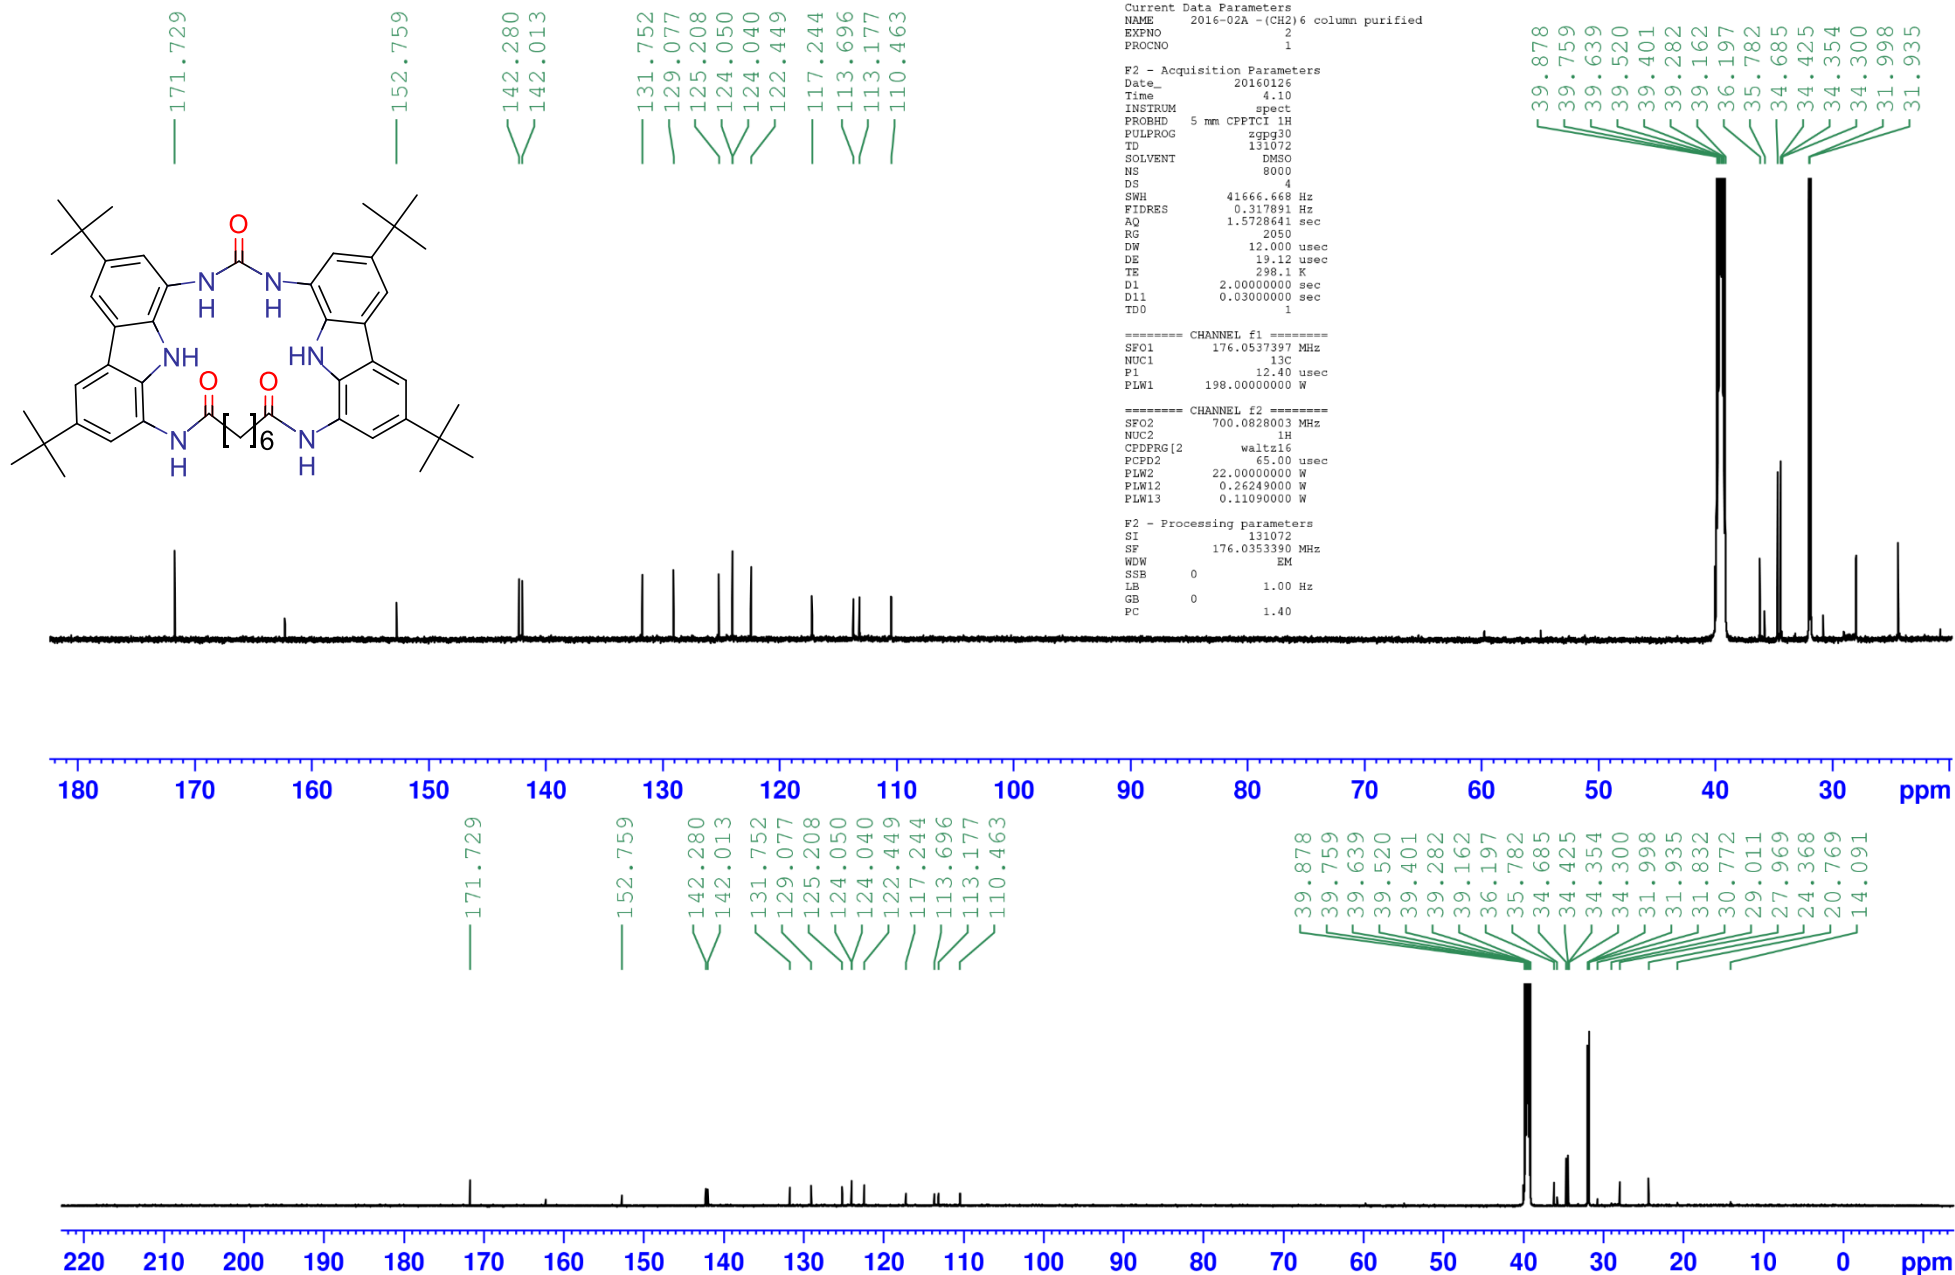

$^1\text{H}$ - $^{13}\text{C}$  HSQC spectrum (700.1 MHz) of compound **MC006**

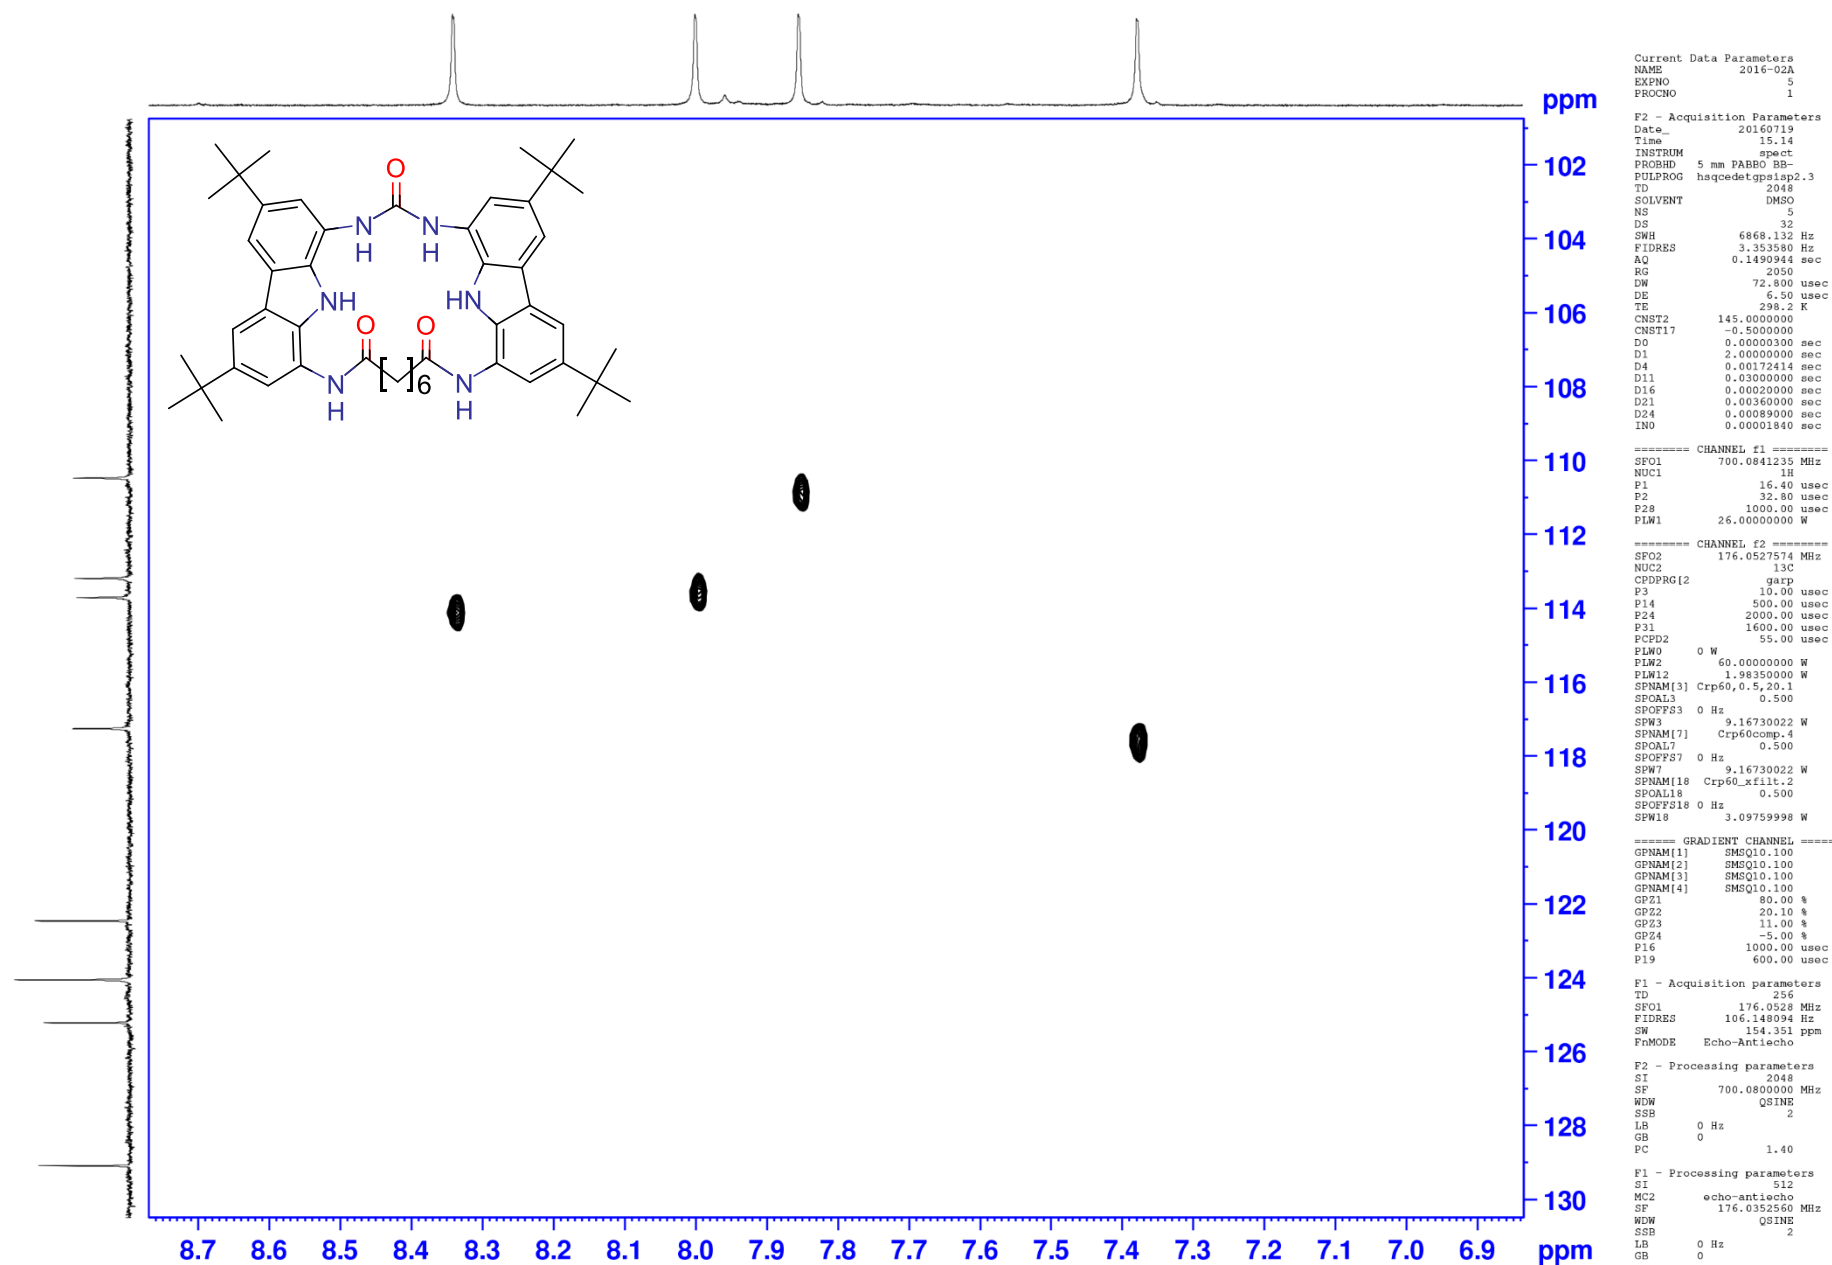

$^1\text{H}$ - $^{13}\text{C}$  HMBC spectrum (700.1 MHz) of compound **MC006**

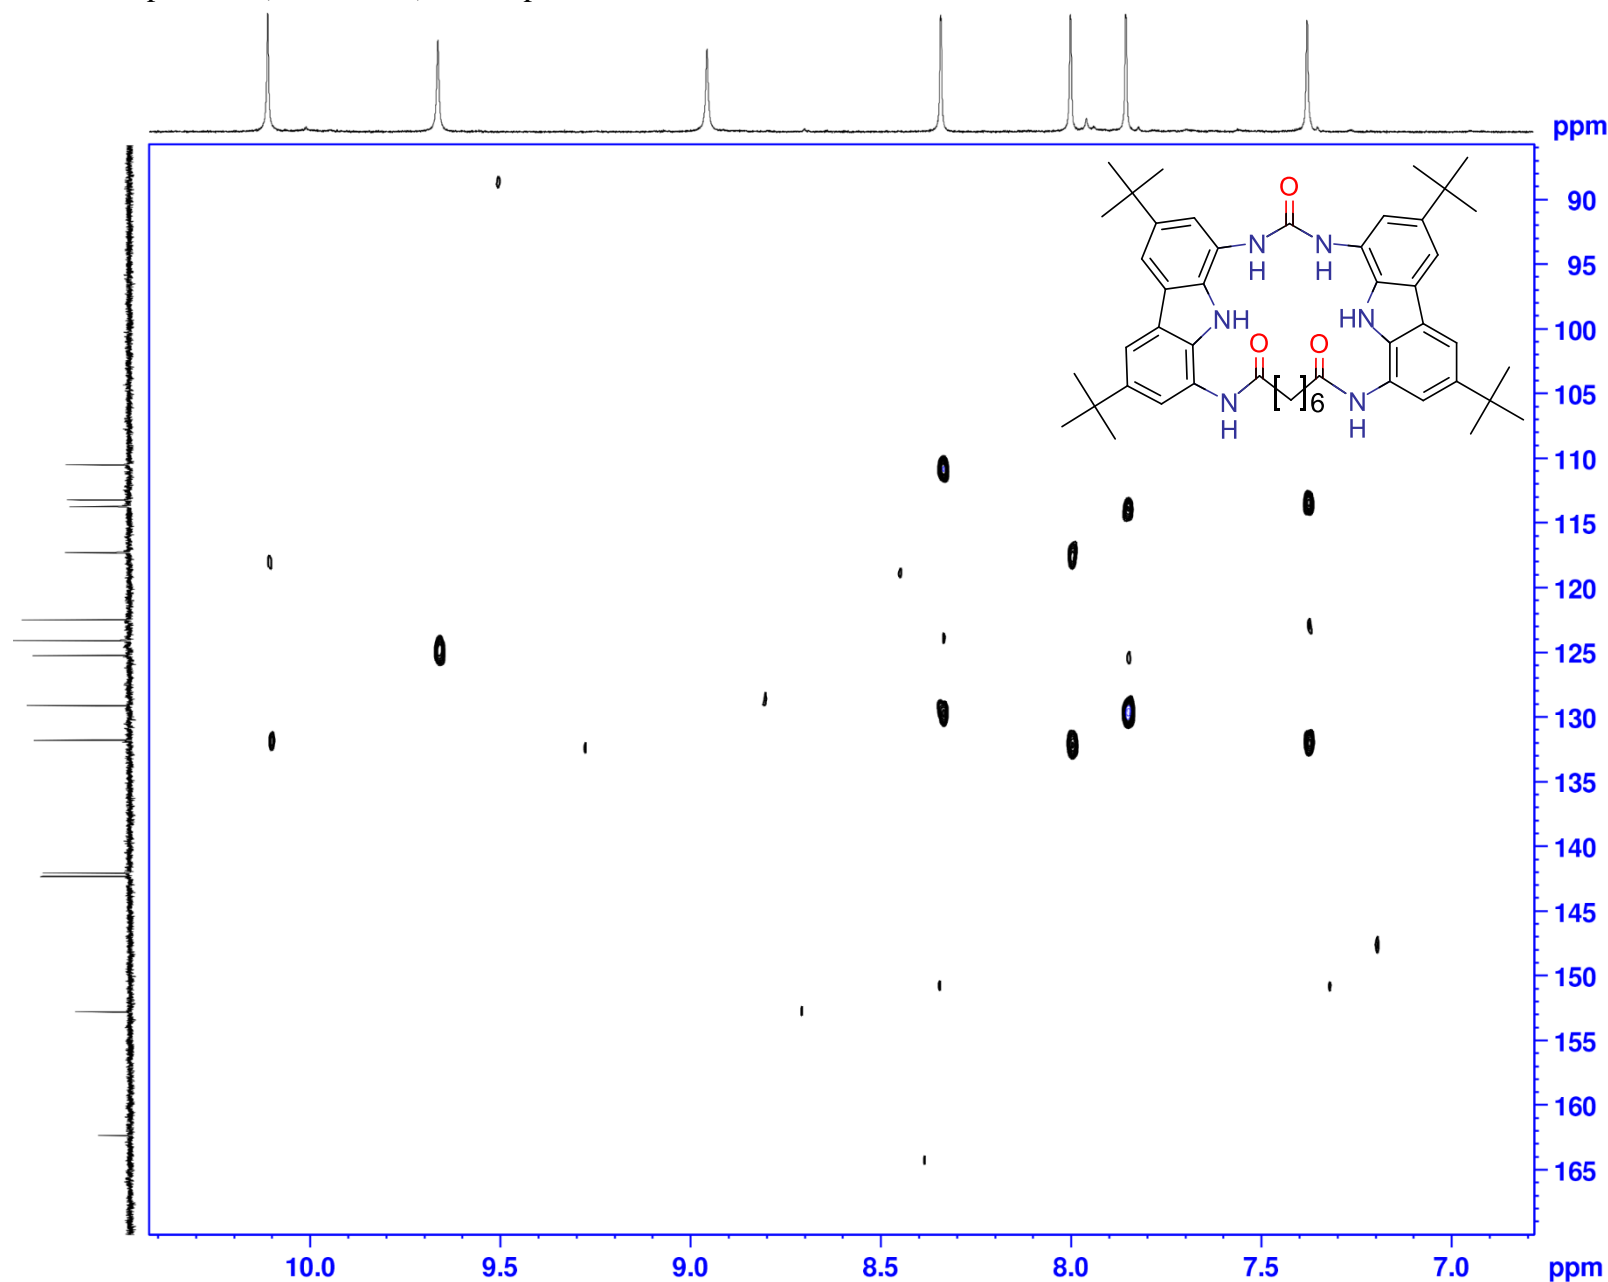

Current Data Parameters  
NAME 2016-02A  
EXPNO 6  
PROCNO 1

F2 - Acquisition Parameters  
Date\_ 20160719  
Time 16.02  
INSTRUM spect  
PROBHD 5 mm PABBO BB-  
PULPROG hmbcgp1pndqf  
TD 2048  
SOLVENT DMSO  
NS 16  
DS 16  
SWH 7142.857 Hz  
FIDRES 3.487723 Hz  
AQ 0.1433600 sec  
RG 2050  
DW 70.000 usec  
DE 6.50 usec  
TE 298.1 K  
CNST2 145.0000000  
CNST13 10.0000000  
D0 0.00000300 sec  
D1 1.50573397 sec  
D2 0.00344828 sec  
D6 0.05000000 sec  
D16 0.00020000 sec  
INO 0.00001840 sec

===== CHANNEL f1 =====  
SFO1 700.0839485 MHz  
NUC1 1H  
P1 16.40 usec  
P2 32.80 usec  
PLW1 26.00000000 W

===== CHANNEL f2 =====  
SFO2 176.0527574 MHz  
NUC2 13C  
P3 10.00 usec  
PLW2 60.00000000 W

===== GRADIENT CHANNEL =====  
GPNAM[1] SMSQ10.100  
GPNAM[2] SMSQ10.100  
GPNAM[3] SMSQ10.100  
GPZ1 50.00 %  
GPZ2 30.00 %  
GPZ3 40.10 %  
P16 1000.00 usec

F1 - Acquisition parameters  
TD 87  
SFO1 176.0528 MHz  
FIDRES 312.343842 Hz  
SW 154.351 ppm  
FnMODE QF

F2 - Processing parameters  
SI 2048  
SF 700.0800000 MHz  
WDW SINE  
SSB 0  
LB 0 Hz  
GB 0  
PC 1.40

F1 - Processing parameters  
SI 1024  
MC2 QF  
SF 176.0352560 MHz  
WDW SINE  
SSB 0  
LB 0 Hz  
GB 0



# HRMS spectrum of compound MC006

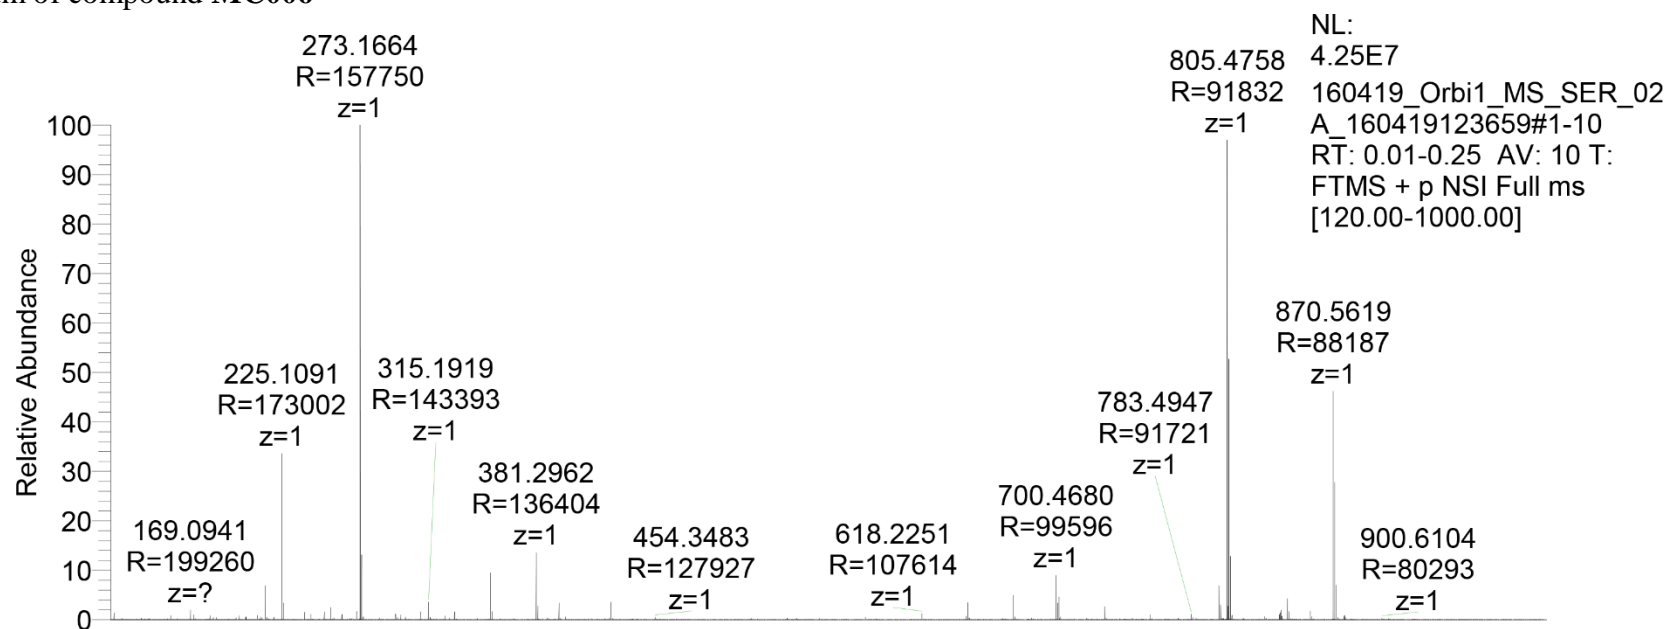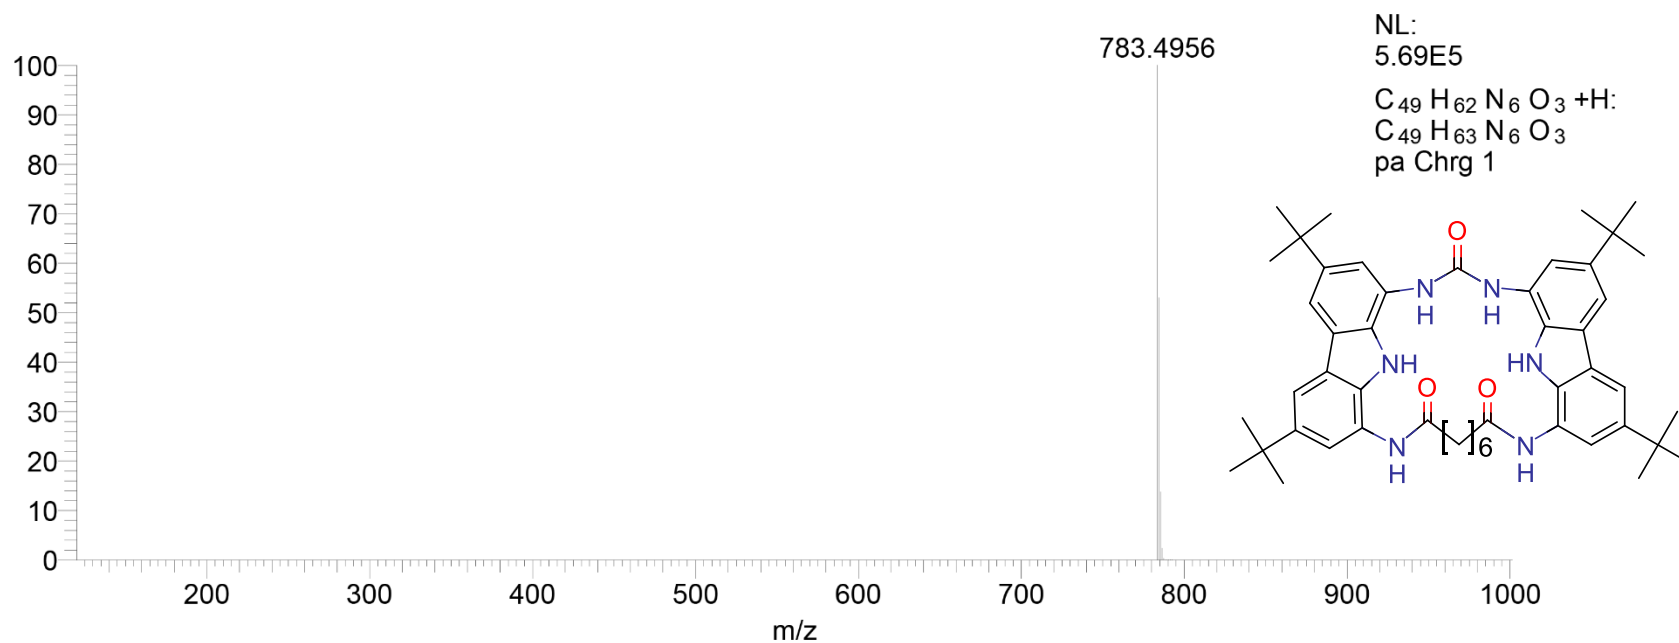

<sup>1</sup>H NMR spectrum (700.1 MHz) of compound **MC007**

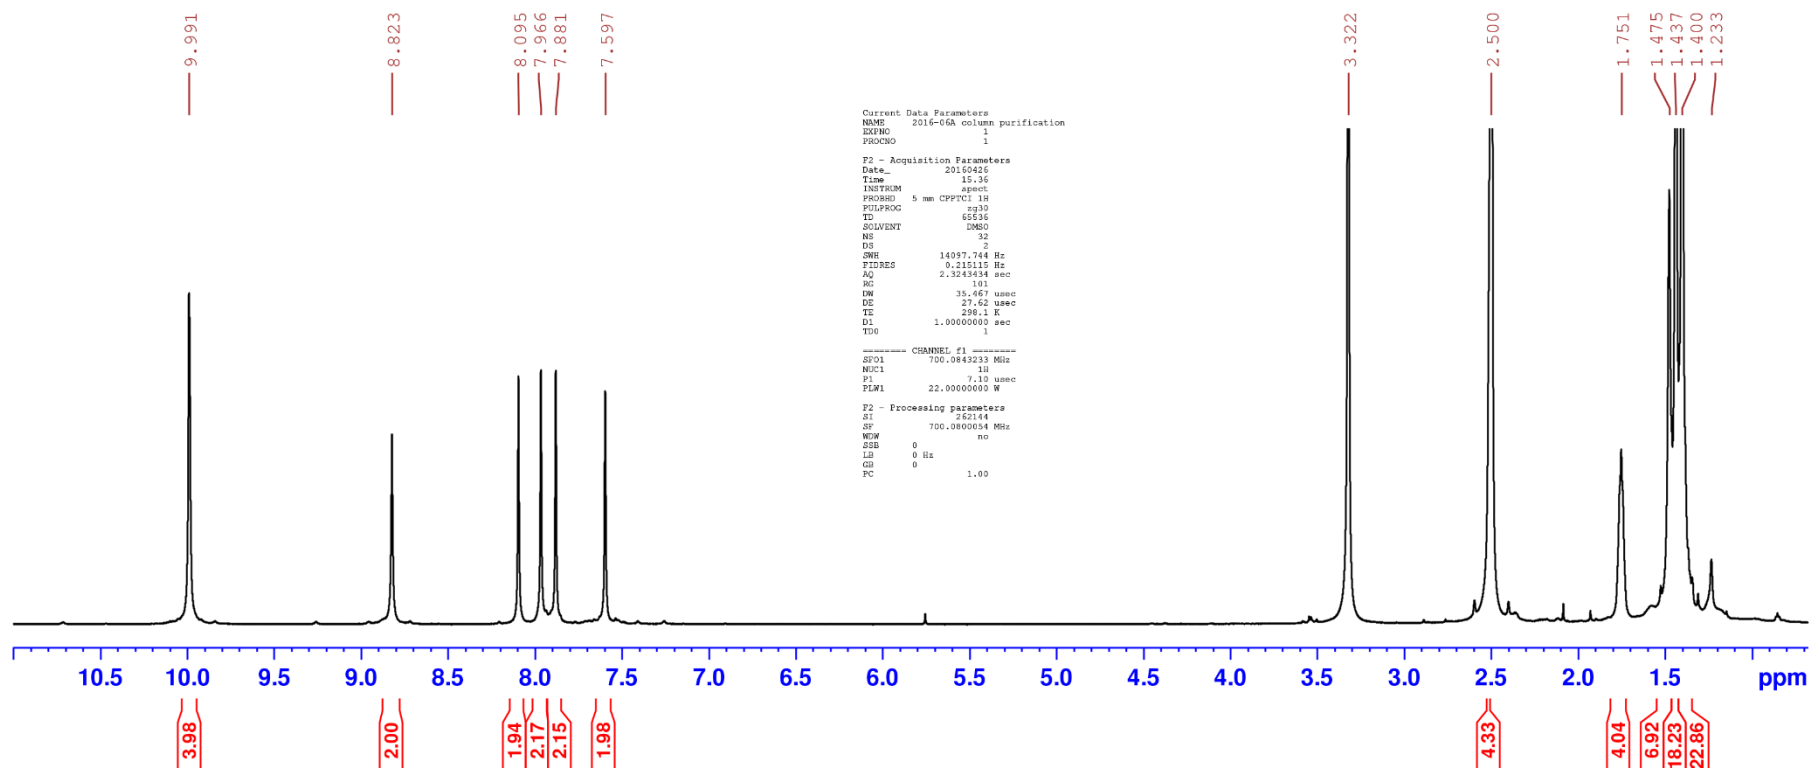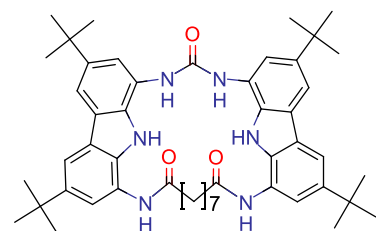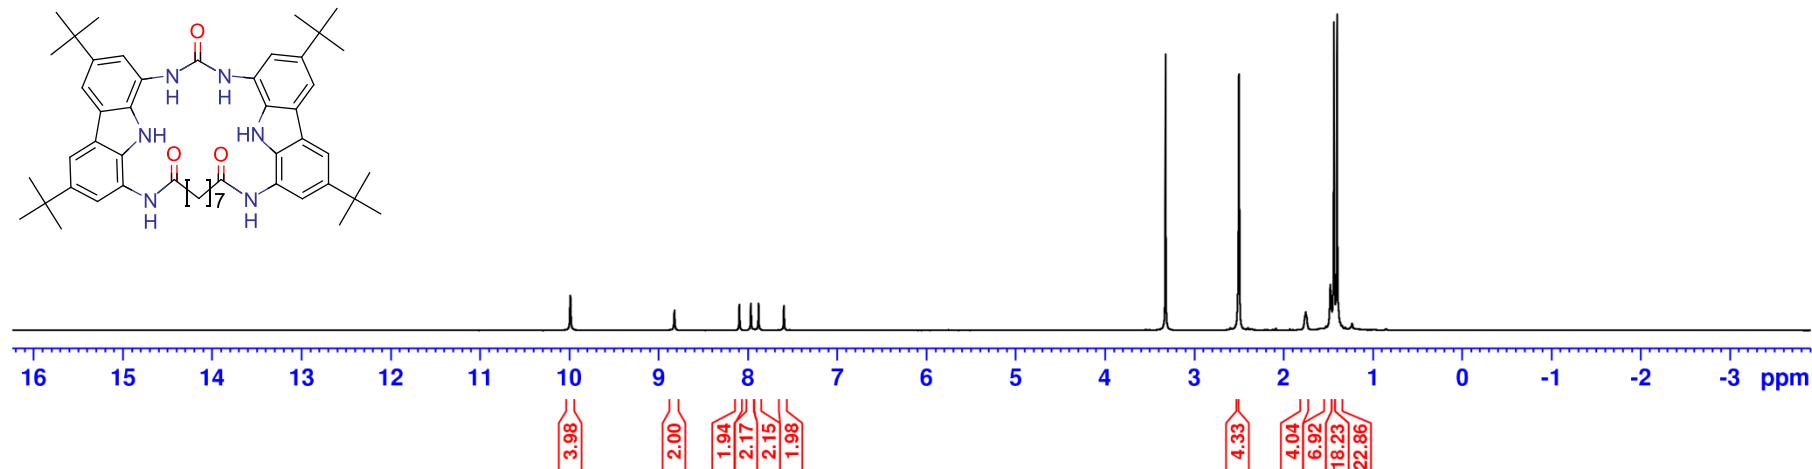

<sup>13</sup>C NMR spectrum (700.1 MHz) of compound **MC007**

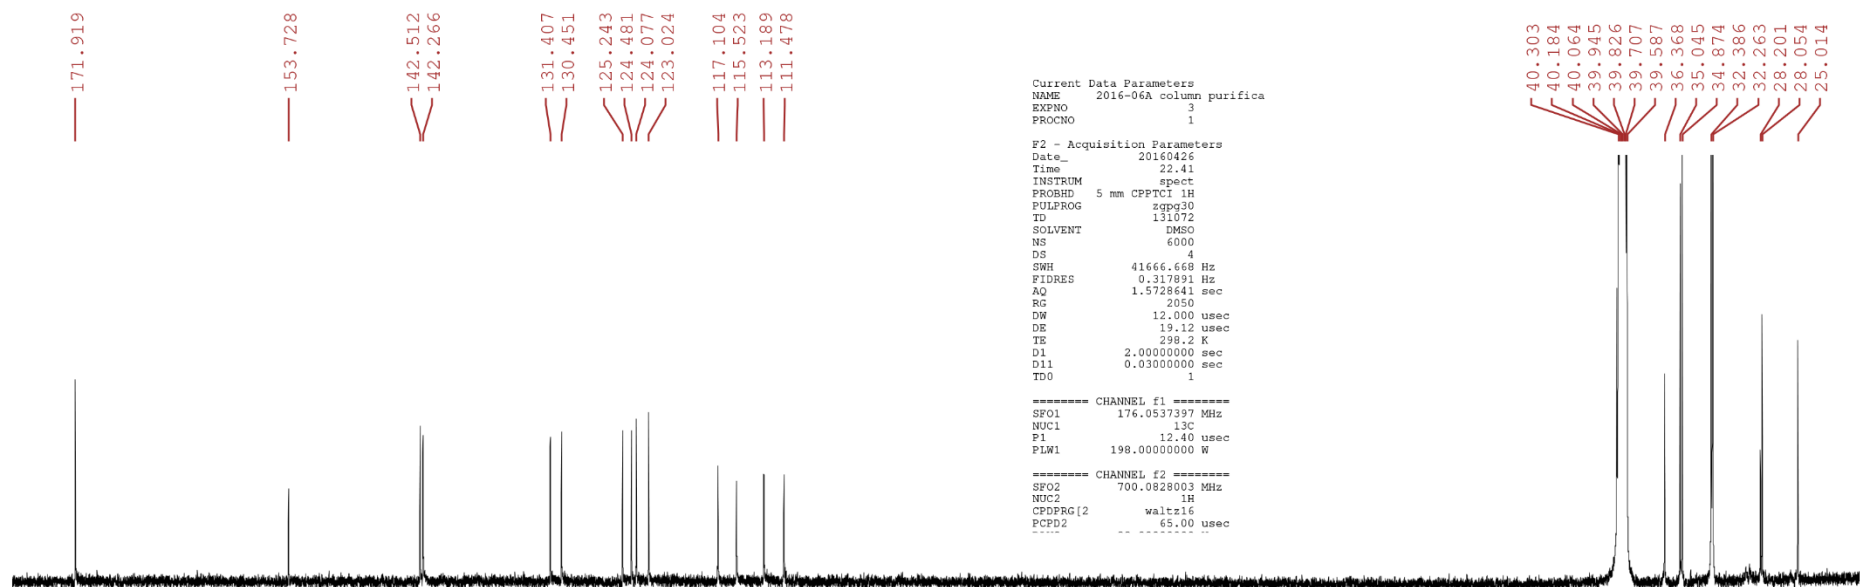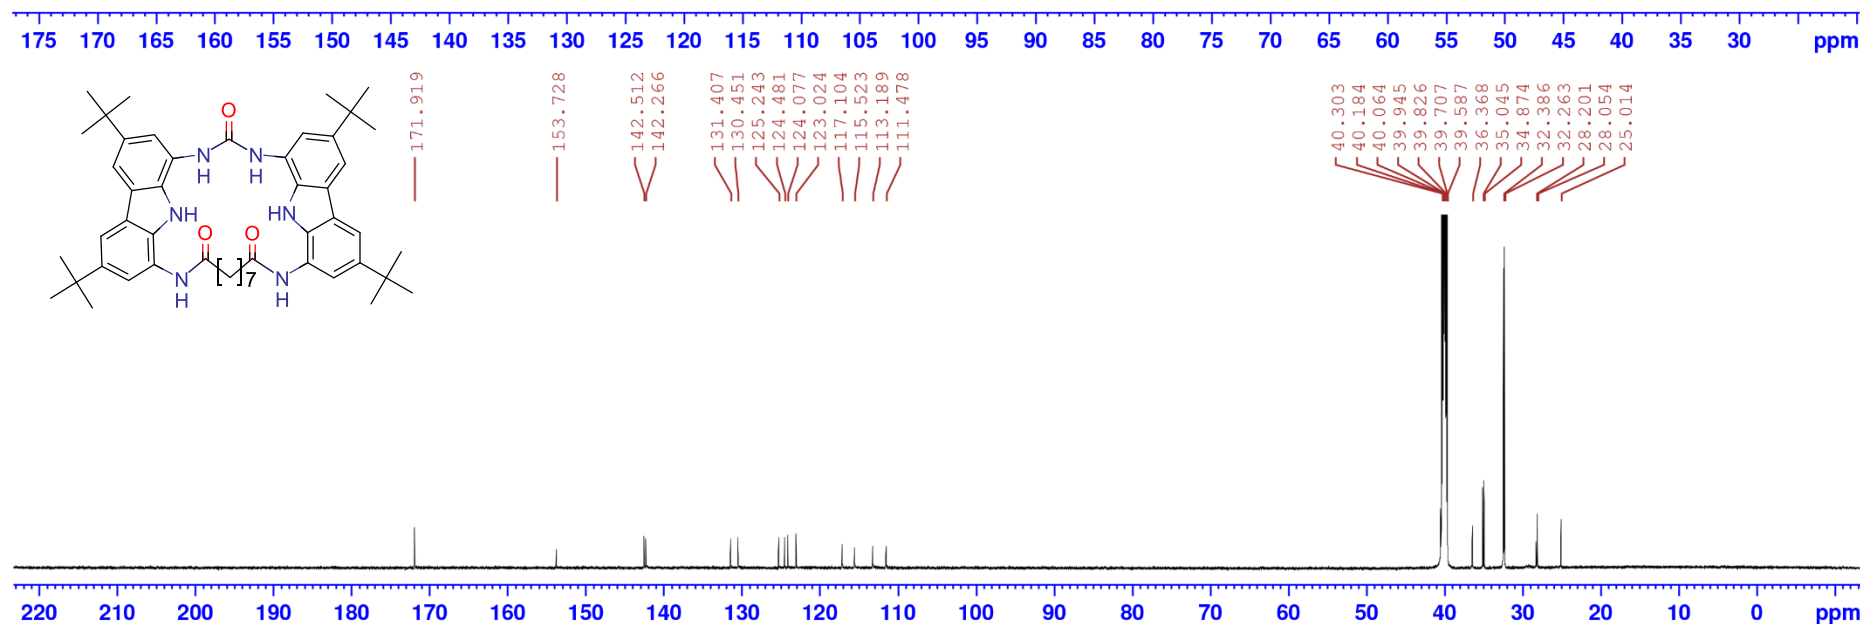

$^1\text{H}$ - $^{13}\text{C}$  HSQC spectrum (700.1 MHz) of compound **MC007**

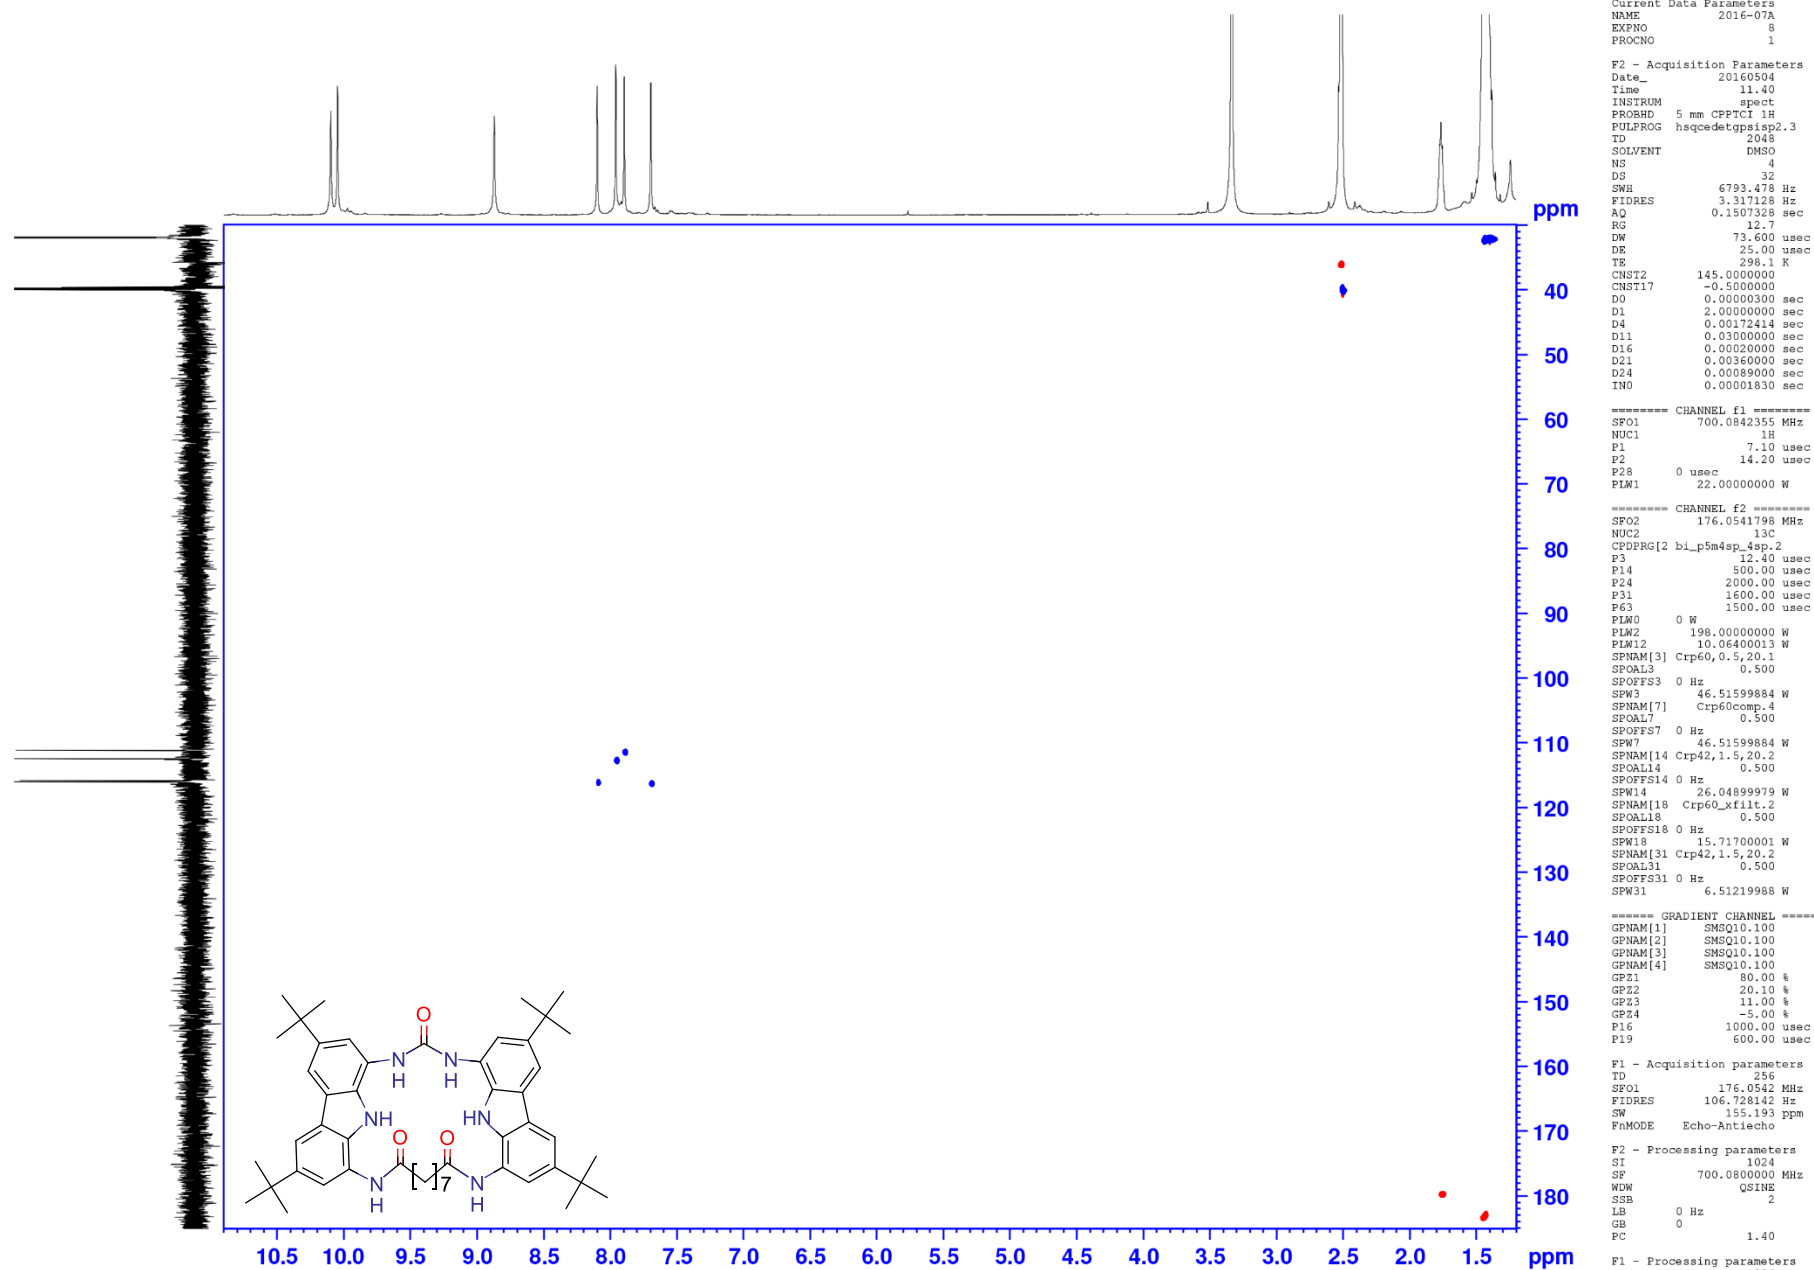

$^1\text{H}$ - $^{13}\text{C}$  HMBC spectrum (700.1 MHz) of compound **MC007**

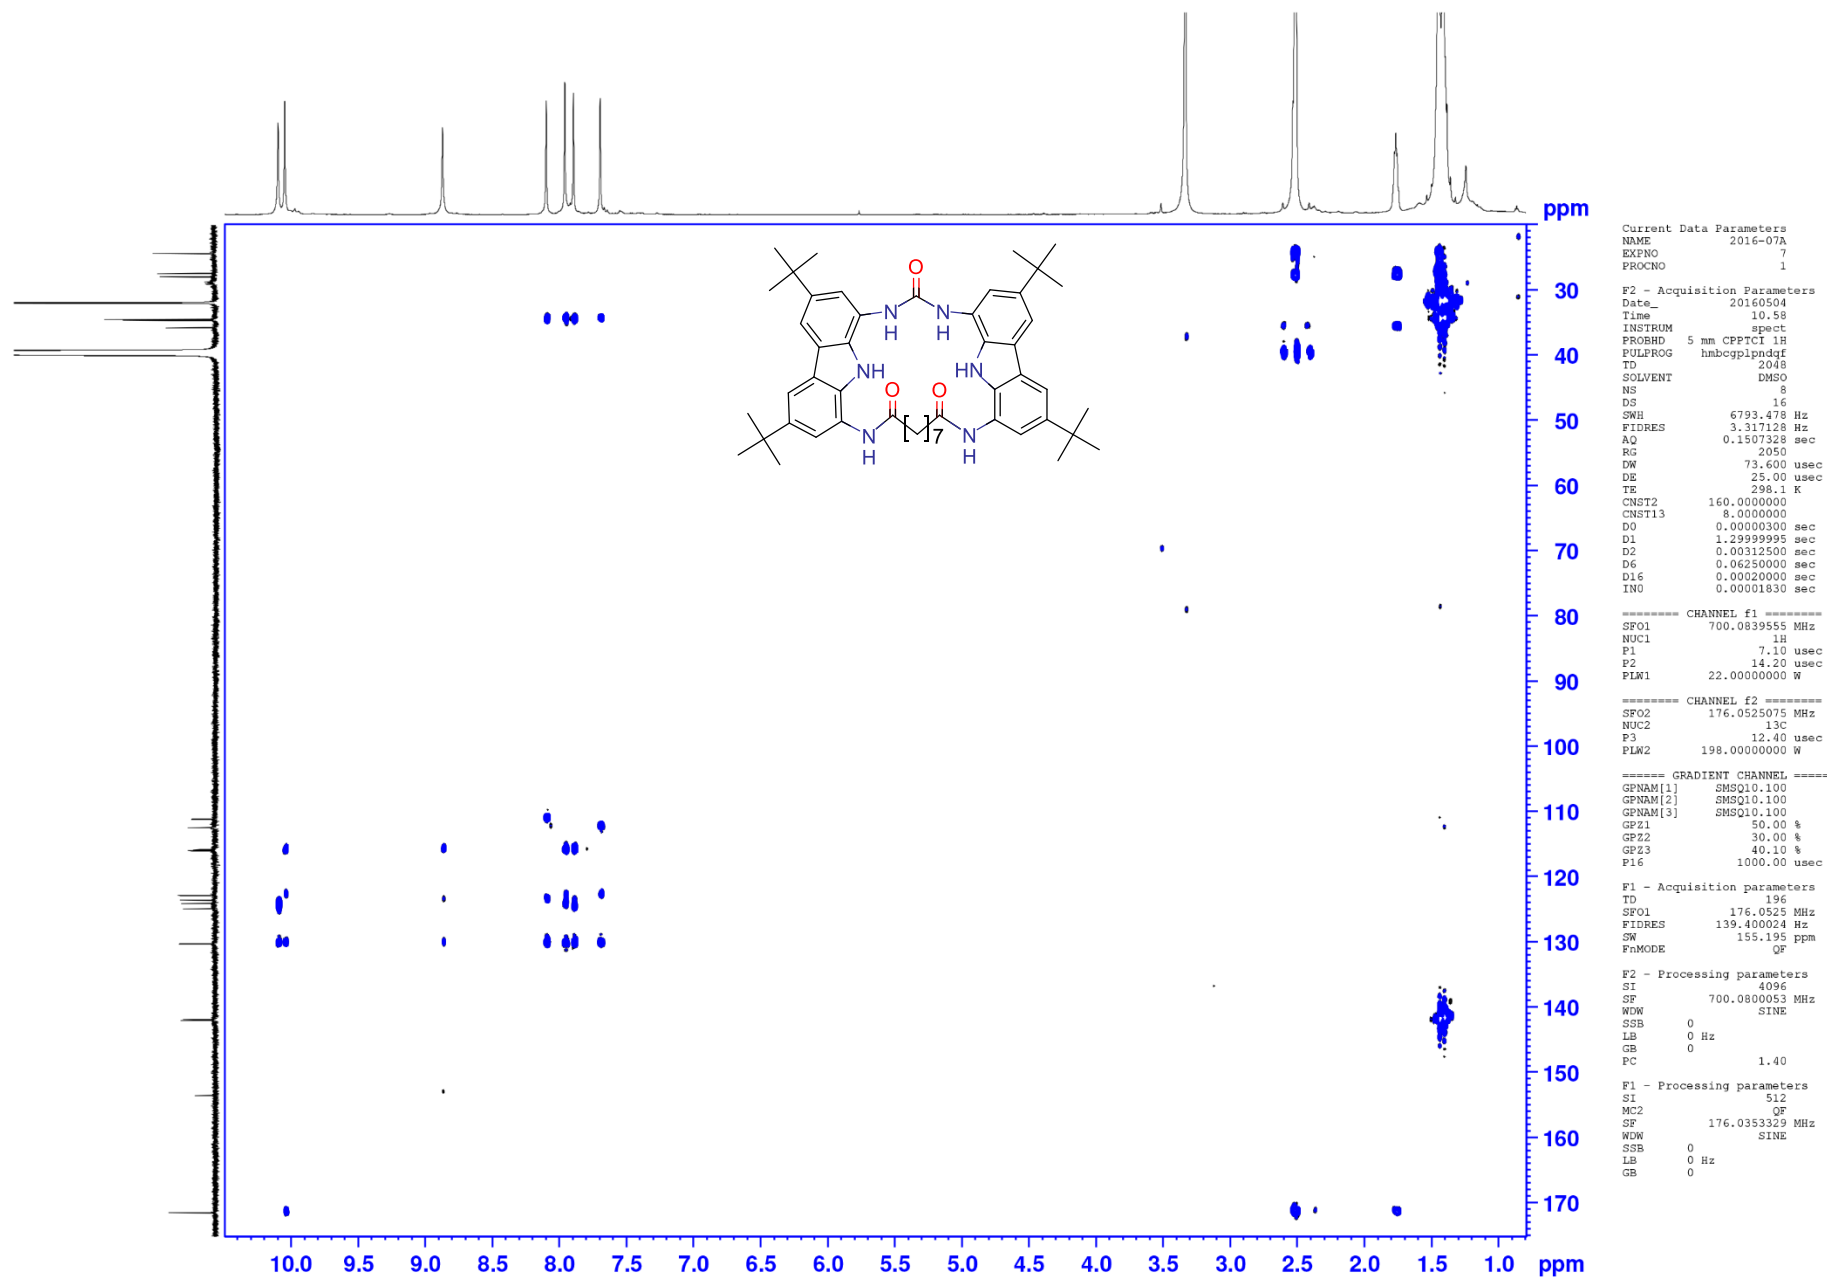

HRMS spectrum of compound **MC007**

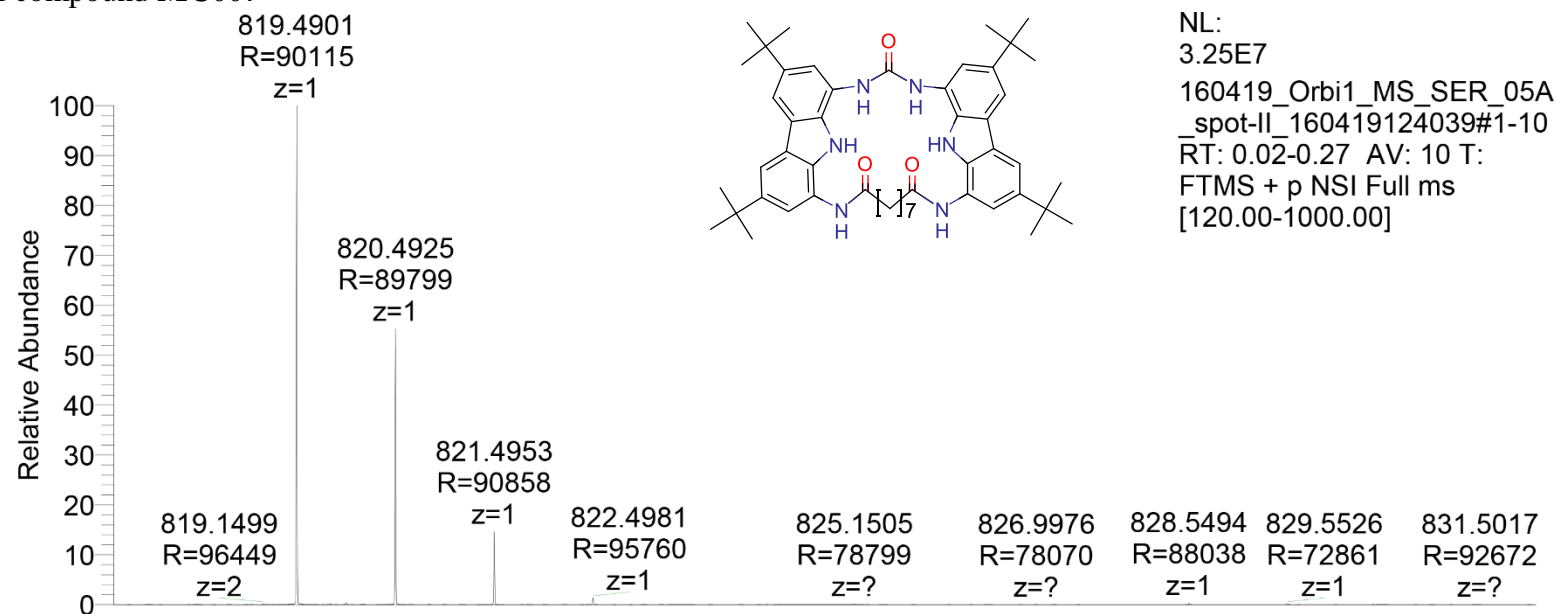

NL:  
3.25E7  
160419\_Orbi1\_MS\_SER\_05A  
\_spot-II\_160419124039#1-10  
RT: 0.02-0.27 AV: 10 T:  
FTMS + p NSI Full ms  
[120.00-1000.00]

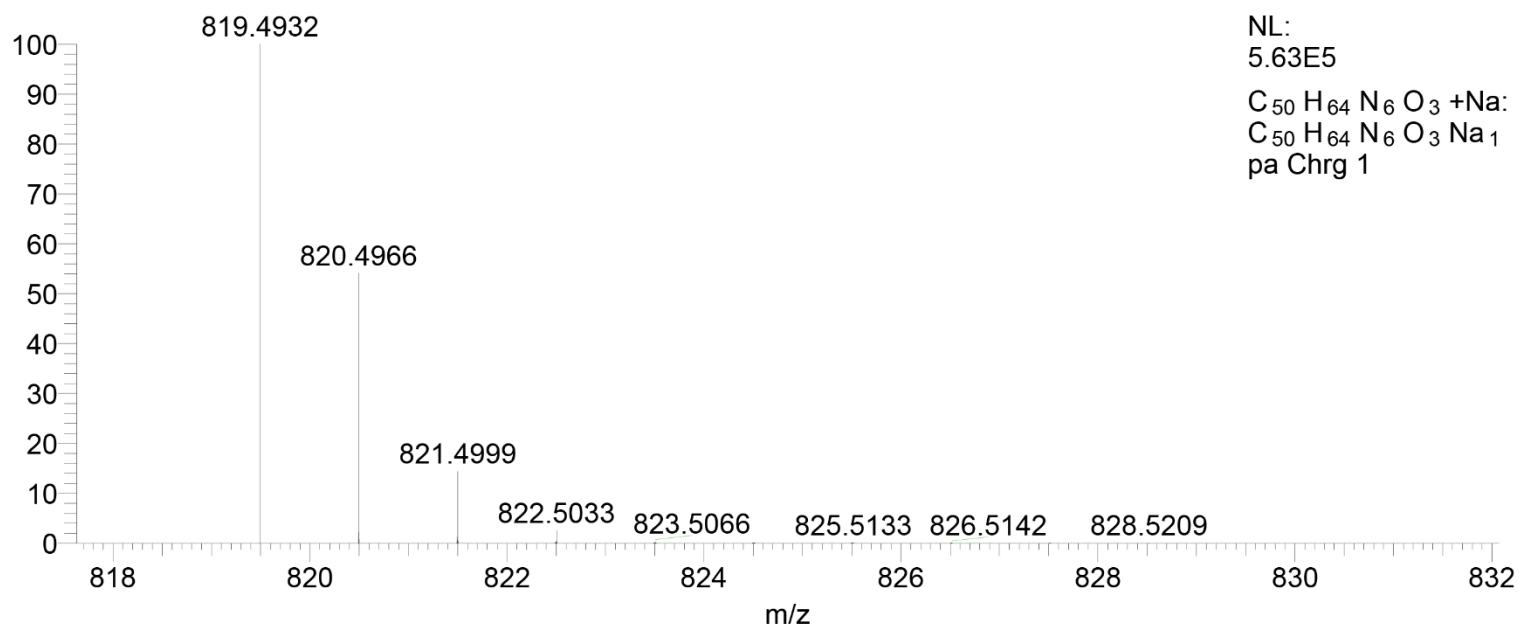

NL:  
5.63E5  
 $C_{50}H_{64}N_6O_3 + Na$ :  
 $C_{50}H_{64}N_6O_3Na_1$   
pa Chrg 1

<sup>1</sup>H NMR spectrum (700.1 MHz) of compound **MC008**

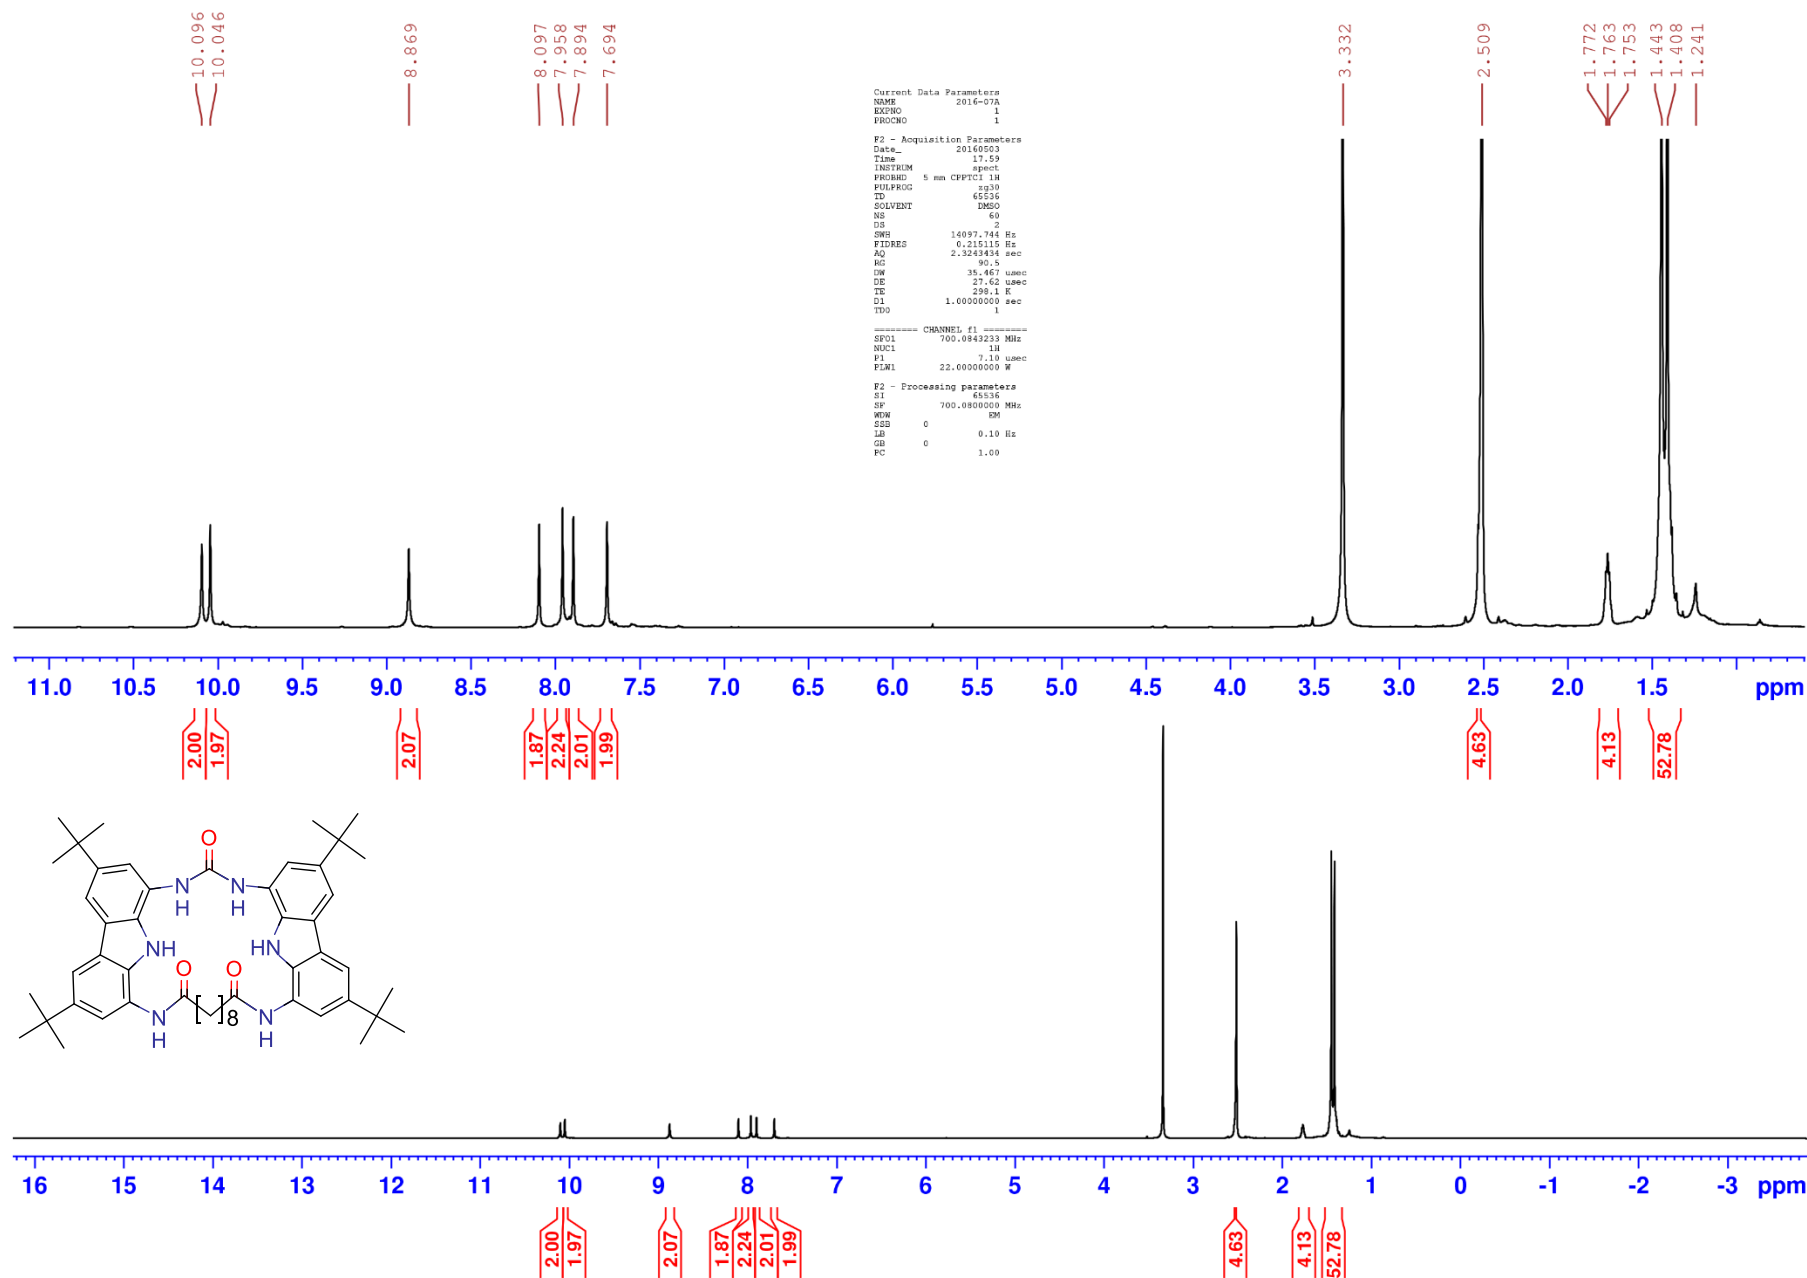

<sup>13</sup>C NMR spectrum (700.1 MHz) of compound **MC008**

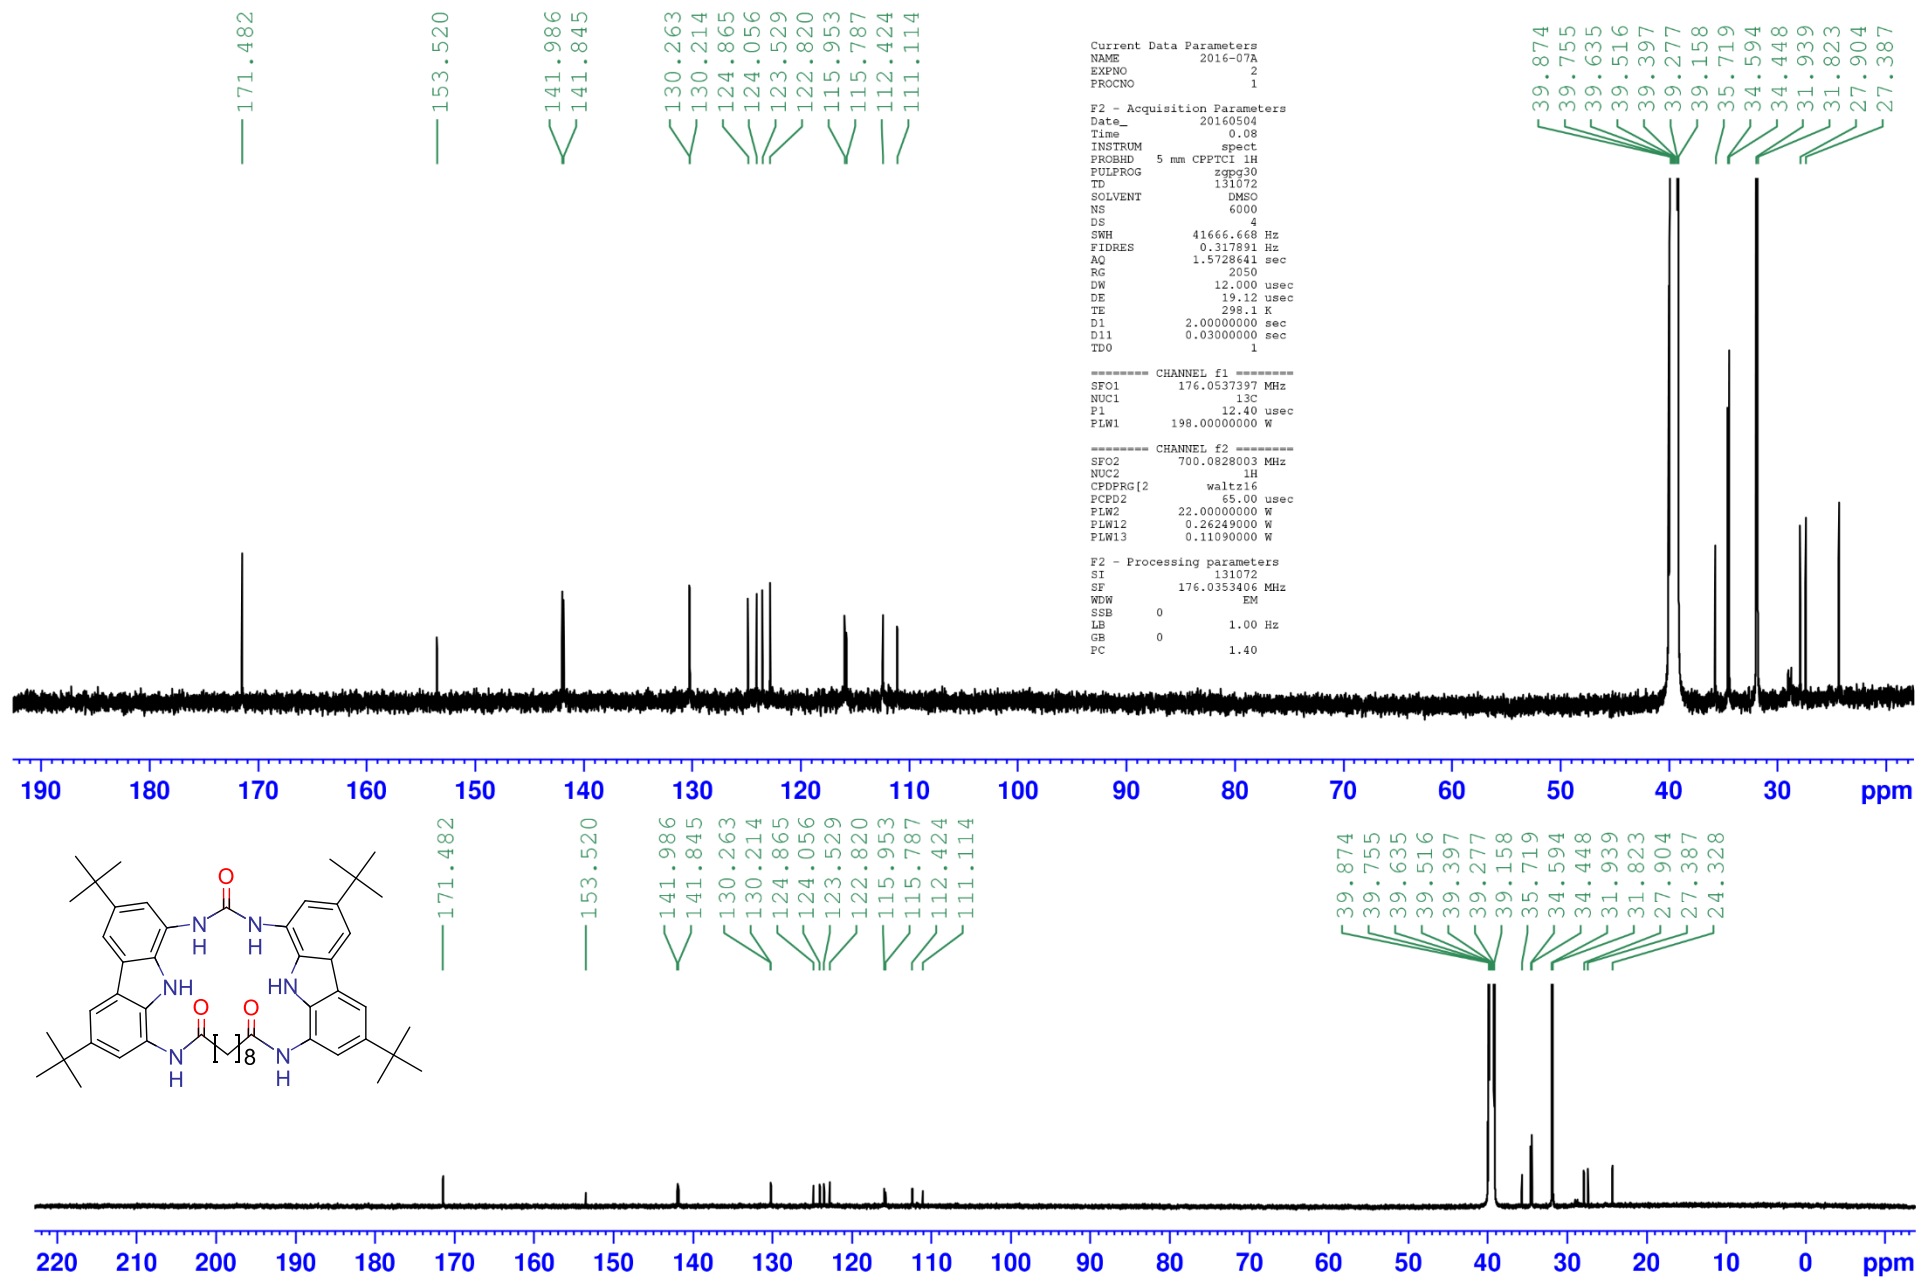



$^1\text{H}$ - $^{13}\text{C}$  HSQC spectrum (700.1 MHz) of compound **MC008**

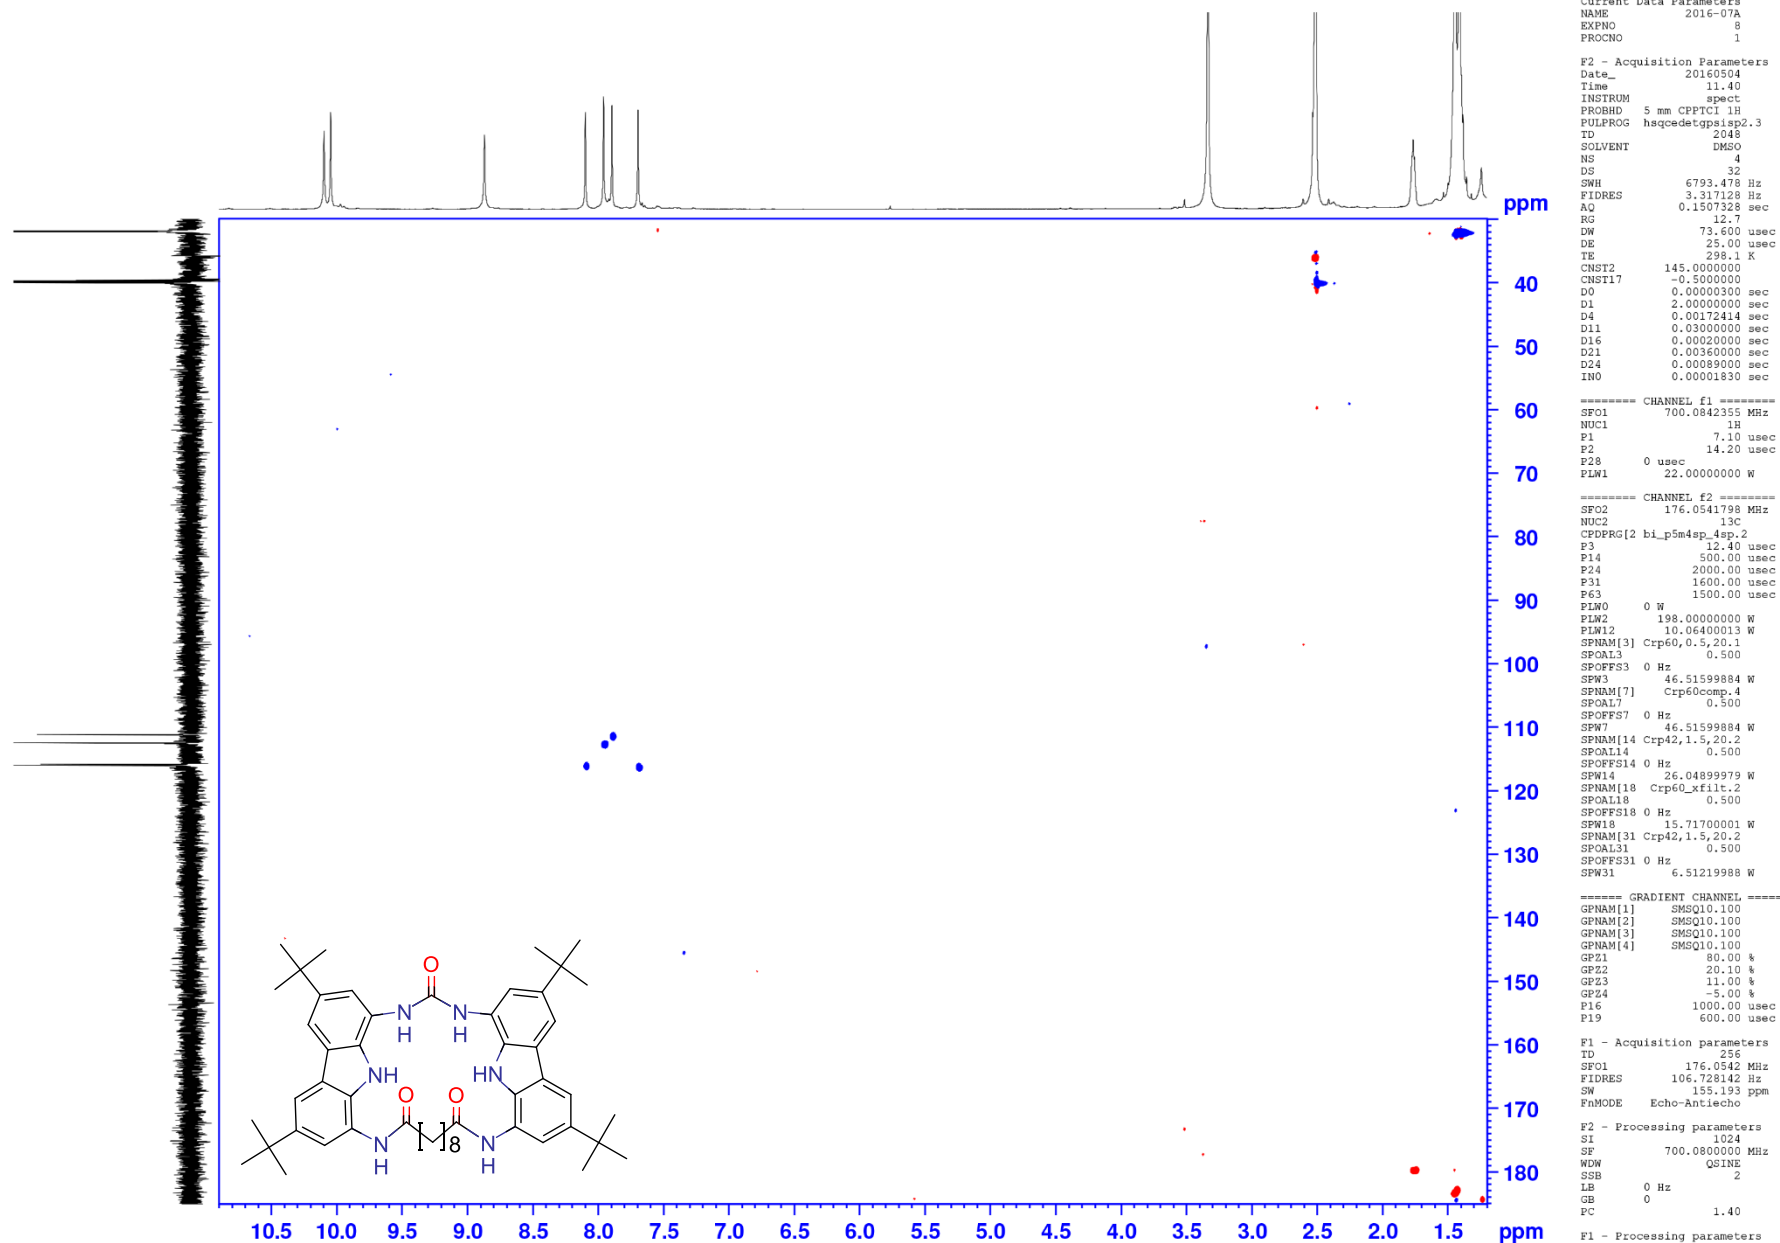

$^1\text{H}$ - $^{13}\text{C}$  HMBC spectrum (700.1 MHz) of compound **MC008**

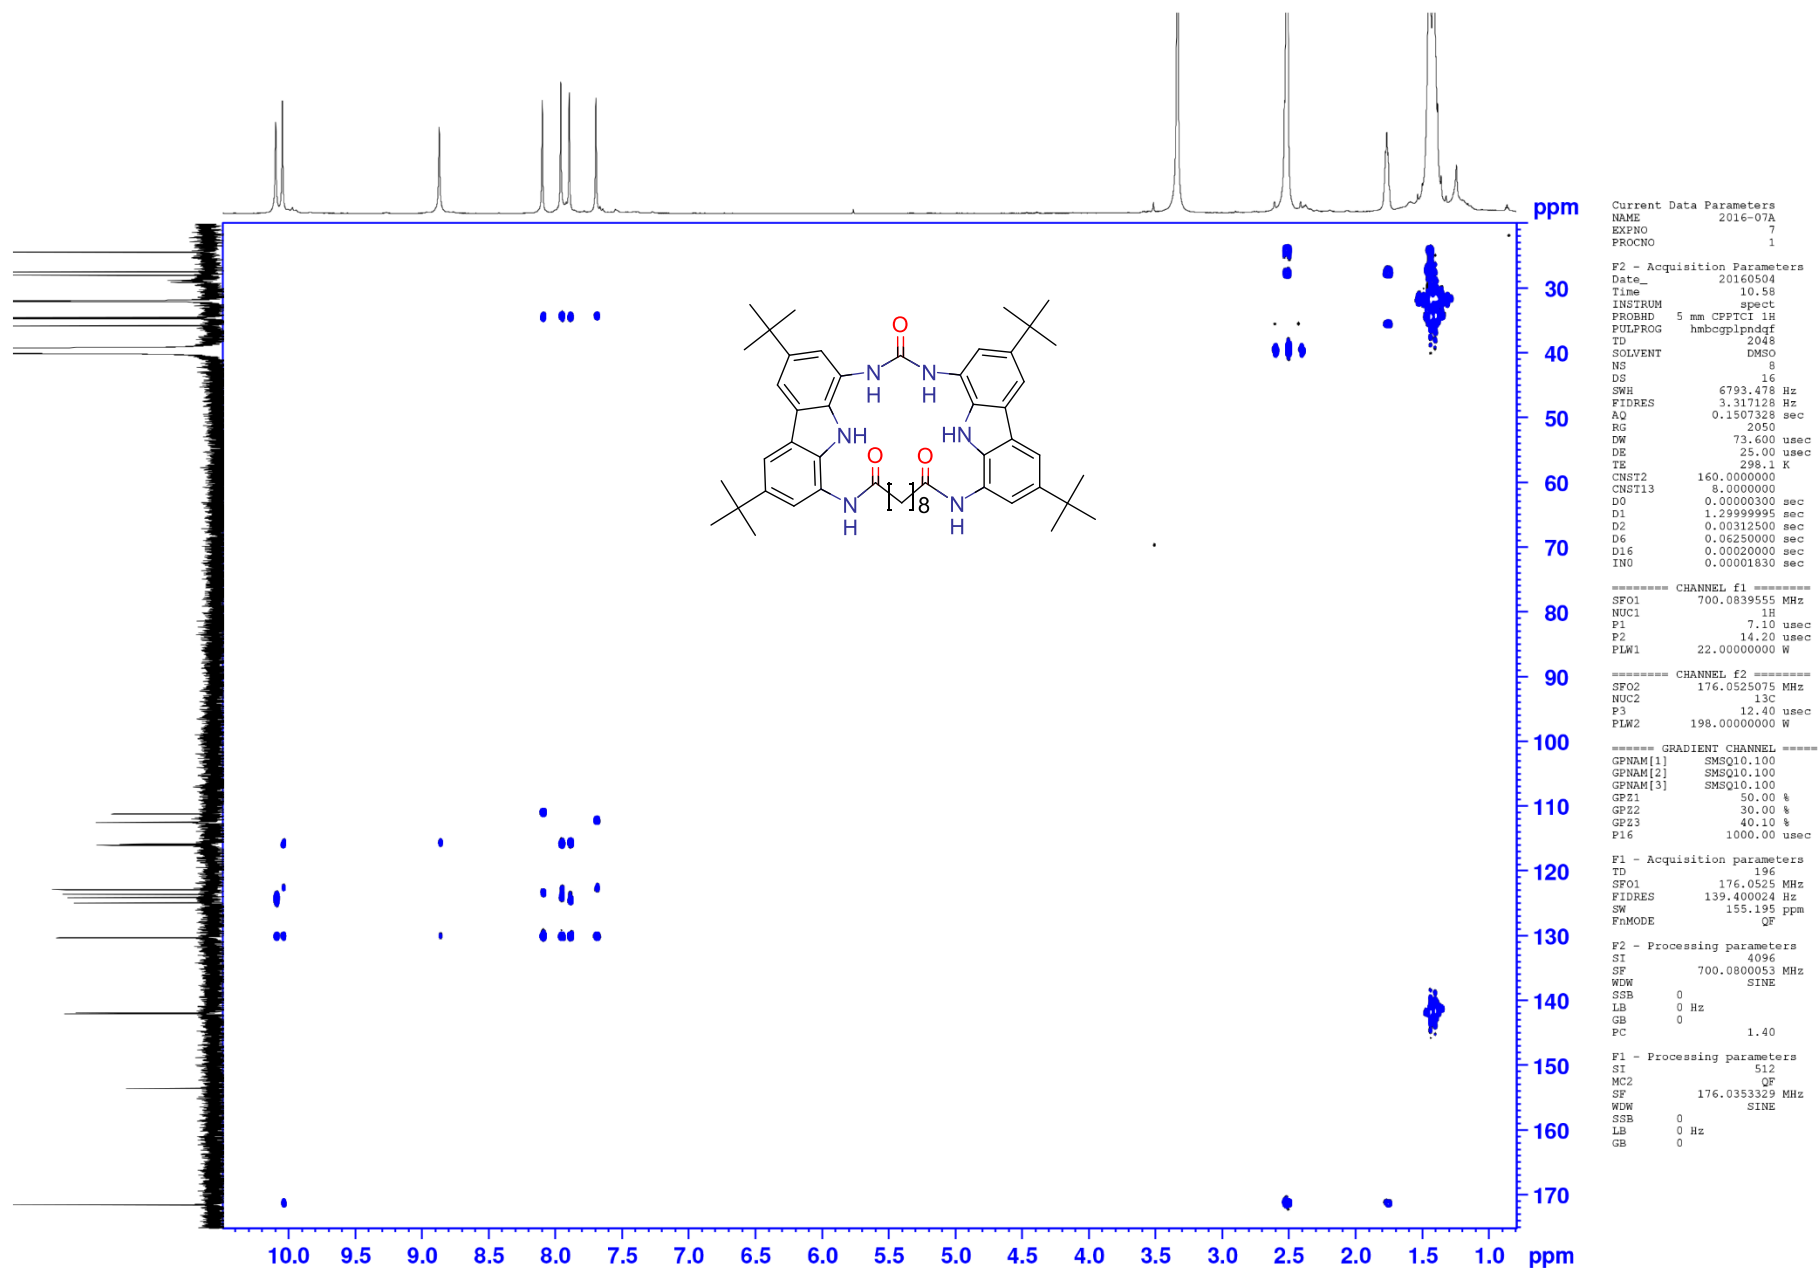

HRMS spectrum of compound **MC008**

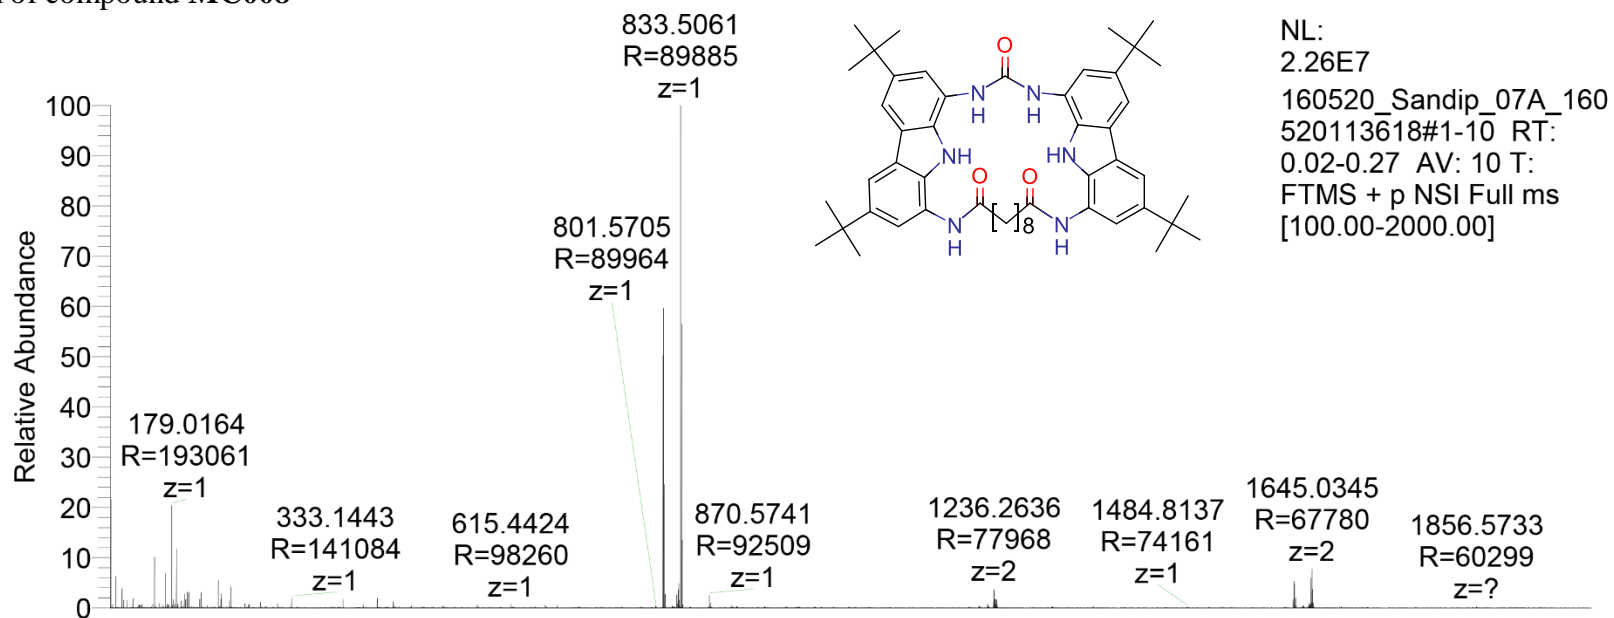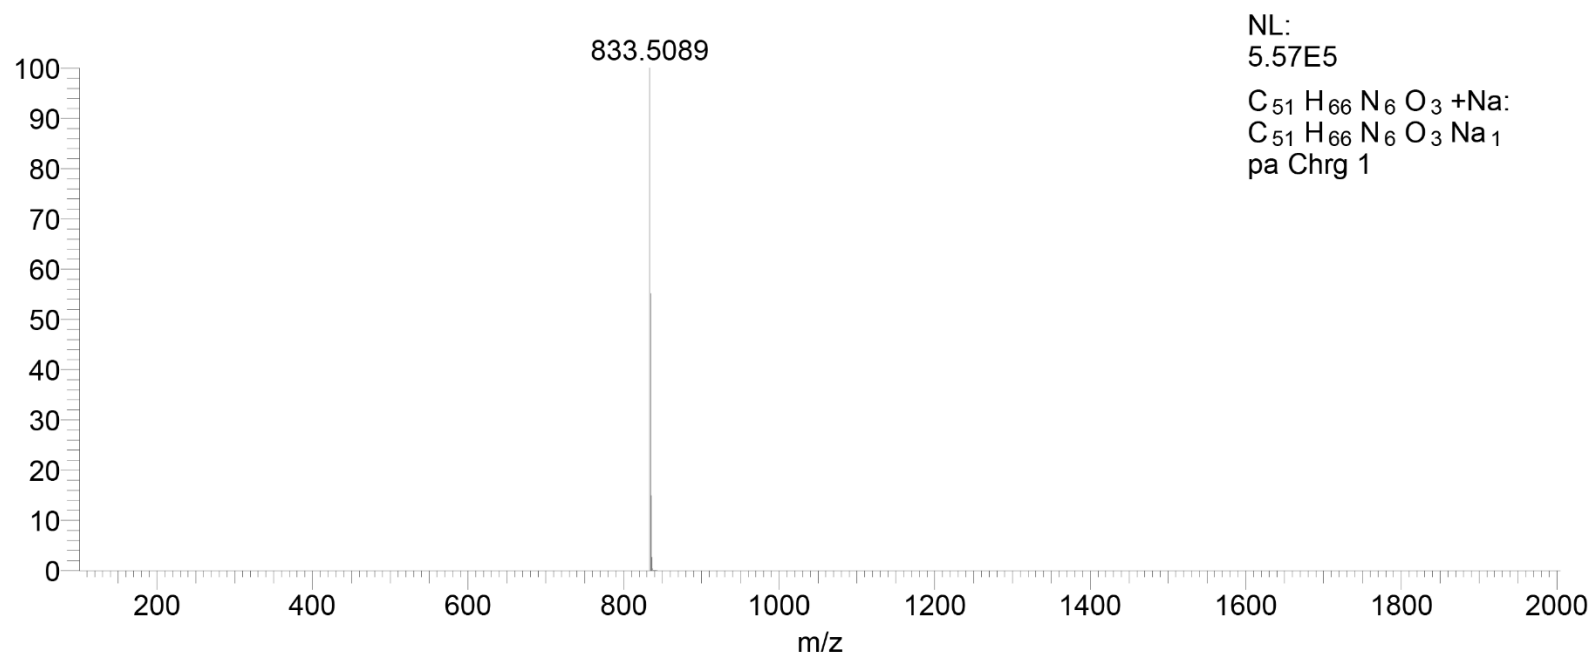

NL:  
2.26E7  
160520\_Sandip\_07A\_160  
520113618#1-10 RT:  
0.02-0.27 AV: 10 T:  
FTMS + p NSI Full ms  
[100.00-2000.00]

NL:  
5.57E5  
C<sub>51</sub> H<sub>66</sub> N<sub>6</sub> O<sub>3</sub> +Na:  
C<sub>51</sub> H<sub>66</sub> N<sub>6</sub> O<sub>3</sub> Na<sub>1</sub>  
pa Chrg 1

<sup>1</sup>H NMR spectrum (700.1 MHz) of compound **MC009**

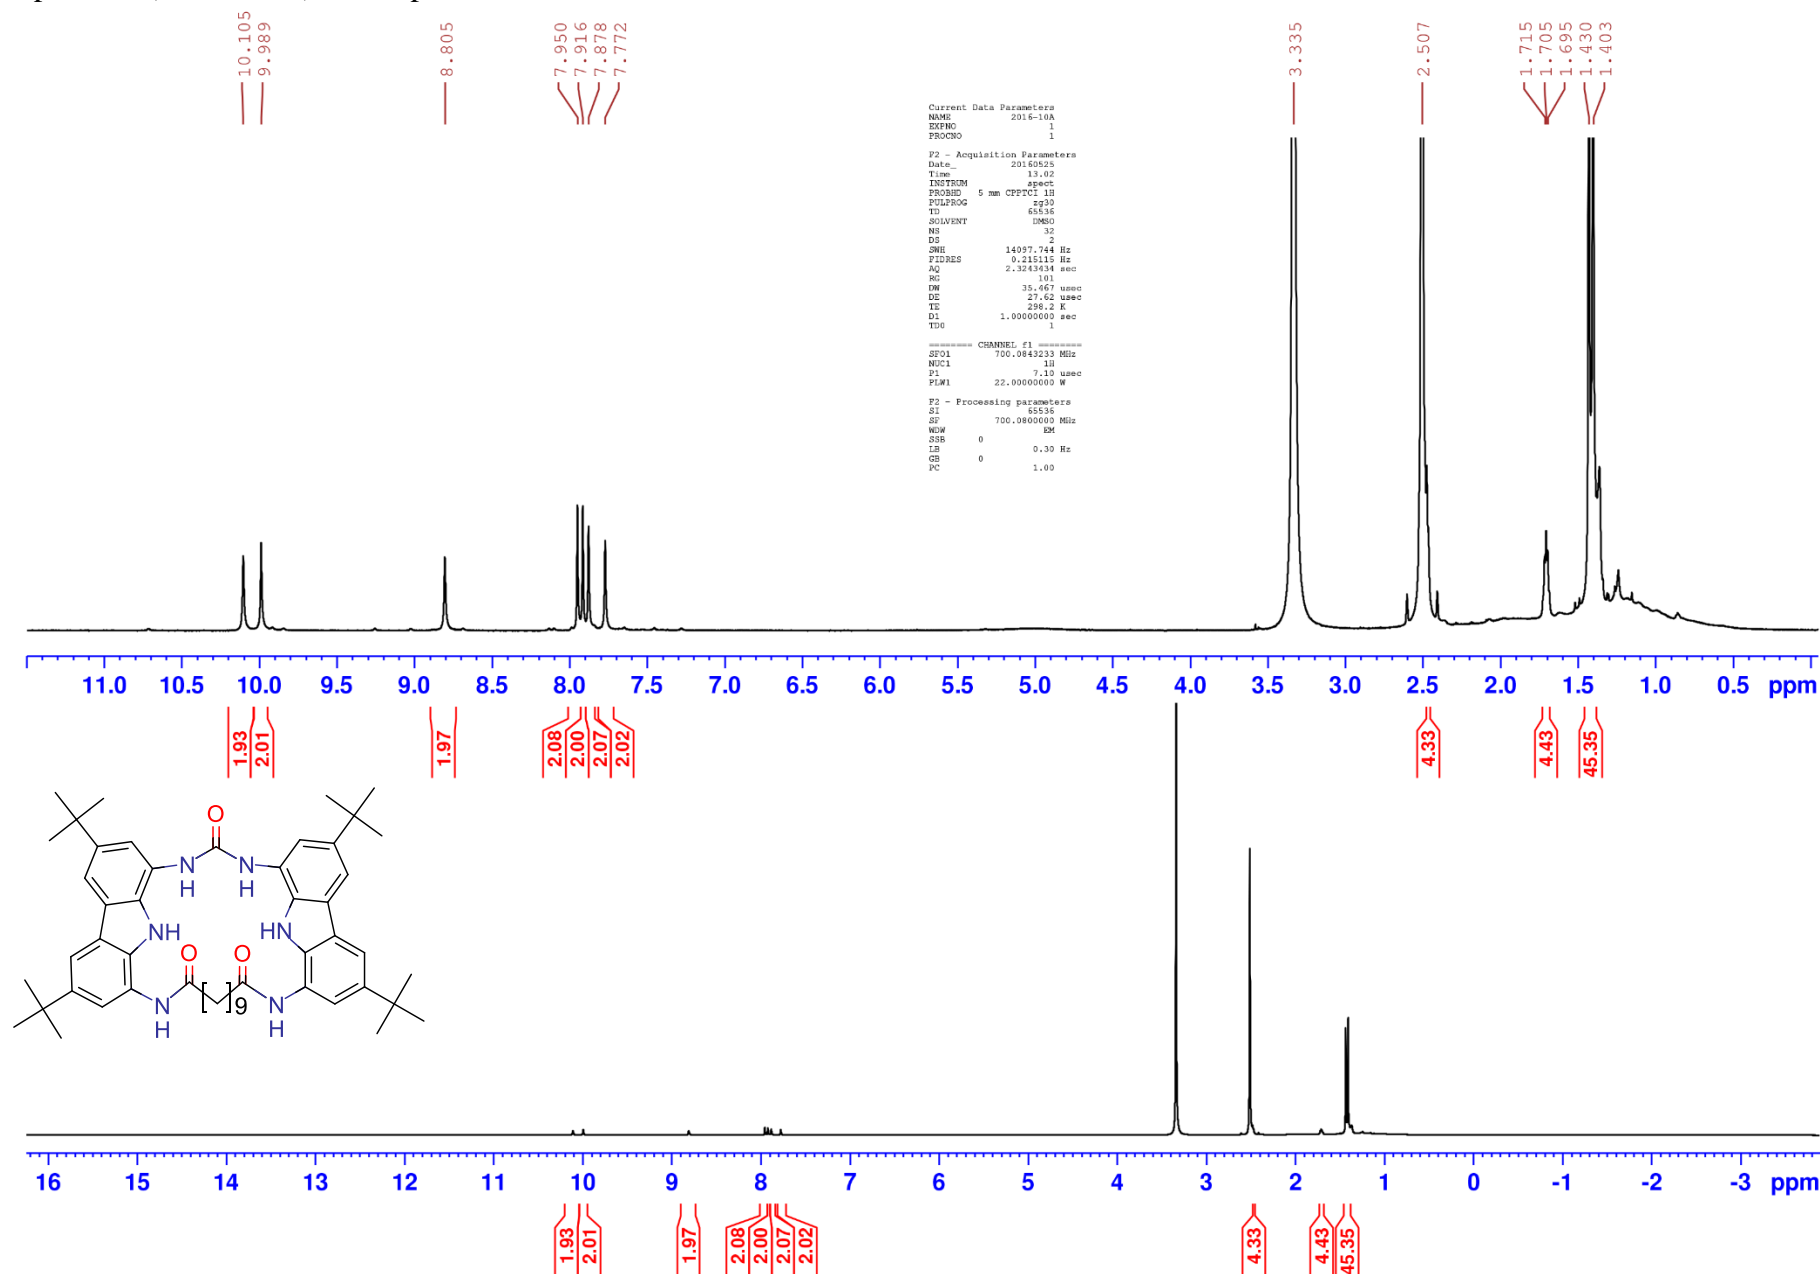

<sup>13</sup>C NMR spectrum (700.1 MHz) of compound **MC009**

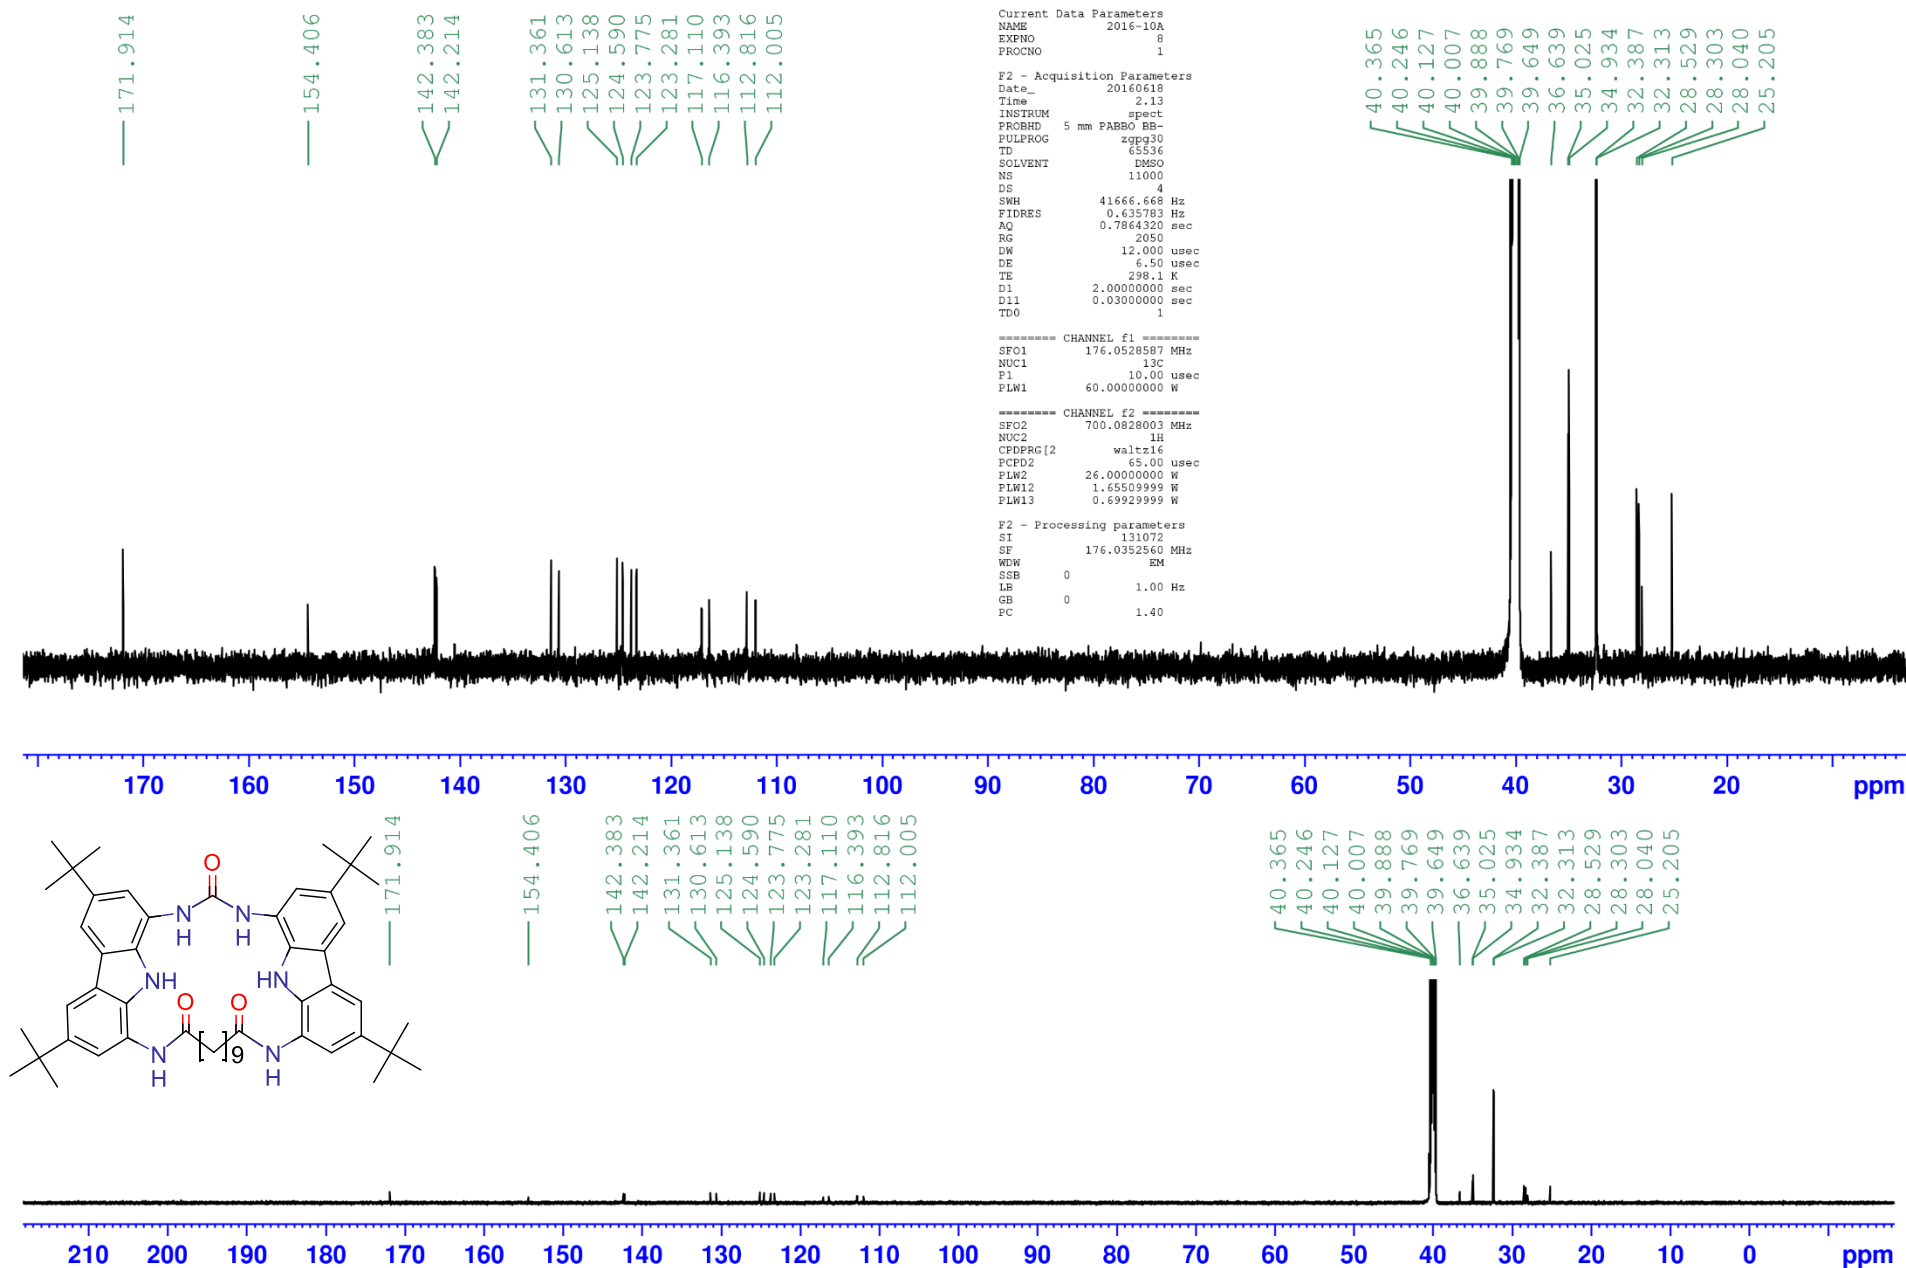

$^1\text{H}$ - $^{13}\text{C}$  HSQC spectrum (700.1 MHz) of compound **MC009**

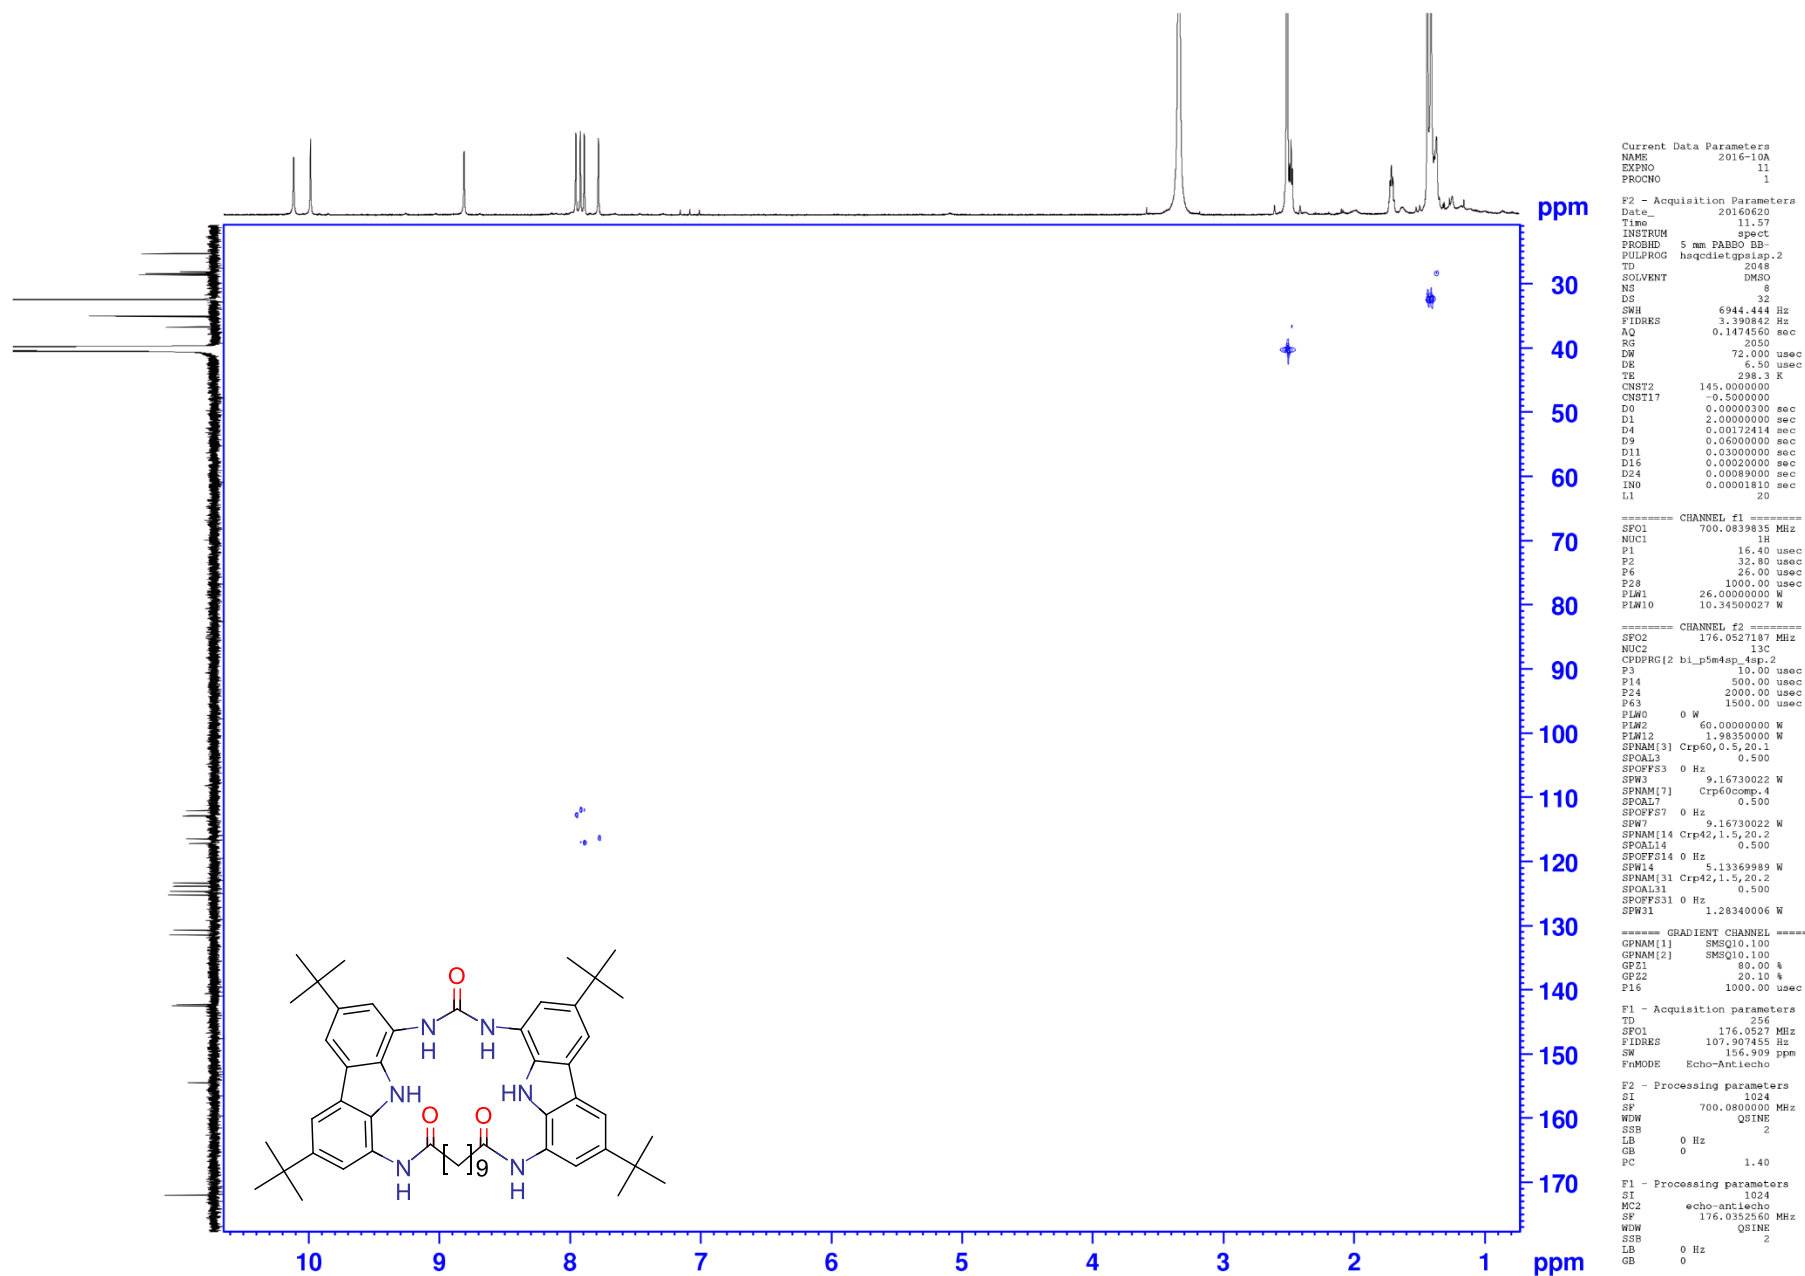

$^1\text{H}$ - $^{13}\text{C}$  HMBC spectrum (700.1 MHz) of compound **MC009**

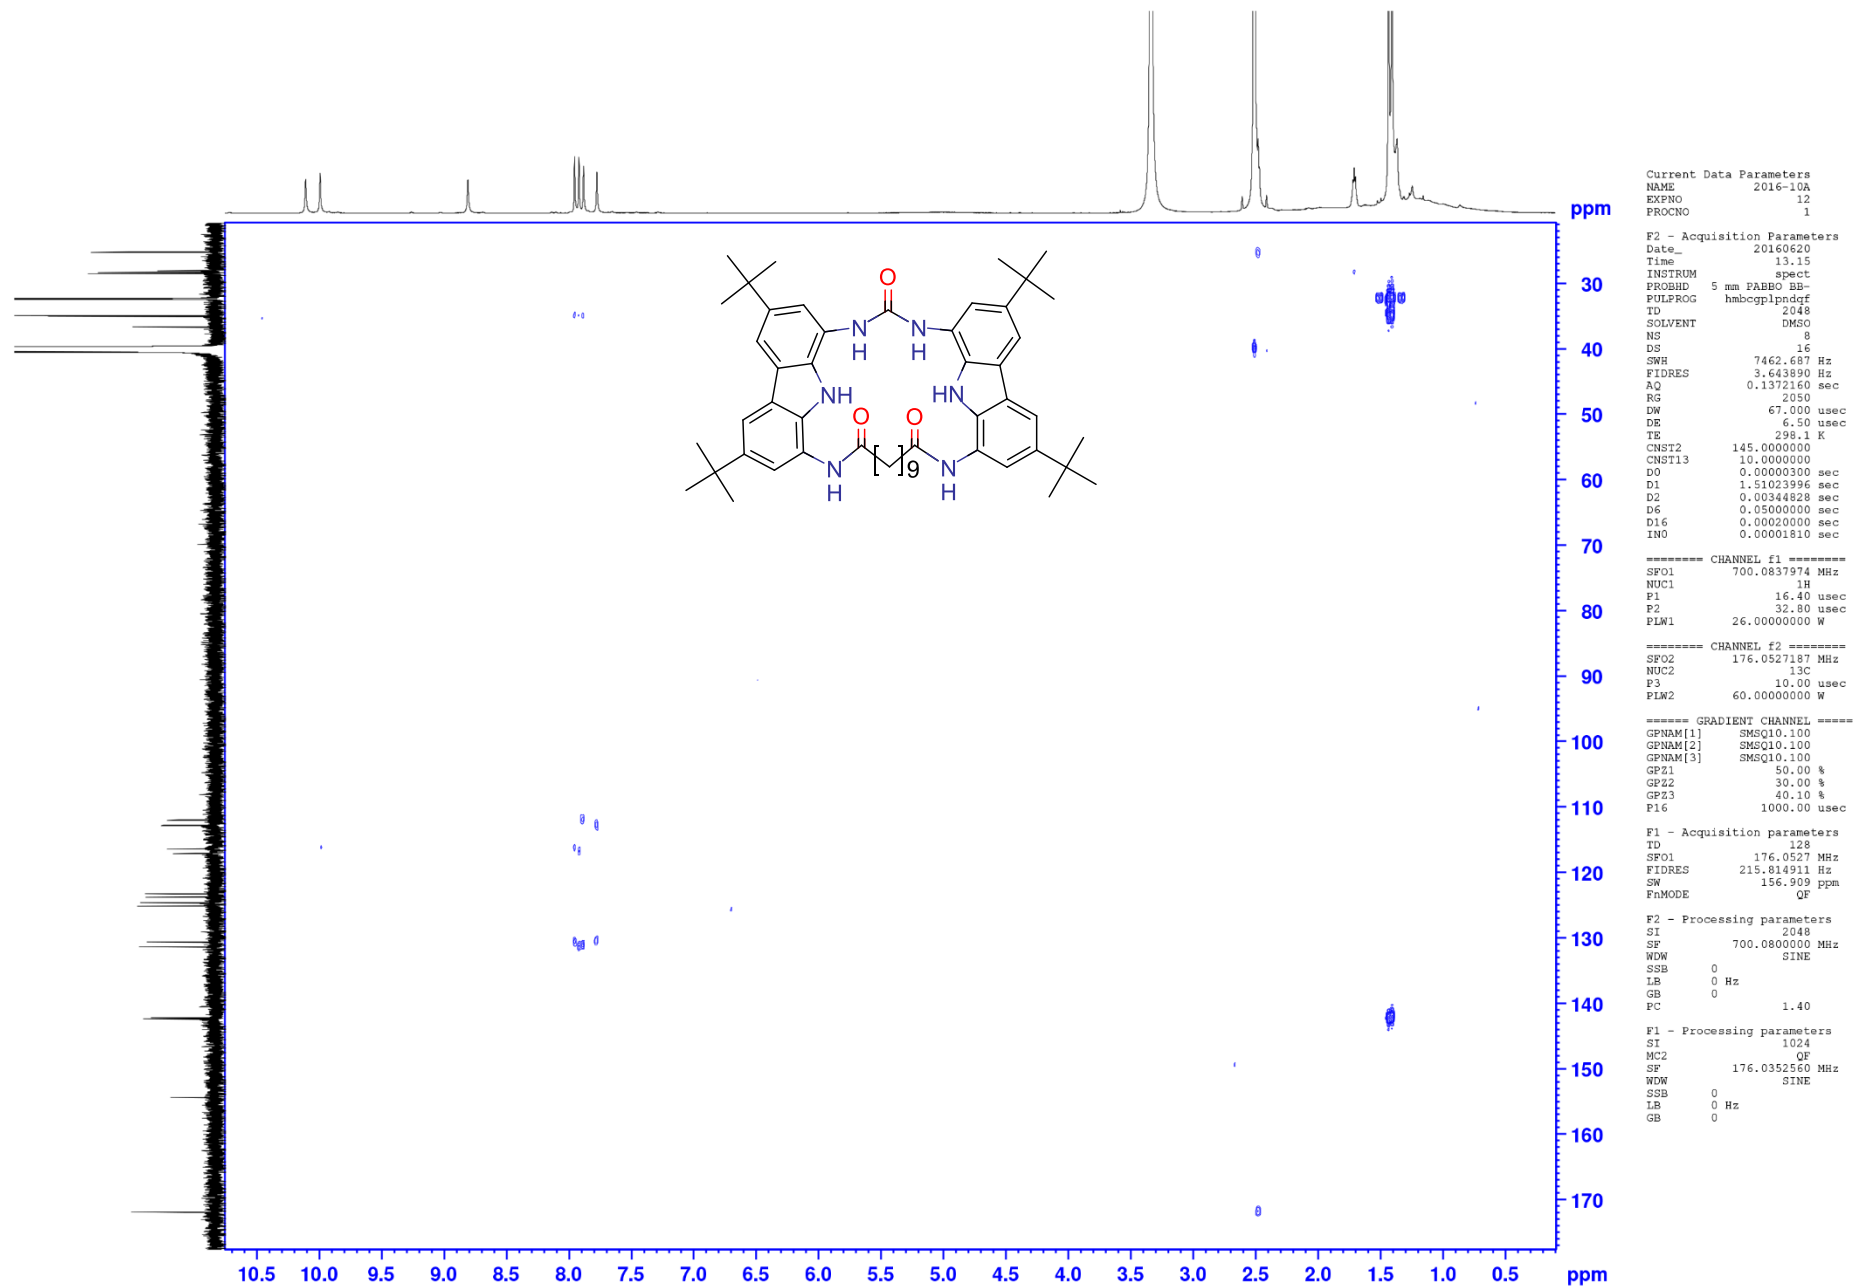

HRMS spectrum of compound **MC009**

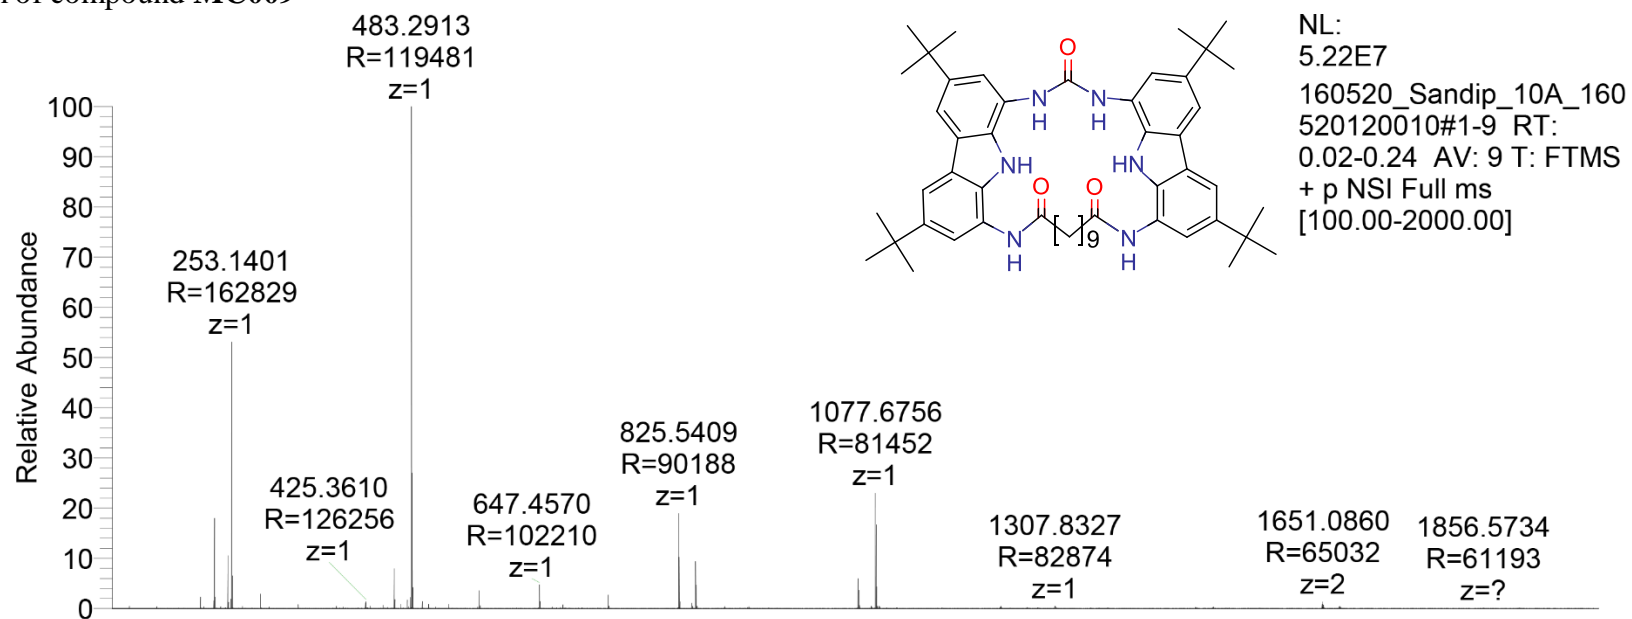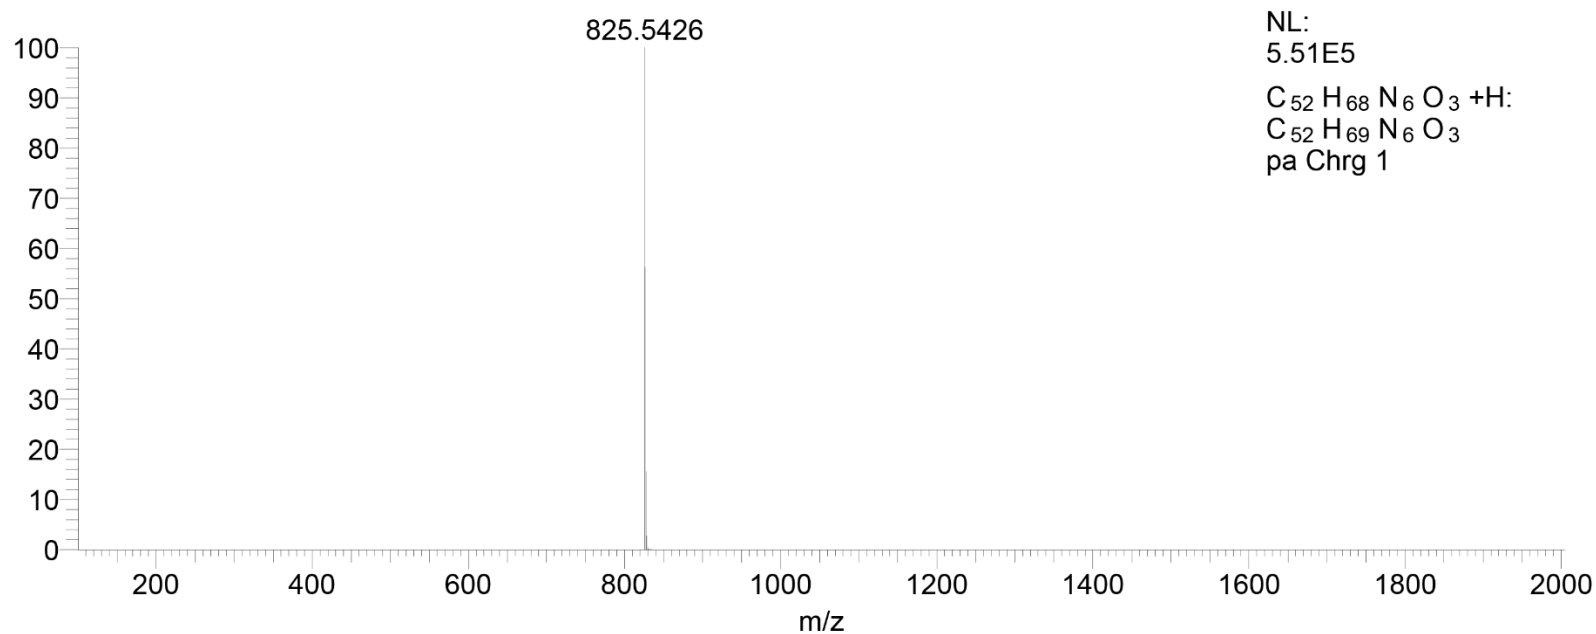



<sup>1</sup>H NMR spectrum (700.1 MHz) of compound **MC010**

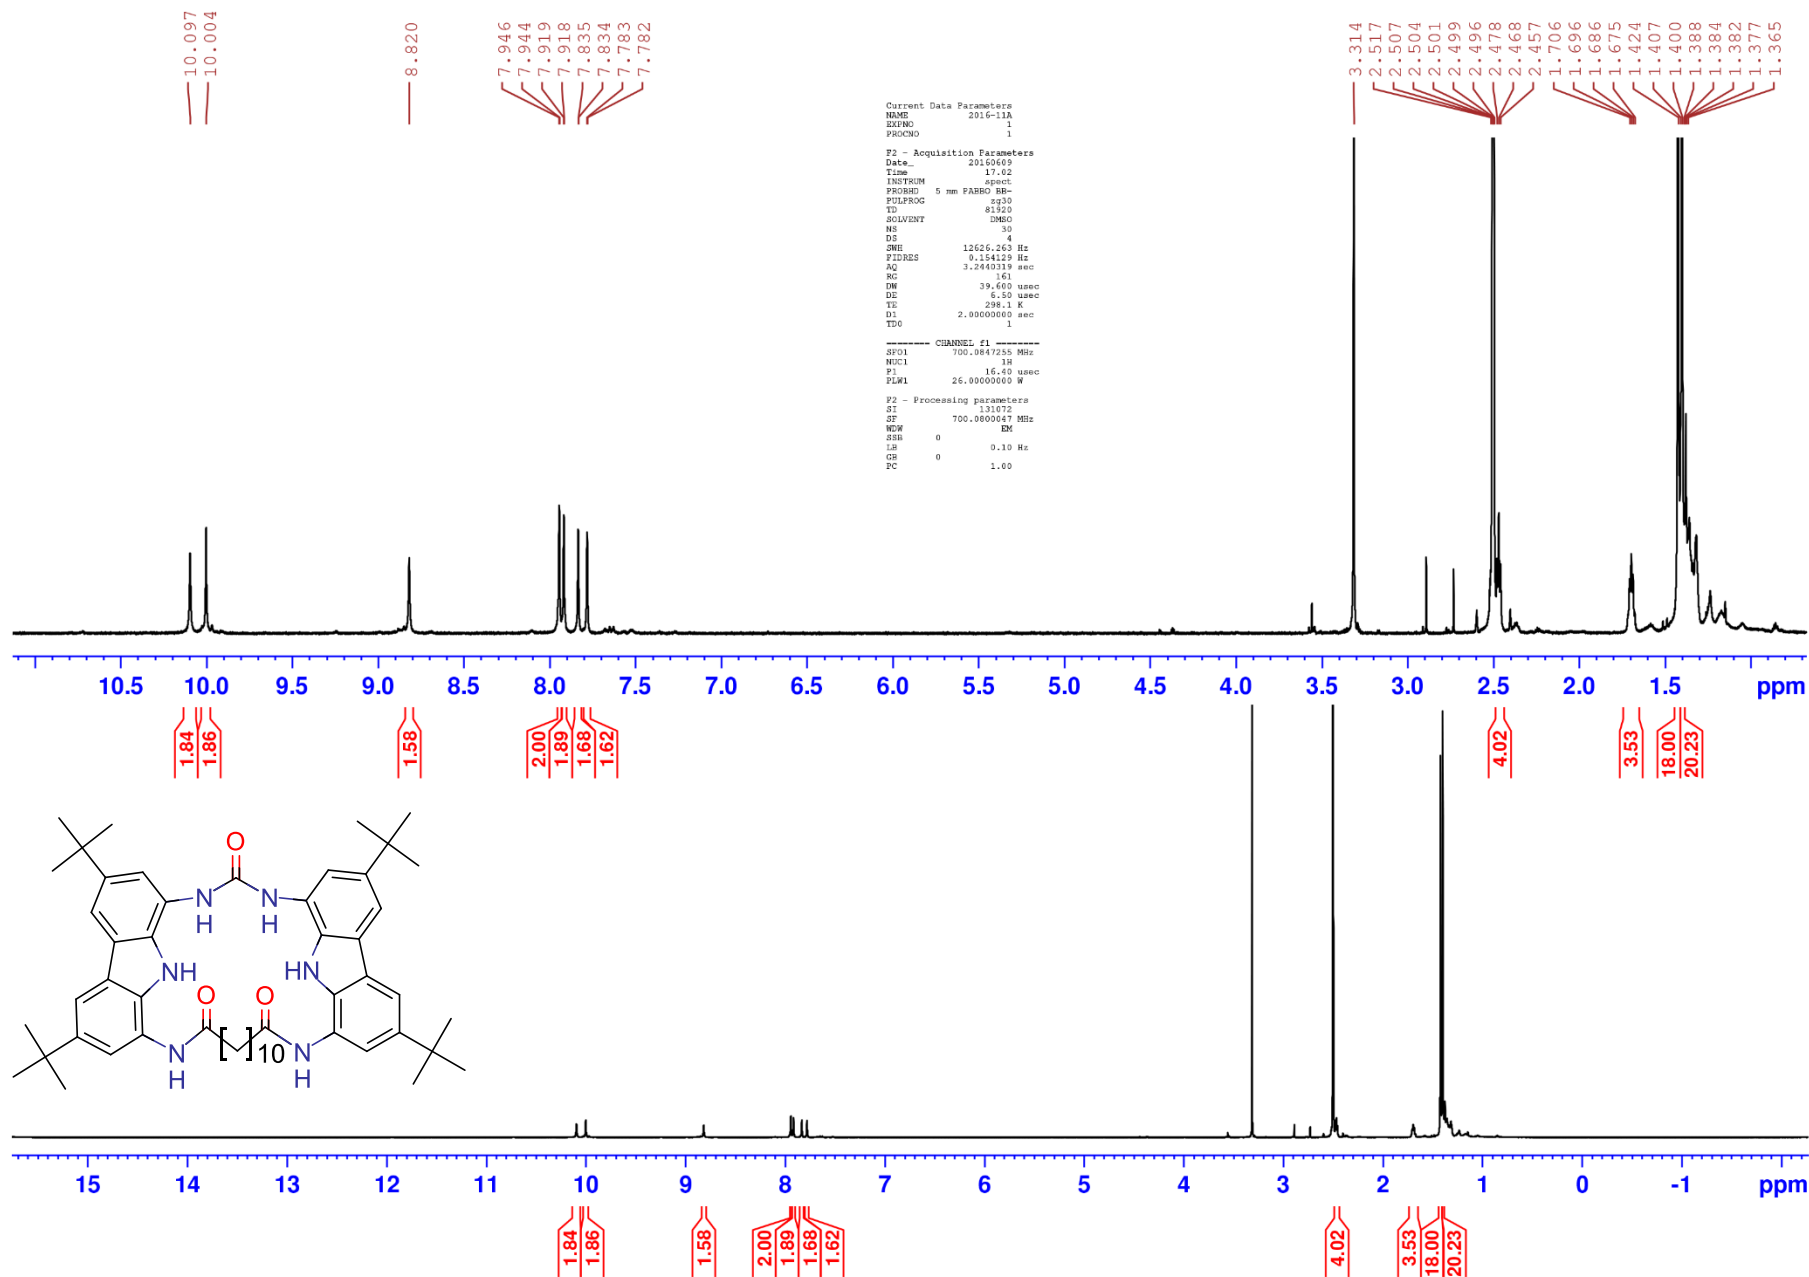

<sup>13</sup>C NMR spectrum (700.1 MHz) of compound **MC010**

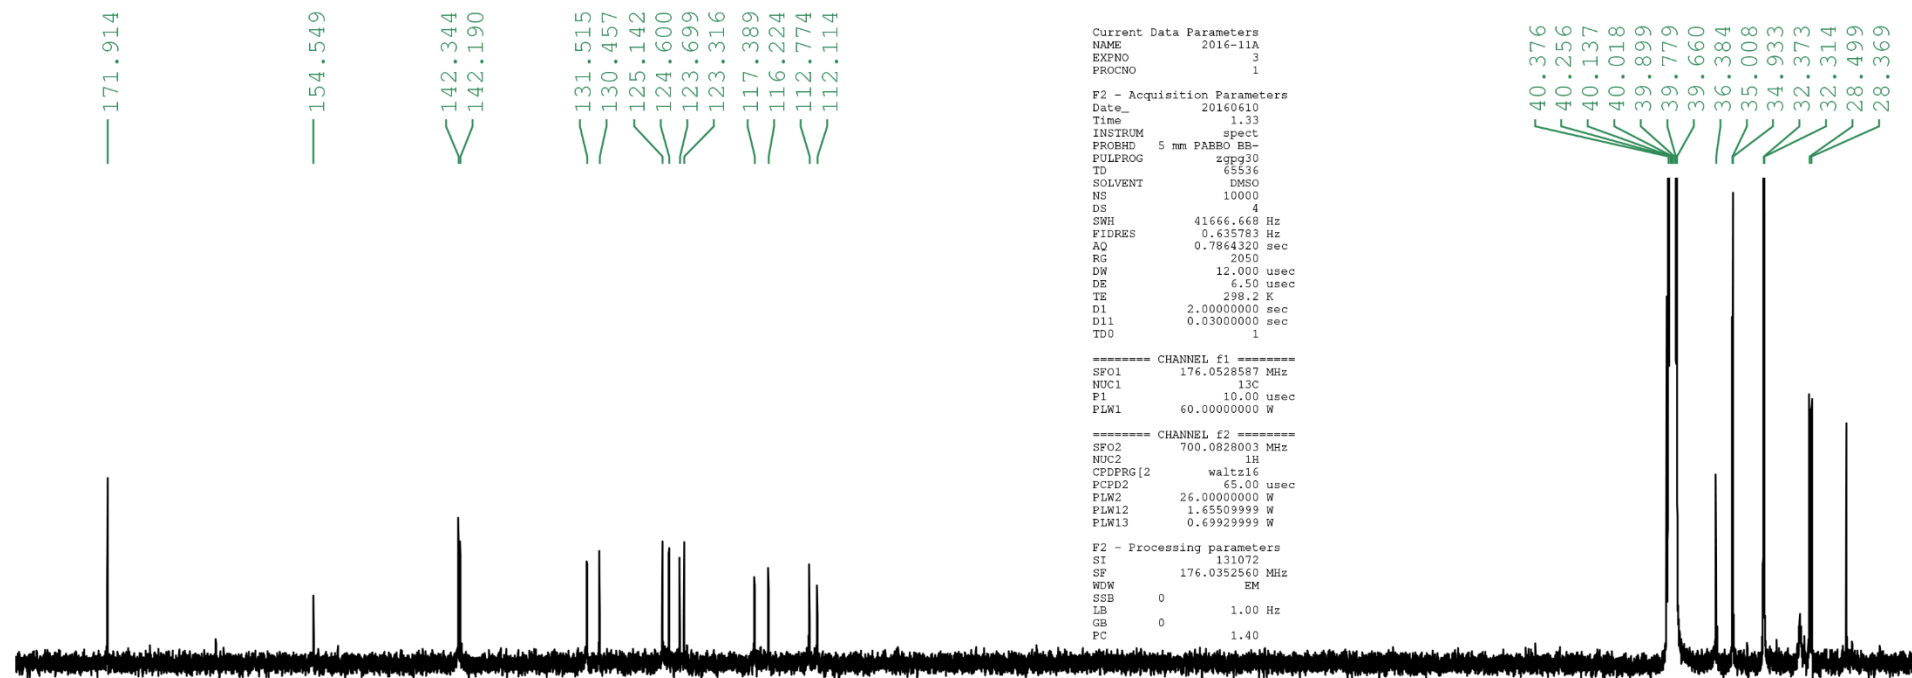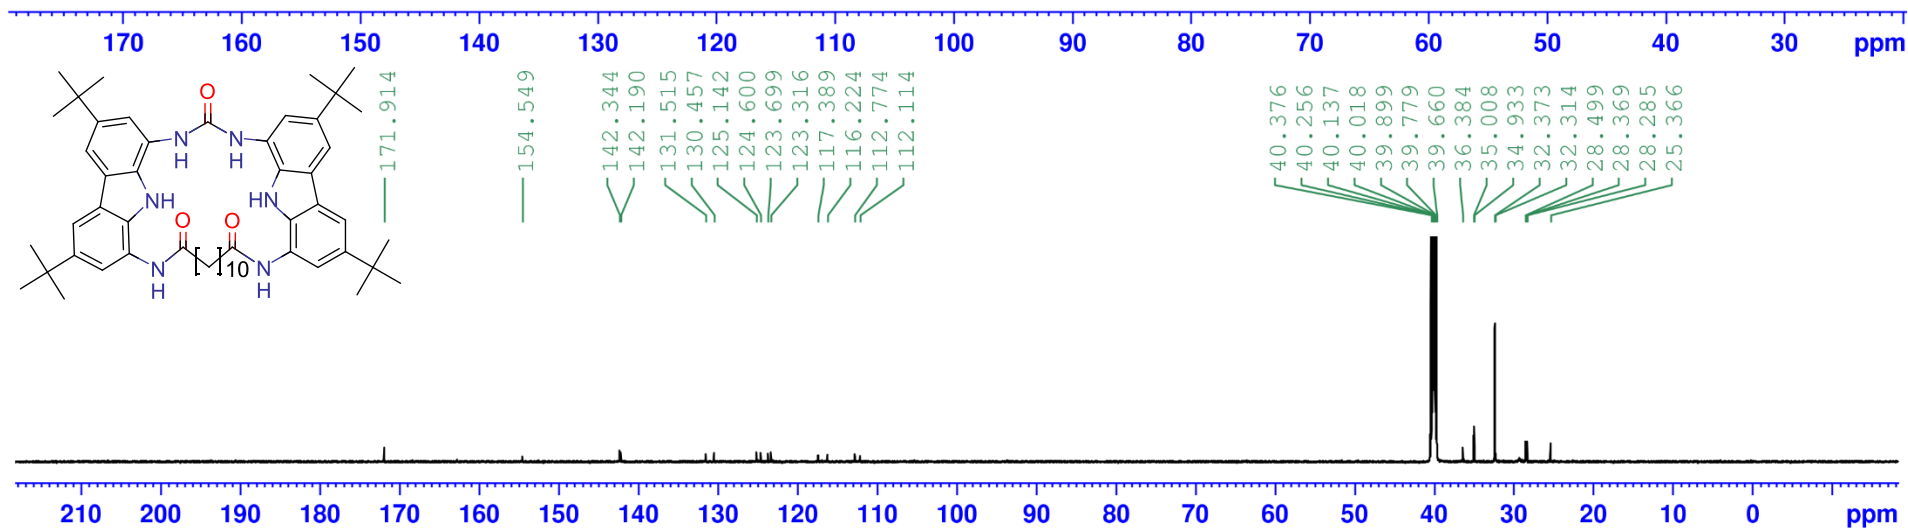

$^1\text{H}$ - $^{13}\text{C}$  HSQC spectrum (700.1 MHz) of compound **MC010**

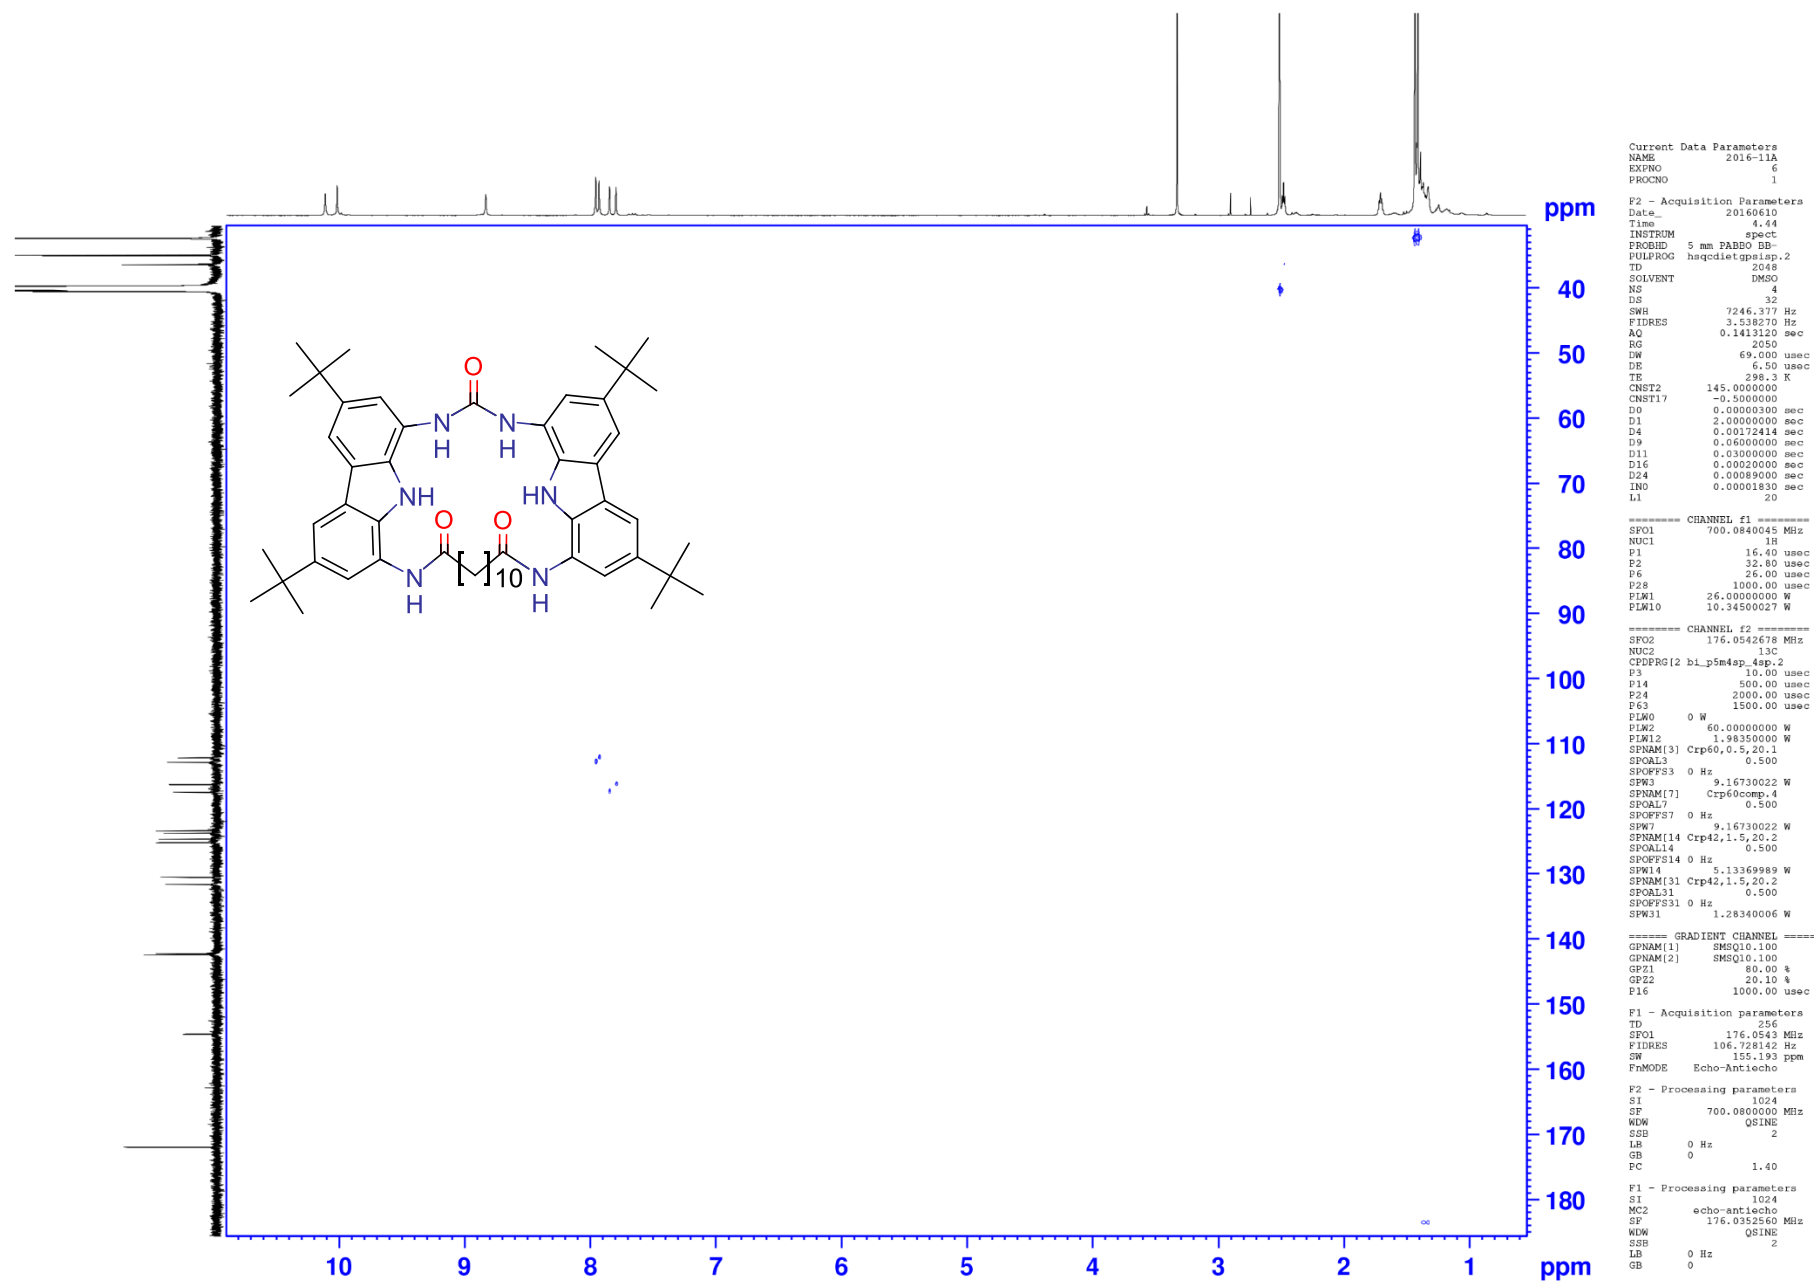

$^1\text{H}$ - $^{13}\text{C}$  HMBC spectrum (700.1 MHz) of compound **MC010**

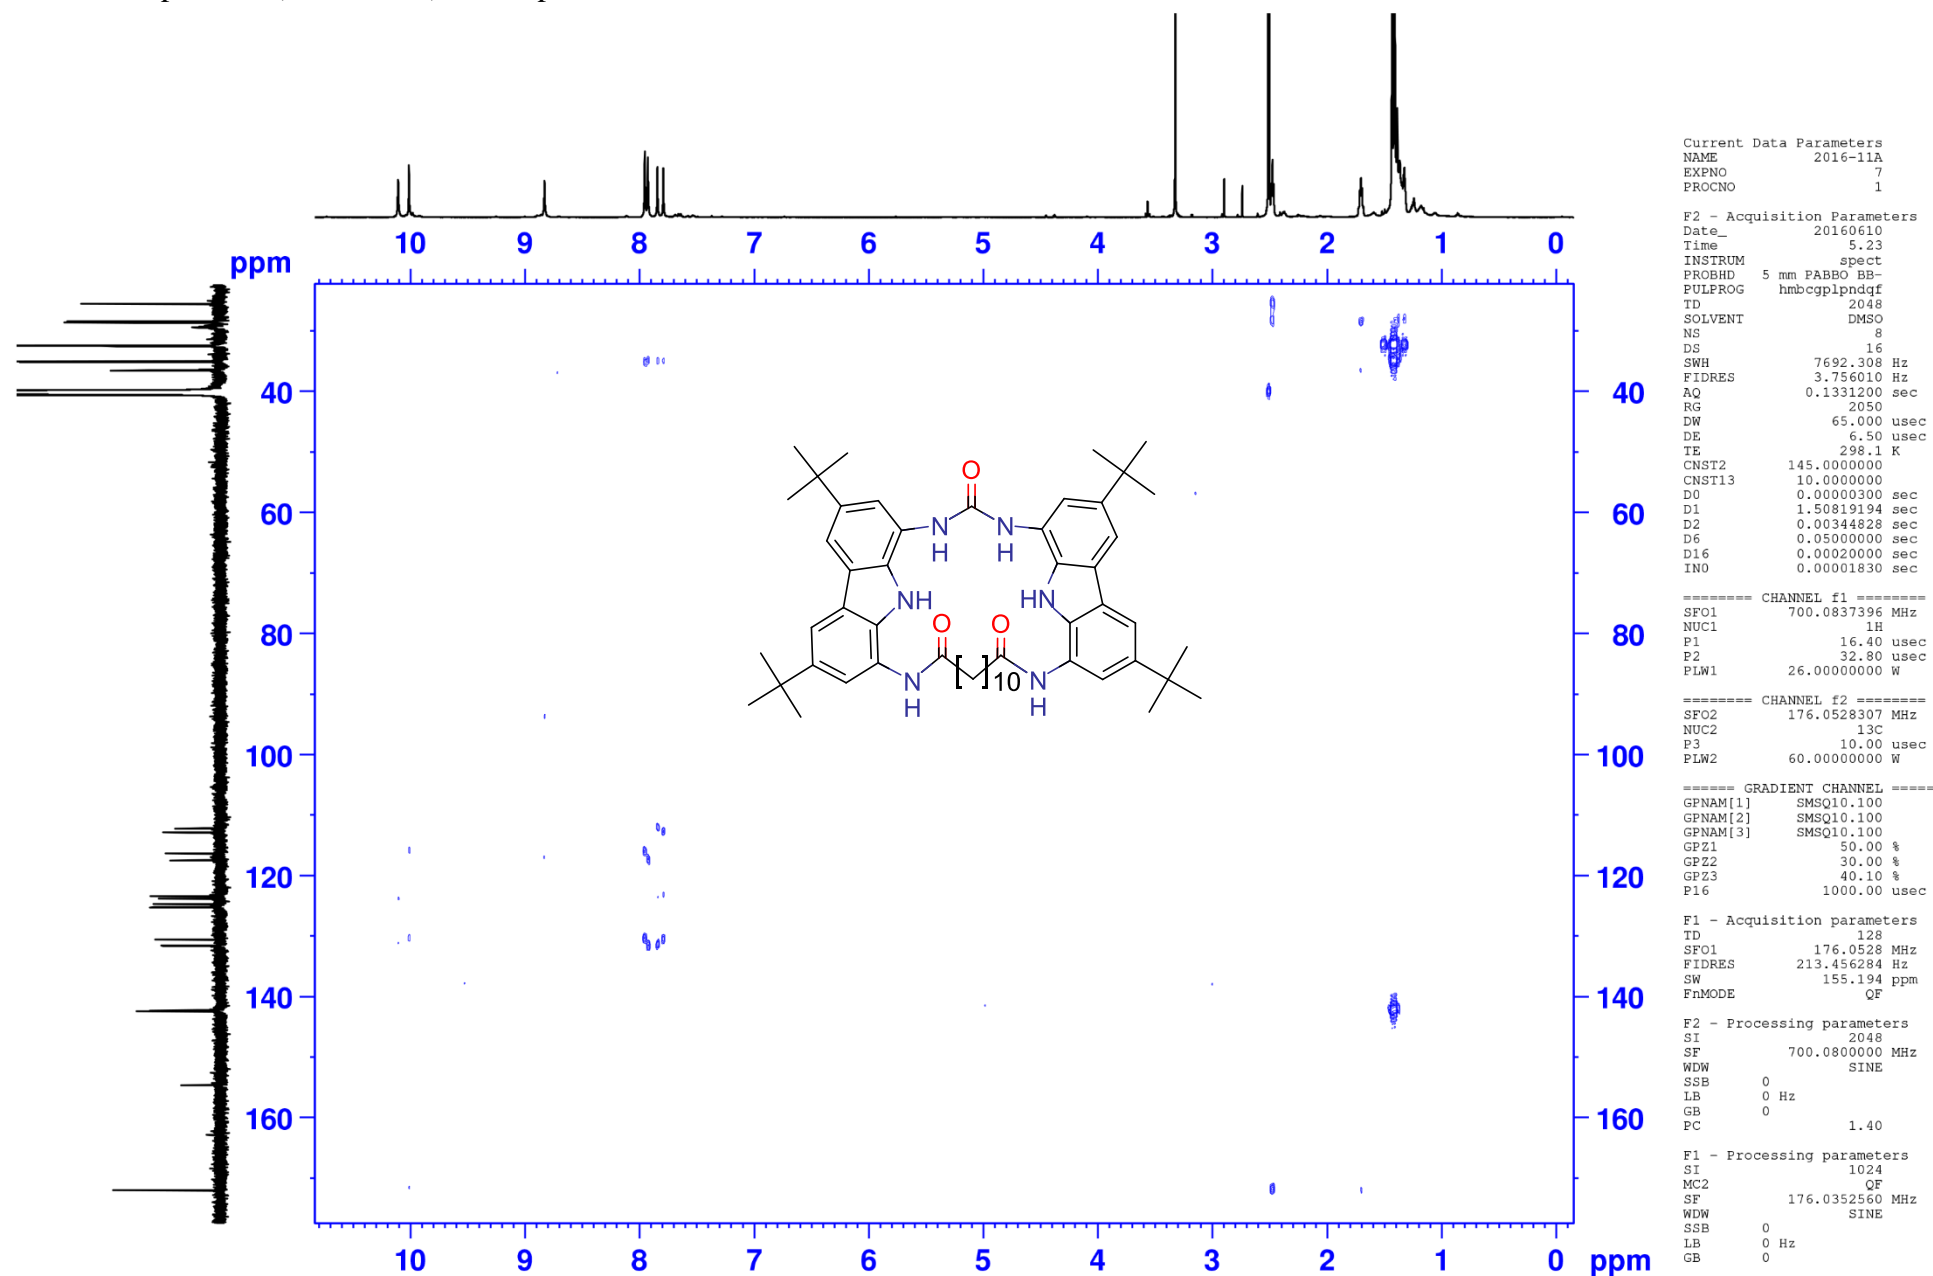

HRMS spectrum of compound **MC010**

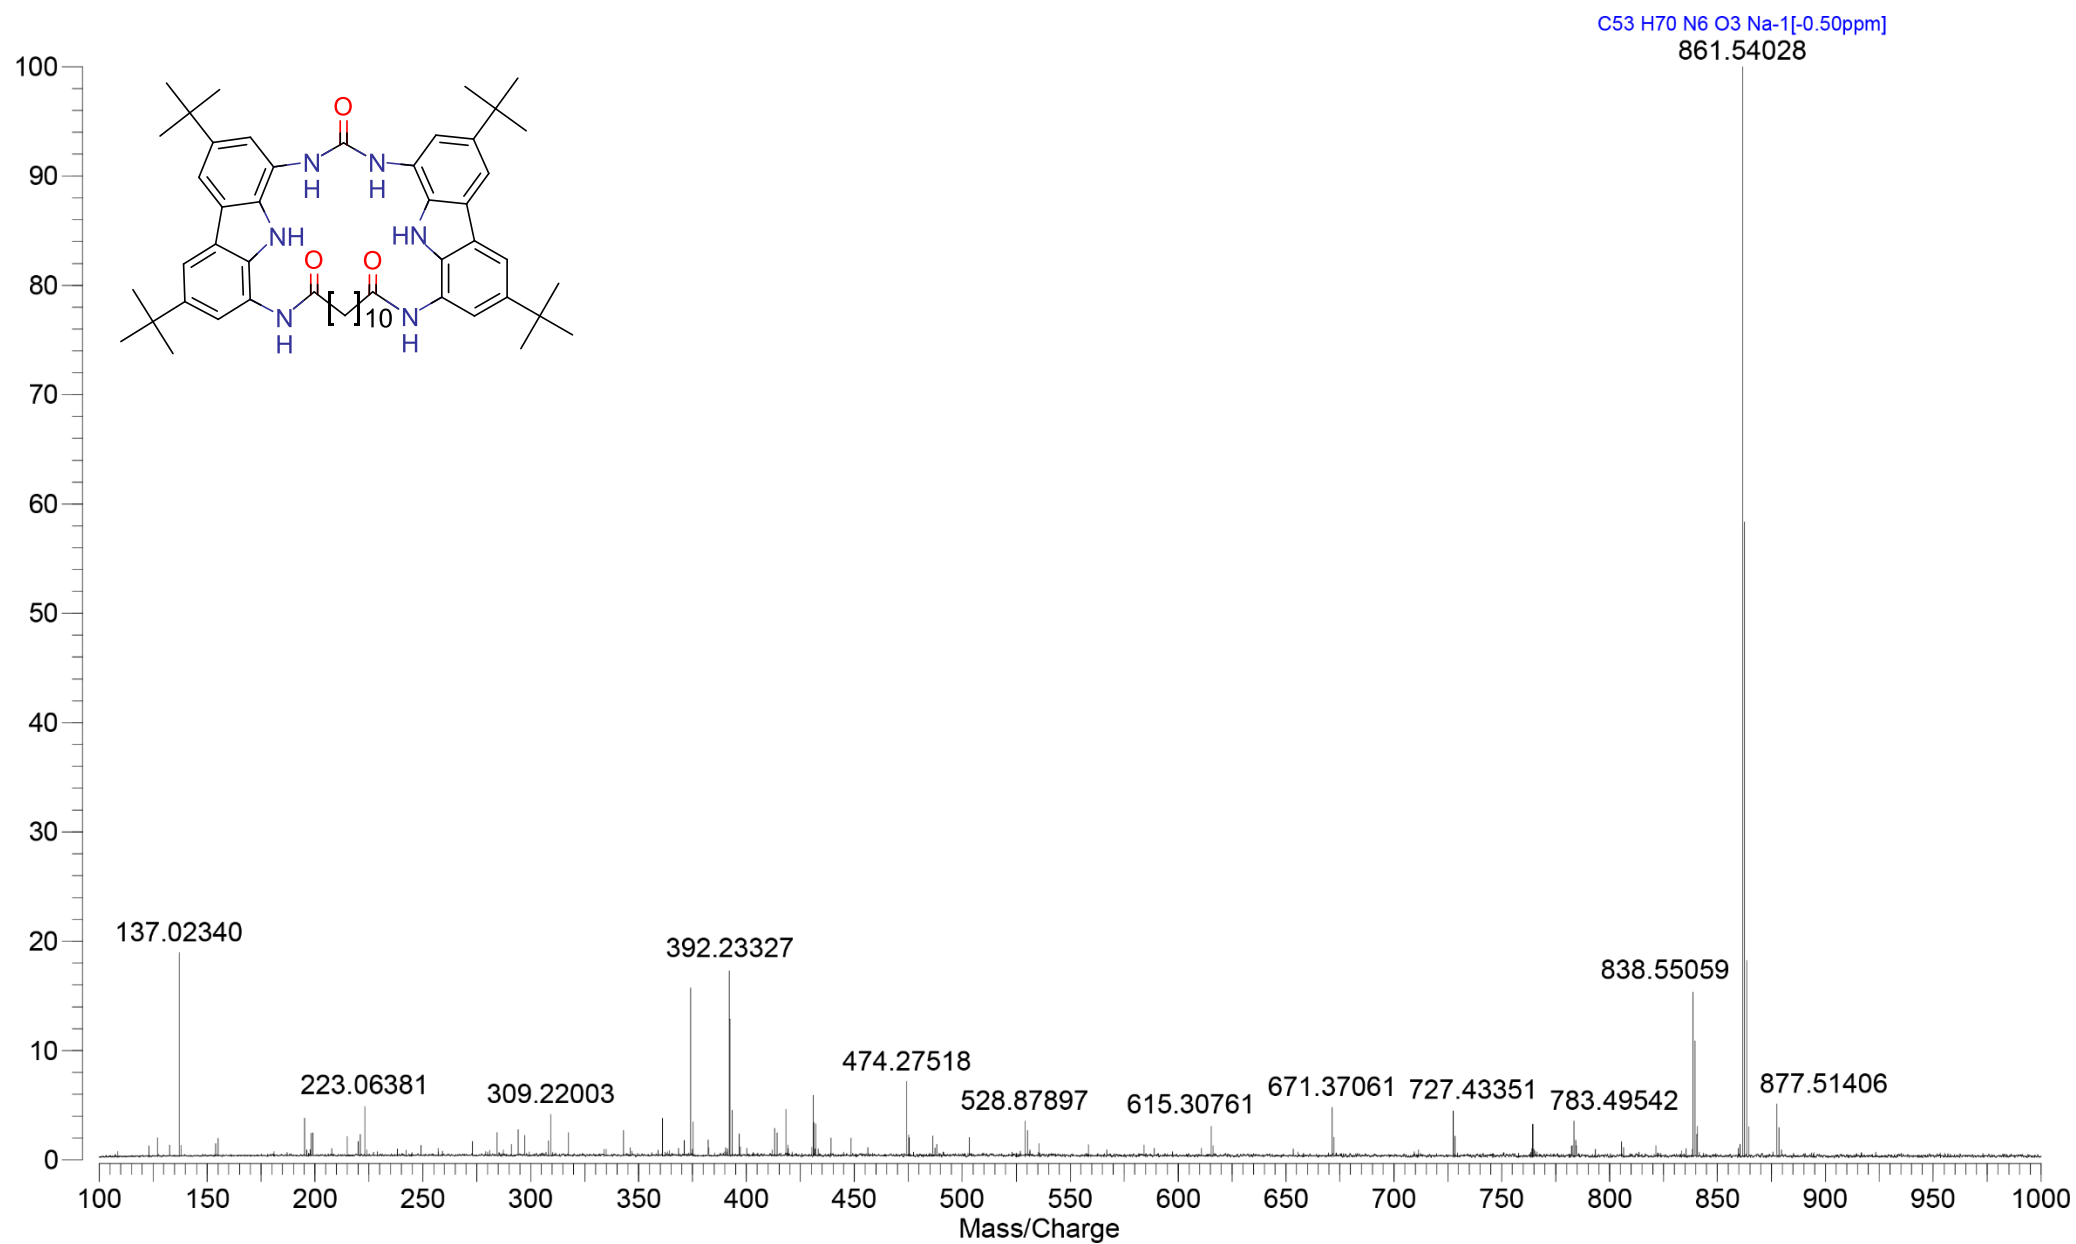

# <sup>1</sup>H NMR spectrum (700.1 MHz) of compound MC011

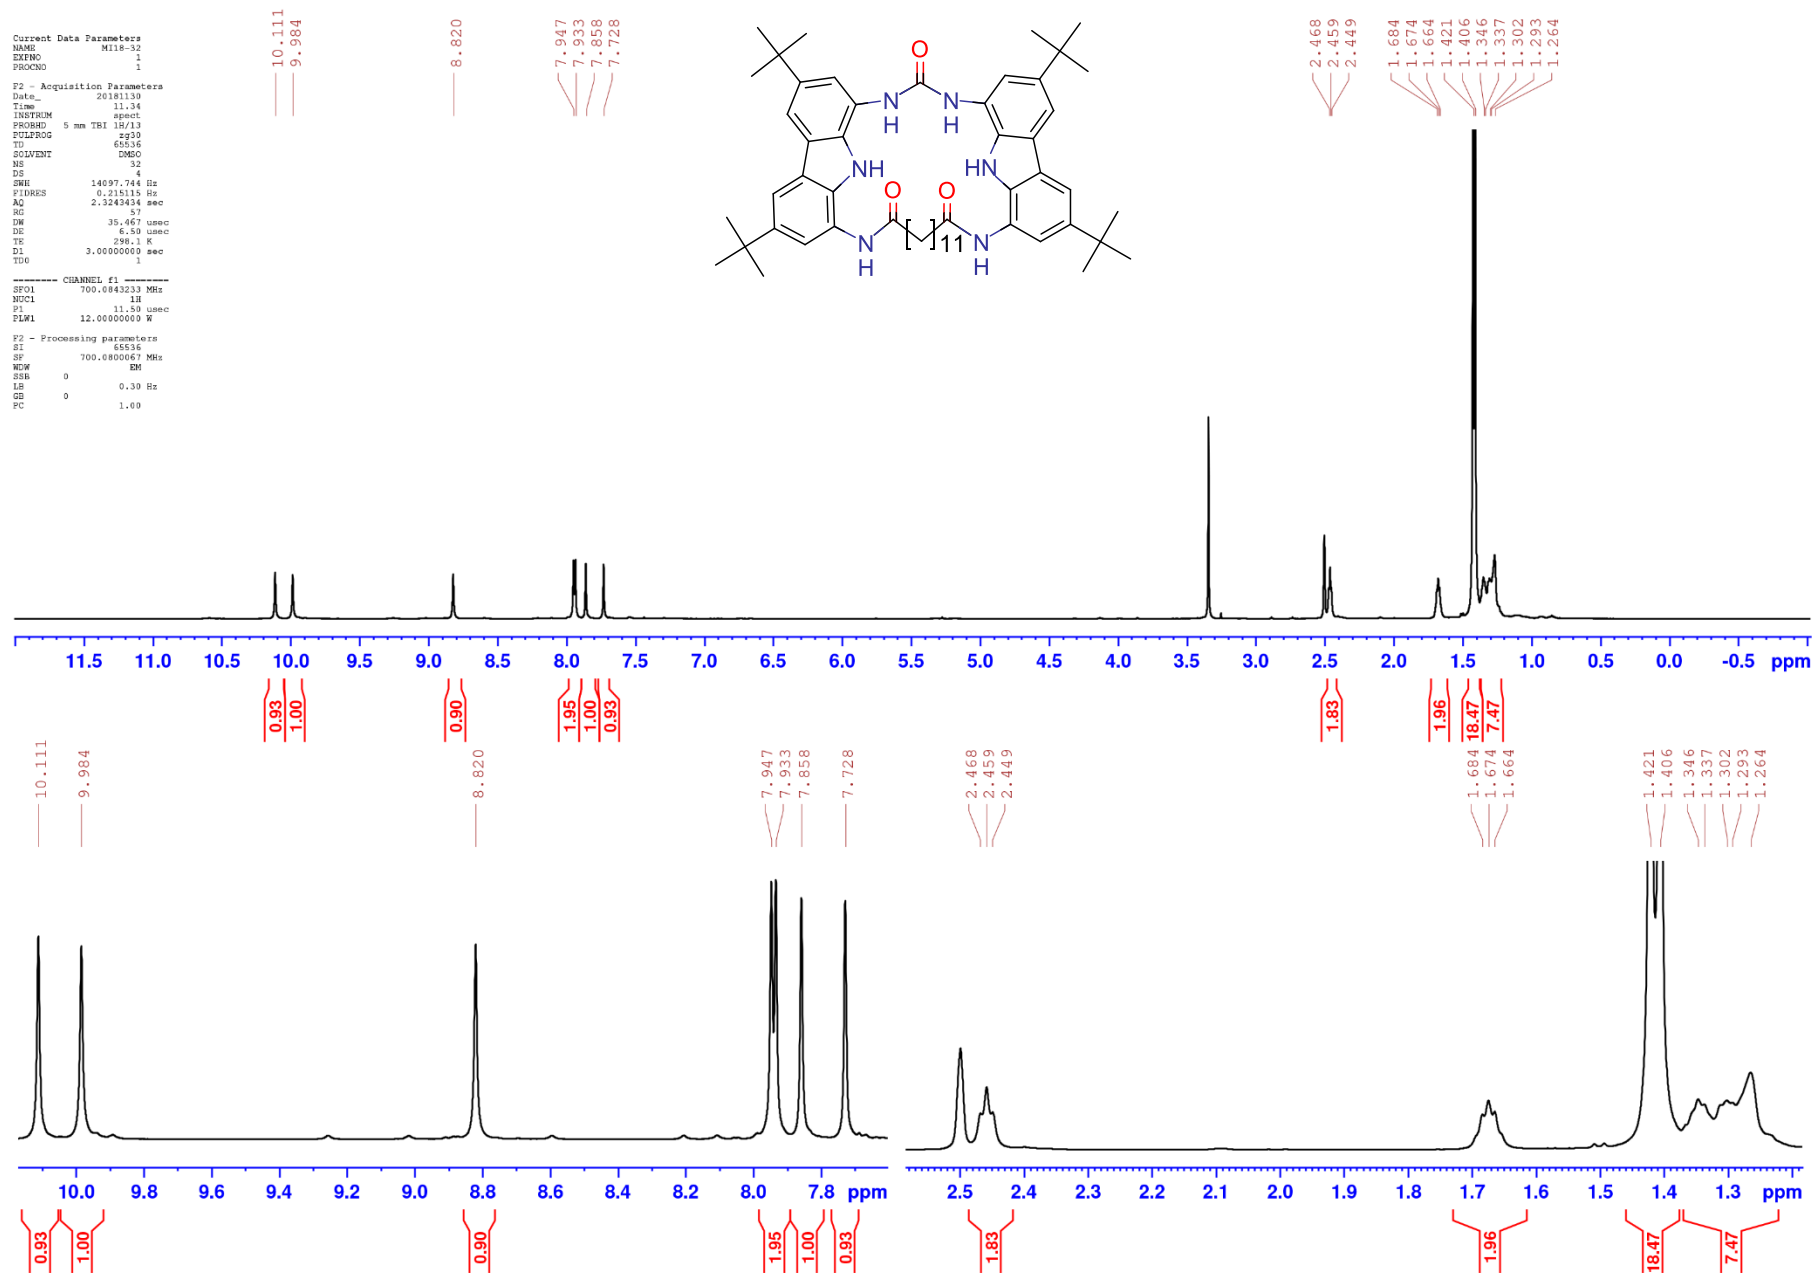

<sup>13</sup>C NMR spectrum (700.1 MHz) of compound **MC011**

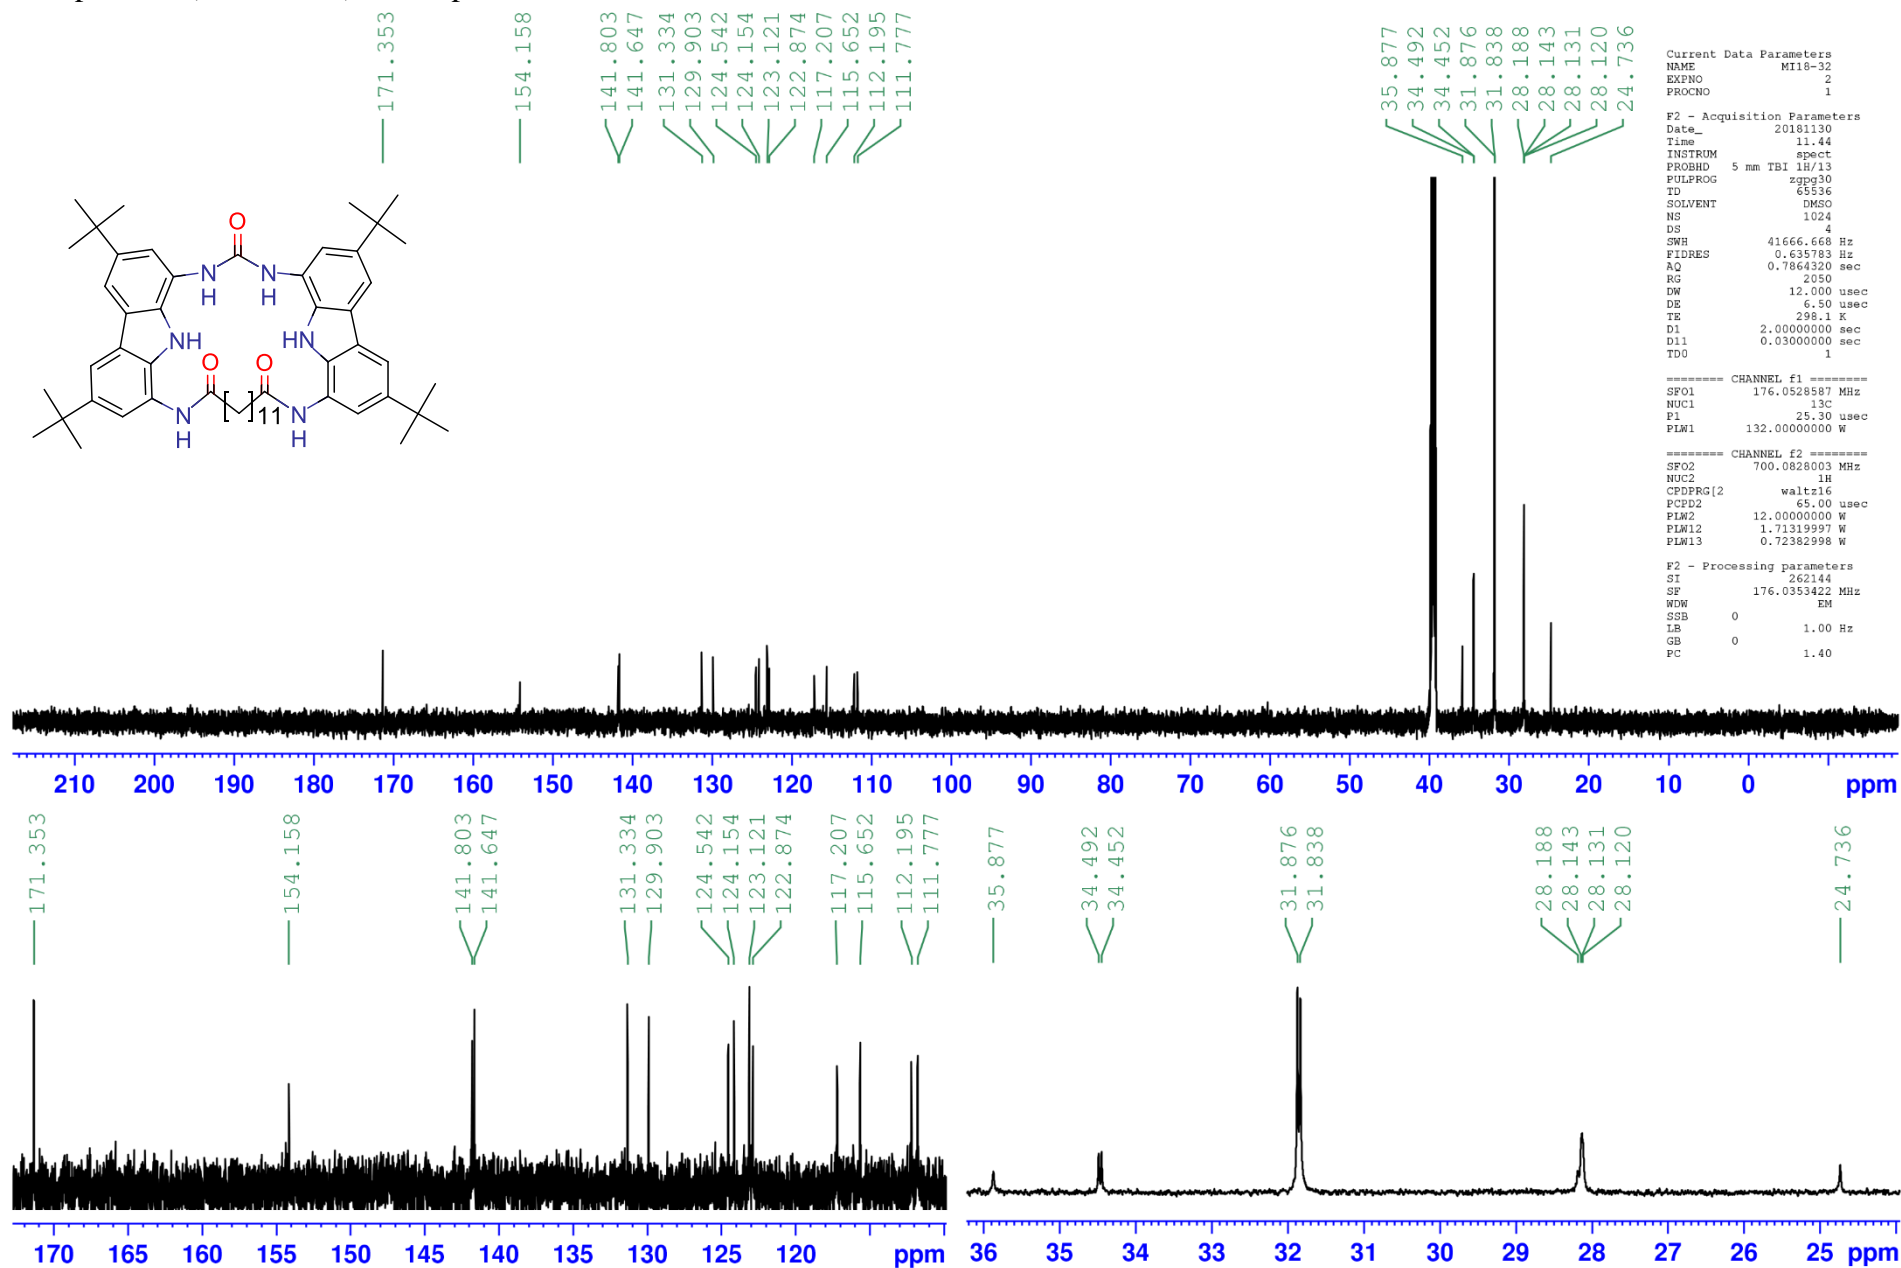

$^1\text{H}$ - $^{13}\text{C}$  HSQC spectrum (700.1 MHz) of compound **MC011**

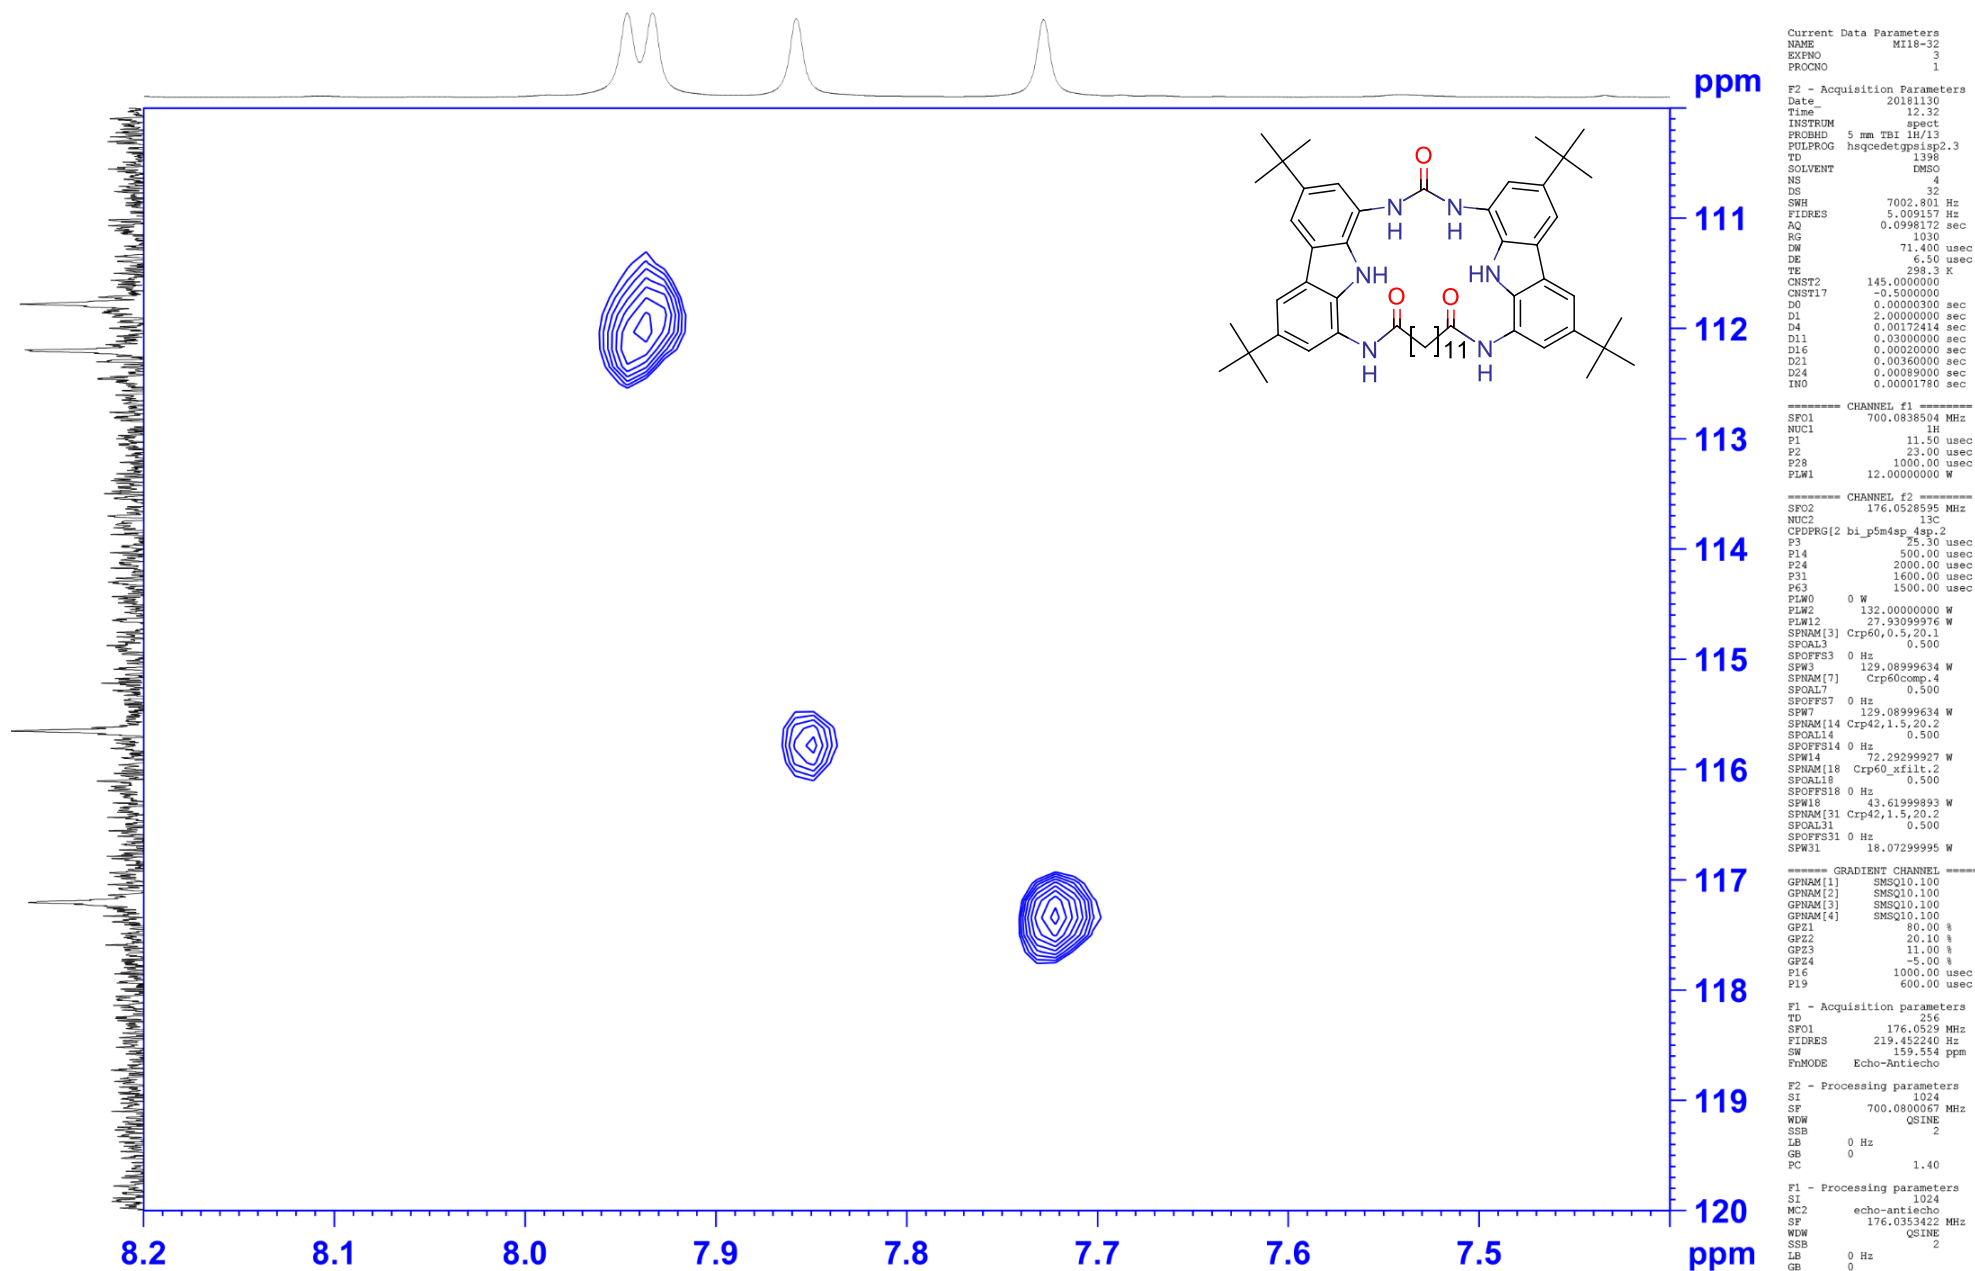



$^1\text{H}$ - $^{13}\text{C}$  HMBC spectrum (700.1 MHz) of compound **MC011**

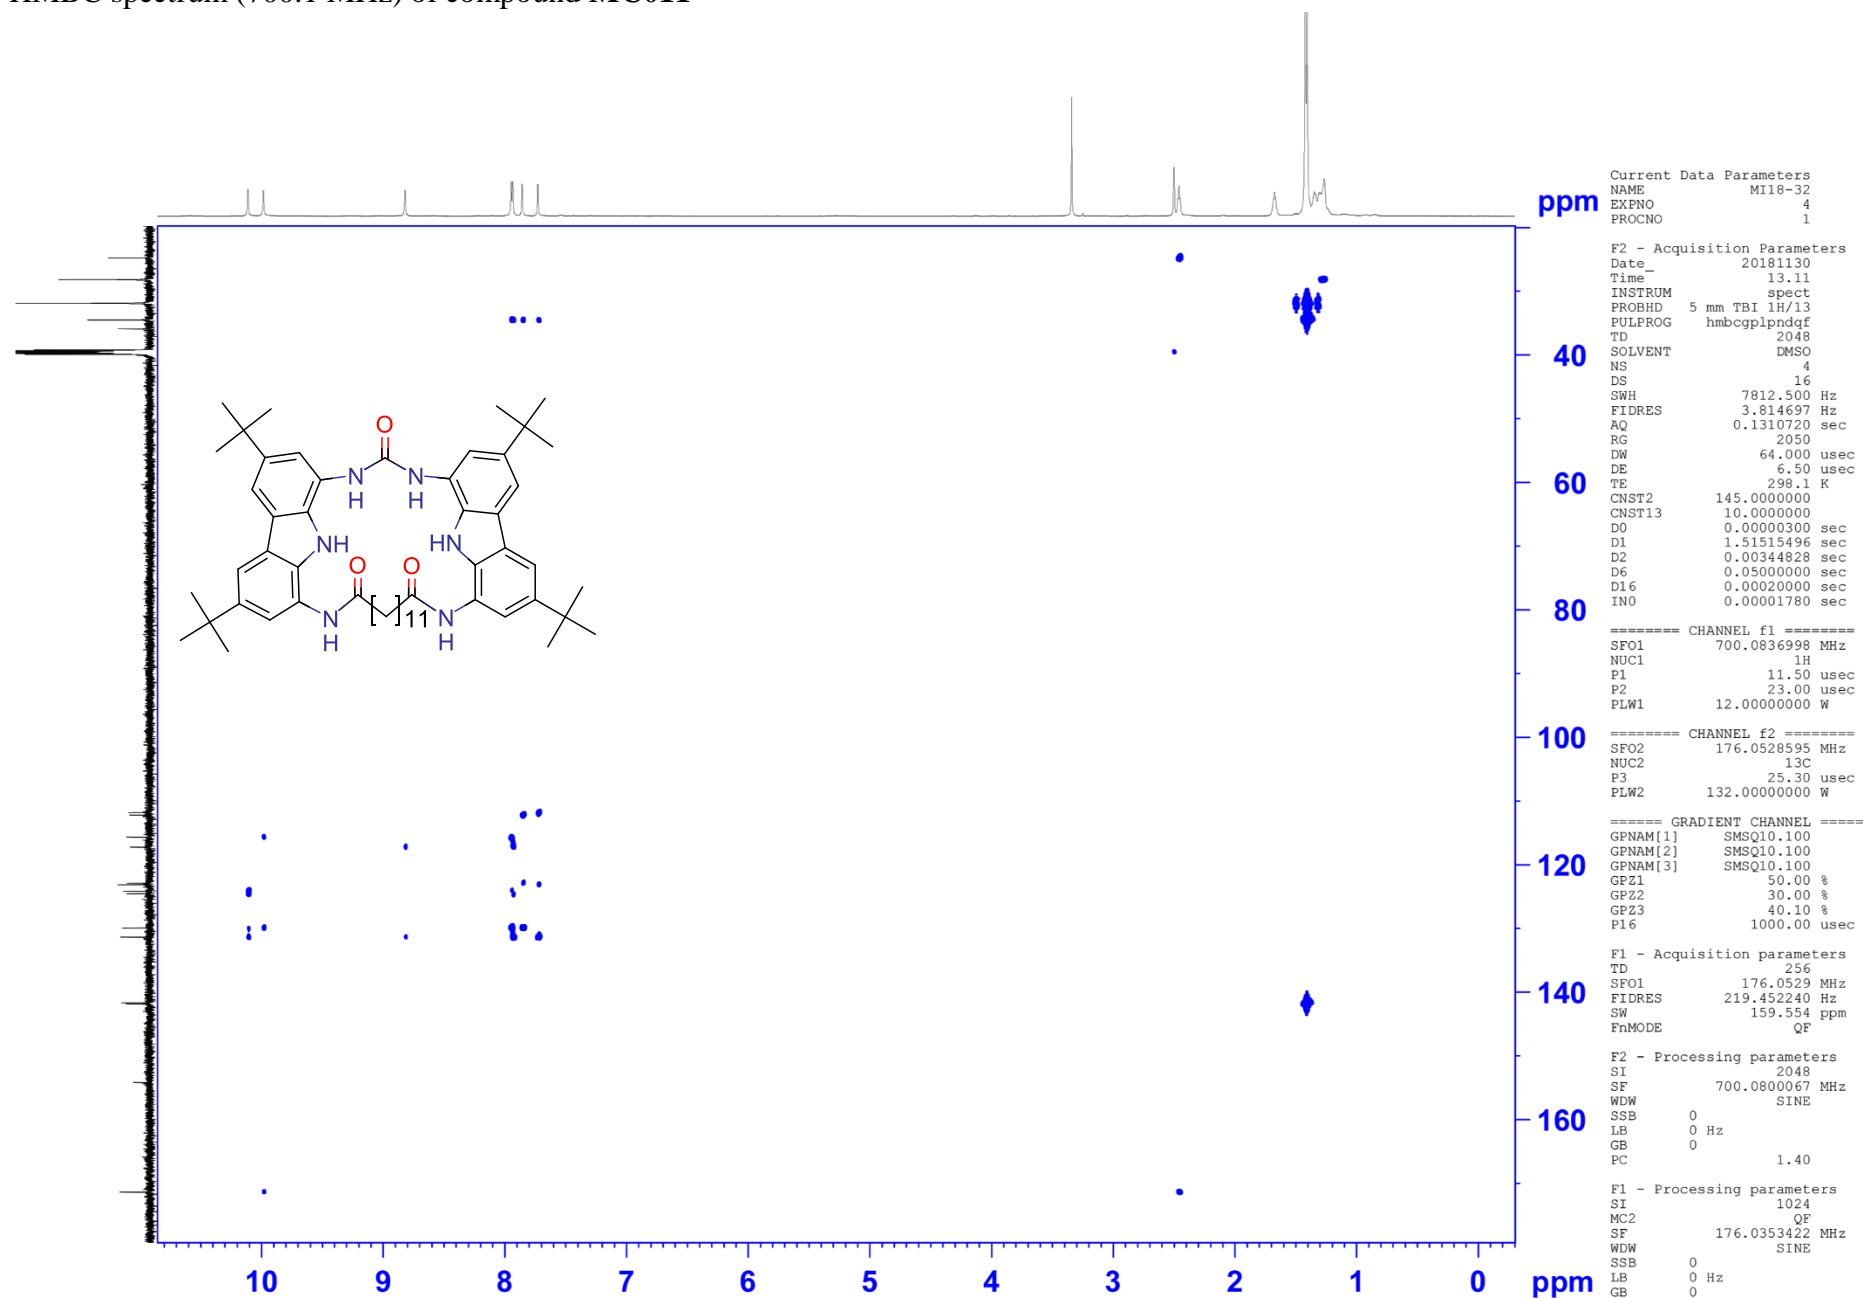

# HRMS spectrum of compound MC011

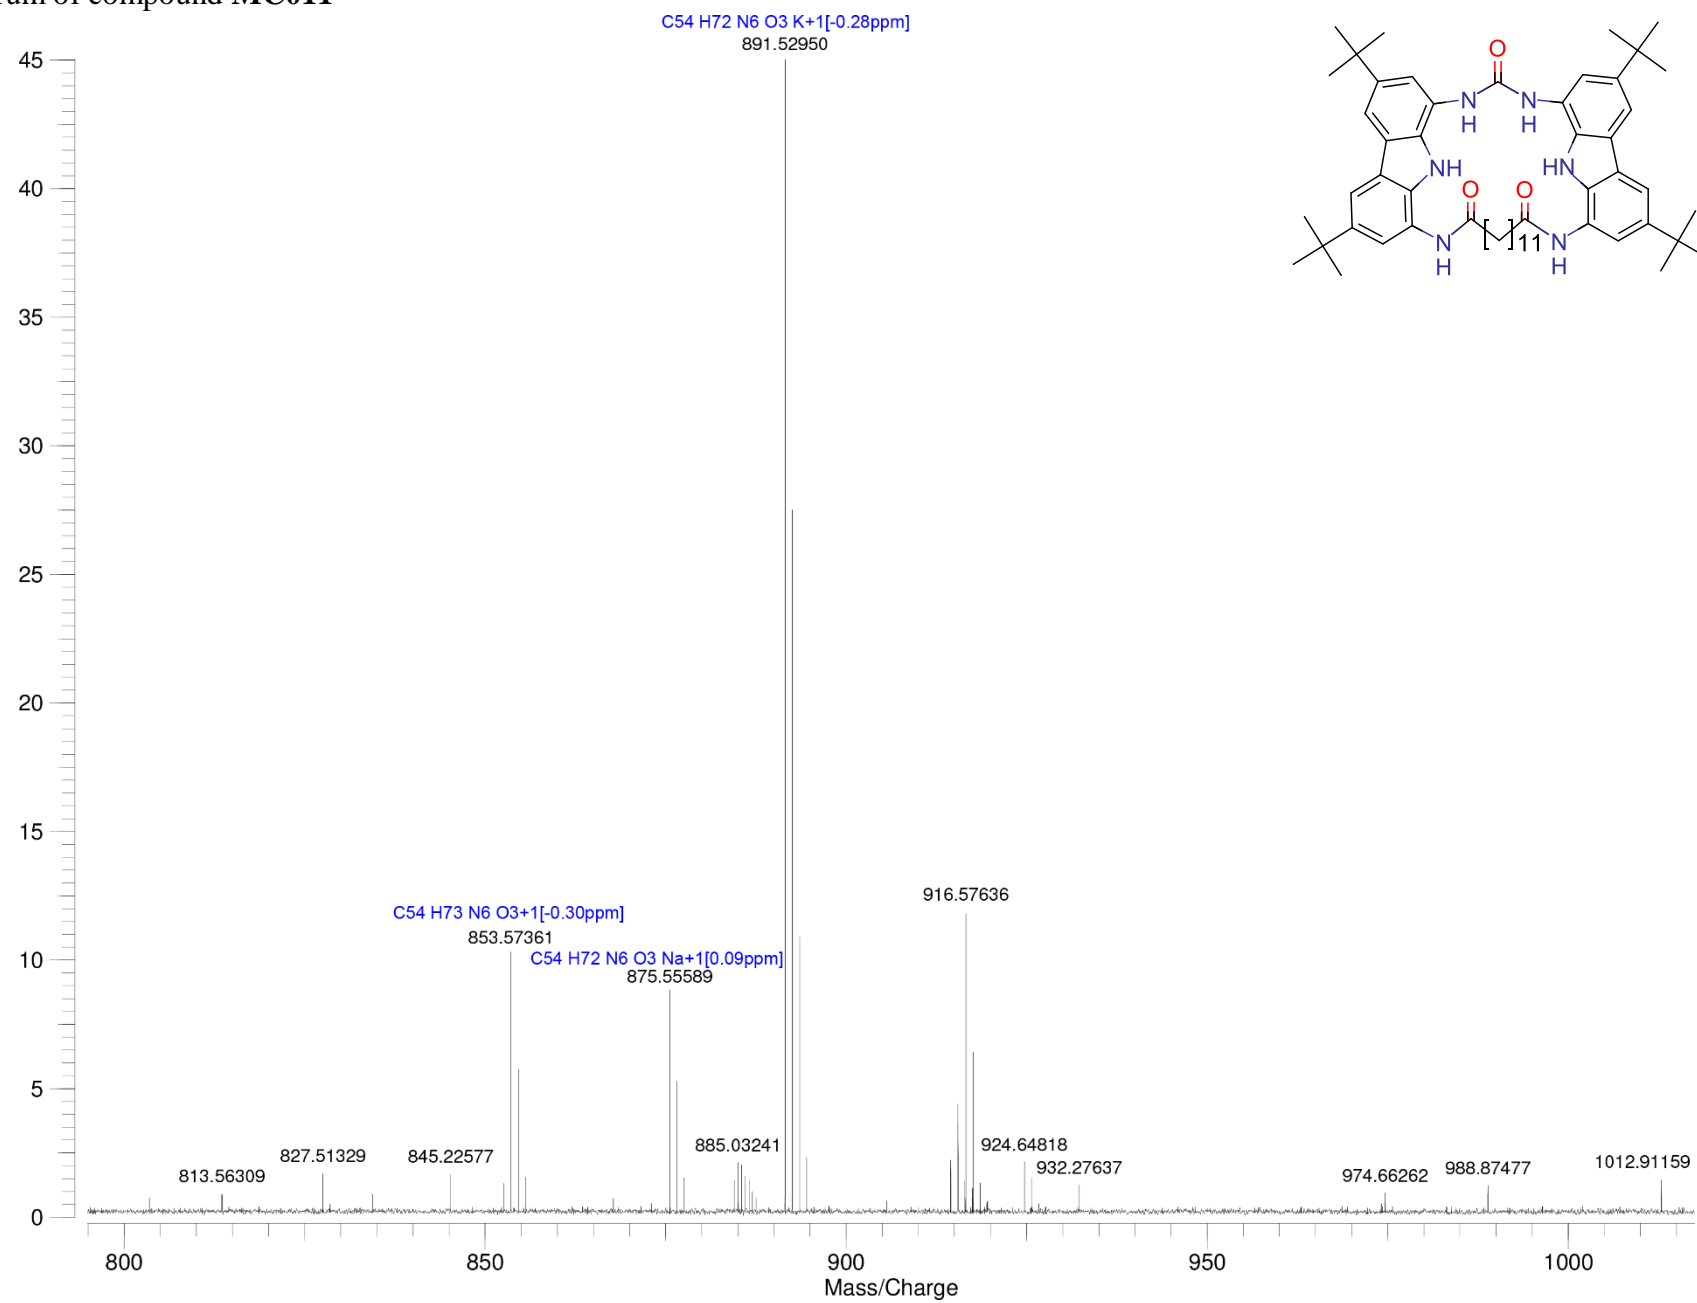

<sup>1</sup>H NMR spectrum (700.1 MHz) of compound **MC012**

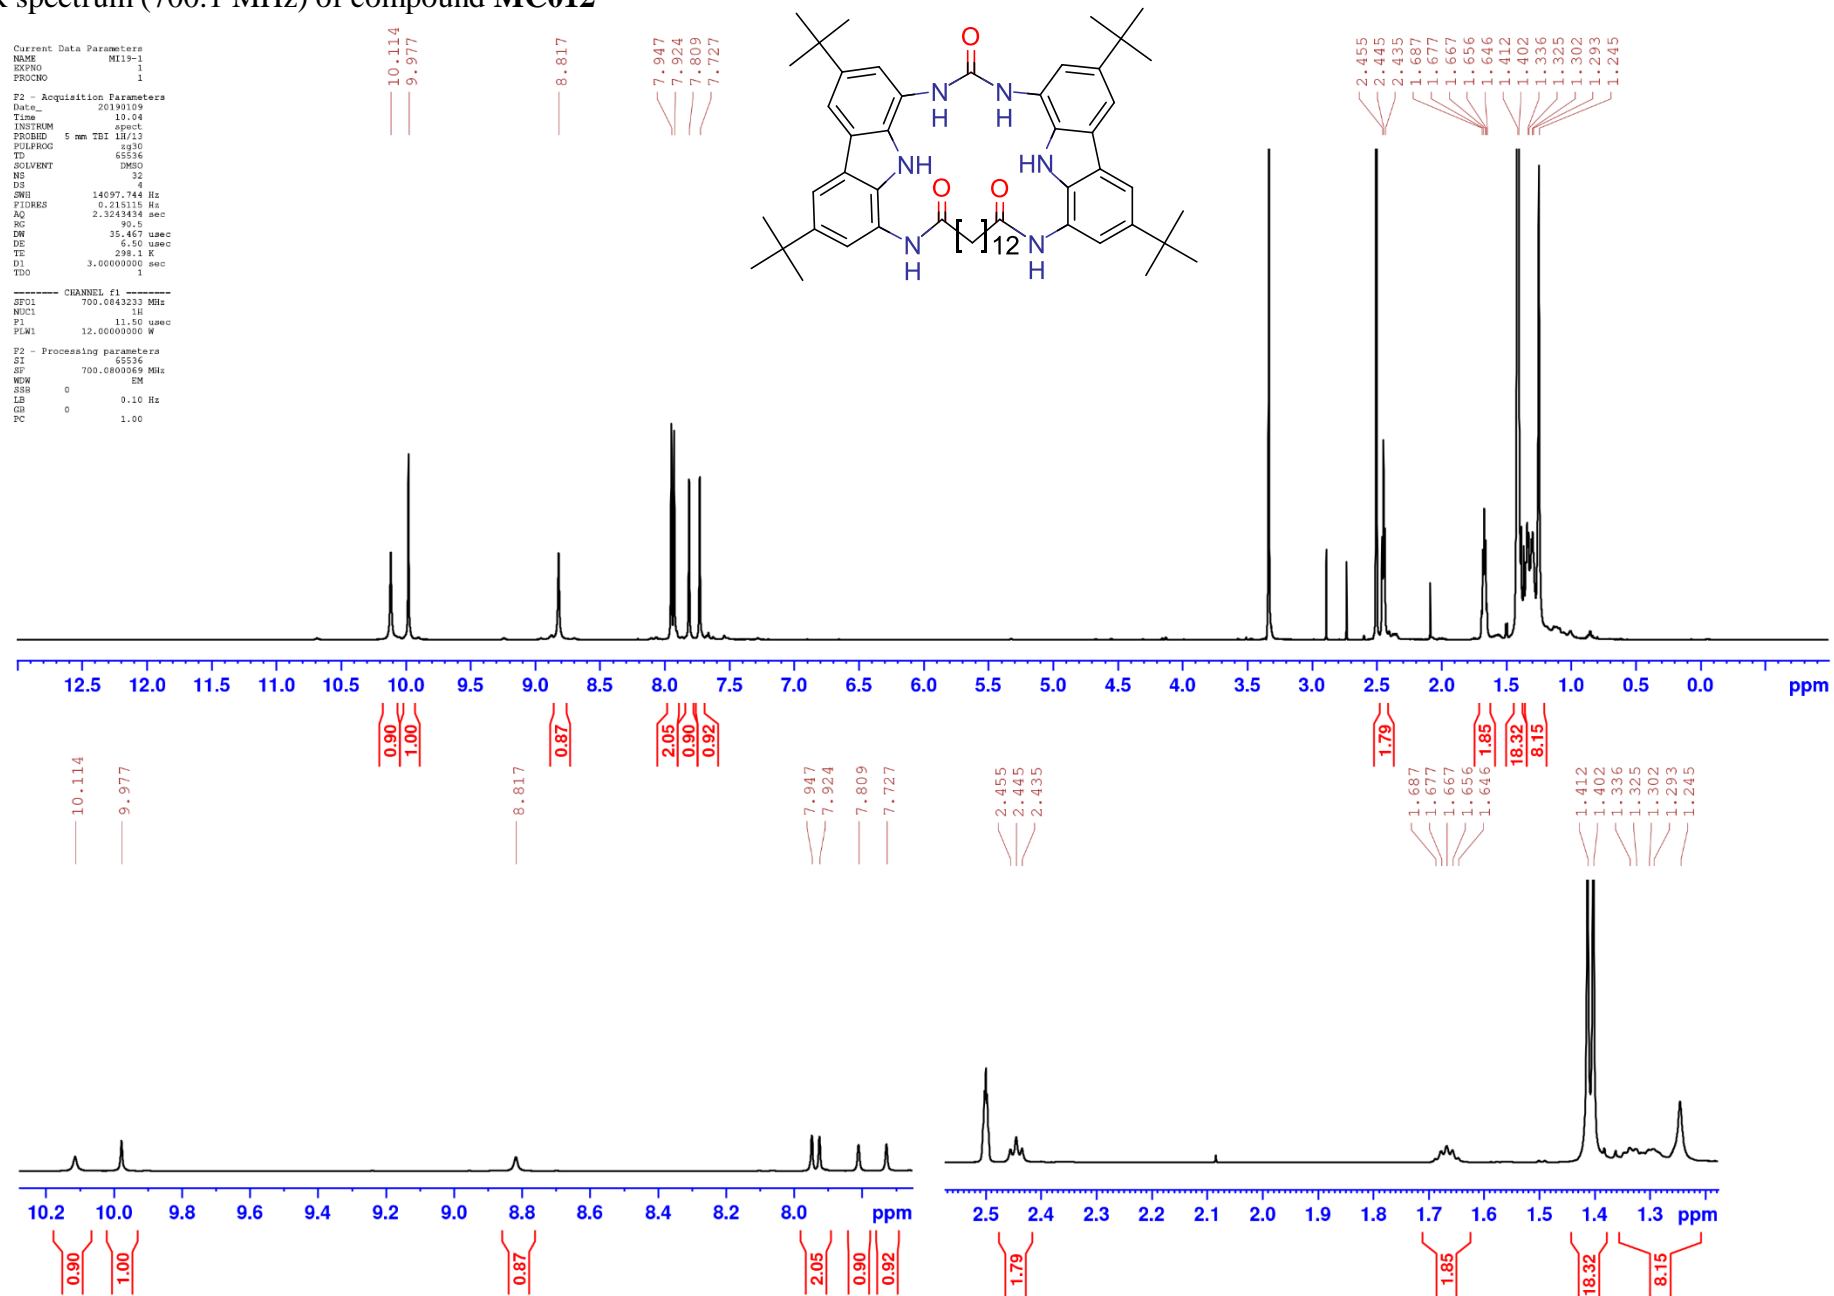

$^{13}\text{C}$  NMR spectrum (700.1 MHz) of compound **MC012**

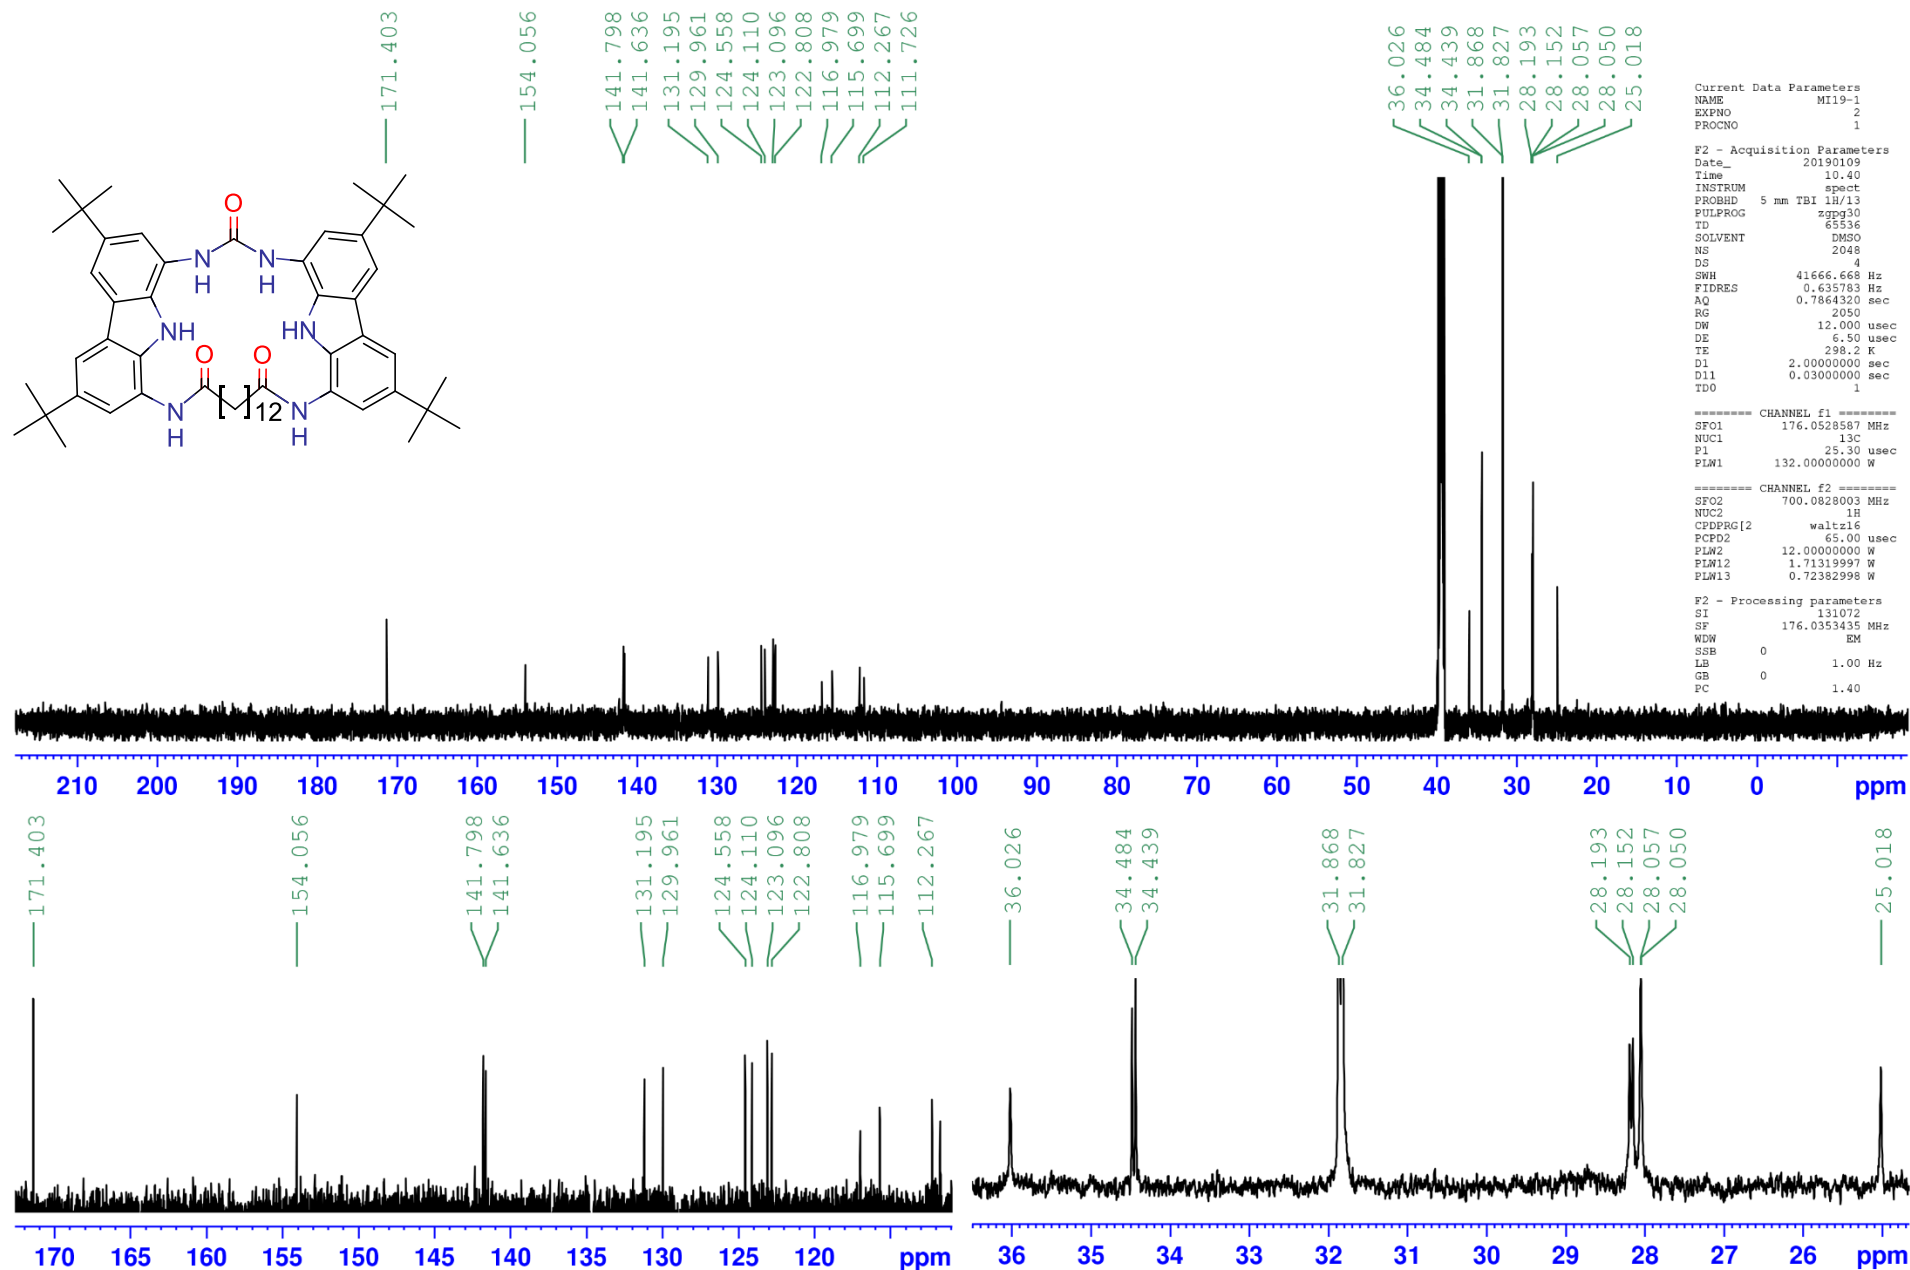

$^1\text{H}$ - $^{13}\text{C}$  HSQC spectrum (700.1 MHz) of compound **MC012**

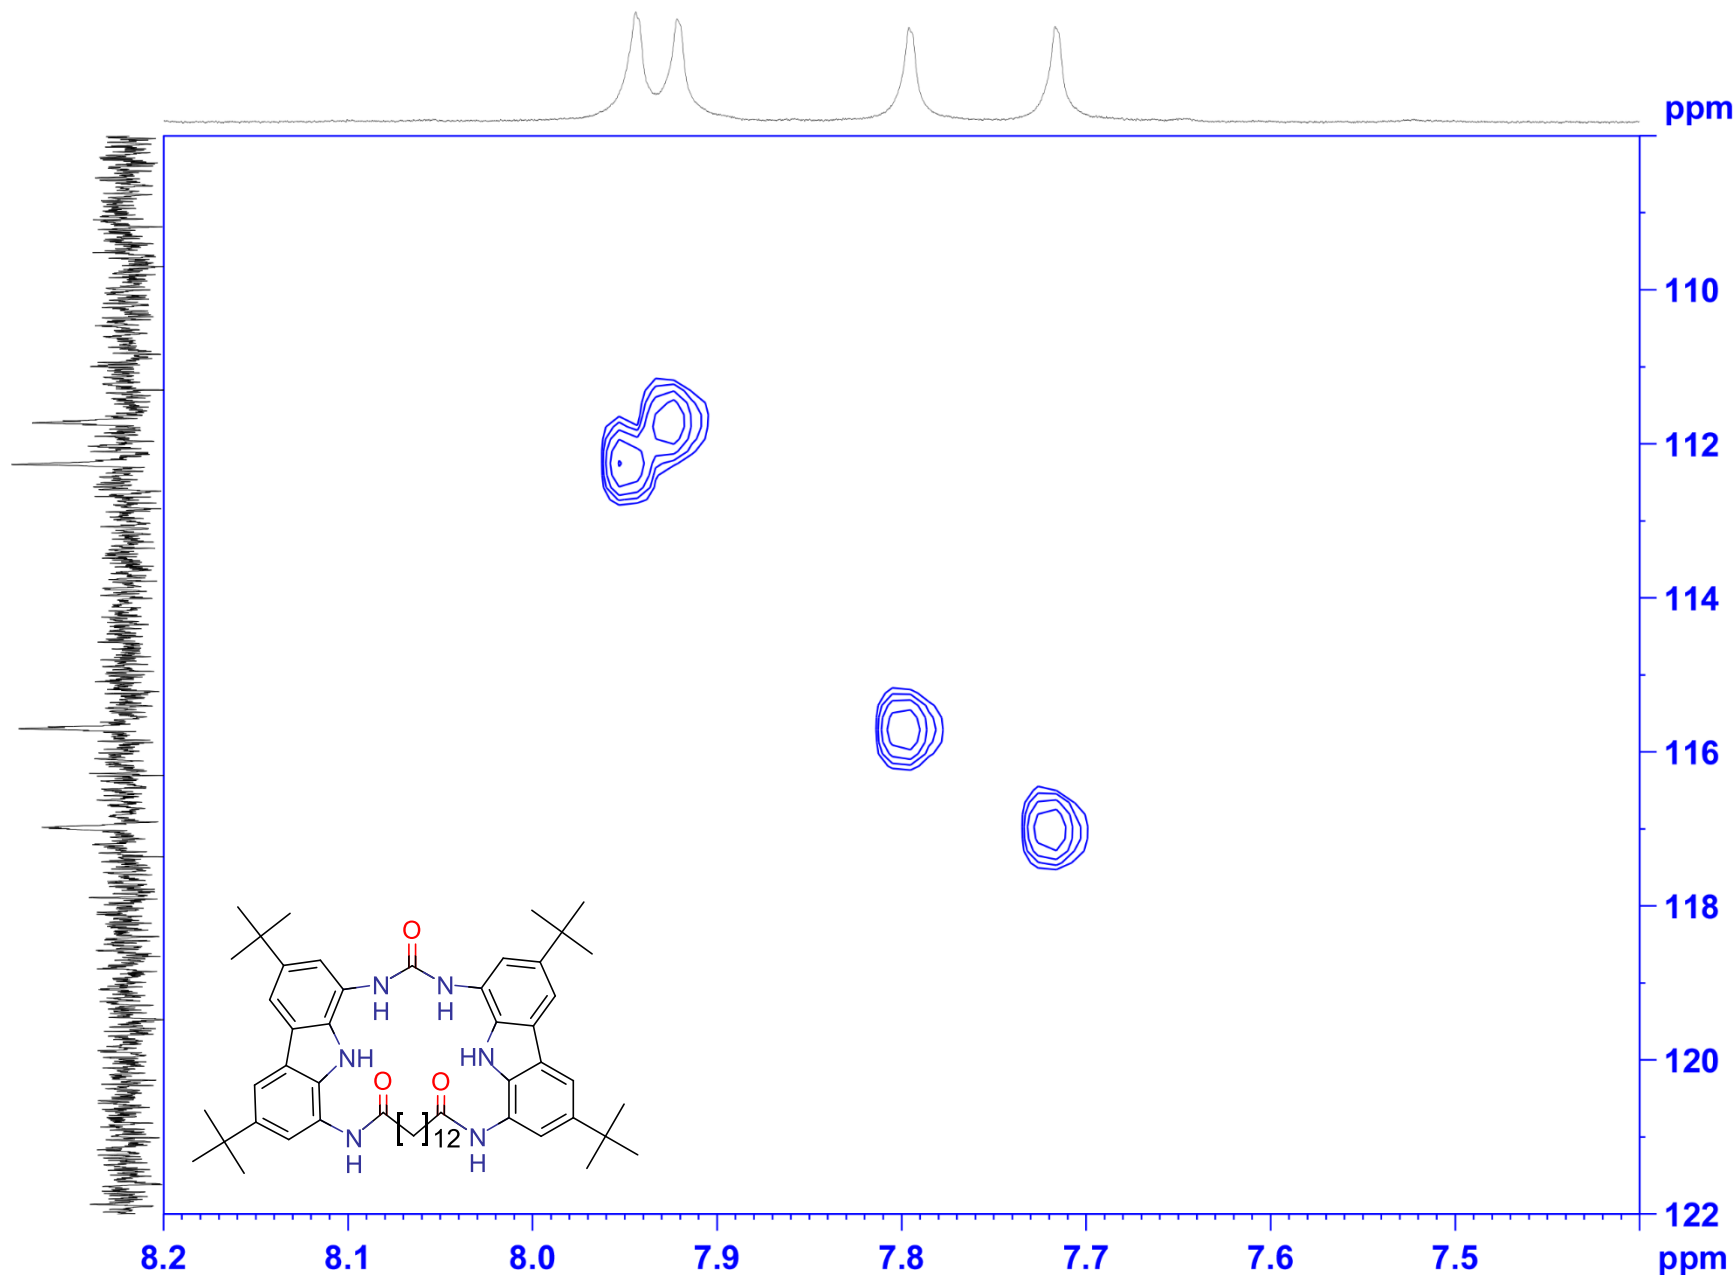

```

Current Data Parameters
NAME          MI19-1
EXPNO         5
PROCNO        1

F2 - Acquisition Parameters
Date_         20190705
Time          16.55
INSTRUM       spect
PROBHD        5 mm PABBO BB-
PULPROG       hsqcetgpsisp2.3
TD            2048
SOLVENT       DMSO
NS            8
DS            32
SWH           7002.801 Hz
FIDRES       3.419337 Hz
AQ           0.1462272 sec
RG           2050
DW           71.400 usec
DE           6.50 usec
TE           299.2 K
CNST2        145.0000000
CNST17       -0.5000000
D0           0.00000300 sec
D1           2.00000000 sec
D4           0.00172414 sec
D11          0.03000000 sec
D16          0.00020000 sec
D21          0.00360000 sec
D24          0.00089000 sec
INO          0.00001780 sec

===== CHANNEL f1 =====
SFO1         700.0838504 MHz
NUC1          1H
F1           15.06 usec
P2           30.12 usec
P28          1000.00 usec
PLW1         26.00000000 W

===== CHANNEL f2 =====
SFO2         176.0528595 MHz
NUC2          13C
CPDPRG2       bi_p5m4sp_4sp.2
P3           9.57 usec
P14          500.00 usec
P24          2000.00 usec
P31          1600.00 usec
P63          1500.00 usec
PLW0          0 W
PLW2         60.00000000 W
ELW12        1.81659997 W
SPNAM[3]     Crp60,0.5,20.1
SFOAL3        0 Hz
SPOFFS3       8.39589977 W
SPW3         8.39589977 W
SPNAM[7]     Crp60comp.4
SFOAL7        0 Hz
SPOFFS7       8.39589977 W
SPW7         8.39589977 W
SPNAM[14]    Crp42,1.5,20.2
SFOAL14       0 Hz
SPOFFS14      4.70170021 W
SPW14        4.70170021 W
SPNAM[18]    Crp60_xfilt.2
SFOAL18       0 Hz
SPOFFS18      0.500
SPW18        2.83690000 W
SPNAM[31]    Crp42,1.5,20.2
SFOAL31       0 Hz
SPOFFS31      1.17540002 W
SPW31        1.17540002 W

===== GRADIENT CHANNEL =====
GPNAM[1]     SMSQ10.100
GPNAM[2]     SMSQ10.100
GPNAM[3]     SMSQ10.100
GPNAM[4]     SMSQ10.100
GPZ1         80.00 %
GPZ2         20.10 %
GPZ3         11.00 %
GPZ4         -5.00 %
P16          1000.00 usec
P19          600.00 usec

F1 - Acquisition parameters
TD           256
SFO1         176.0529 MHz
FIDRES       219.452240 Hz
SW           159.554 ppm
FnMODE       Echo-Antiecho

F2 - Processing parameters
SI           1024
SF           700.0800069 MHz
WDW          QSINE
SSB          2
LB           0 Hz
GB           0
PC           1.40

F1 - Processing parameters
SI           1024
WC2          echo-antiecho
SF           176.0353435 MHz
WDW          QSINE
SSB          2
LB           0 Hz
GB           0
  
```

$^1\text{H}$ - $^{13}\text{C}$  HMBC spectrum (700.1 MHz) of compound **MC012**

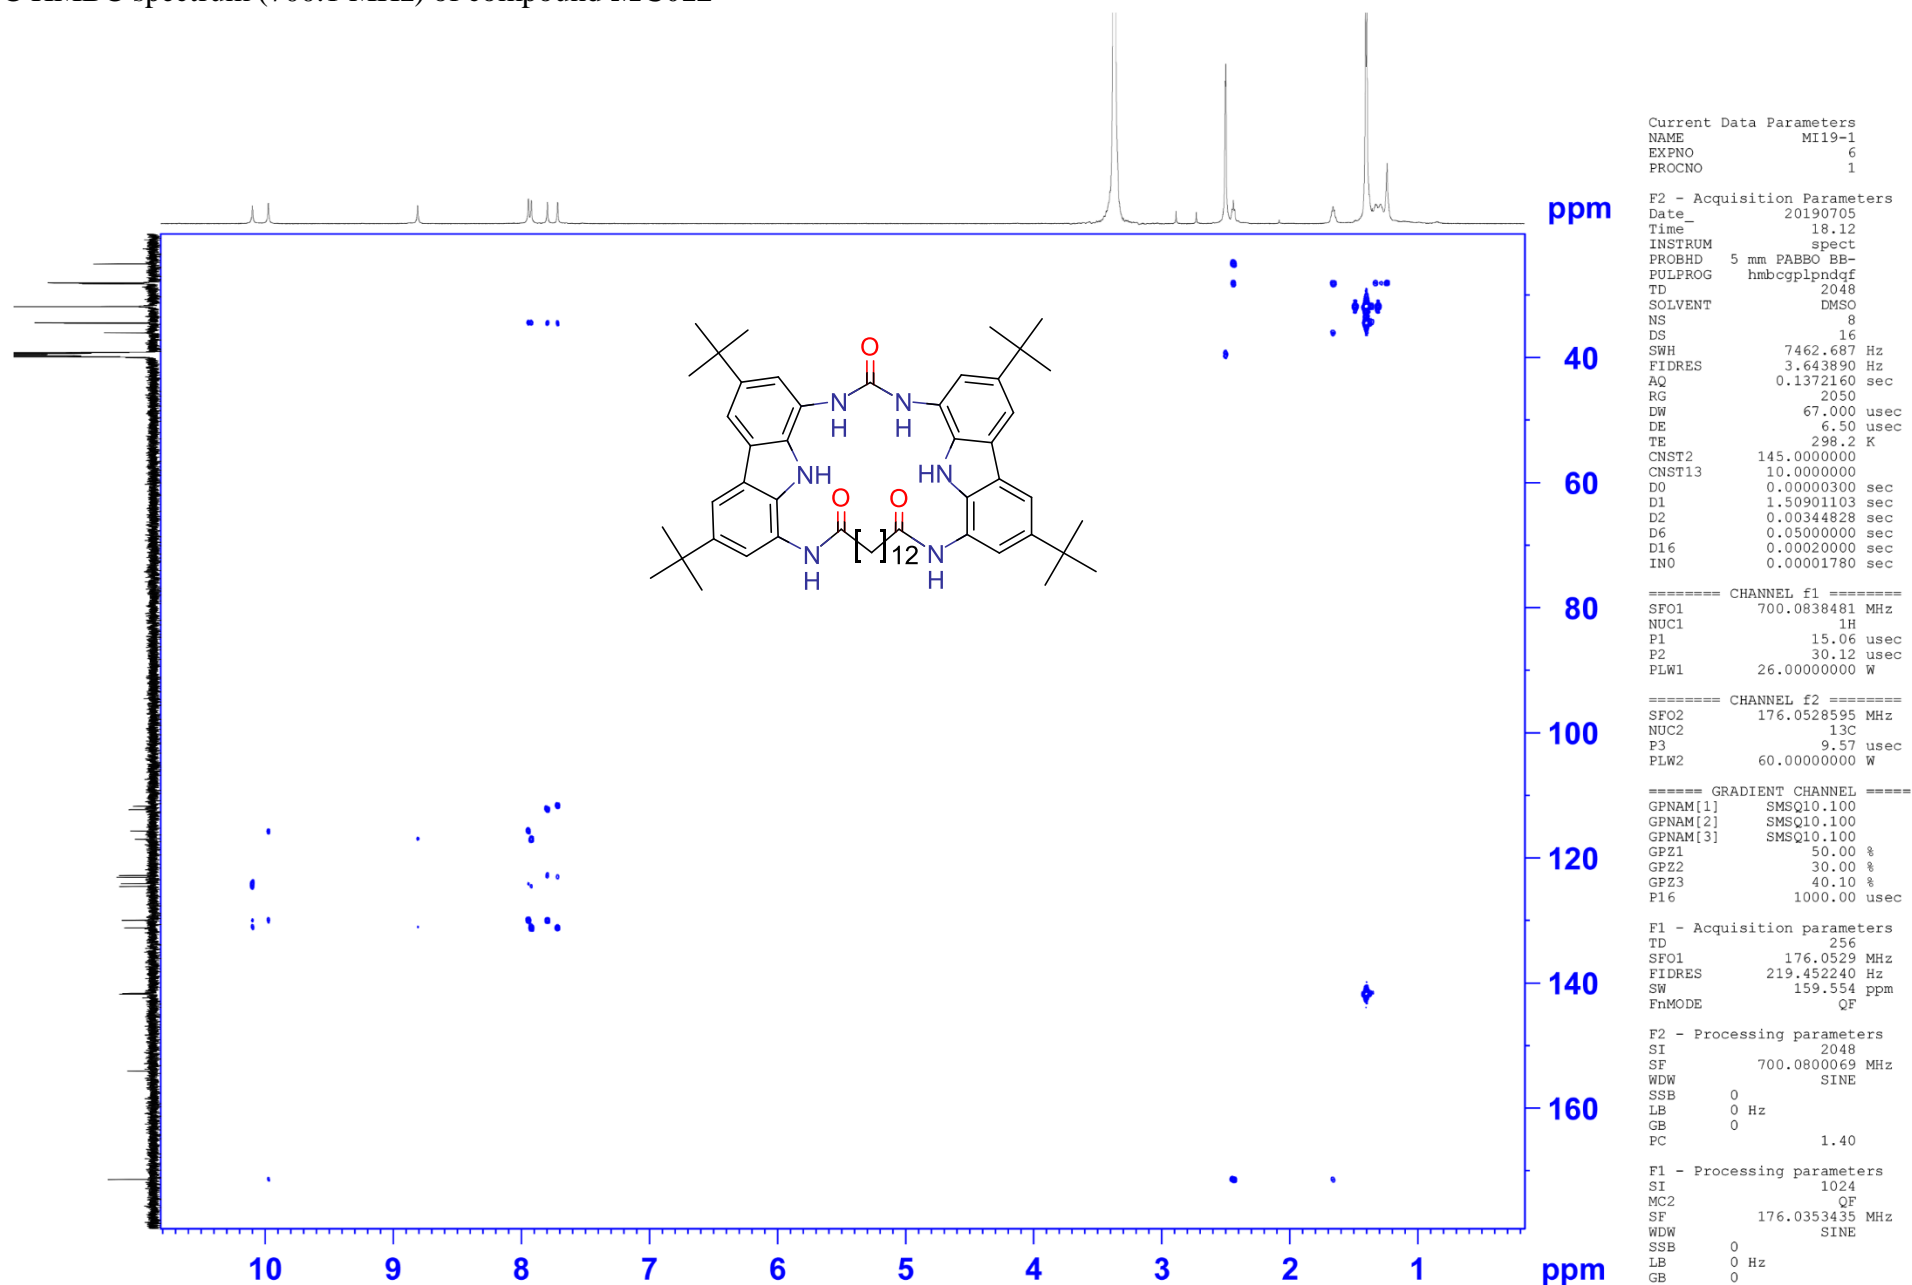

# HRMS spectrum of compound MC012

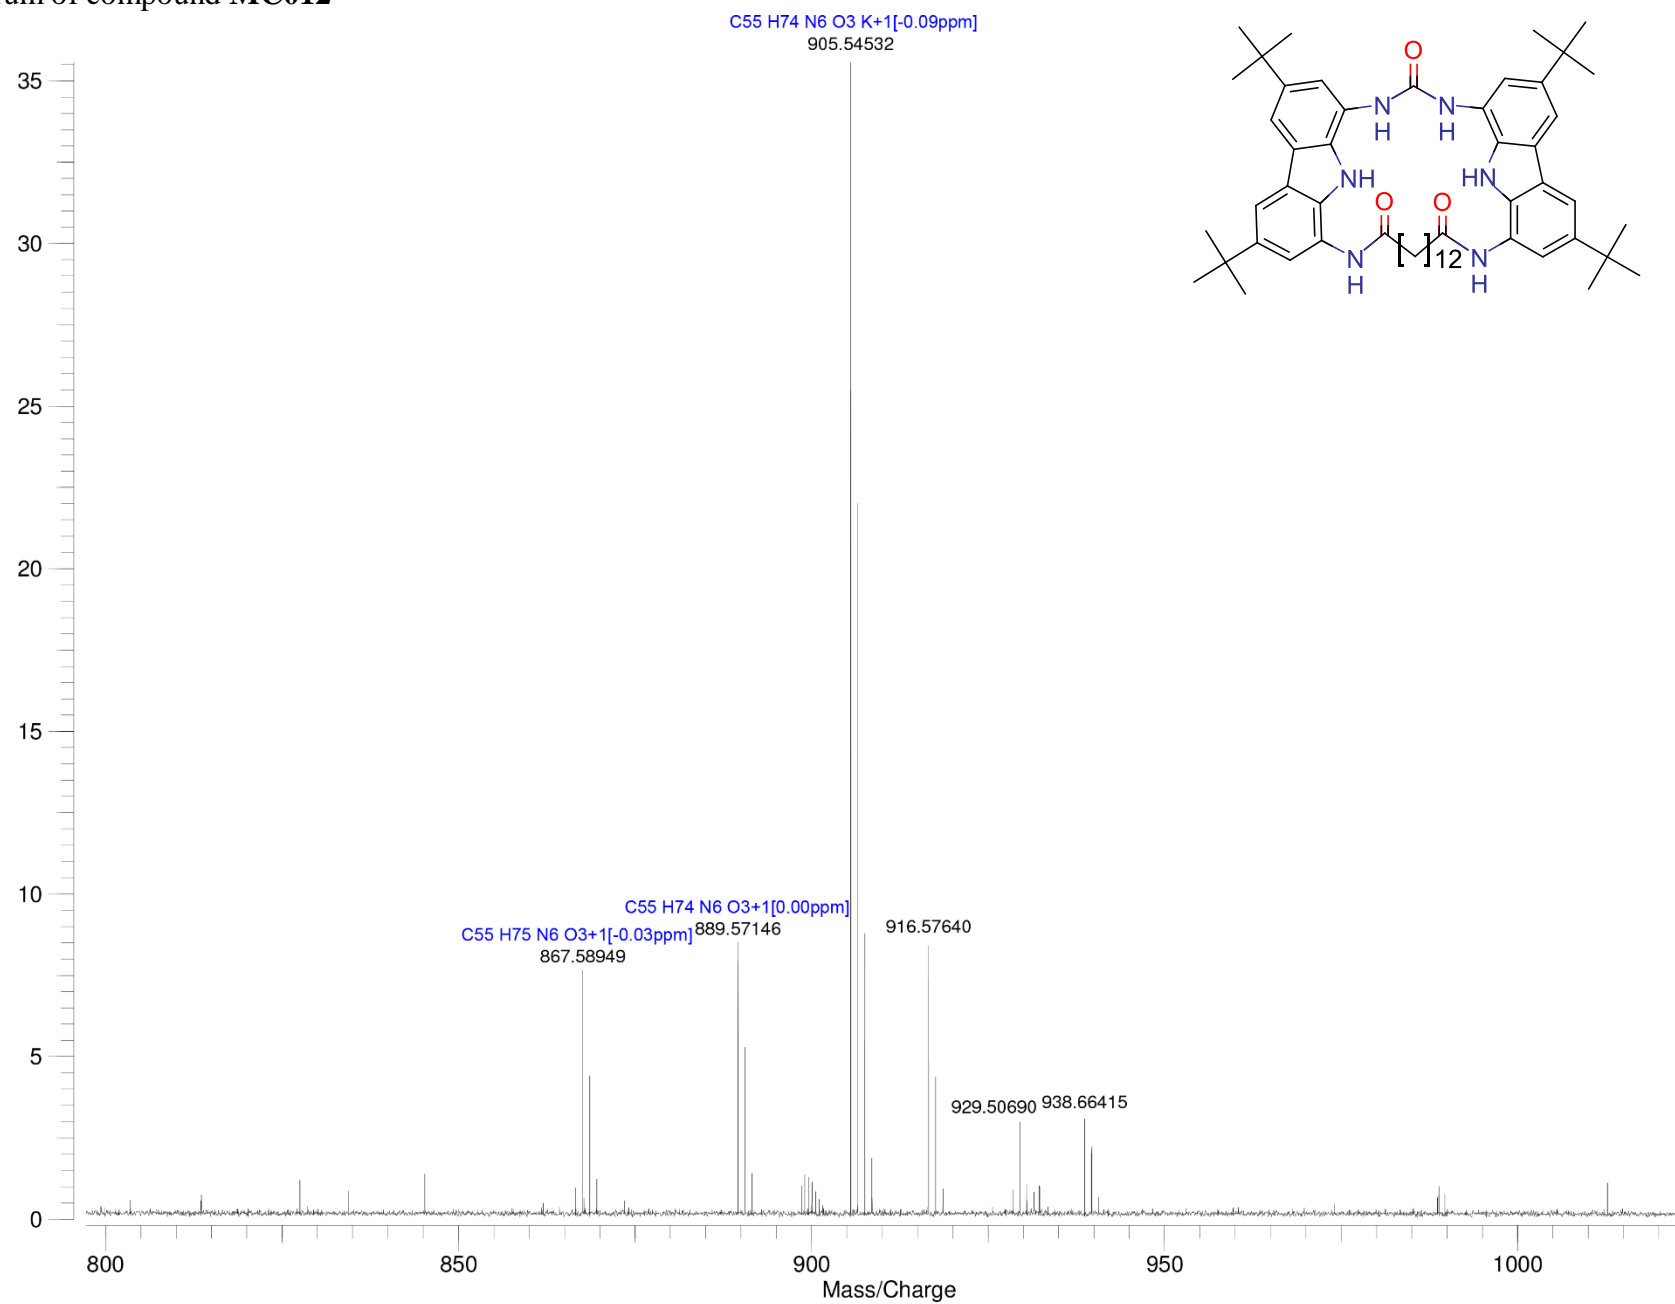

# <sup>1</sup>H NMR spectrum (700.1 MHz) of compound MC013

Current Data Parameters  
NAME MI18-36  
EXPNO 1  
PROCNO 1  
F2 - Acquisition Parameters  
Date\_ 20181218  
Time 14.36  
INSTRUM spect  
PROBHD 5 mm TBI 1H/13  
PULPROG zg30  
TD 65536  
SOLVENT DMSO  
NS 32  
DS 4  
SWH 14997.144 Hz  
FIDRES 0.215115 Hz  
AQ 2.3243434 sec  
RG 90.5  
DW 35.467 usec  
DE 6.50 usec  
TE 298.1 K  
D1 3.0000000 sec  
TD0 1  
===== CHANNEL f1 =====  
SFO1 700.0843233 MHz  
NUC1 1H  
P1 11.50 usec  
PL1 12.00000000 W  
F2 - Processing parameters  
SI 65536  
SF 700.0800084 MHz  
WDW DM  
SSB 0  
LB 0.10 Hz  
GB 0  
PC 1.00

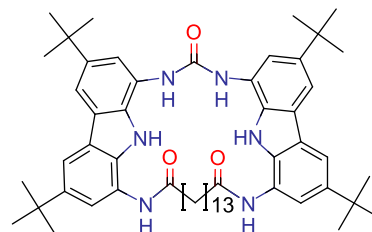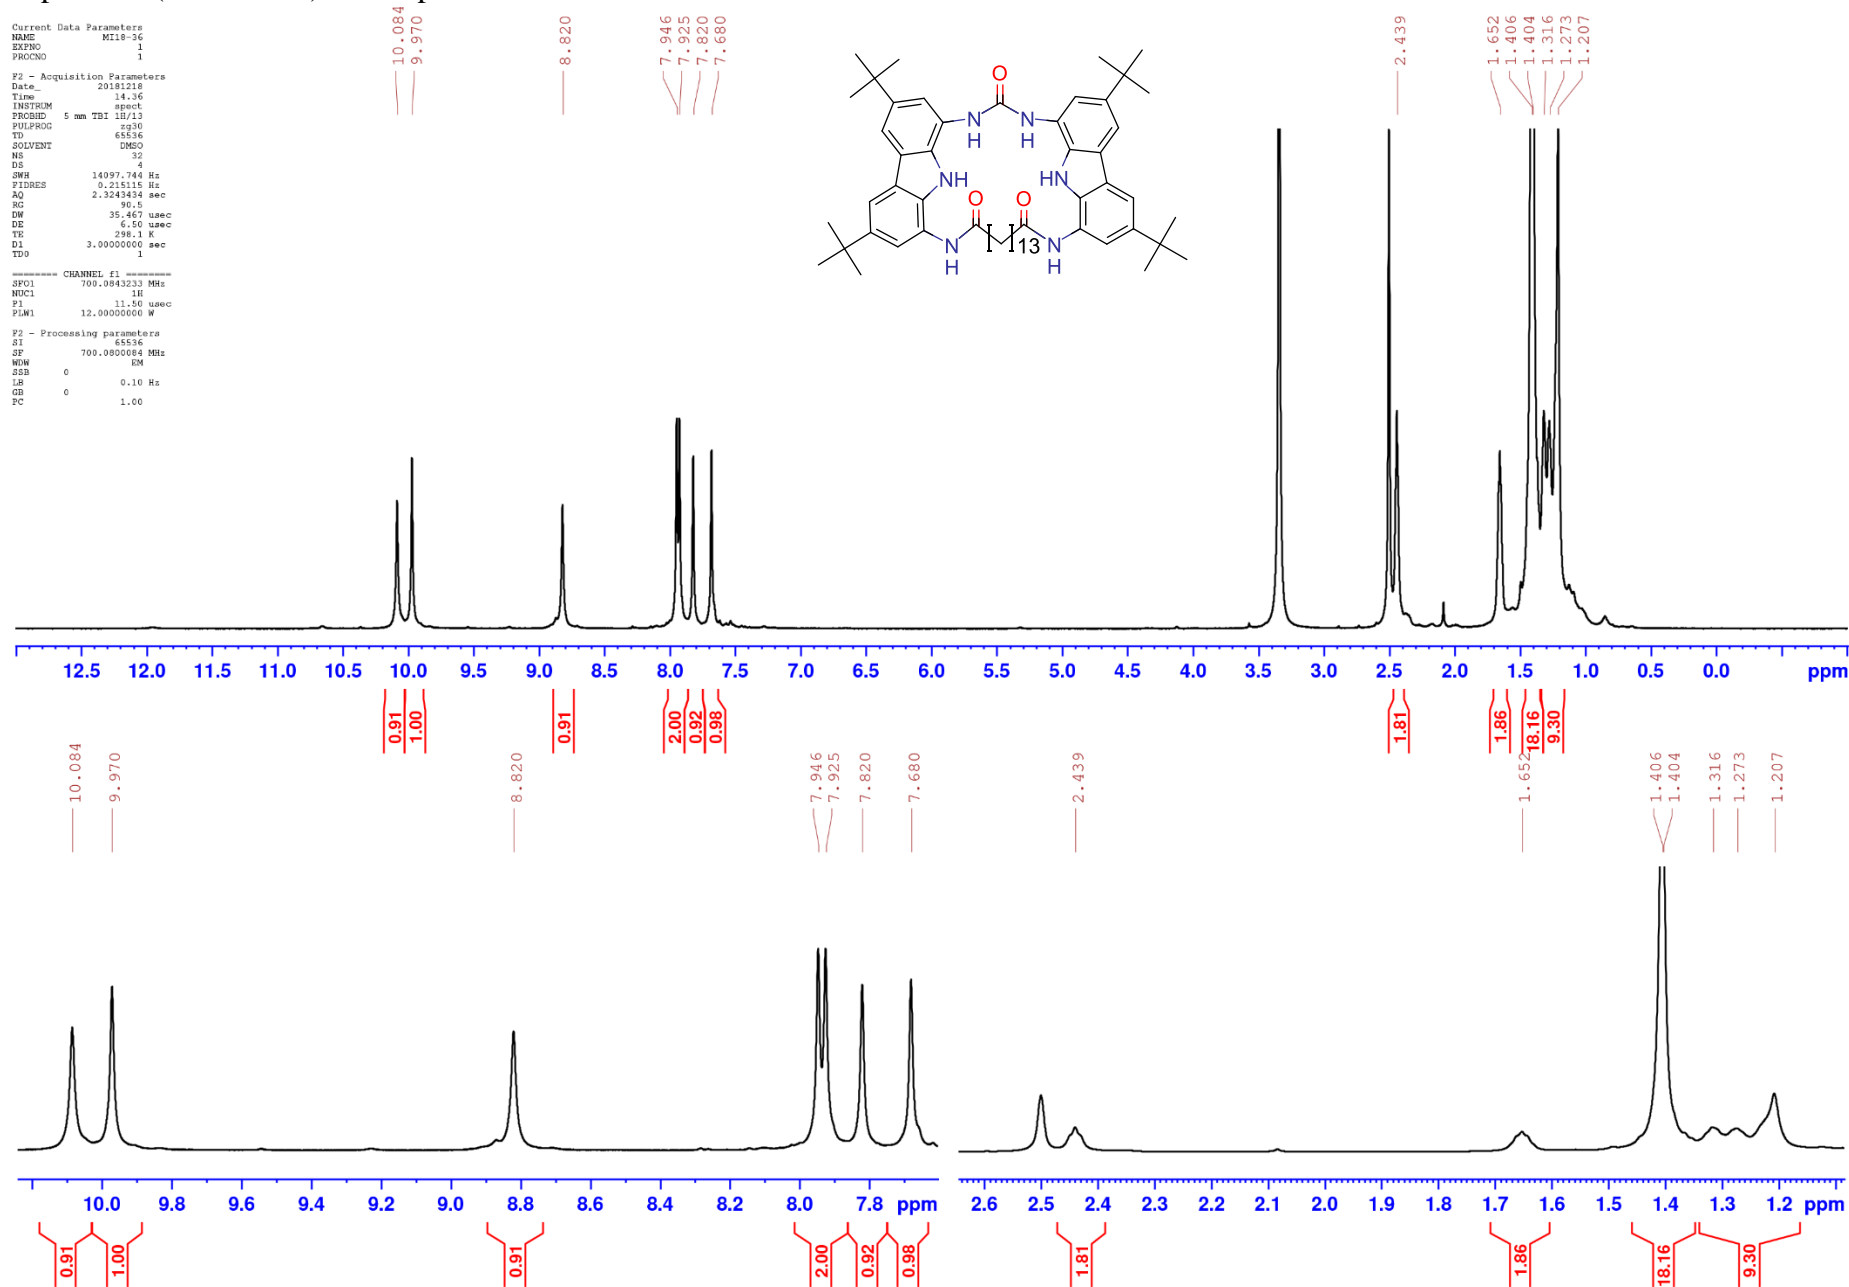



$^{13}\text{C}$  NMR spectrum (700.1 MHz) of compound **MC013**

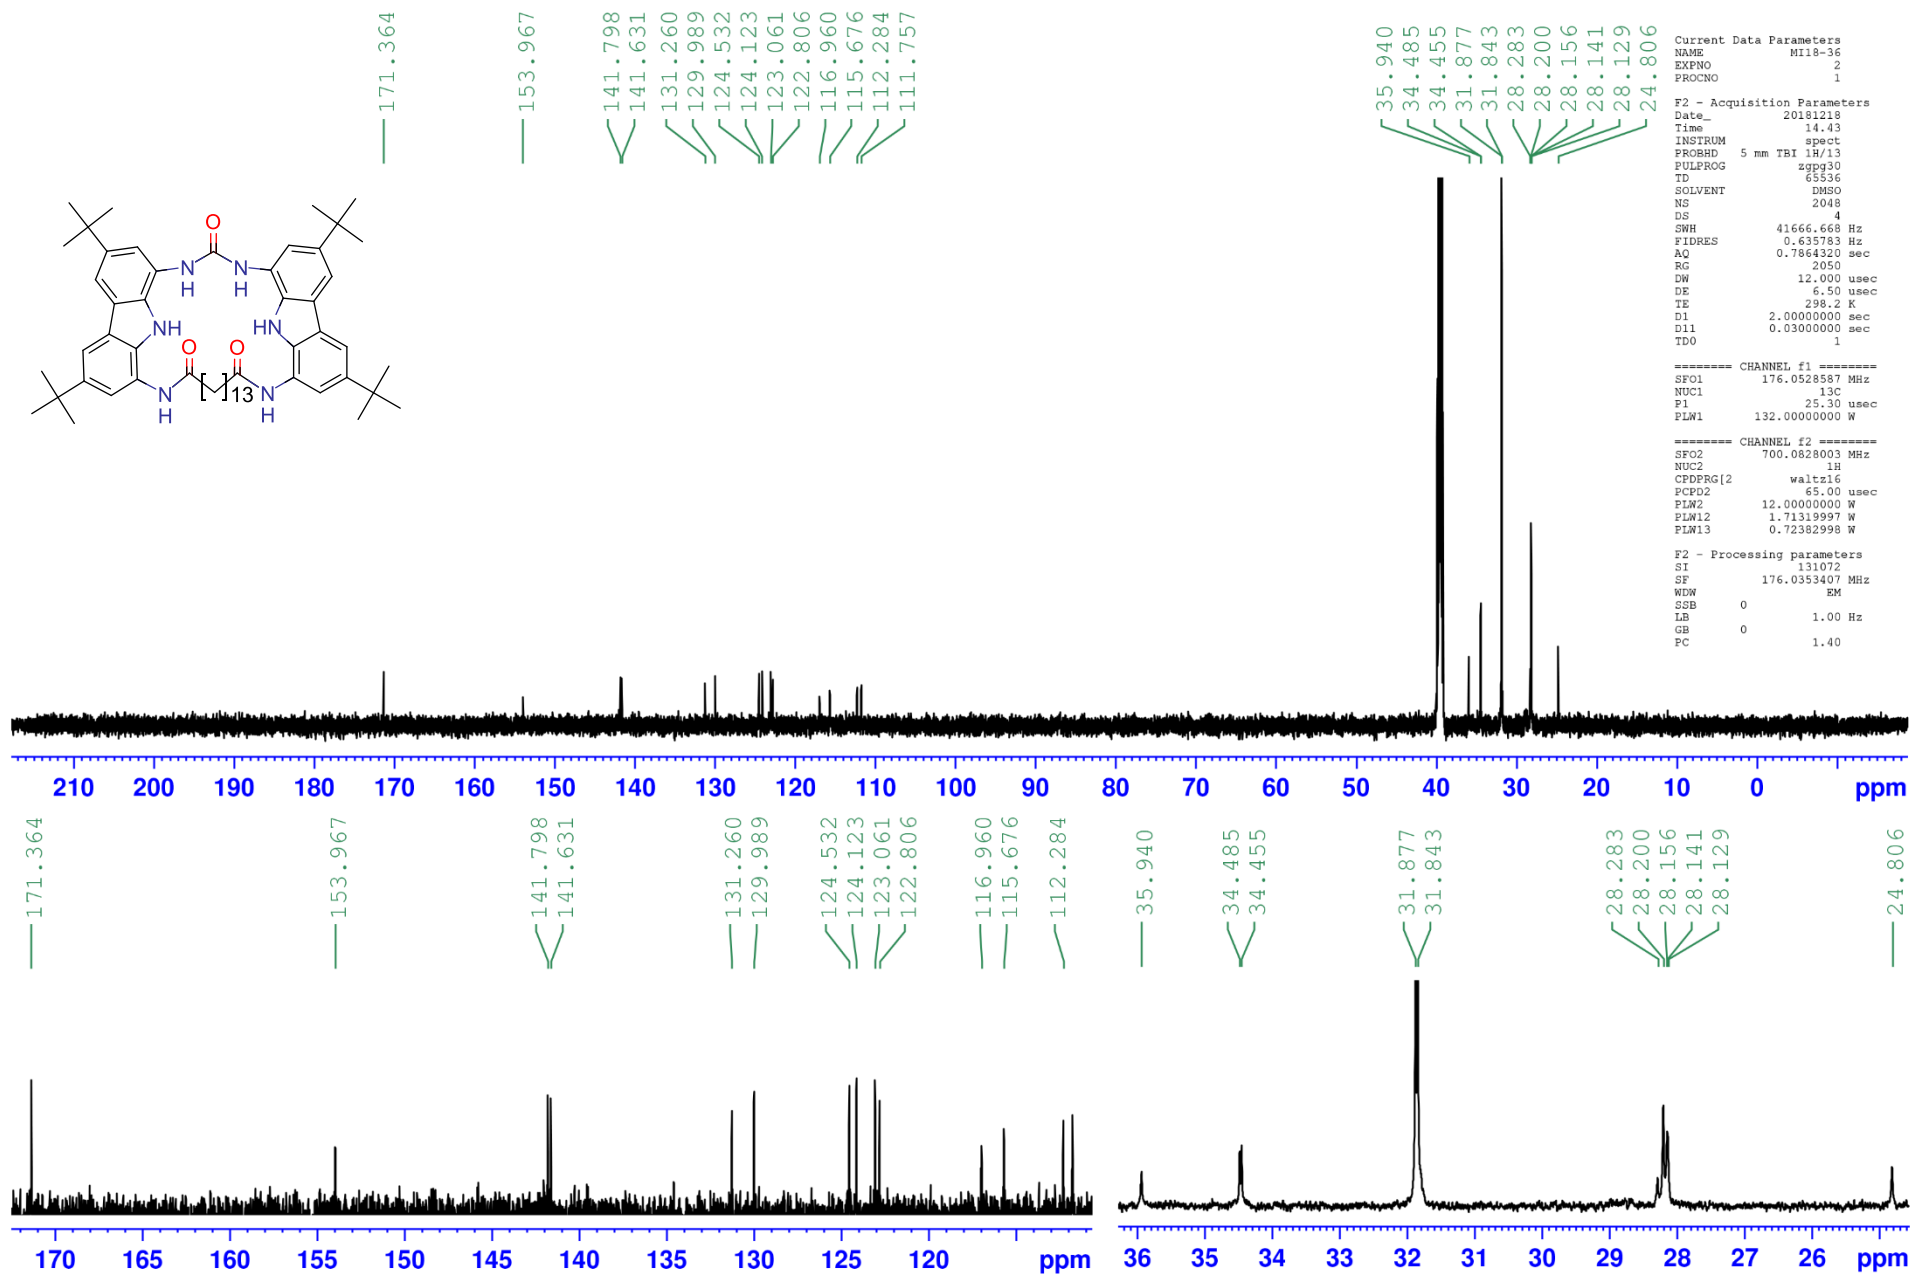

$^1\text{H}$ - $^{13}\text{C}$  HSQC spectrum (700.1 MHz) of compound **MC013**

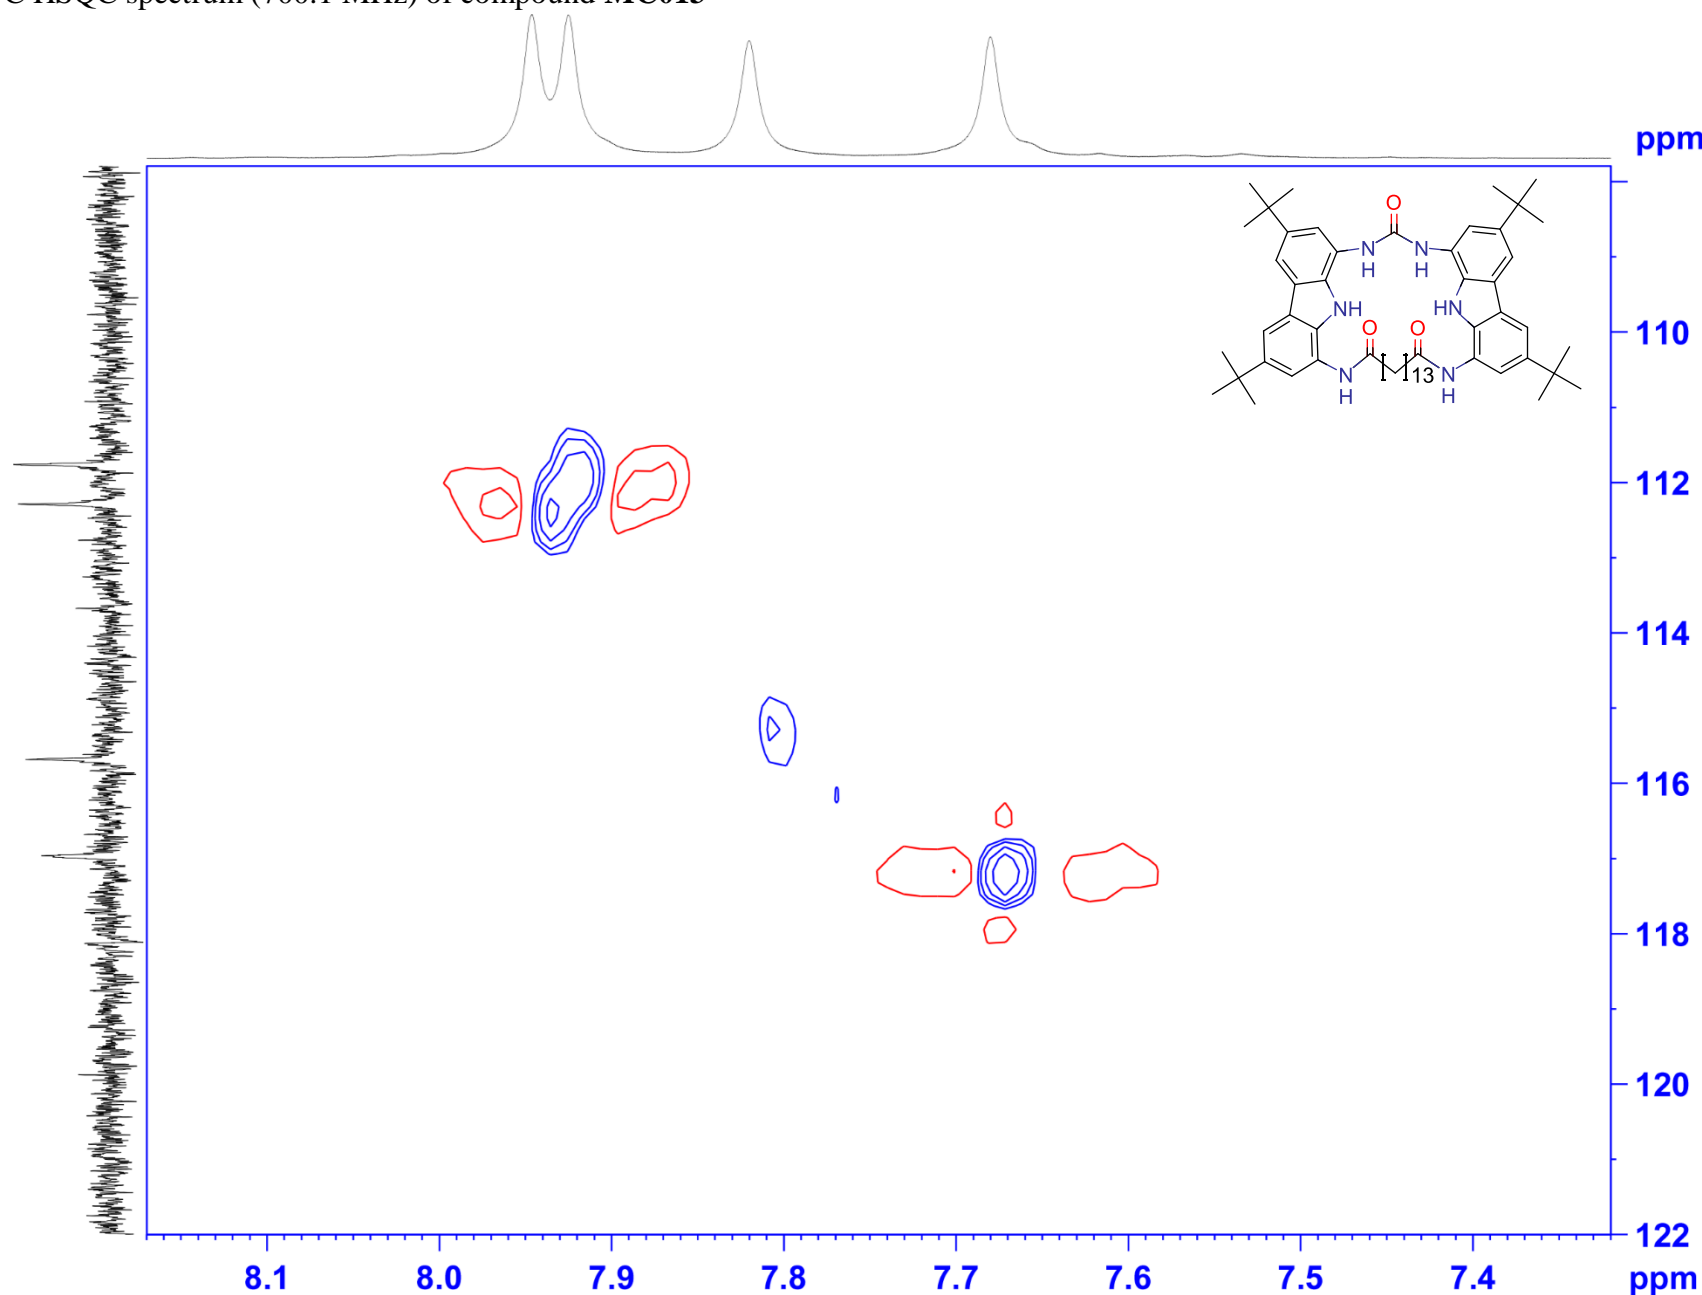

Current Data Parameters  
NAME MI18-36  
EXPNO 3  
PROCNO 1

F2 - Acquisition Parameters  
Date\_ 20181218  
Time 16.22  
INSTRUM spect  
PROBHD 5 mm TBI 1H/13  
PULPROG haqcddetgpgasp2.3  
TD 1398  
SOLVENT DMSO  
NS 4  
DS 32  
SWH 7002.801 Hz  
FIDRES 5.009157 Hz  
AQ 0.0998172 sec  
RG 2050  
DW 71.400 usec  
DE 6.50 usec  
TE 298.4 K  
CNST2 145.0000000  
CNST17 -0.5000000  
DO 0.00000300 sec  
D1 2.00000000 sec  
D4 0.00172414 sec  
D11 0.03000000 sec  
D16 0.00020000 sec  
D21 0.00360000 sec  
D24 0.00089000 sec  
IN0 0.00001780 sec

===== CHANNEL f1 =====  
SFO1 700.0838504 MHz  
NUC1 1H  
P1 11.50 usec  
P2 23.00 usec  
P28 1000.00 usec  
PLW1 12.00000000 W

===== CHANNEL f2 =====  
SFO2 176.0525075 MHz  
NUC2 13C  
CPDPRG2 bi\_p5m4sp\_4sp.2  
P3 25.30 usec  
P14 500.00 usec  
P24 2000.00 usec  
P31 1600.00 usec  
P63 1500.00 usec  
PLW0 0 W  
PLW2 132.00000000 W  
PLW12 27.93099976 W  
SFOAM[3] Crp60,0.5,20.1  
SFOAL3 0.500  
SPOFFS3 0 Hz  
SPW3 129.08999634 W  
SFOAM[7] Crp60comp.4  
SFOAL7 0.500  
SPOFFS7 0 Hz  
SPW7 129.08999634 W  
SFOAM[14] Crp42,1.5,20.2  
SFOAL14 0.500  
SPOFFS14 0 Hz  
SPW14 72.29299927 W  
SFOAM[18] Crp60\_xfilt.2  
SFOAL18 0.500  
SPOFFS18 0 Hz  
SPW18 43.61999893 W  
SFOAM[31] Crp42,1.5,20.2  
SFOAL31 0.500  
SPOFFS31 0 Hz  
SPW31 18.07299995 W

===== GRADIENT CHANNEL =====  
GFOAM[1] SMSQ10.100  
GFOAM[2] SMSQ10.100  
GFOAM[3] SMSQ10.100  
GFOAM[4] SMSQ10.100  
GFZ1 80.00 %  
GFZ2 20.10 %  
GFZ3 11.00 %  
GFZ4 -5.00 %  
P16 1000.00 usec  
P19 600.00 usec

F1 - Acquisition parameters  
TD 256  
SFO1 176.0525 MHz  
FIDRES 219.452240 Hz  
SW 159.554 ppm  
FMODE Echo-Antiecho

F2 - Processing parameters  
SI 1024  
SF 700.0800084 MHz  
WDW QSINE  
SSB 2  
LB 0 Hz  
GB 0  
PC 1.40

F1 - Processing parameters  
SI 1024  
MC2 echo-antiecho  
SF 176.0353407 MHz  
WDW QSINE  
SSB 2  
LB 0 Hz  
GB 0

$^1\text{H}$ - $^{13}\text{C}$  HMBC spectrum (700.1 MHz) of compound **MC013**

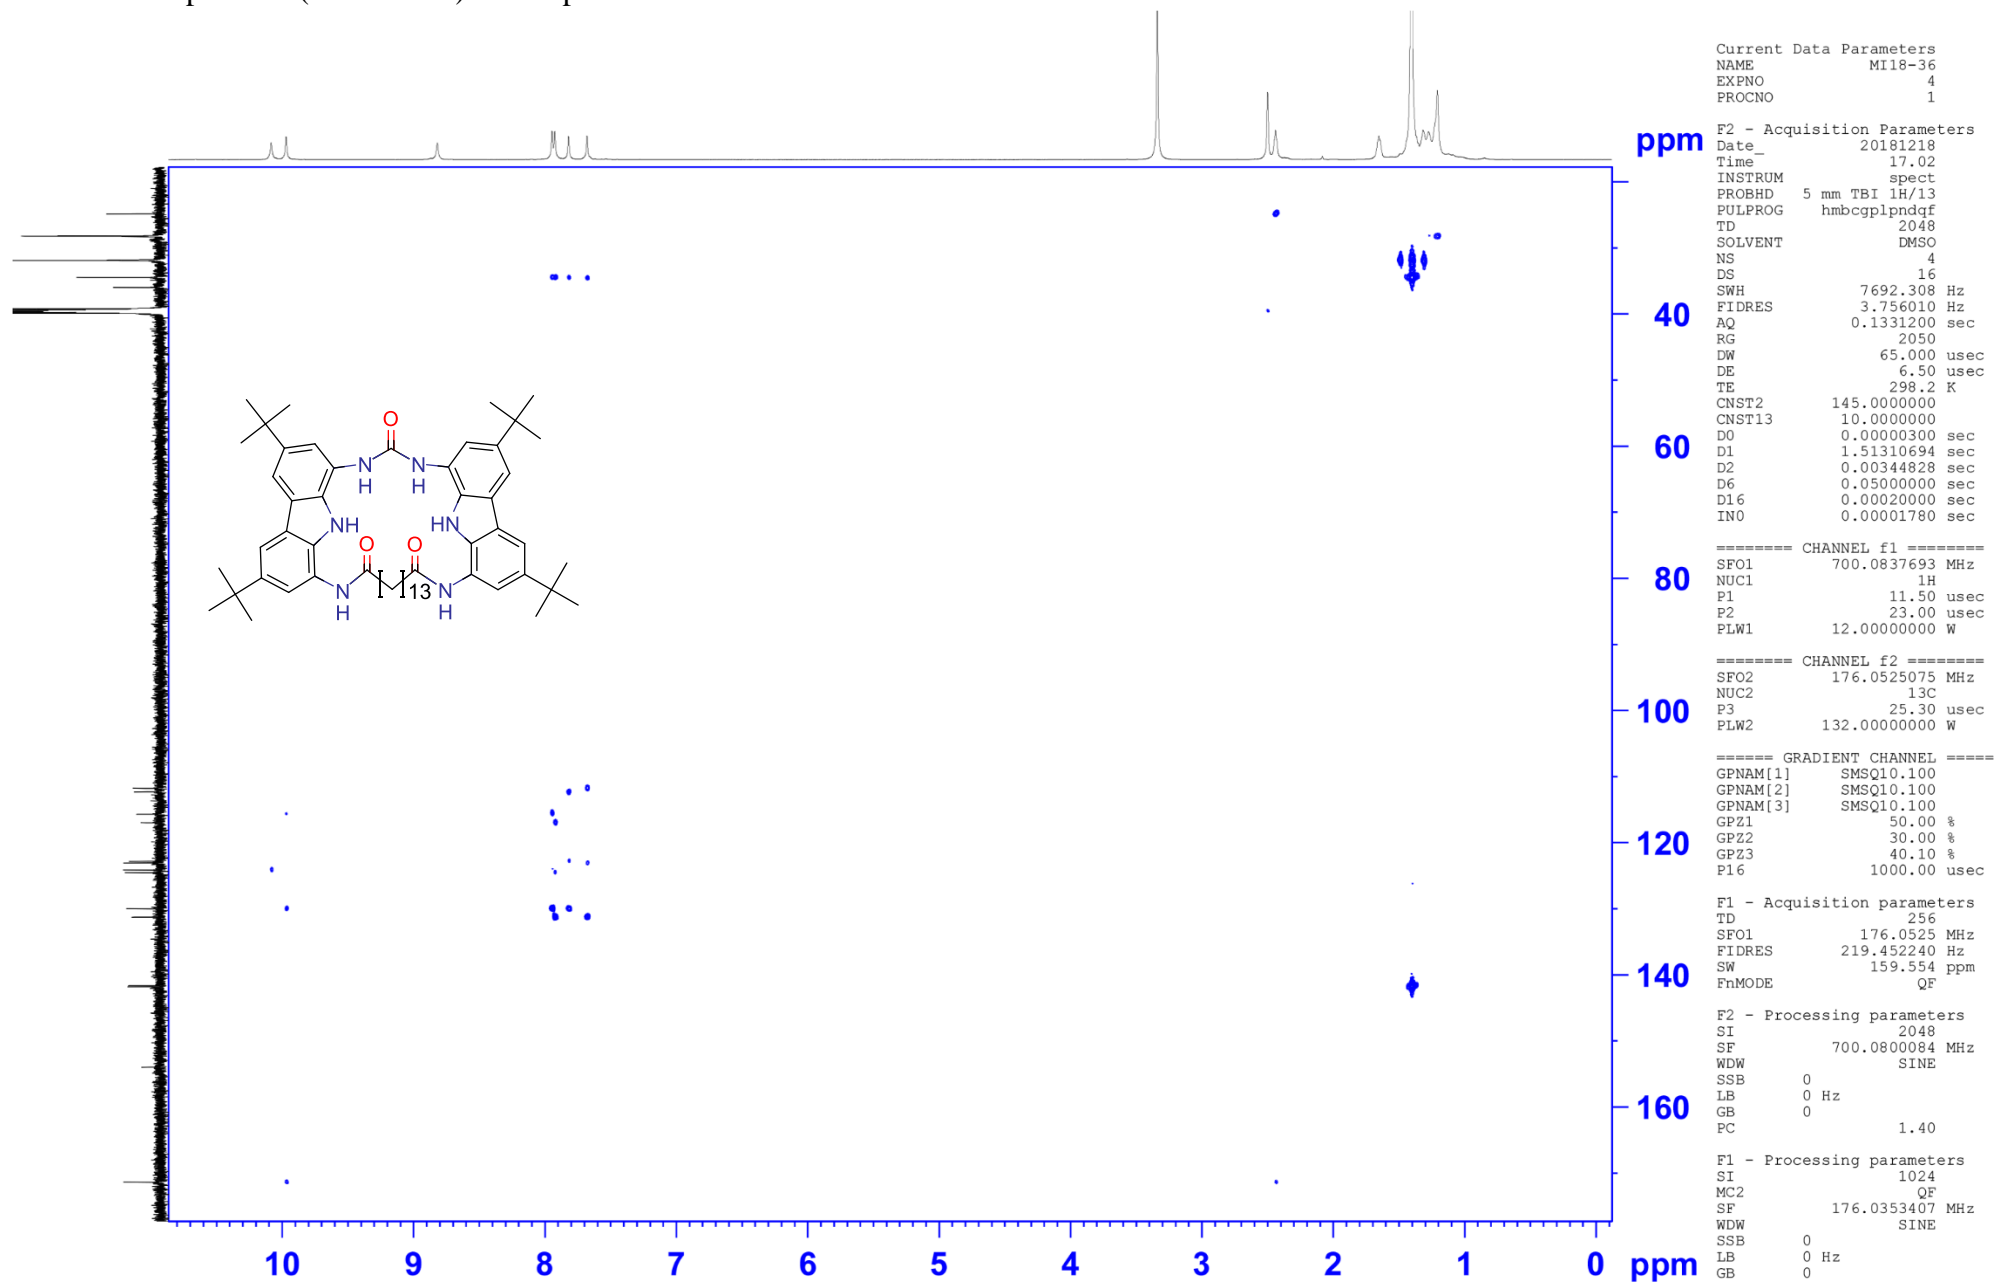

# HRMS spectrum of compound **MC013**

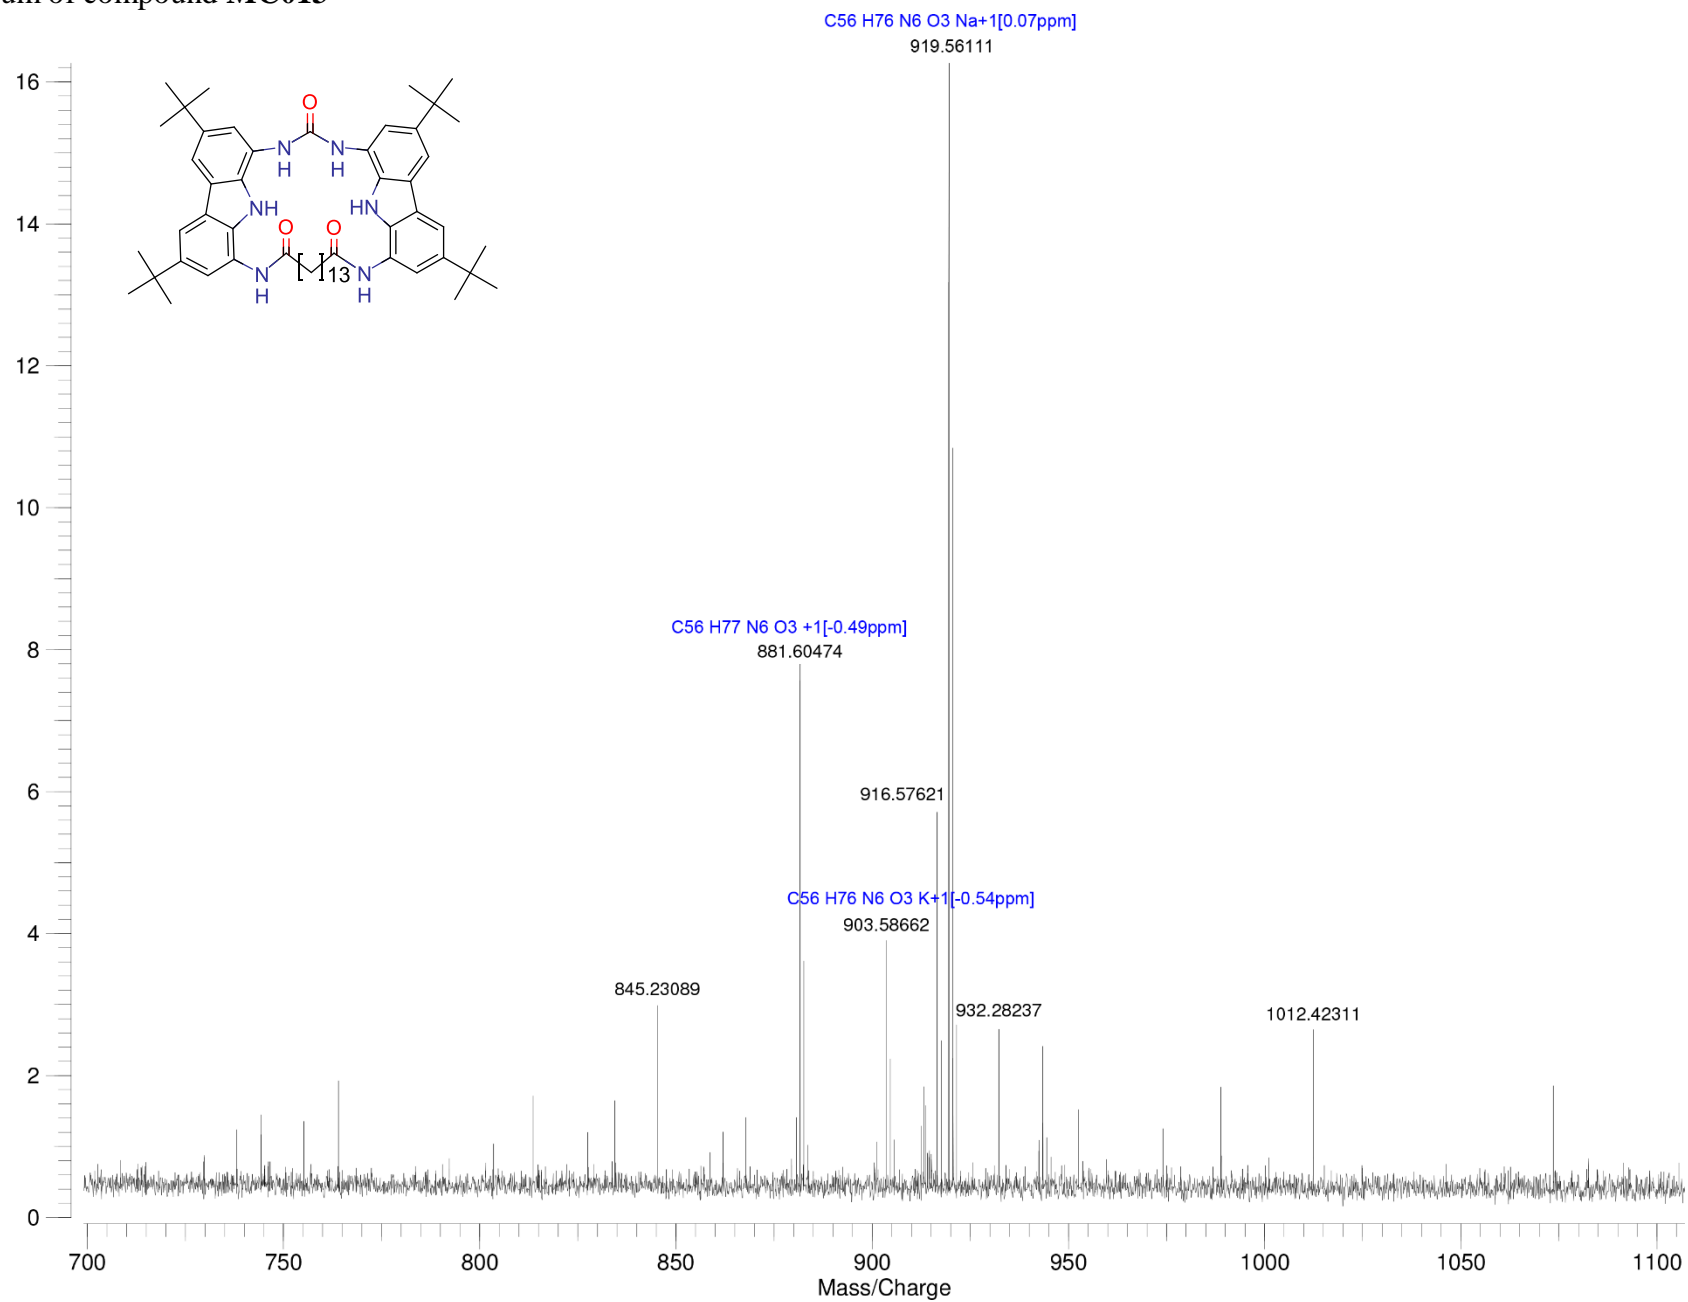

# <sup>1</sup>H NMR spectrum (700.1 MHz) of compound **MC014**

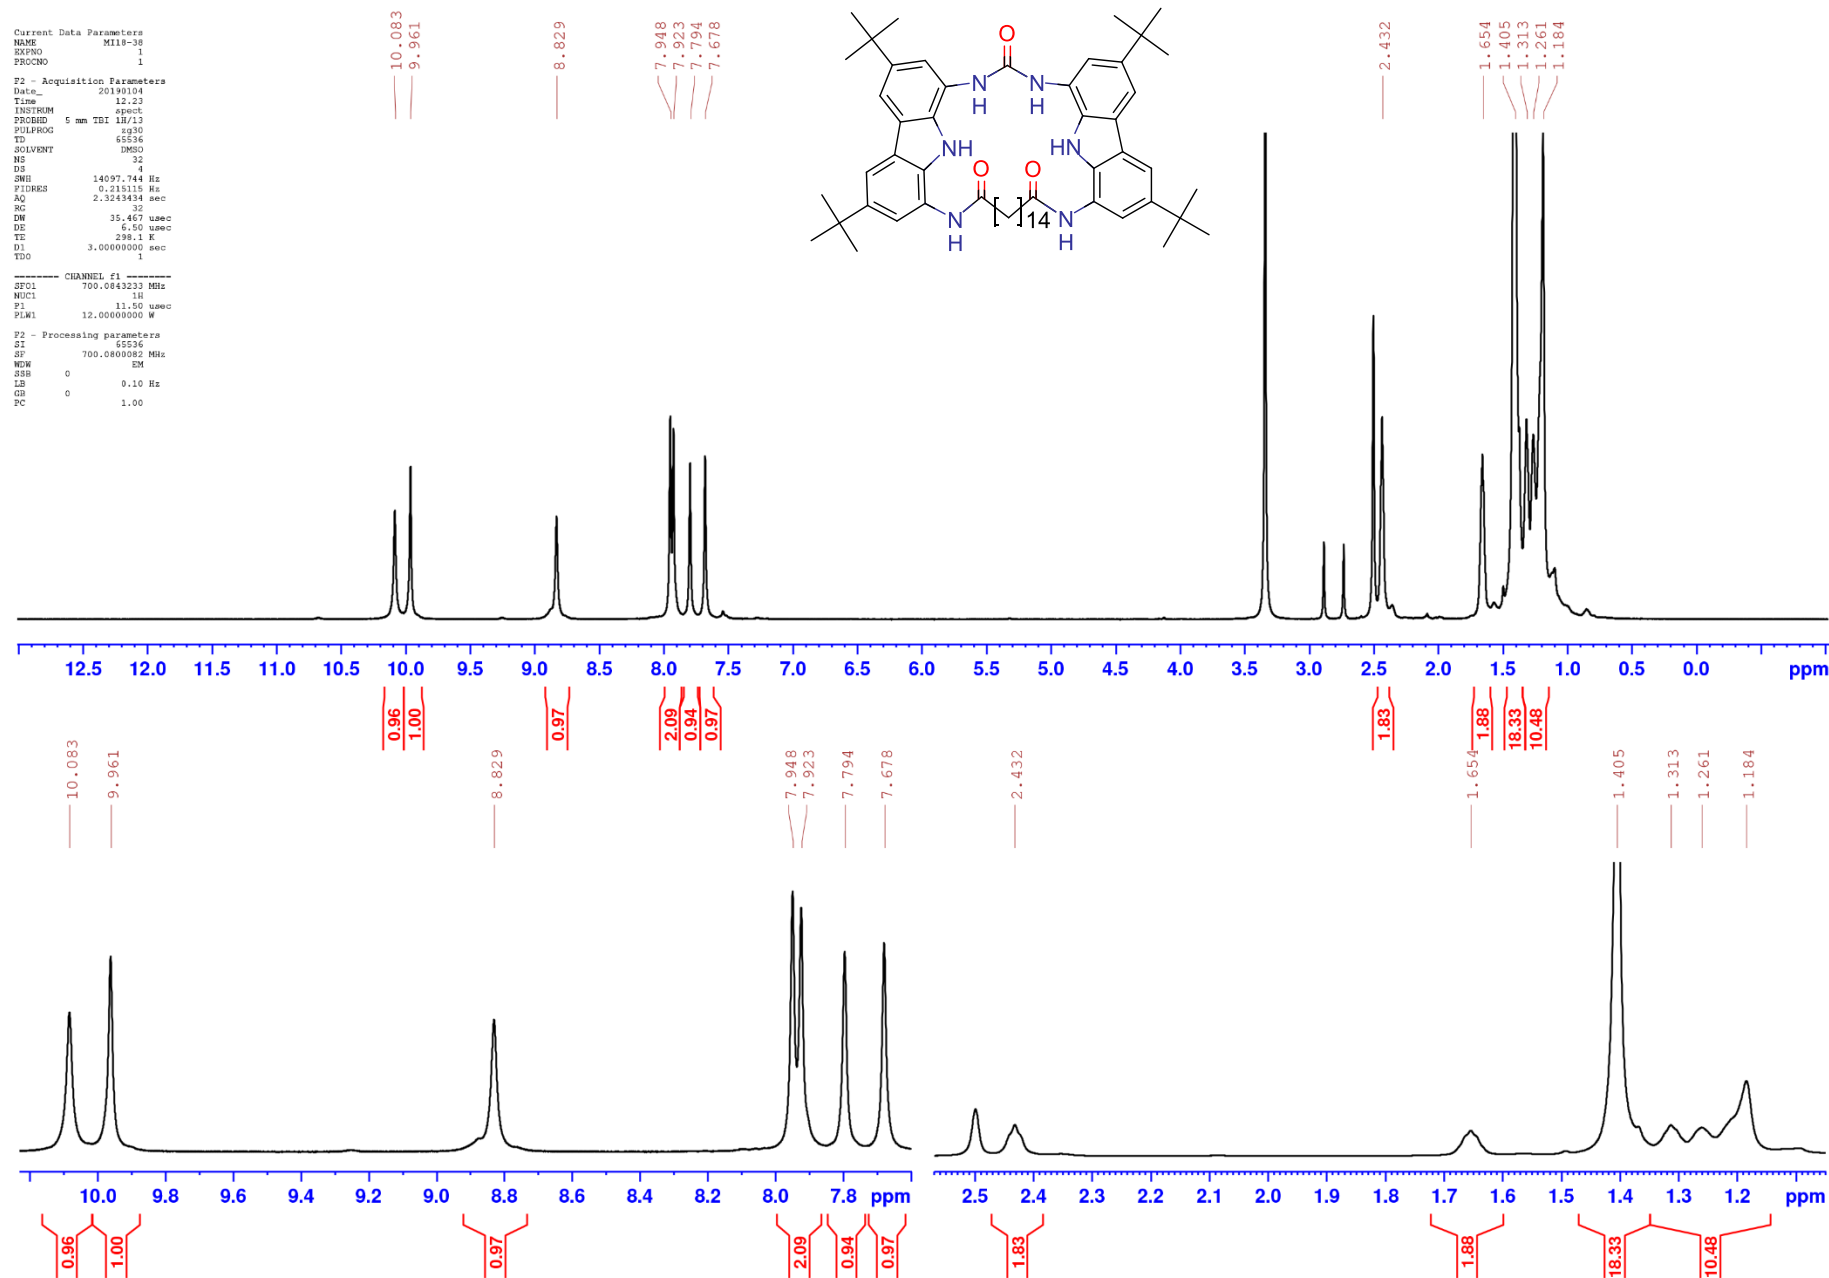

$^{13}\text{C}$  NMR spectrum (700.1 MHz) of compound **MC014**

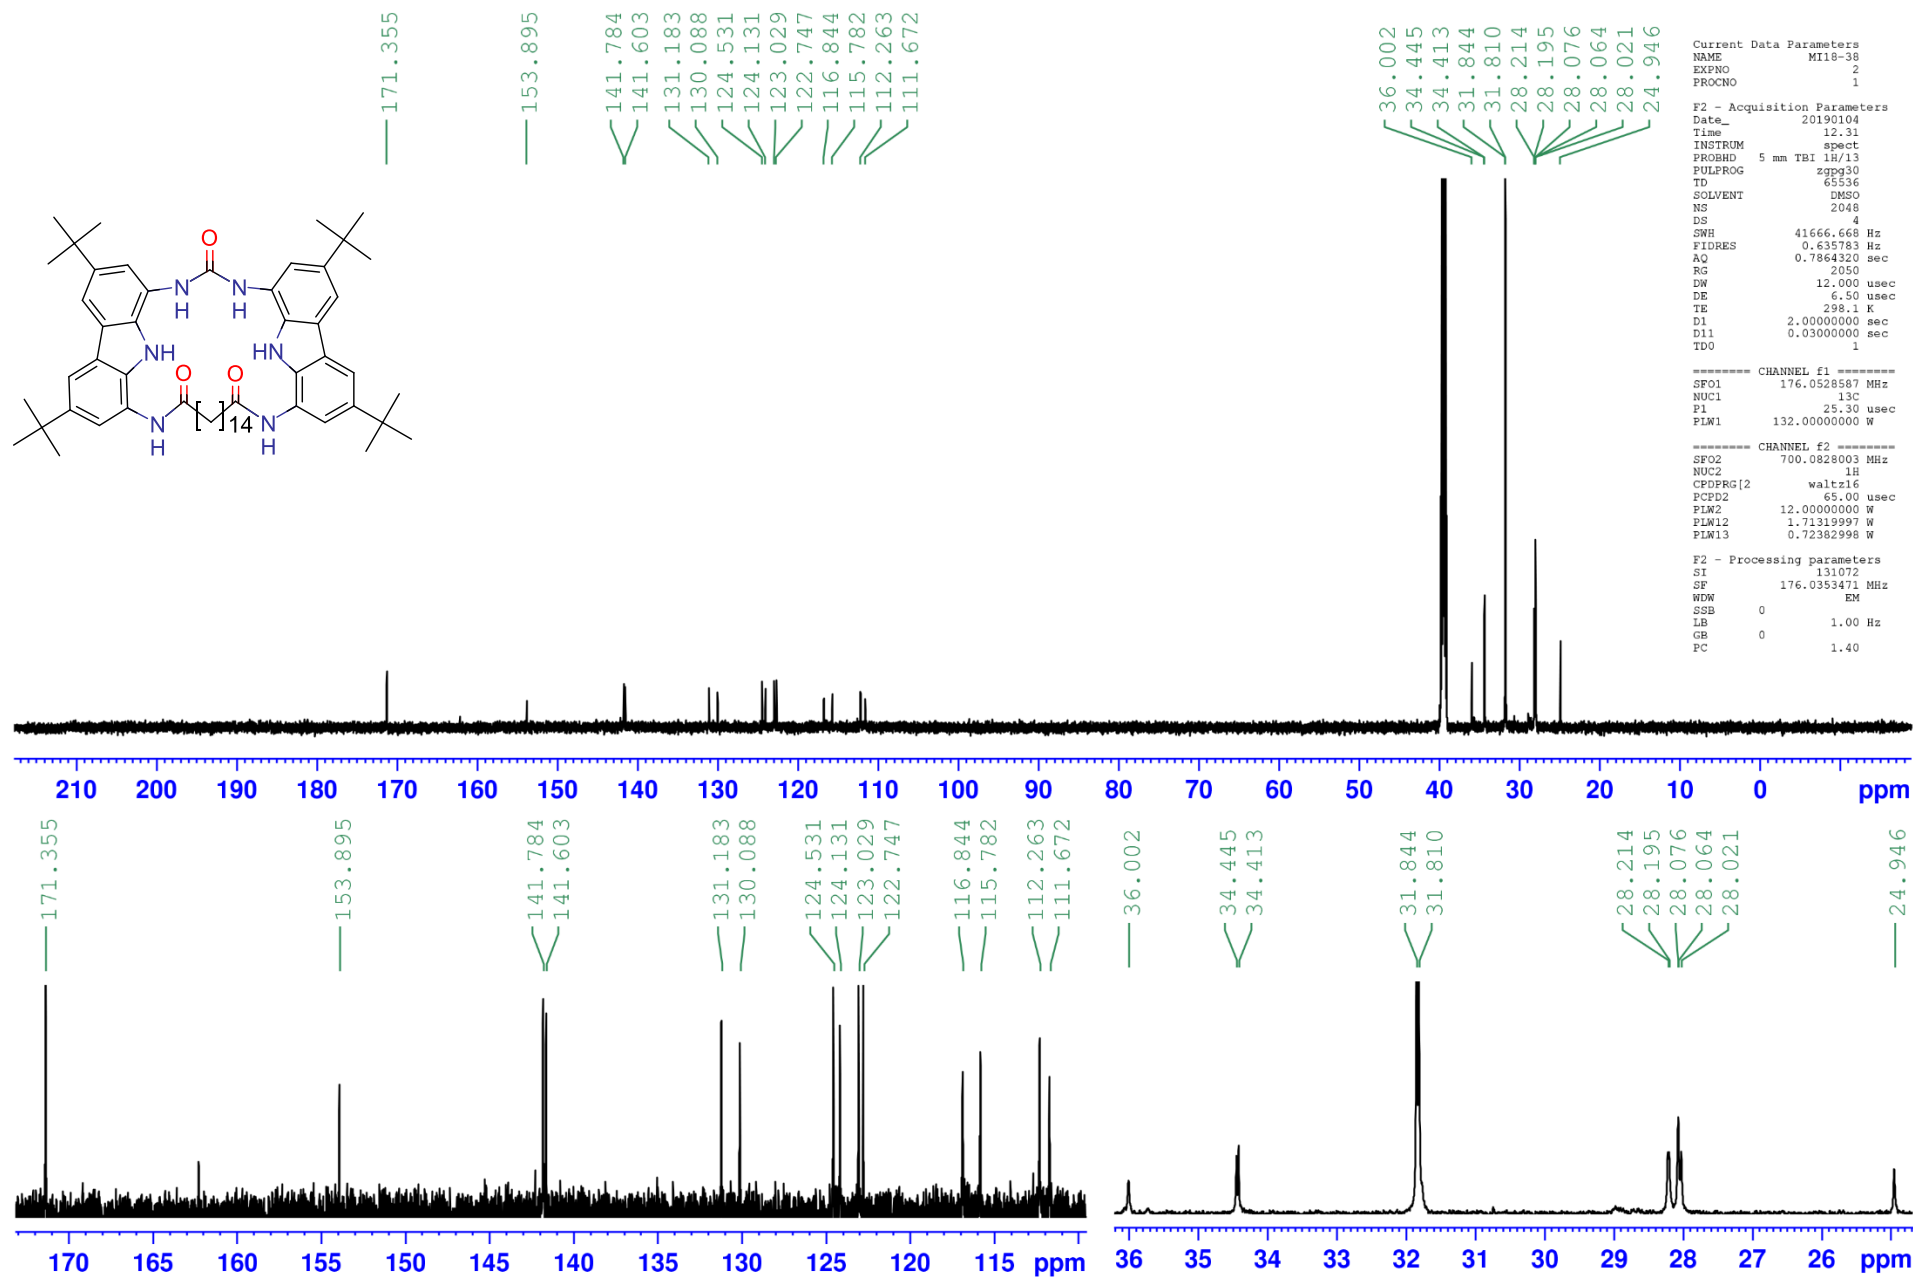

$^1\text{H}$ - $^{13}\text{C}$  HSQC spectrum (700.1 MHz) of compound **MC014**

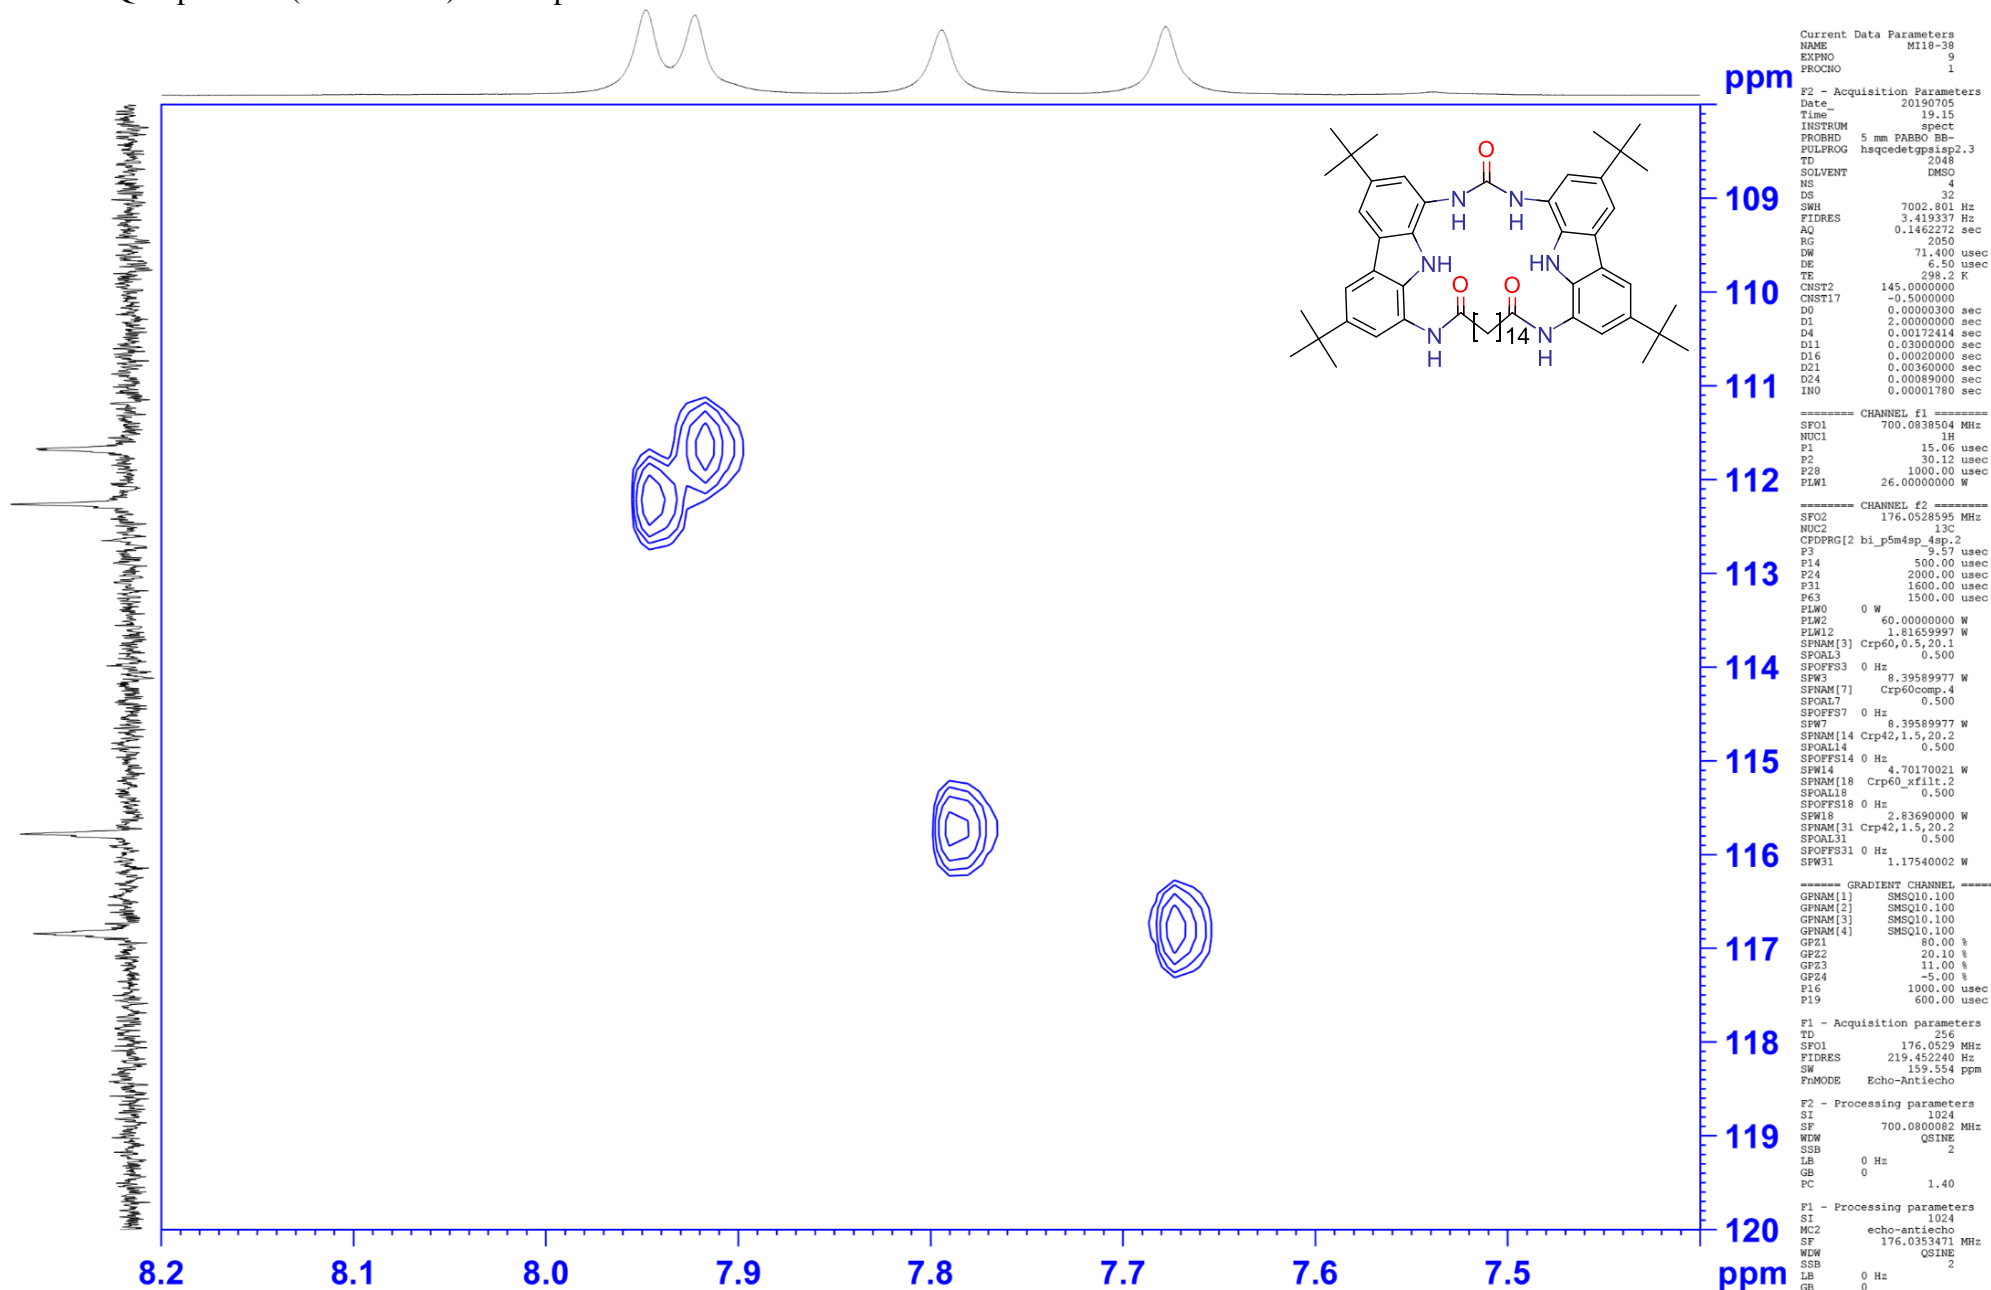

$^1\text{H}$ - $^{13}\text{C}$  HMBC spectrum (700.1 MHz) of compound **MC014**

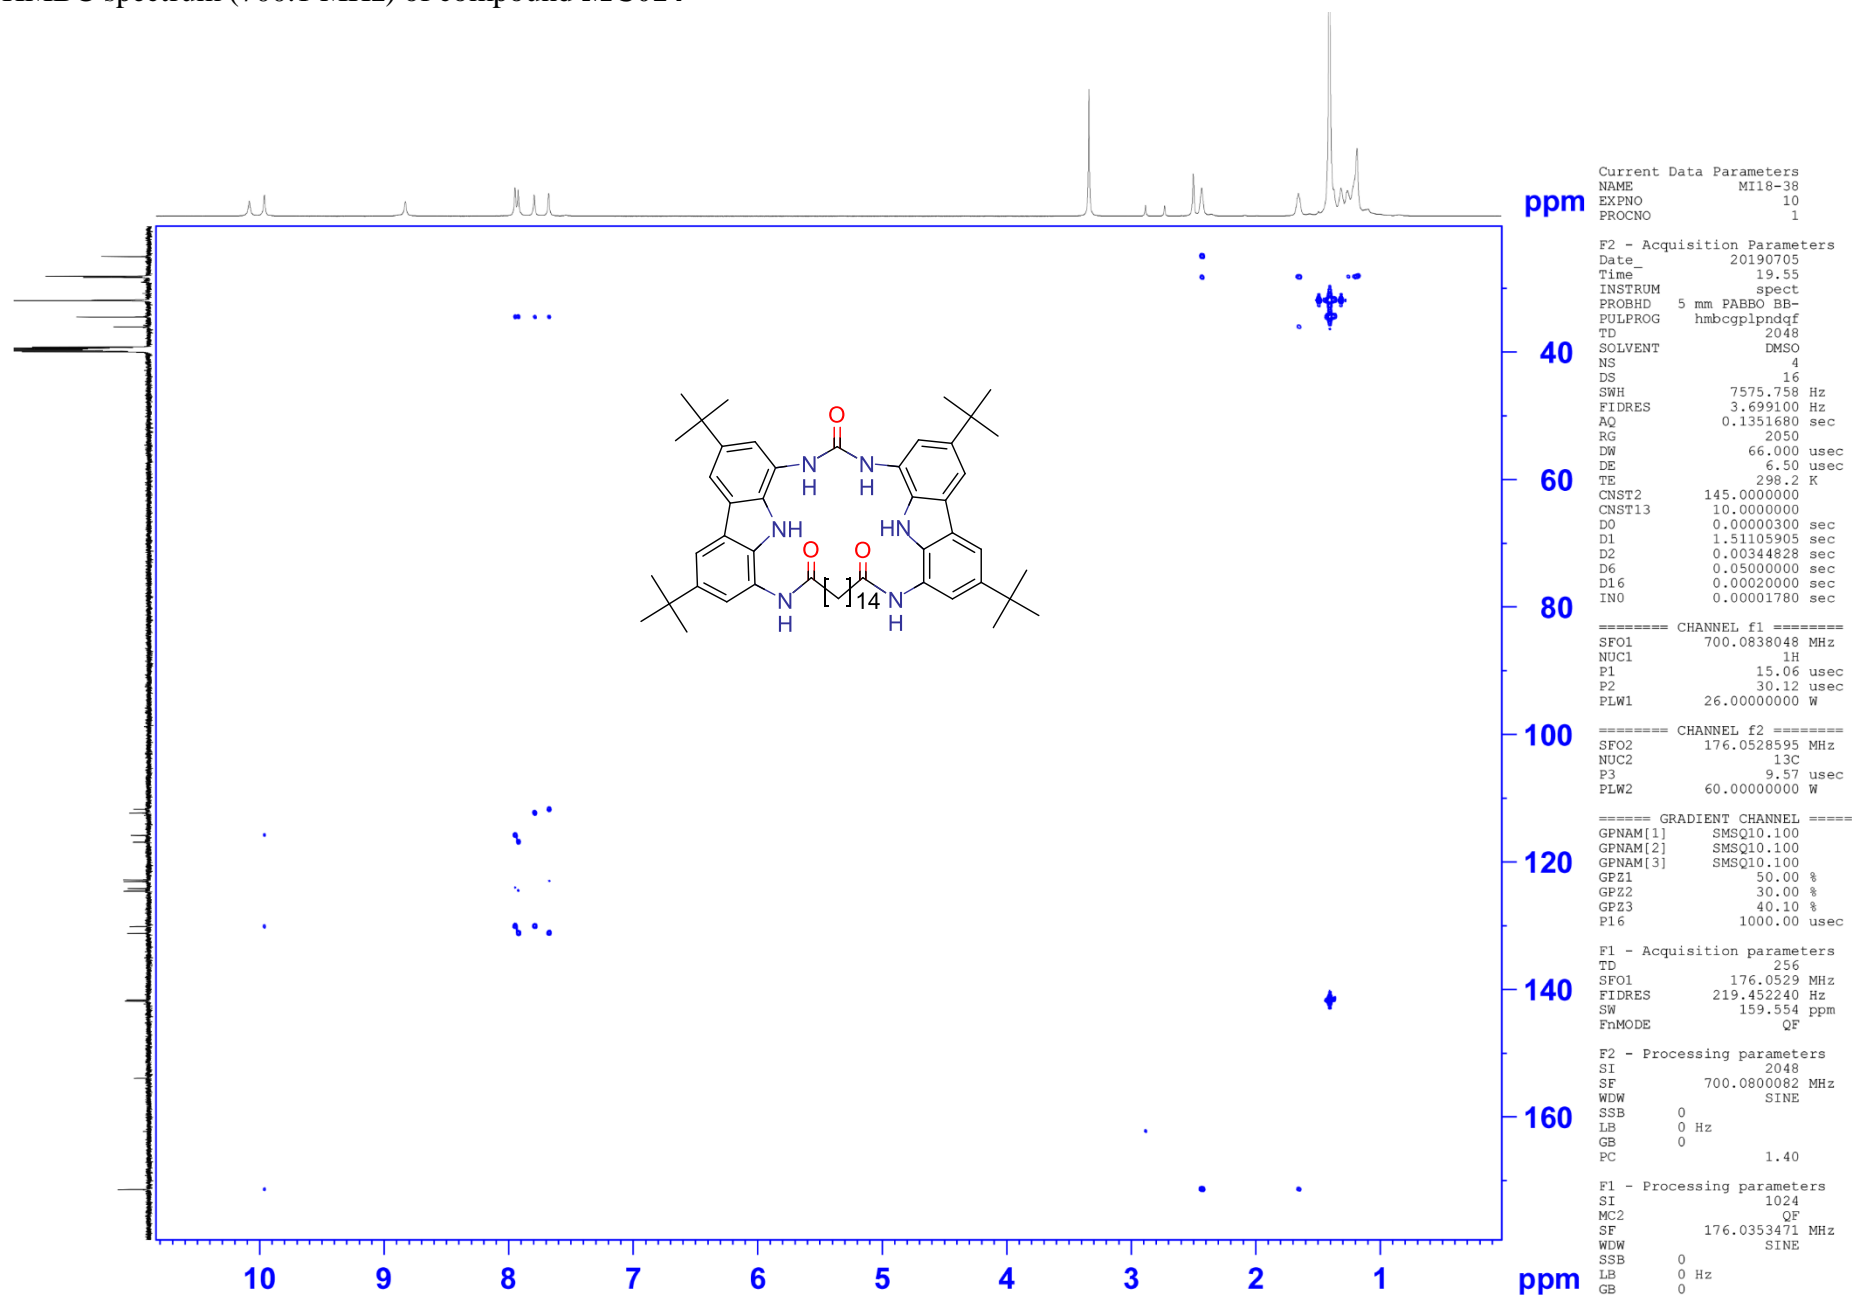



# HRMS spectrum of compound MC014

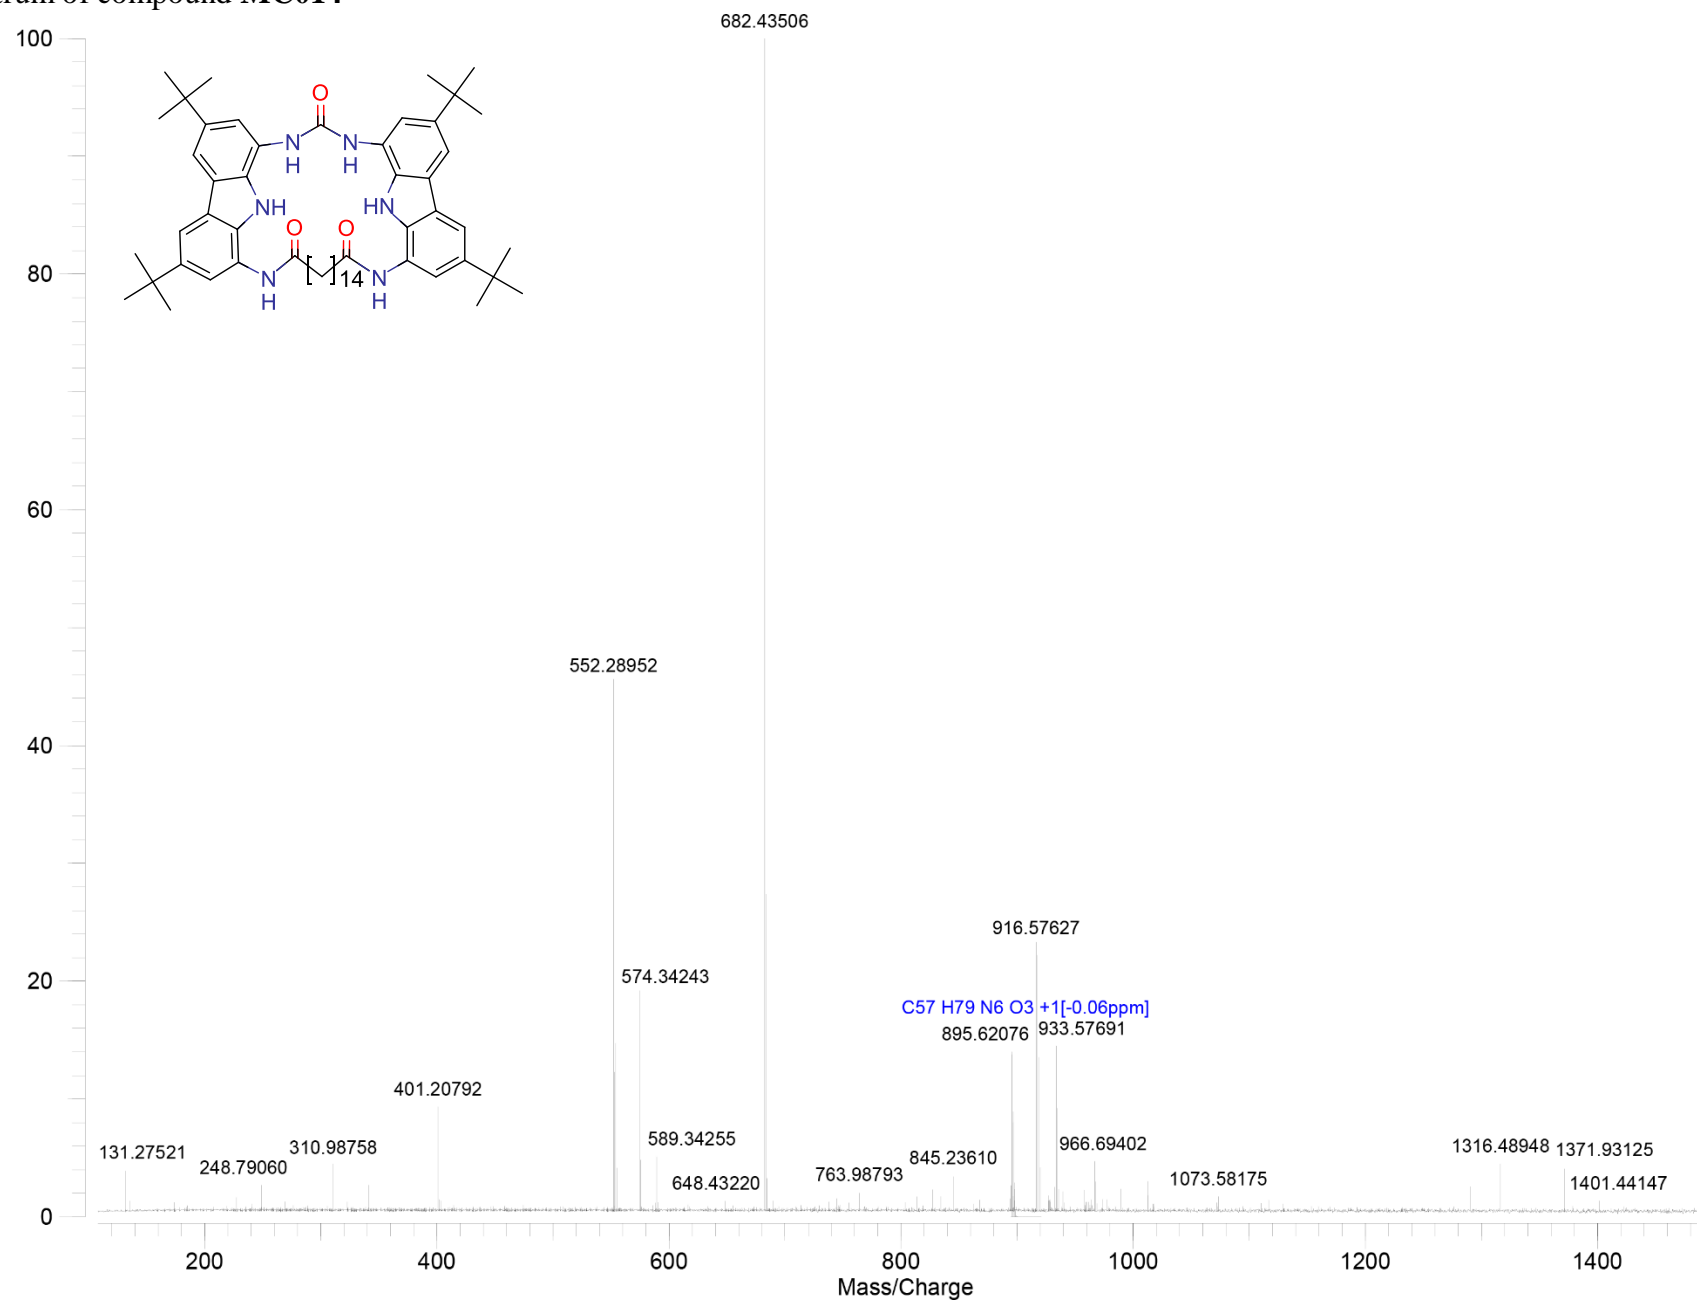

Stacked  $^1\text{H}$  NMR spectra (700.1 MHz) of a mixture of receptors **CZ016**; 1,3-diindolylurea; 1,3-dicarbazolylurea + TBA-acetate

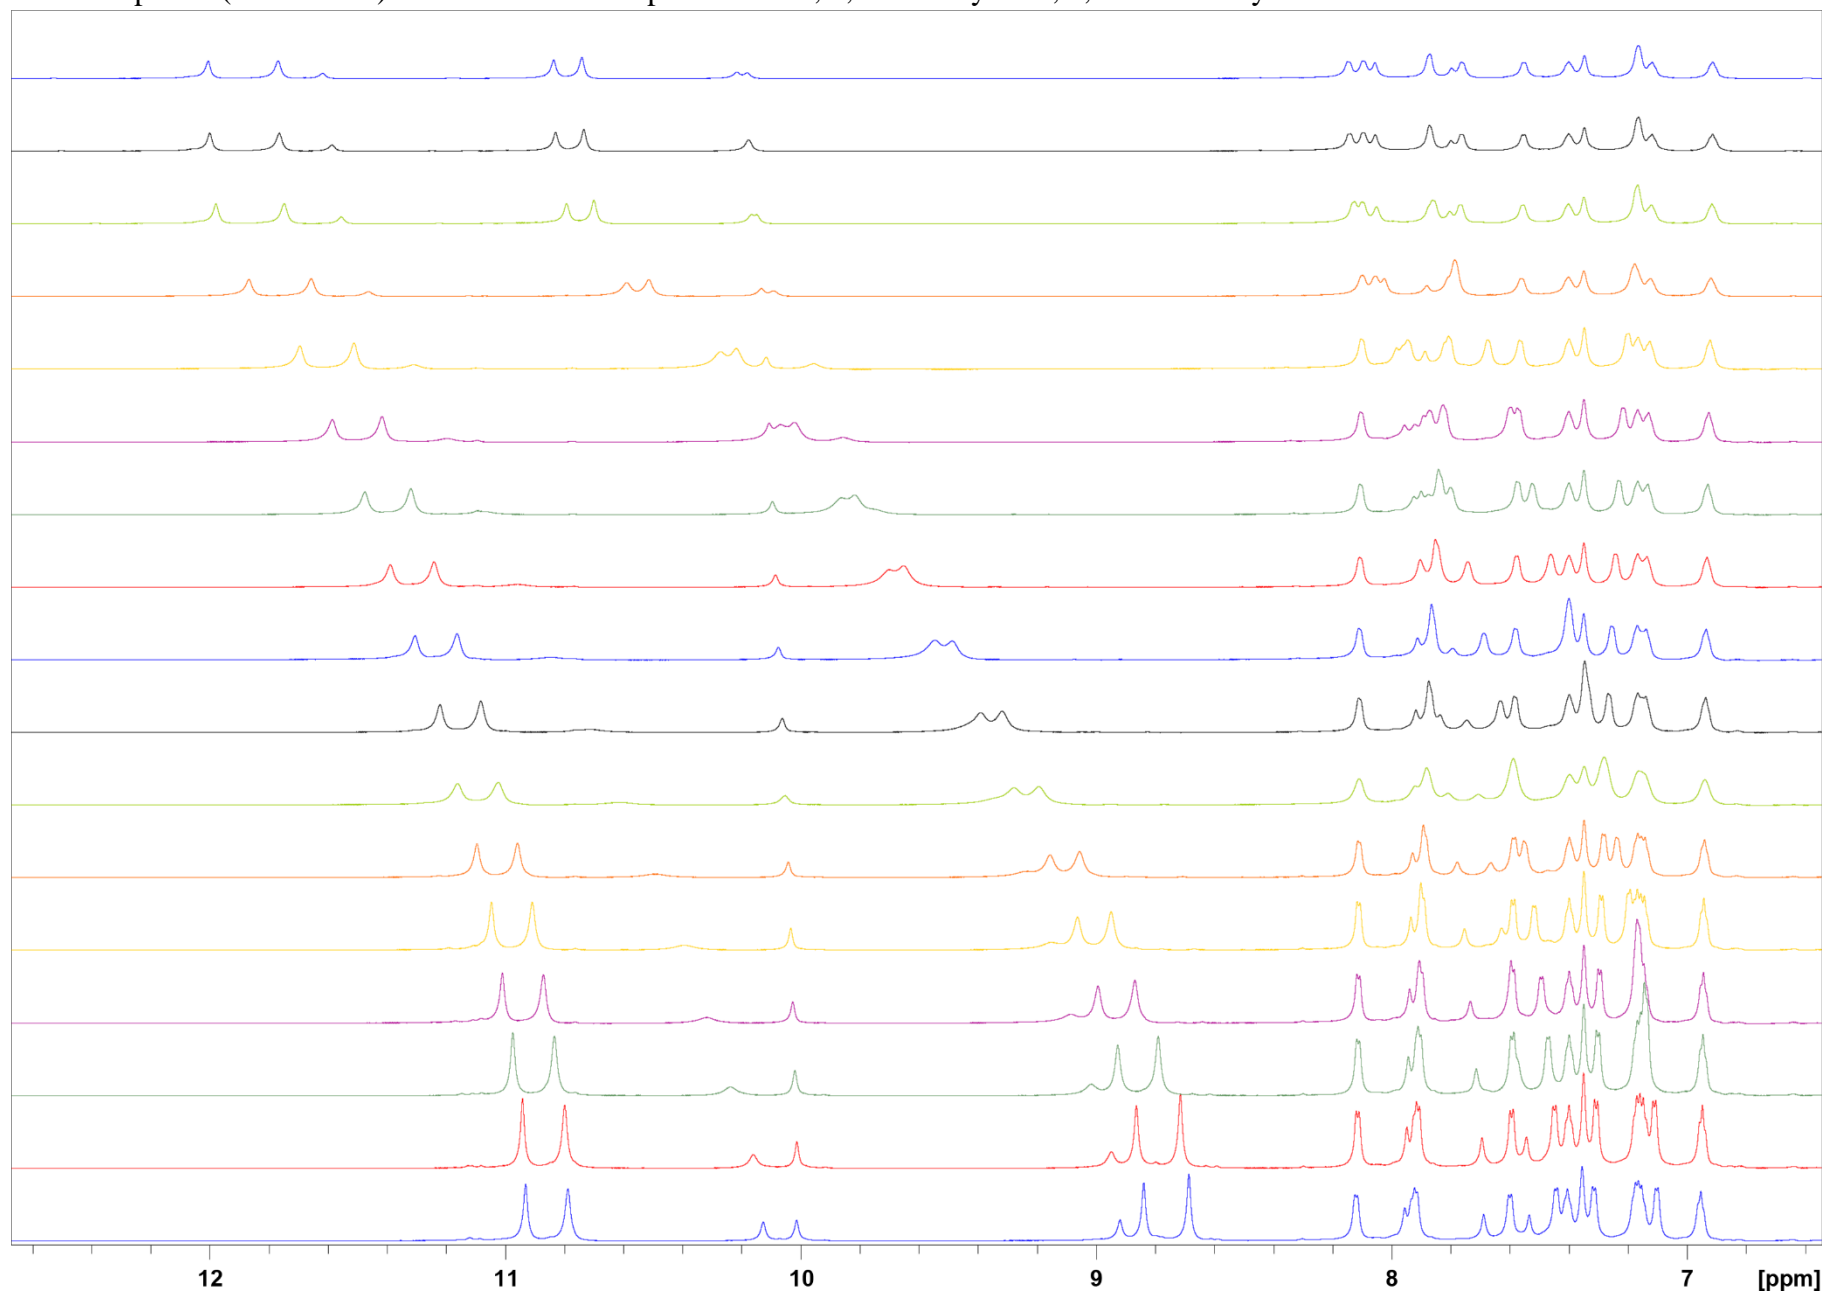

Stacked  $^1\text{H}$  NMR spectra (700.1 MHz) of a mixture of receptors **MC001**; 2,7-(COOBu) $_2$ -indolocarbazole; 2,9-(COOBu) $_2$ -indolocarbazole + TBA-acetate

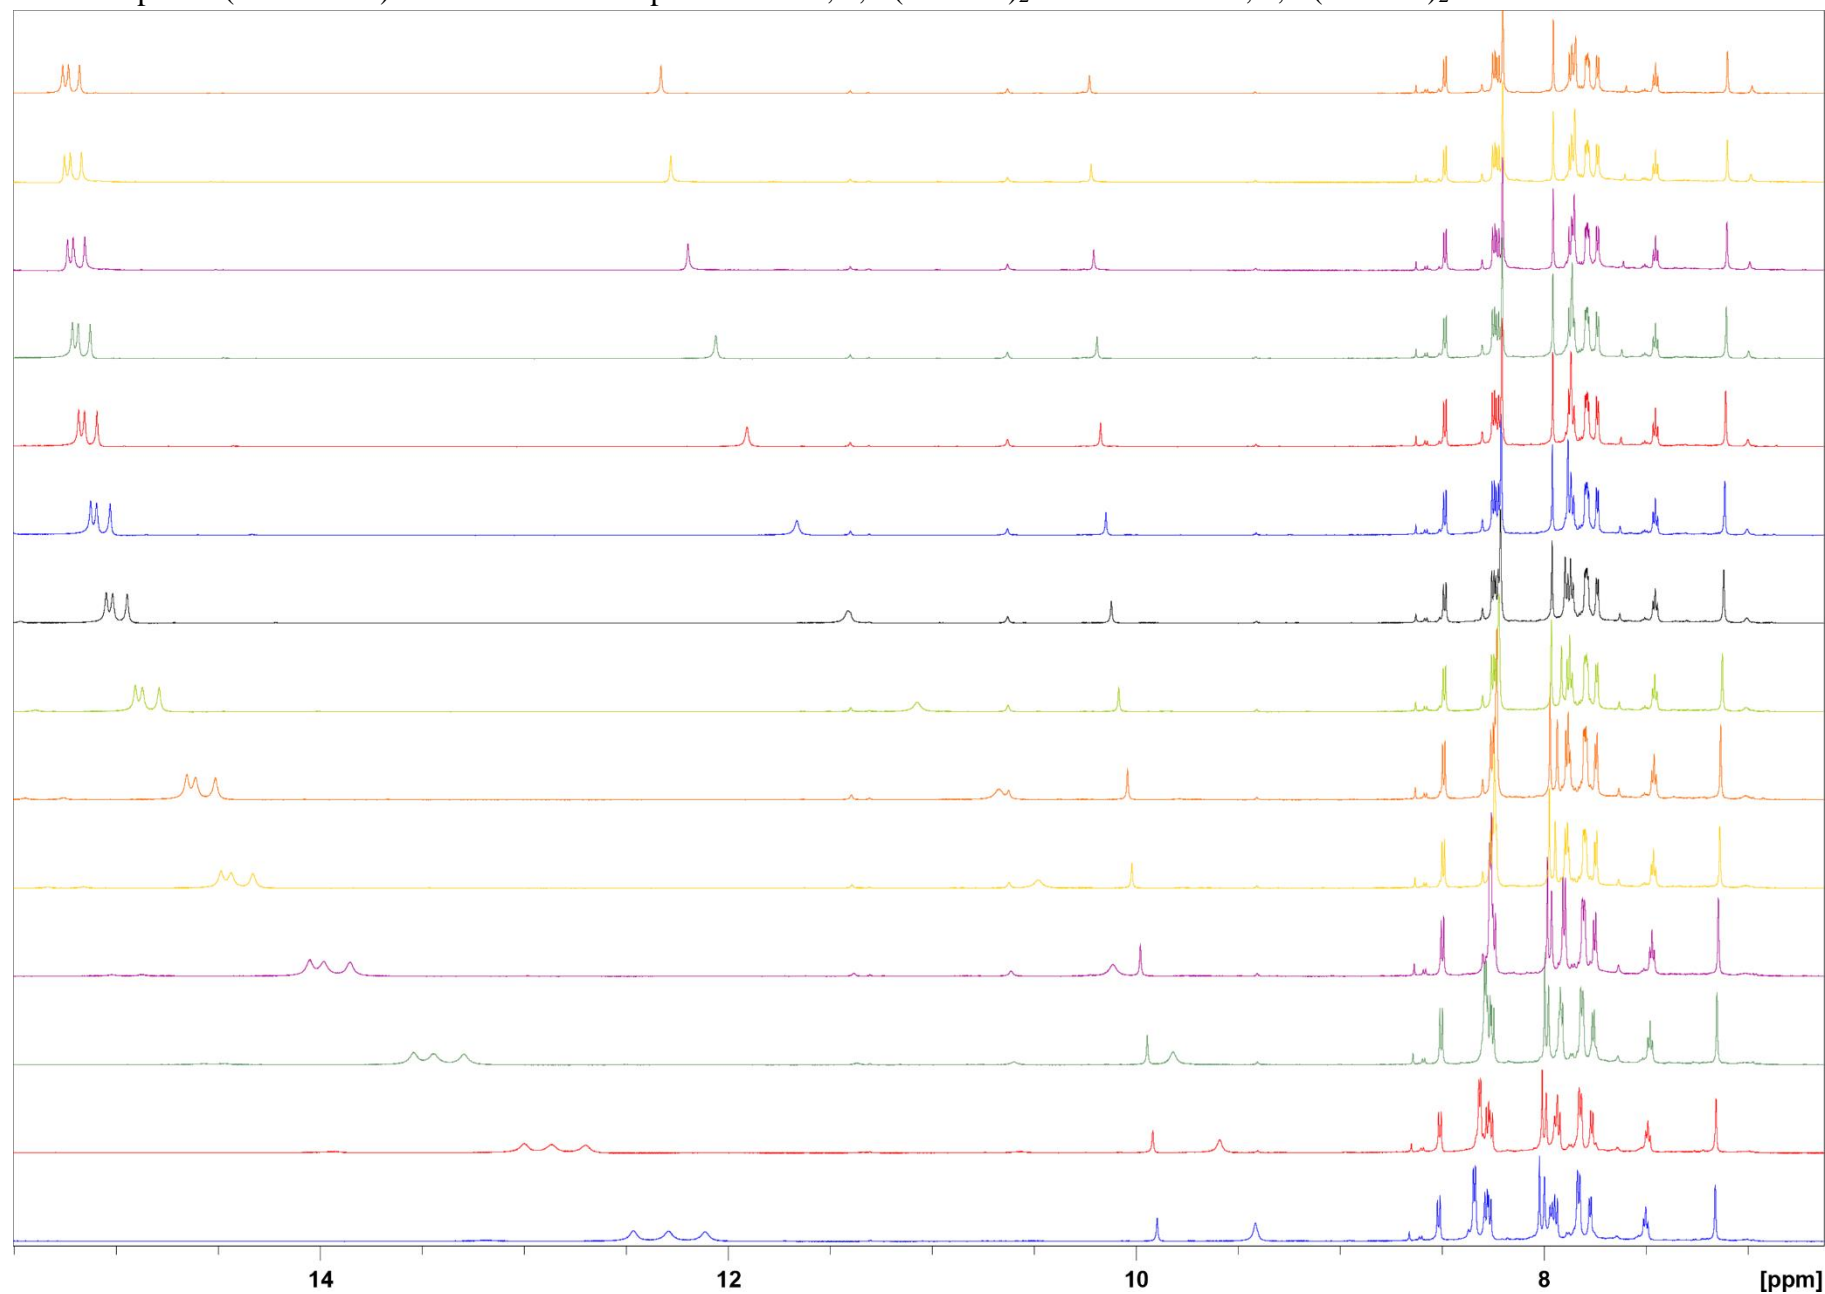

Stacked  $^1\text{H}$  NMR spectra (700.1 MHz) of a mixture of receptors **MC002**; indolocarbazole; 2,7-(Cl)<sub>2</sub>-indolocarbazole + TBA-acetate

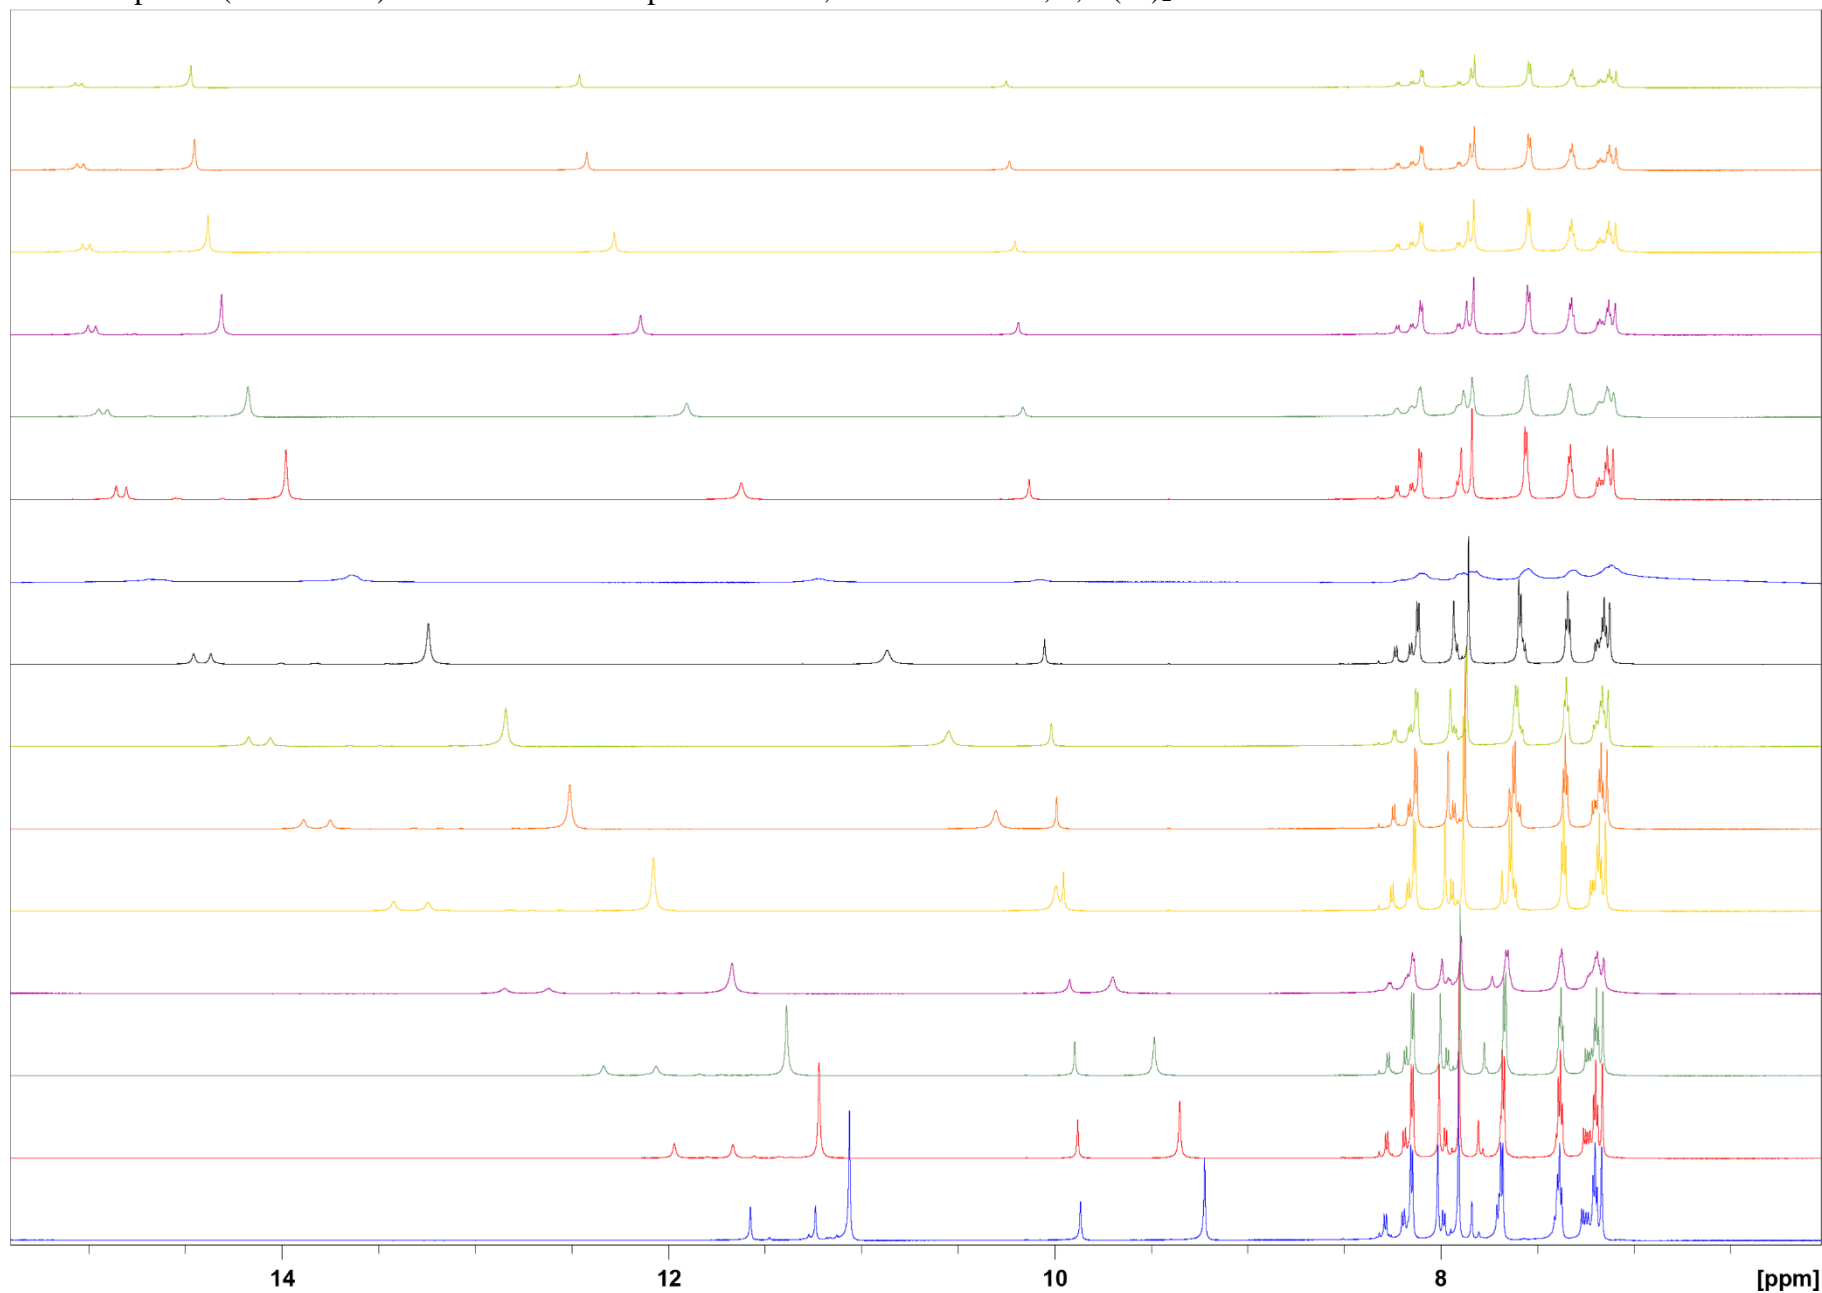

Stacked  $^1\text{H}$  NMR spectra (700.1 MHz) of a mixture of receptors **MC003**; 2,7-(COOBu) $_2$ -indolocarbazole; 2,9-(COOBu) $_2$ -indolocarbazole + TBA-acetate

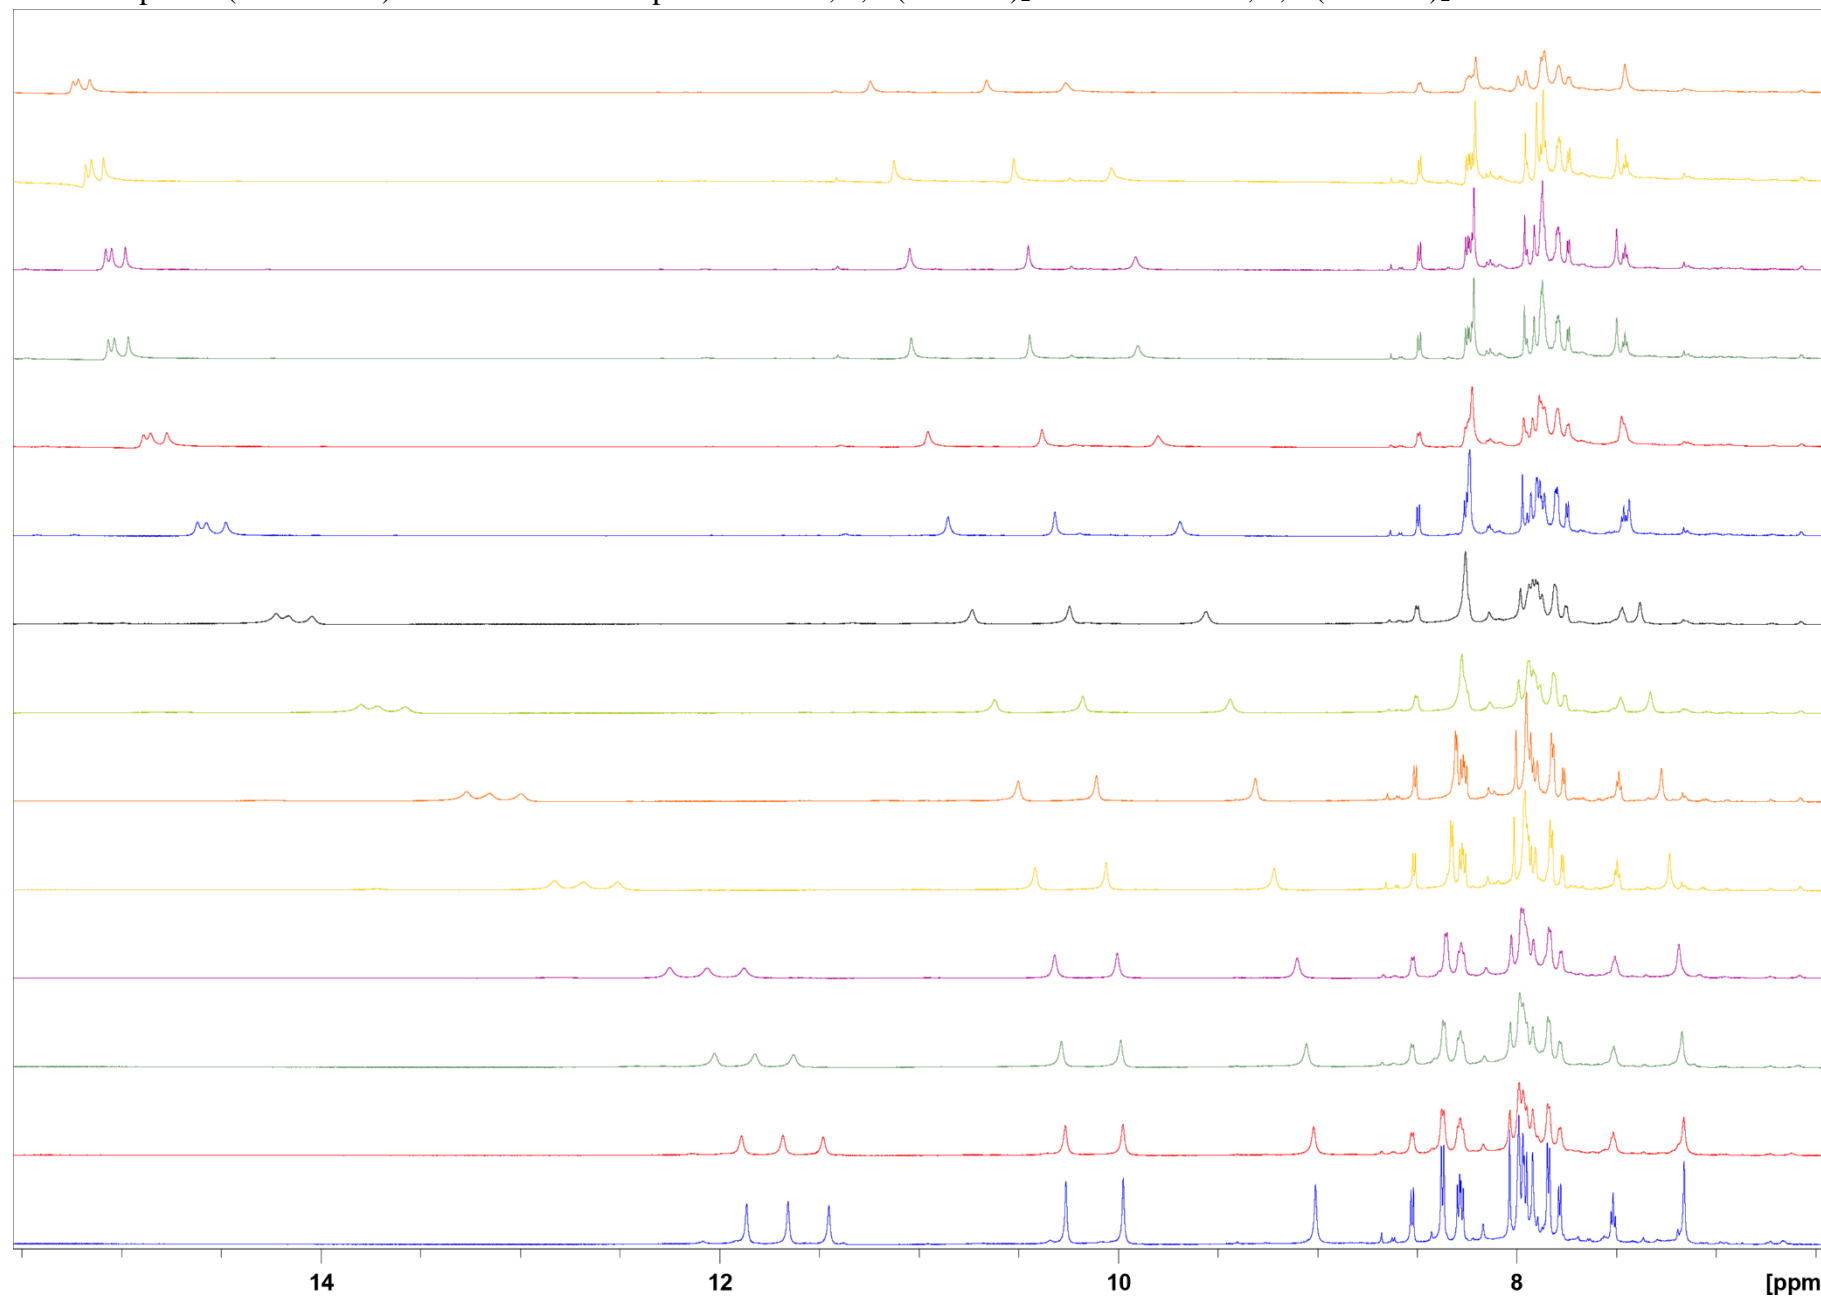

Stacked  $^1\text{H}$  NMR spectra (700.1 MHz) of a mixture of receptors **MC004**; 1,3-diindolylurea; 1,3-dicarbazolylurea + TBA-acetate

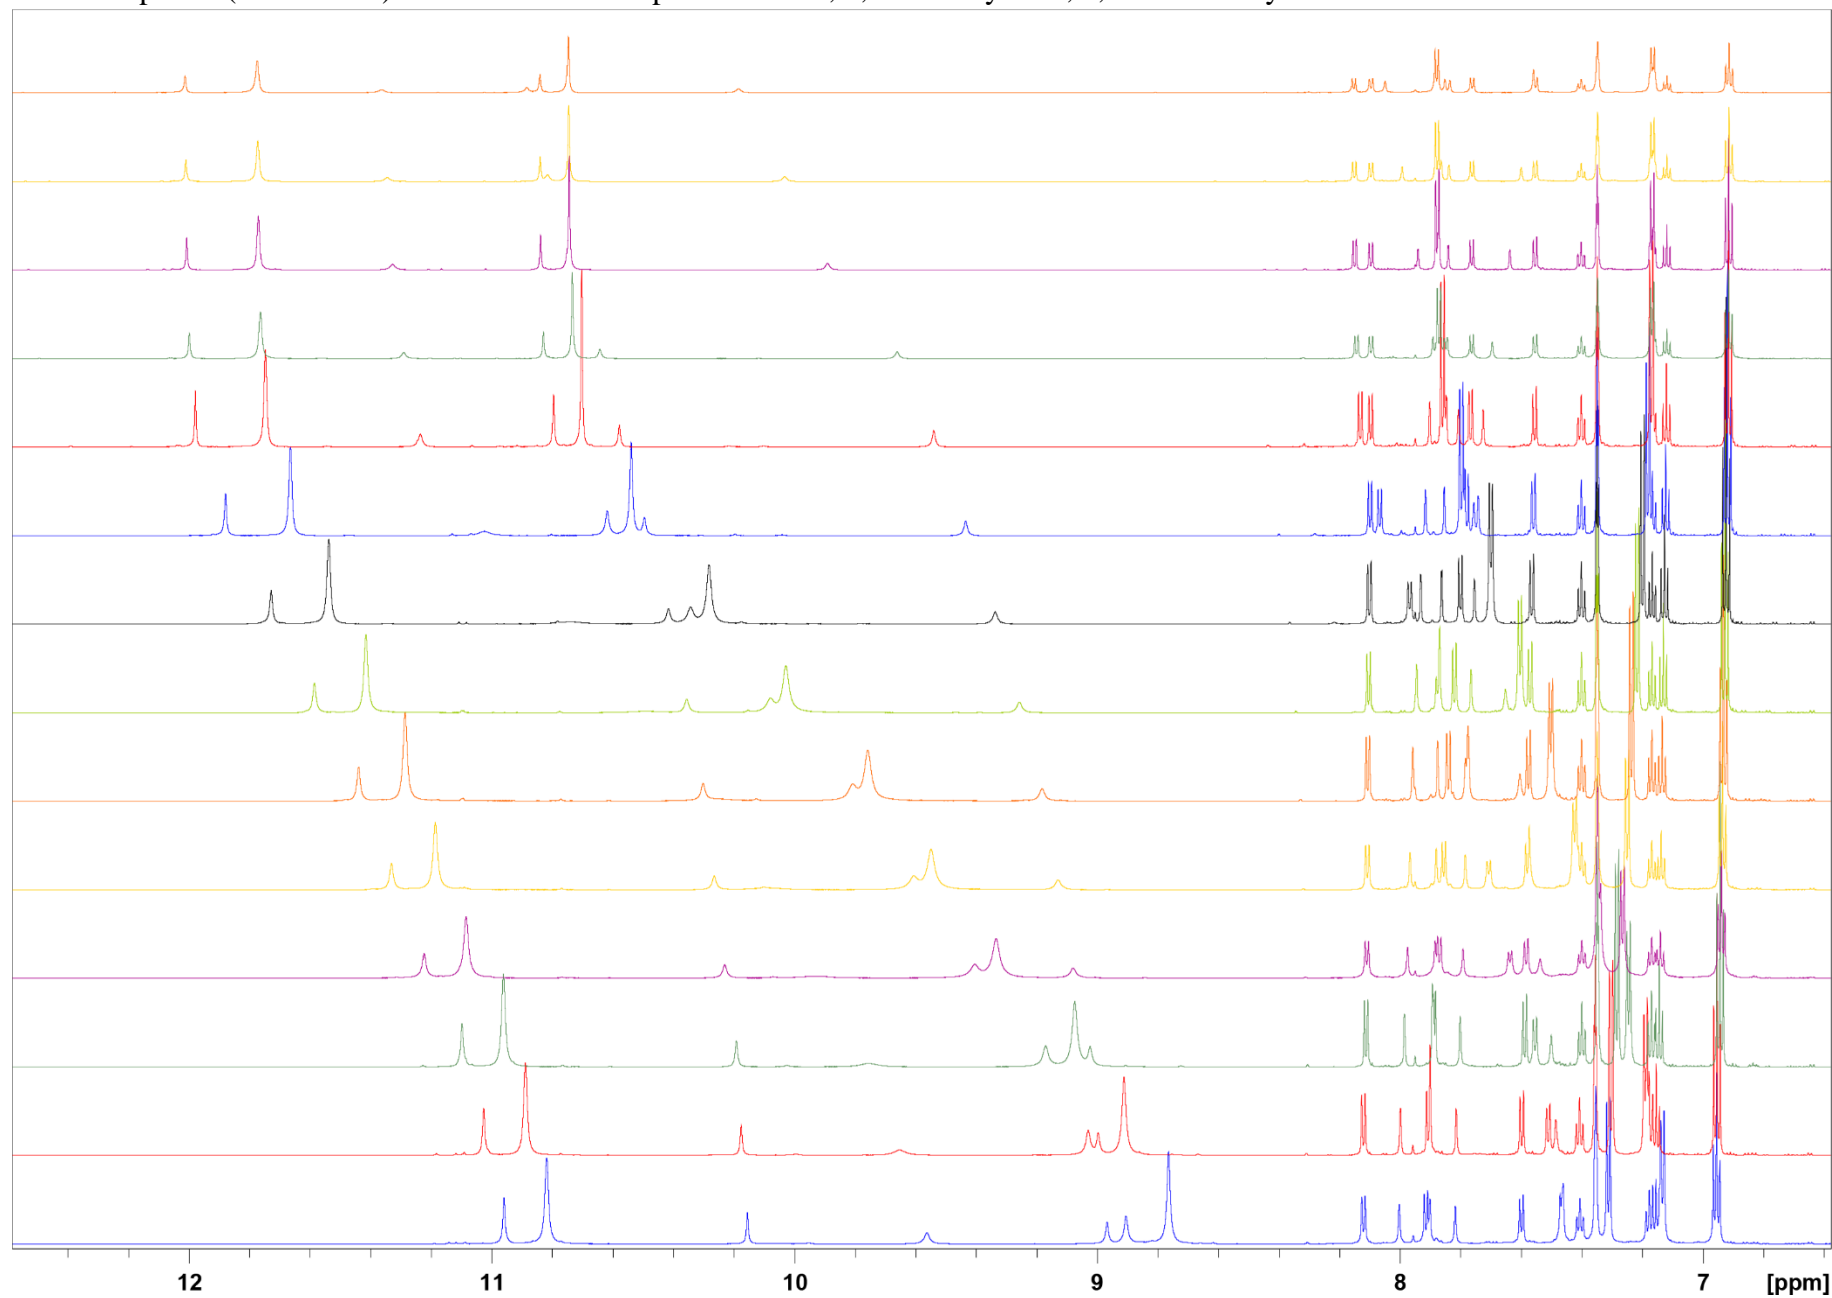

Stacked  $^1\text{H}$  NMR spectra (700.1 MHz) of a mixture of receptors **MC005**; 1,3-diindolylurea; 1,3-dicarbazolylurea + TBA-acetate

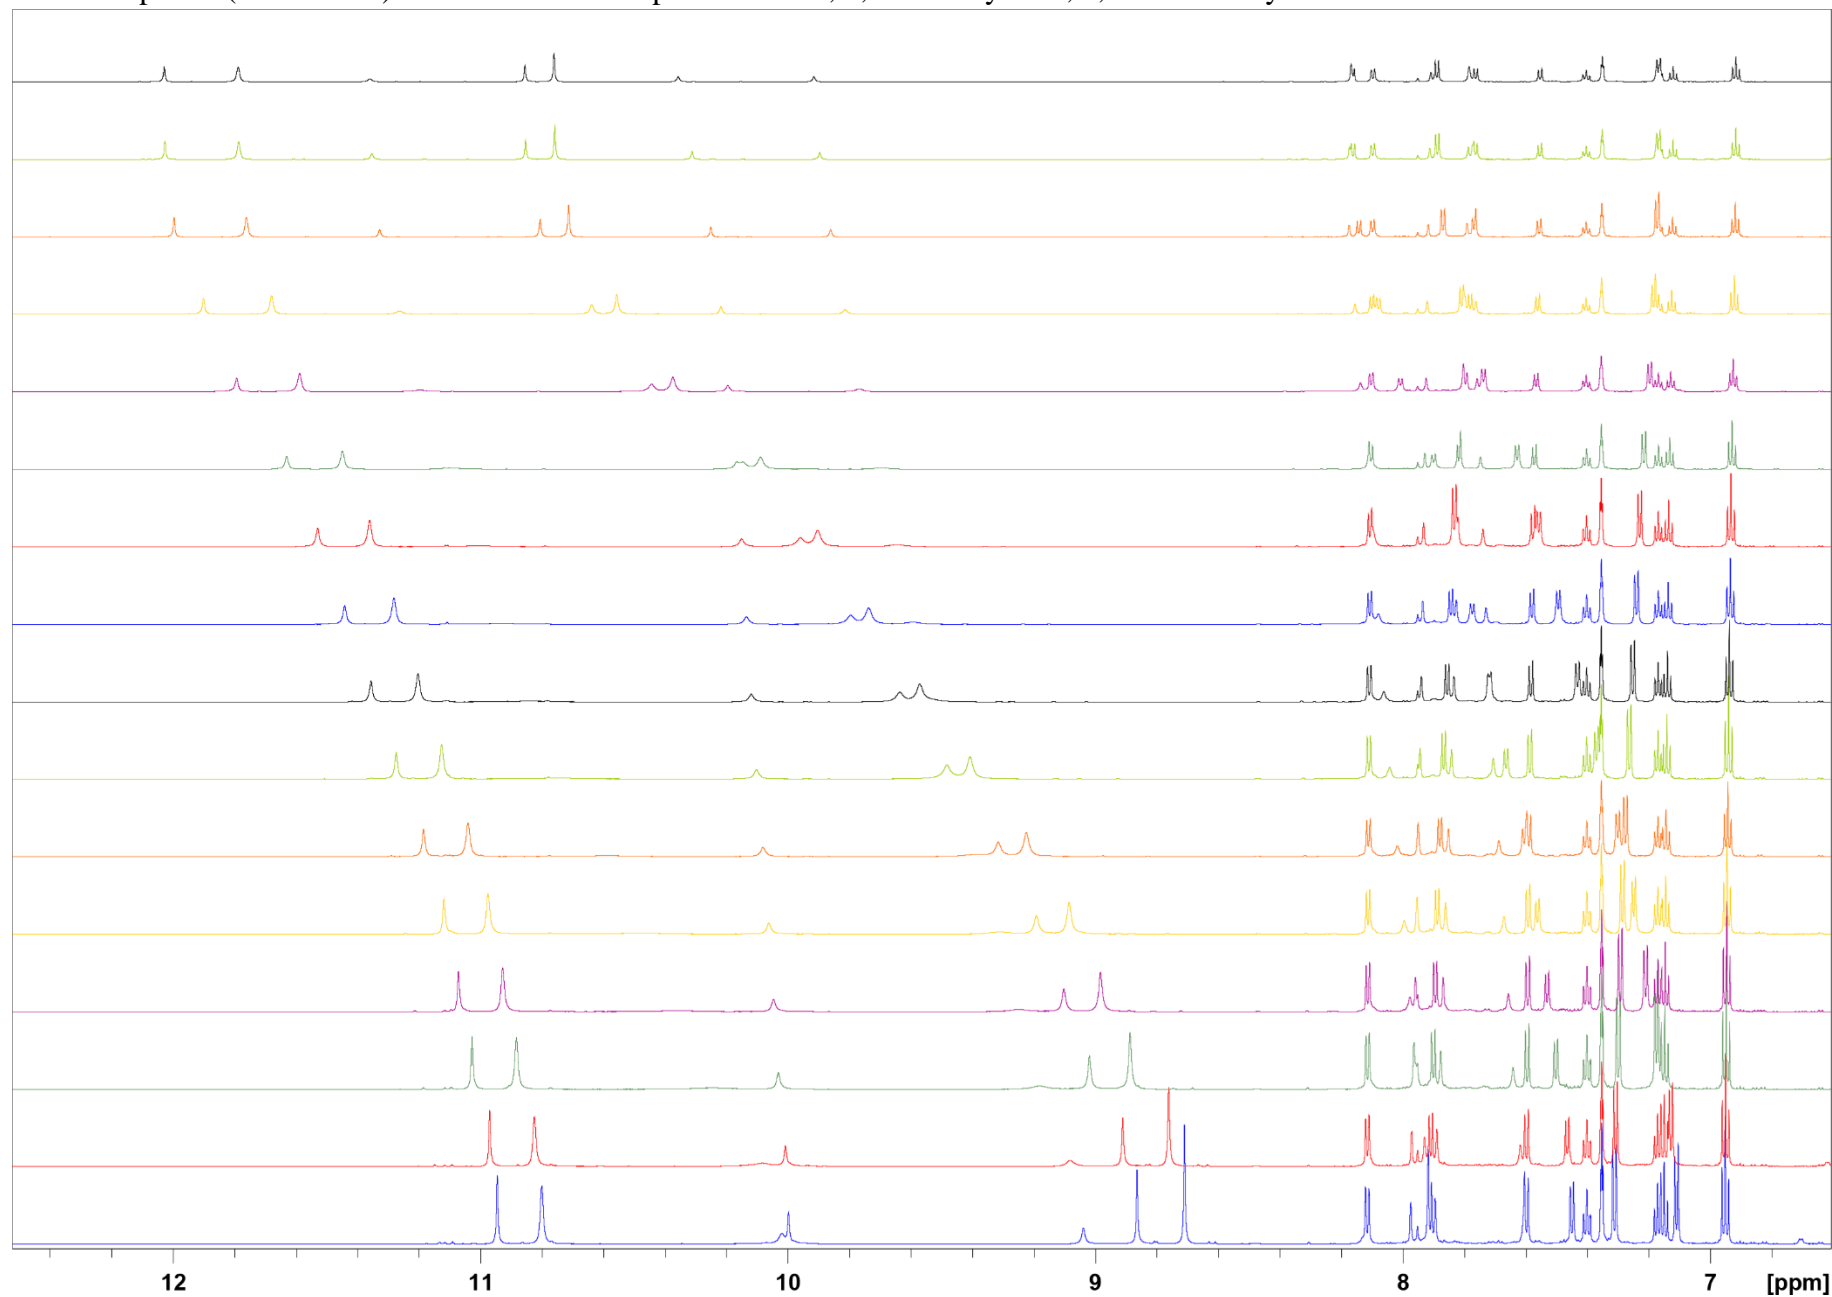

Stacked  $^1\text{H}$  NMR spectra (700.1 MHz) of a mixture of receptors **MC006**; 1,3-diindolylurea; 1,3-dicarbazolylurea + TBA-acetate

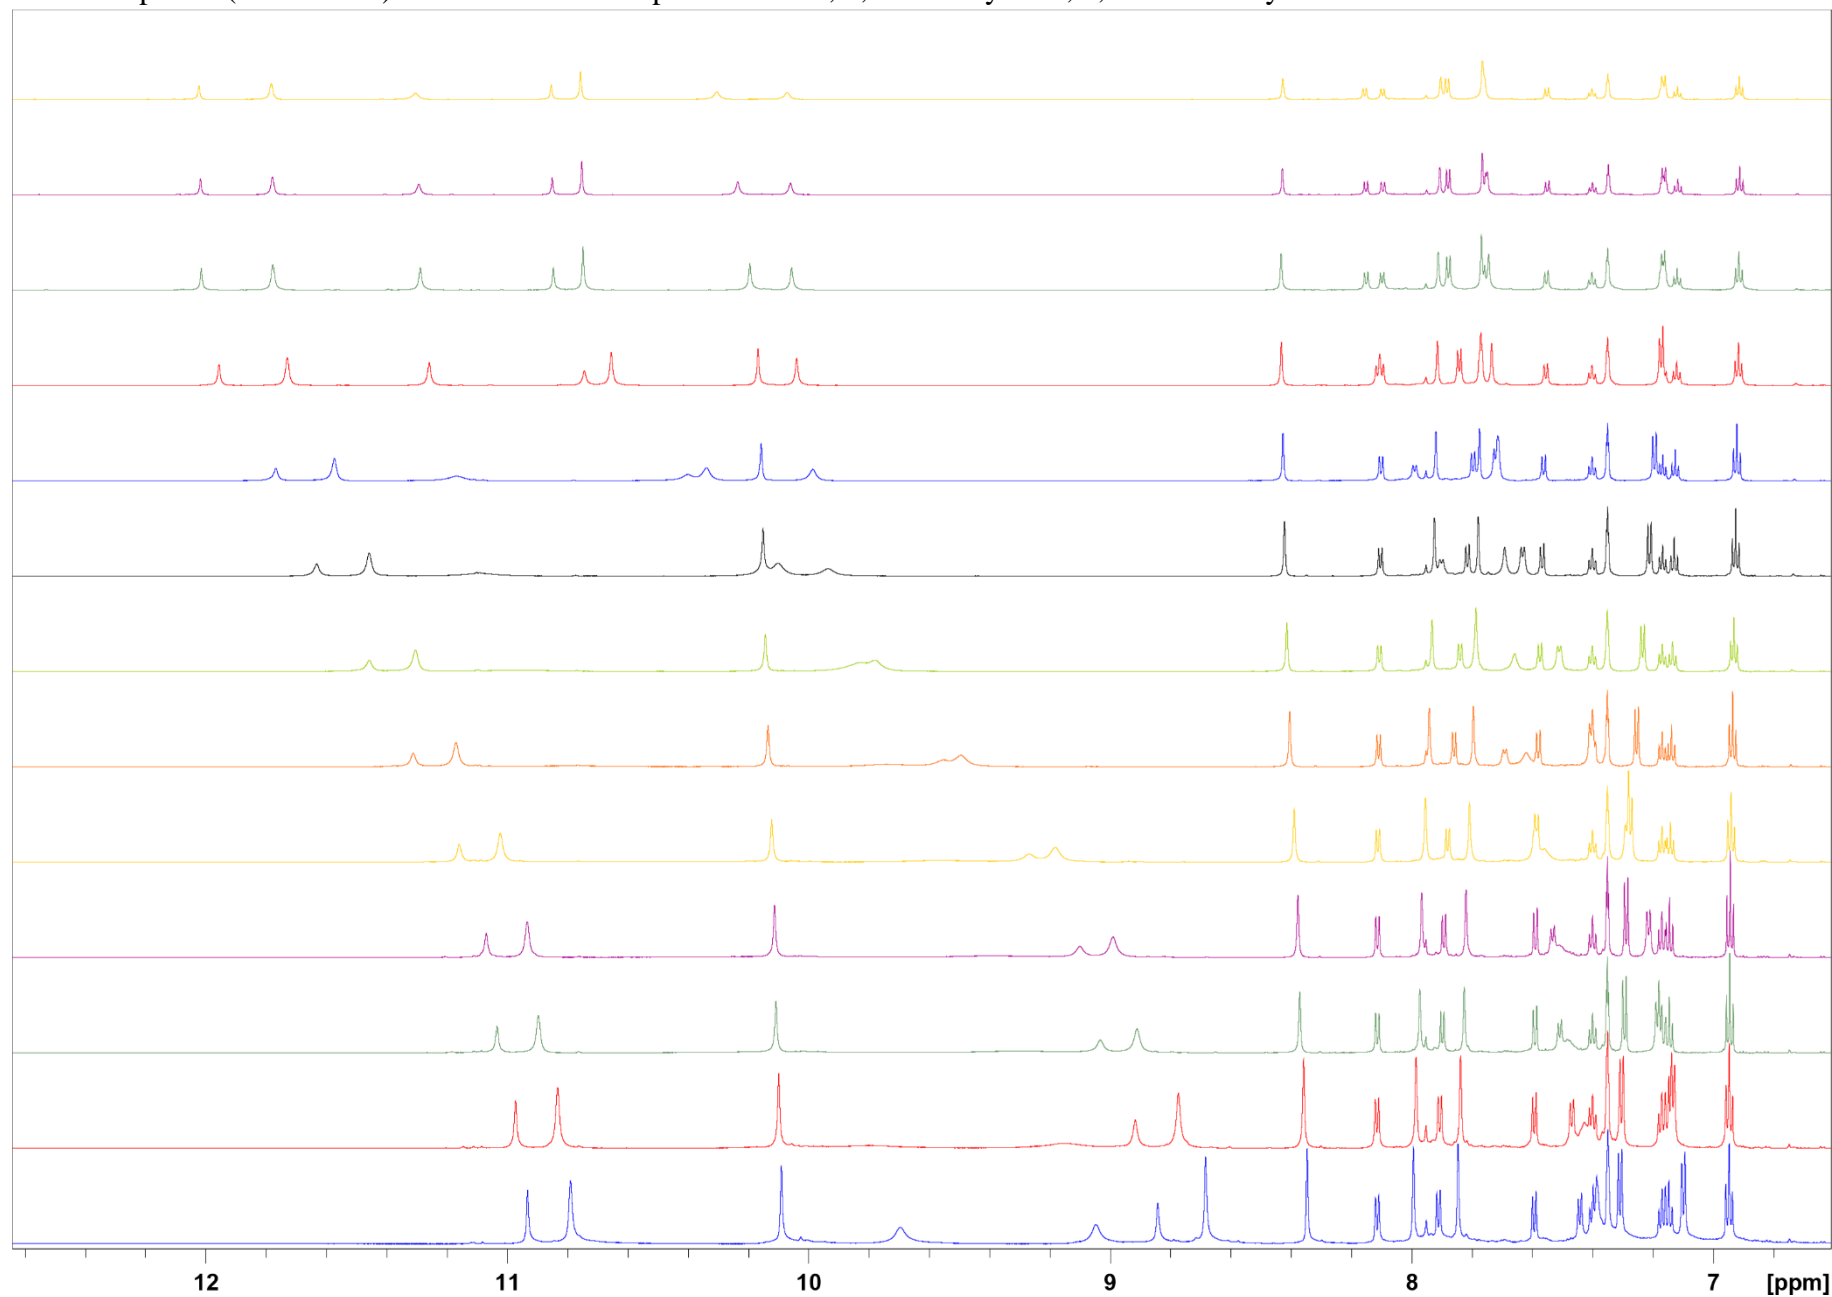



Stacked  $^1\text{H}$  NMR spectra (700.1 MHz) of a mixture of receptors **MC007**; 1,3-diindolylurea; 1,3-dicarbazolylurea + TBA-acetate

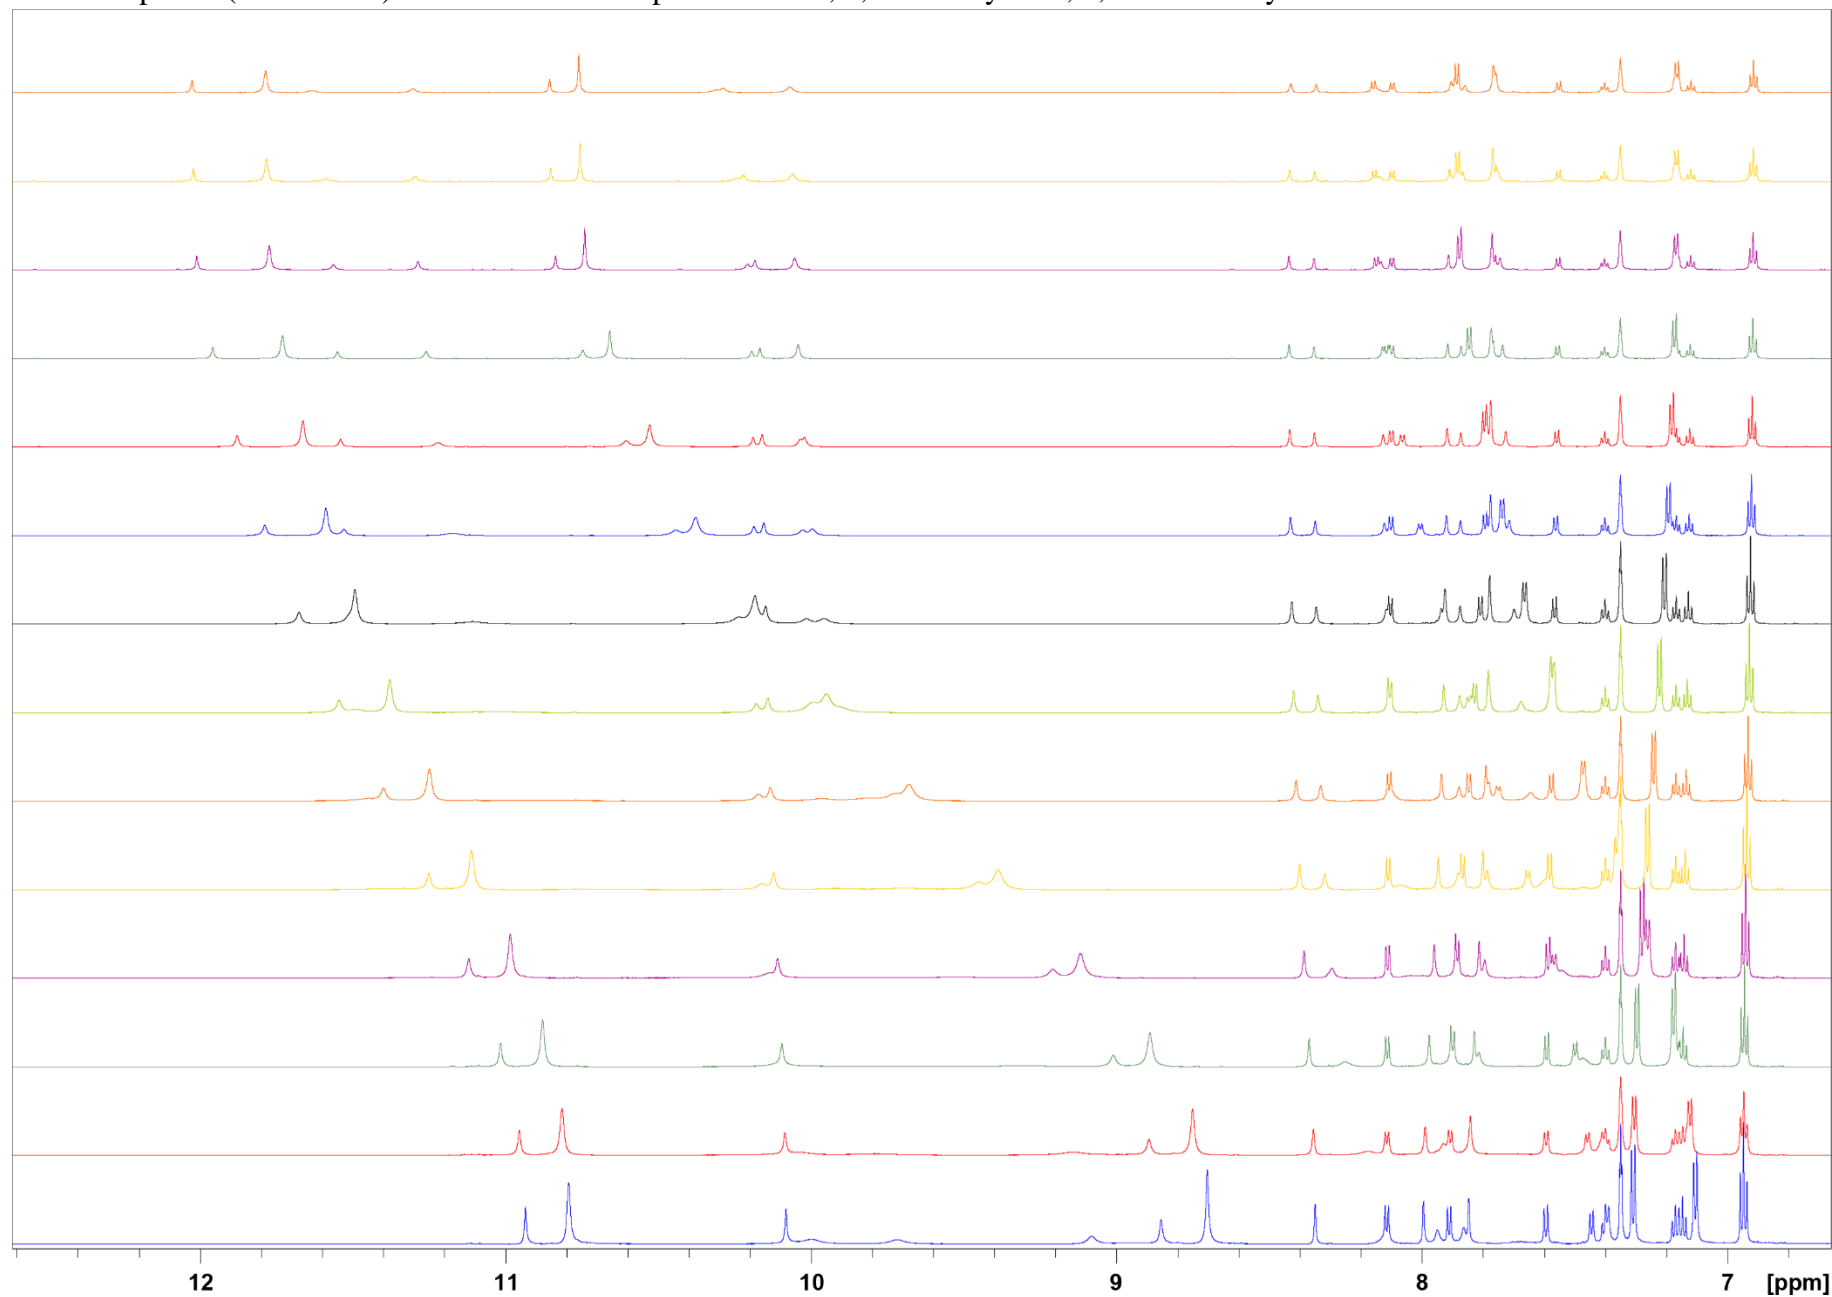

Stacked  $^1\text{H}$  NMR spectra (700.1 MHz) of a mixture of receptors **MC008**; 1,3-diindolylurea; 1,3-dicarbazolylurea + TBA-acetate

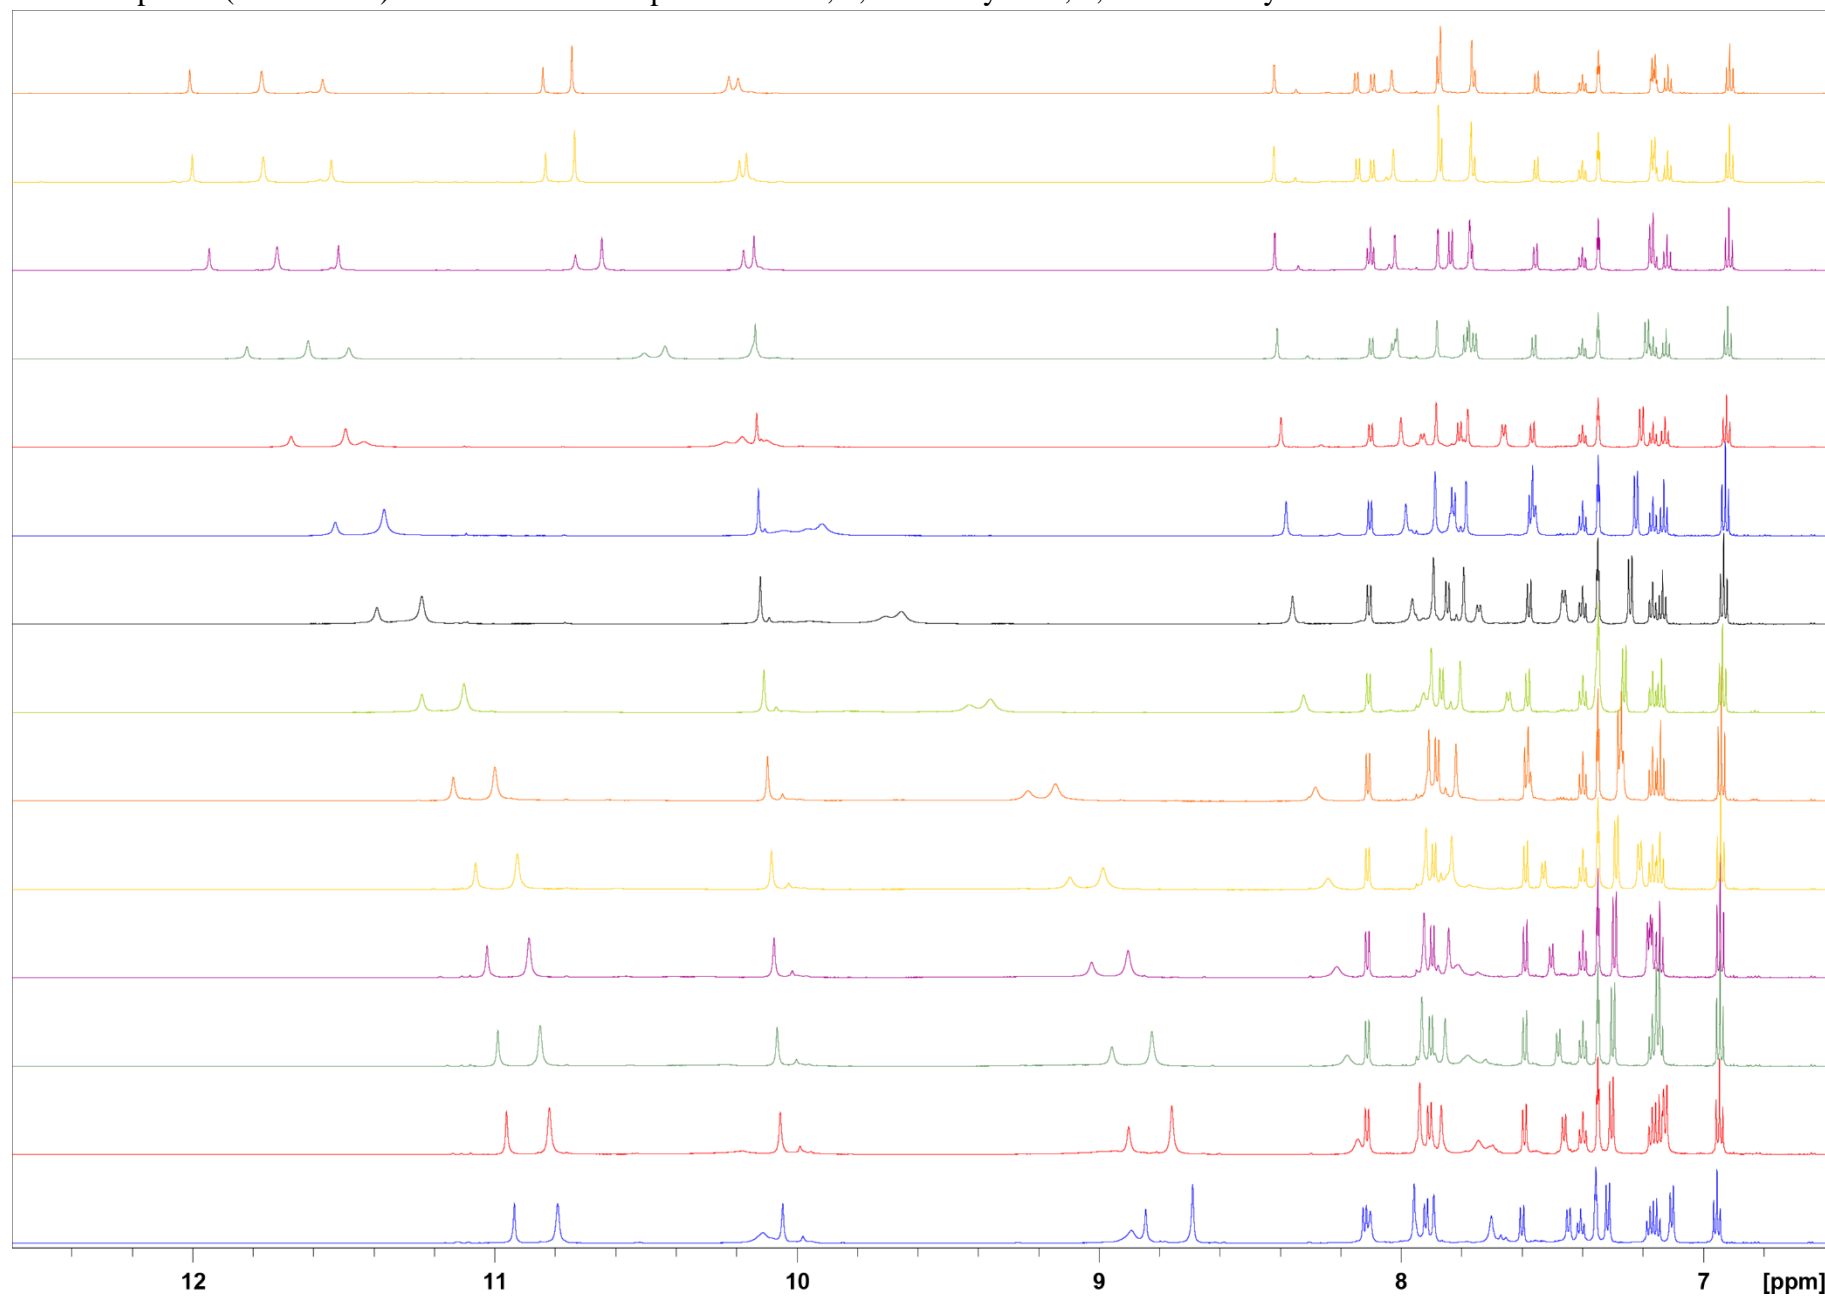

Stacked  $^1\text{H}$  NMR spectra (700.1 MHz) of a mixture of receptors **MC009**; **MC008**; 1,3-diindolylurea + TBA-acetate

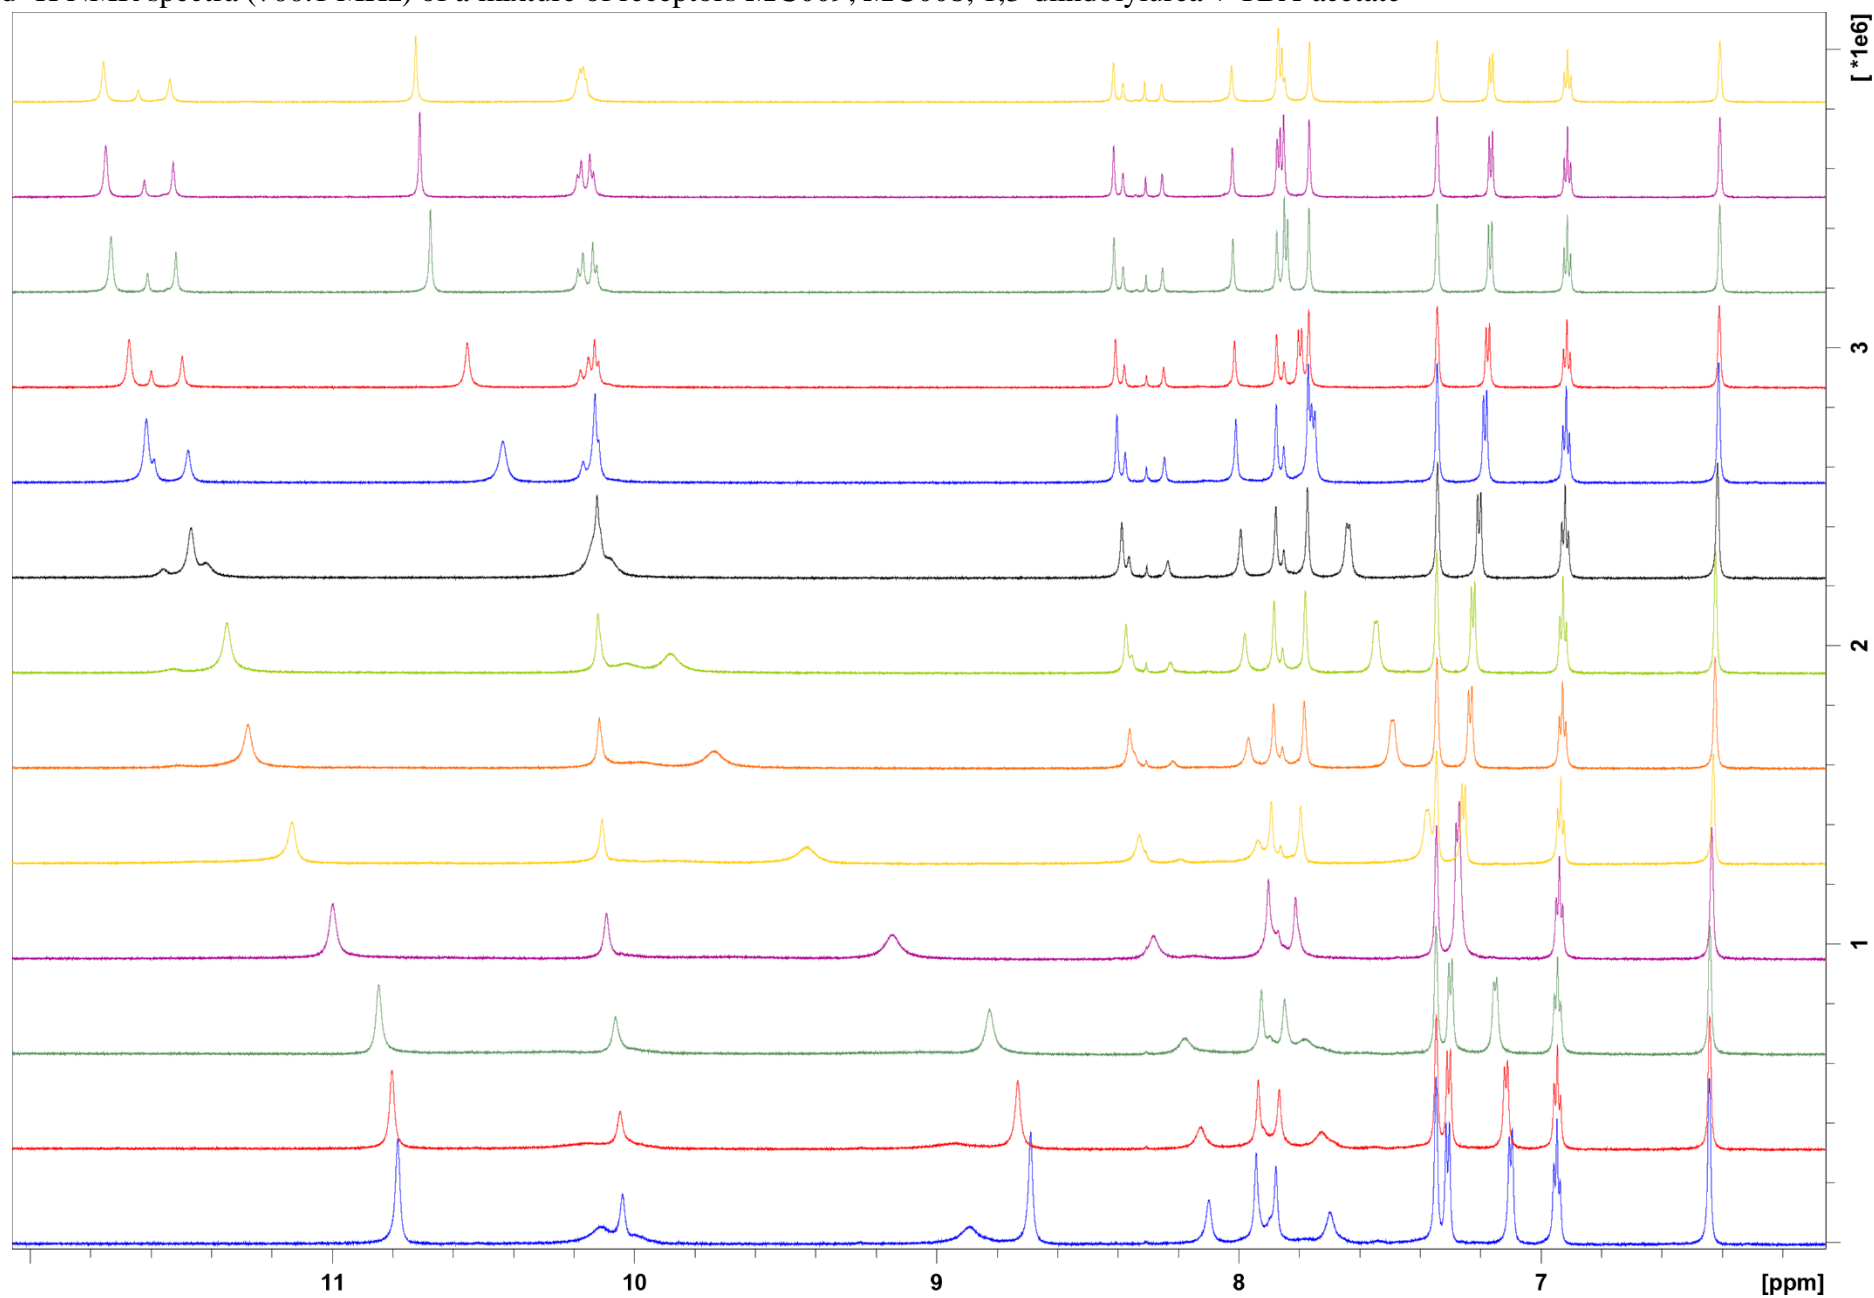

Stacked  $^1\text{H}$  NMR spectra (700.1 MHz) of a mixture of receptors **MC010**; 1,3-diindolylurea; 1,3-dicarbazolylurea + TBA-acetate

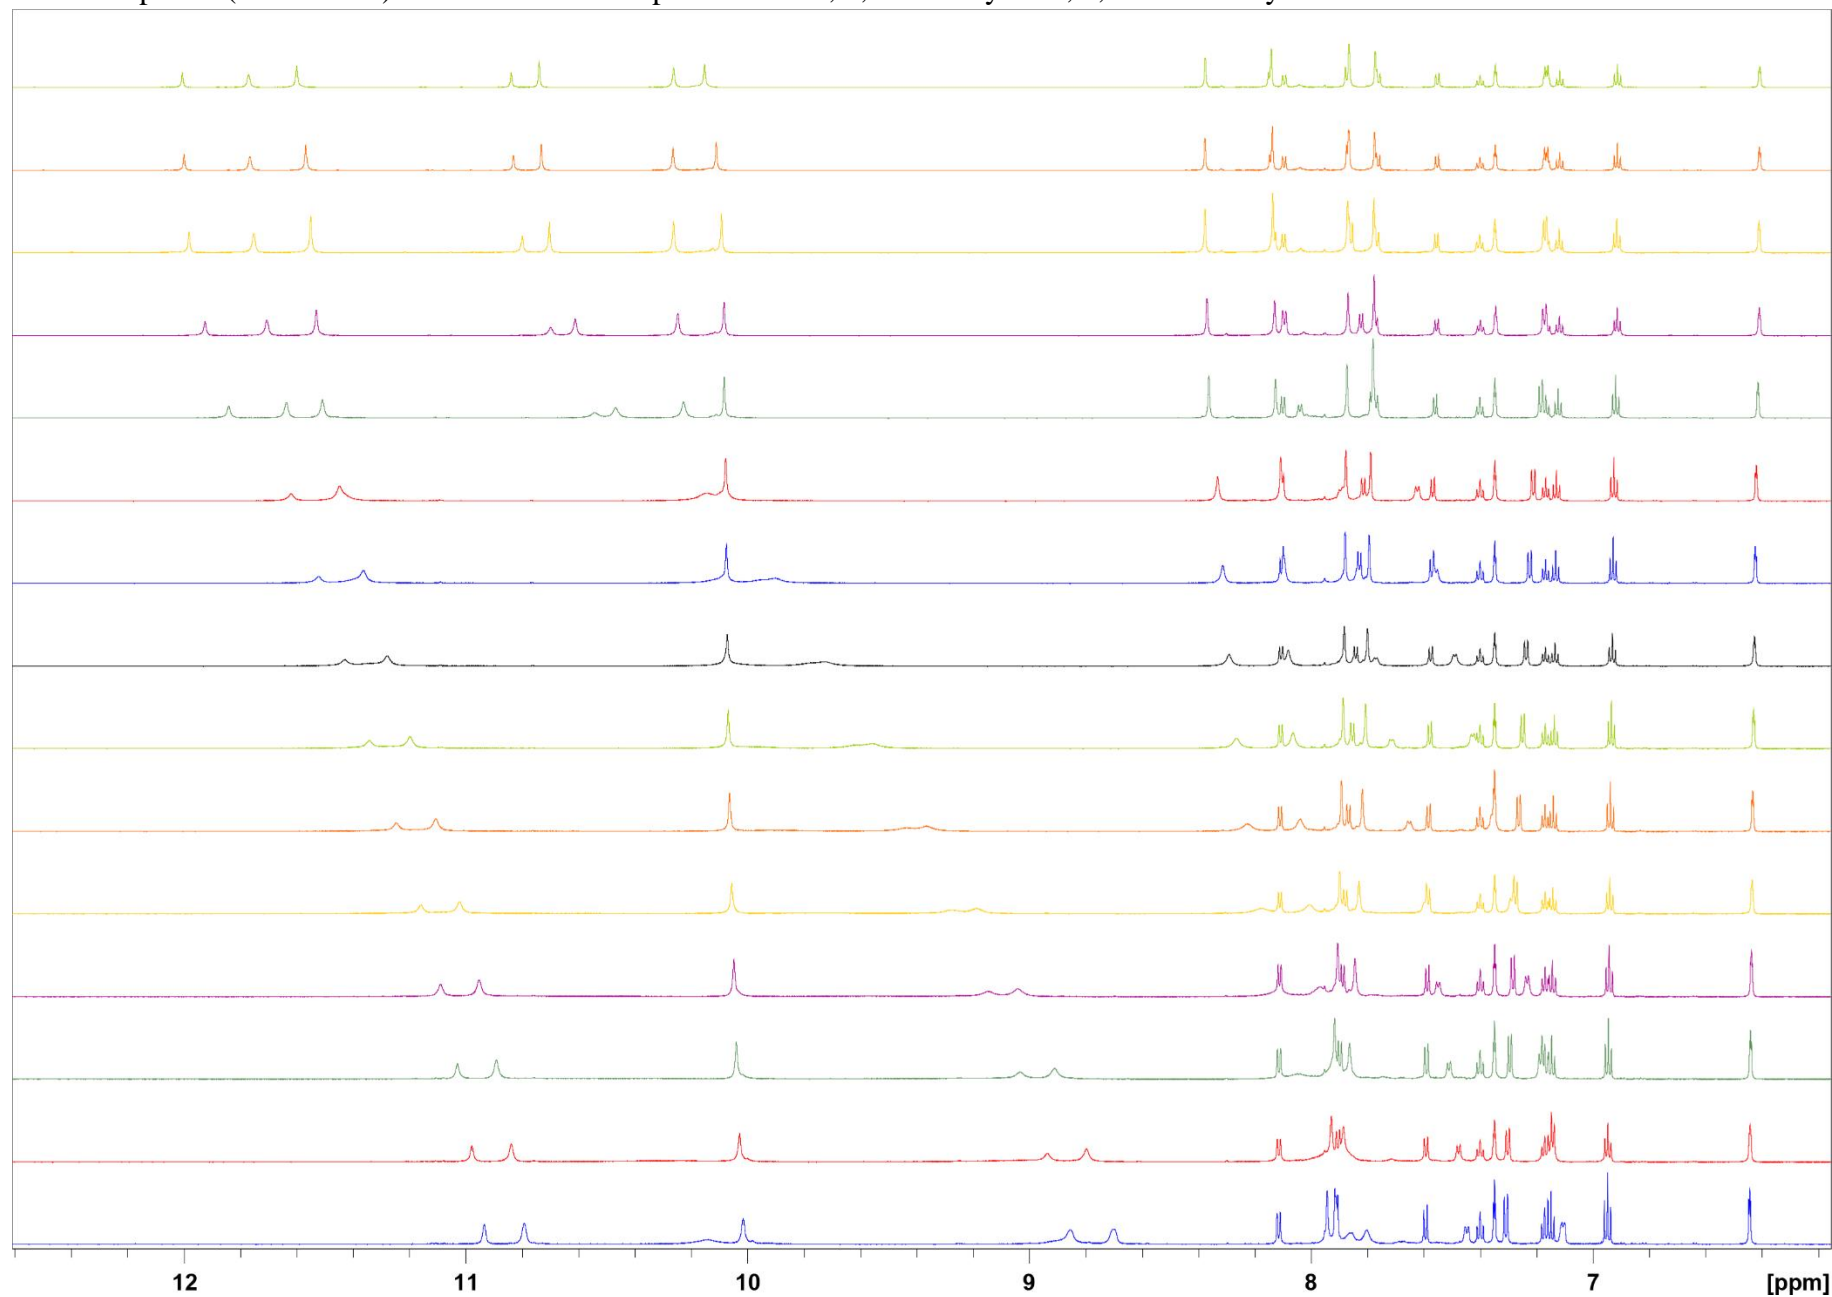

Stacked  $^1\text{H}$  NMR spectra (700.1 MHz) of a mixture of receptors **MC011**; 1,3-diindolylurea; 1,3-dicarbazolylurea + TBA-acetate

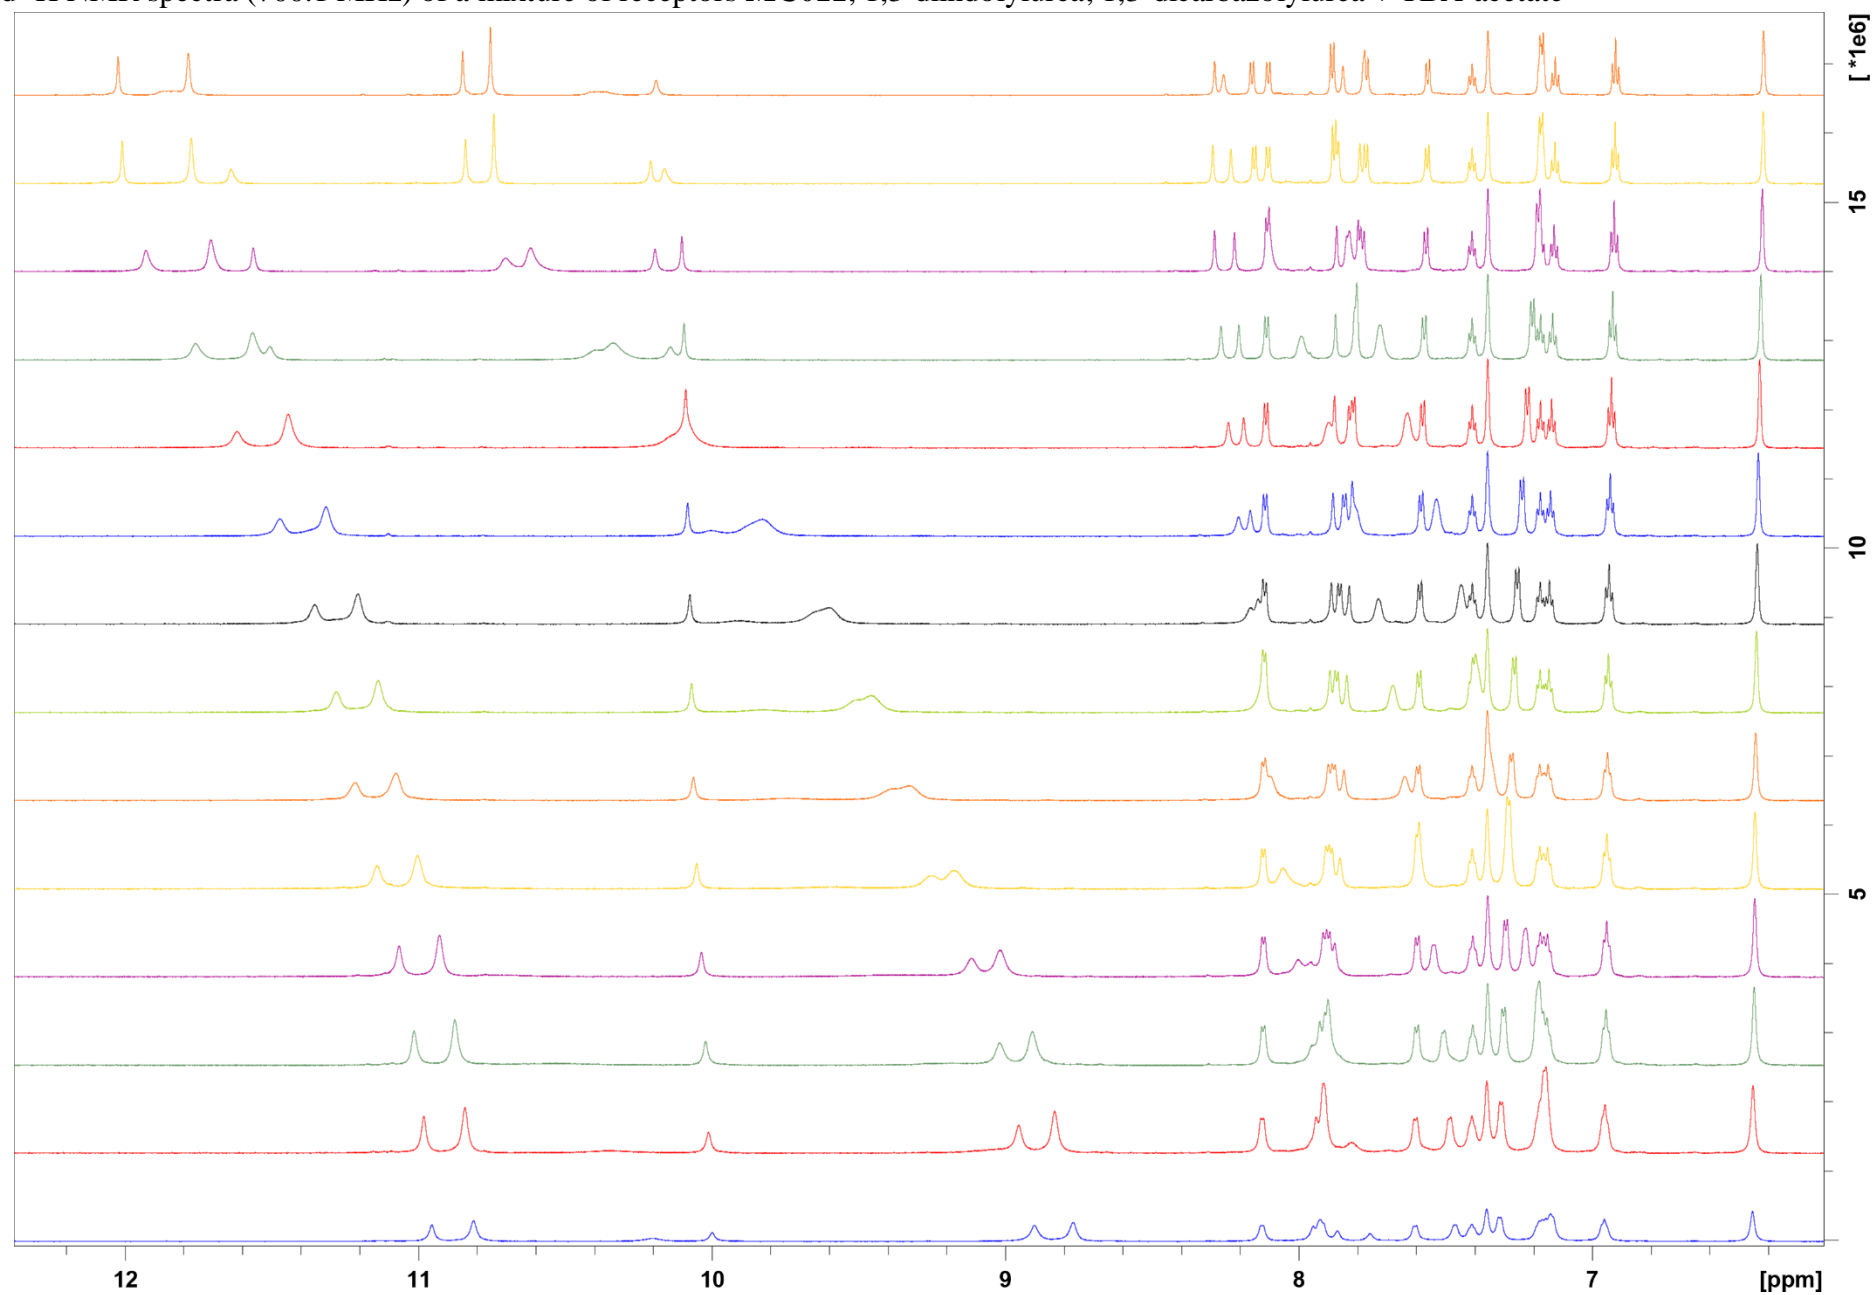

Stacked  $^1\text{H}$  NMR spectra (700.1 MHz) of a mixture of receptors **MC012**; 1,3-diindolylurea; 1,3-dicarbazolylurea + TBA-acetate

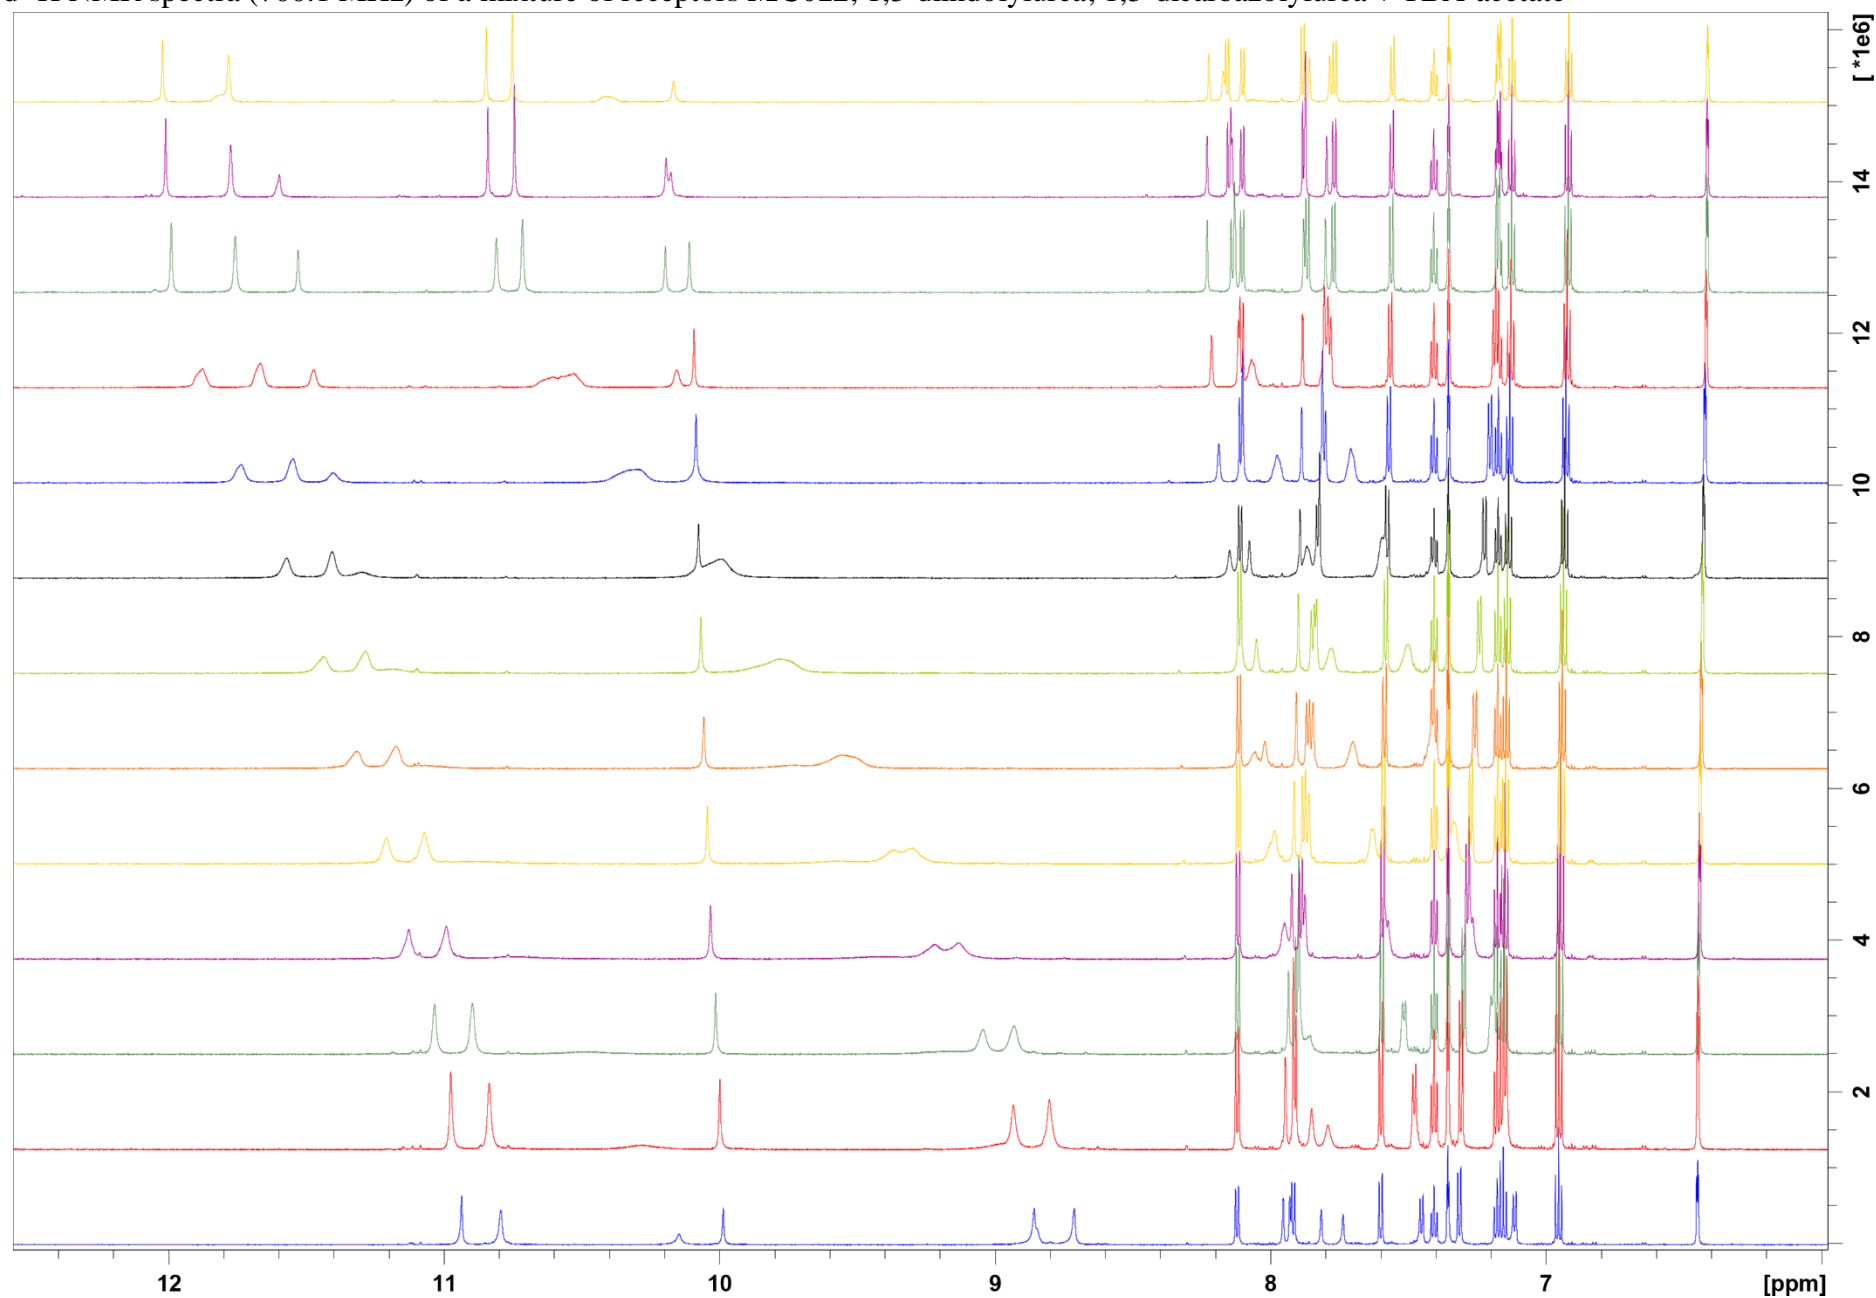

Stacked  $^1\text{H}$  NMR spectra (700.1 MHz) of a mixture of receptors **MC013**; 1,3-diindolylurea; 1,3-dicarbazolylurea + TBA-acetate

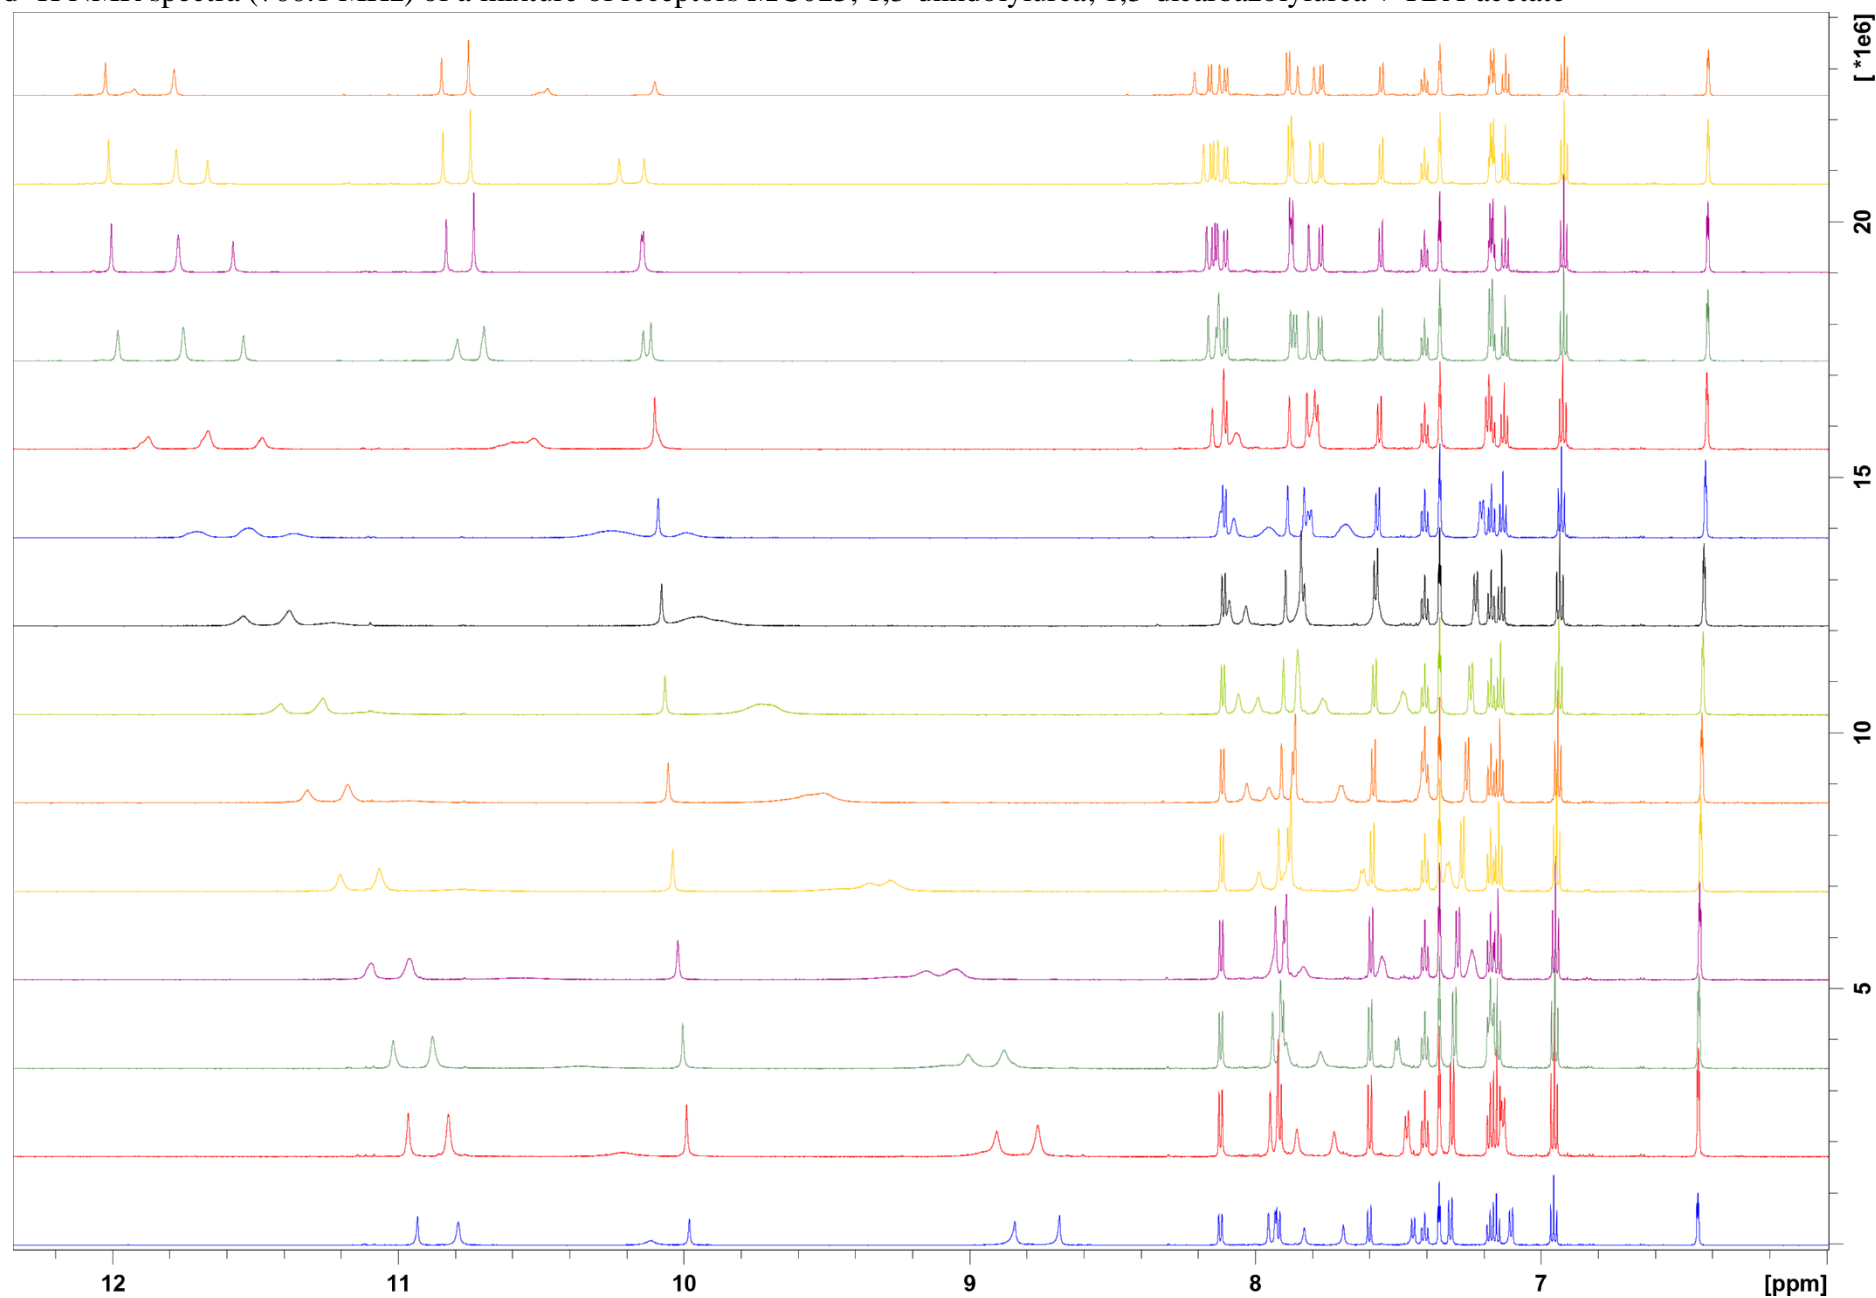

Stacked  $^1\text{H}$  NMR spectra (700.1 MHz) of a mixture of receptors **MC014**; 1,3-diindolylurea; 1,3-dicarbazolylurea + TBA-acetate

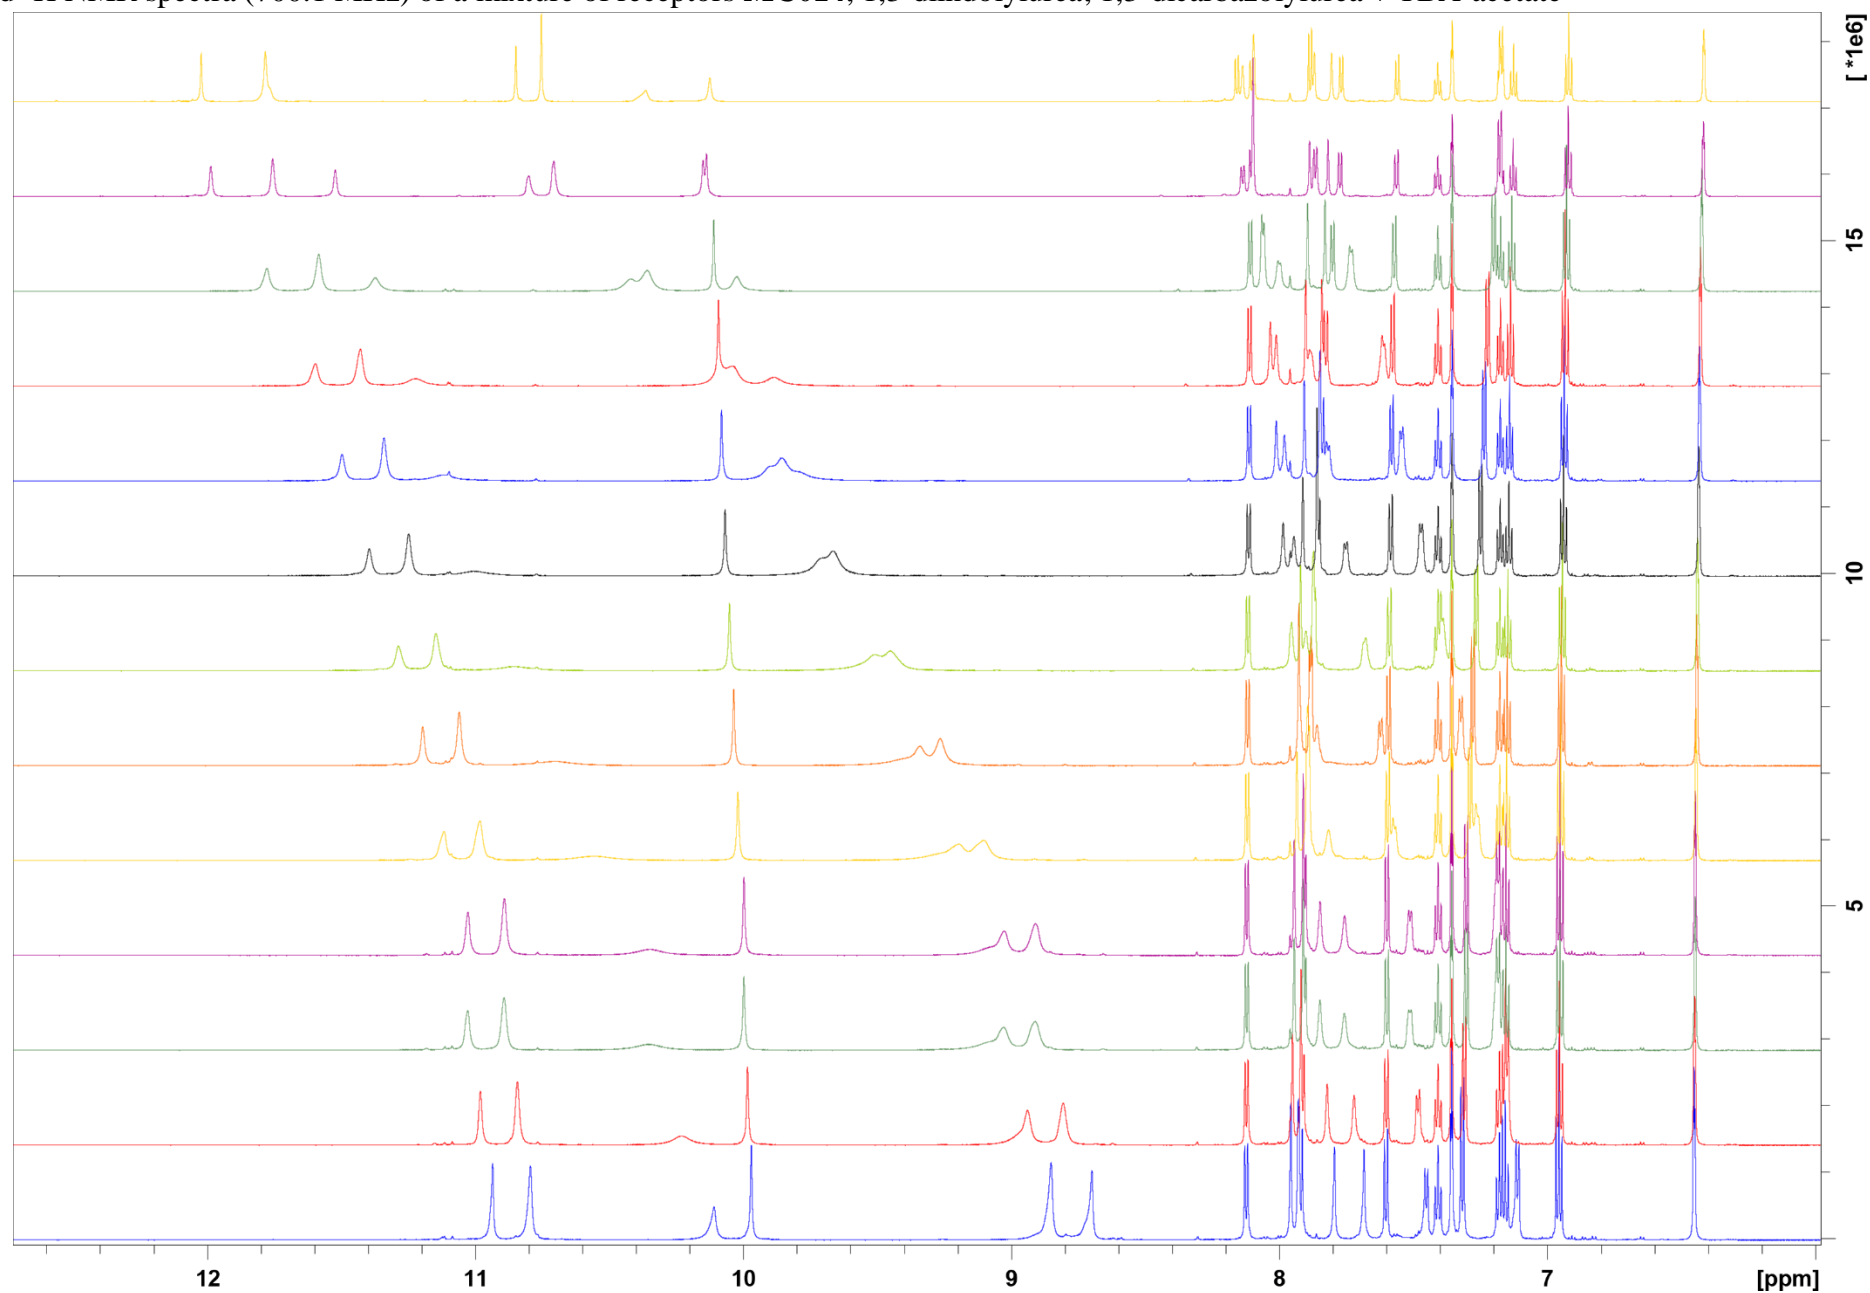



Stacked  $^1\text{H}$  NMR spectra (700.1 MHz) of a mixture of receptors **CZ016**; **MC002**; 2,7-(COOBu) $_2$ -indolocarbazole; 2,9-(COOBu) $_2$ -indolocarbazole + TBA-benzoate

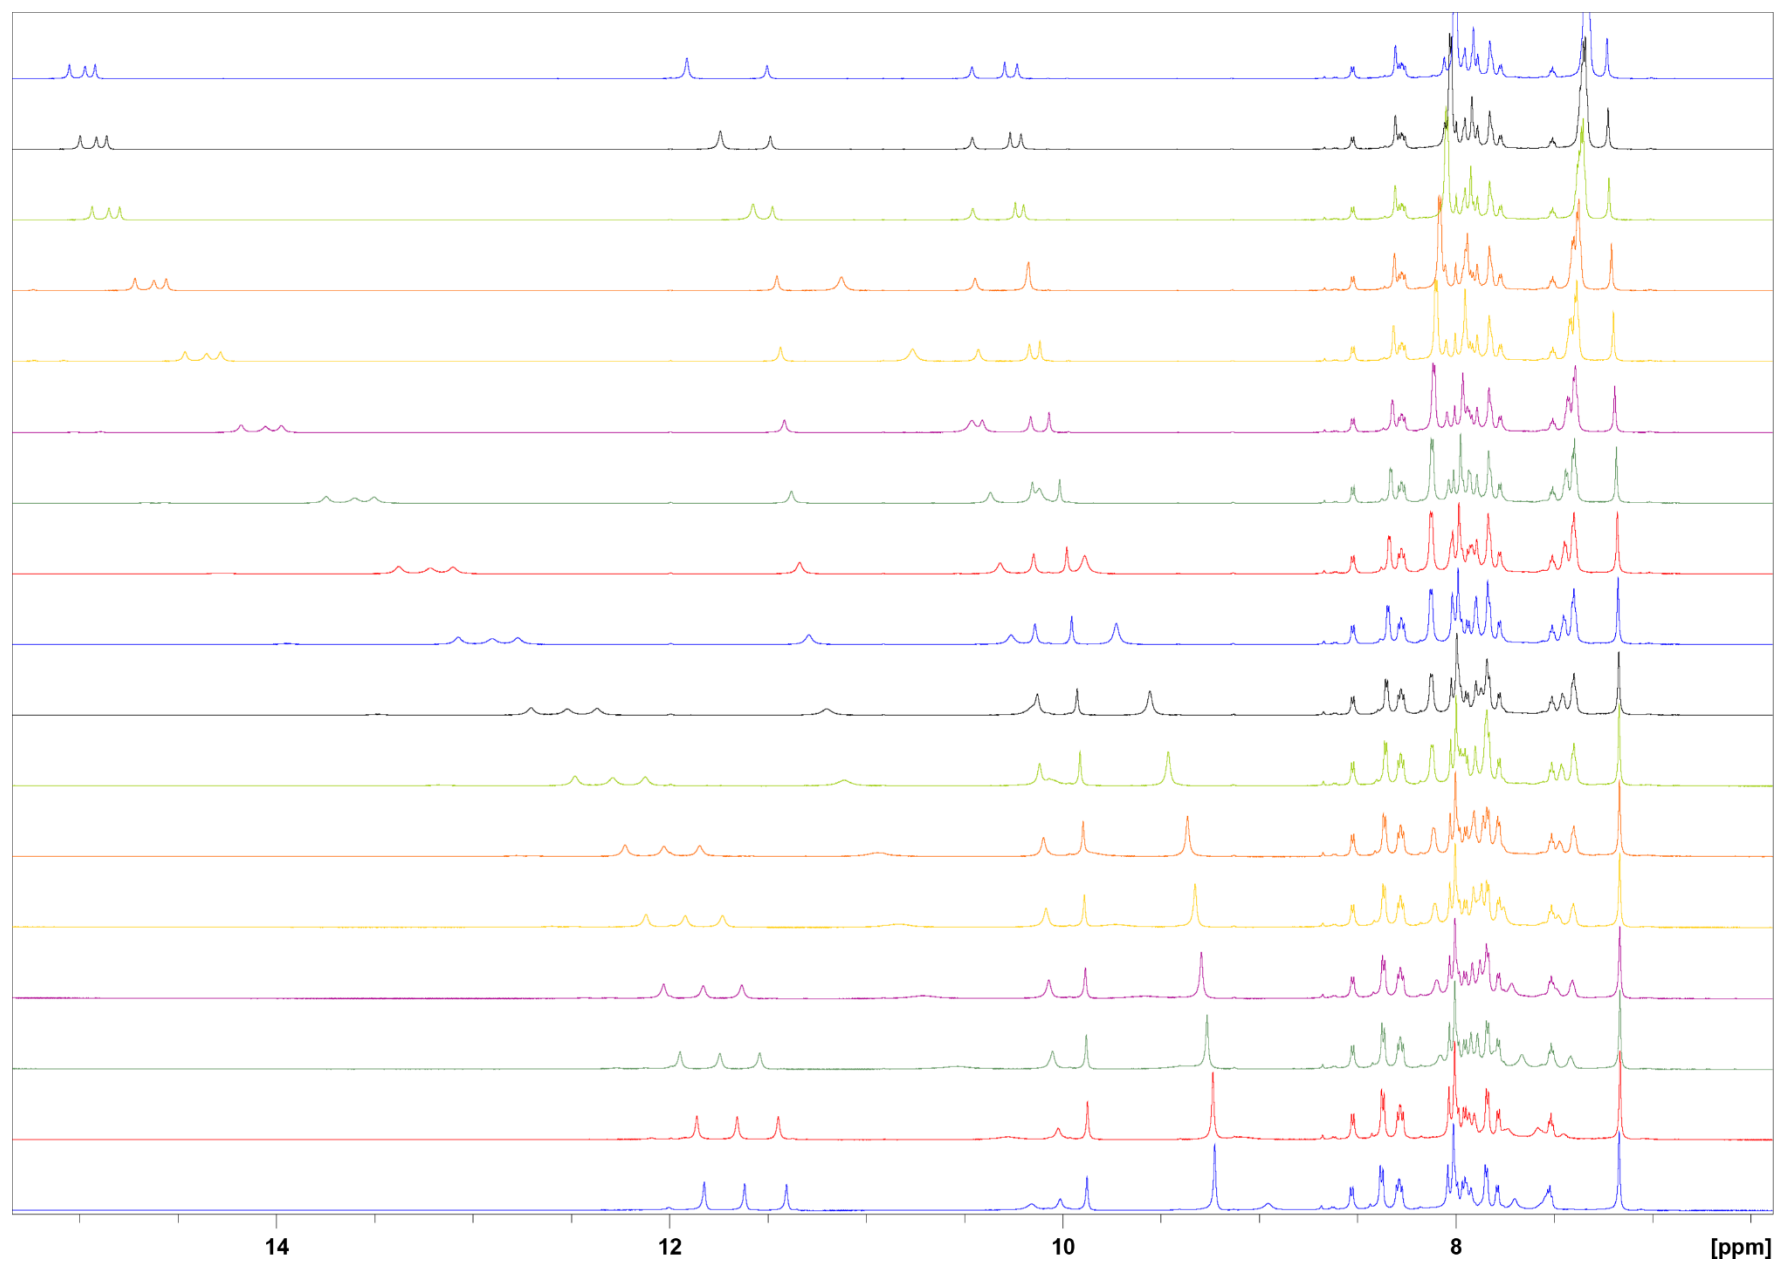

Stacked  $^1\text{H}$  NMR spectra (700.1 MHz) of a mixture of receptors **MC001**; 2,7-(COOBu) $_2$ -indolocarbazole; 2,9-(COOBu) $_2$ -indolocarbazole + TBA-benzoate

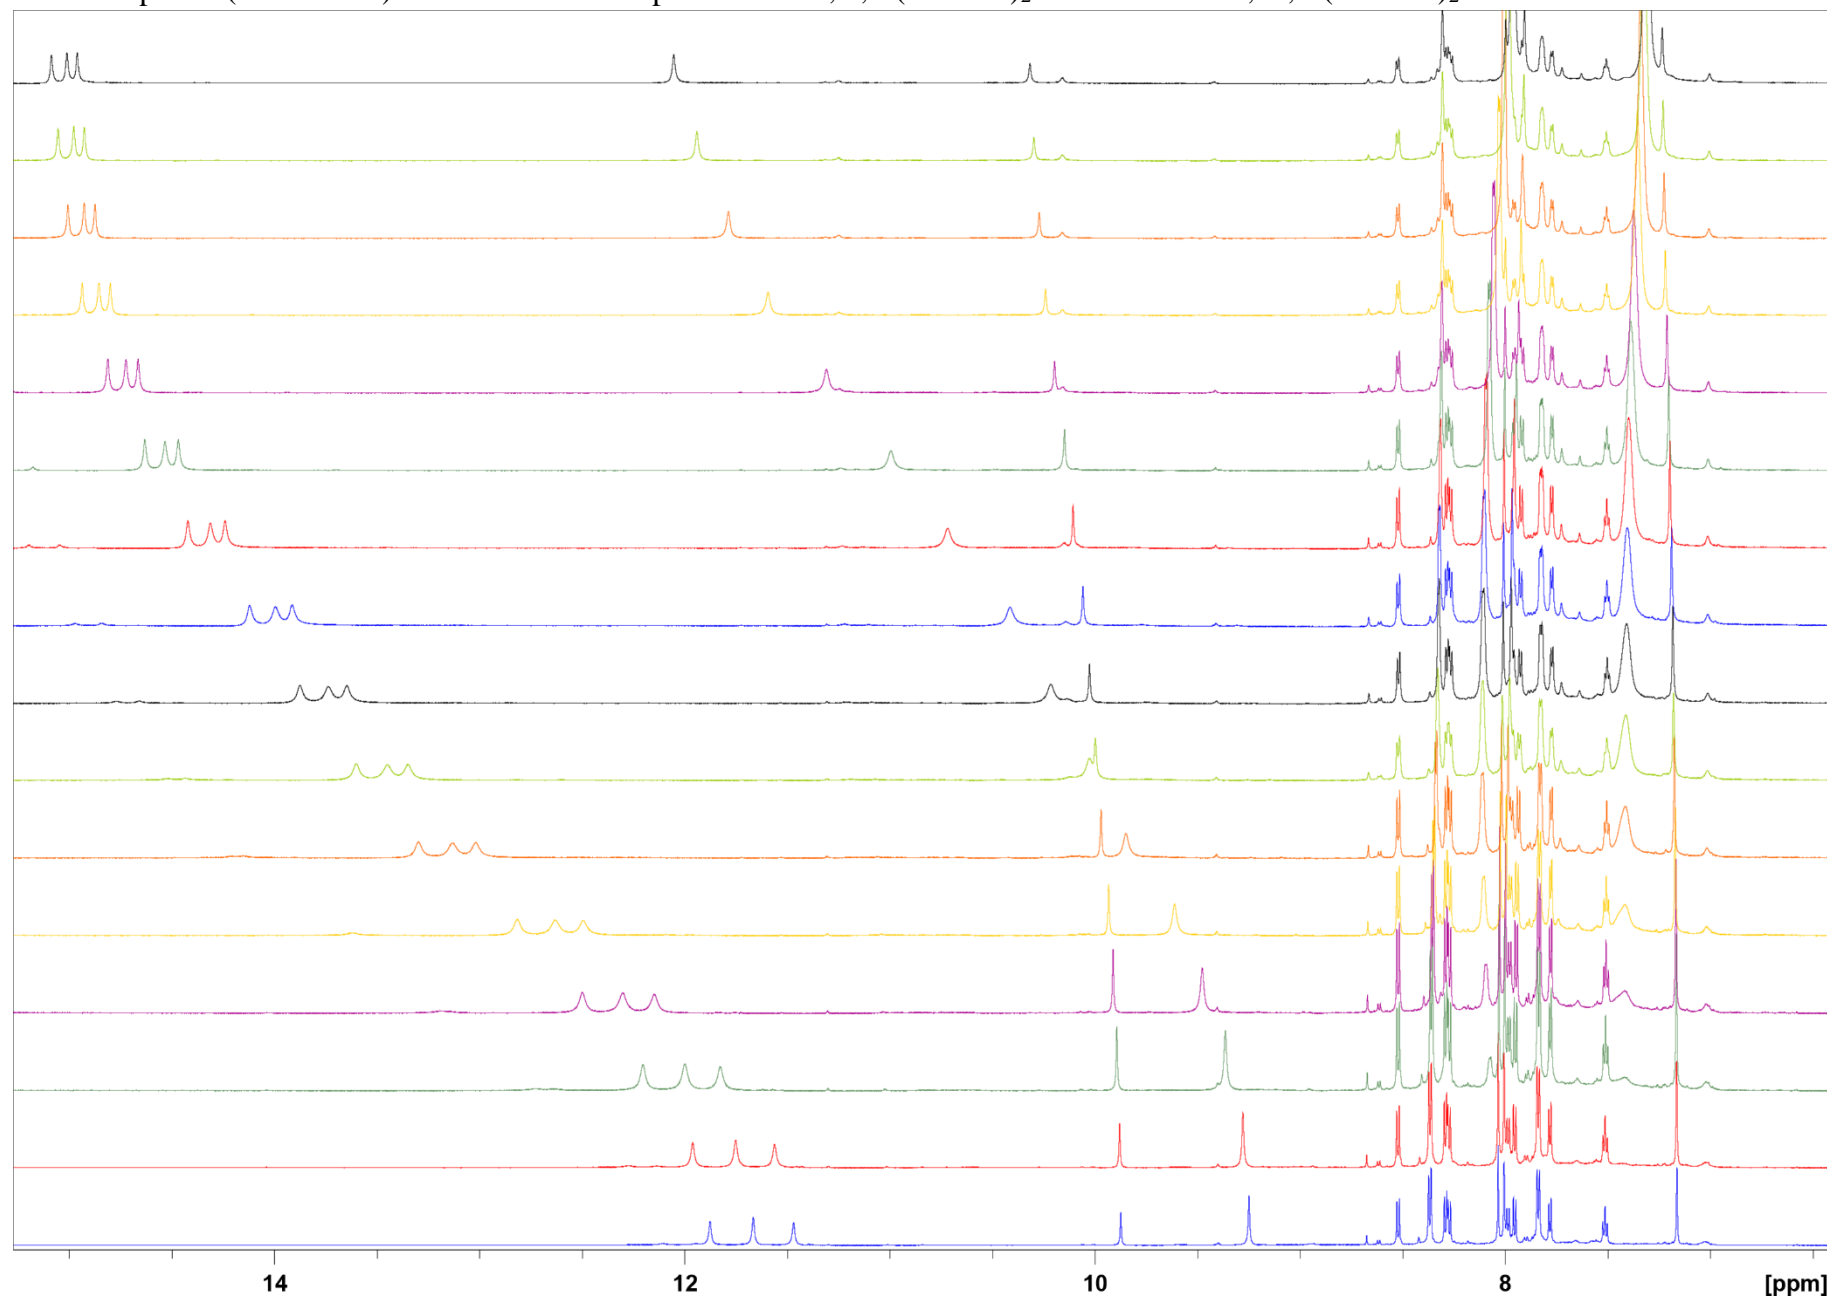

Stacked  $^1\text{H}$  NMR spectra (700.1 MHz) of a mixture of receptors **MC003**; 1,3-diindolylurea; 1,3-dicarbazolylurea + TBA-benzoate

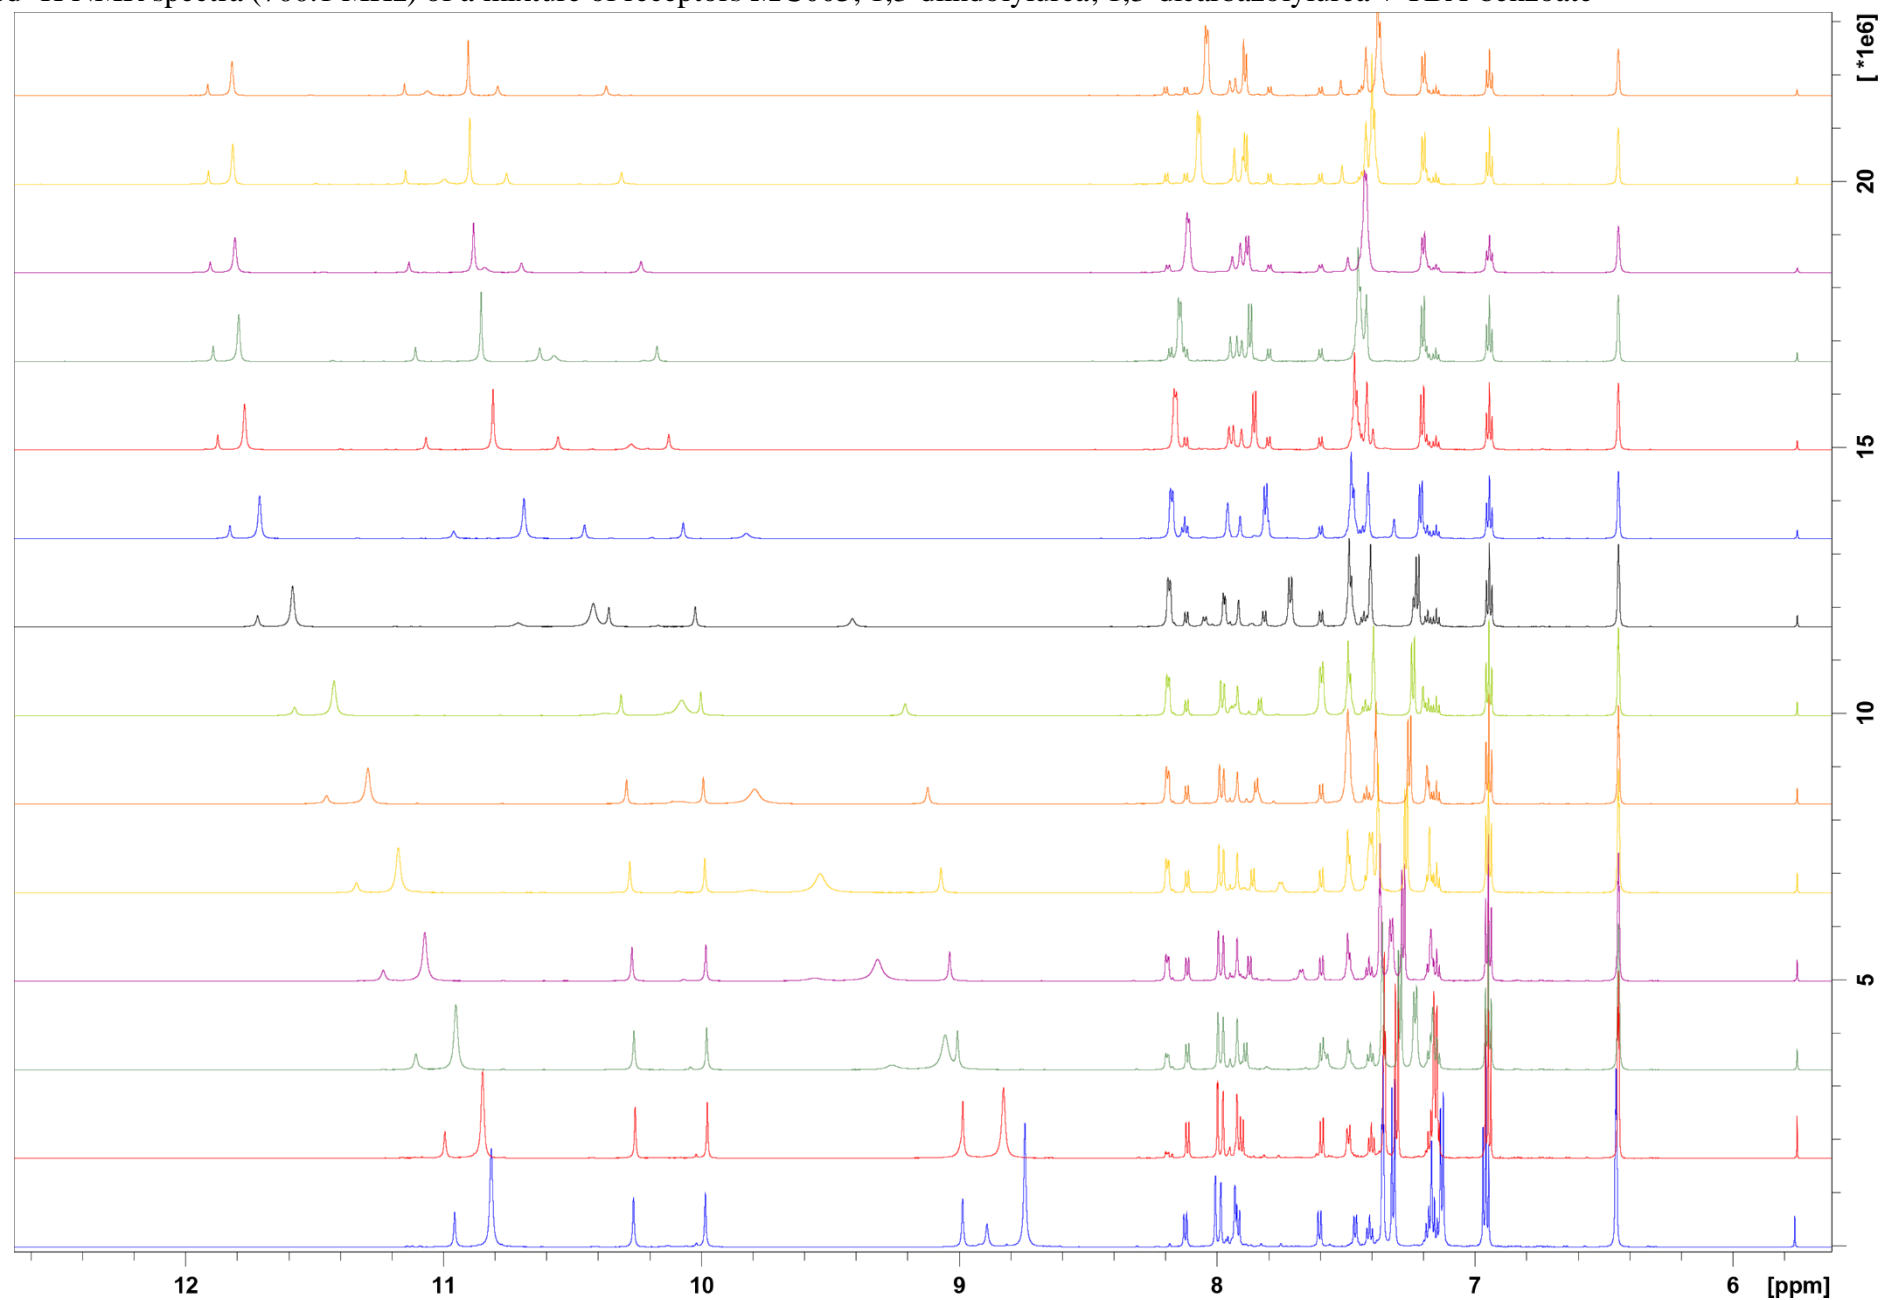

Stacked  $^1\text{H}$  NMR spectra (700.1 MHz) of a mixture of receptors **MC004**; 1,3-diindolylurea; 1,3-dicarbazolylurea + TBA-benzoate

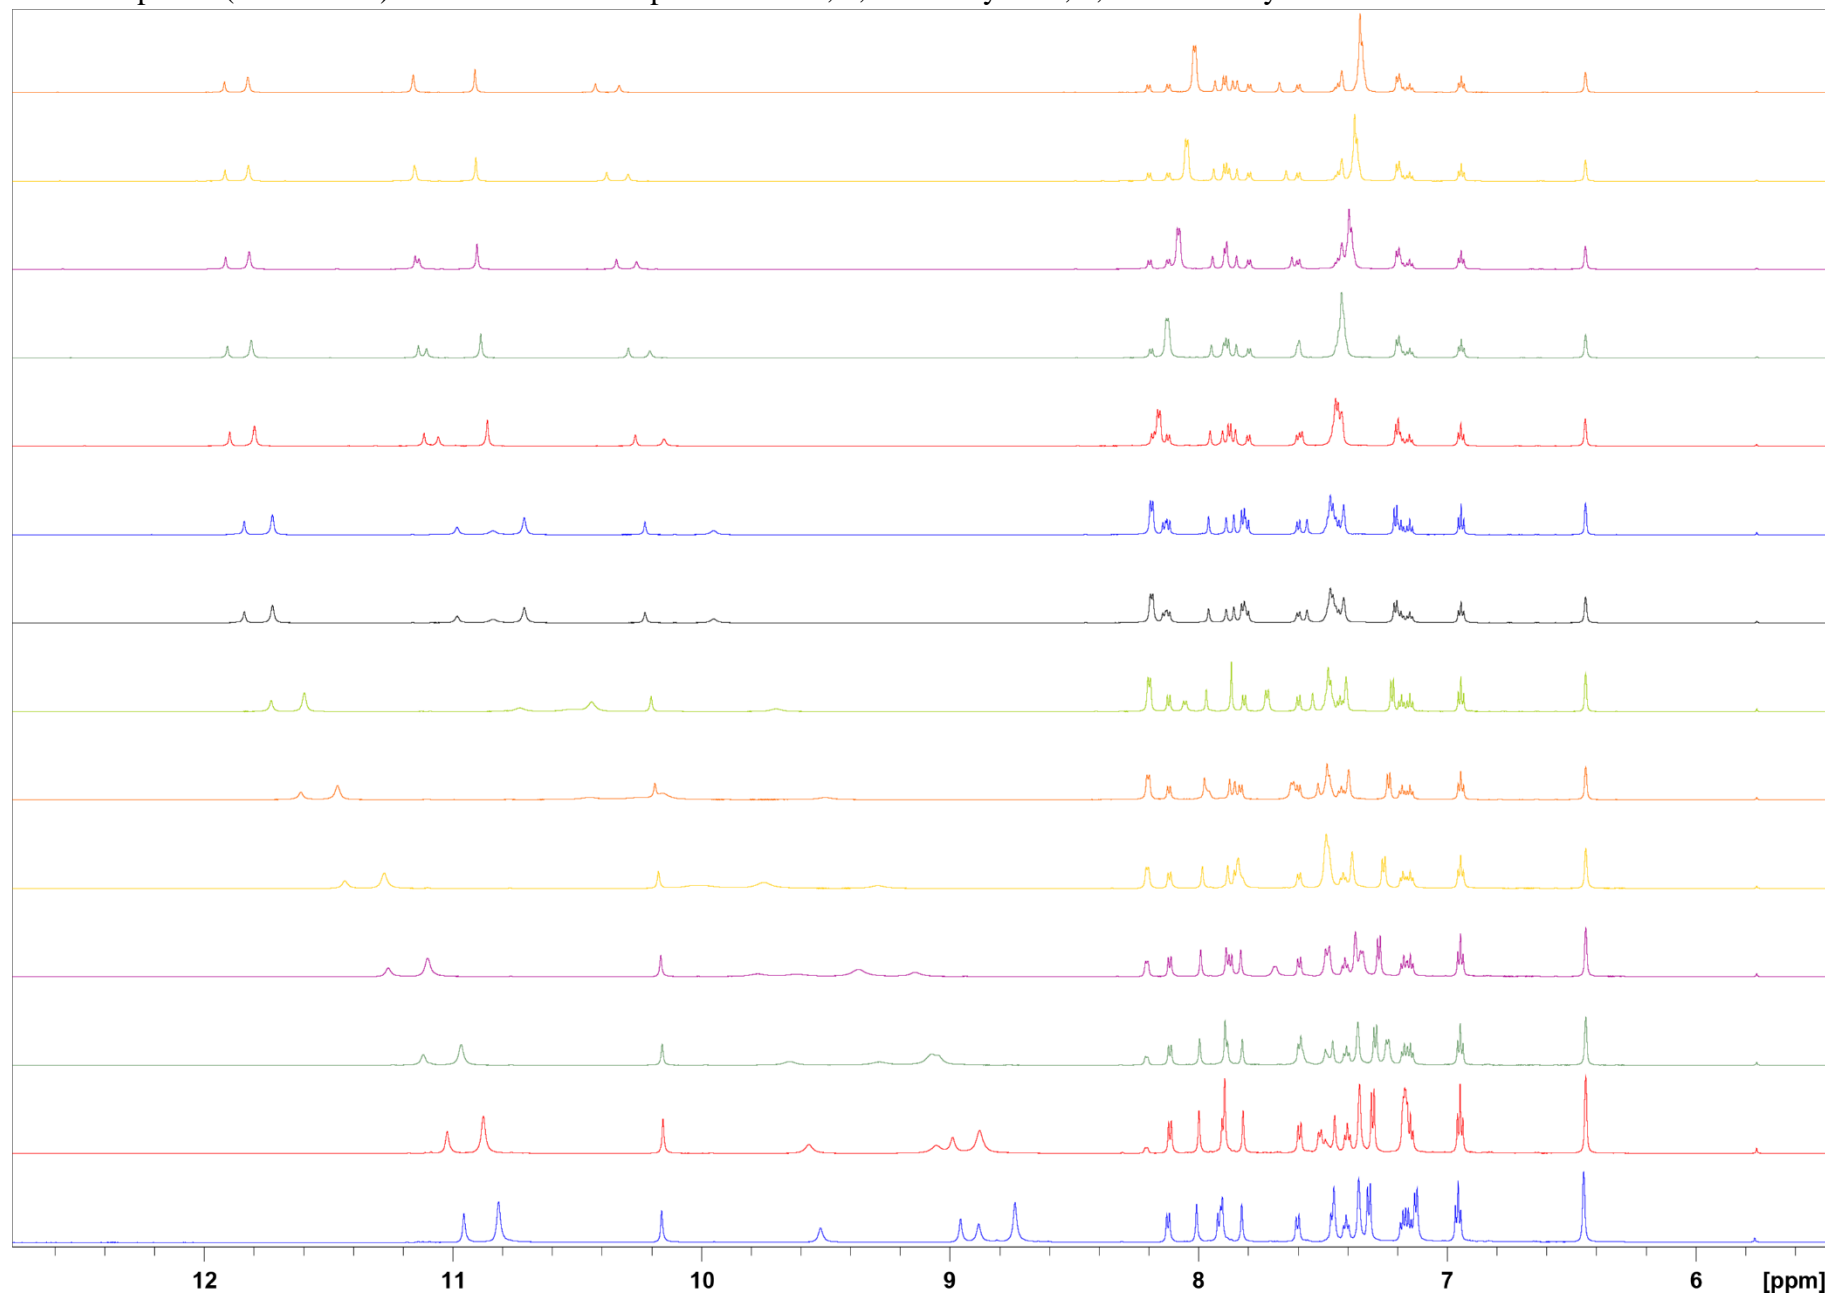

Stacked  $^1\text{H}$  NMR spectra (700.1 MHz) of a mixture of receptors **MC005**; 1,3-diindolylurea; 1,3-dicarbazolylurea + TBA-benzoate

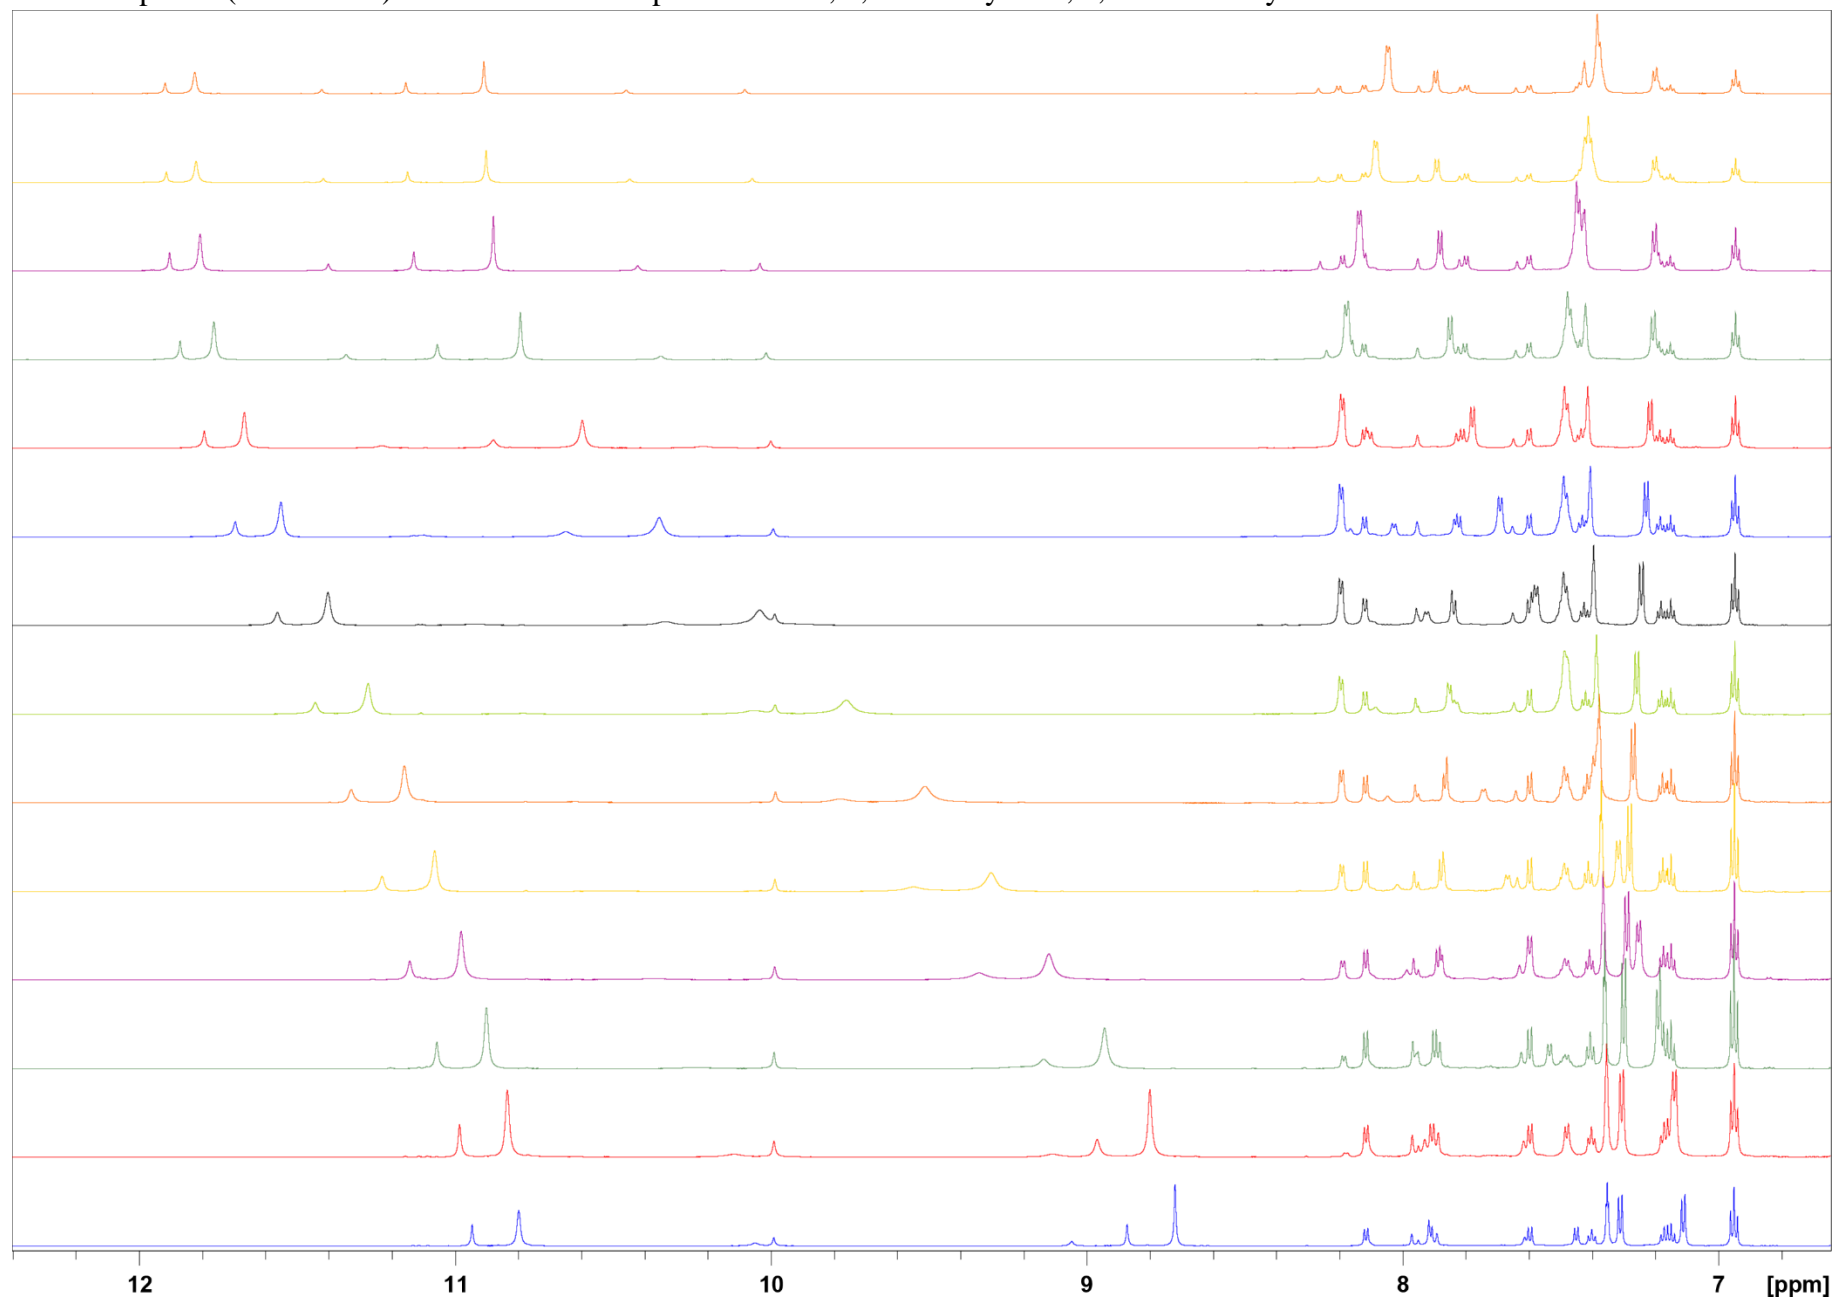

Stacked  $^1\text{H}$  NMR spectra (700.1 MHz) of a mixture of receptors **MC006**; 1,3-diindolylurea; 1,3-dicarbazolylurea + TBA-benzoate

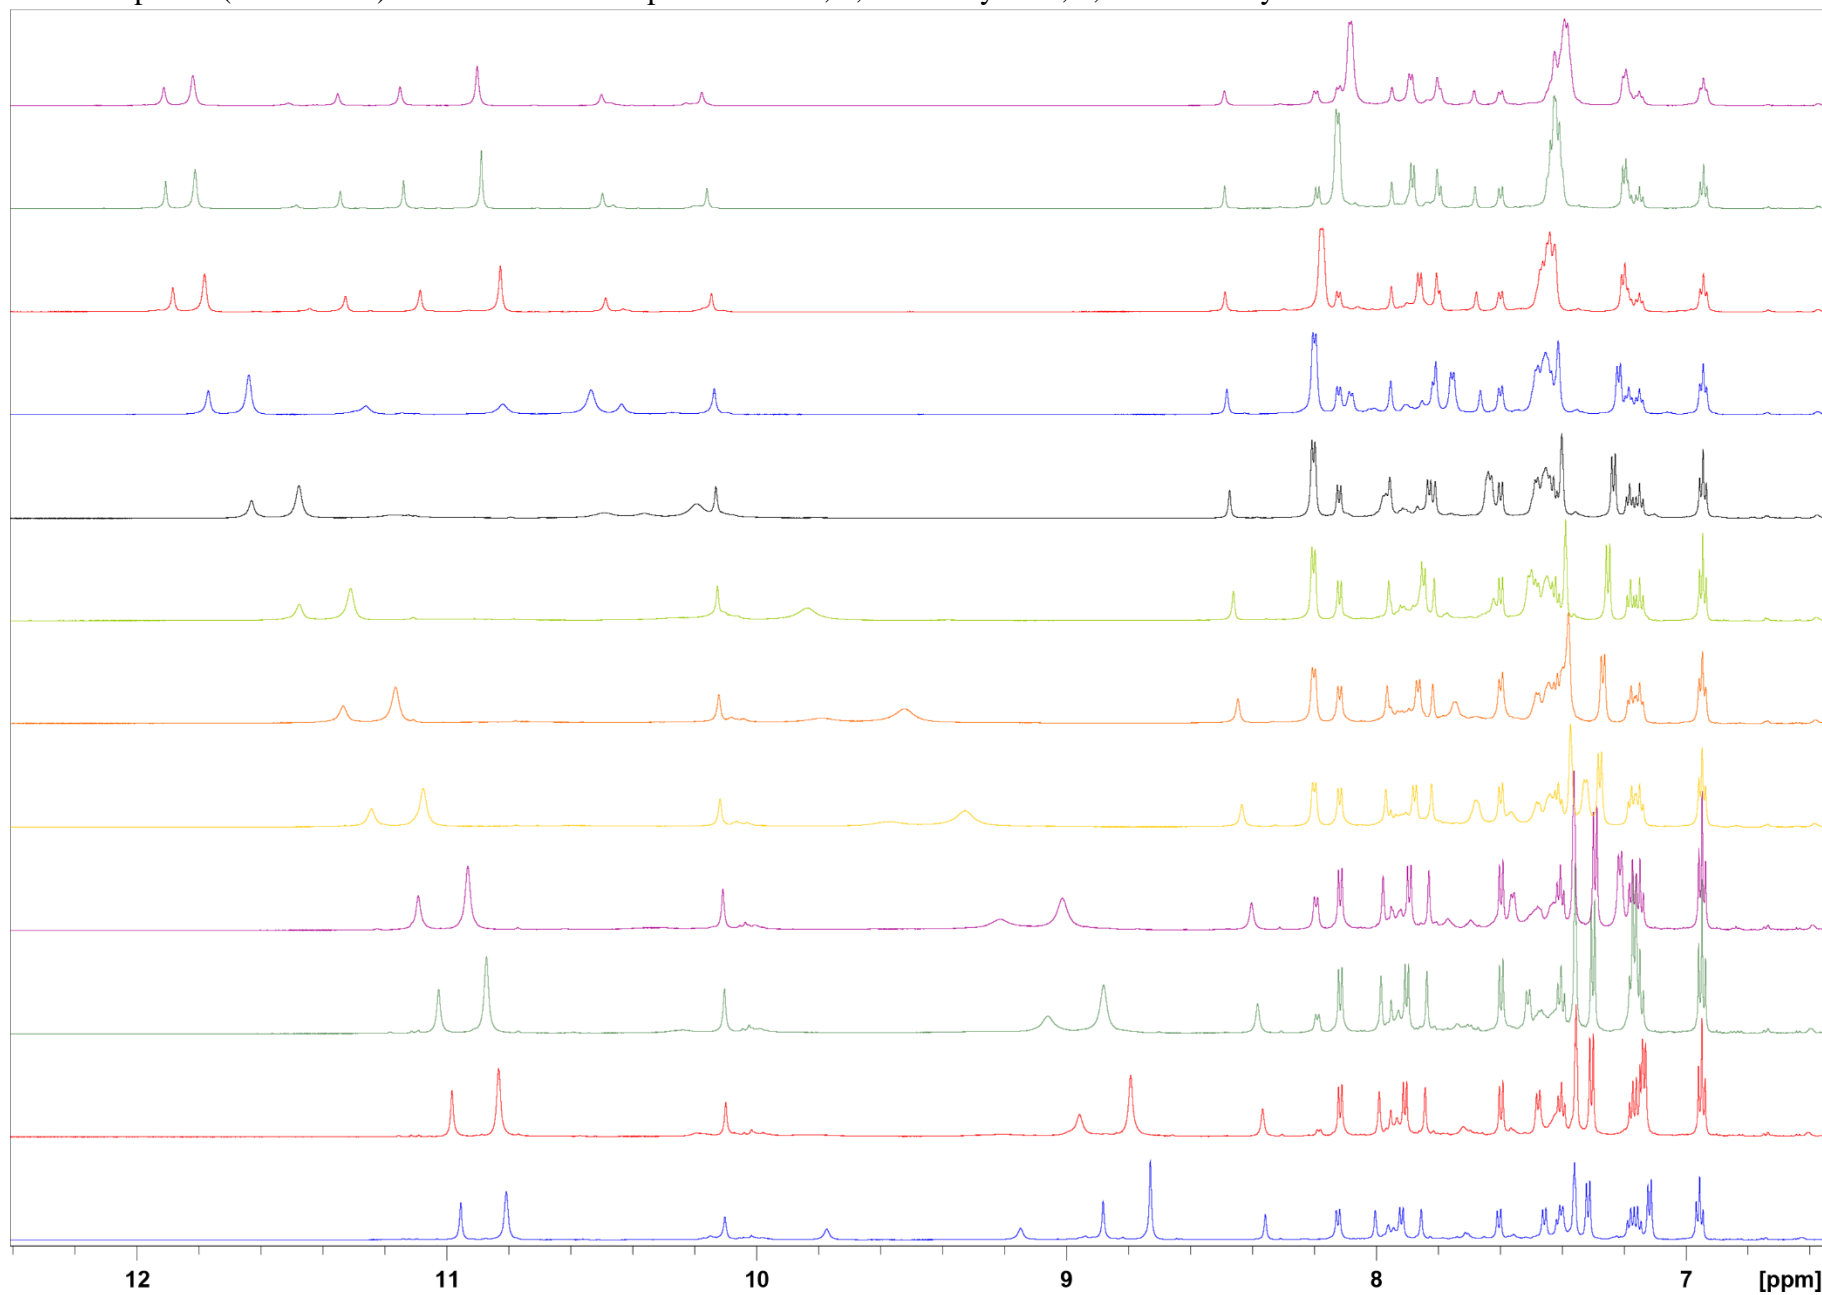

Stacked  $^1\text{H}$  NMR spectra (700.1 MHz) of a mixture of receptors **MC007**; 1,3-diindolylurea; 1,3-dicarbazolylurea + TBA-benzoate

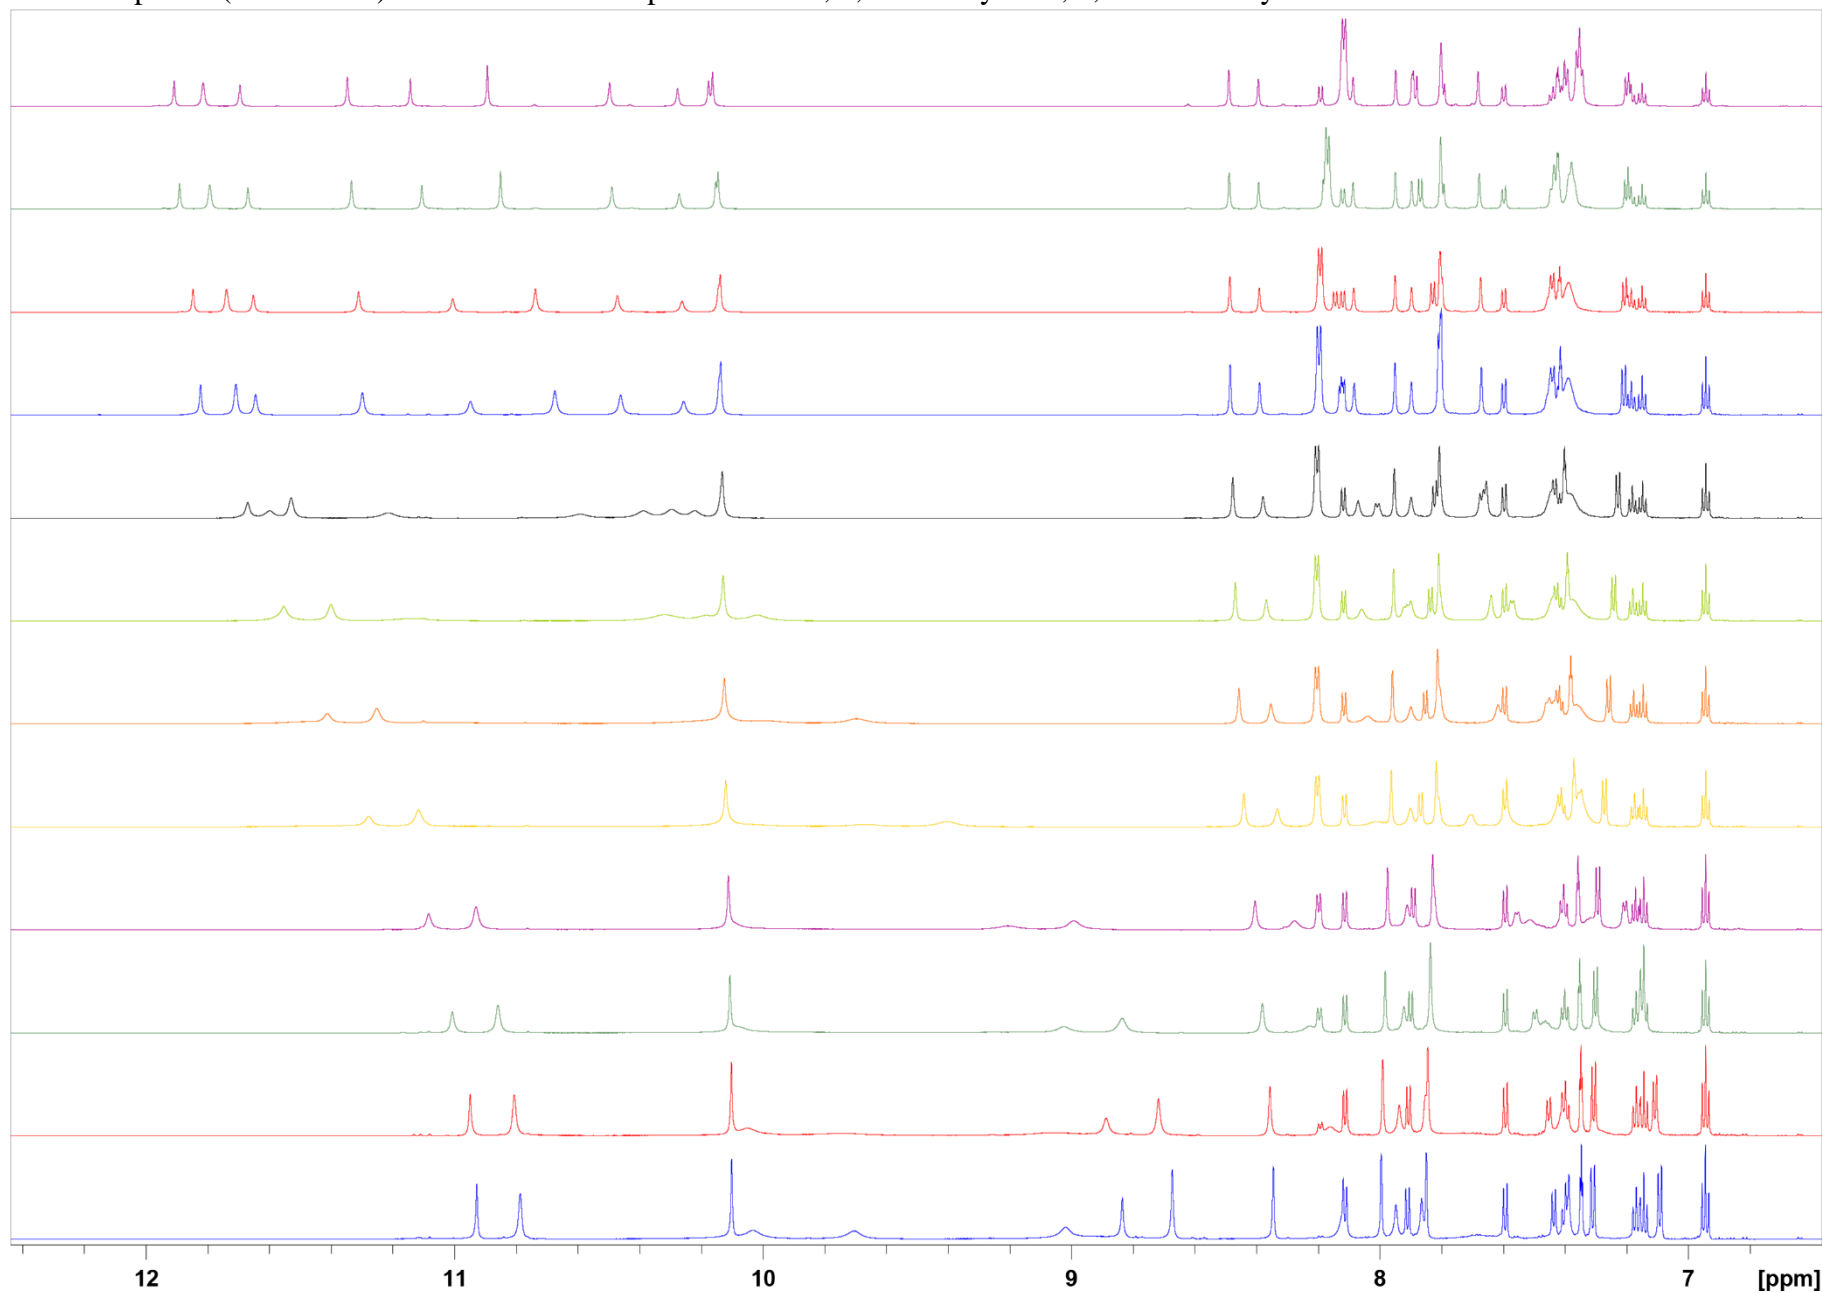

Stacked  $^1\text{H}$  NMR spectra (700.1 MHz) of a mixture of receptors **MC008**; 1,3-diindolylurea; 1,3-dicarbazolylurea + TBA-benzoate

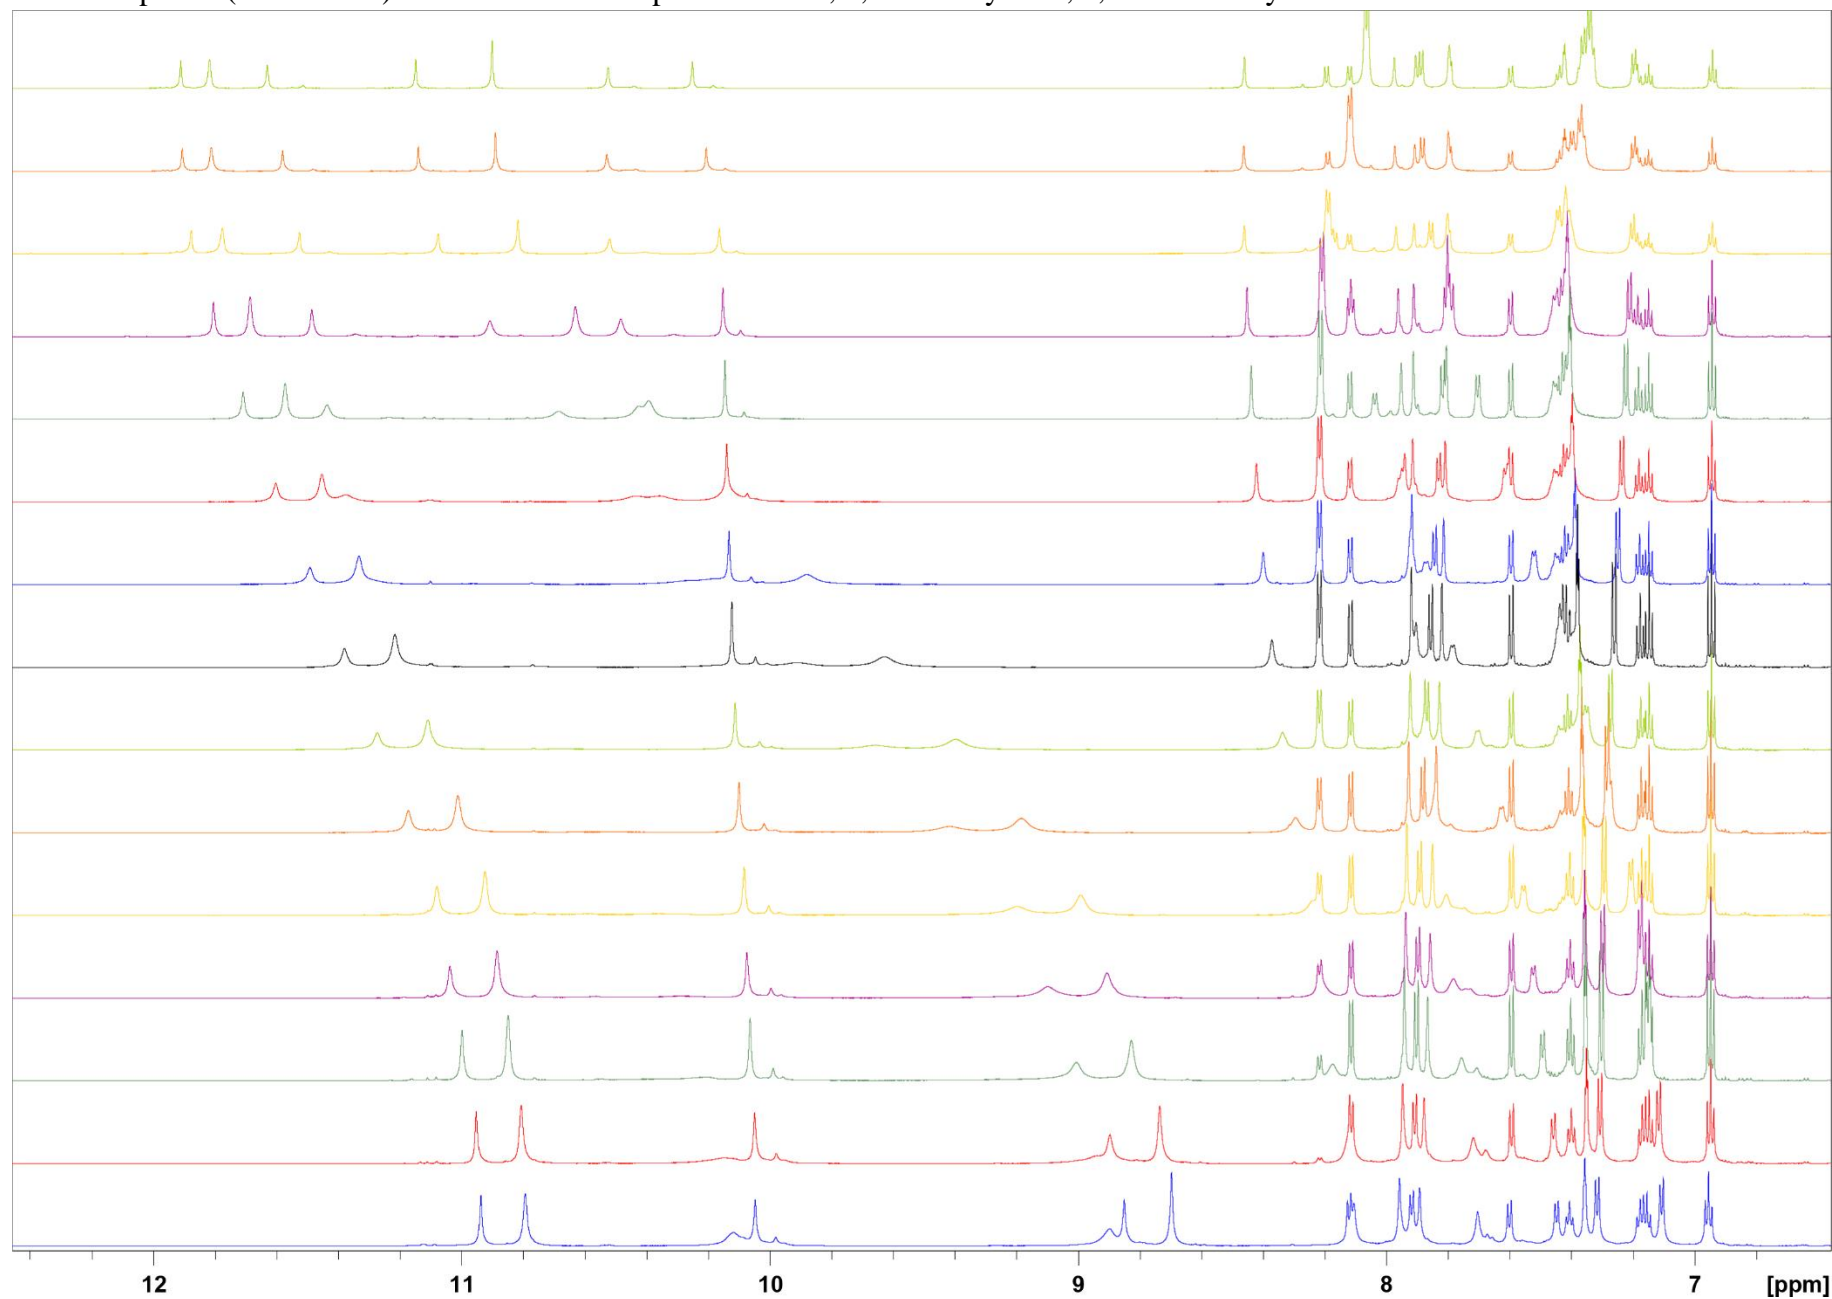



Stacked  $^1\text{H}$  NMR spectra (700.1 MHz) of a mixture of receptors **MC009**; 1,3-diindolylurea; 1,3-dicarbazolylurea + TBA-benzoate

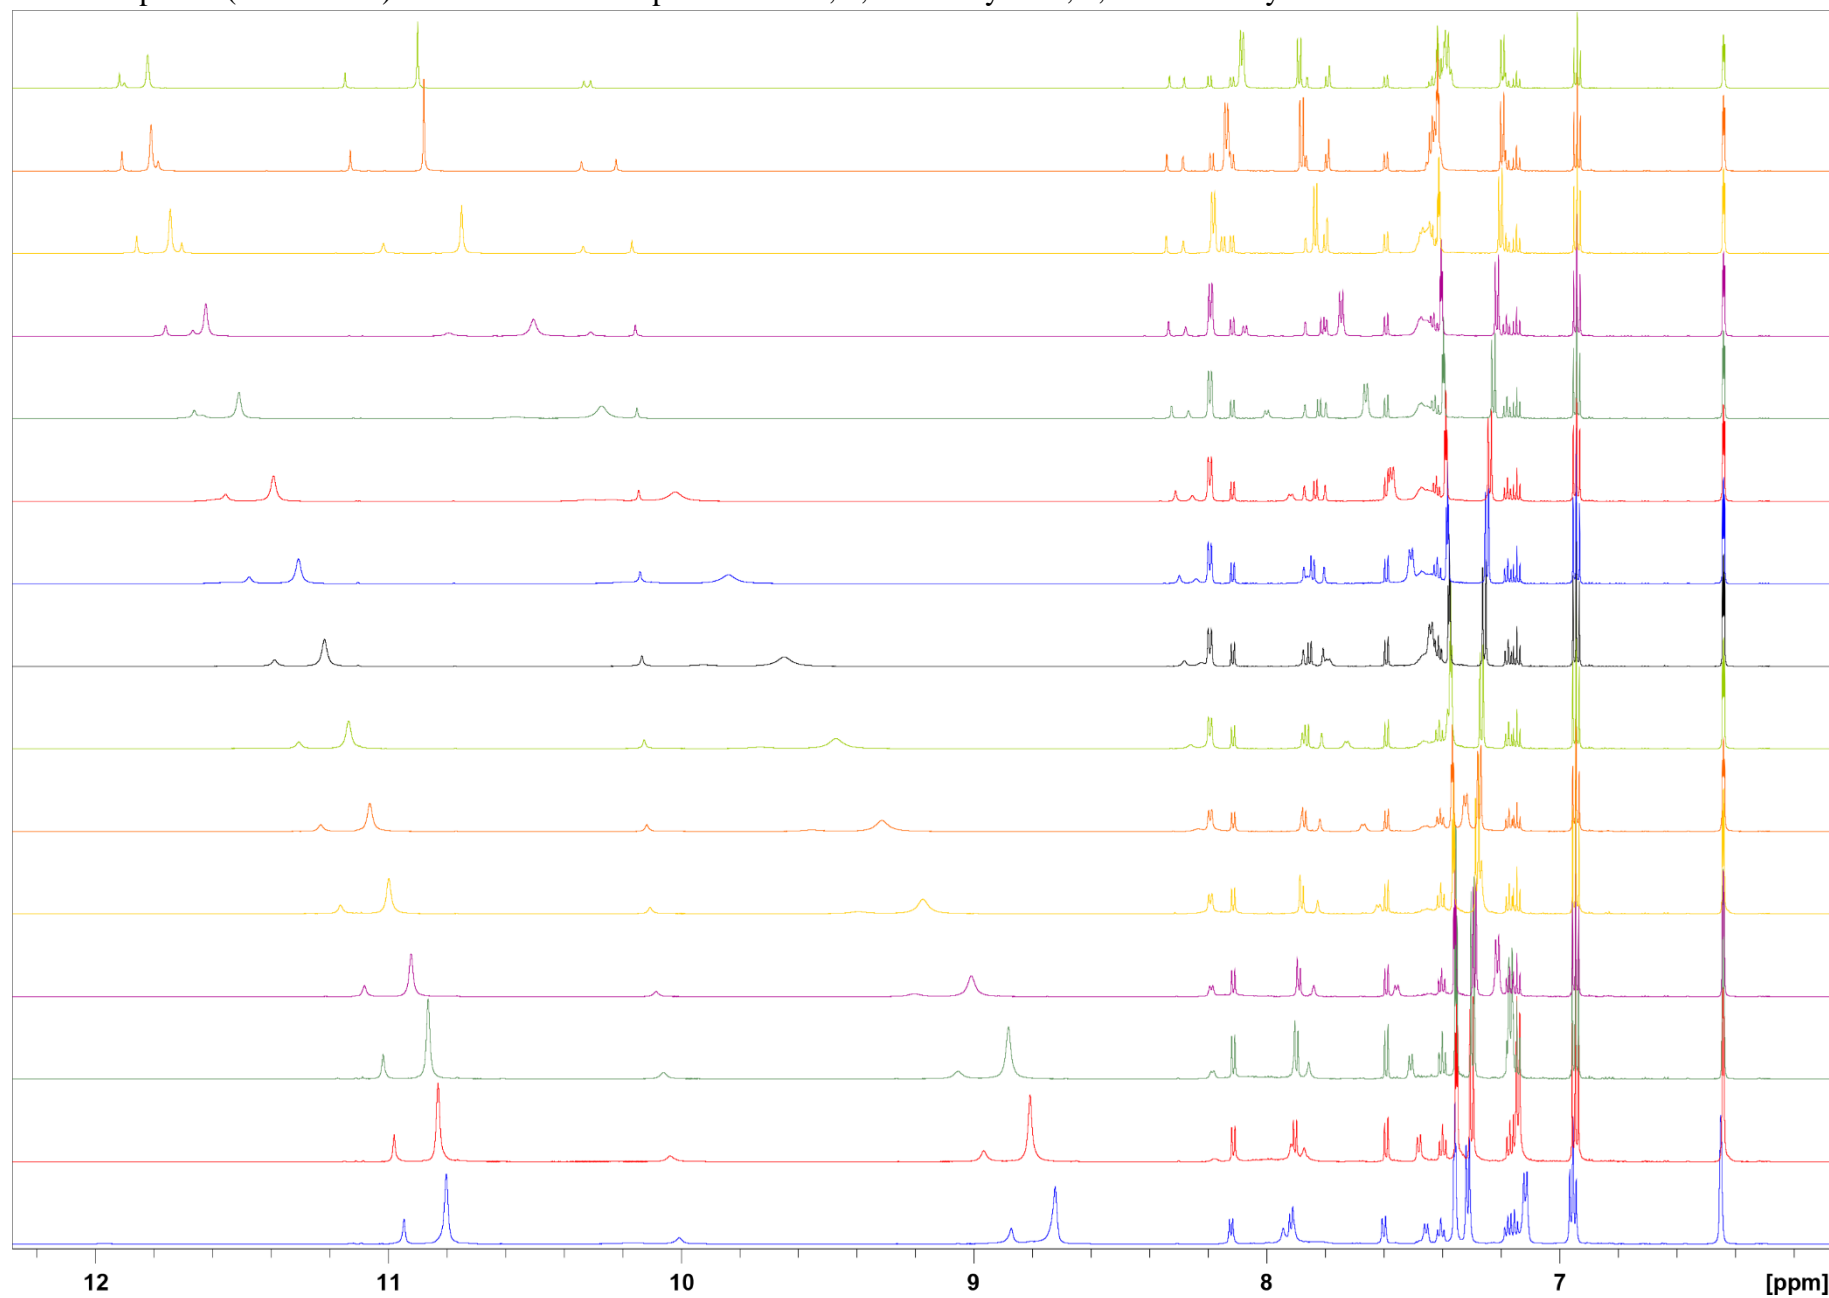

Stacked  $^1\text{H}$  NMR spectra (700.1 MHz) of a mixture of receptors **MC010**; 1,3-diindolylurea; 1,3-dicarbazolylurea + TBA-benzoate

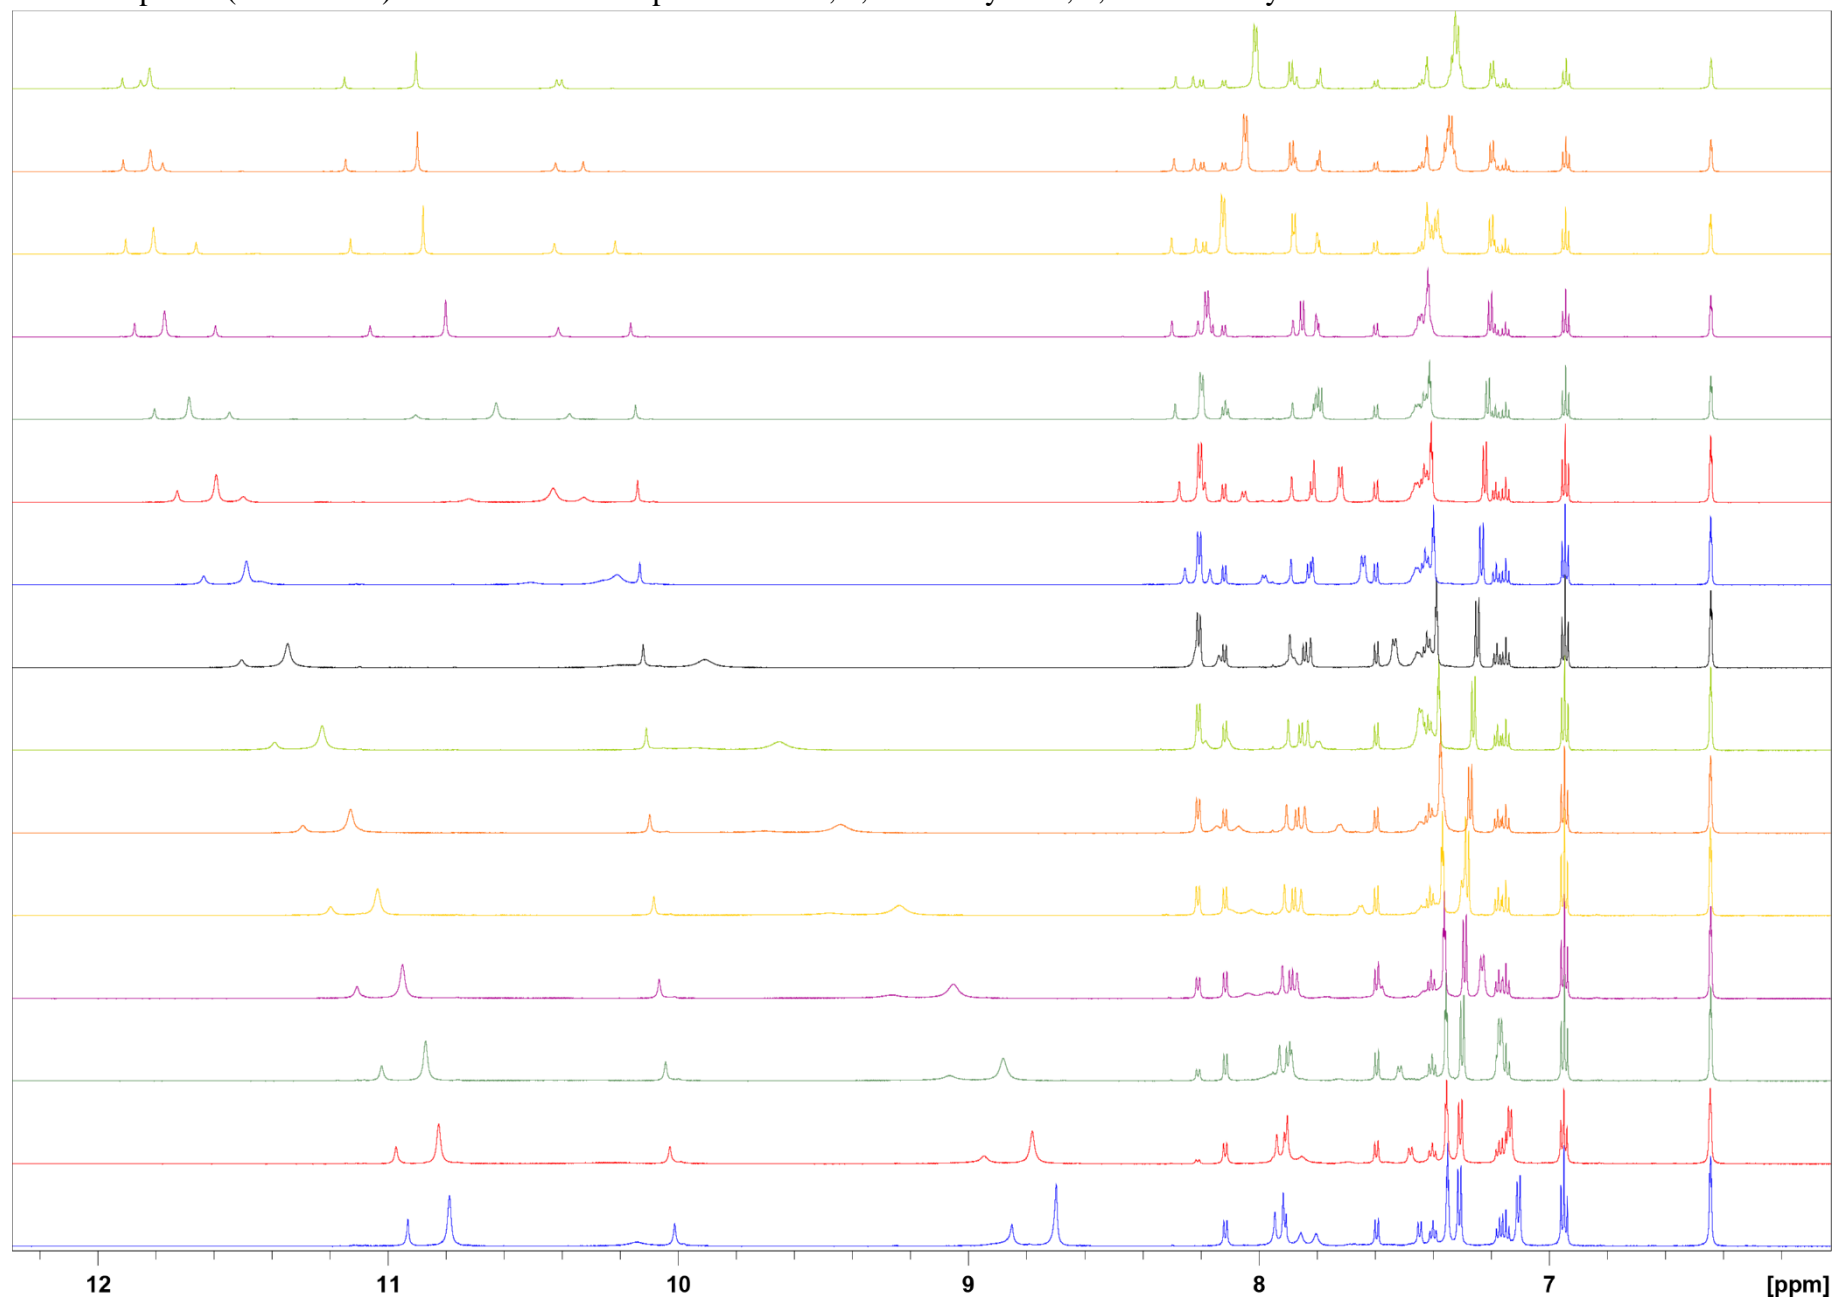

Stacked  $^1\text{H}$  NMR spectra (700.1 MHz) of a mixture of receptors **MC011**; 1,3-diindolylurea; 1,3-dicarbazolylurea + TBA-benzoate

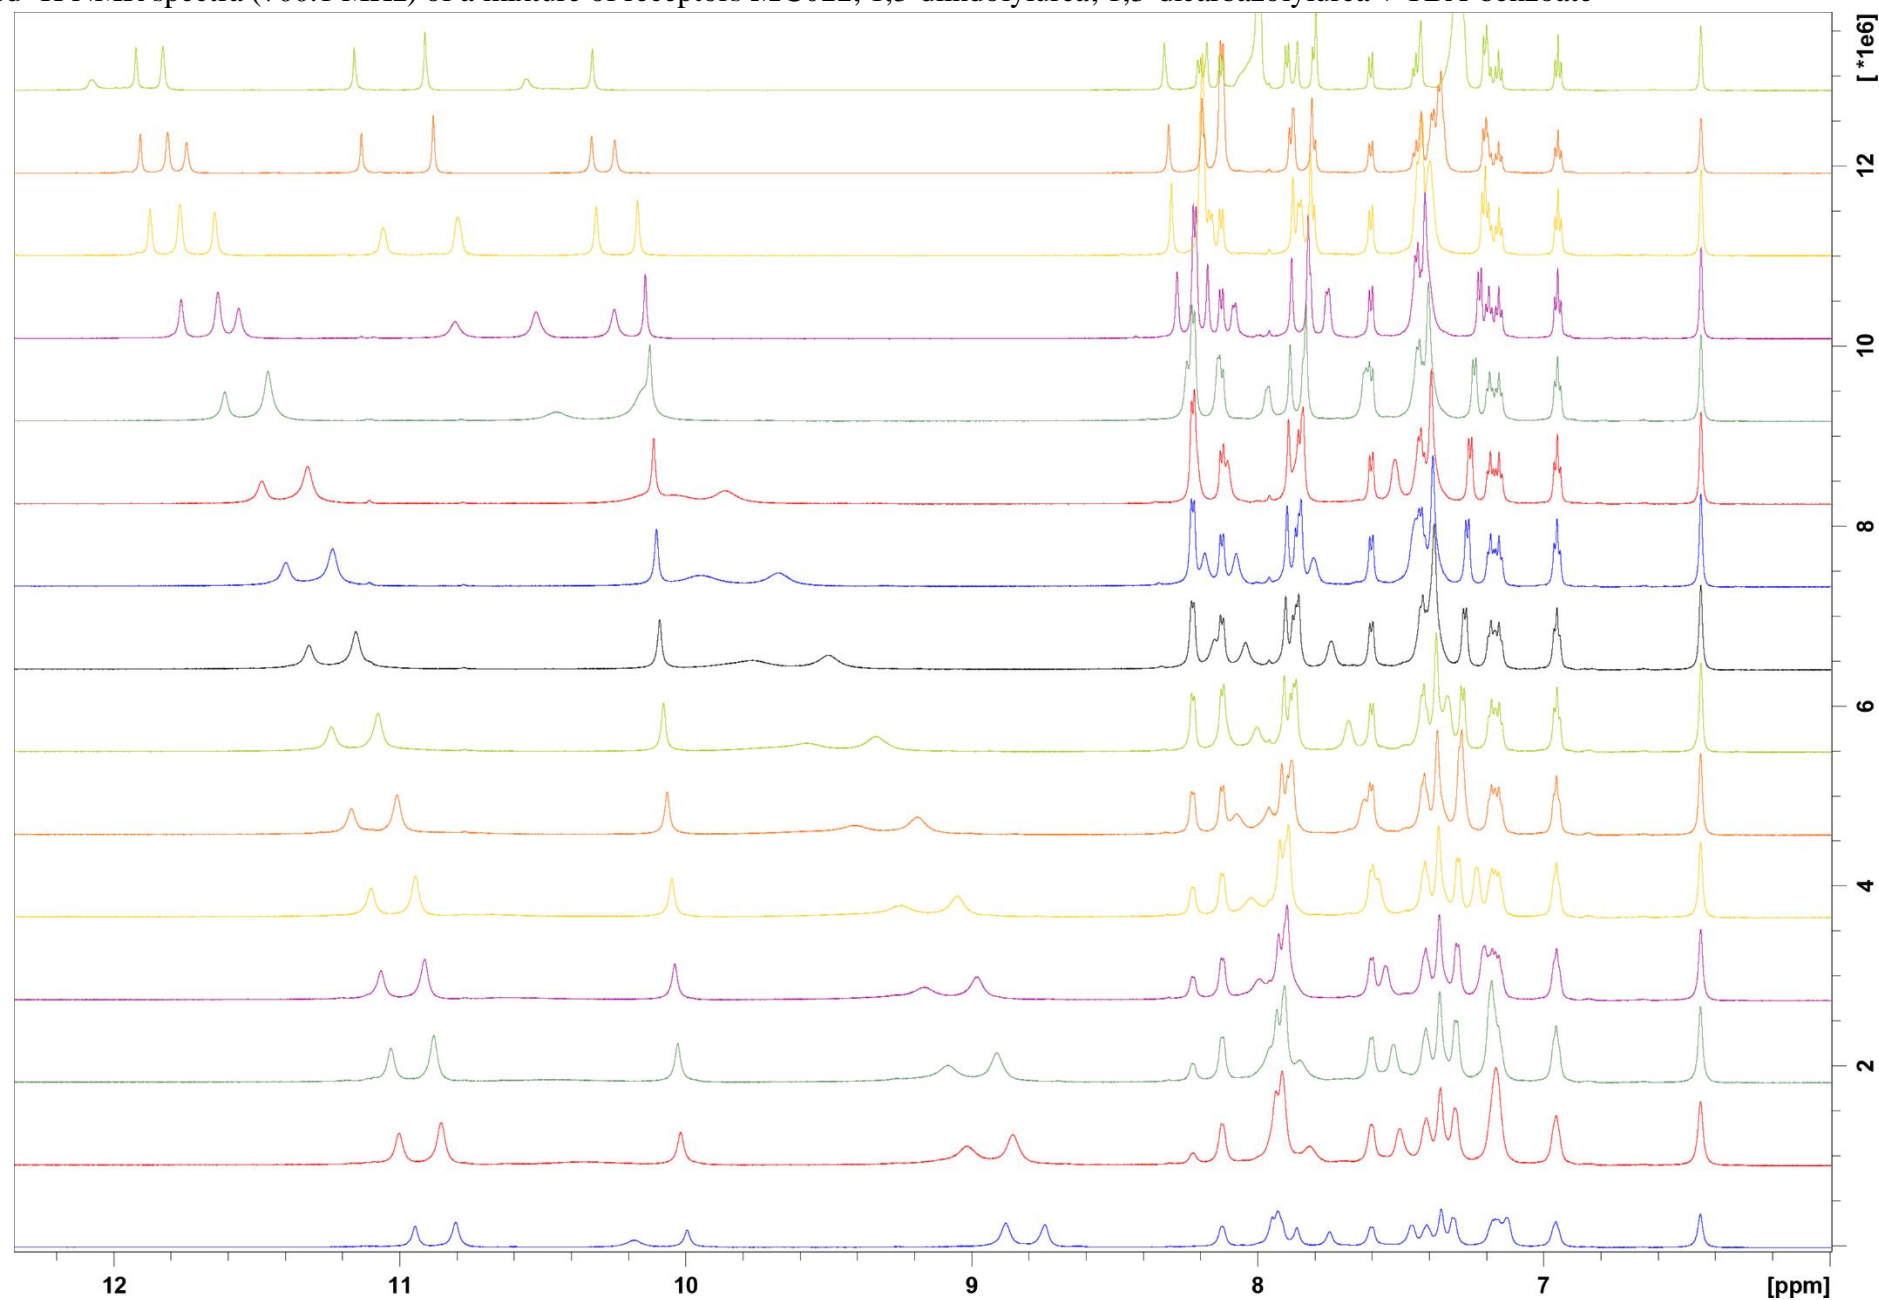

Stacked  $^1\text{H}$  NMR spectra (700.1 MHz) of a mixture of receptors **MC012**; 1,3-diindolylurea; 1,3-dicarbazolylurea + TBA-benzoate

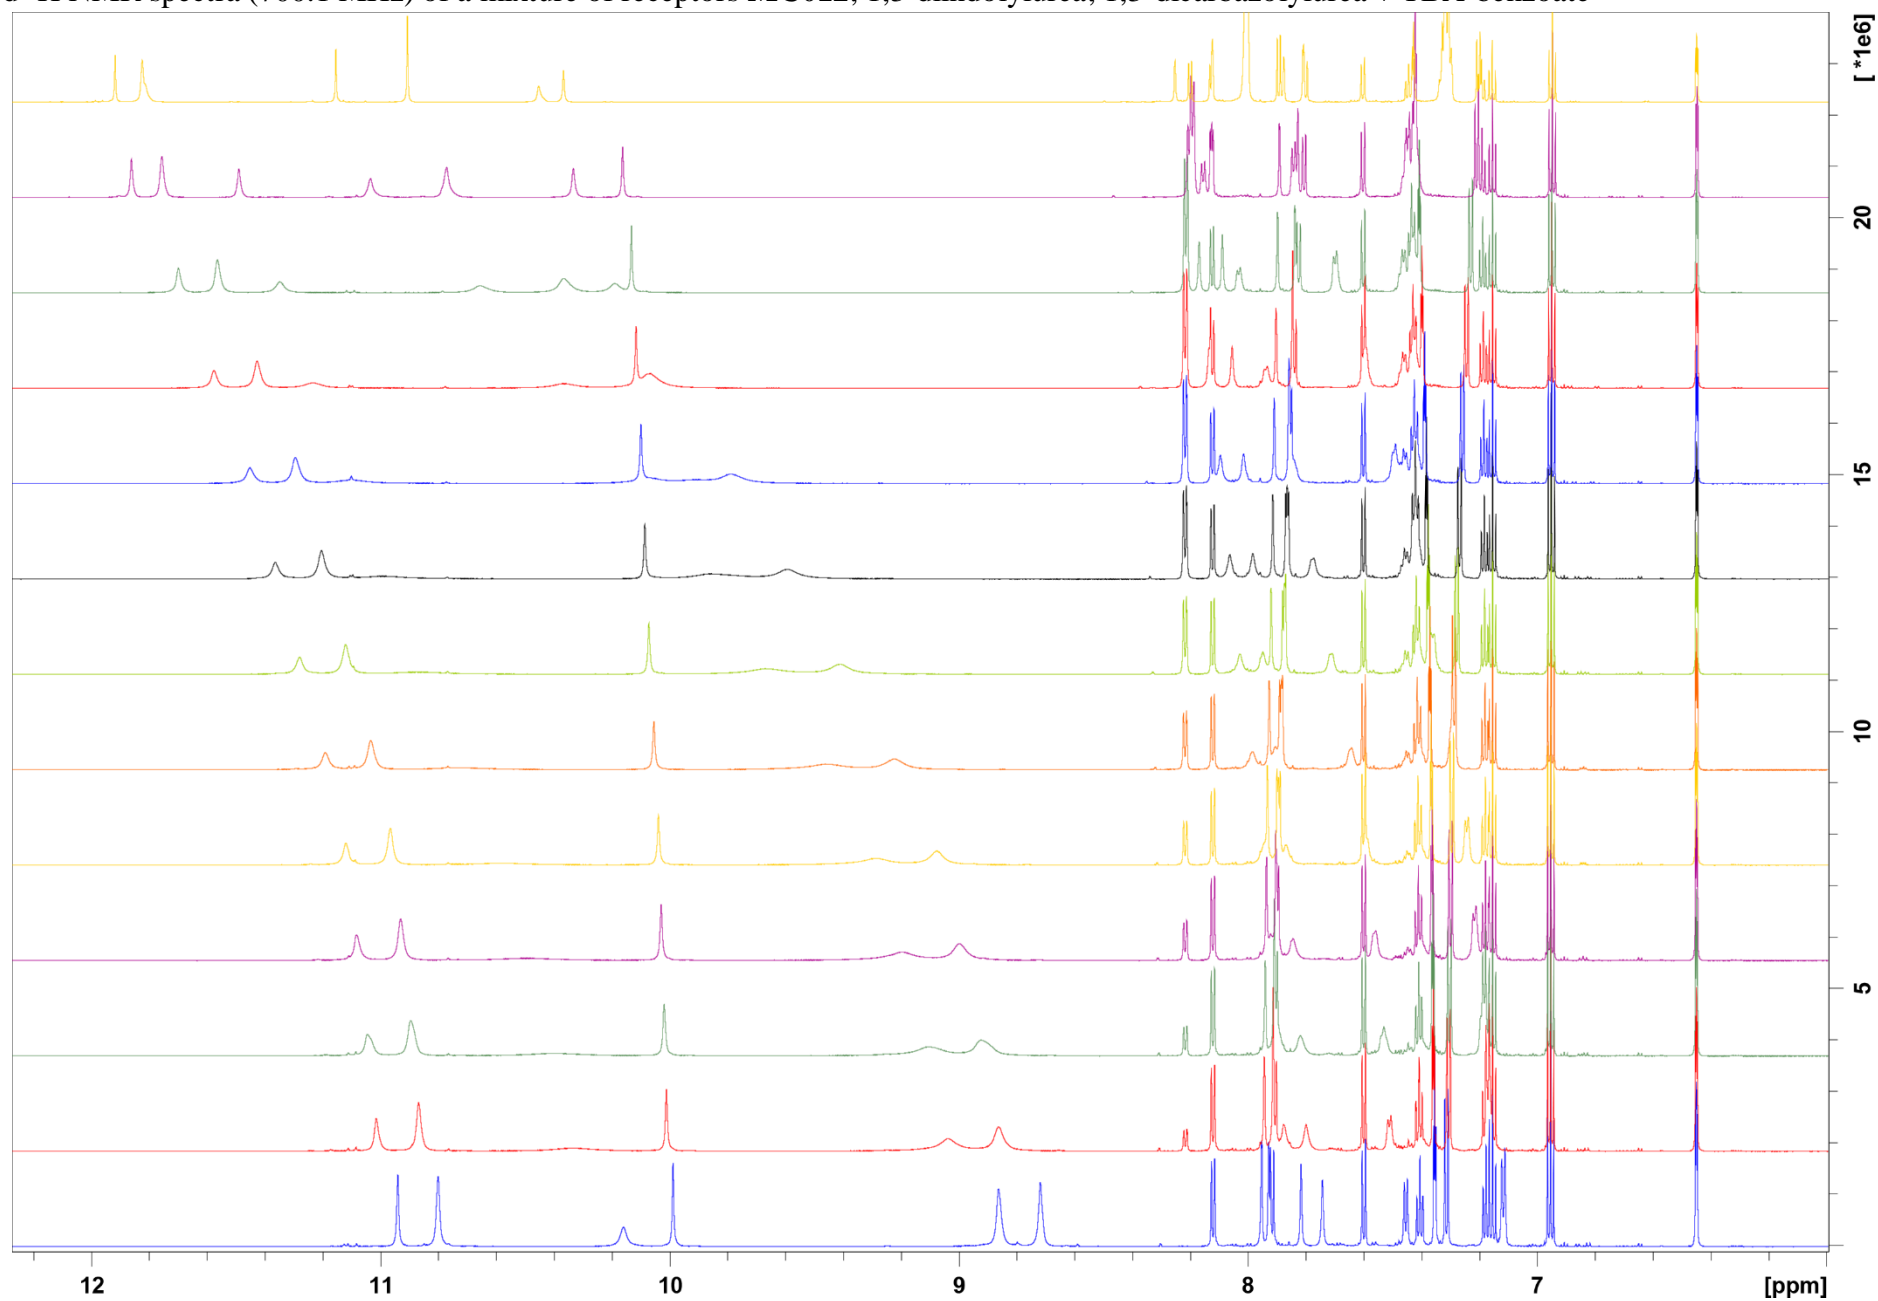

Stacked  $^1\text{H}$  NMR spectra (700.1 MHz) of a mixture of receptors **MC013**; 1,3-diindolylurea; 1,3-dicarbazolylurea + TBA-benzoate

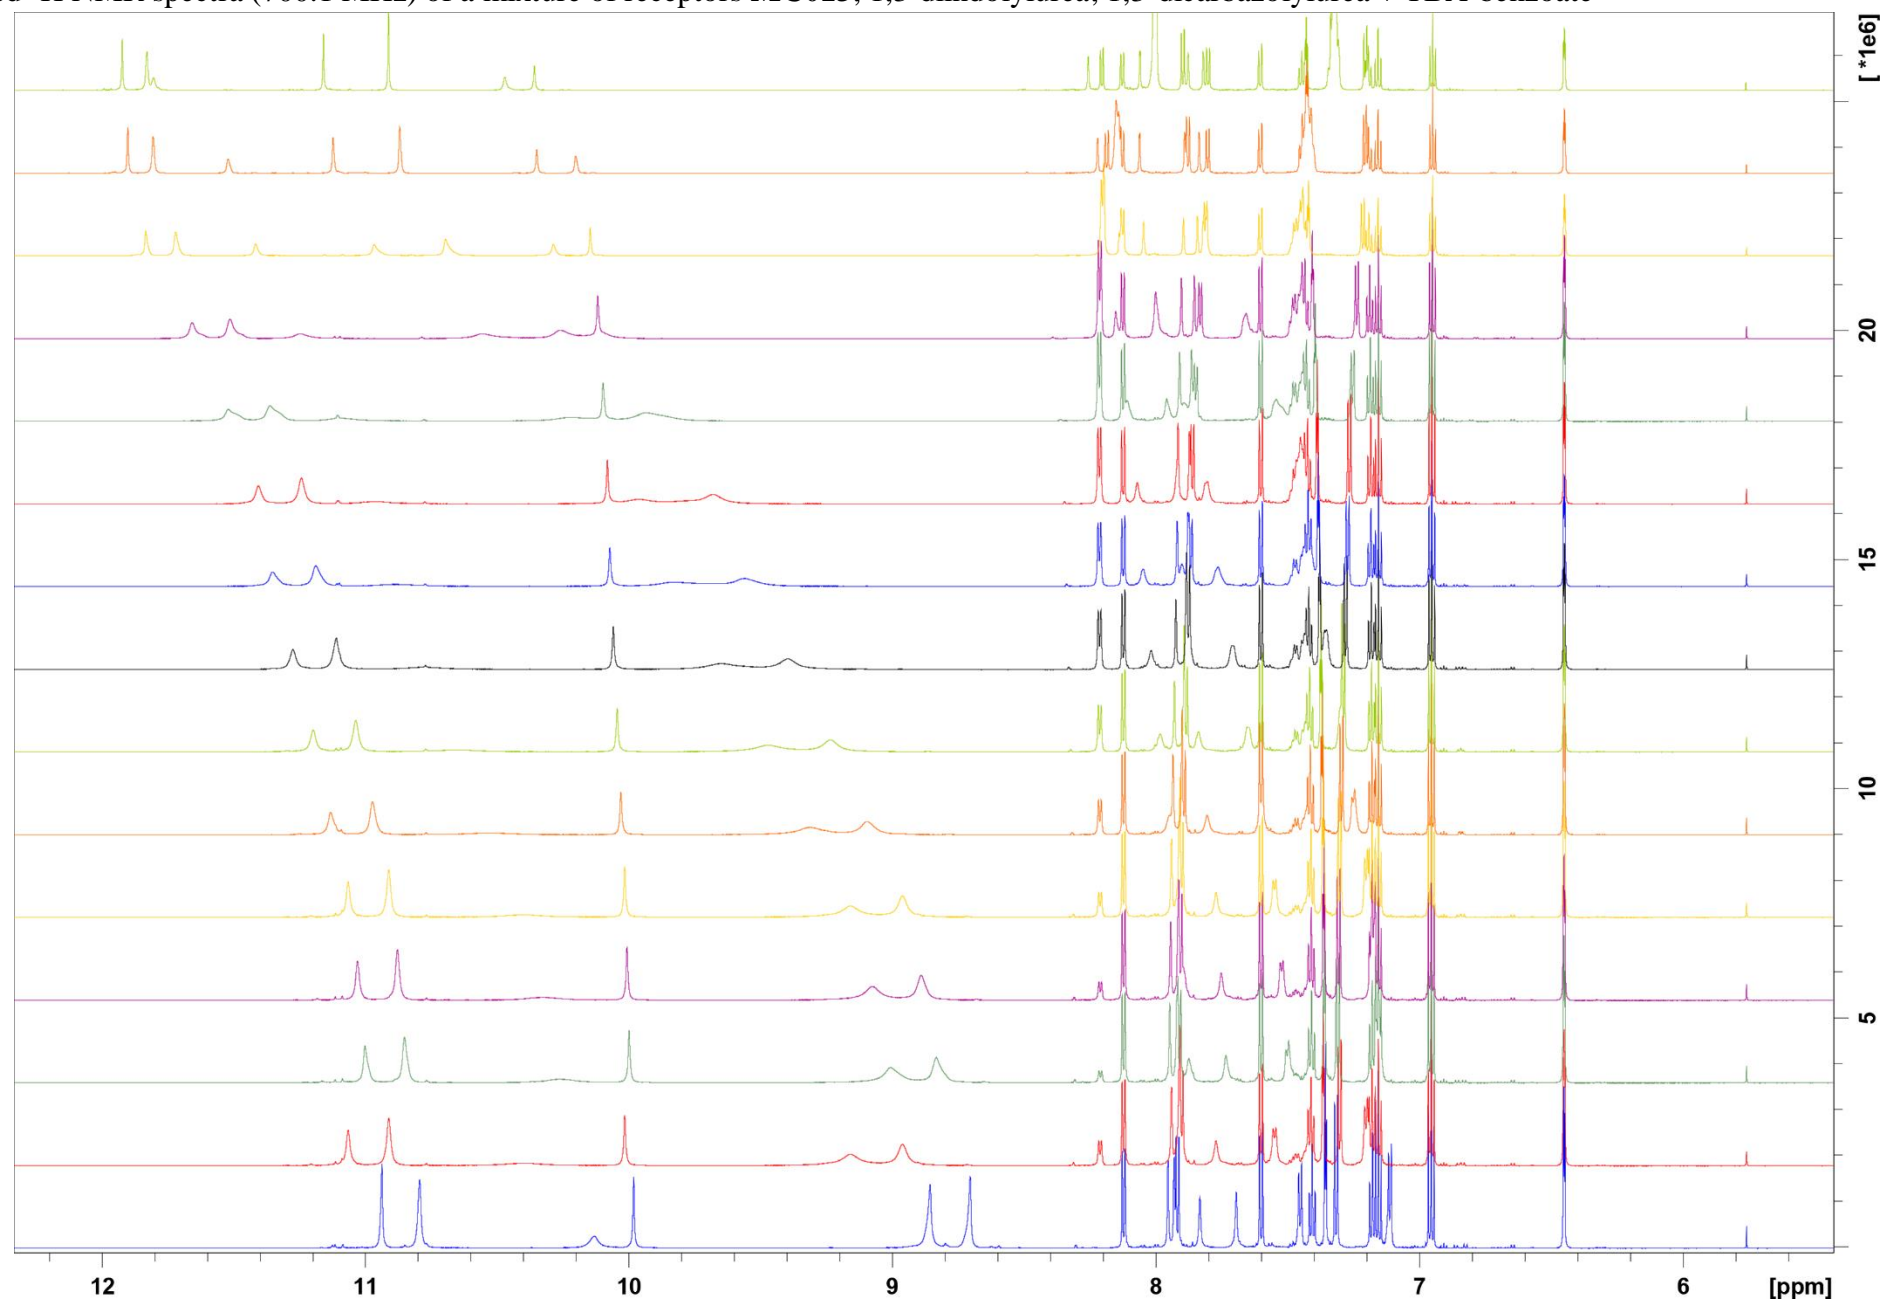

Stacked  $^1\text{H}$  NMR spectra (700.1 MHz) of a mixture of receptors **MC014**; 1,3-diindolylurea; 1,3-dicarbazolylurea + TBA-benzoate

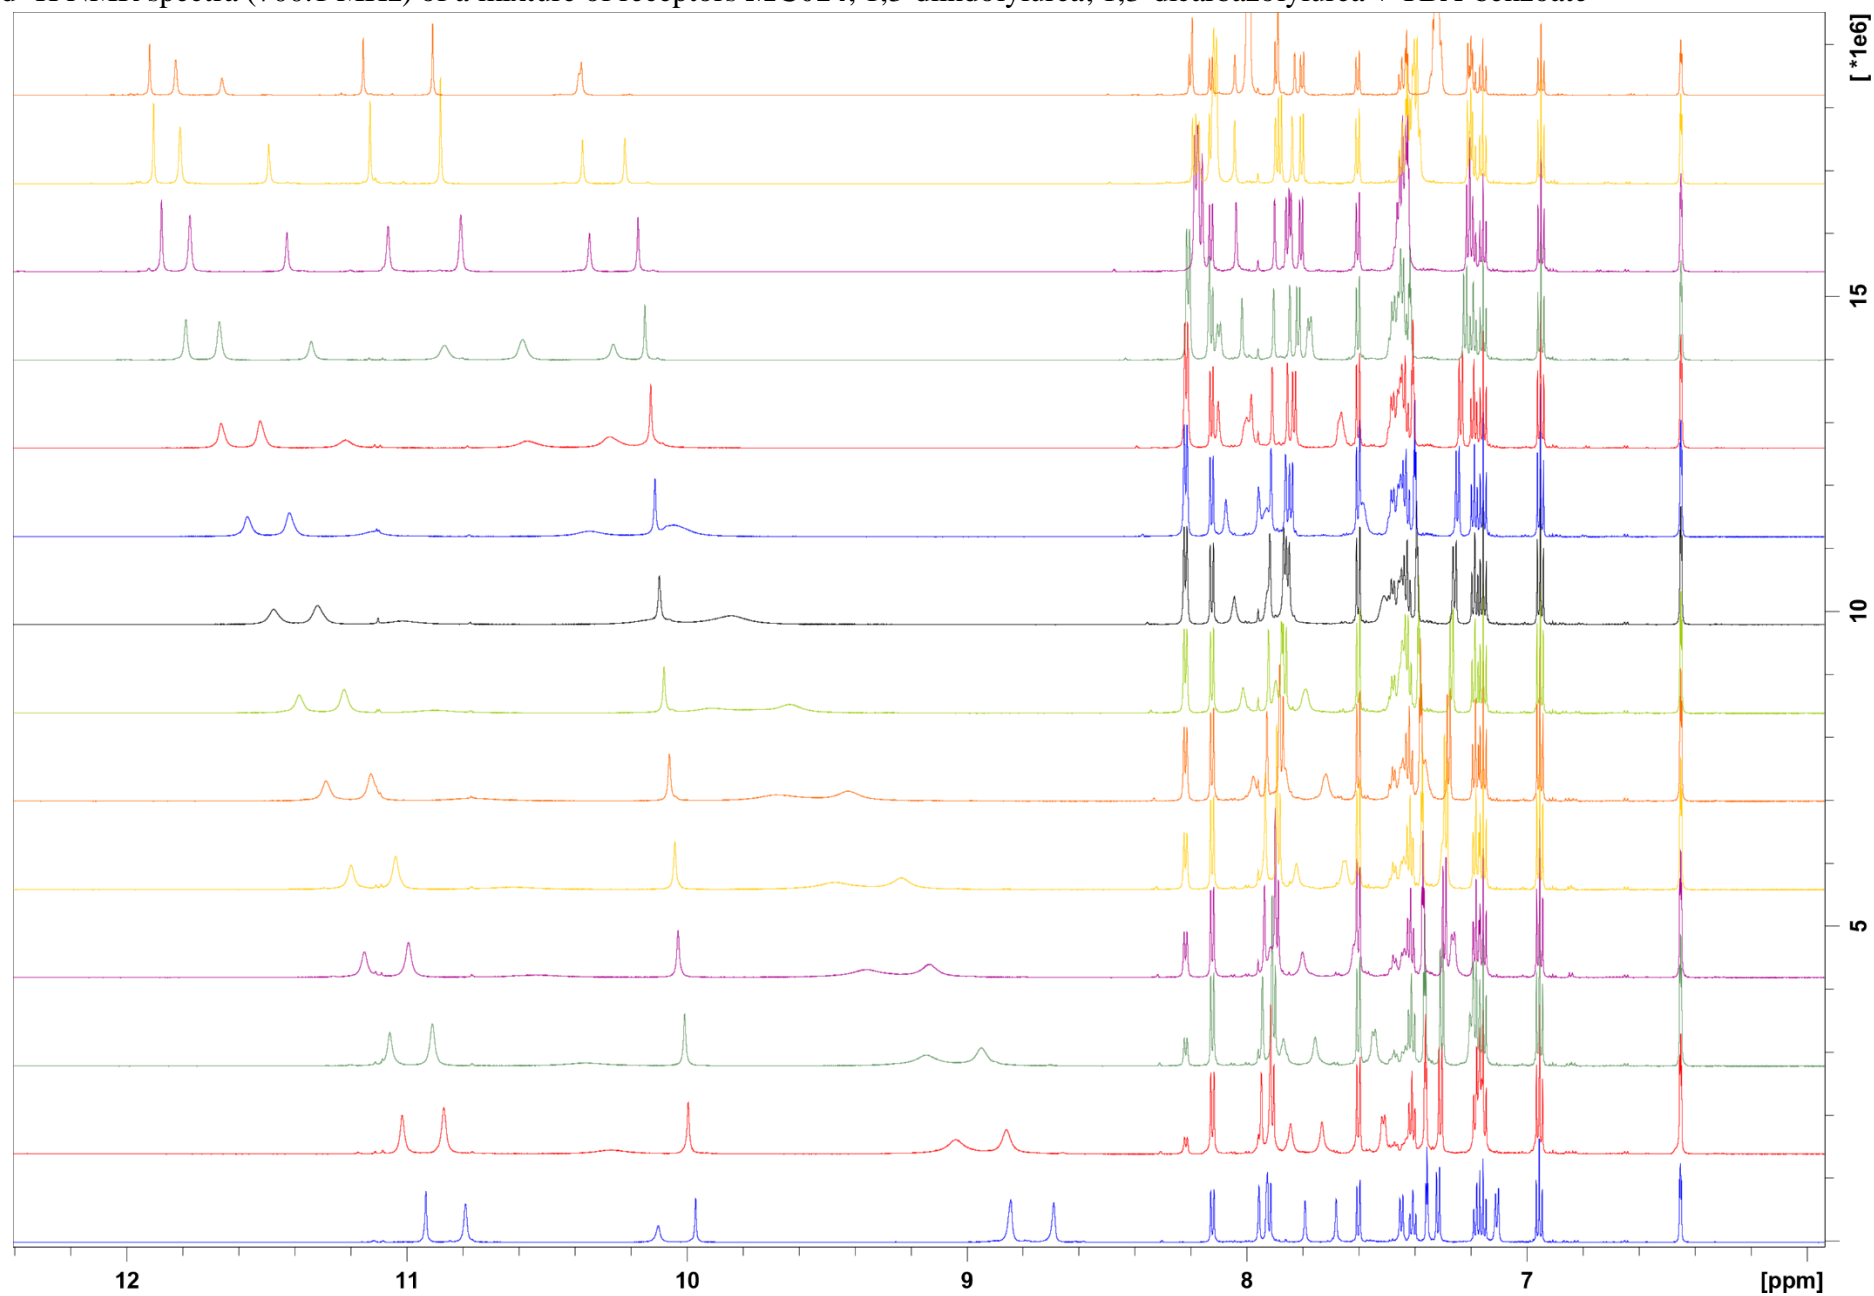

Stacked  $^1\text{H}$  NMR spectra (700.1 MHz) of a mixture of receptors **CZ016**; 2,7-(COOBu) $_2$ -indolocarbazole; 2,9-(COOBu) $_2$ -indolocarbazole + TBA-formate

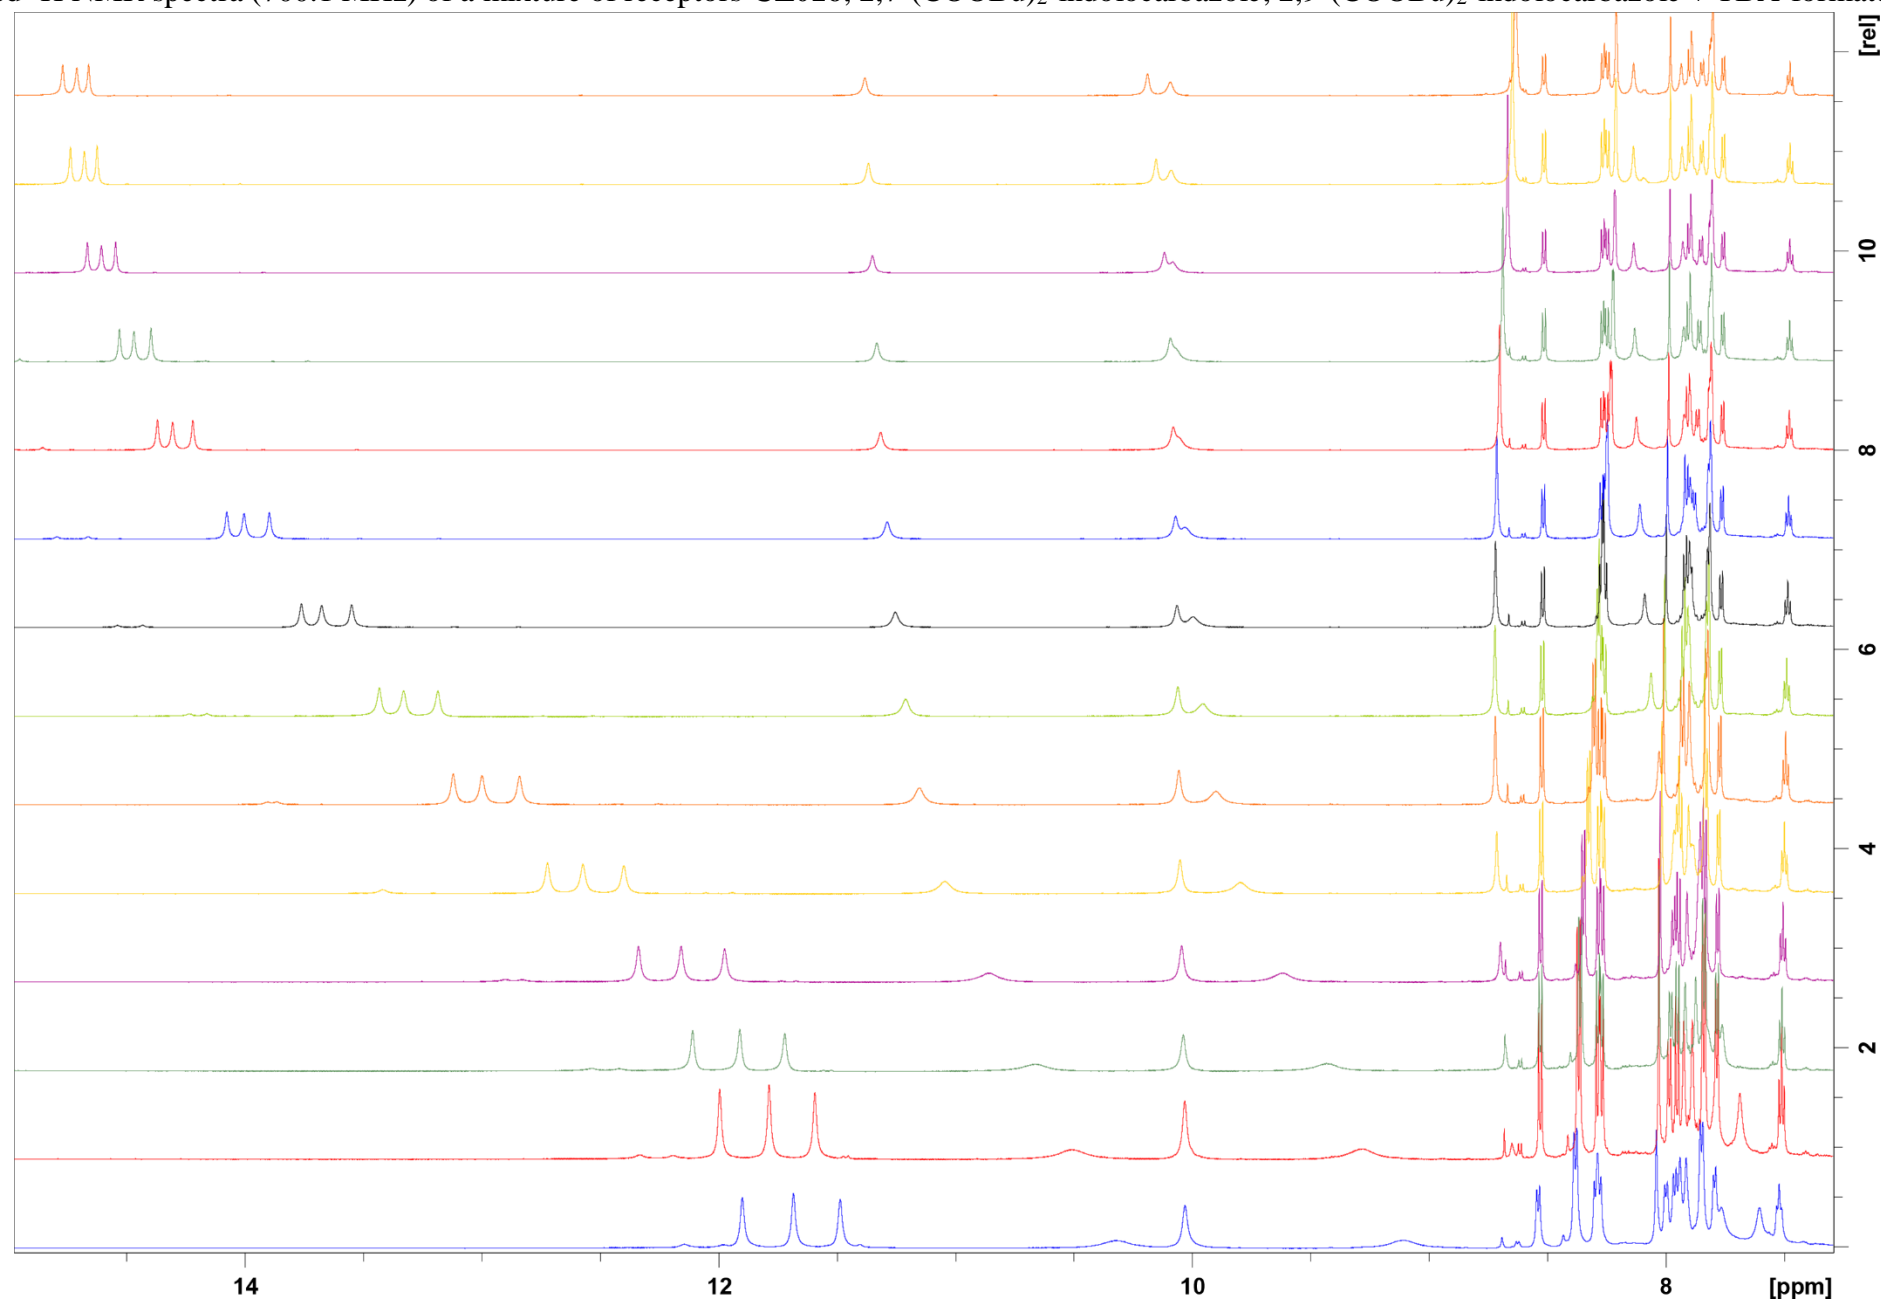

Stacked  $^1\text{H}$  NMR spectra (700.1 MHz) of a mixture of receptors **MC001**; **MC004**; 1,3-diindolylurea + TBA-formate

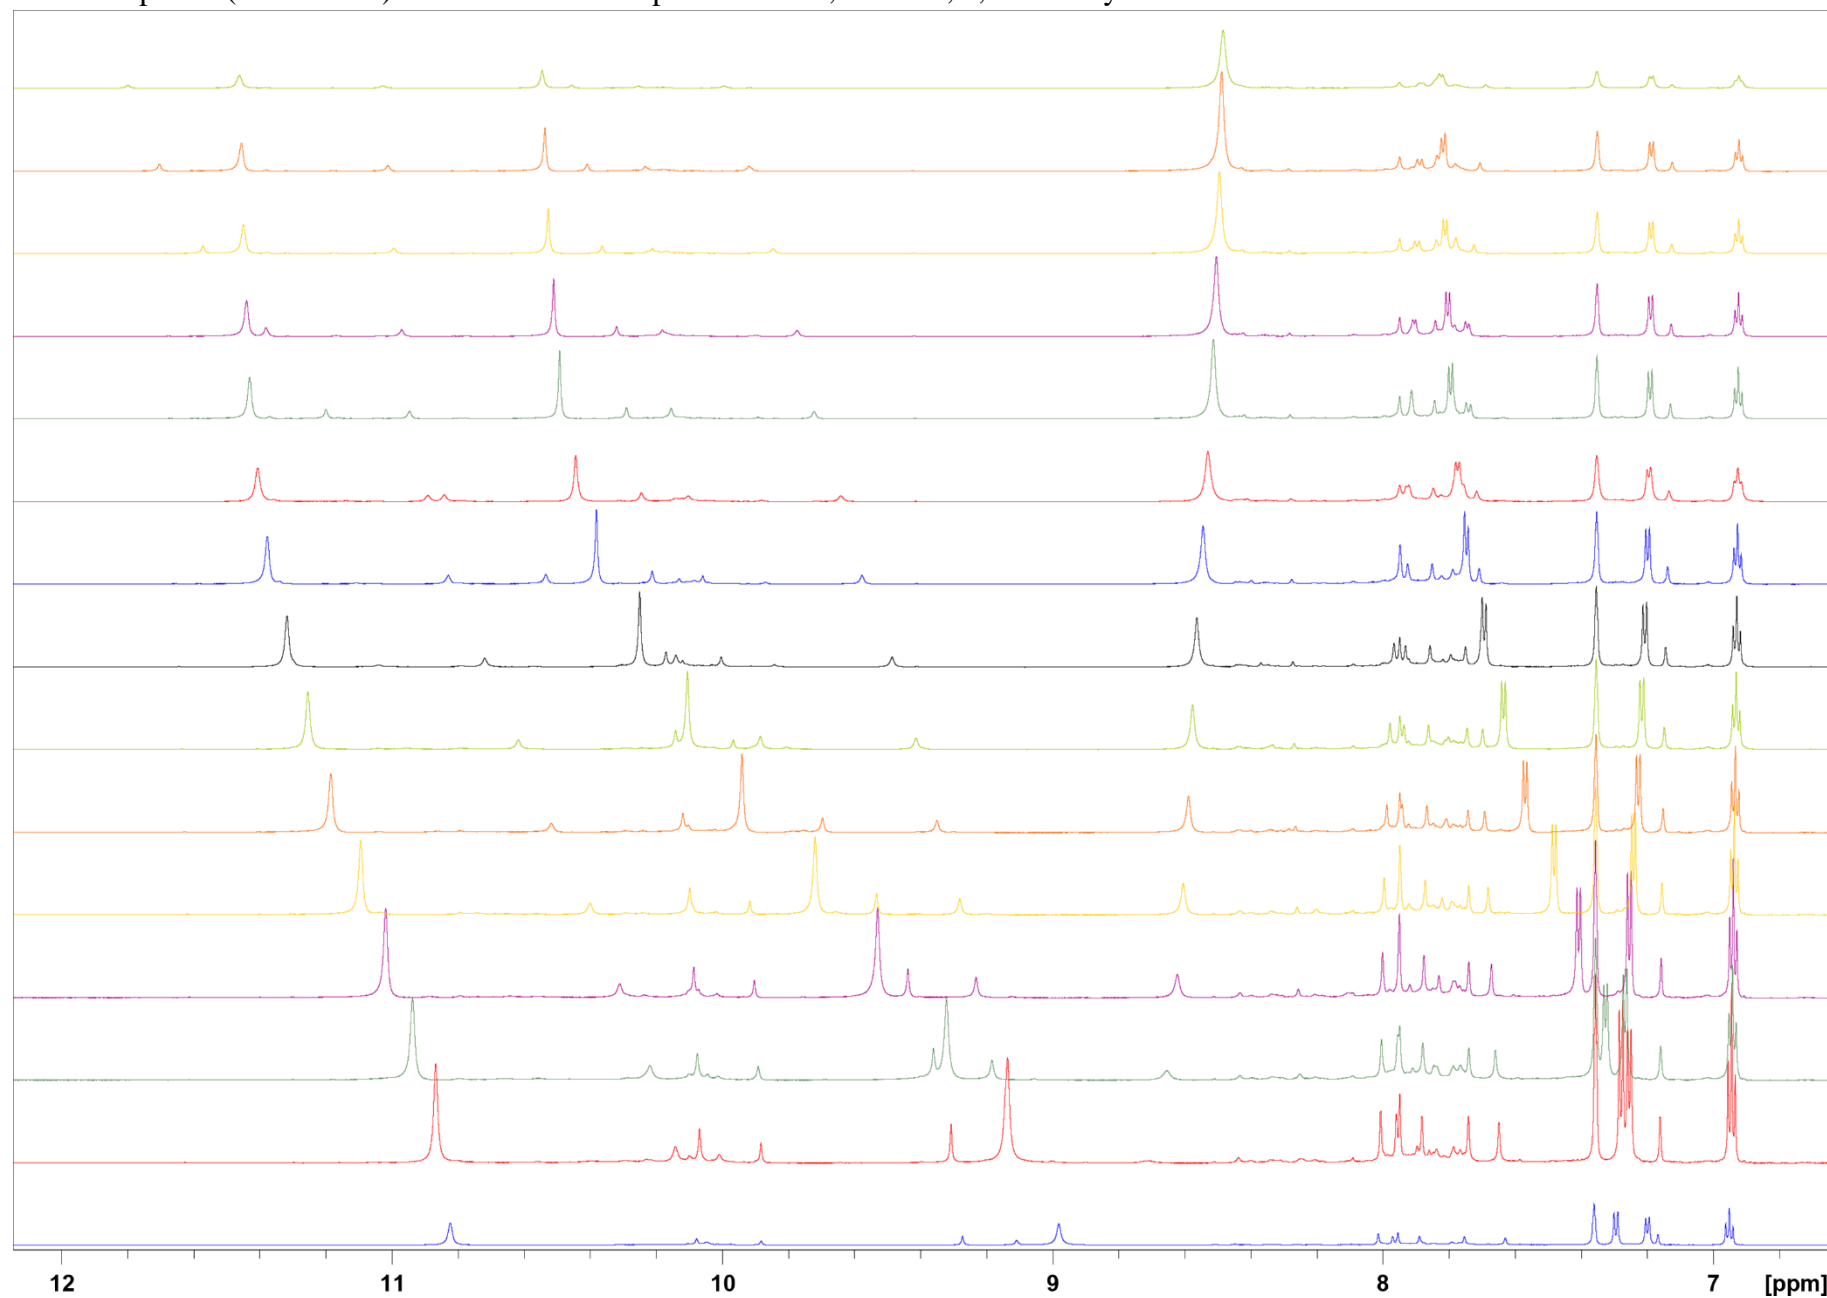



Stacked  $^1\text{H}$  NMR spectra (700.1 MHz) of a mixture of receptors **MC002**; 1,3-diindolylurea; 1,3-dicarbazolylurea + TBA-formate

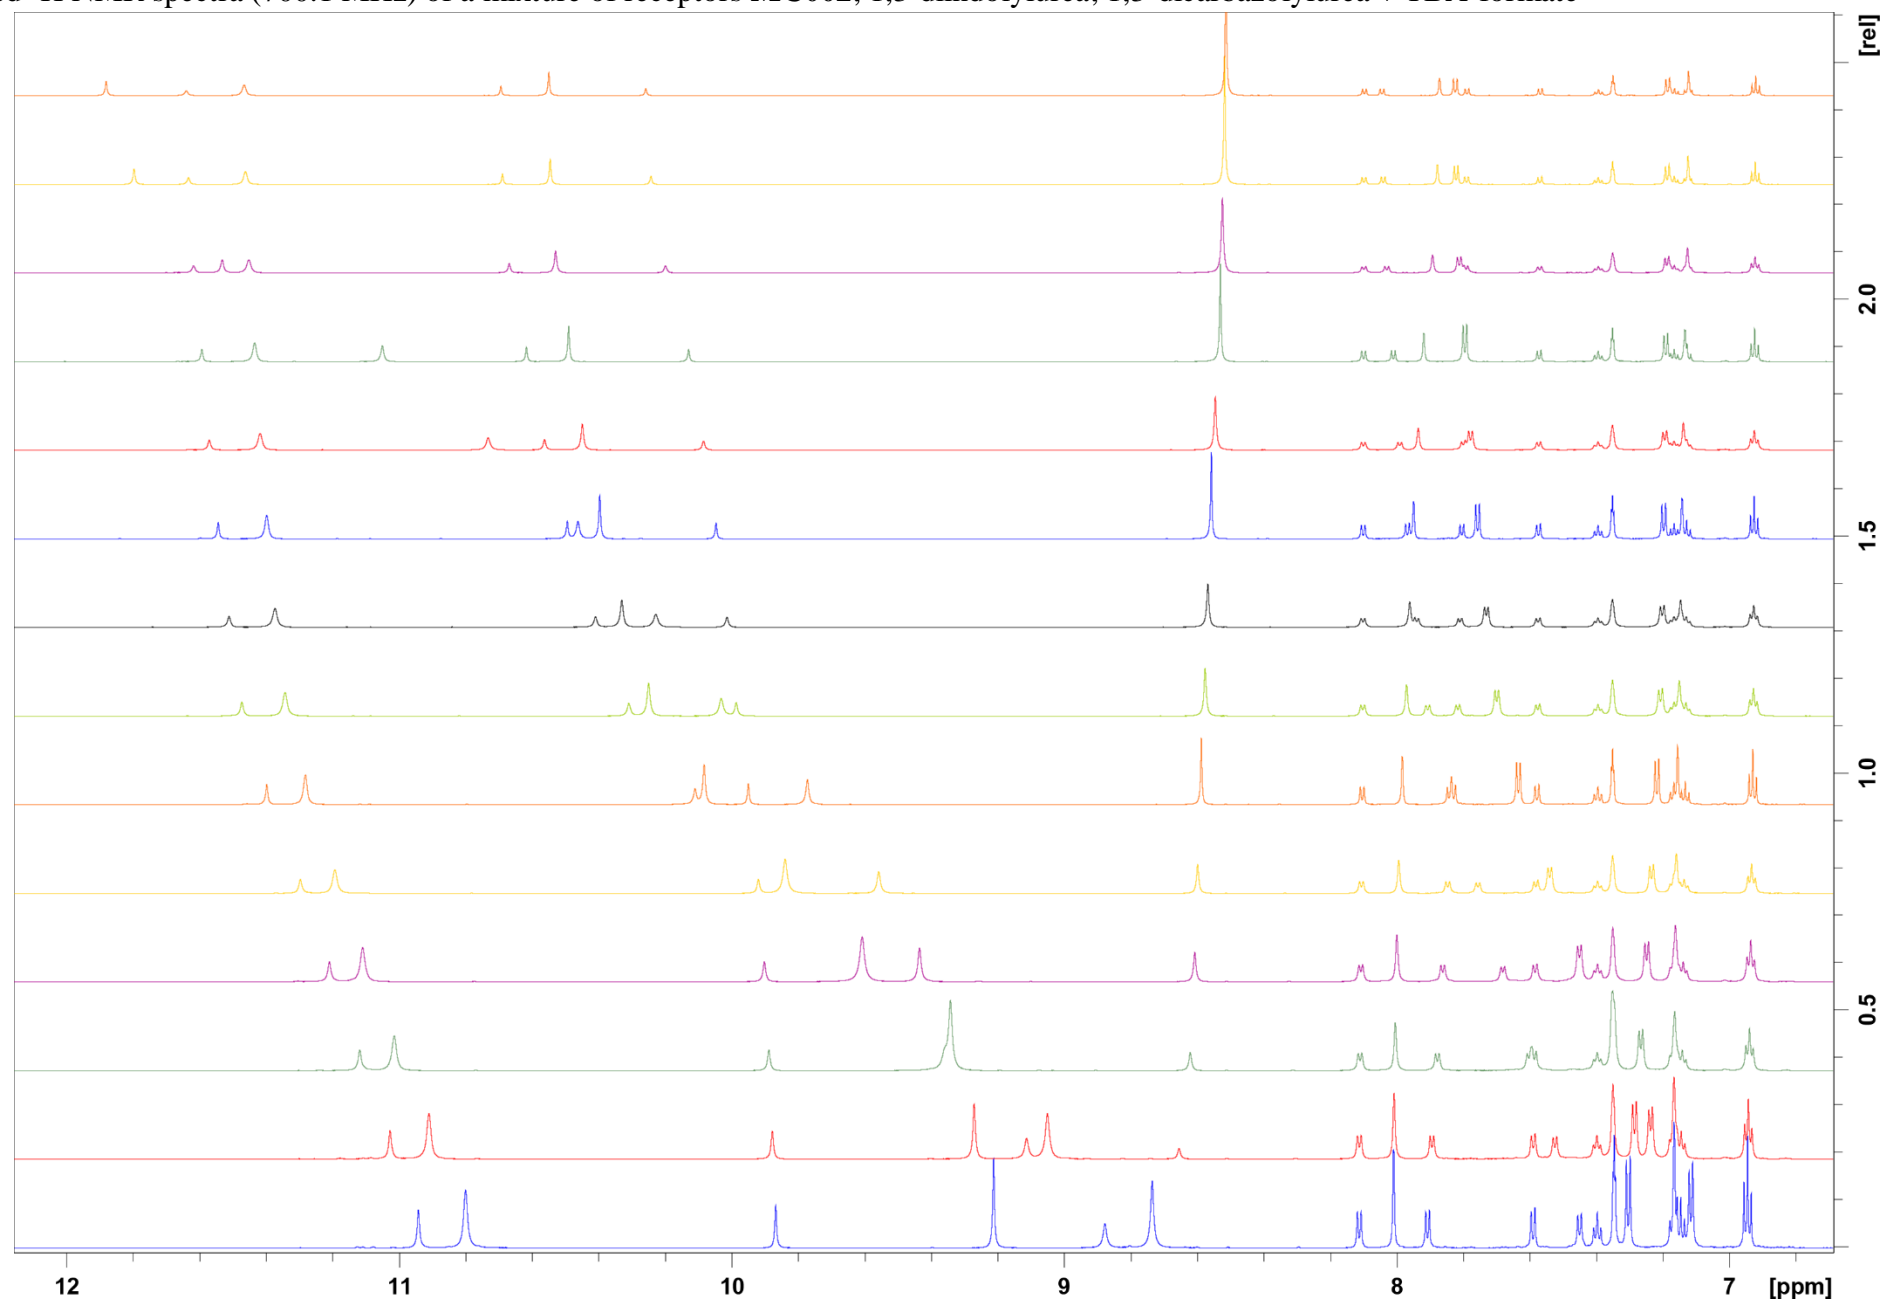

Stacked  $^1\text{H}$  NMR spectra (700.1 MHz) of a mixture of receptors **MC003**; 1,3-diindolylurea; 1,3-dicarbazolylurea + TBA-formate

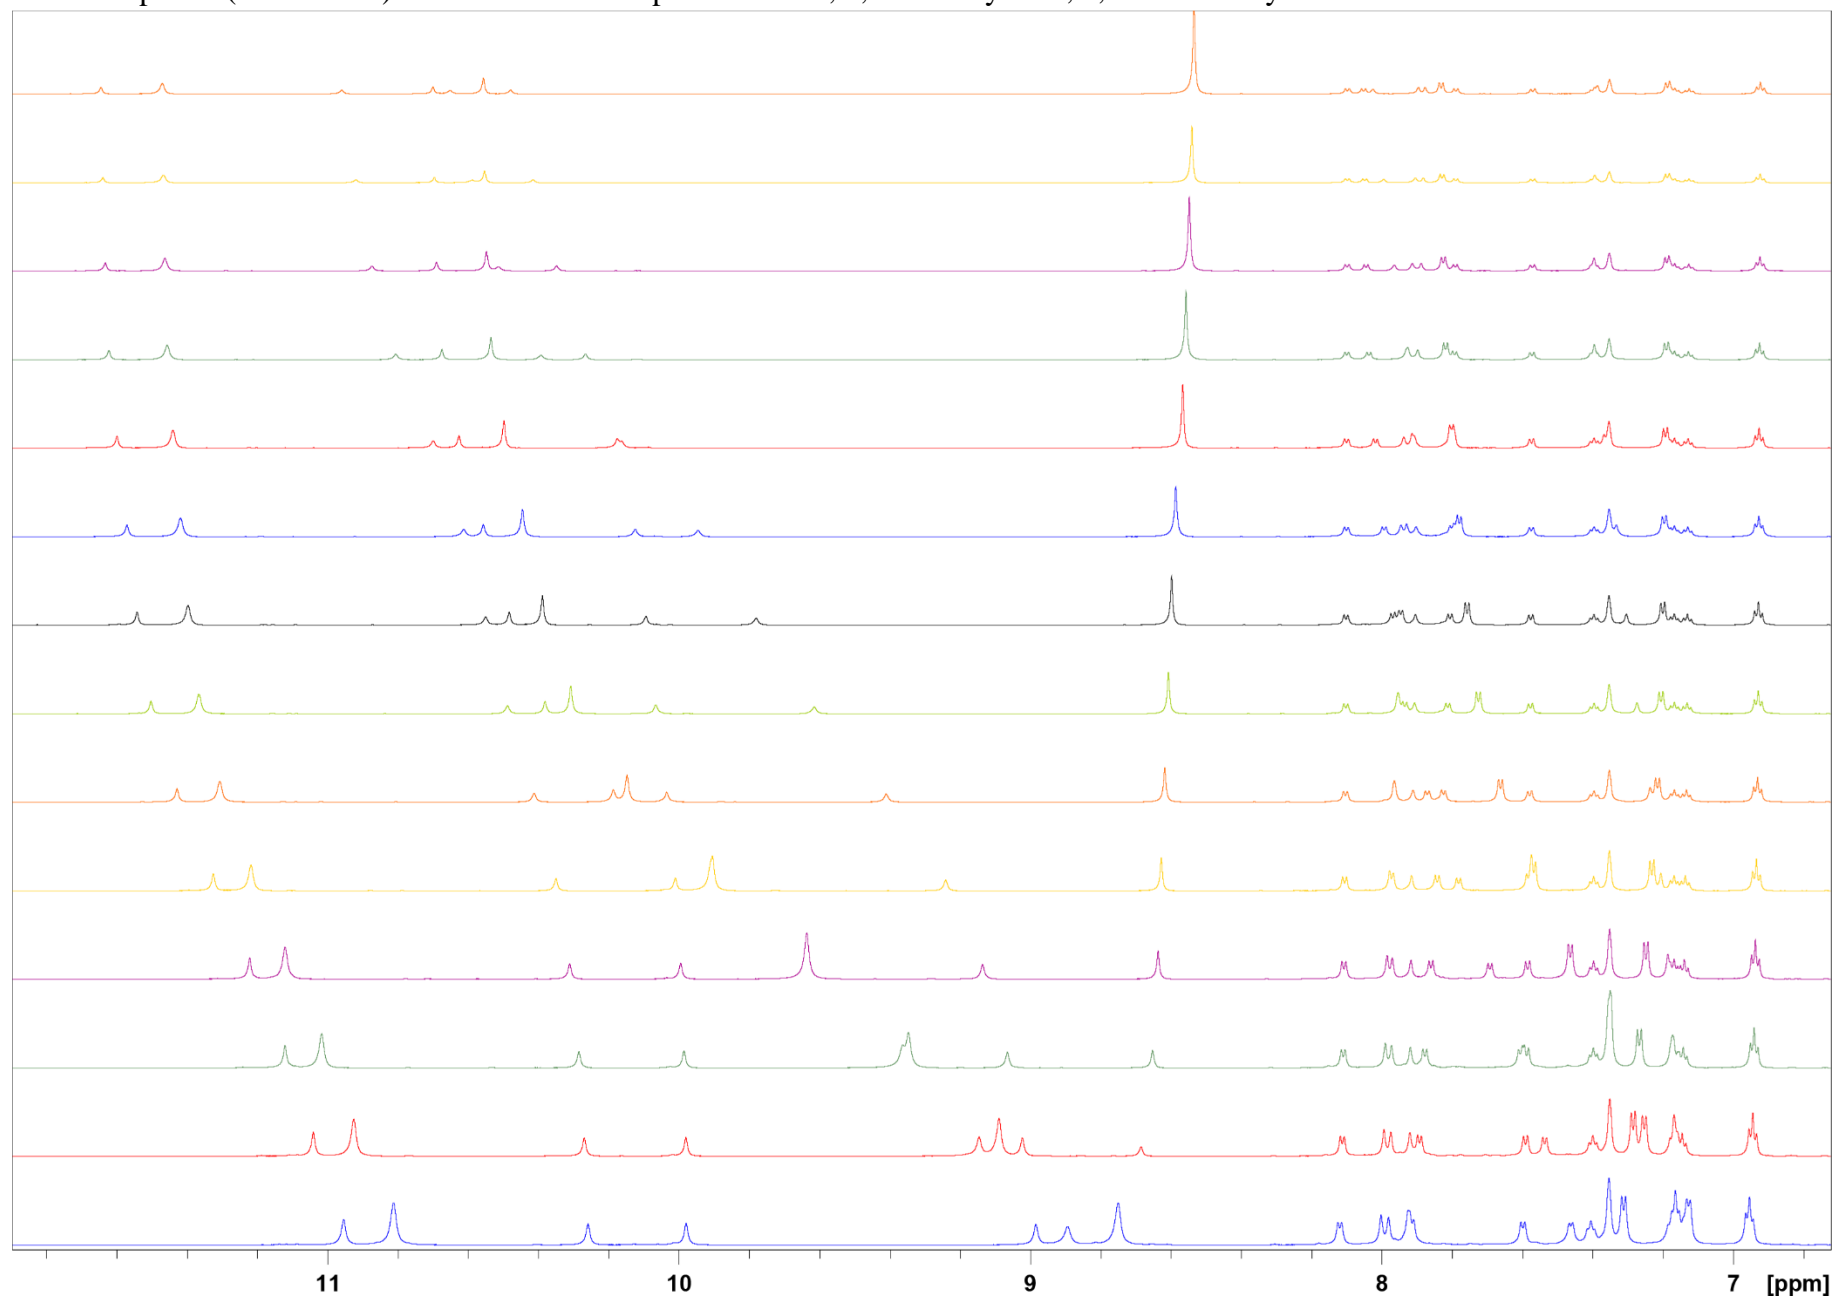

Stacked  $^1\text{H}$  NMR spectra (700.1 MHz) of a mixture of receptors **MC005**; 1,3-diindolylurea; 1,3-dicarbazolylurea + TBA-formate

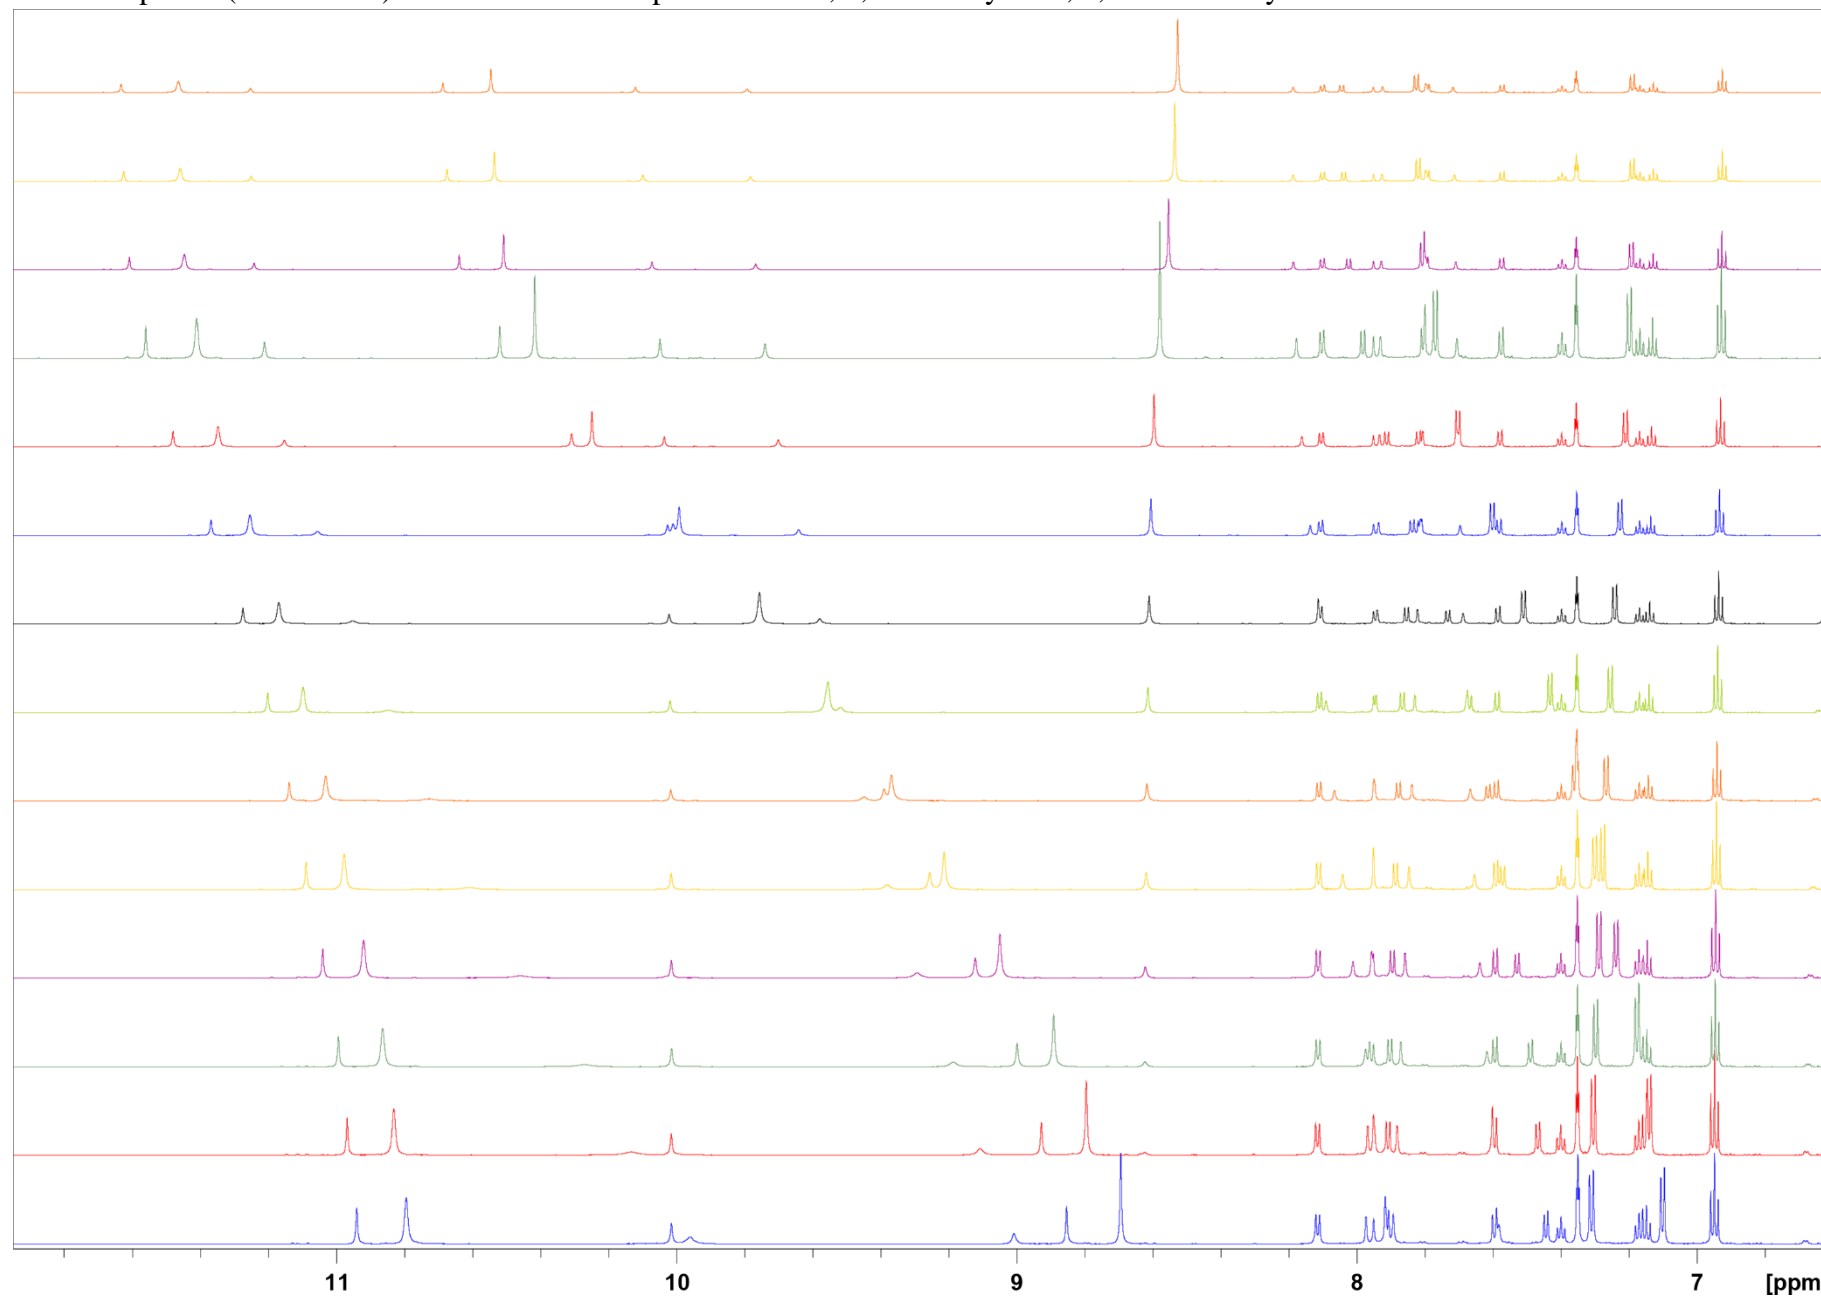

Stacked  $^1\text{H}$  NMR spectra (700.1 MHz) of a mixture of receptors **MC006**; **MC008**; 1,3-diindolylurea; 1,3-dicarbazolylurea + TBA-formate

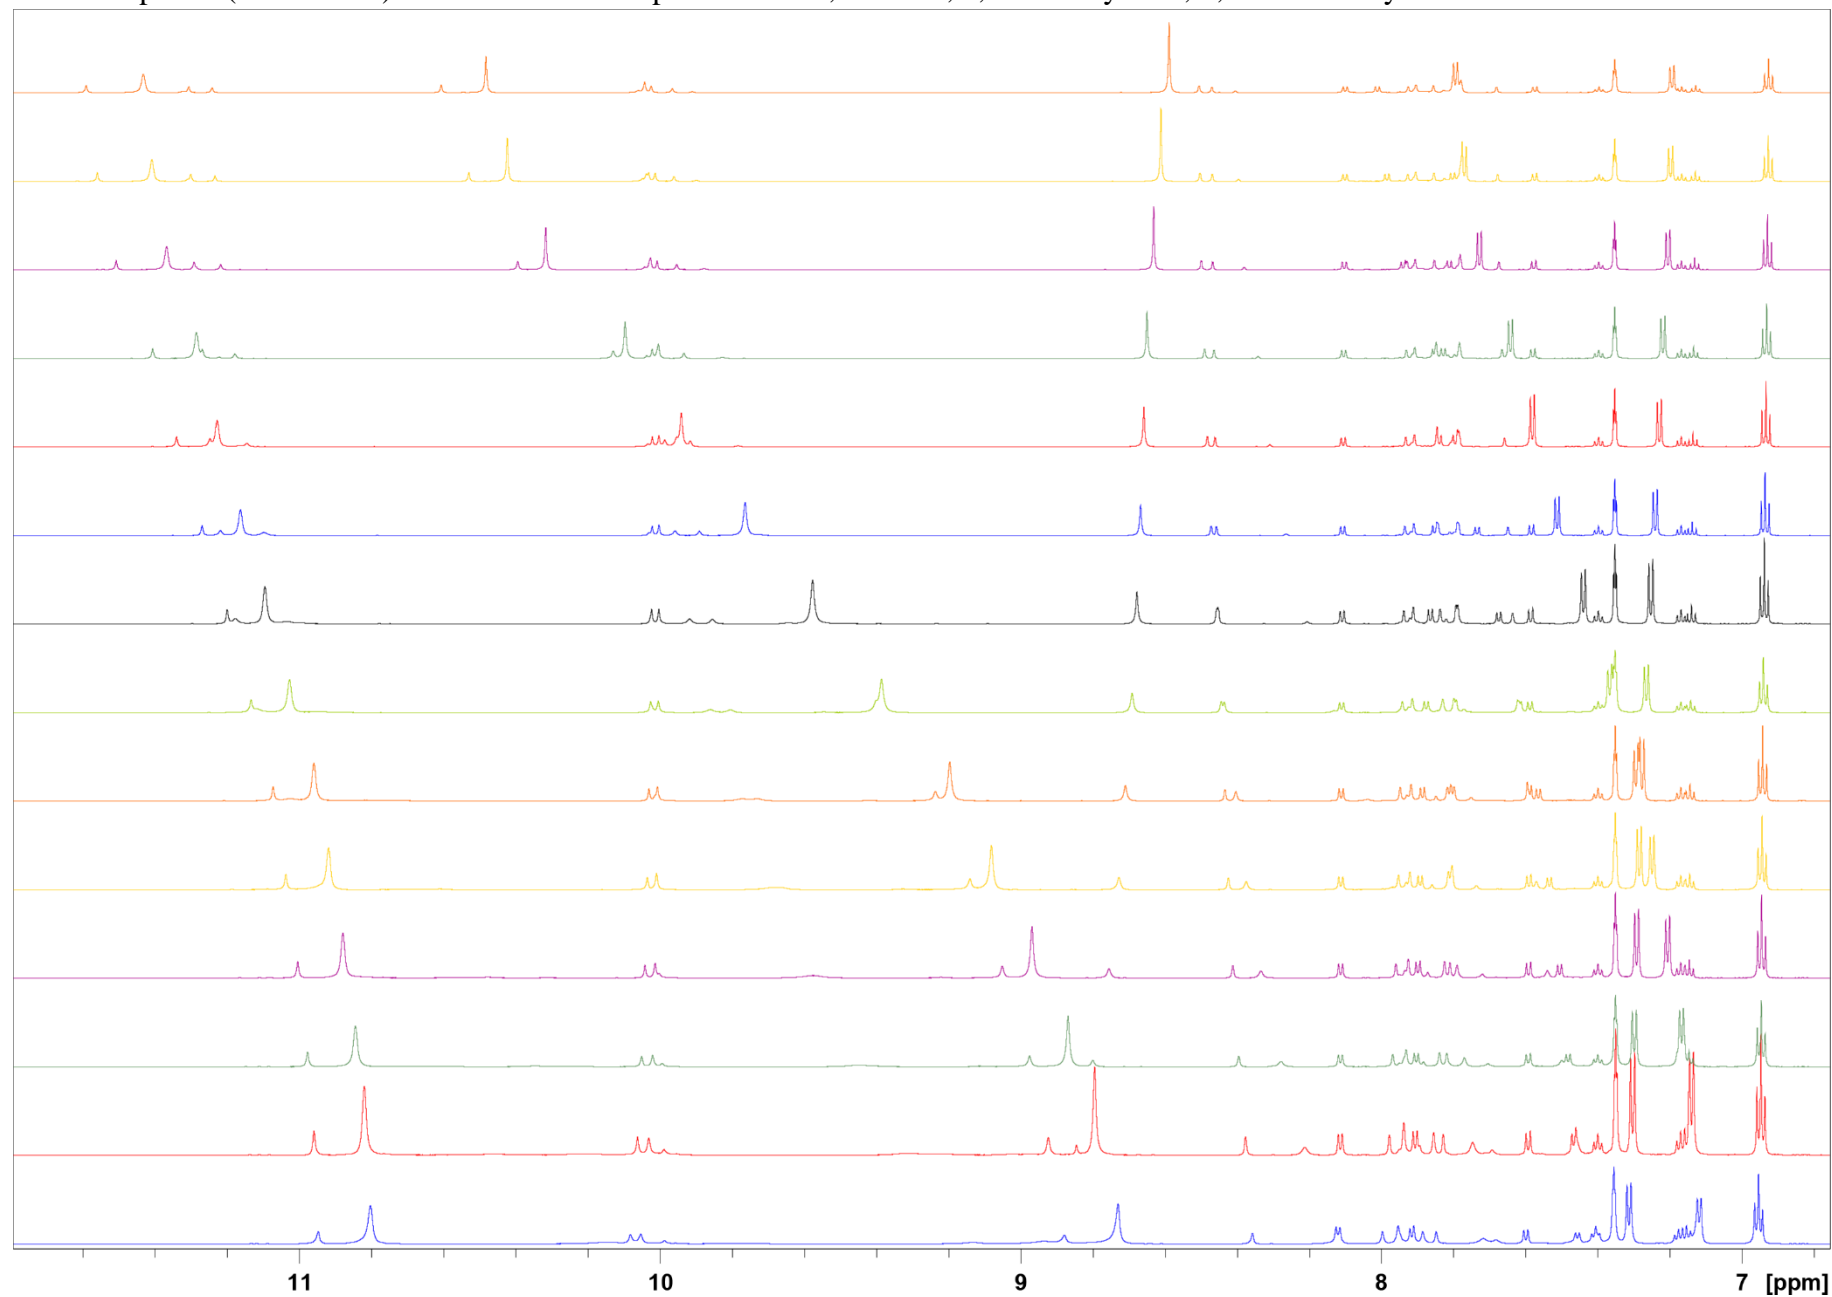

Stacked  $^1\text{H}$  NMR spectra (700.1 MHz) of a mixture of receptors **MC007**; 1,3-diindolylurea; 1,3-dicarbazolylurea + TBA-formate

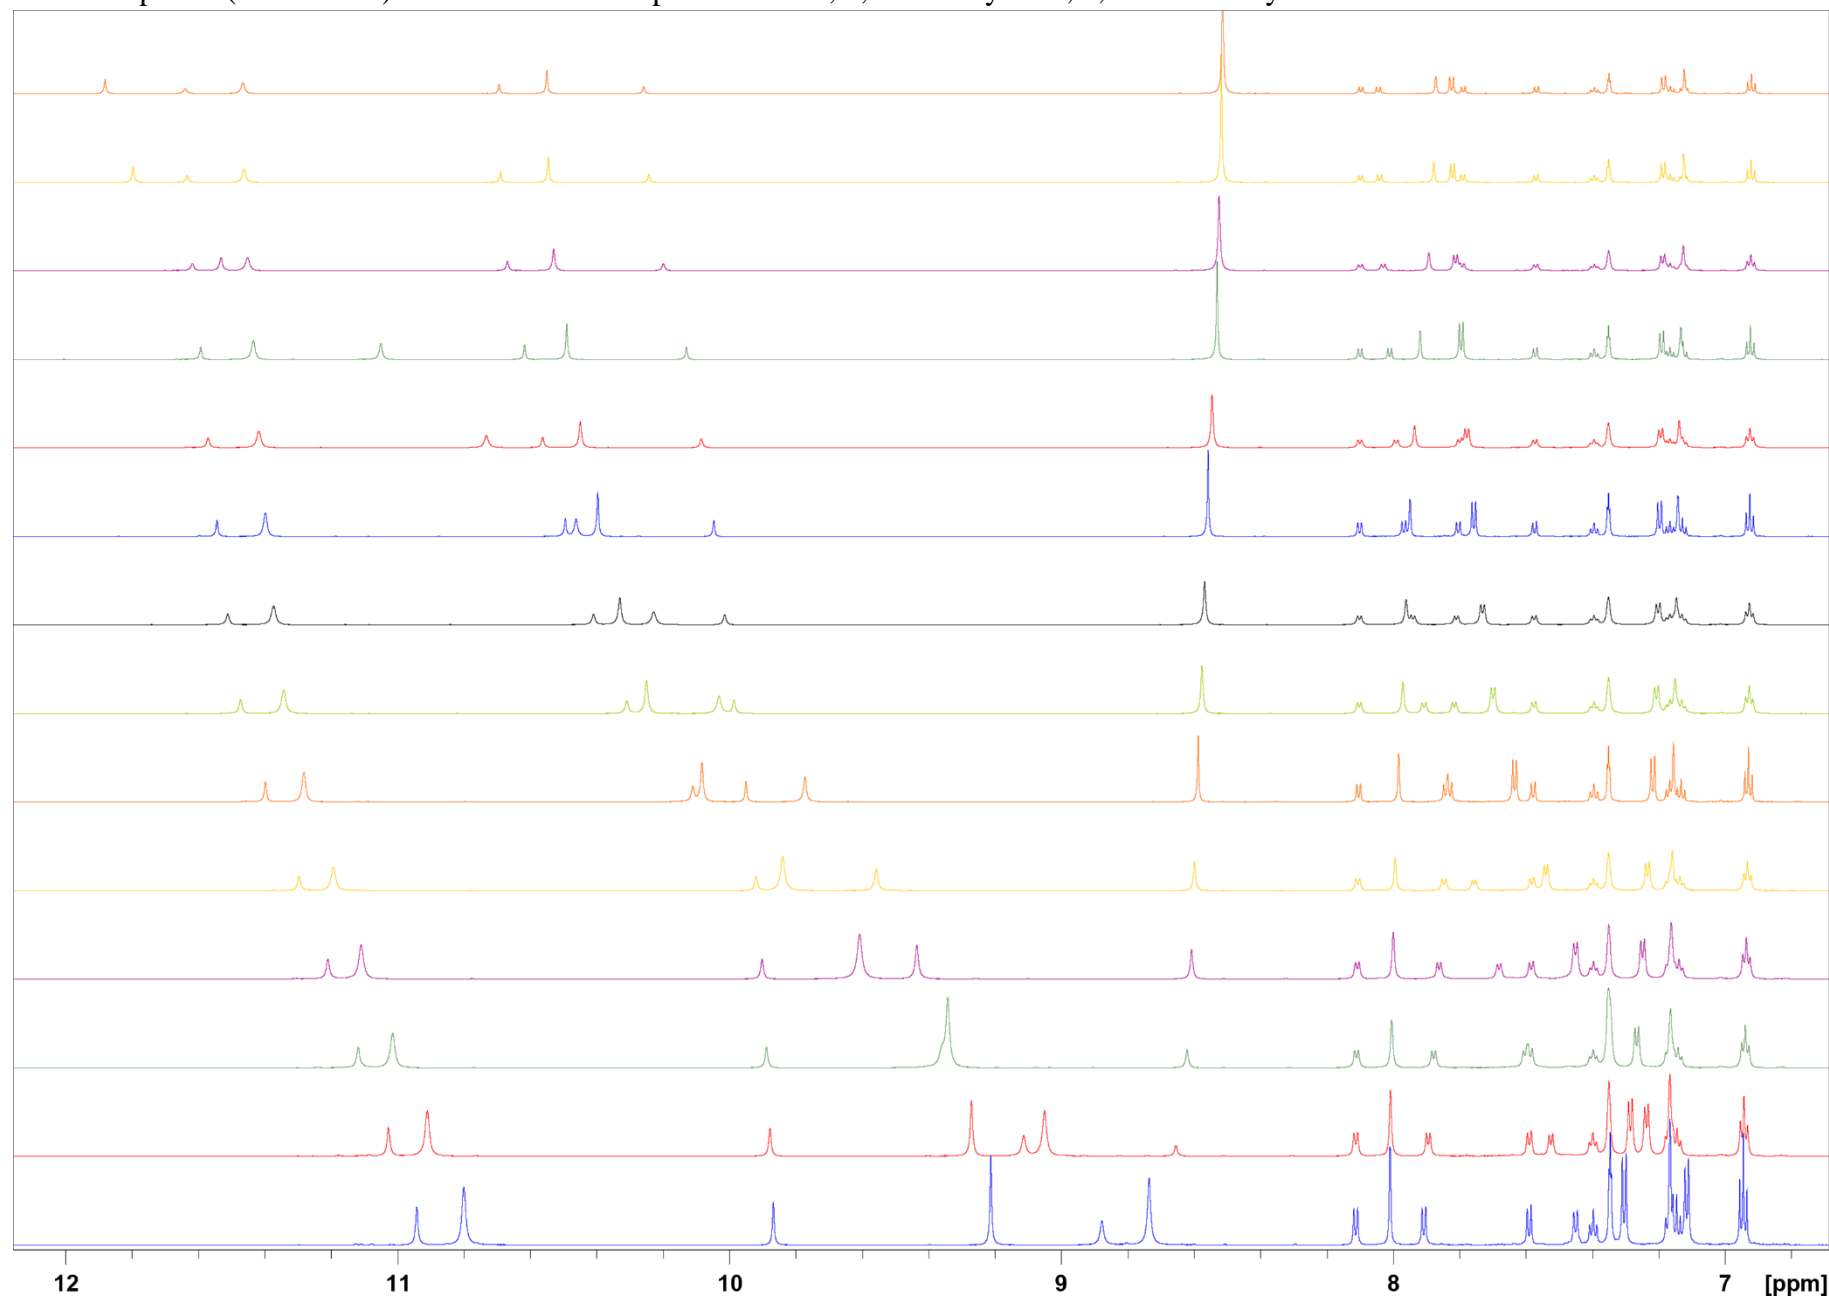

Stacked  $^1\text{H}$  NMR spectra (700.1 MHz) of a mixture of receptors **MC008**; **MC009**; 1,3-diindolylurea; 1,3-dicarbazolylurea + TBA-formate

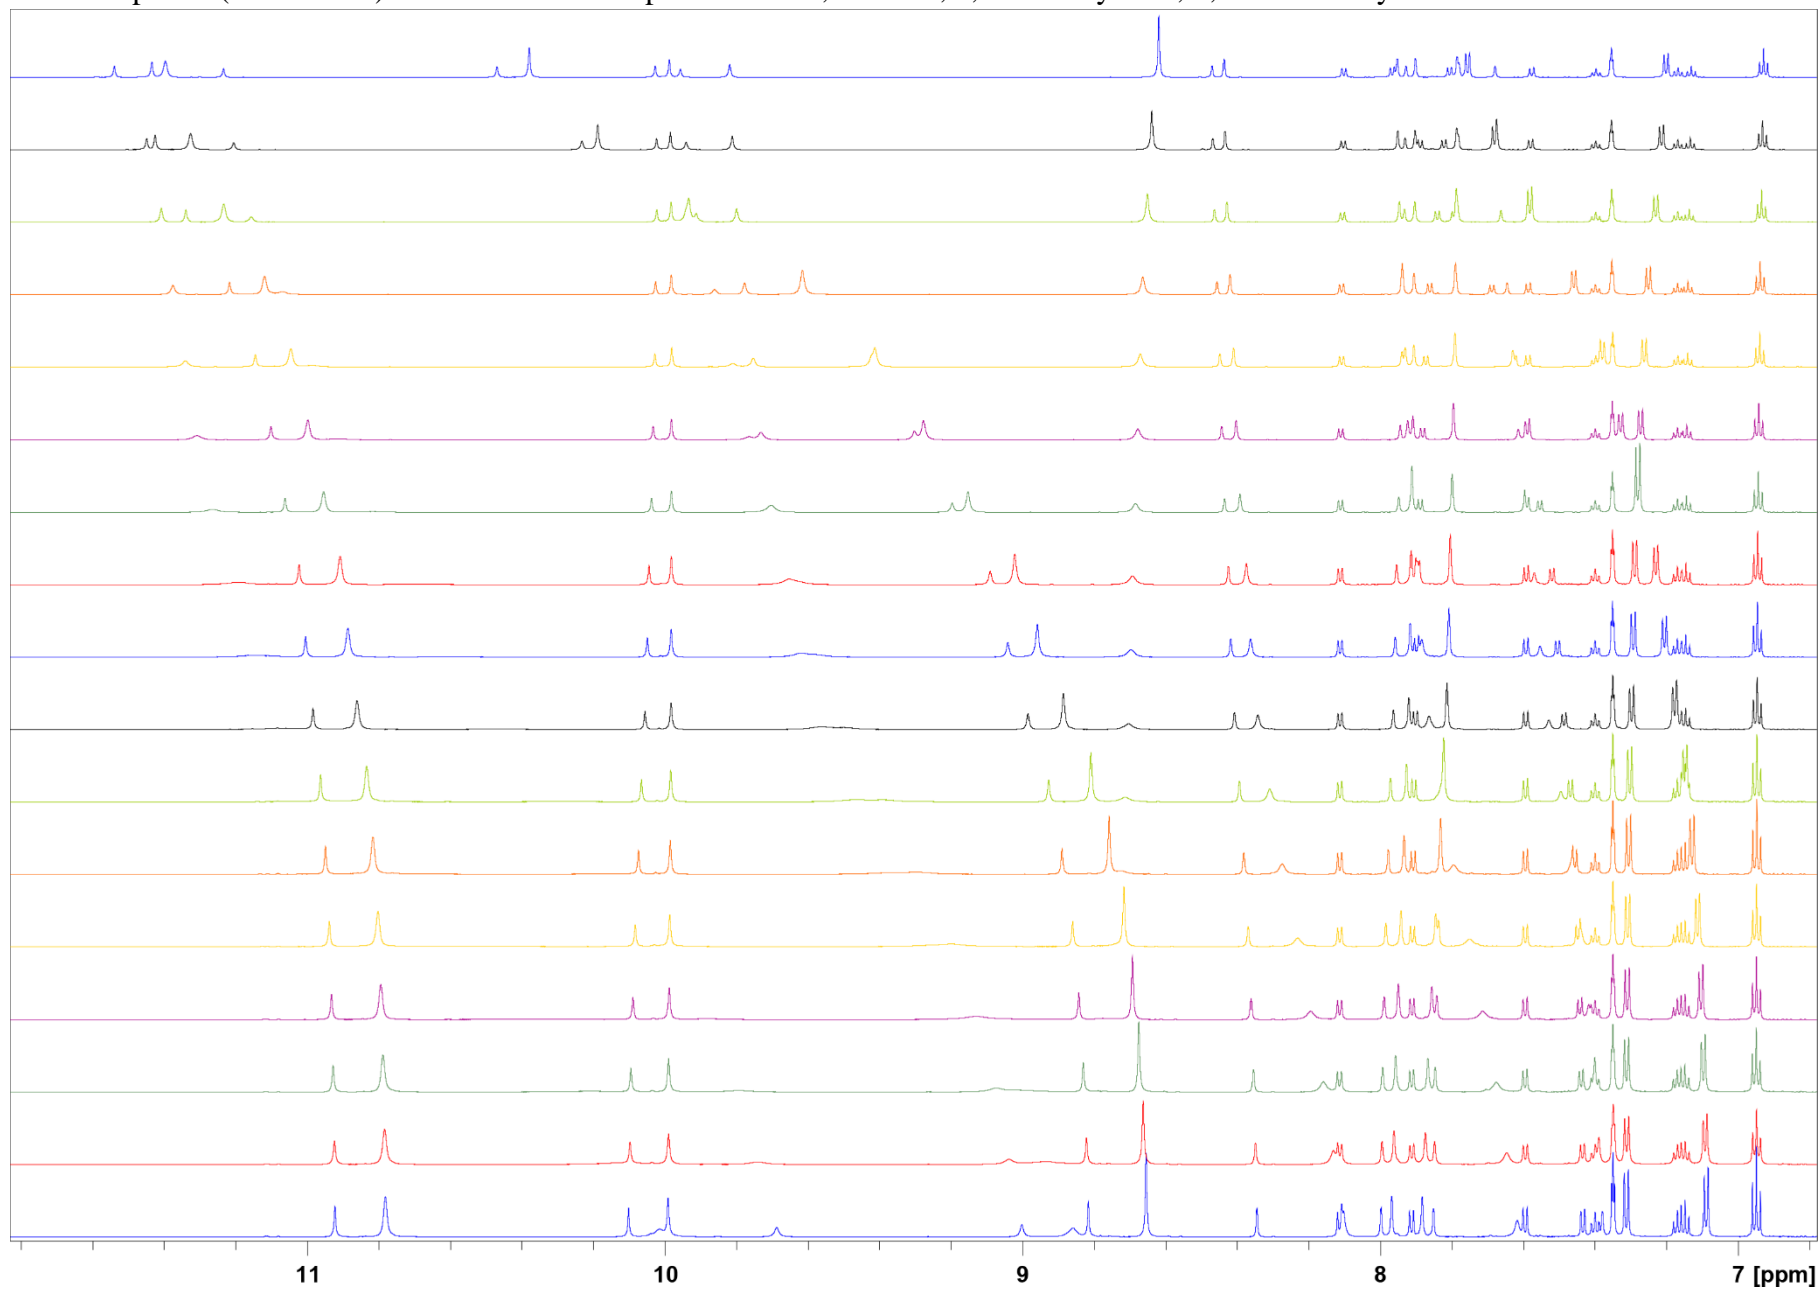

Stacked  $^1\text{H}$  NMR spectra (700.1 MHz) of a mixture of receptors **MC010**; 1,3-diindolylurea; 1,3-dicarbazolylurea + TBA-formate

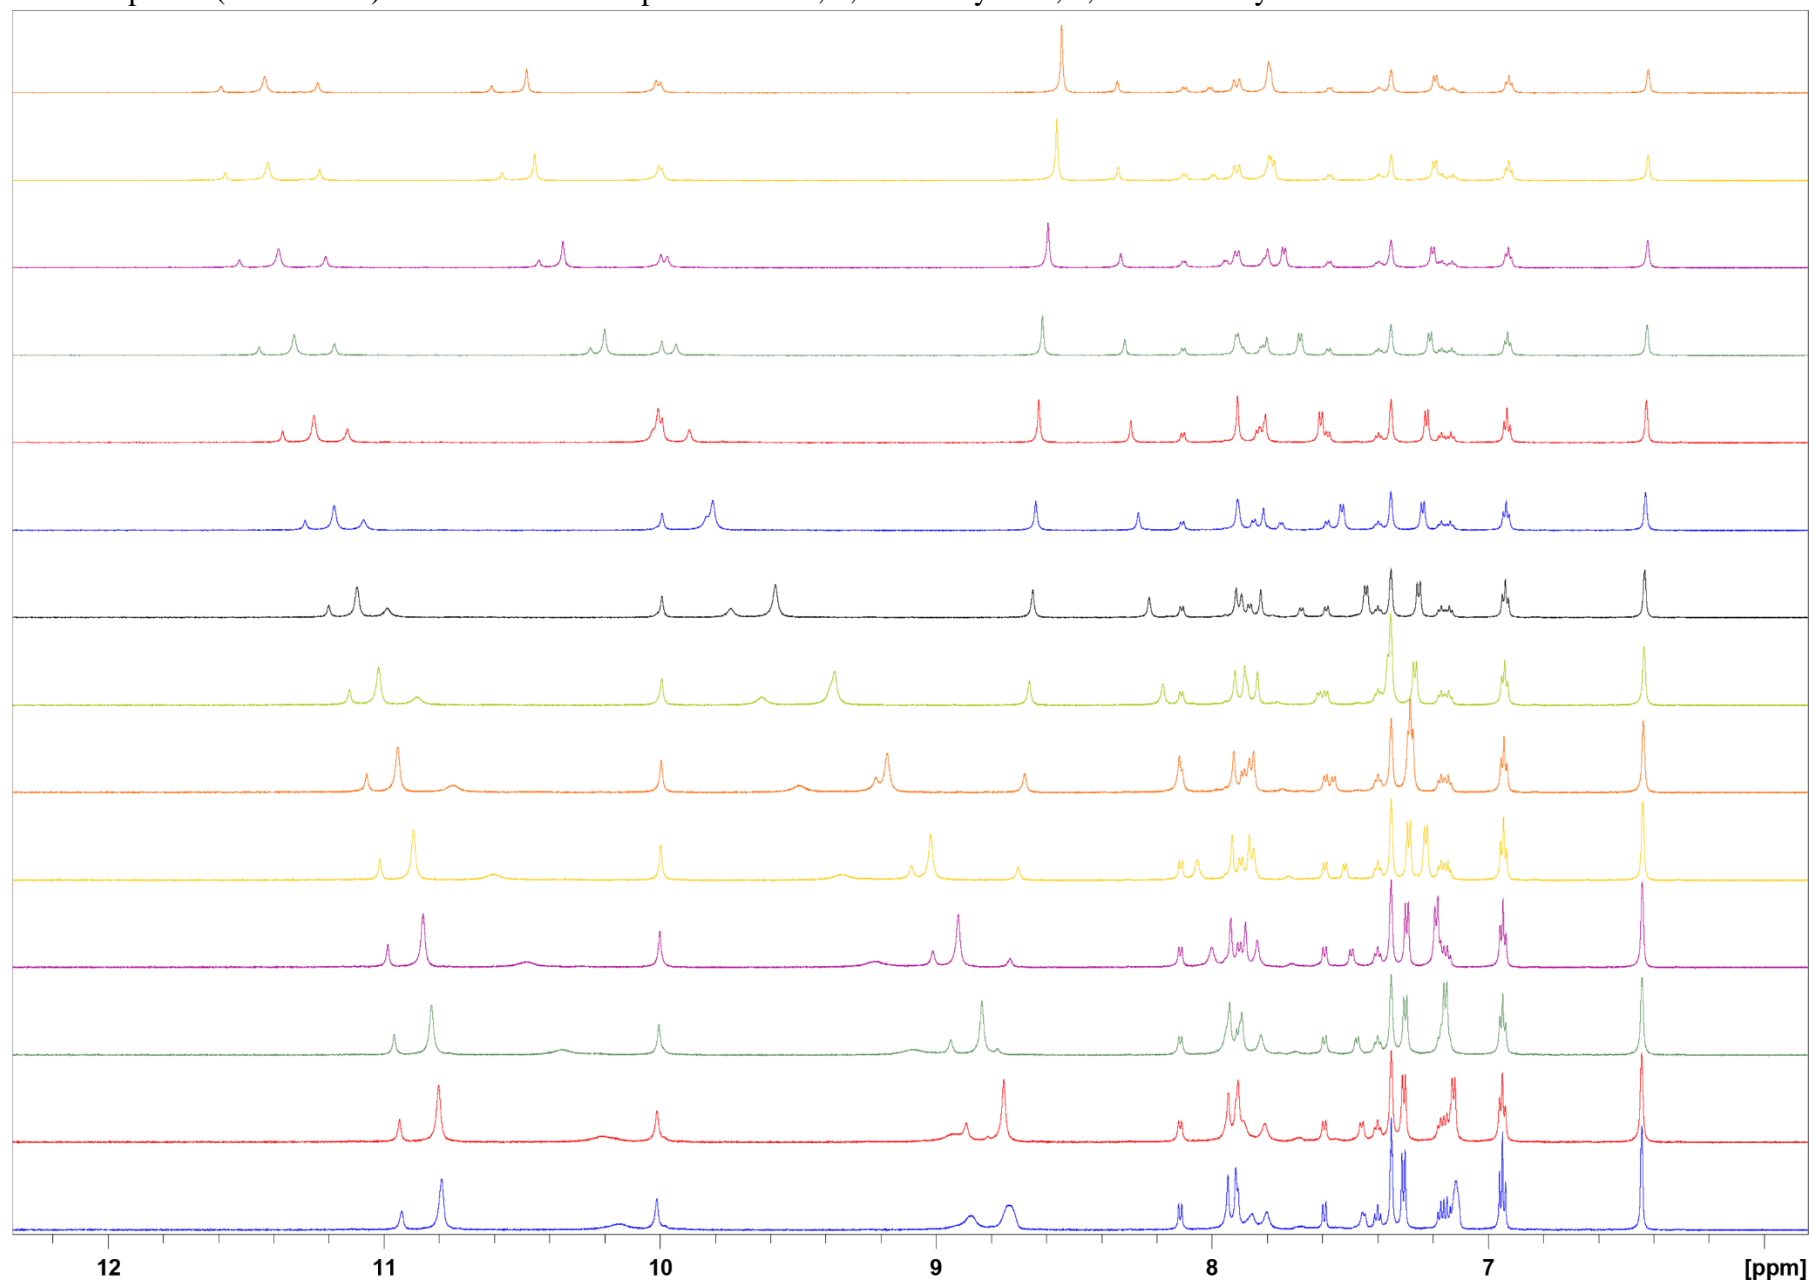

Stacked  $^1\text{H}$  NMR spectra (700.1 MHz) of a mixture of receptors **MC011**; 1,3-diindolylurea; 1,3-dicarbazolylurea + TBA-formate

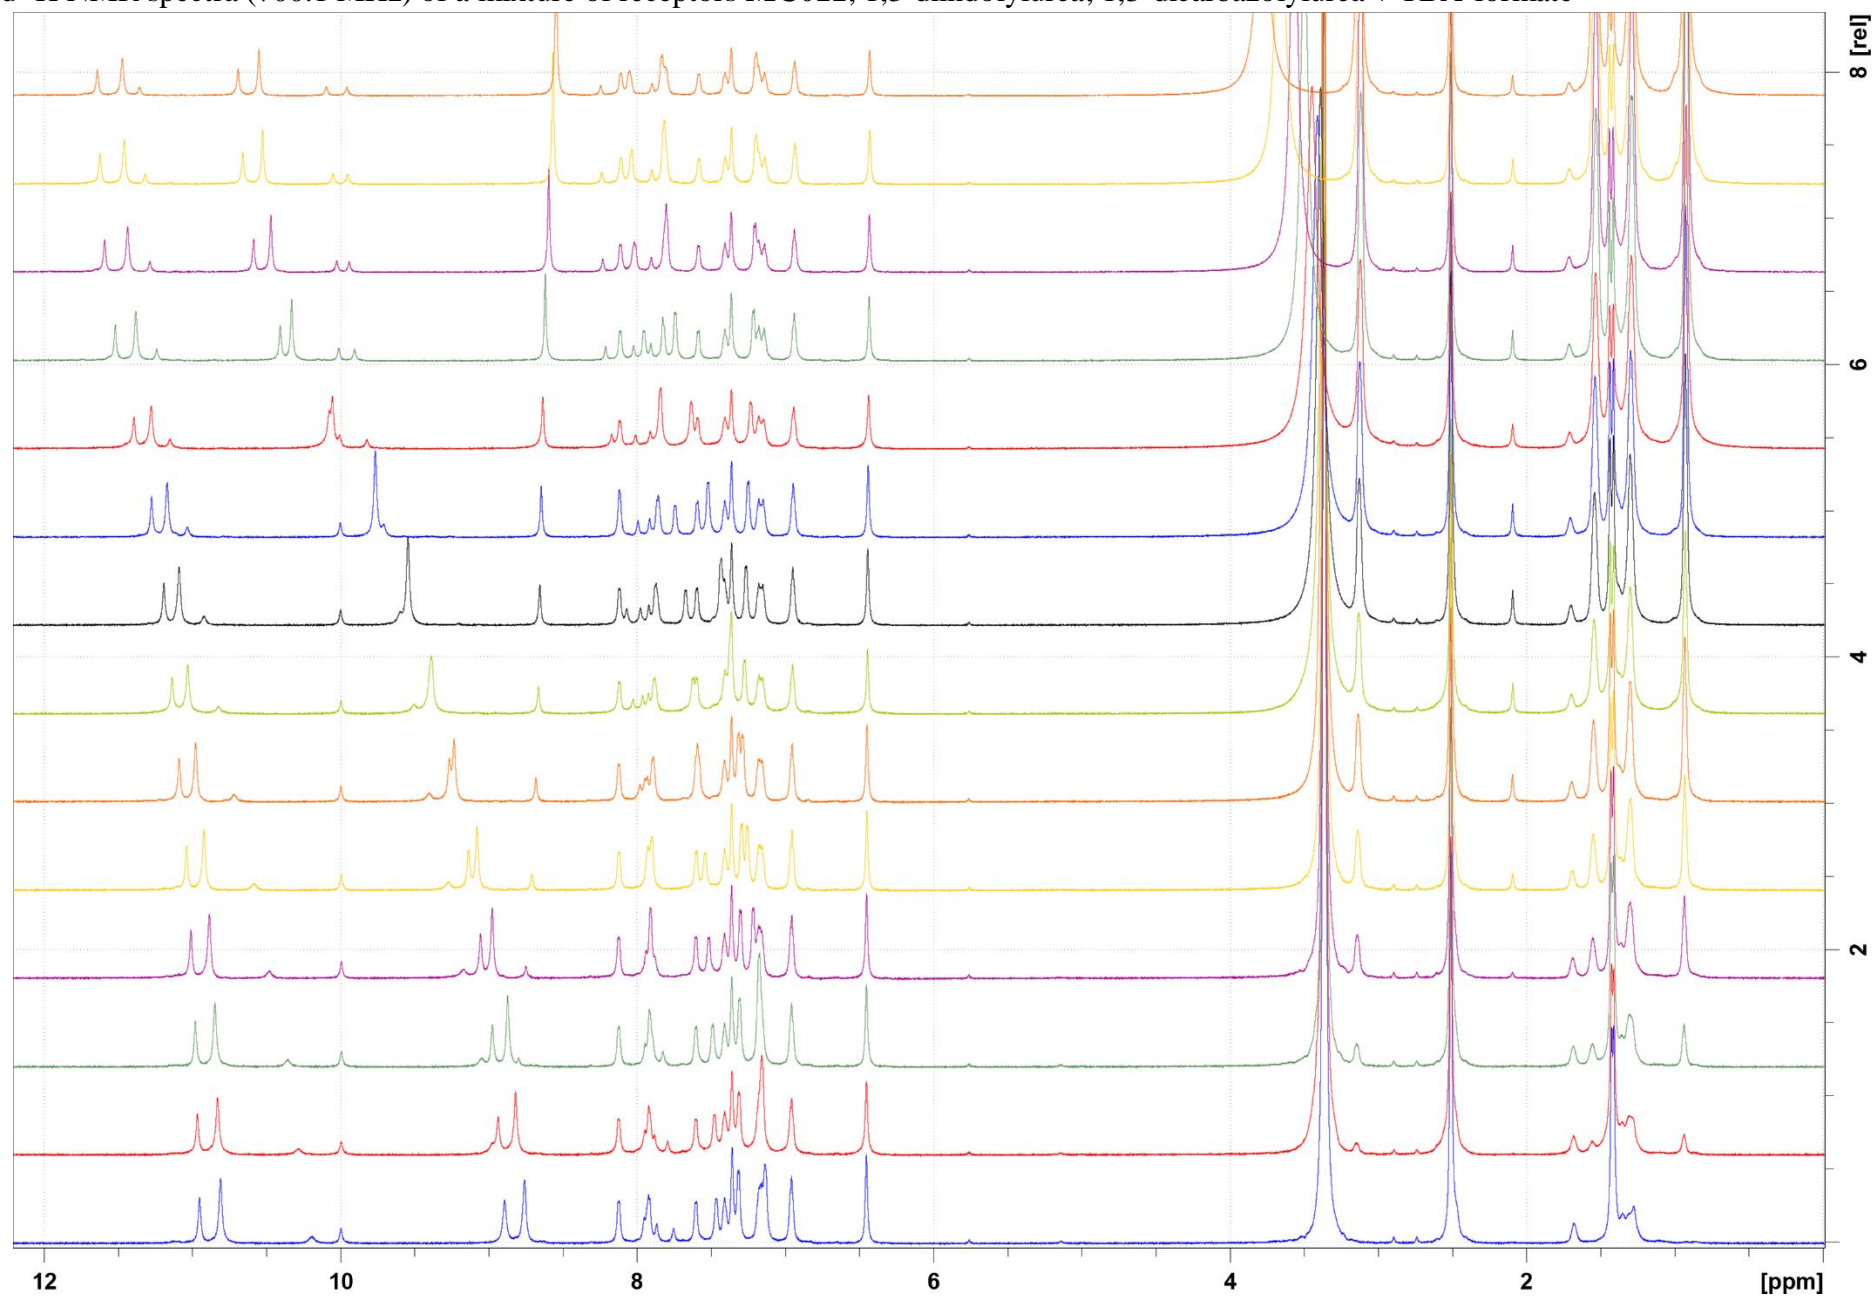



Stacked  $^1\text{H}$  NMR spectra (700.1 MHz) of a mixture of receptors **MC012**; 1,3-diindolylurea; 1,3-dicarbazolylurea + TBA-formate

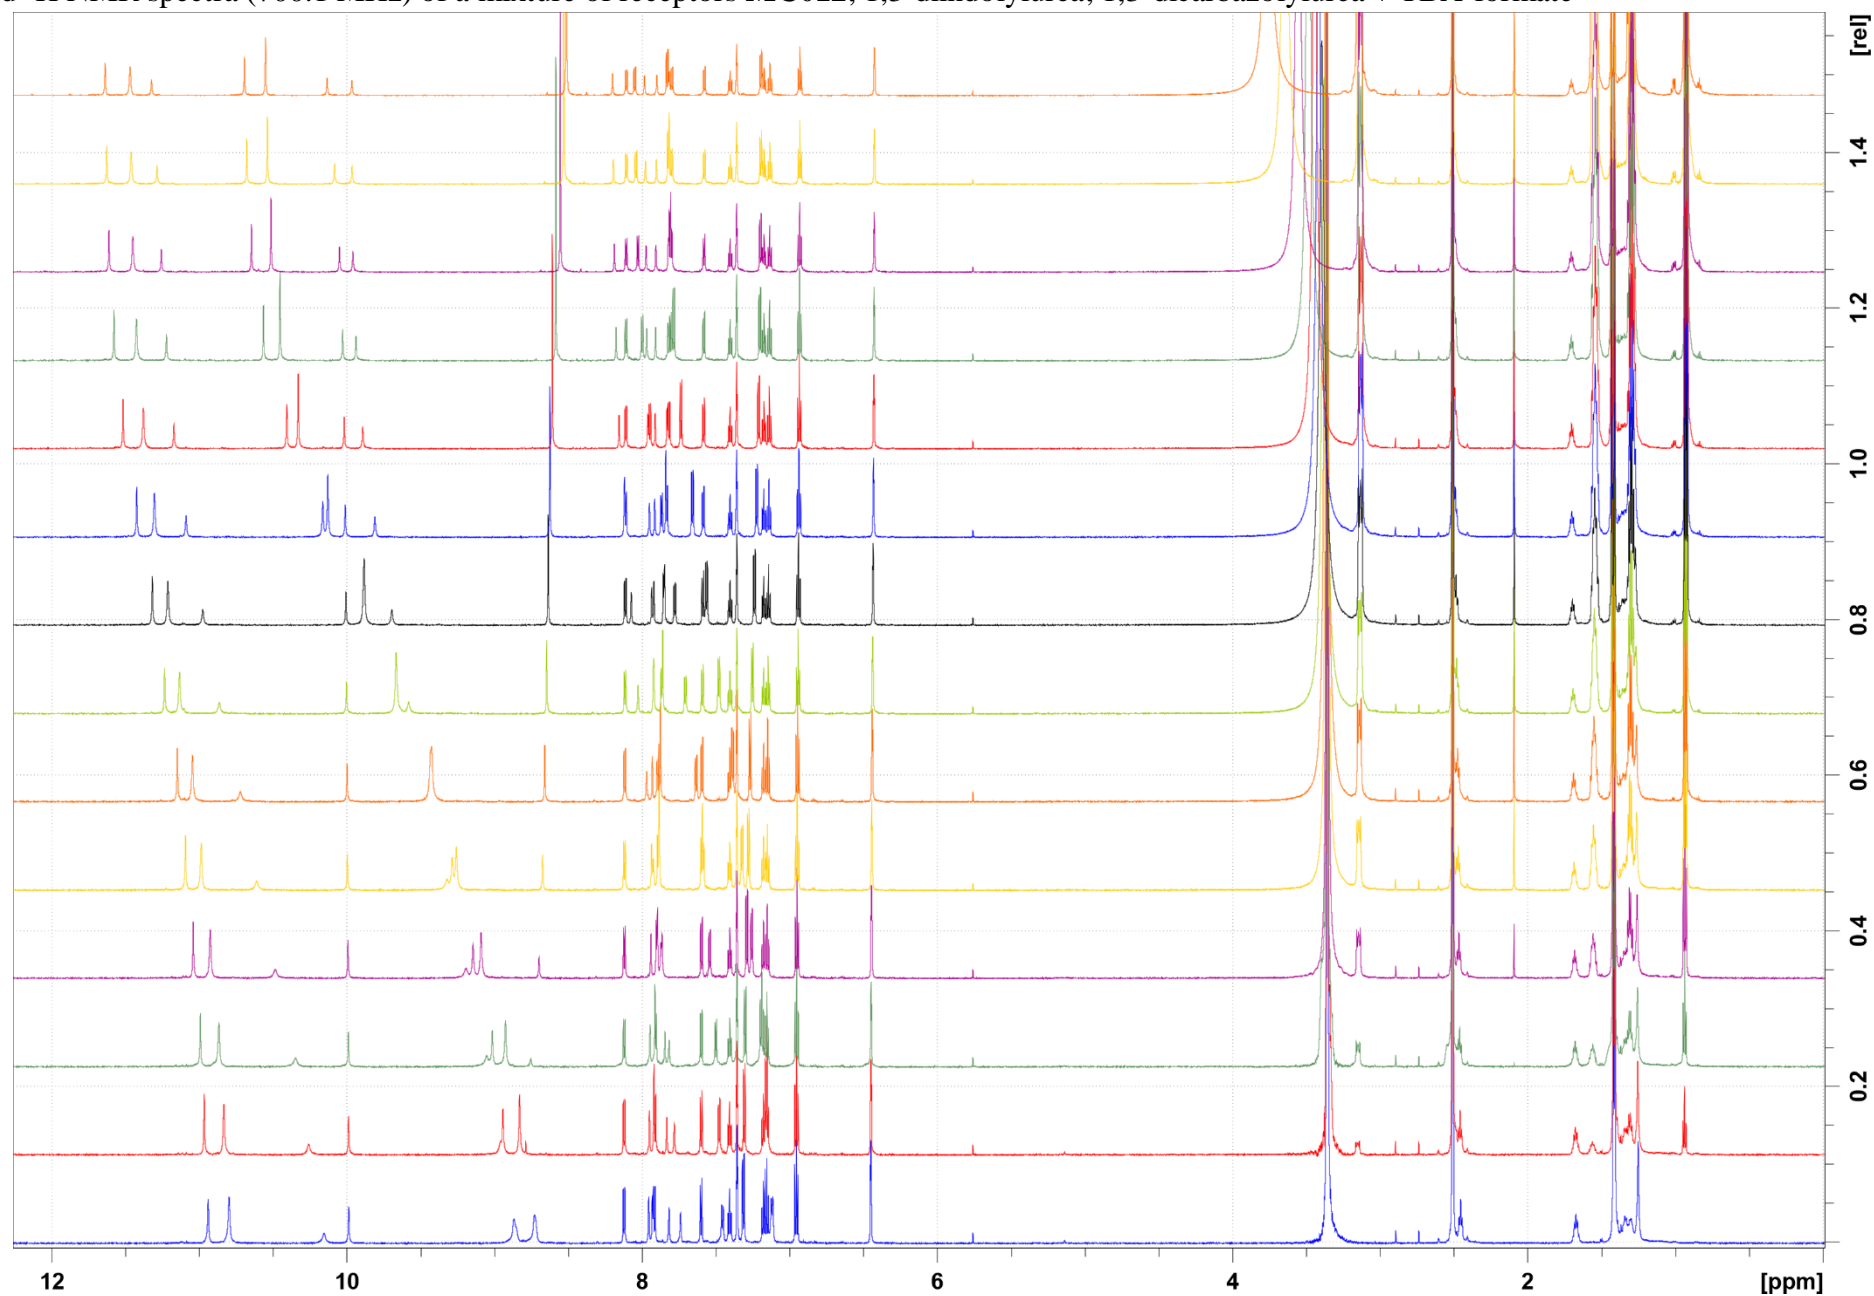

Stacked  $^1\text{H}$  NMR spectra (700.1 MHz) of a mixture of receptors **MC013**; 1,3-diindolylurea; 1,3-dicarbazolylurea + TBA-formate

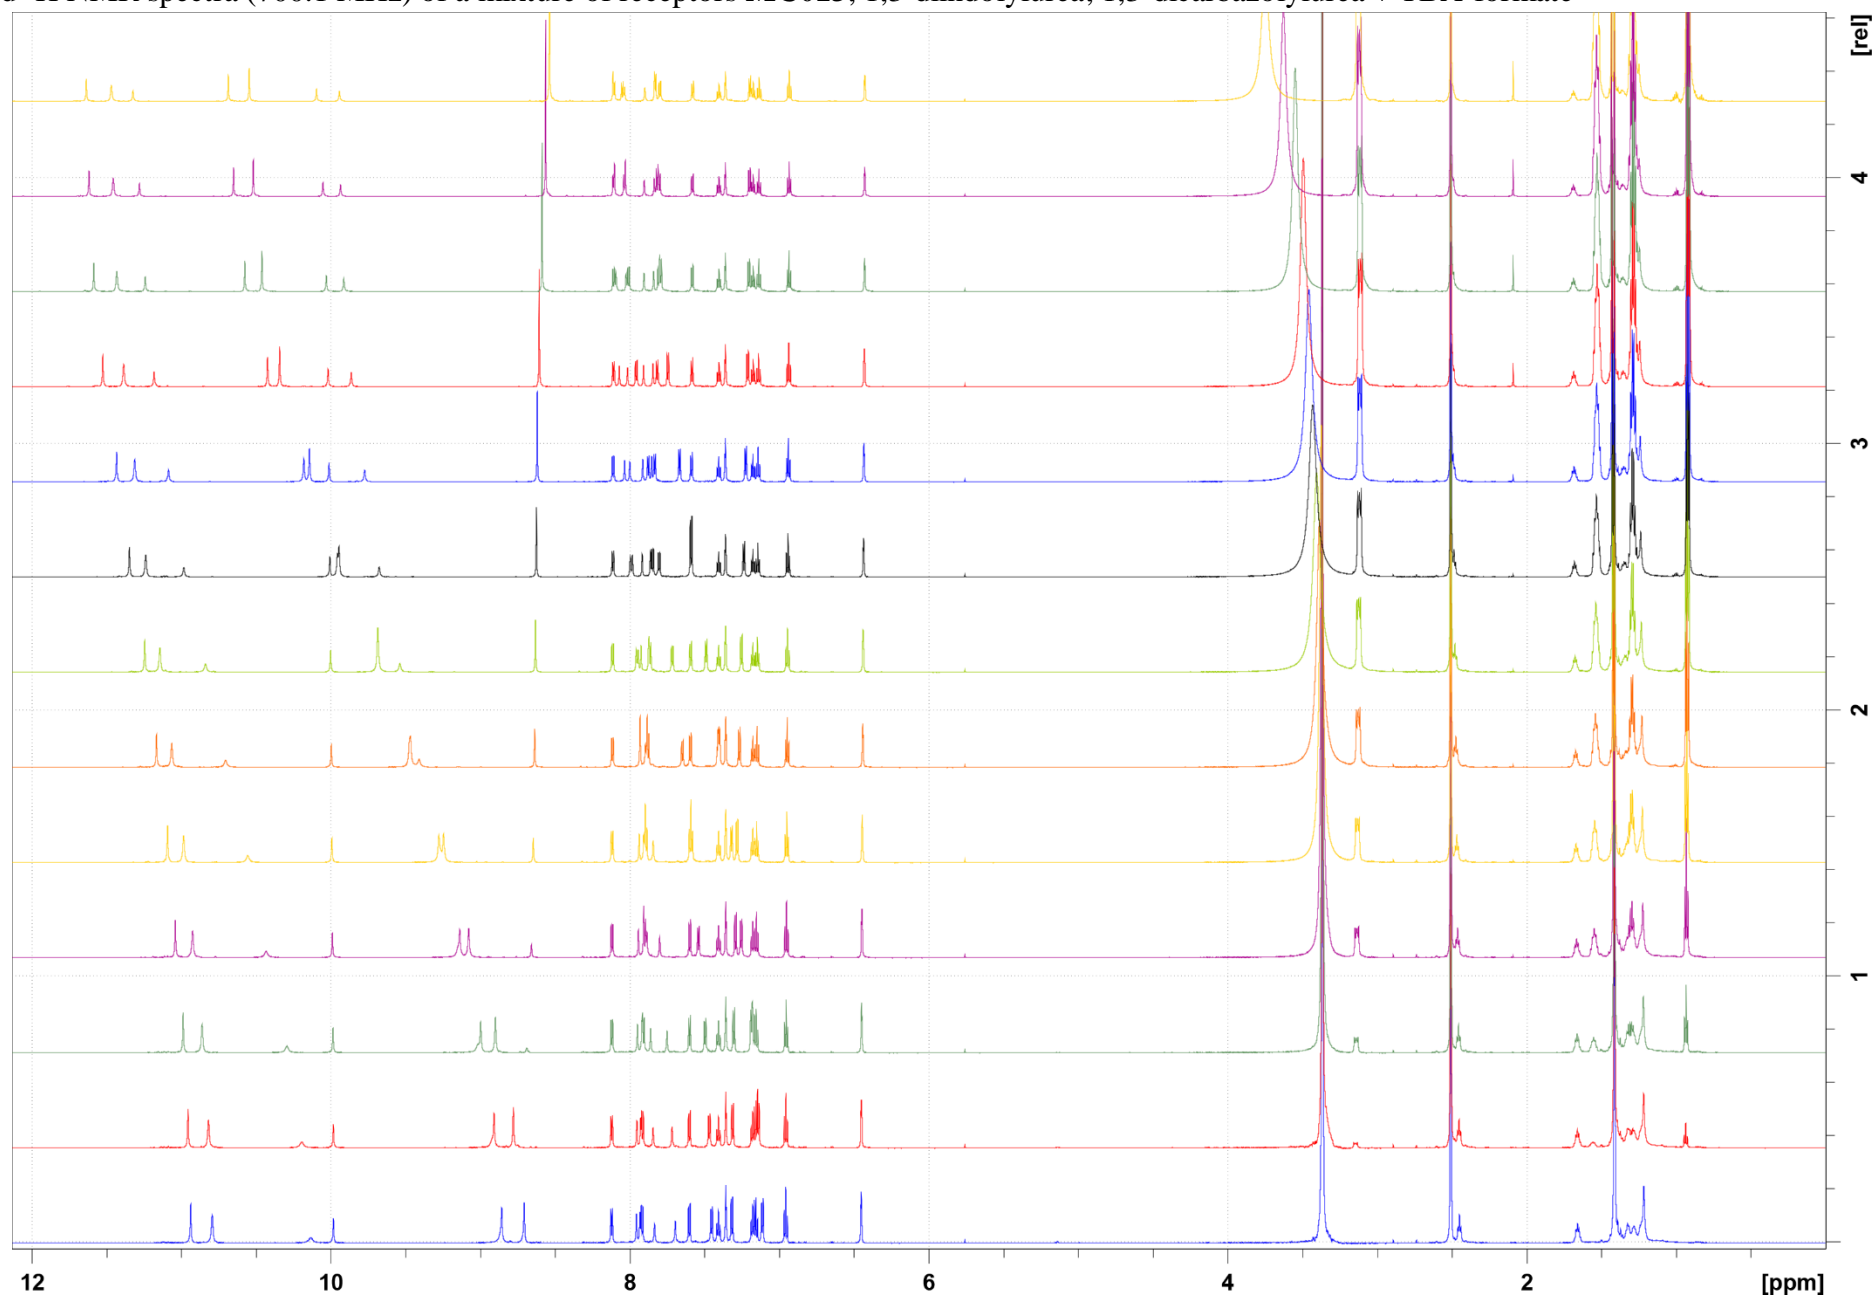

Stacked  $^1\text{H}$  NMR spectra (700.1 MHz) of a mixture of receptors **MC014**; 1,3-diindolylurea; 1,3-dicarbazolylurea + TBA-formate

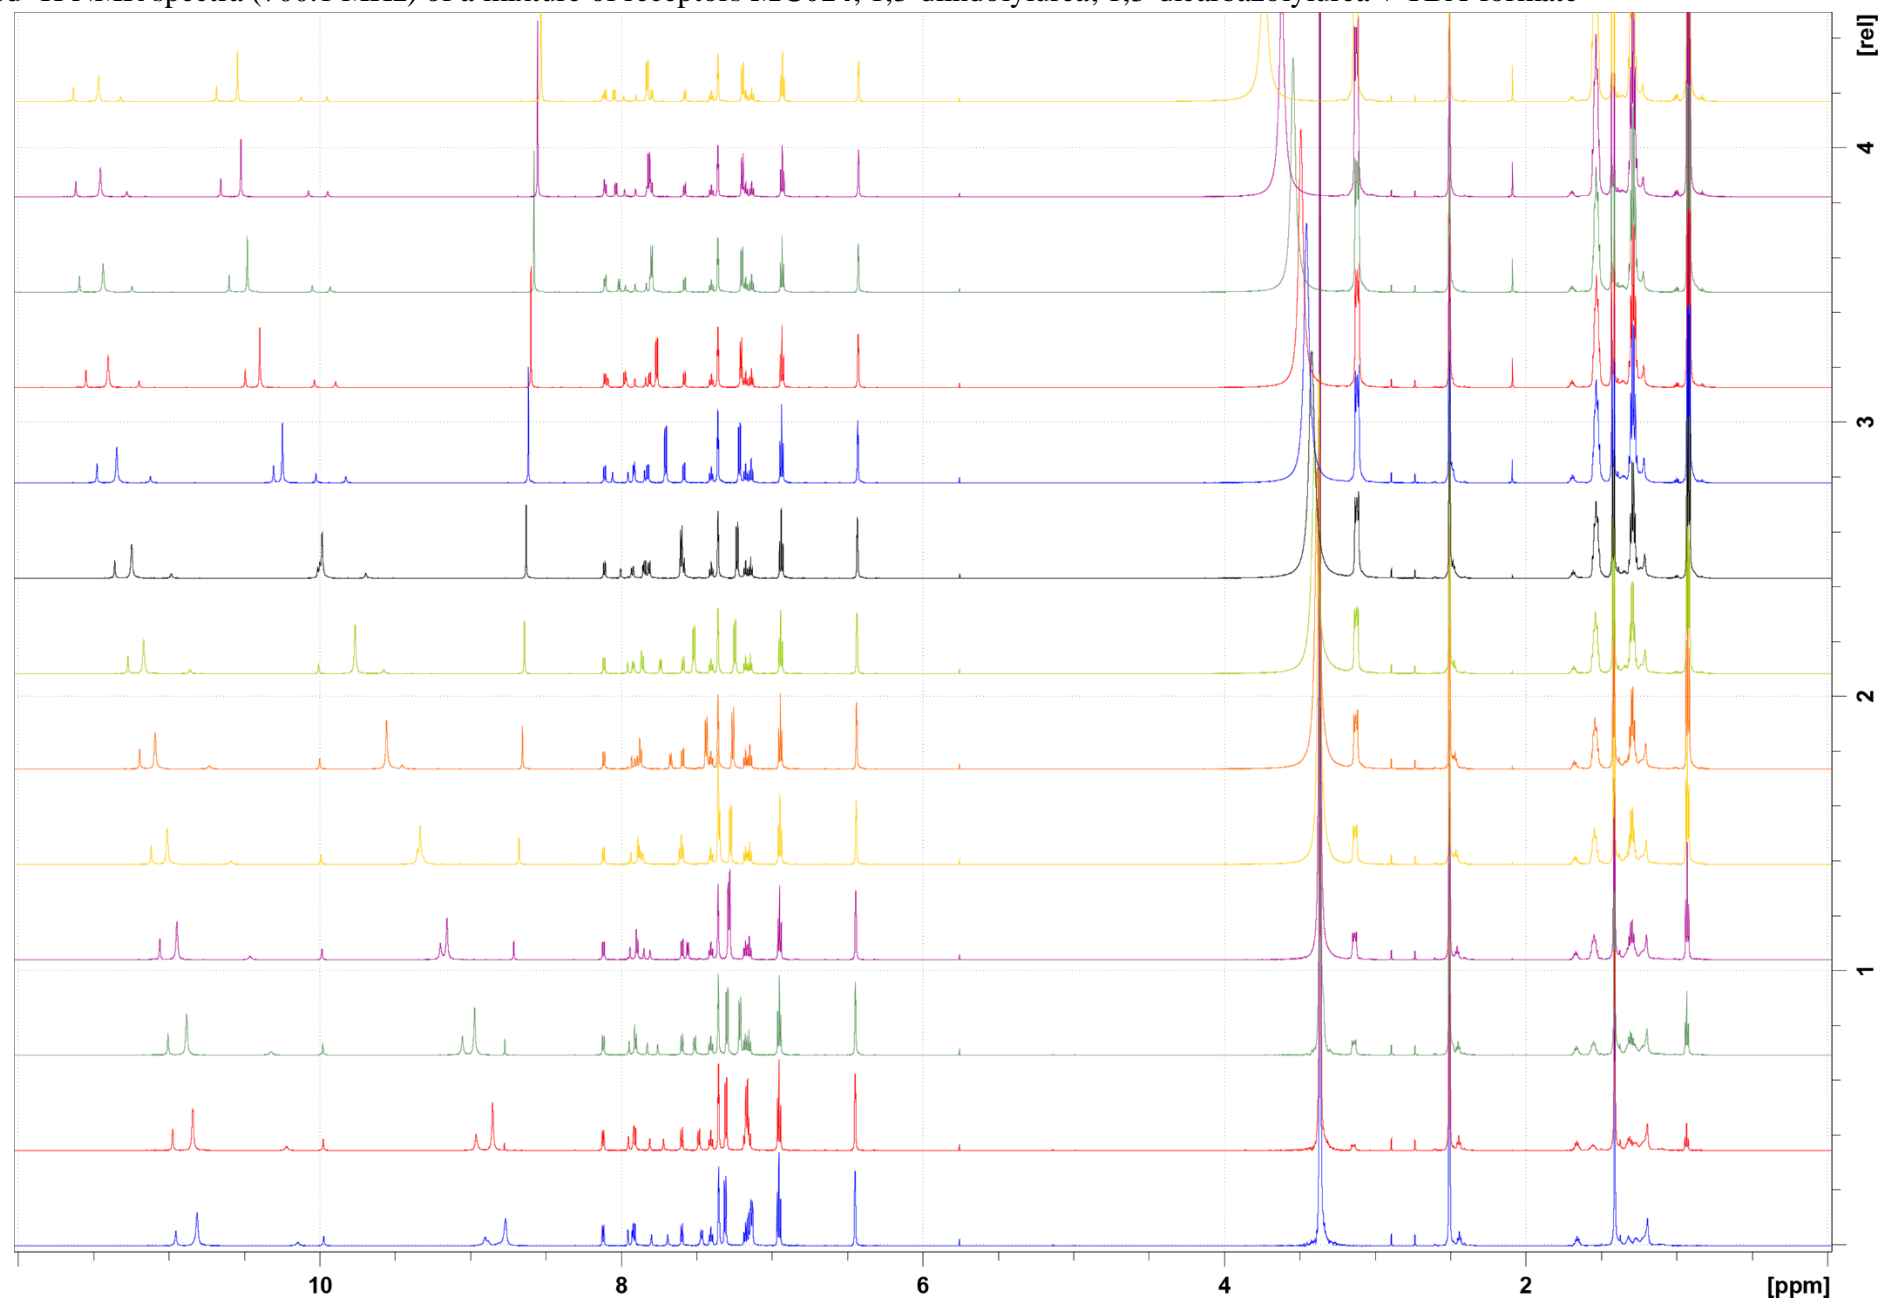

Stacked  $^1\text{H}$  NMR spectra (700.1 MHz) of a mixture of receptors **CZ016**; 1,3-diindolylurea; 1,3-dicarbazolylurea + TBA-lactate

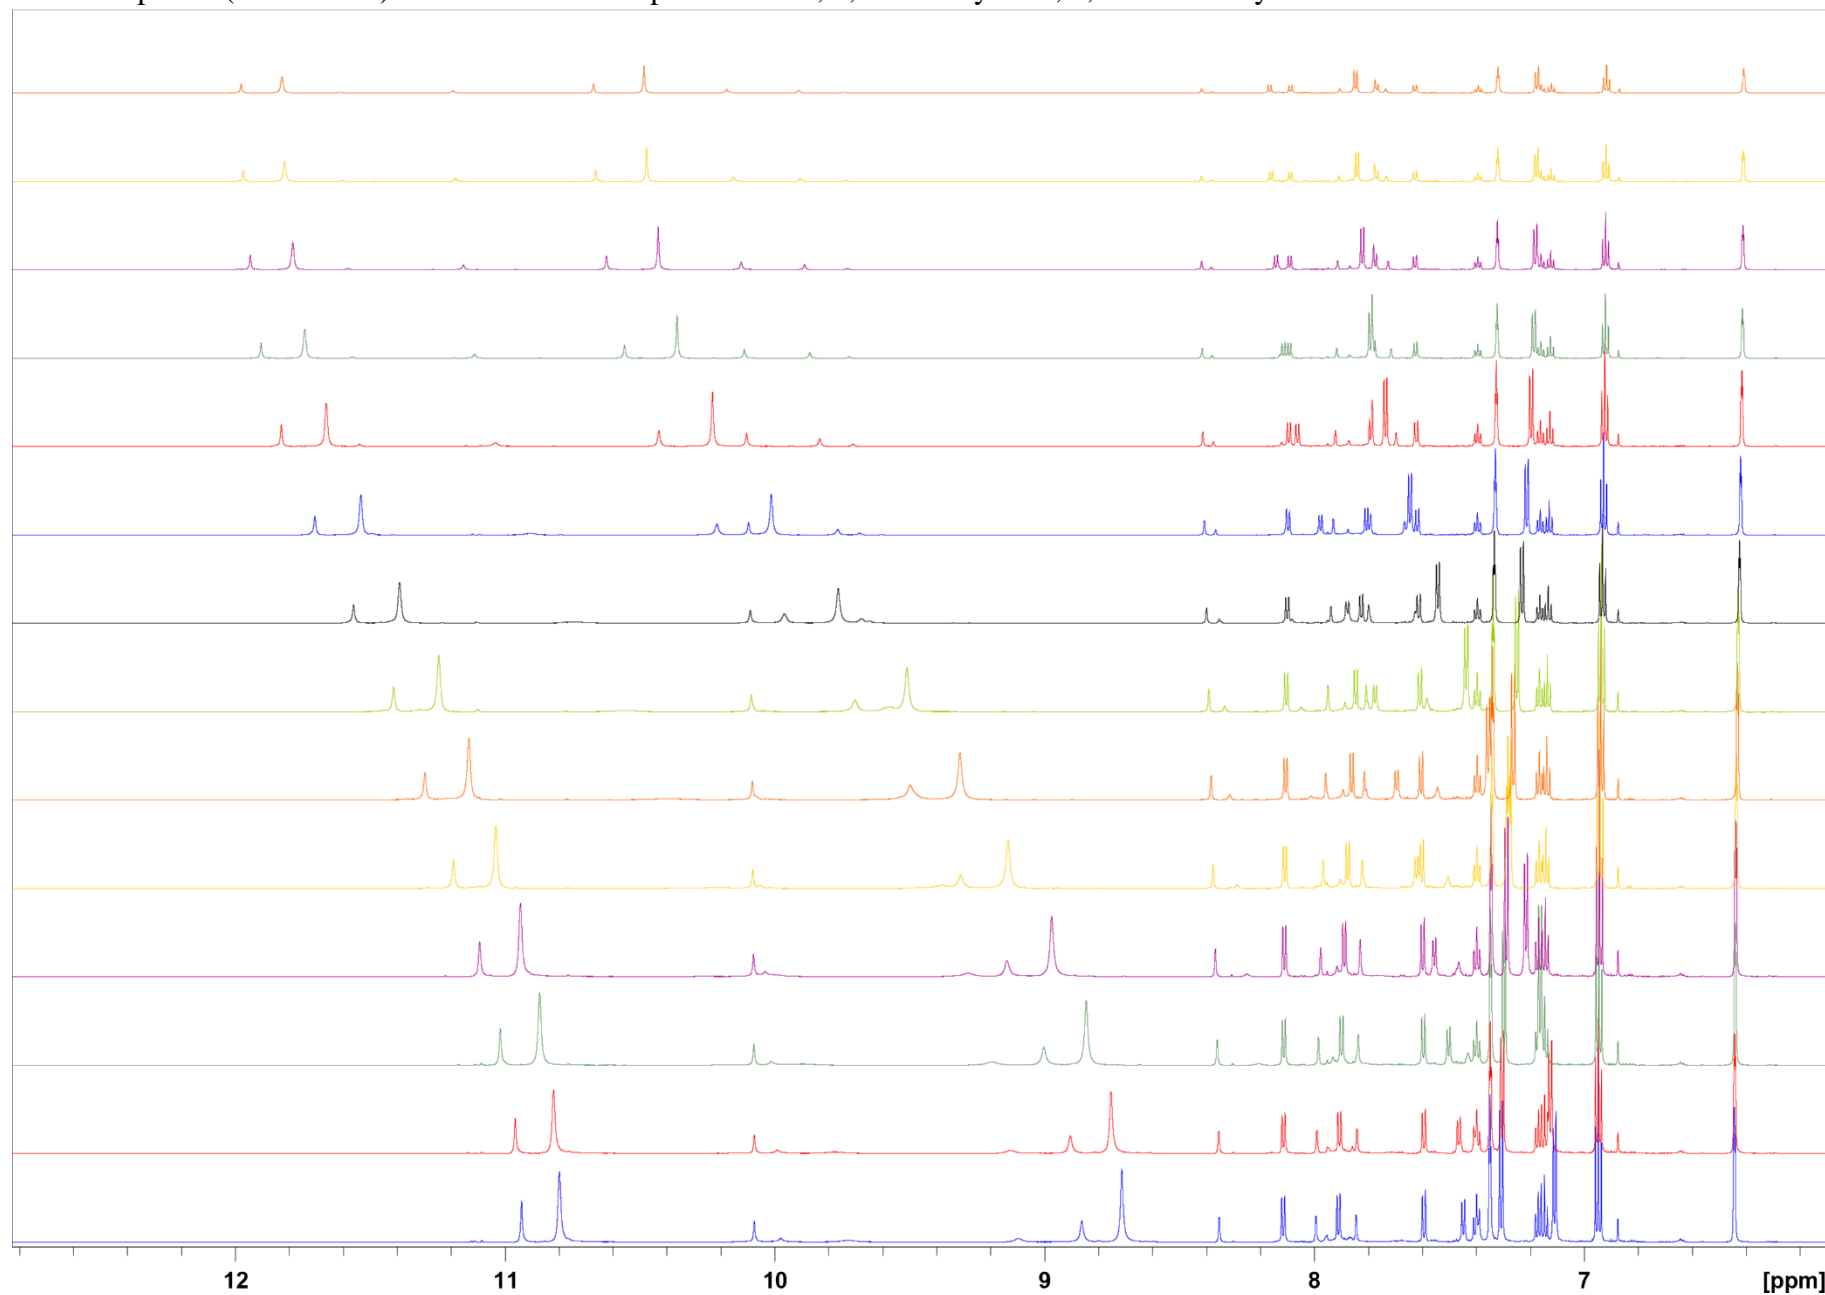

Stacked  $^1\text{H}$  NMR spectra (700.1 MHz) of a mixture of receptors **MC001**; 2,7-(COOBu) $_2$ -indolocarbazole; 2,9-(COOBu) $_2$ -indolocarbazole + TBA-lactate

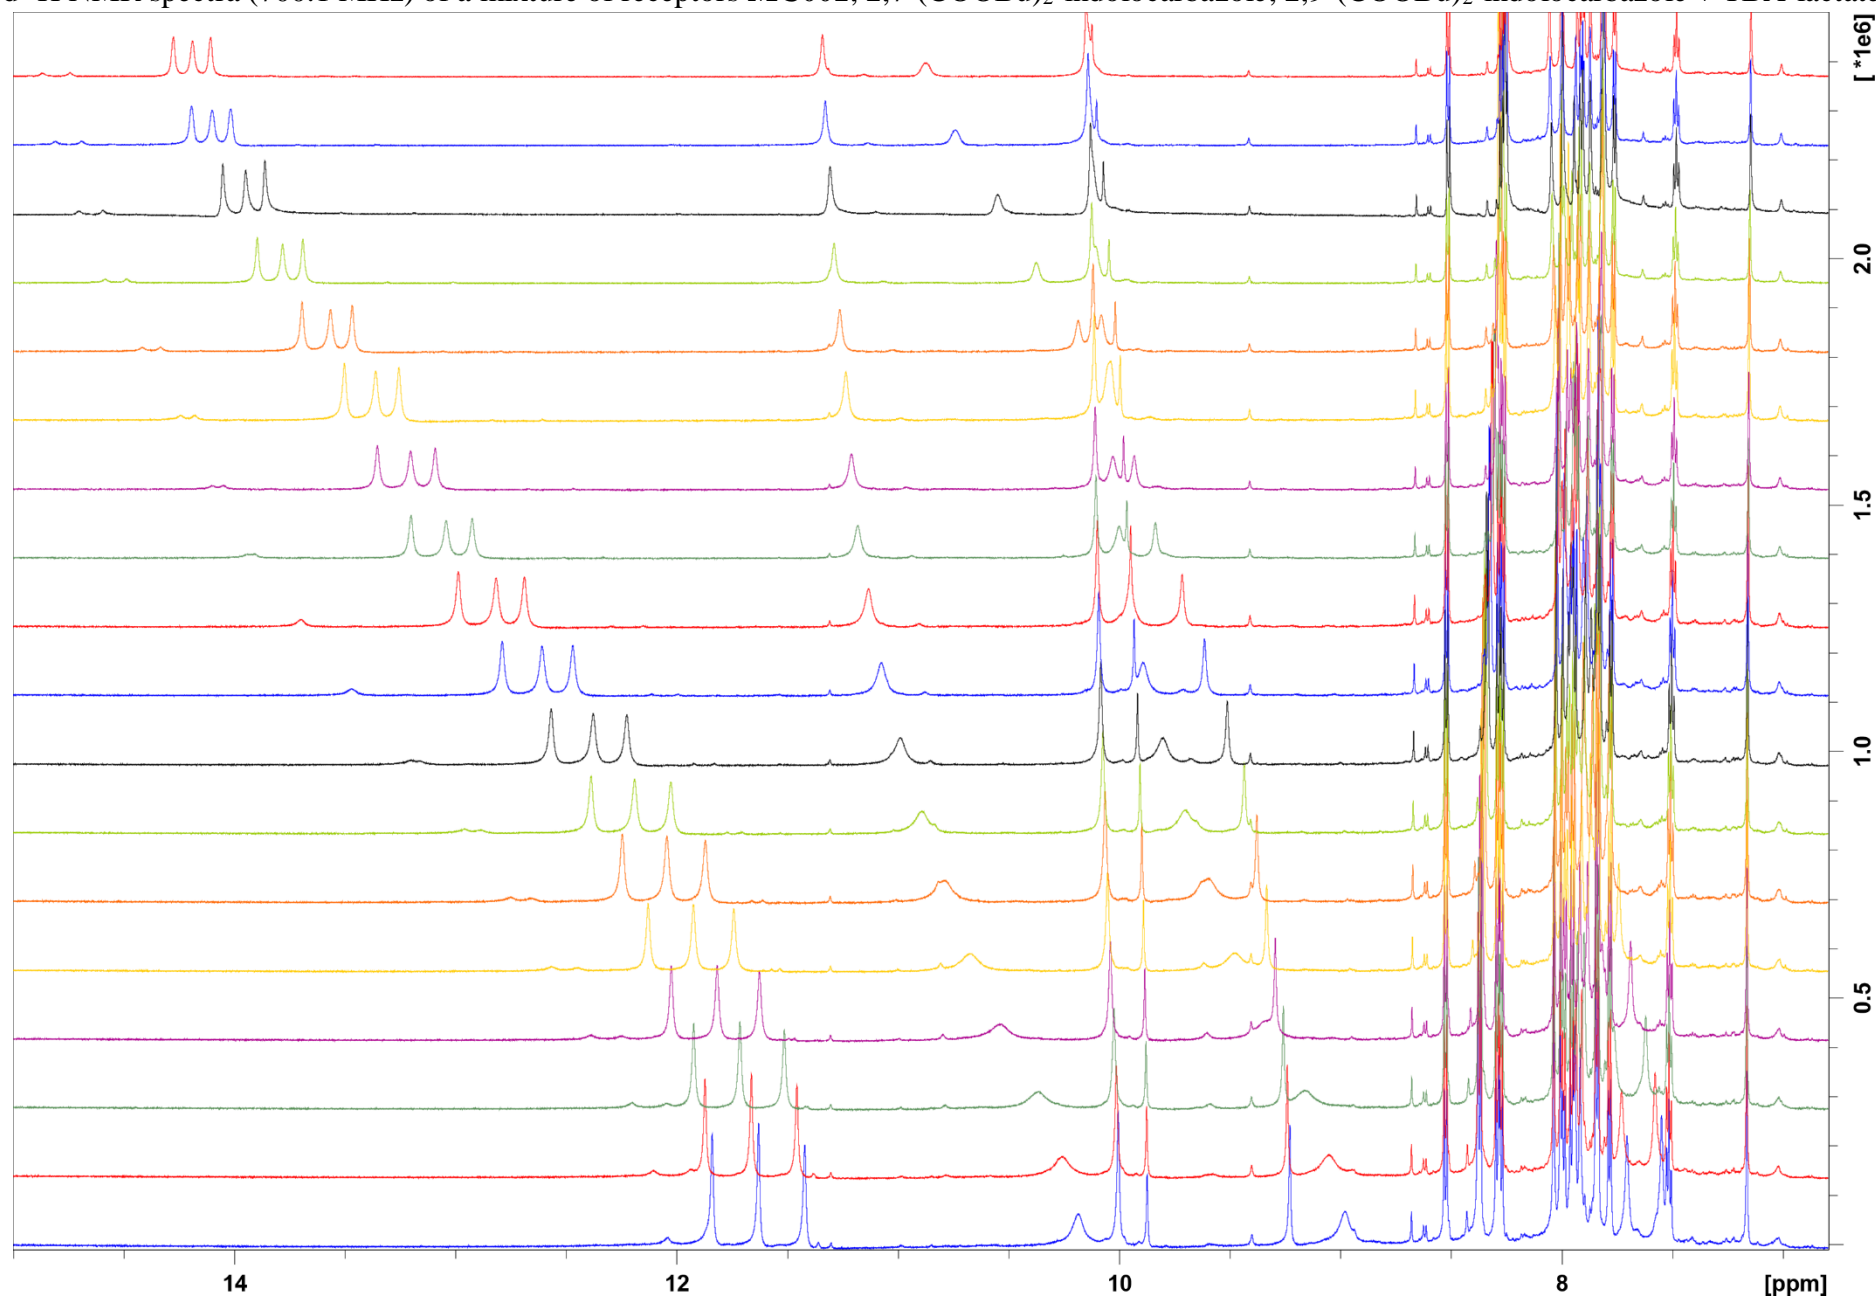

Stacked  $^1\text{H}$  NMR spectra (700.1 MHz) of a mixture of receptors **MC003**; 1,3-diindolylurea; 1,3-dicarbazolylurea + TBA-lactate

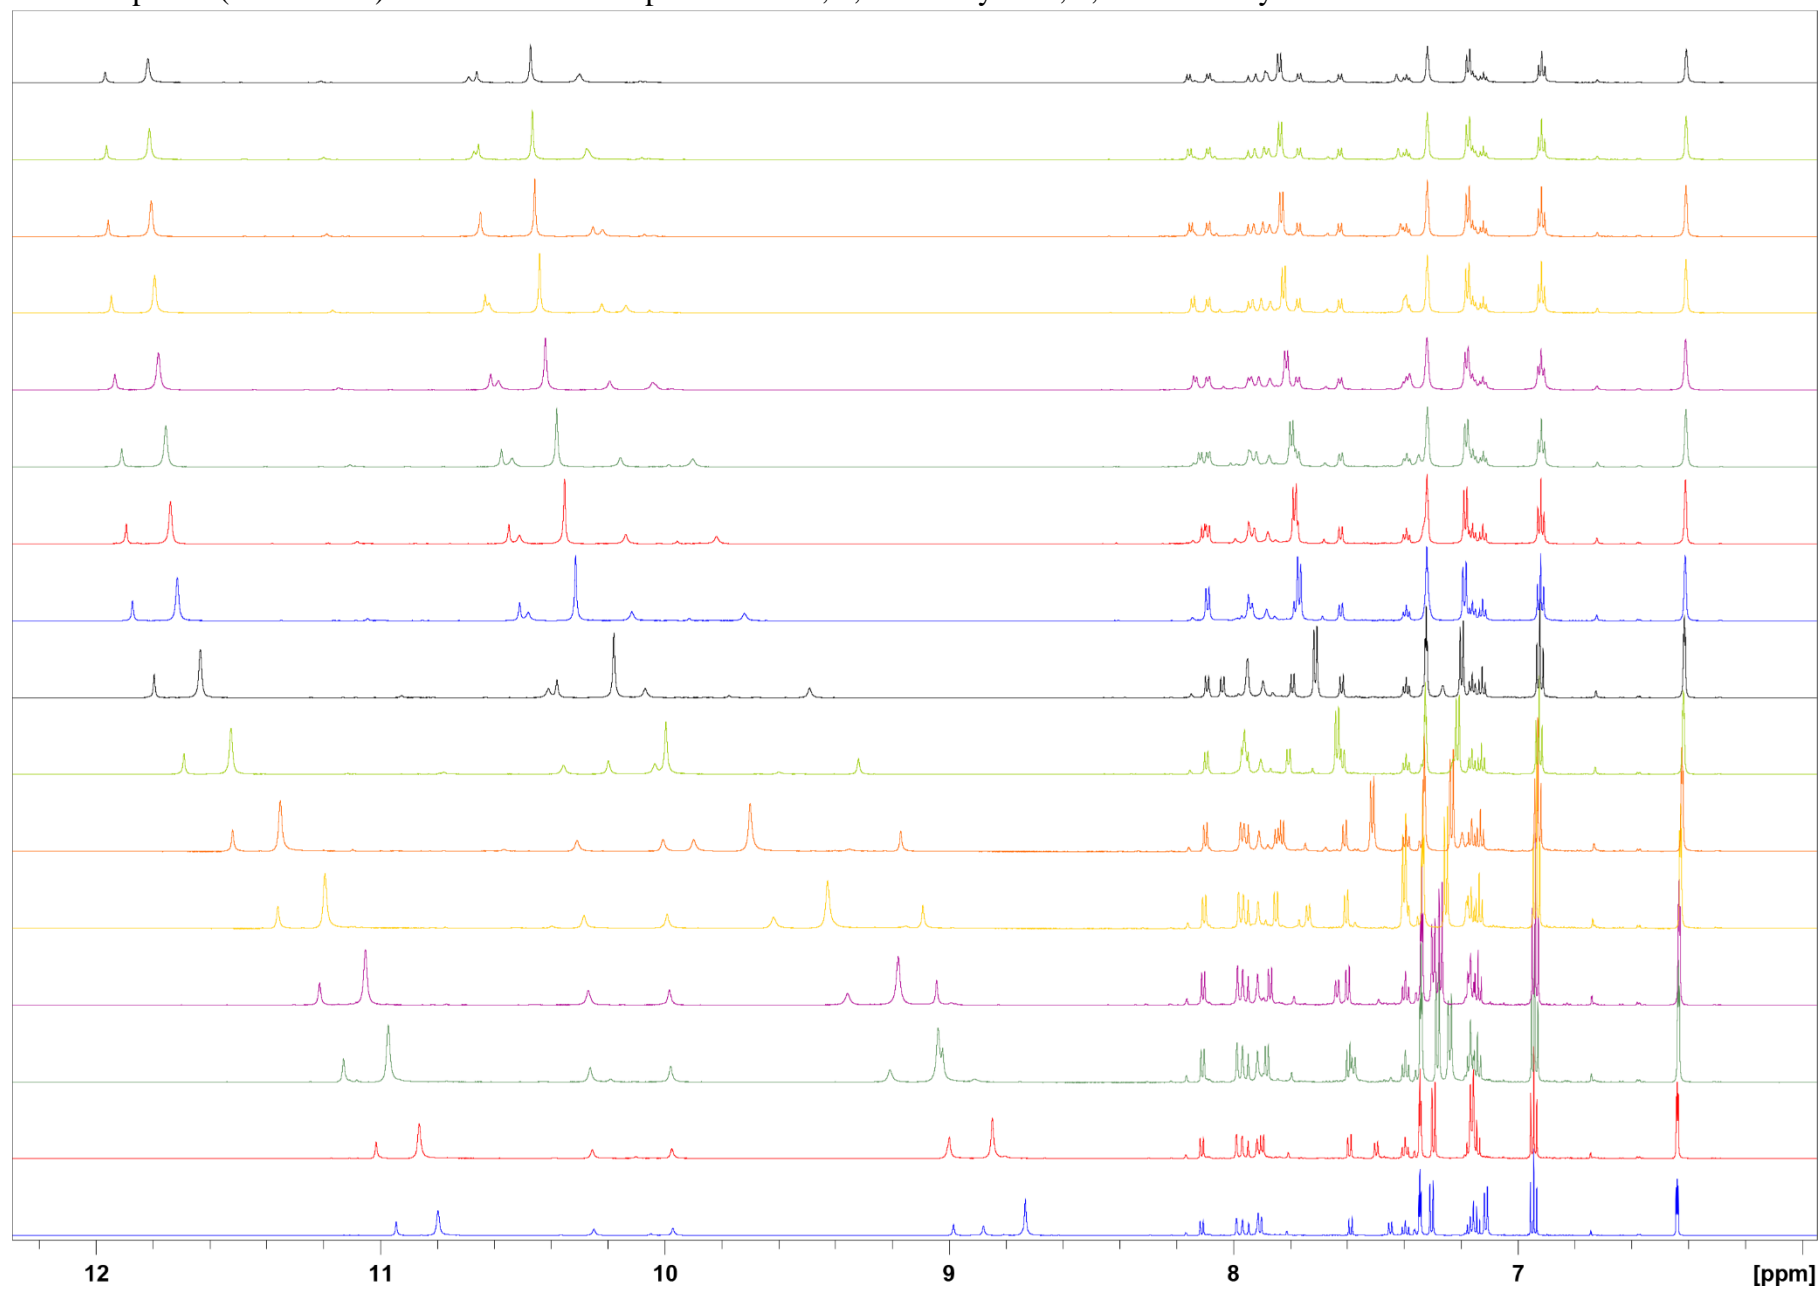

Stacked  $^1\text{H}$  NMR spectra (700.1 MHz) of a mixture of receptors **MC004**; 1,3-diindolylurea; 1,3-dicarbazolylurea + TBA-lactate

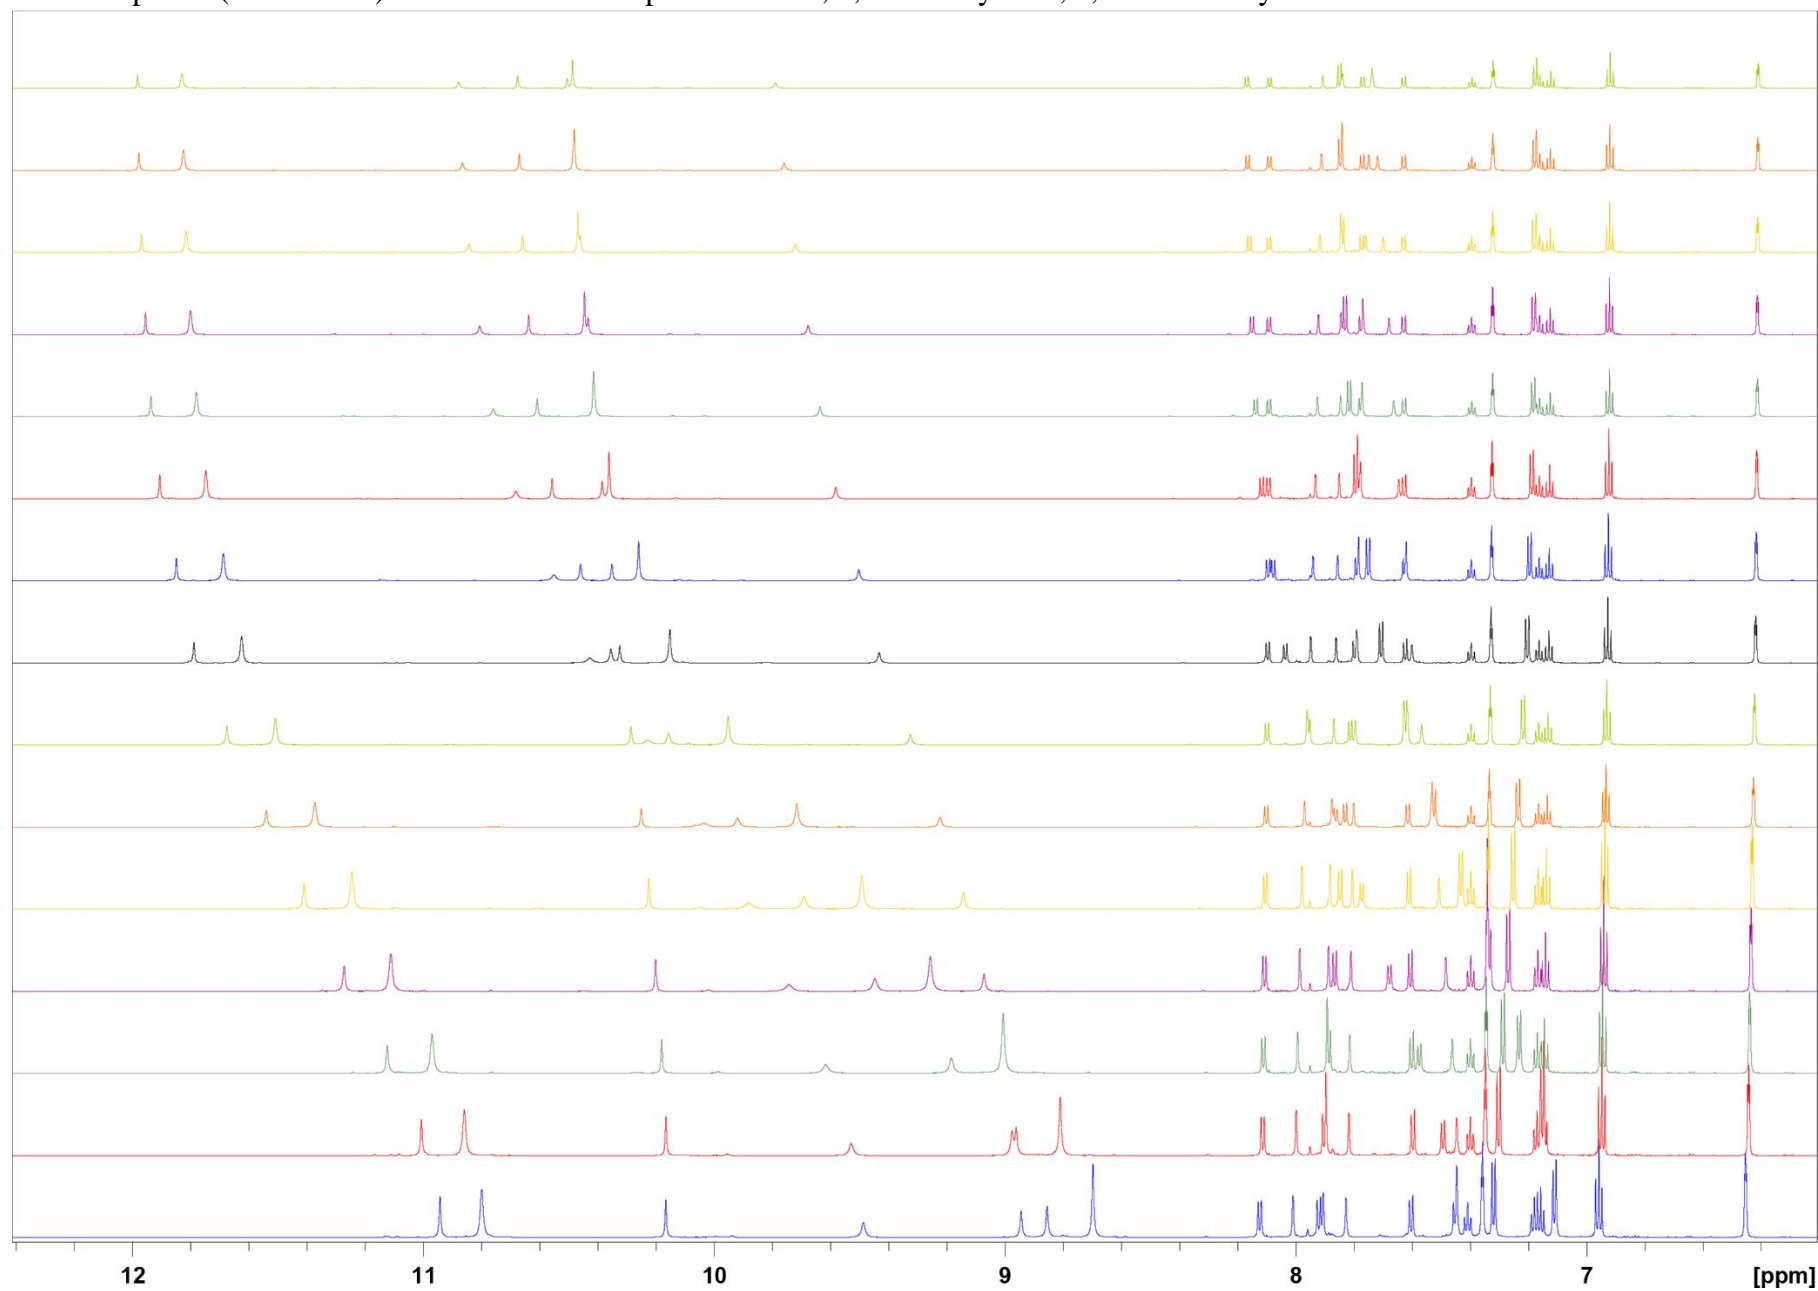

Stacked  $^1\text{H}$  NMR spectra (700.1 MHz) of a mixture of receptors **MC005**; 1,3-diindolylurea; 1,3-dicarbazolylurea + TBA-lactate

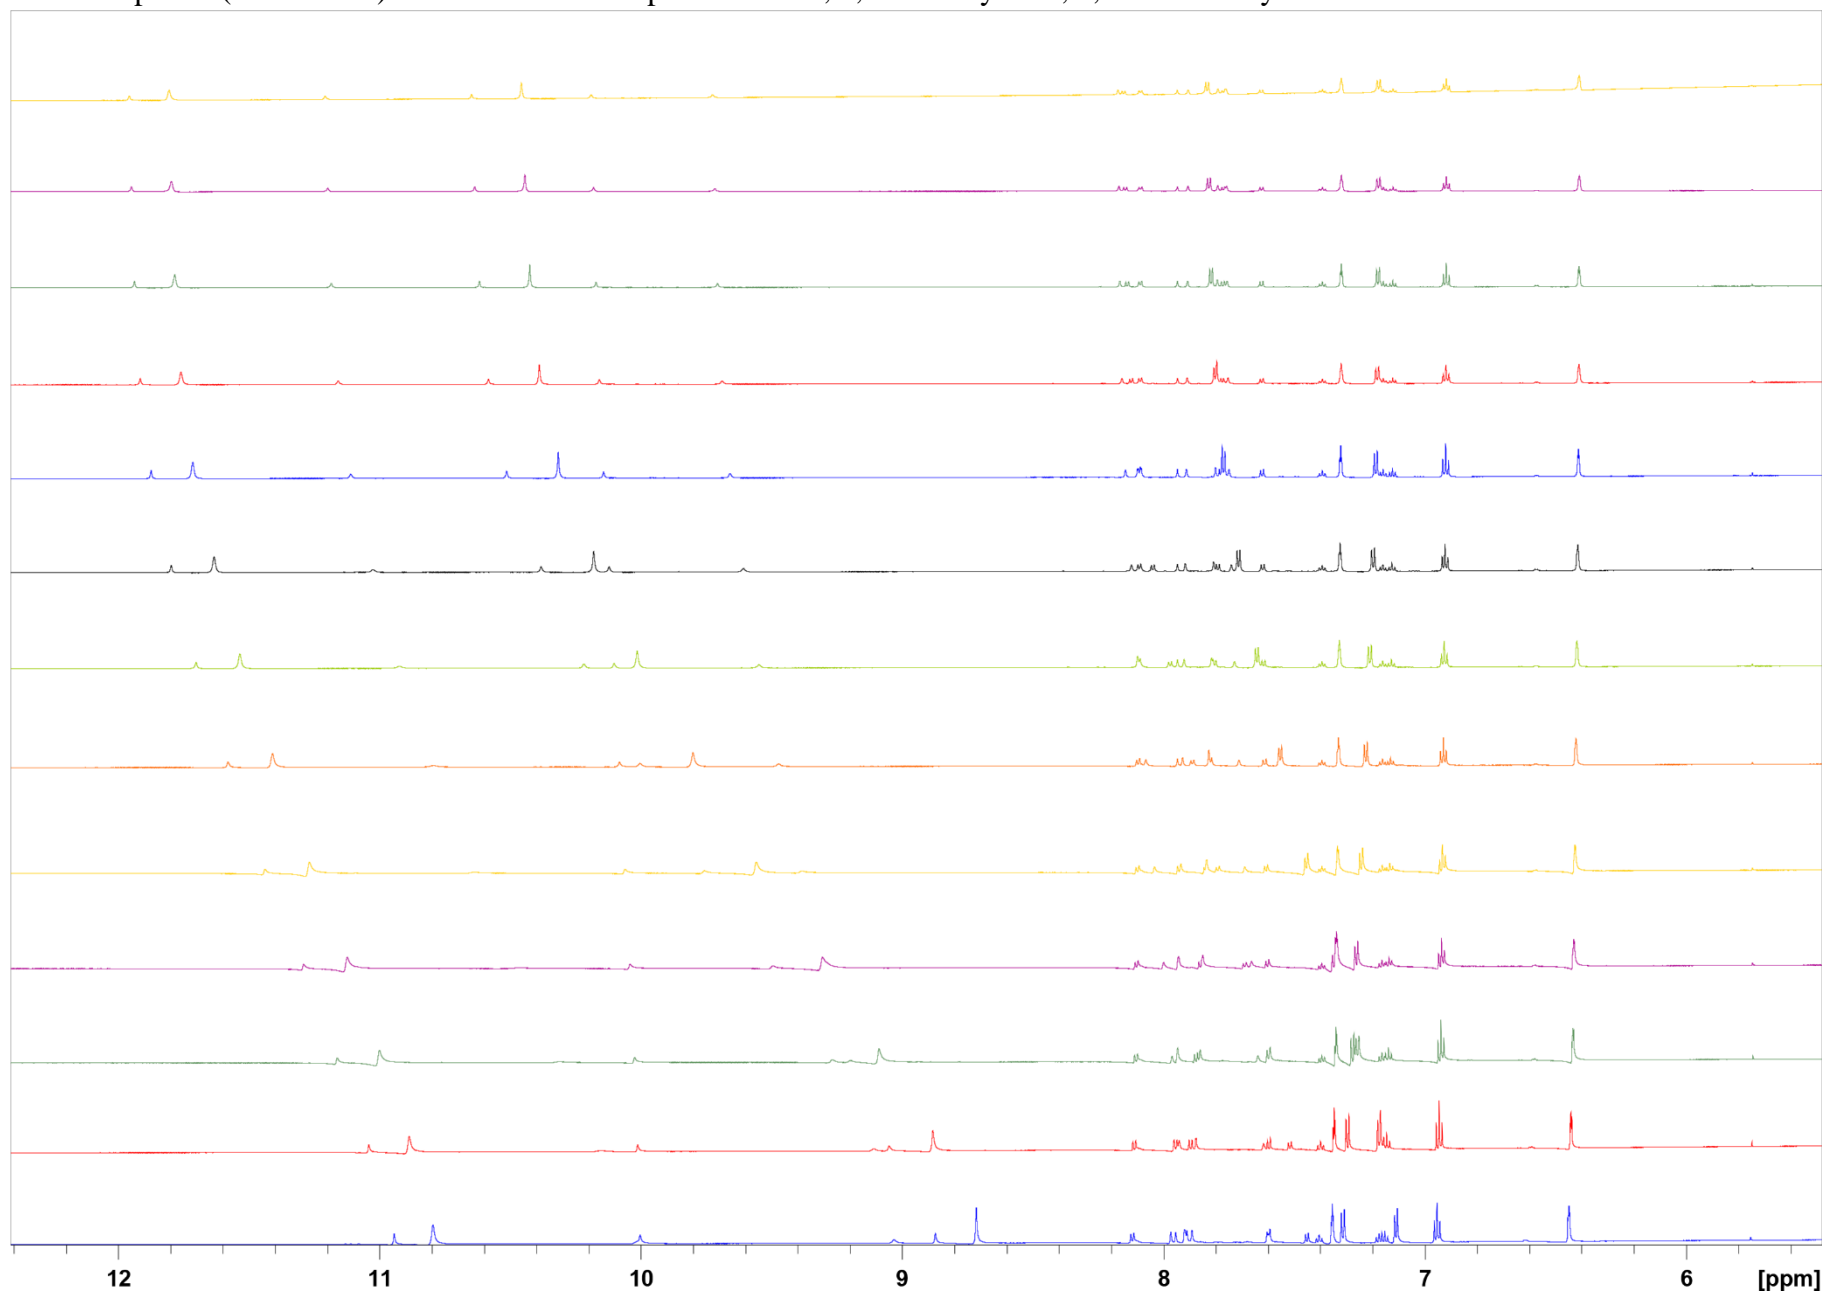



Stacked  $^1\text{H}$  NMR spectra (700.1 MHz) of a mixture of receptors **MC006**; 1,3-diindolylurea; 1,3-dicarbazolylurea + TBA-lactate

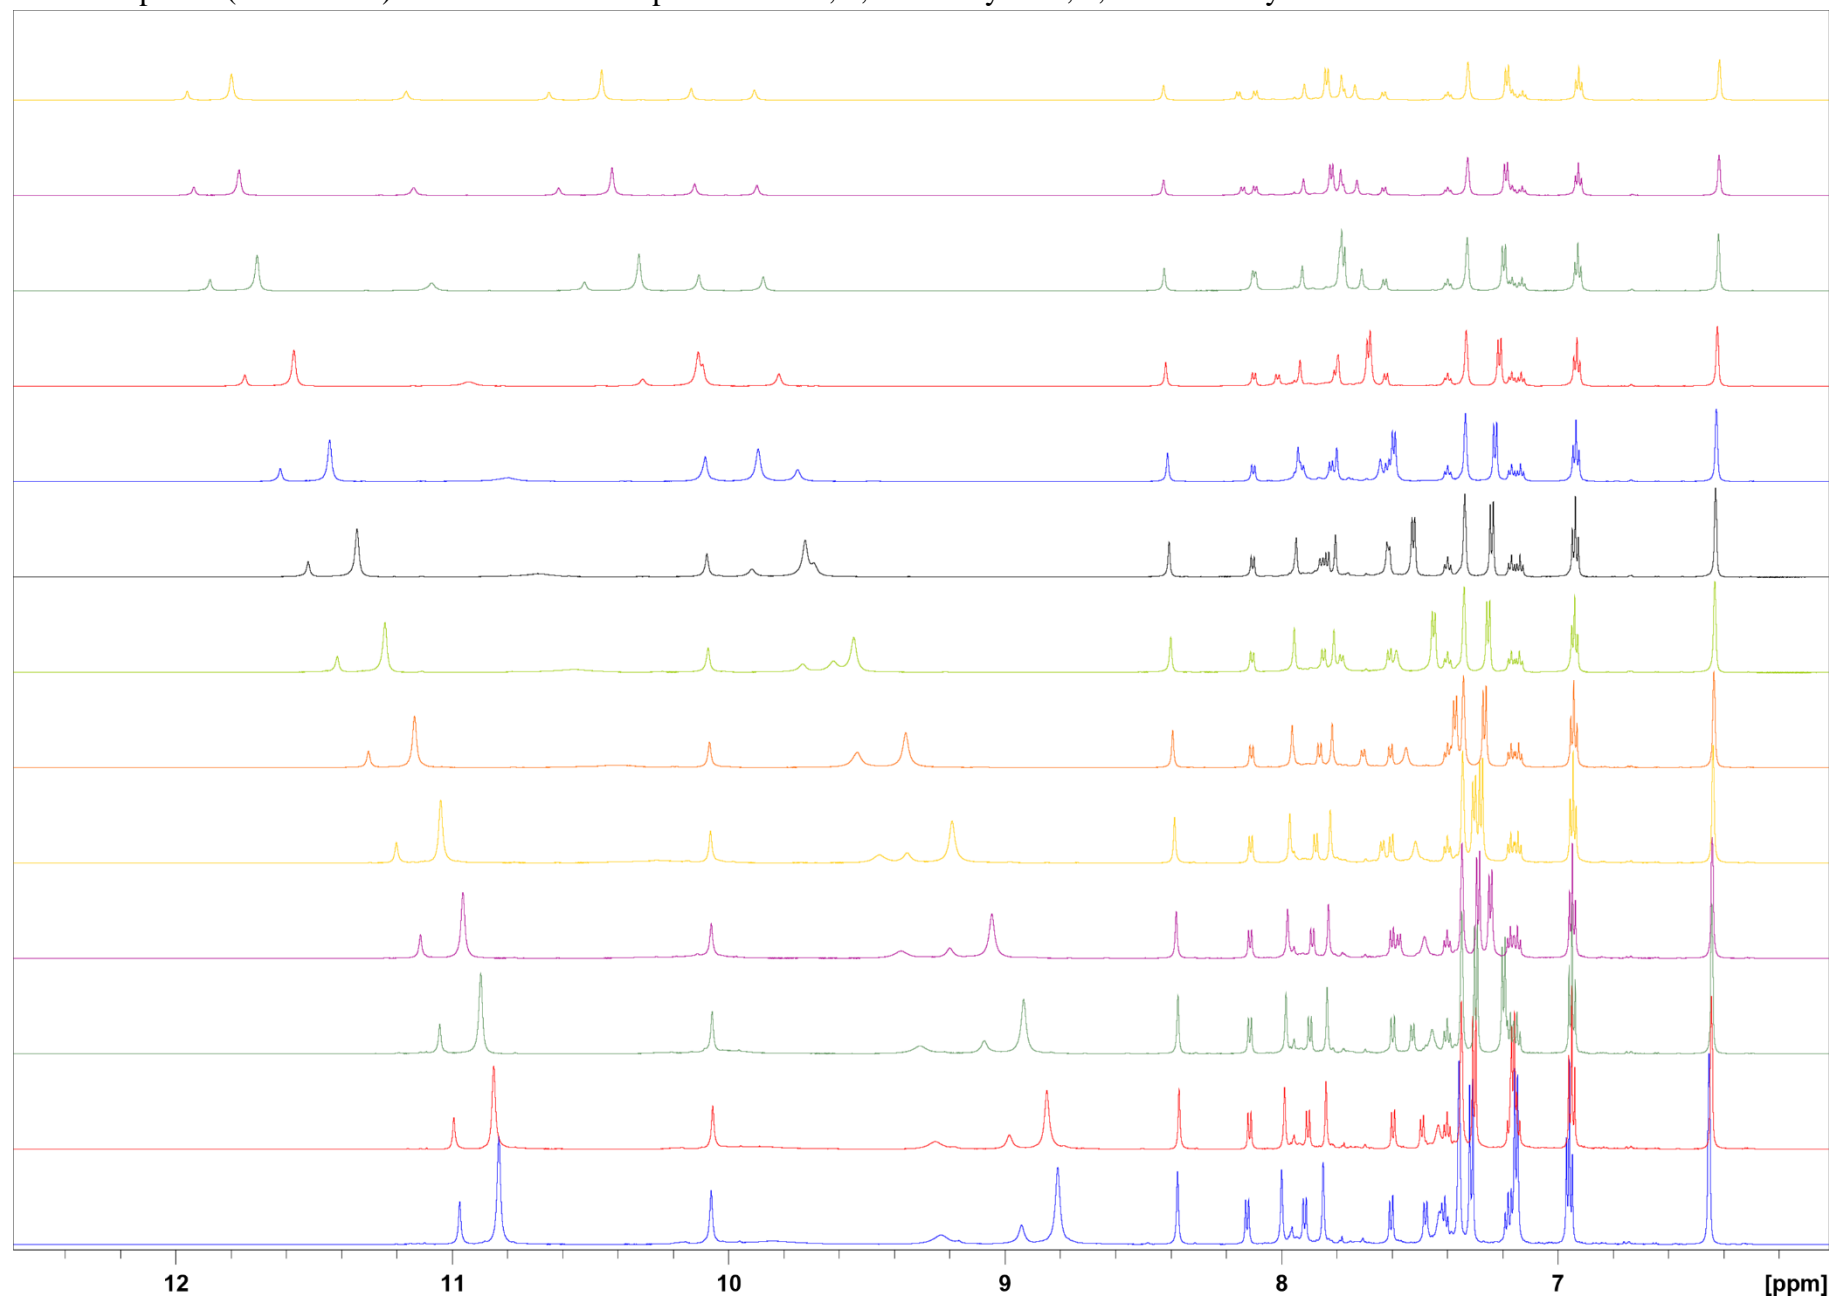

Stacked  $^1\text{H}$  NMR spectra (700.1 MHz) of a mixture of receptors **MC007**; 1,3-diindolylurea; 1,3-dicarbazolylurea + TBA-lactate

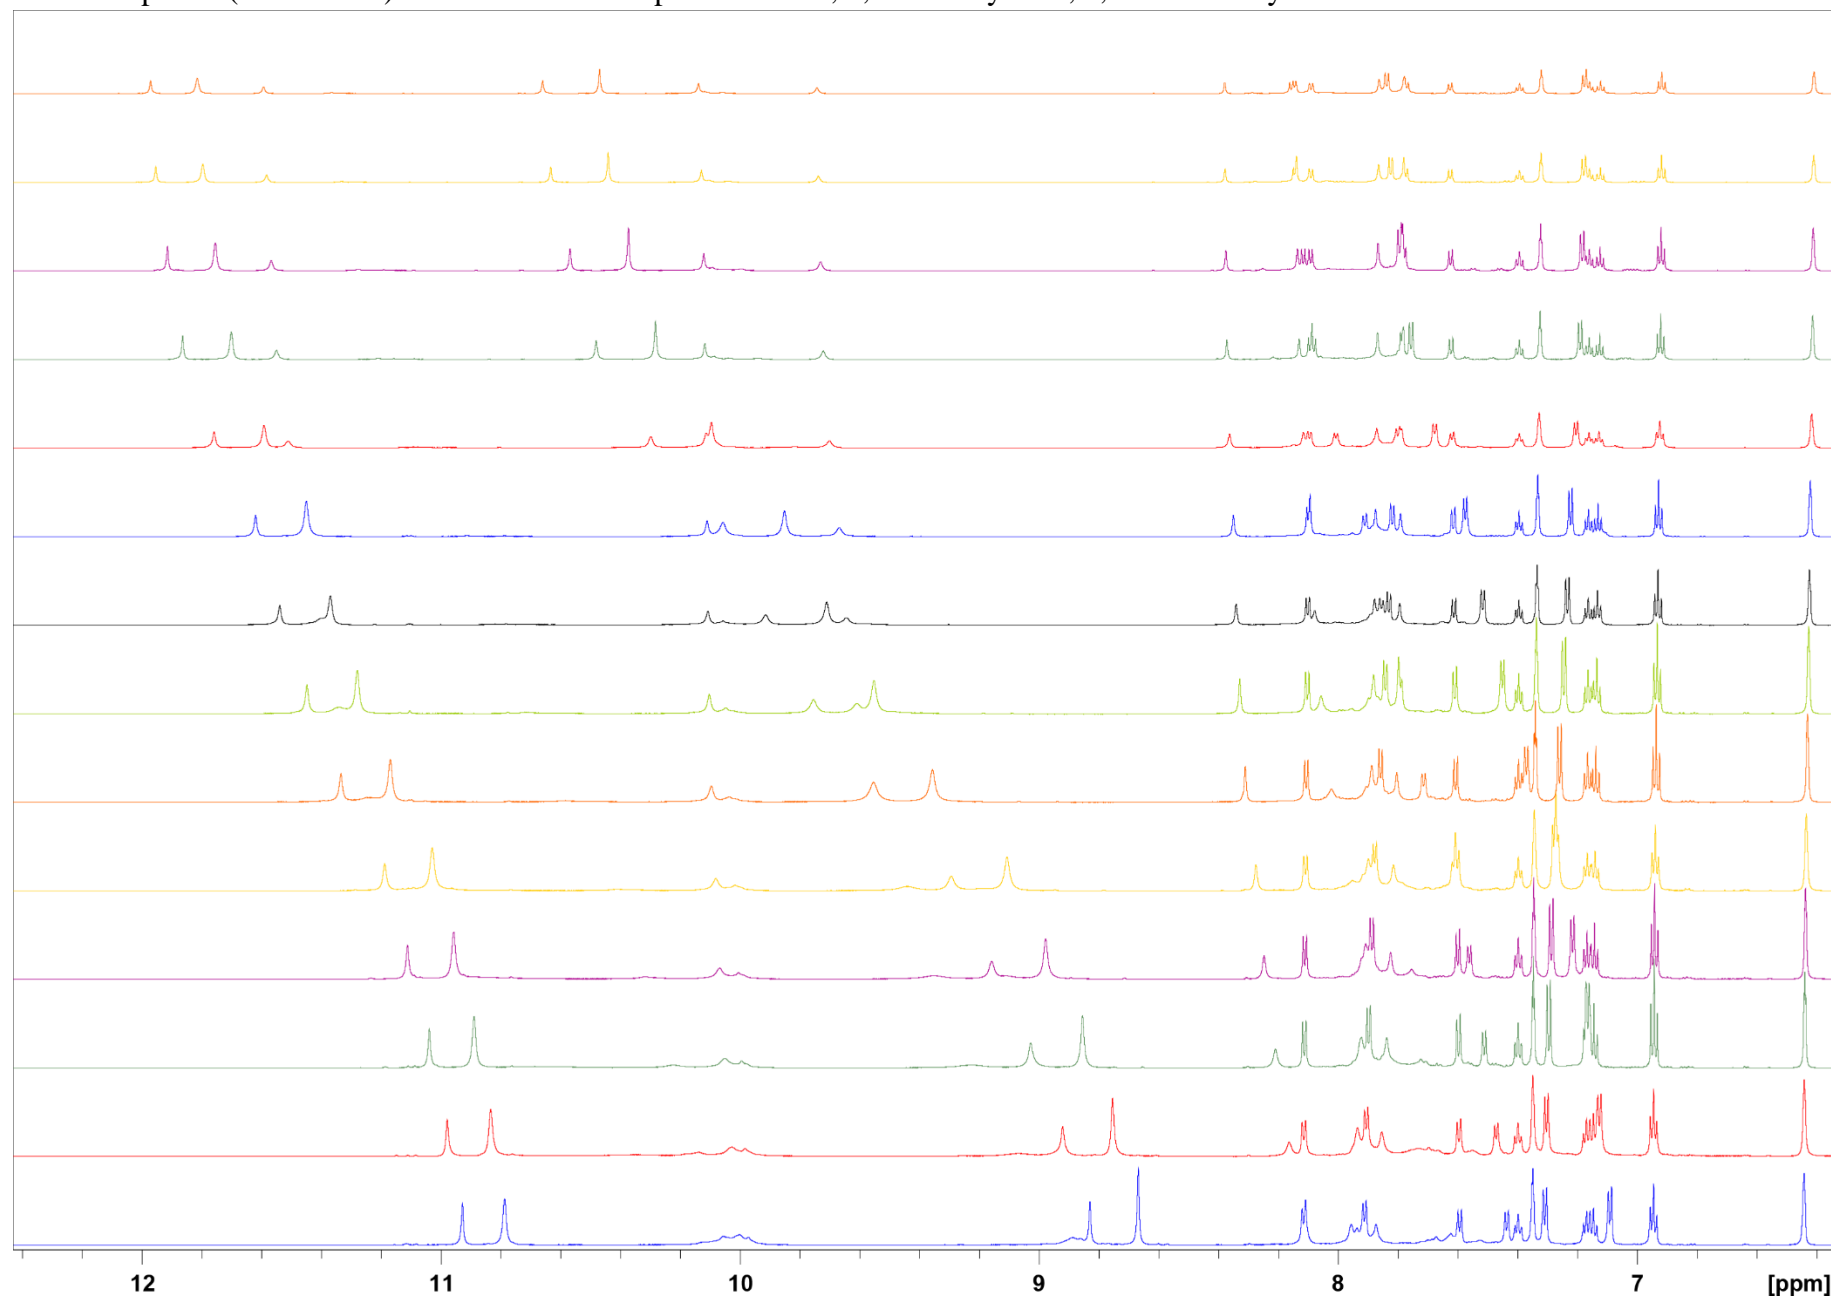

Stacked  $^1\text{H}$  NMR spectra (700.1 MHz) of a mixture of receptors **MC008**; 1,3-diindolylurea; 1,3-dicarbazolylurea + TBA-lactate

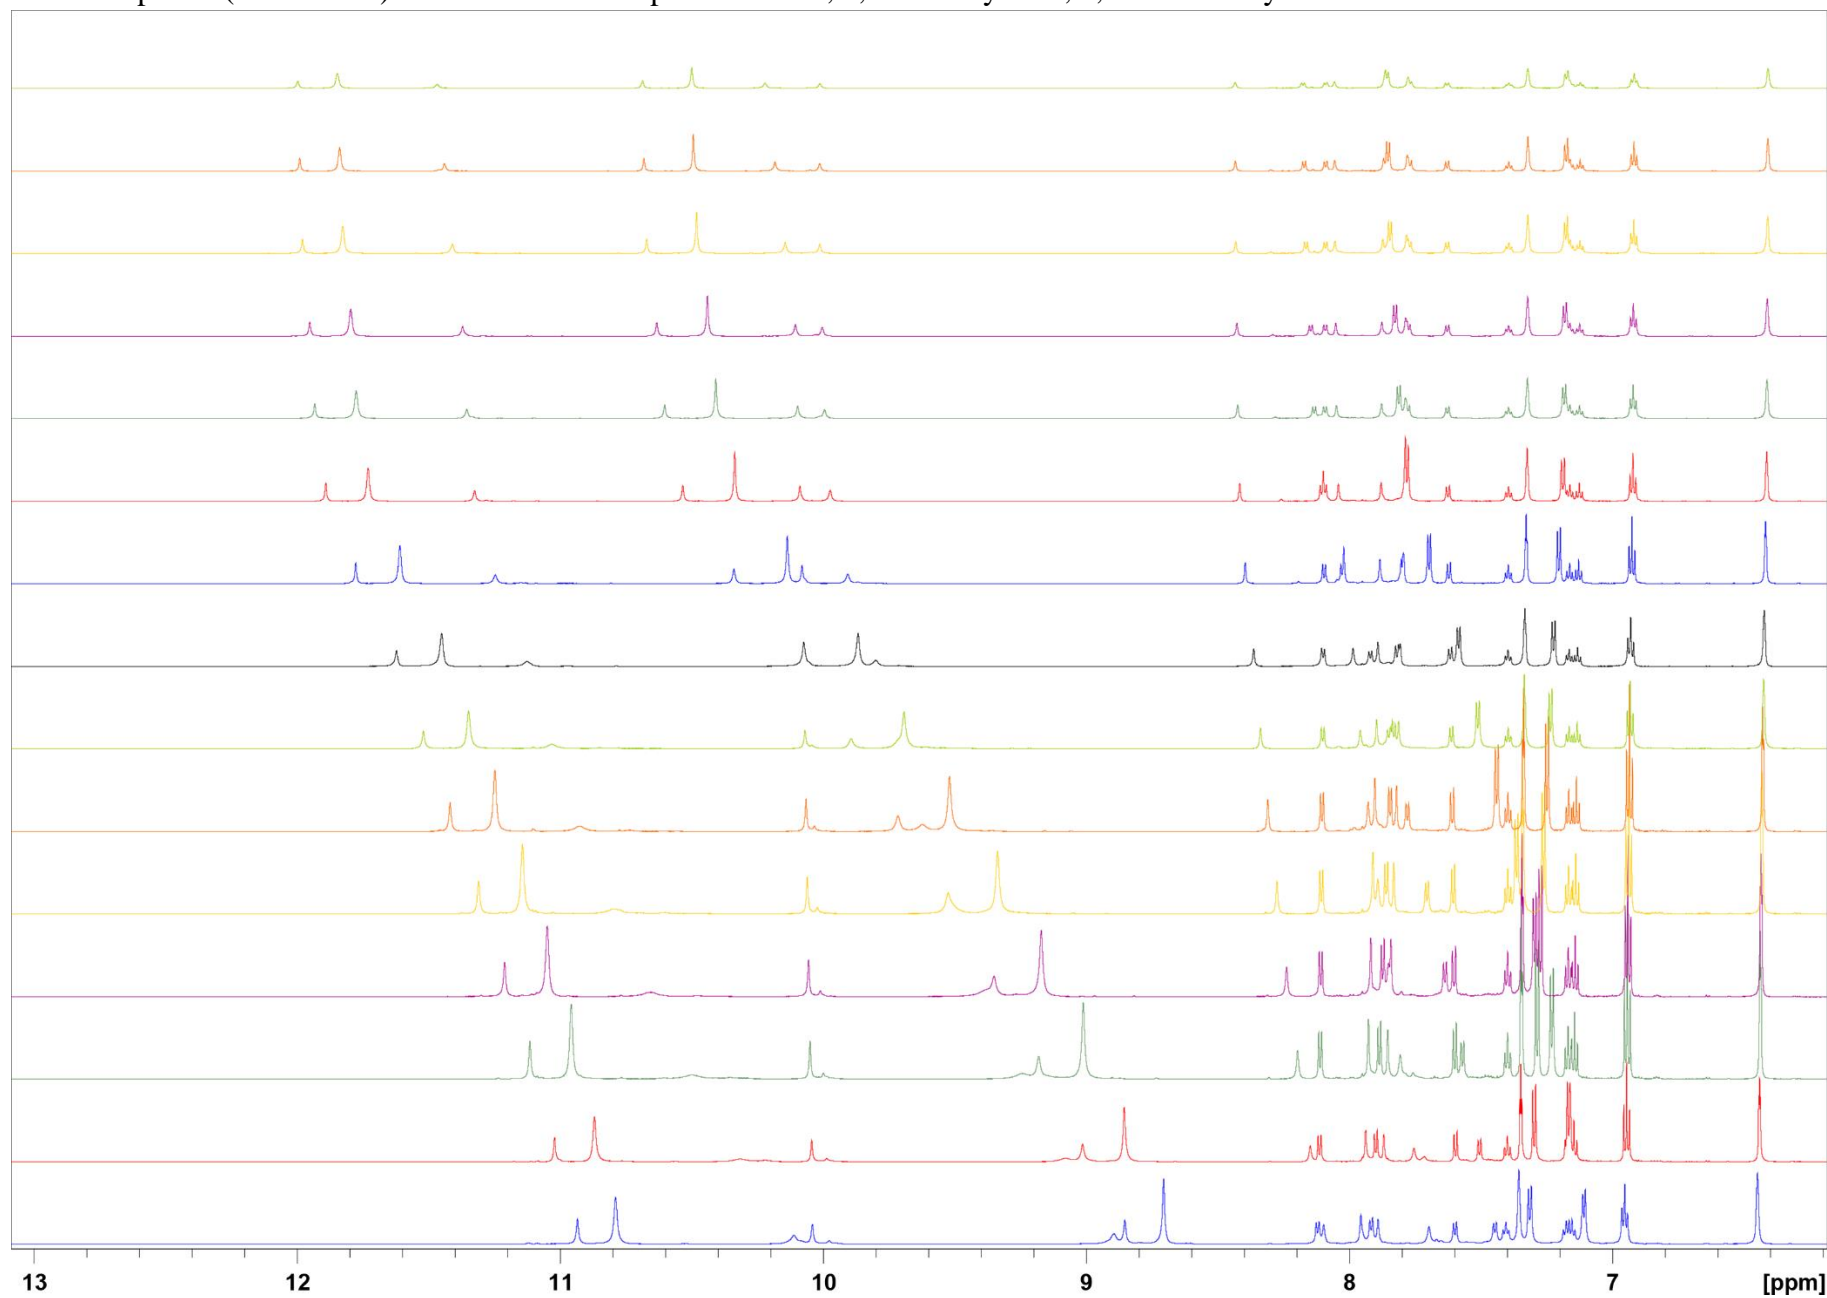

Stacked  $^1\text{H}$  NMR spectra (700.1 MHz) of a mixture of receptors **MC009**; 1,3-diindolylurea; 1,3-dicarbazolylurea + TBA-lactate

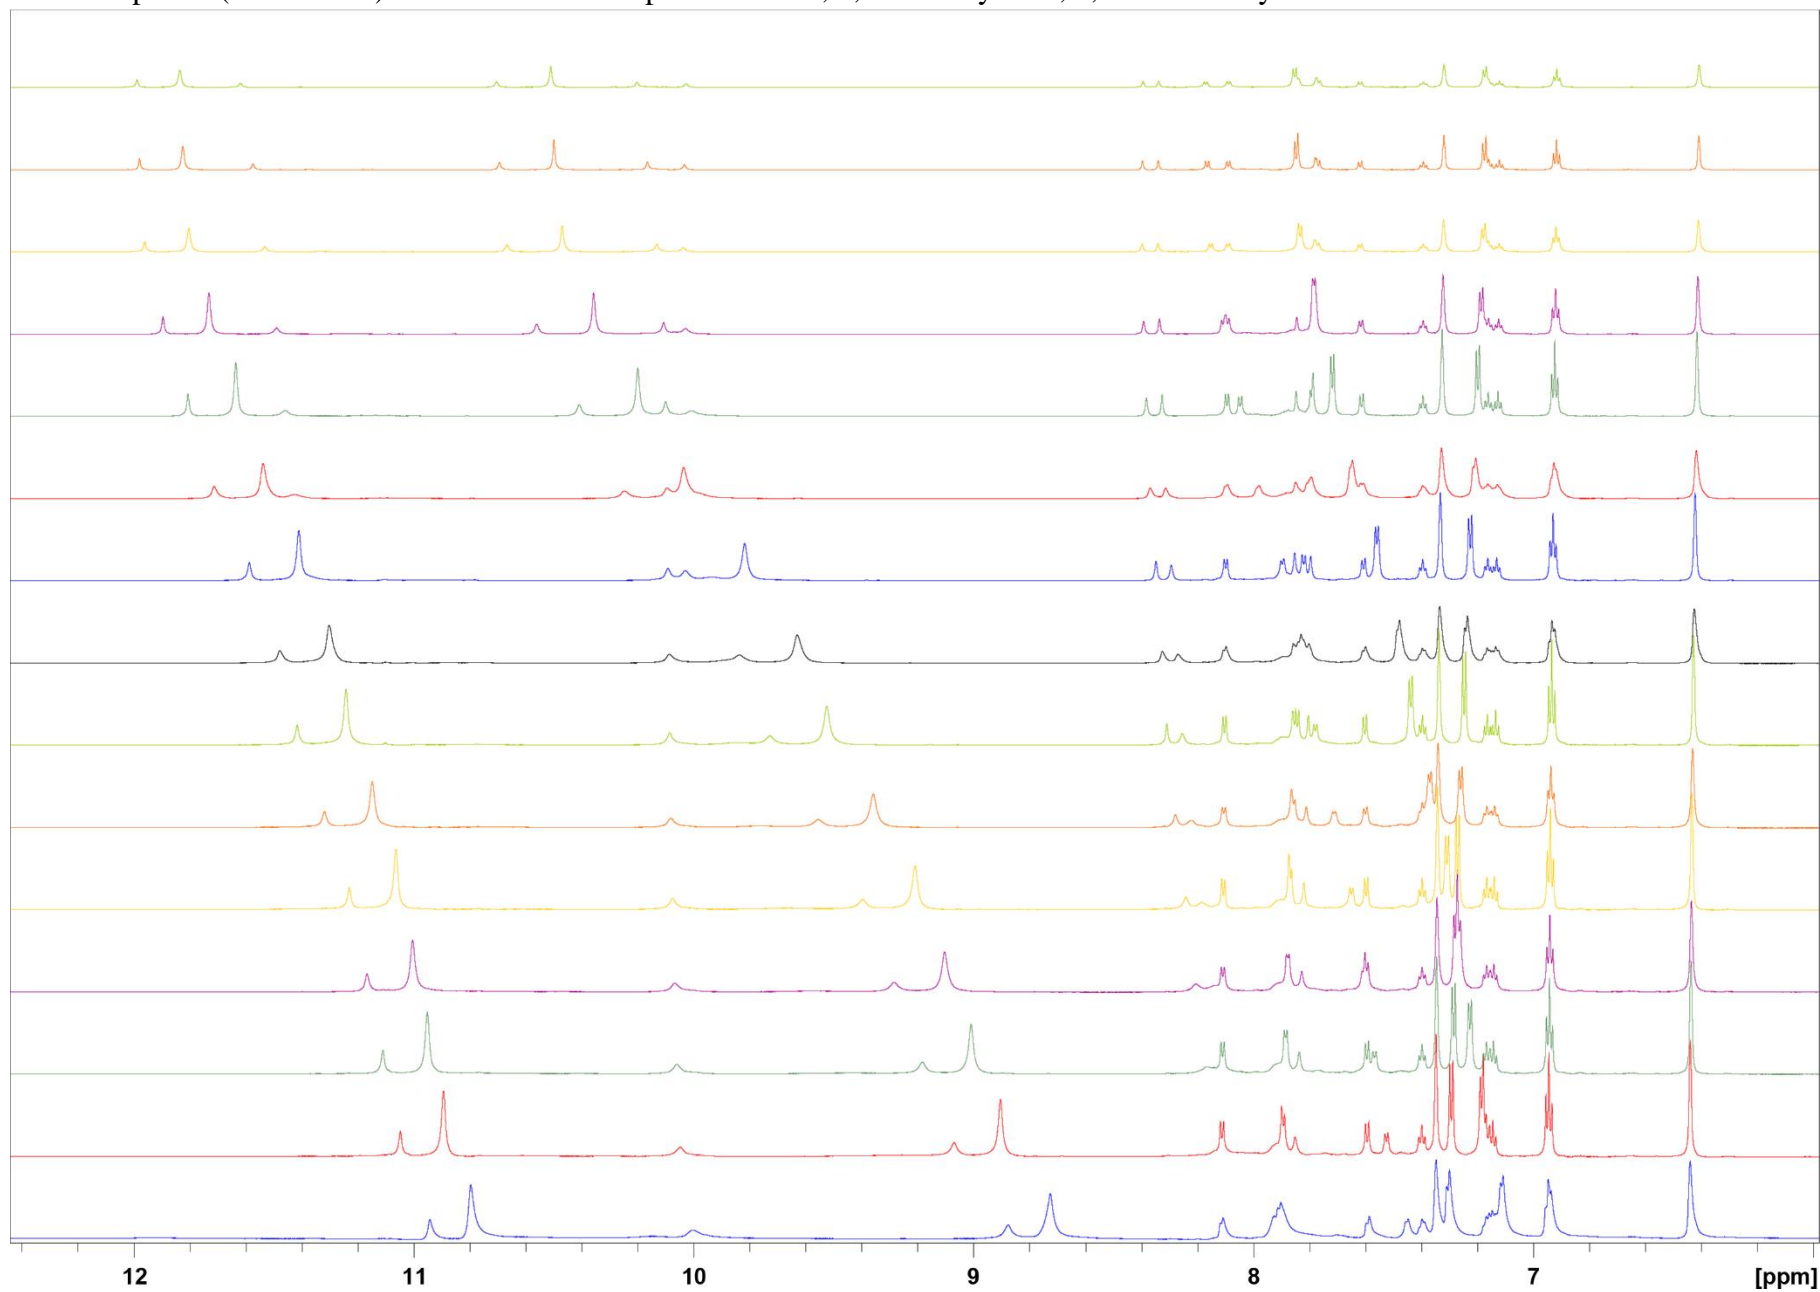

Stacked  $^1\text{H}$  NMR spectra (700.1 MHz) of a mixture of receptors **MC010**; 1,3-diindolylurea; 1,3-dicarbazolylurea + TBA-lactate

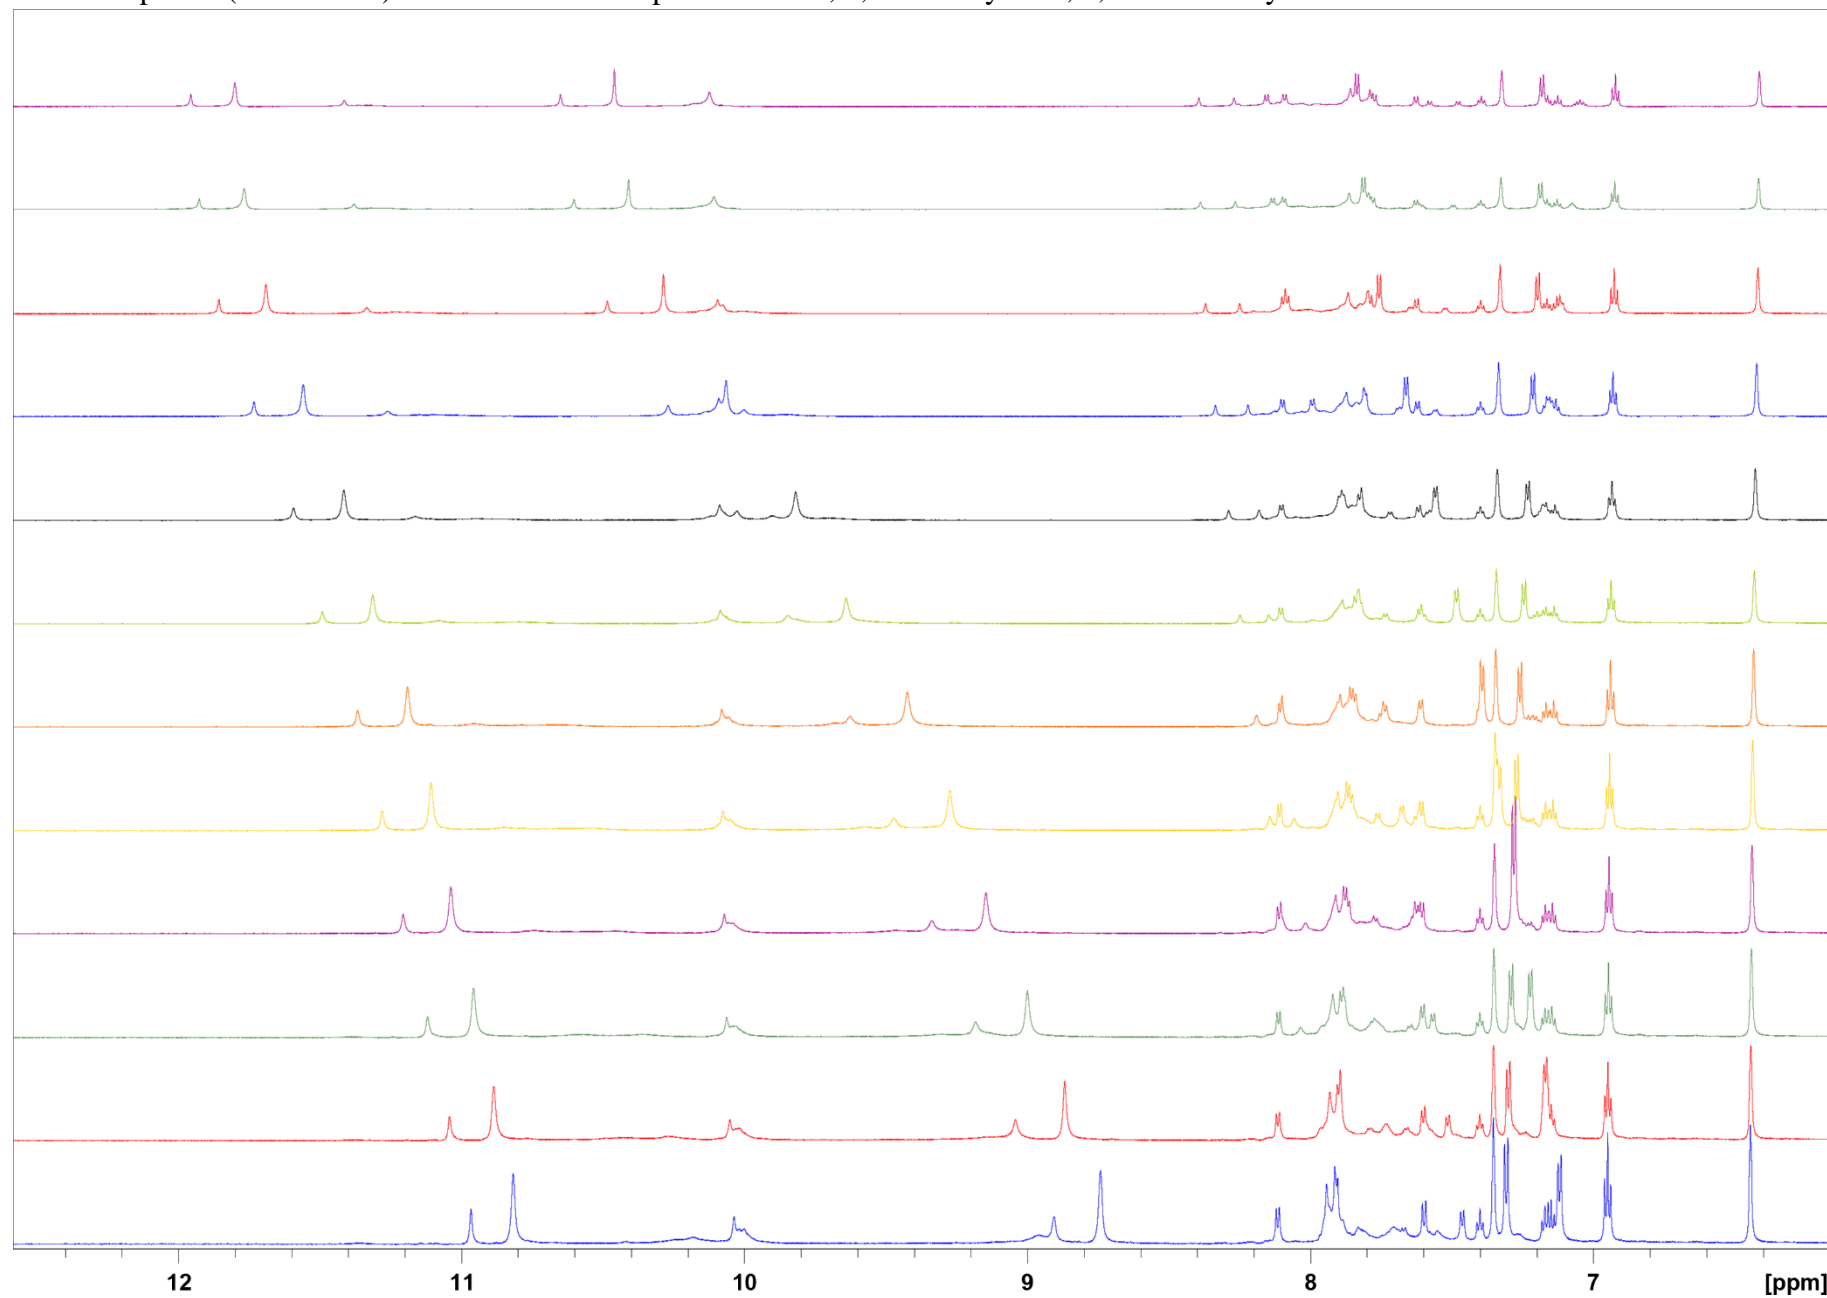

Stacked  $^1\text{H}$  NMR spectra (700.1 MHz) of a mixture of receptors **MC011**; 1,3-diindolylurea; 1,3-dicarbazolylurea + TBA-lactate

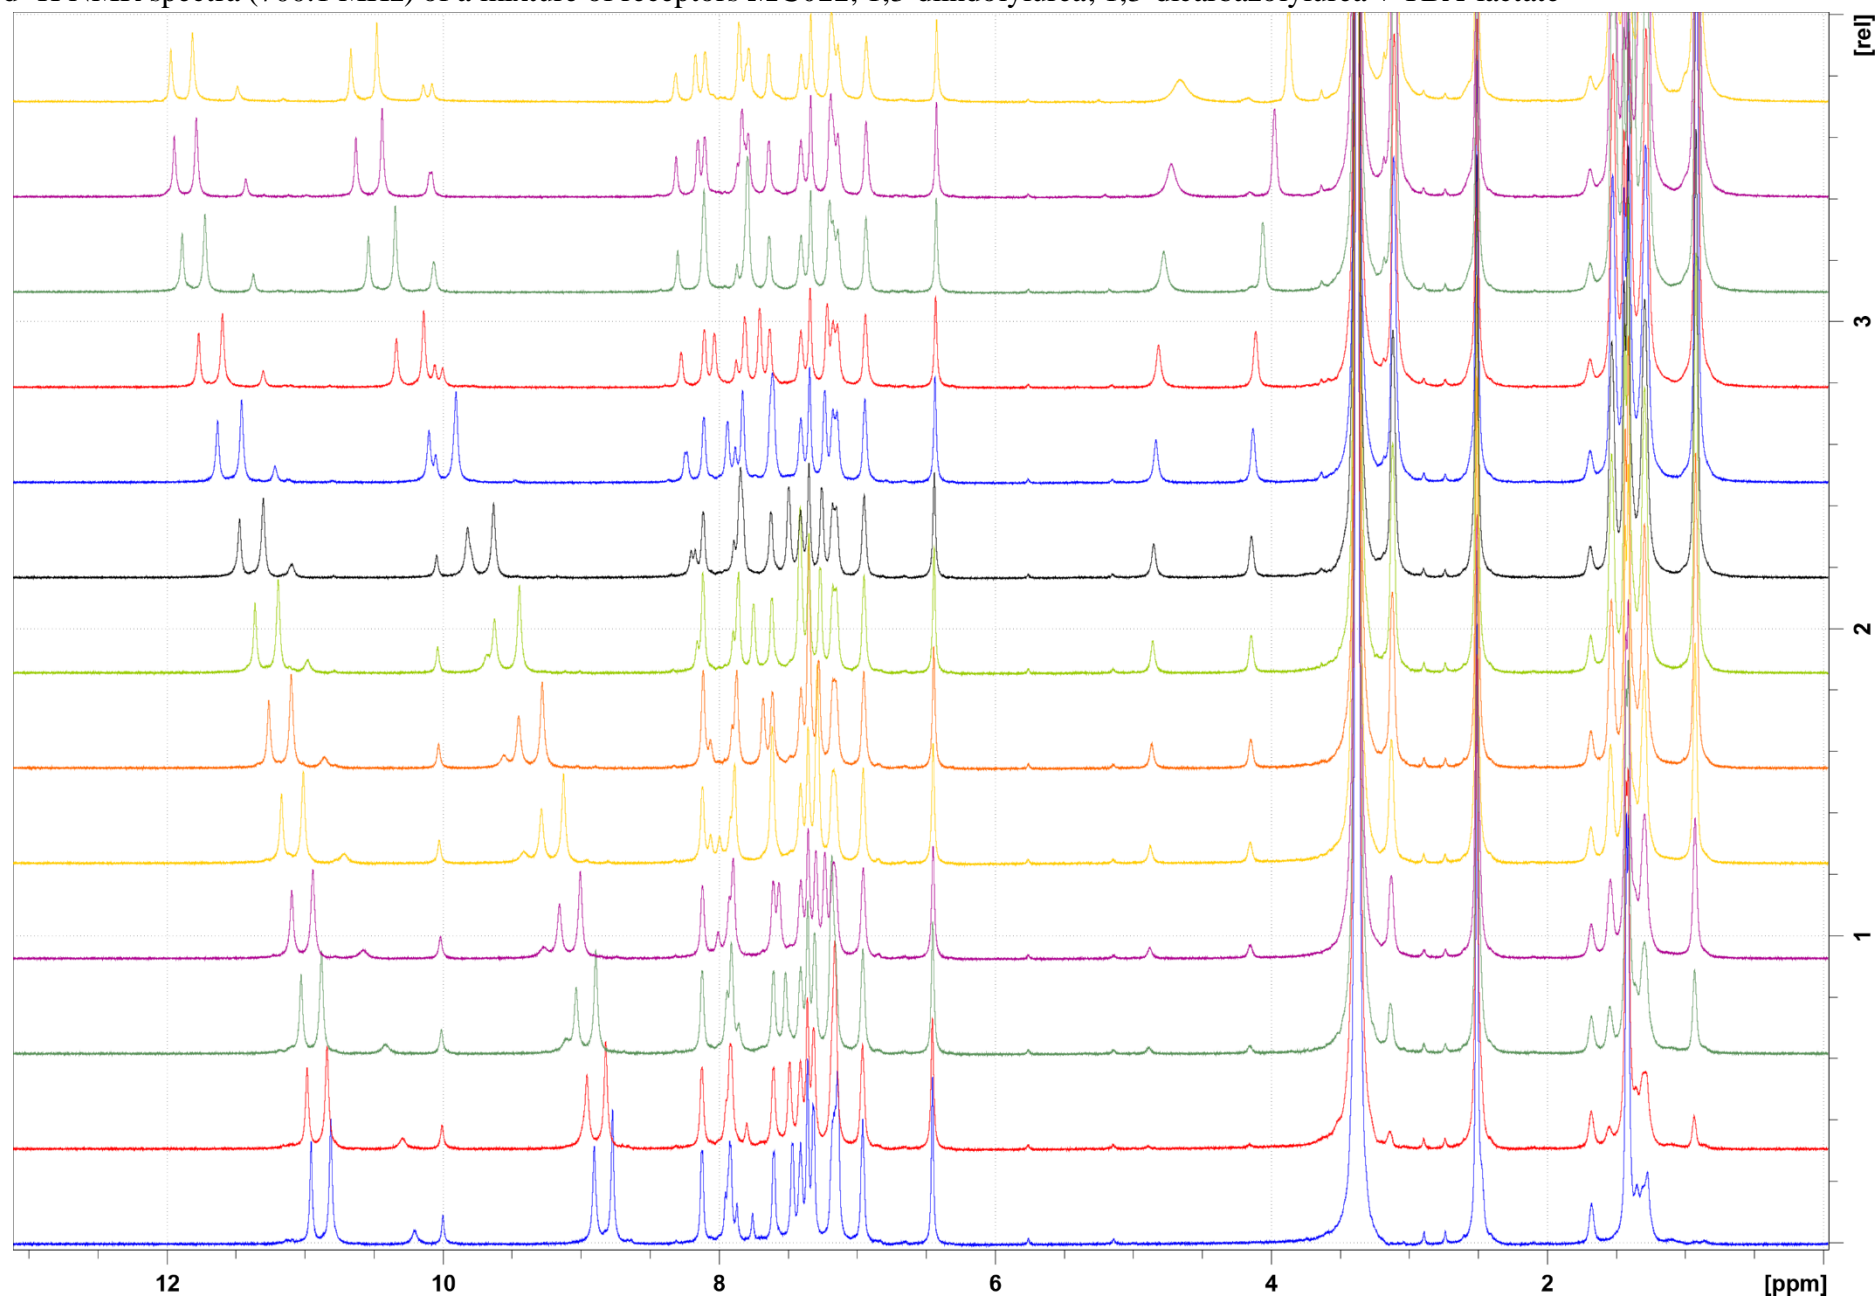

Stacked  $^1\text{H}$  NMR spectra (700.1 MHz) of a mixture of receptors **MC012**; 1,3-diindolylurea; 1,3-dicarbazolylurea + TBA-lactate

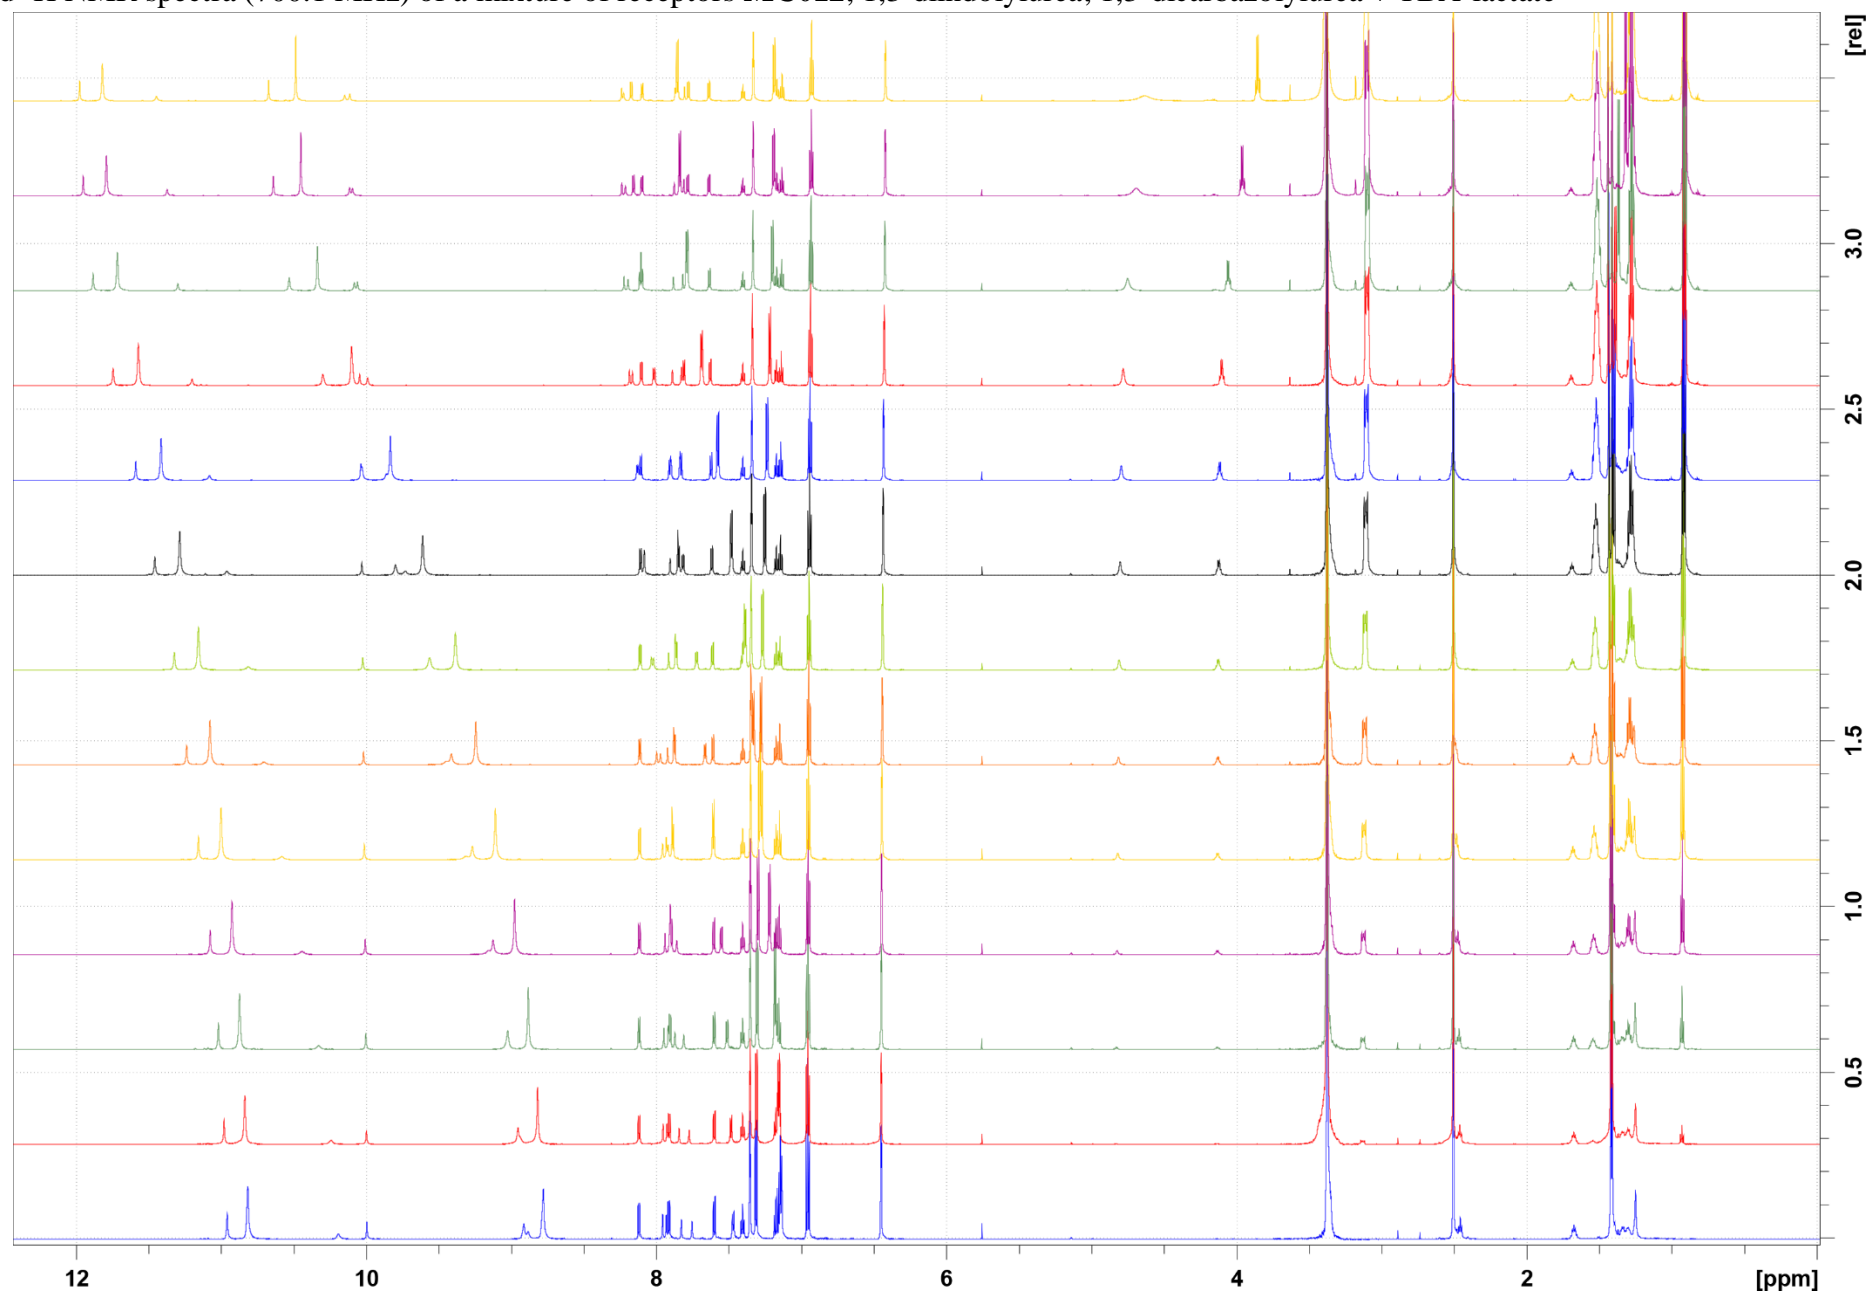

Stacked  $^1\text{H}$  NMR spectra (700.1 MHz) of a mixture of receptors **MC013**; 1,3-diindolylurea; 1,3-dicarbazolylurea + TBA-lactate

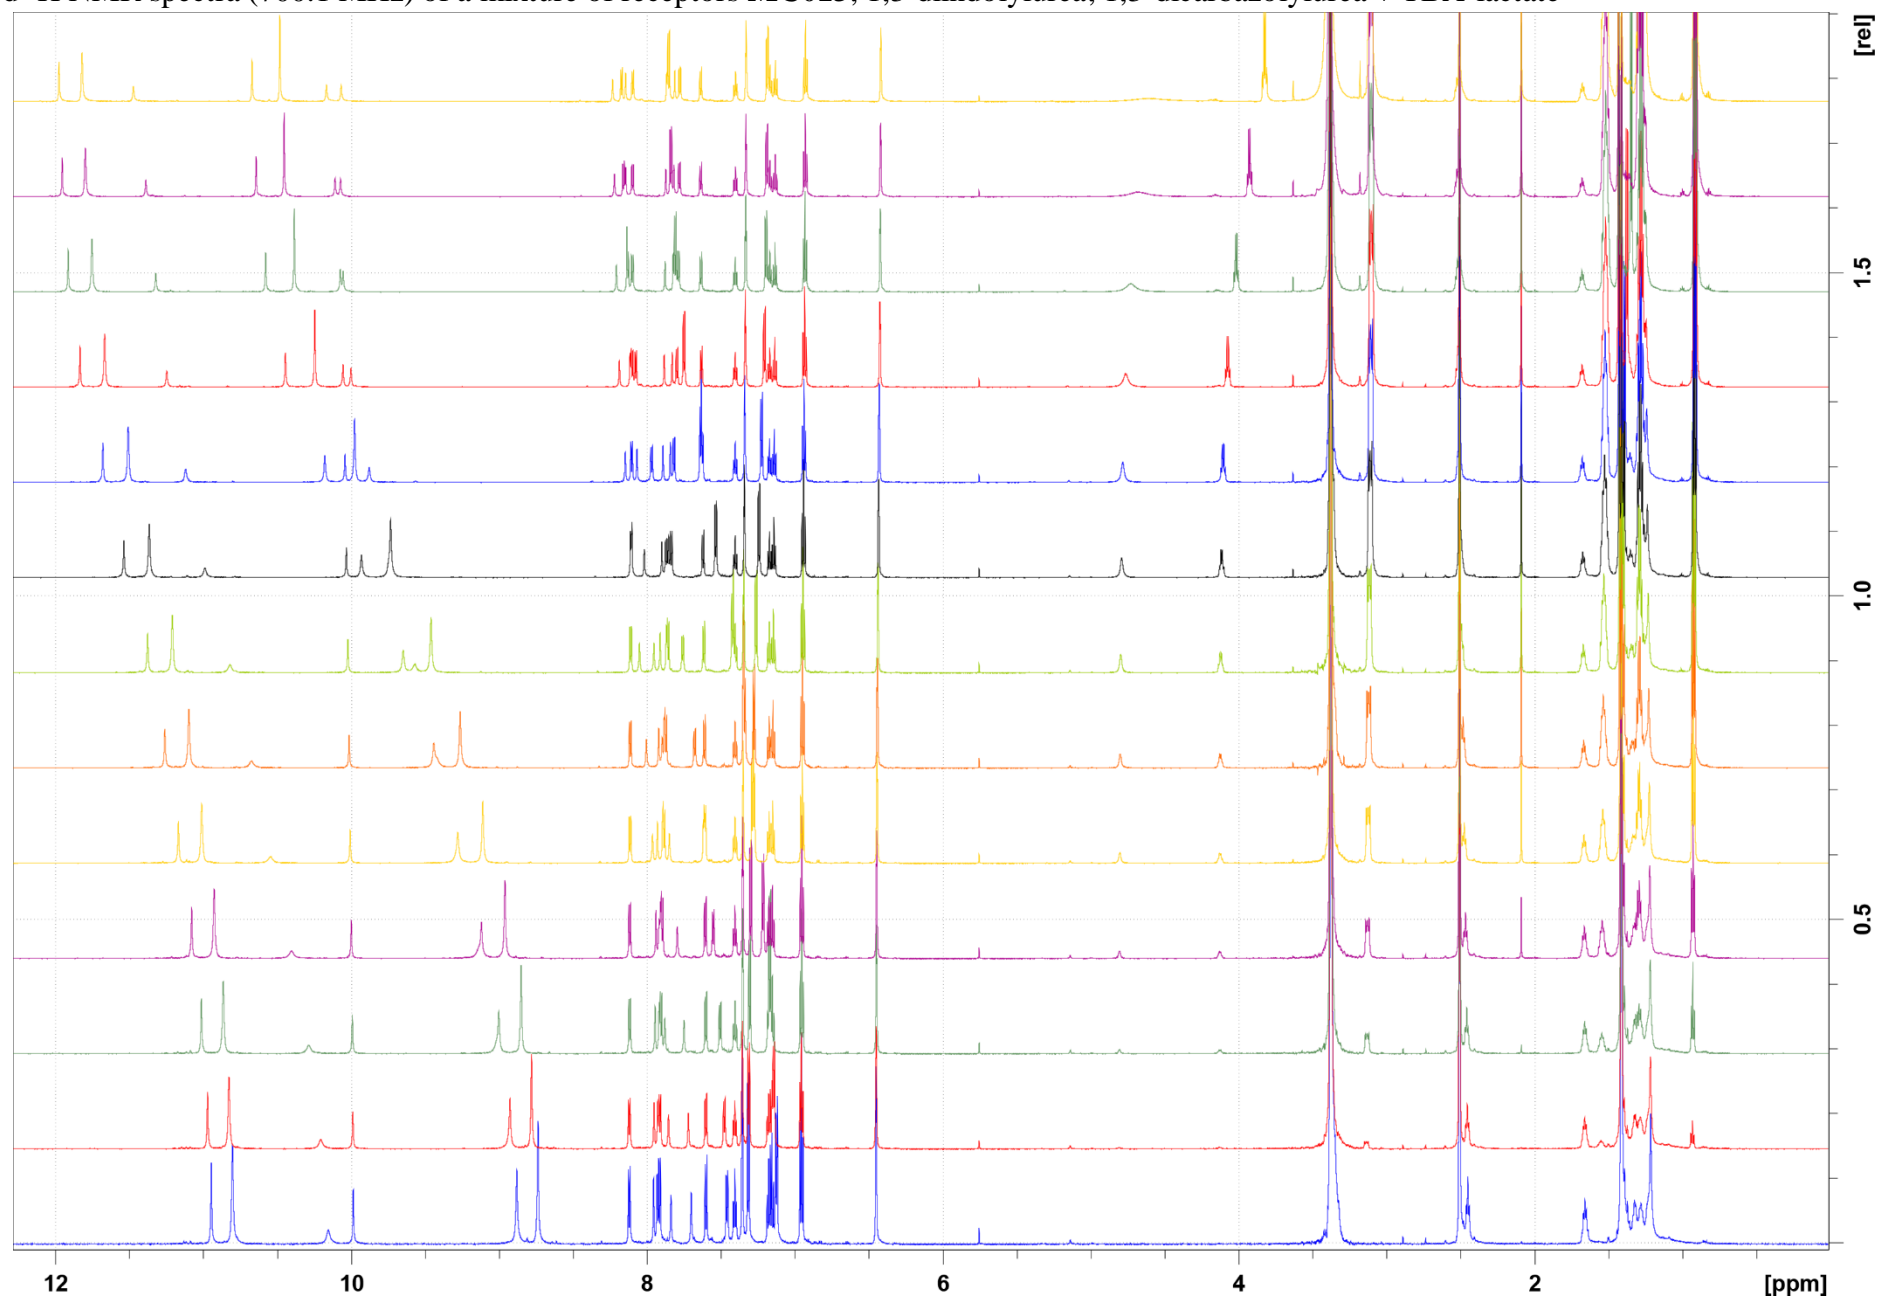



Stacked  $^1\text{H}$  NMR spectra (700.1 MHz) of a mixture of receptors **MC014**; 1,3-diindolylurea; 1,3-dicarbazolylurea + TBA-lactate

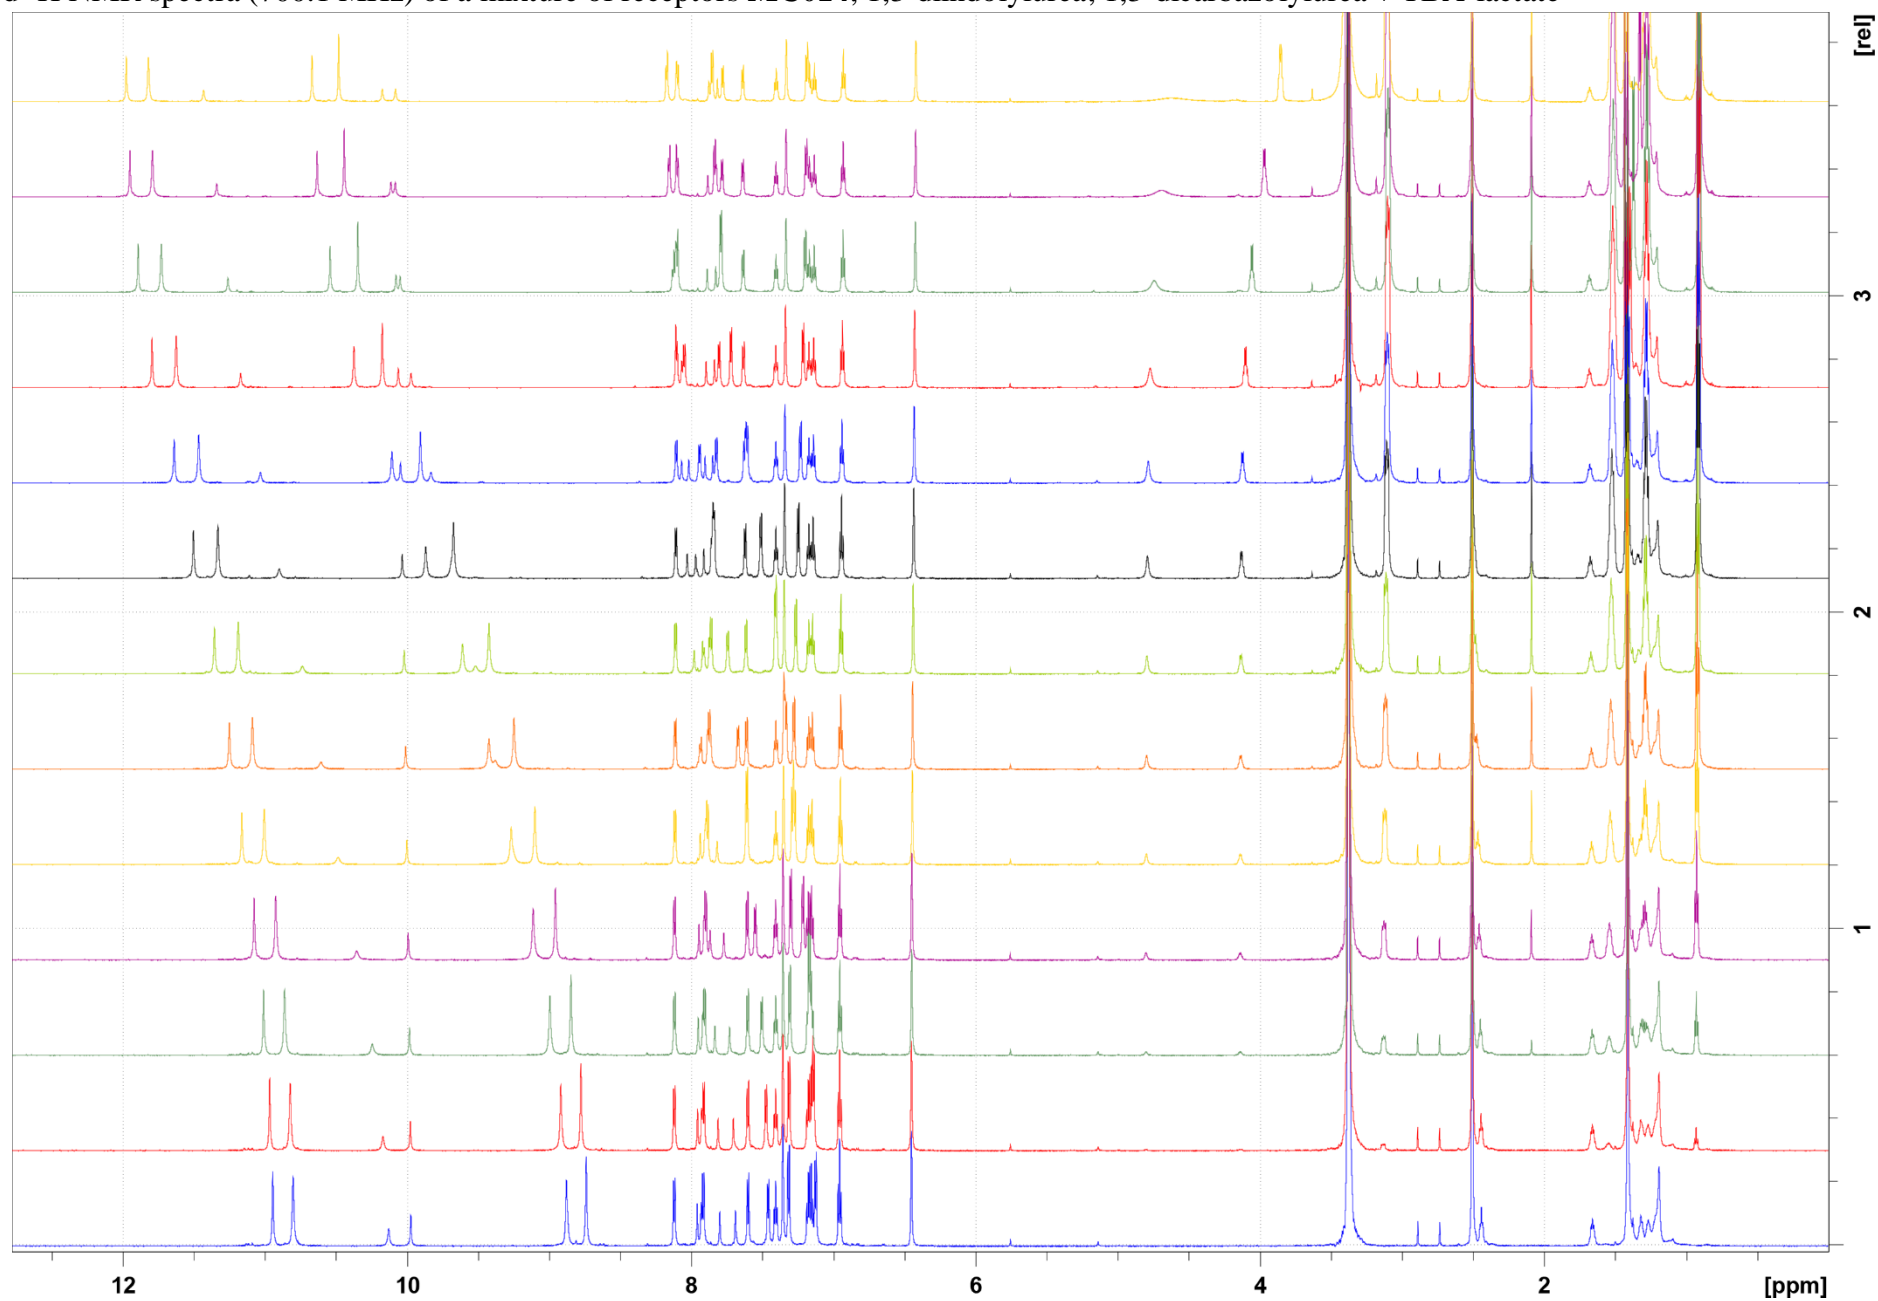

Stacked  $^1\text{H}$  NMR spectra (700.1 MHz) of a mixture of receptors **CZ016**; 1,3-diindolylurea; 1,3-dicarbazolylurea + TBA-pivalate

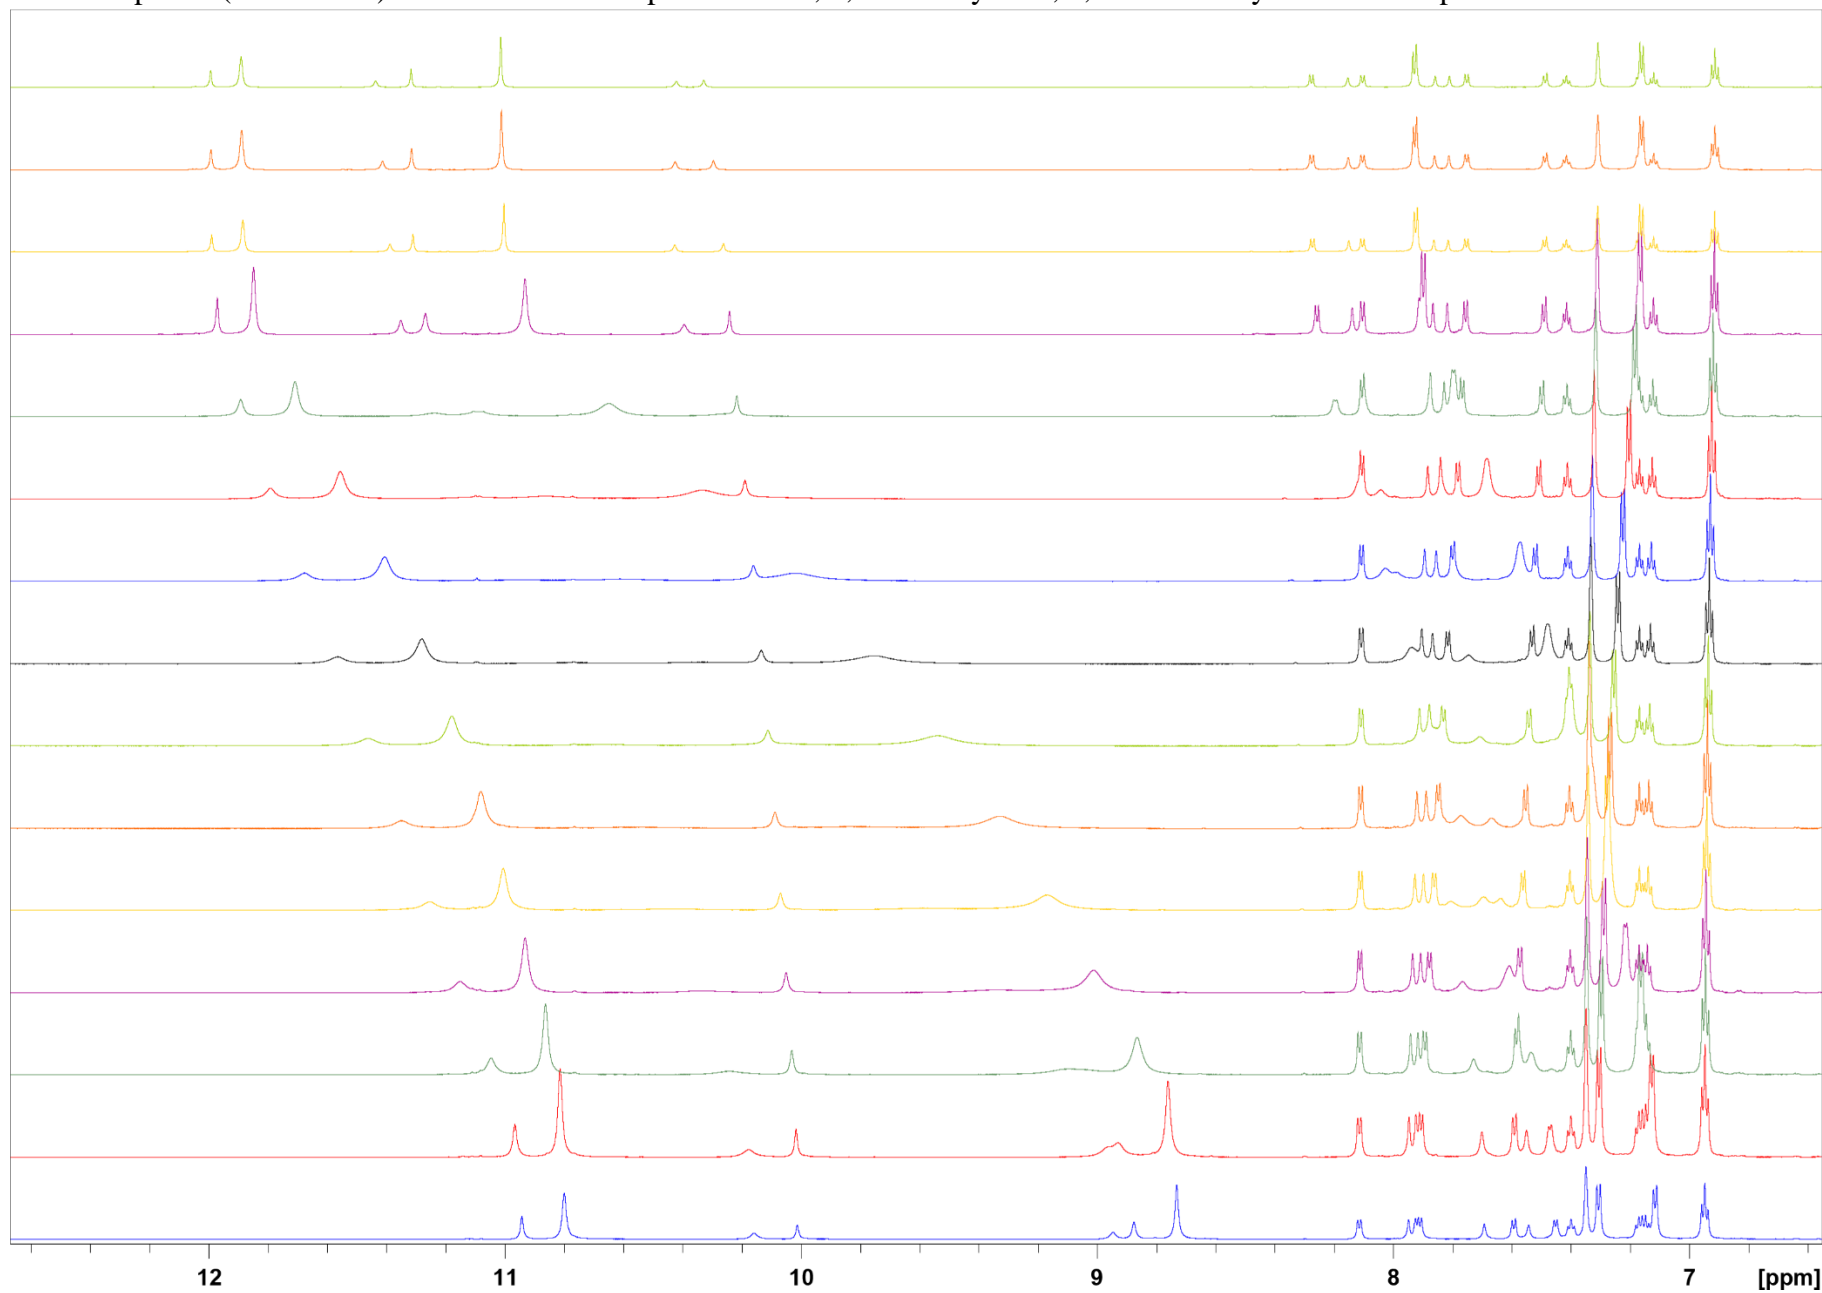

Stacked  $^1\text{H}$  NMR spectra (700.1 MHz) of a mixture of receptors **MC001**; 2,7-(COOBu) $_2$ -indolocarbazole; 2,9-(COOBu) $_2$ -indolocarbazole + TBA-pivalate

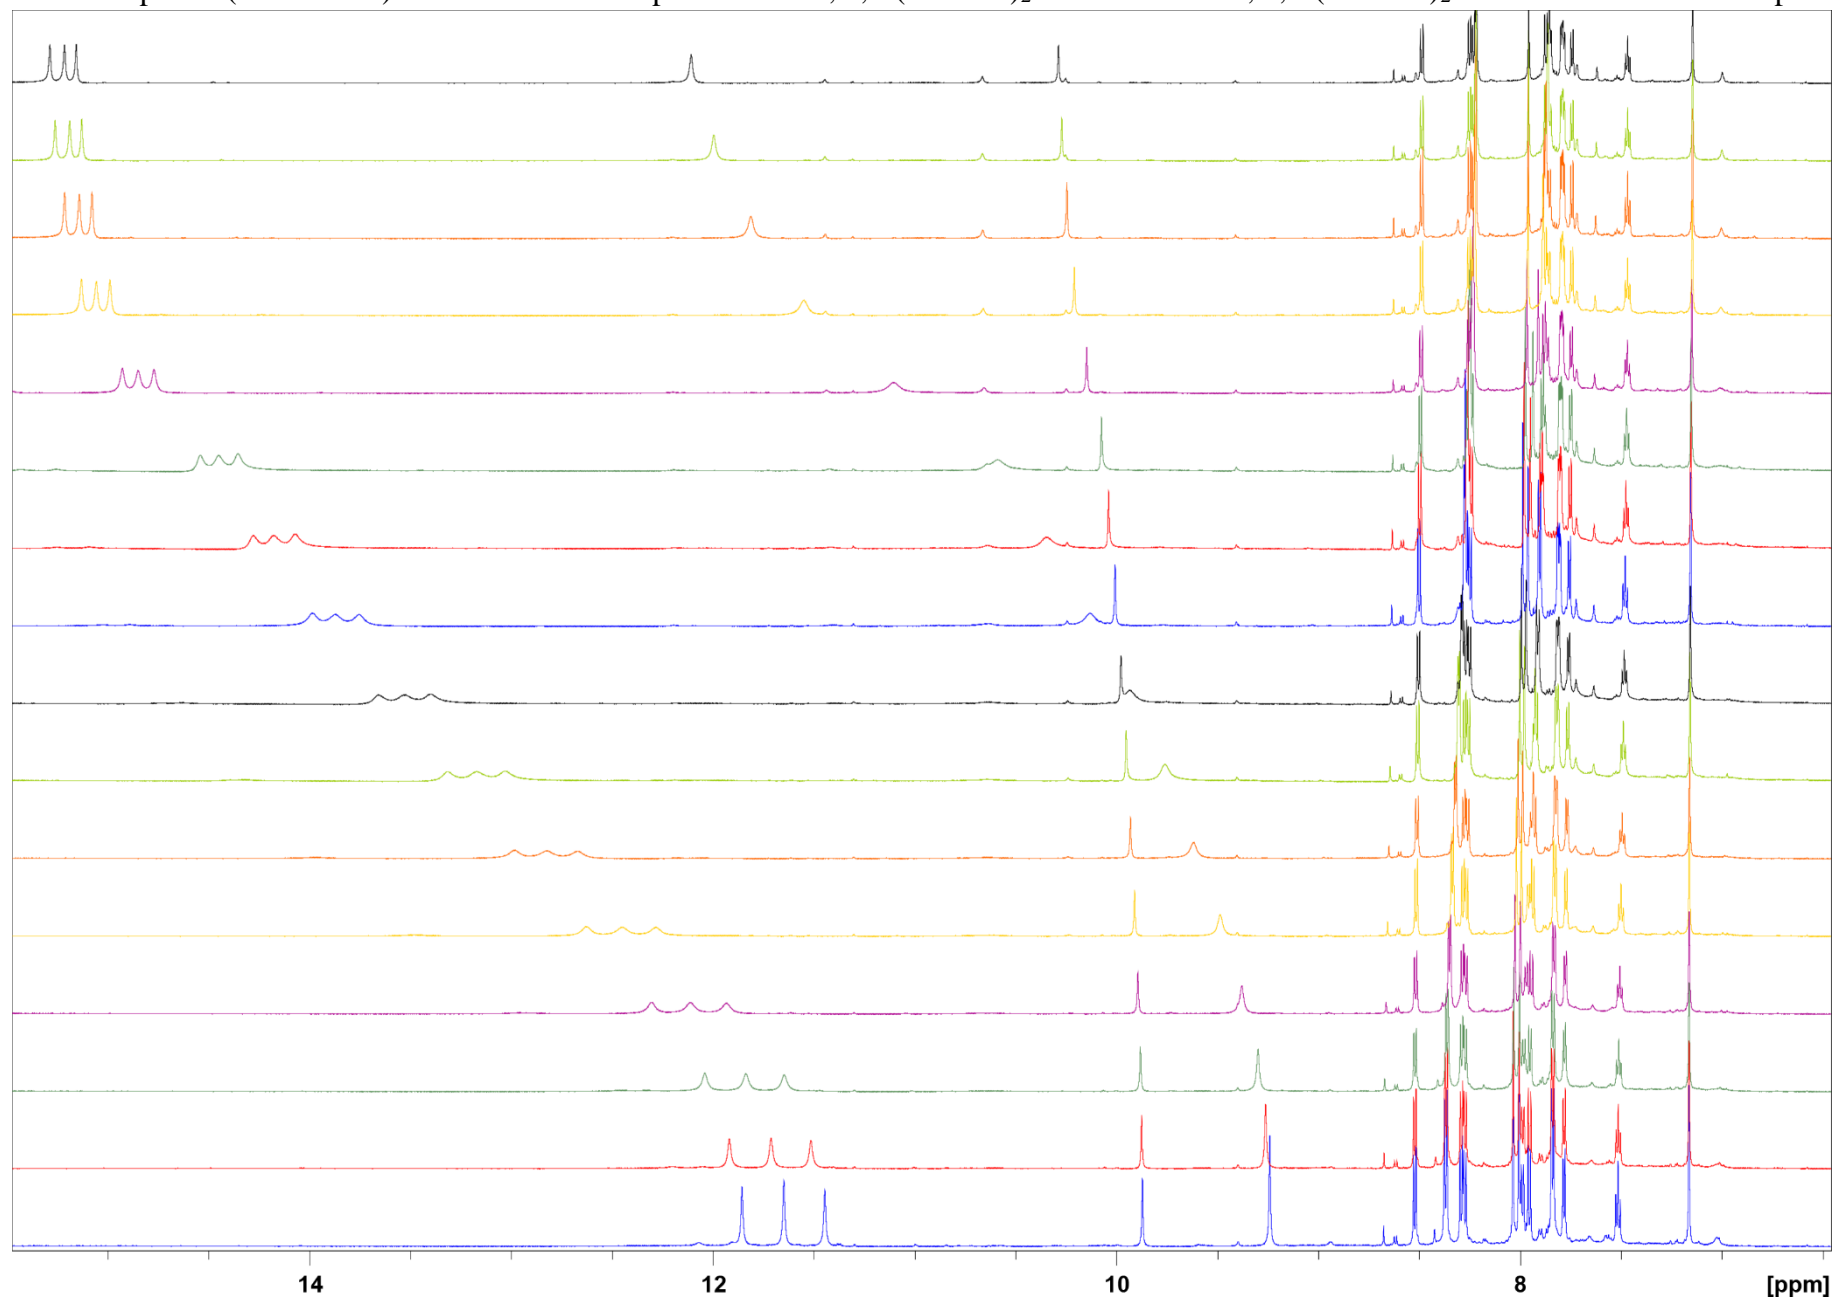

Stacked  $^1\text{H}$  NMR spectra (700.1 MHz) of a mixture of receptors **MC003**; 1,3-diindolylurea; 1,3-dicarbazolylurea + TBA-pivalate

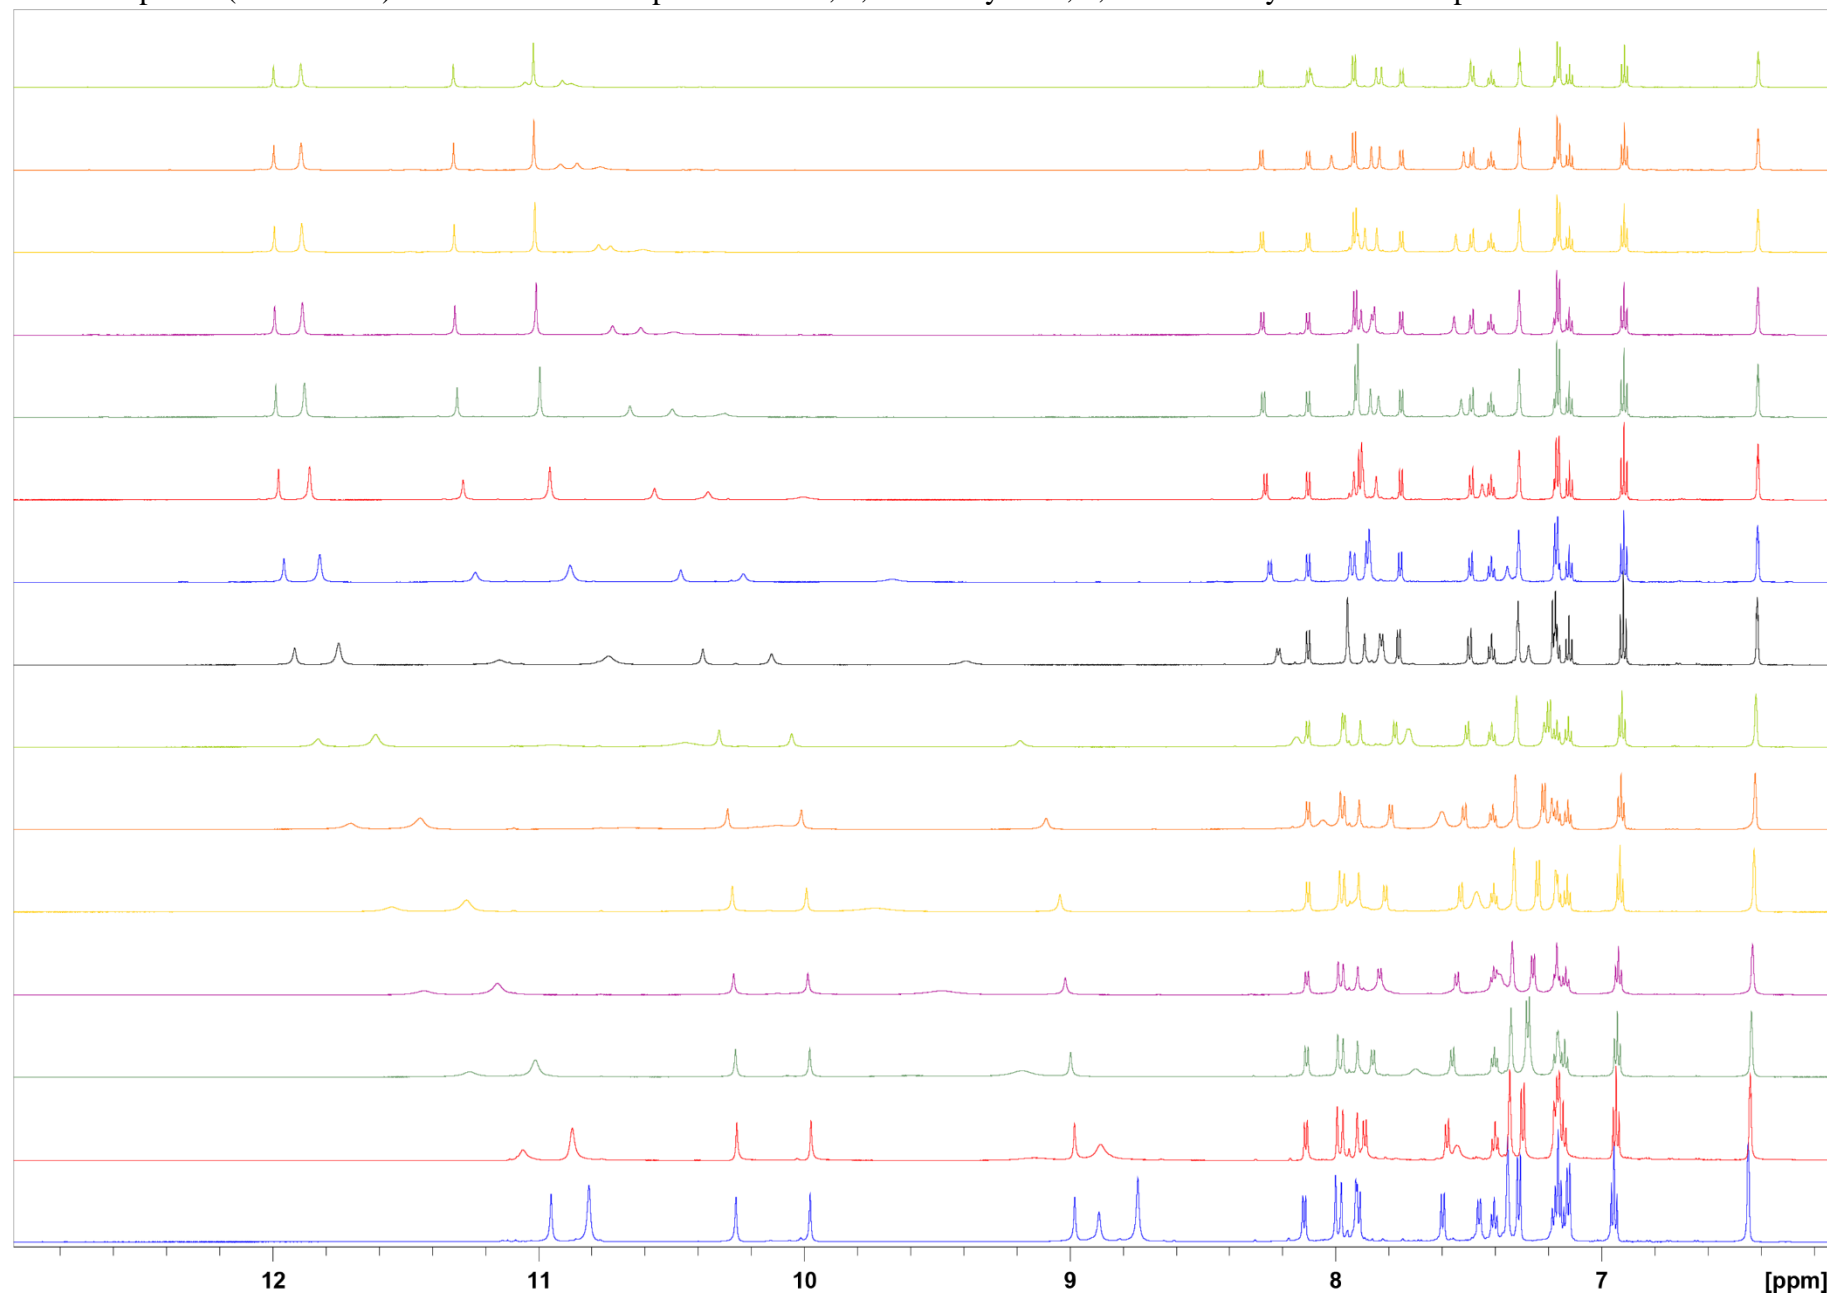

Stacked  $^1\text{H}$  NMR spectra (700.1 MHz) of a mixture of receptors **MC004**; 3,4,4- $\text{Cl}_3$ -diphenylurea; 2,7-(COOBu) $_2$ -indolocarbazole; 2,9-(COOBu) $_2$ -indolocarbazole + TBA-pivalate

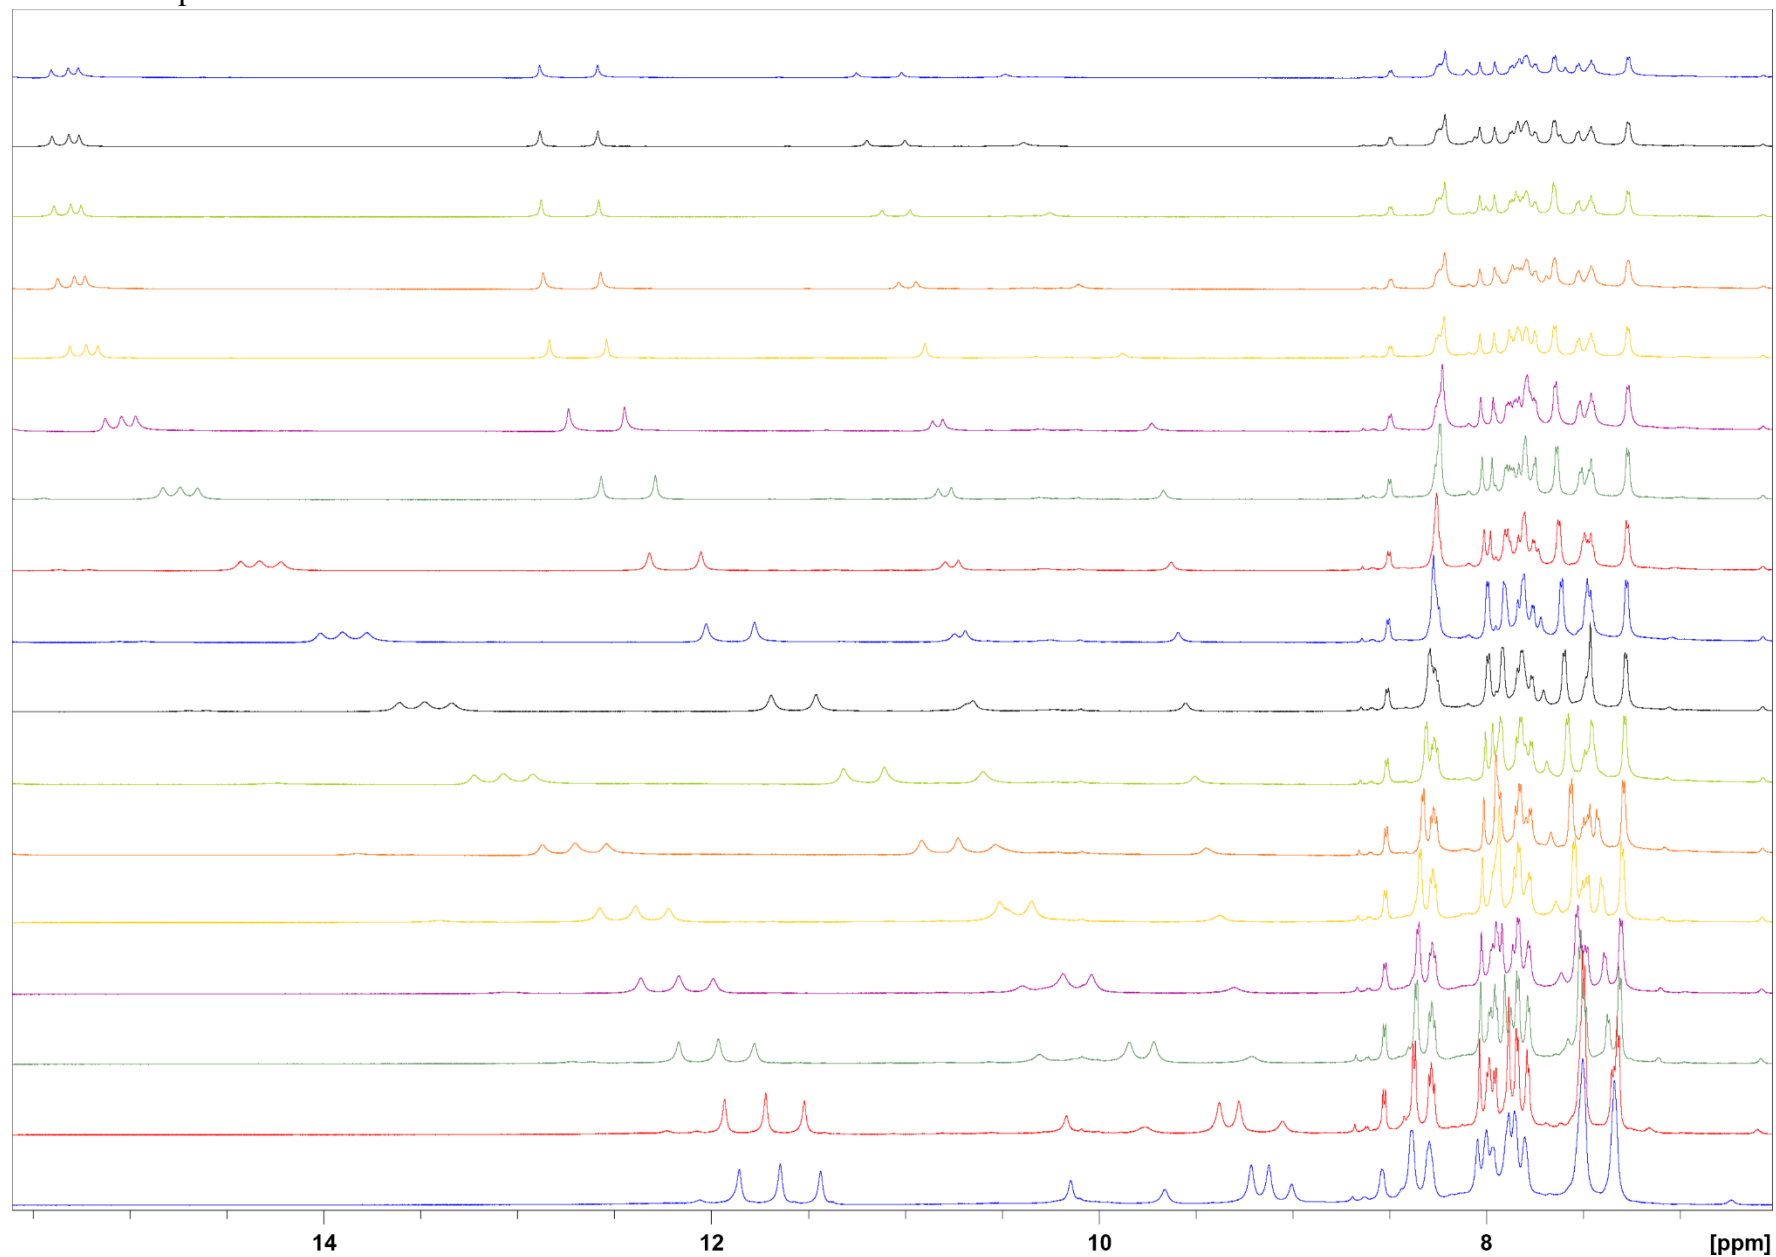

Stacked  $^1\text{H}$  NMR spectra (700.1 MHz) of a mixture of receptors **MC005**; 1,3-diindolylurea; 1,3-dicarbazolyurea + TBA-pivalate

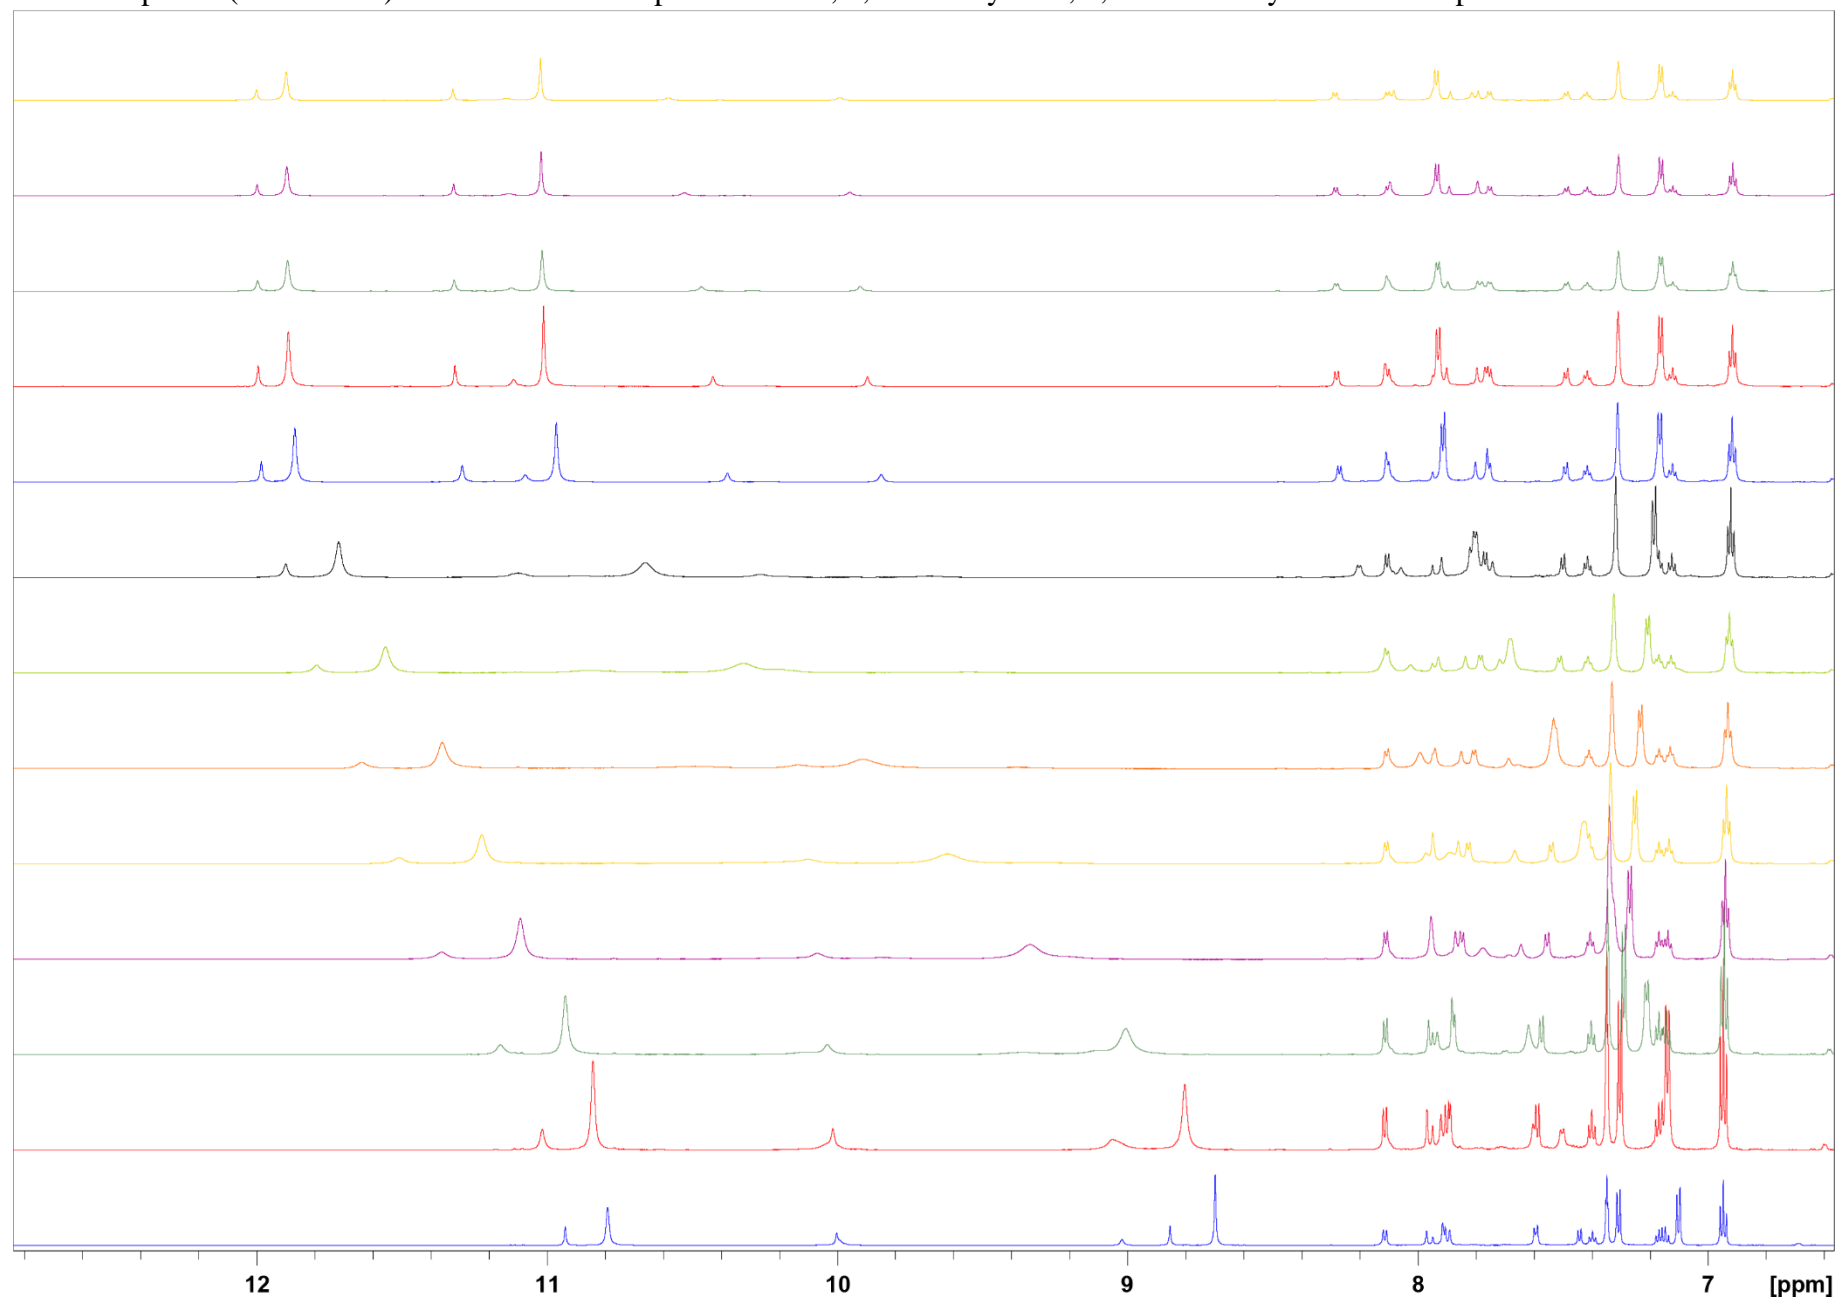

Stacked  $^1\text{H}$  NMR spectra (700.1 MHz) of a mixture of receptors **MC006**; 2,7-(COOBu) $_2$ -indolocarbazole; 2,9-(COOBu) $_2$ -indolocarbazole + TBA-pivalate

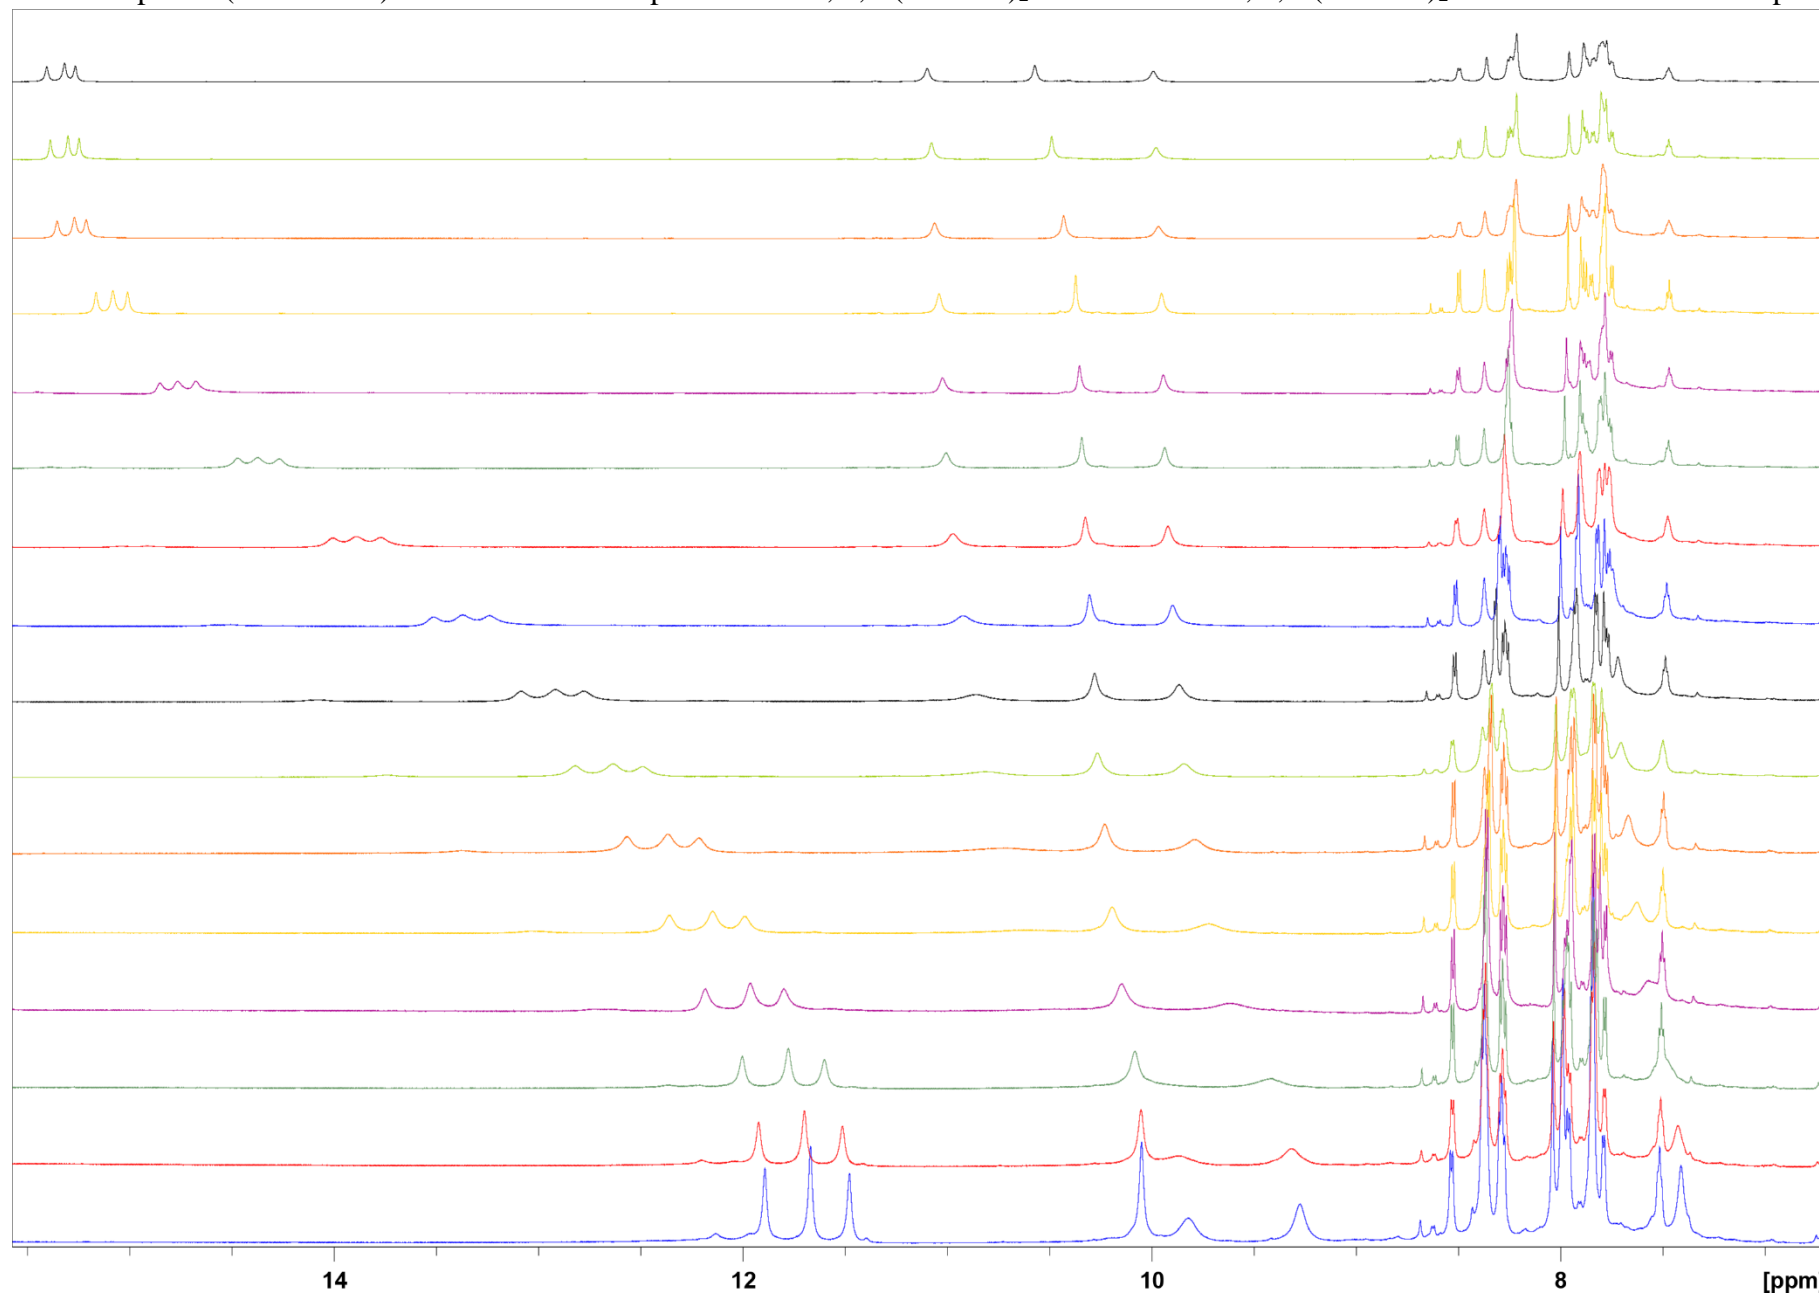

Stacked  $^1\text{H}$  NMR spectra (700.1 MHz) of a mixture of receptors **MC007**; 1,3-diindolylurea; 1,3-dicarbazolylurea + TBA-pivalate

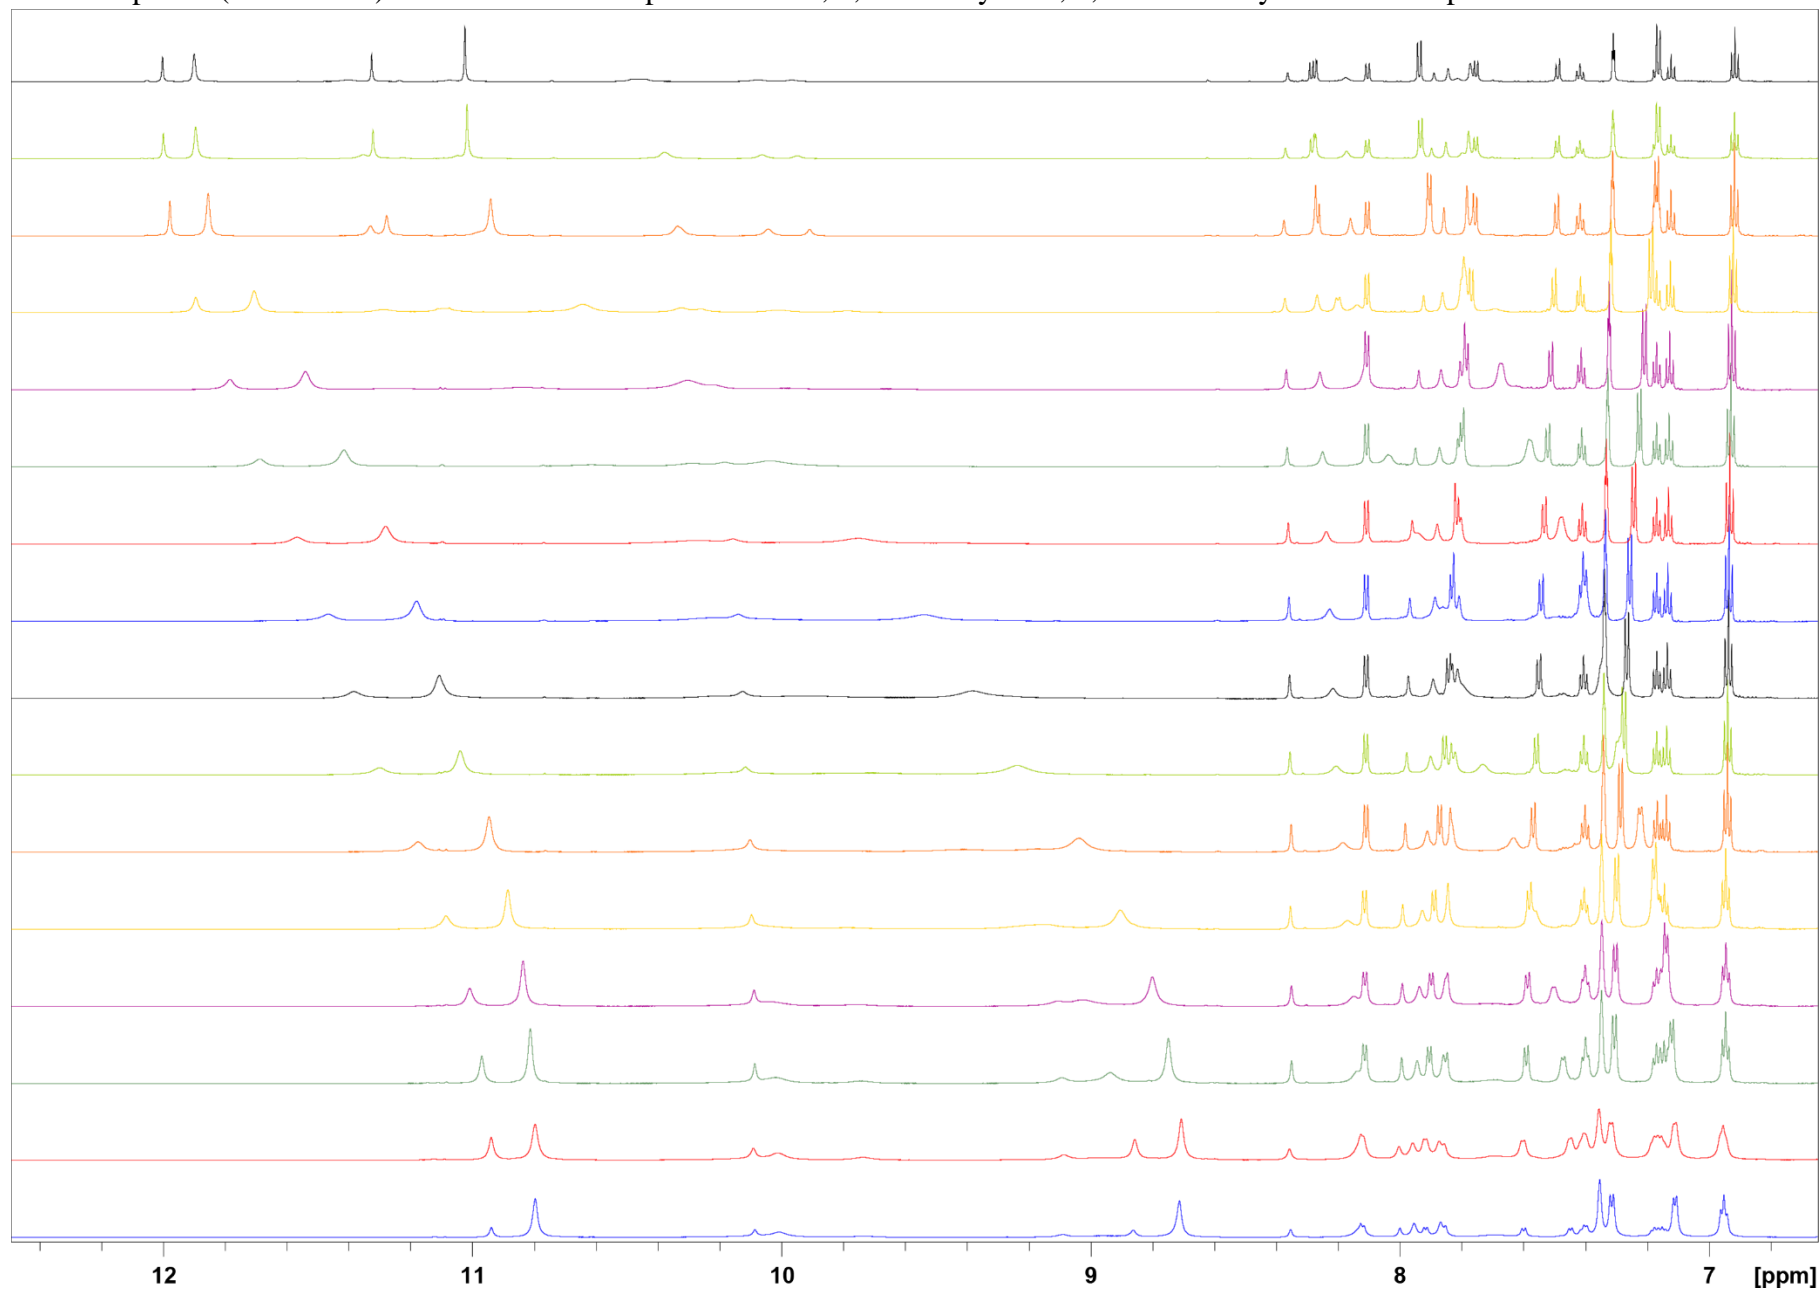



Stacked  $^1\text{H}$  NMR spectra (700.1 MHz) of a mixture of receptors **MC008**; 1,3-diindolylurea; 1,3-dicarbazolylurea + TBA-pivalate

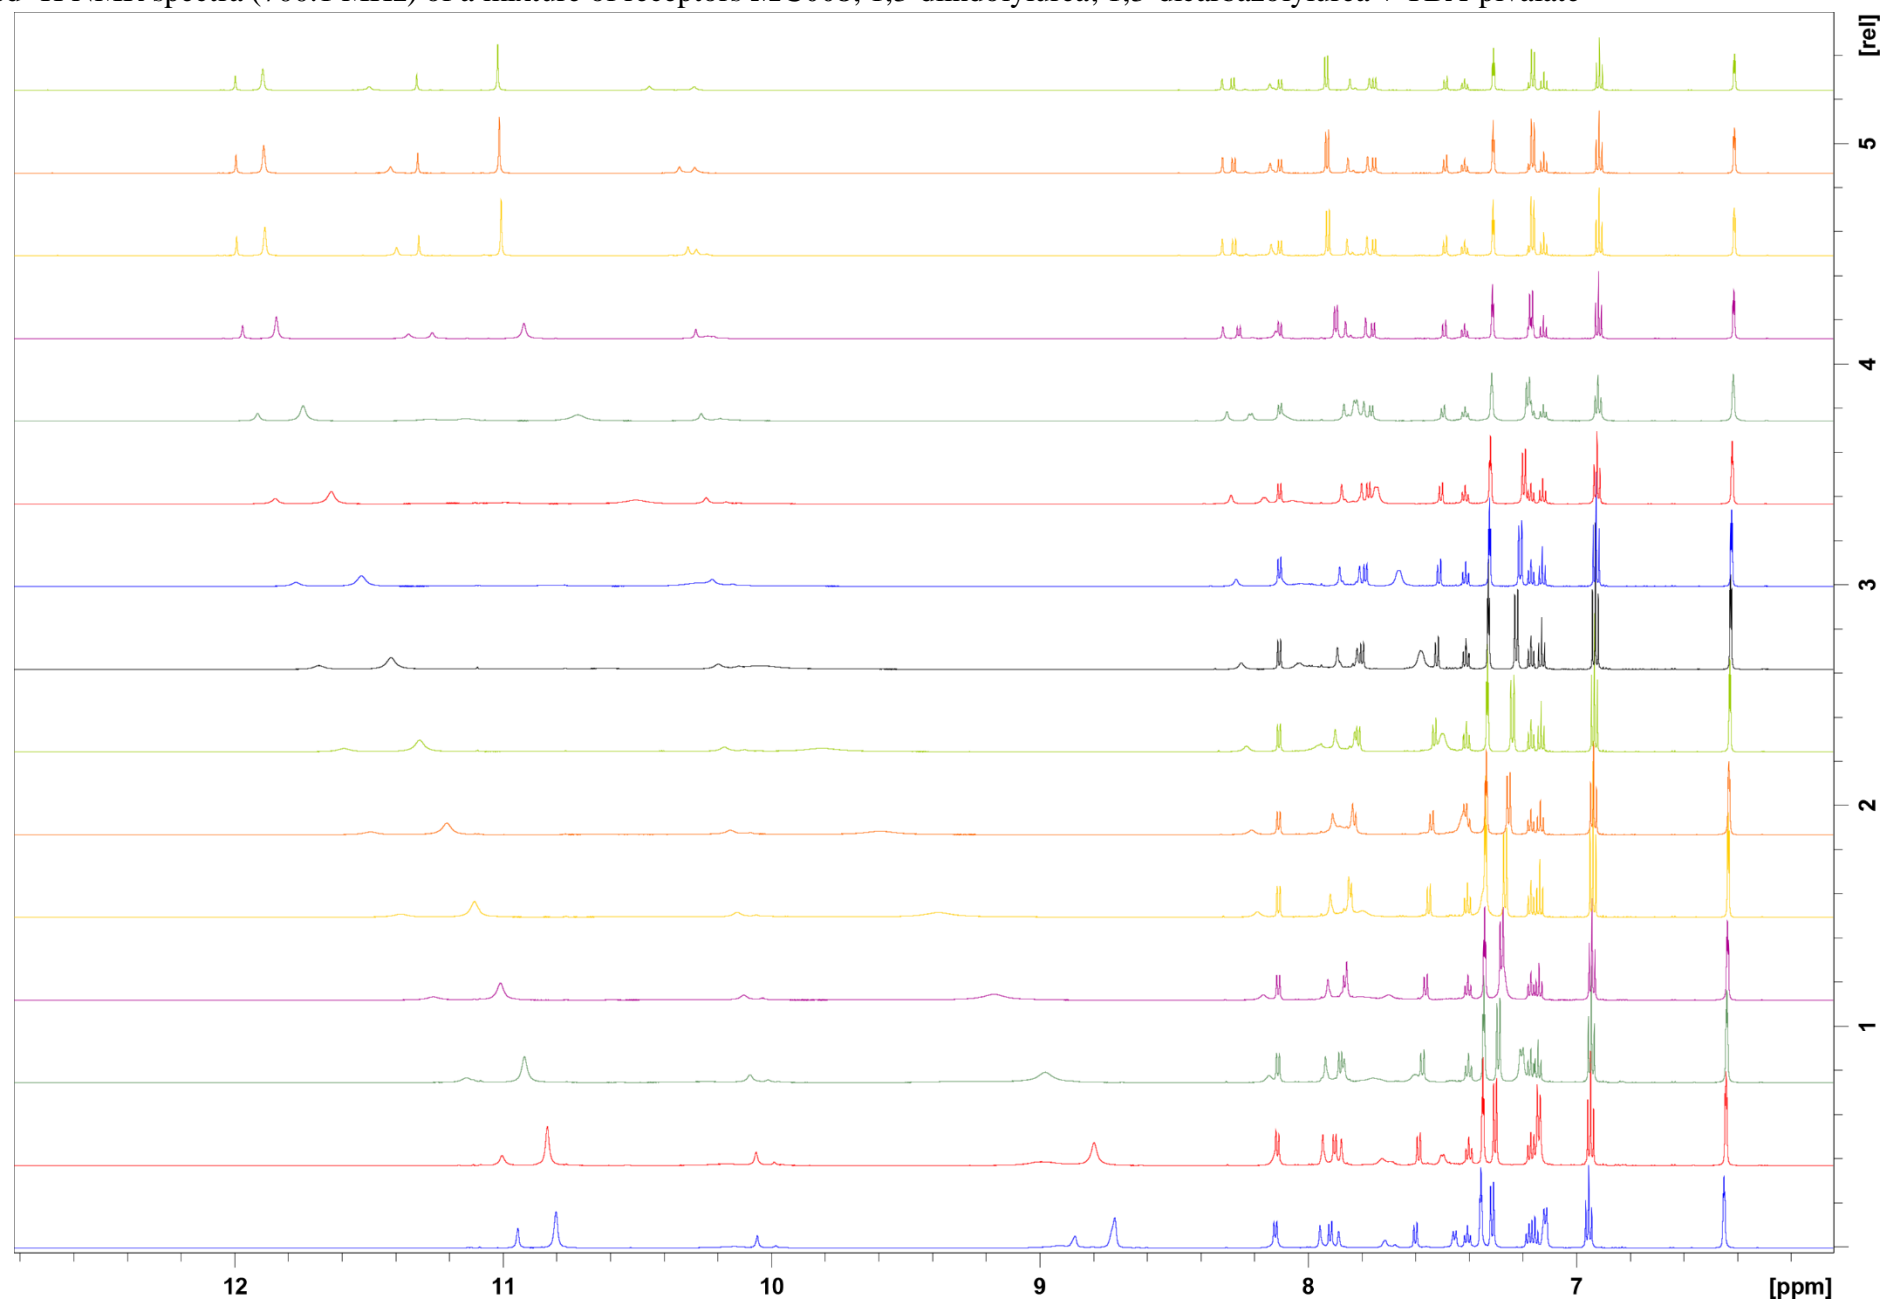

Stacked  $^1\text{H}$  NMR spectra (700.1 MHz) of a mixture of receptors **MC009**; 1,3-diindolylurea; 1,3-dicarbazolylurea + TBA-pivalate

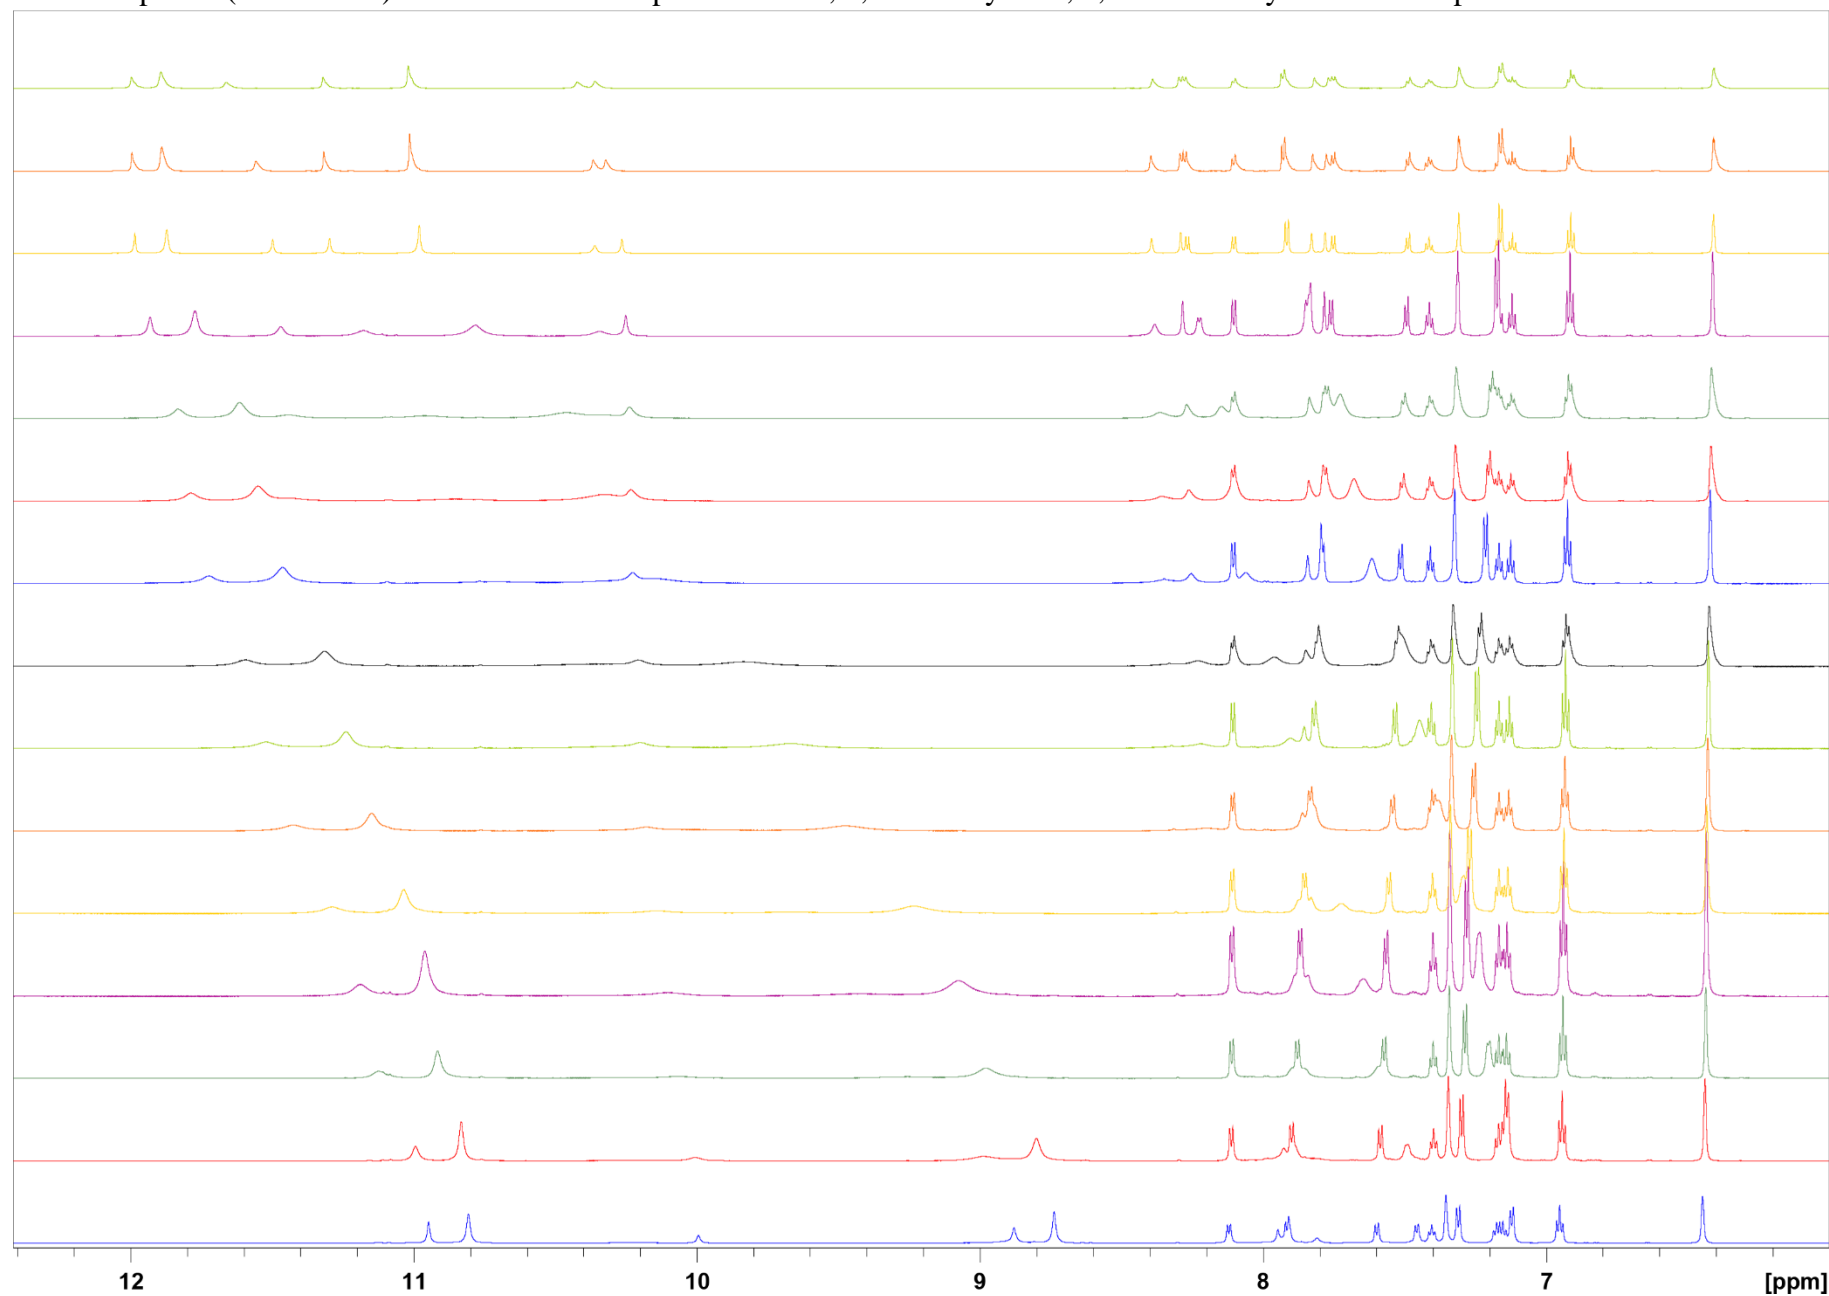

Stacked  $^1\text{H}$  NMR spectra (700.1 MHz) of a mixture of receptors **MC010**; 1,3-diindolylurea; 1,3-dicarbazolylurea + TBA-pivalate

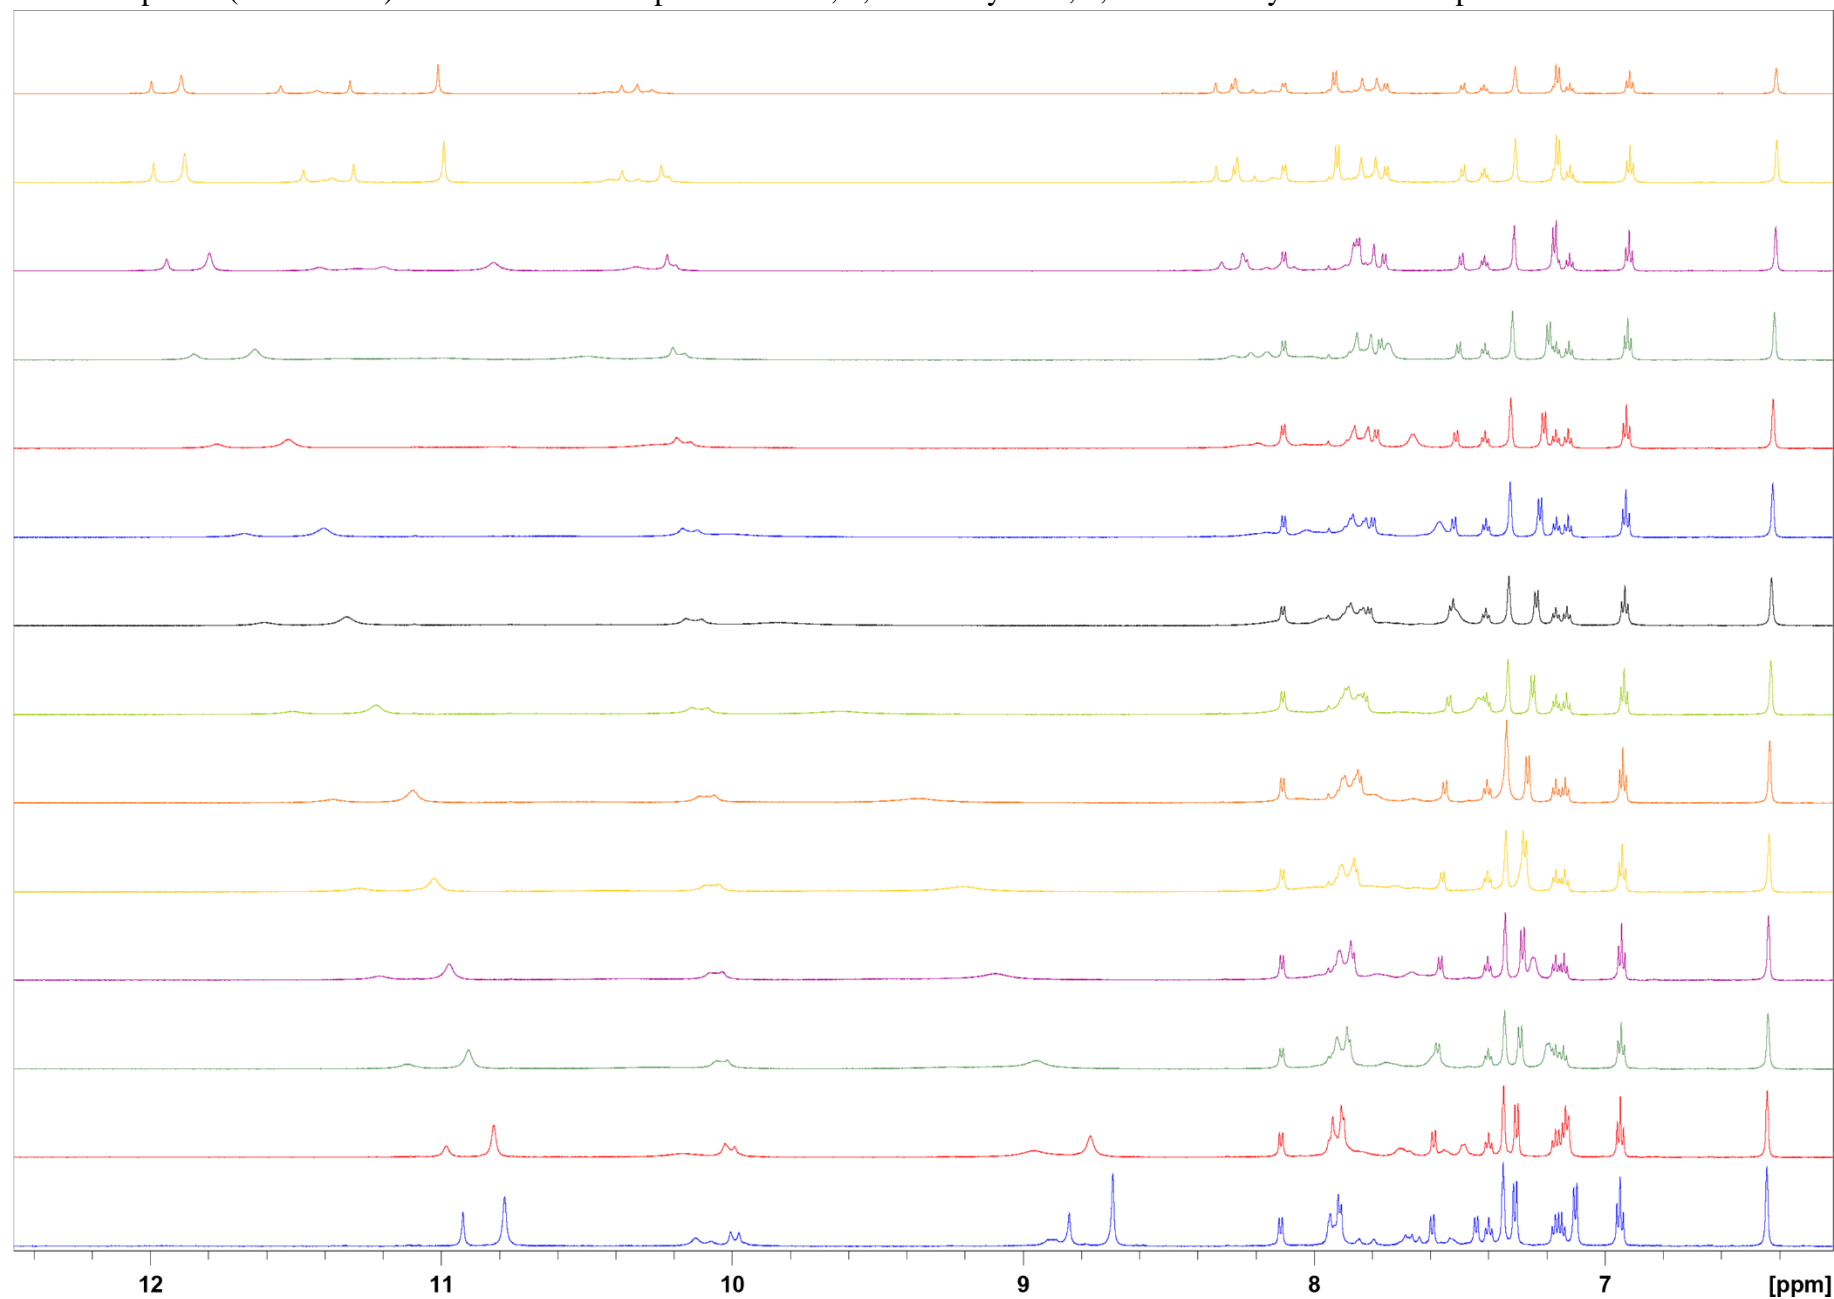

Stacked  $^1\text{H}$  NMR spectra (700.1 MHz) of a mixture of receptors **MC011**; 1,3-diindolylurea; 1,3-dicarbazolylurea + TBA-pivalate

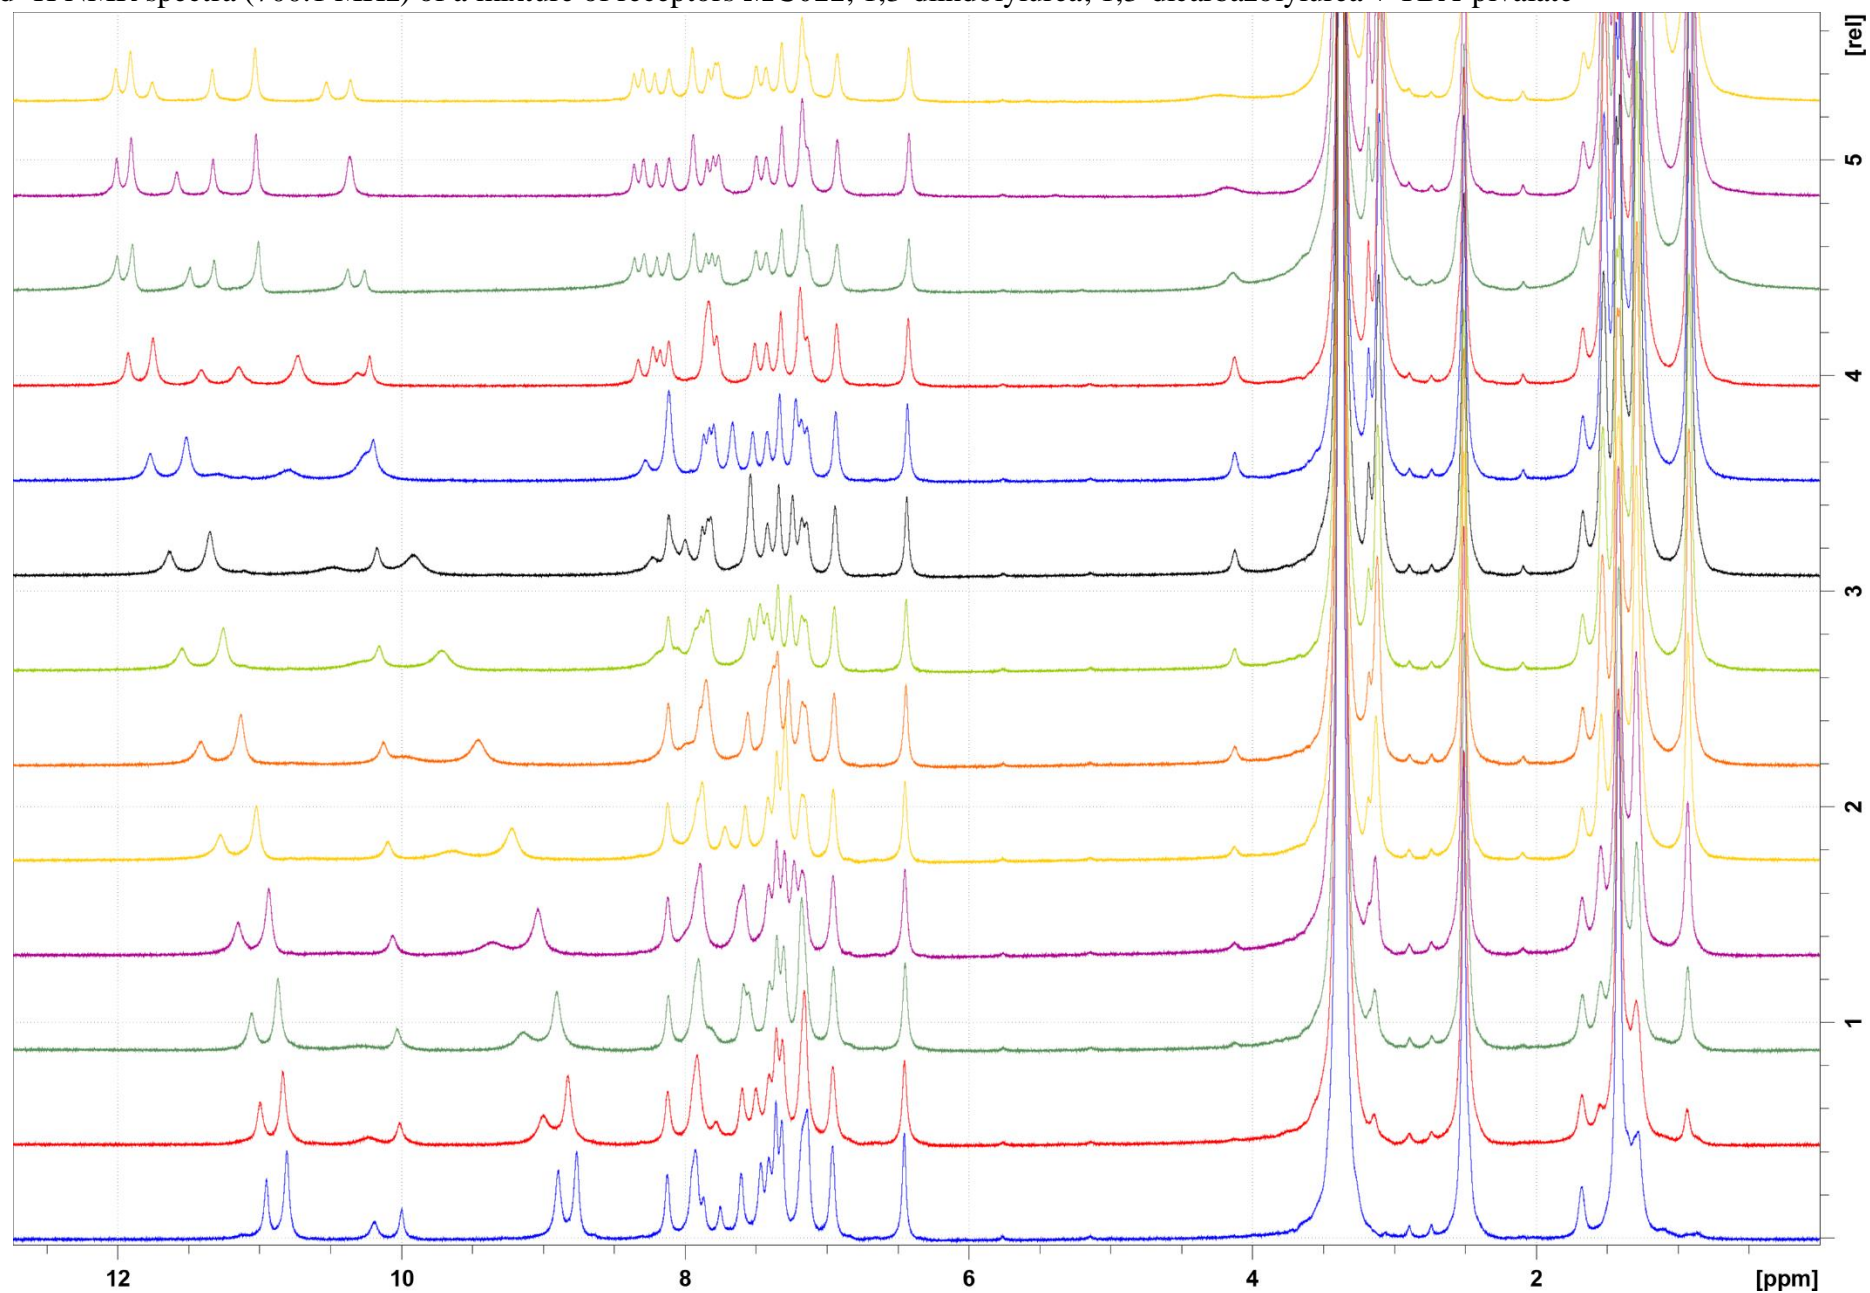

Stacked  $^1\text{H}$  NMR spectra (700.1 MHz) of a mixture of receptors **MC012**; 1,3-diindolylurea; 1,3-dicarbazolylurea + TBA-pivalate

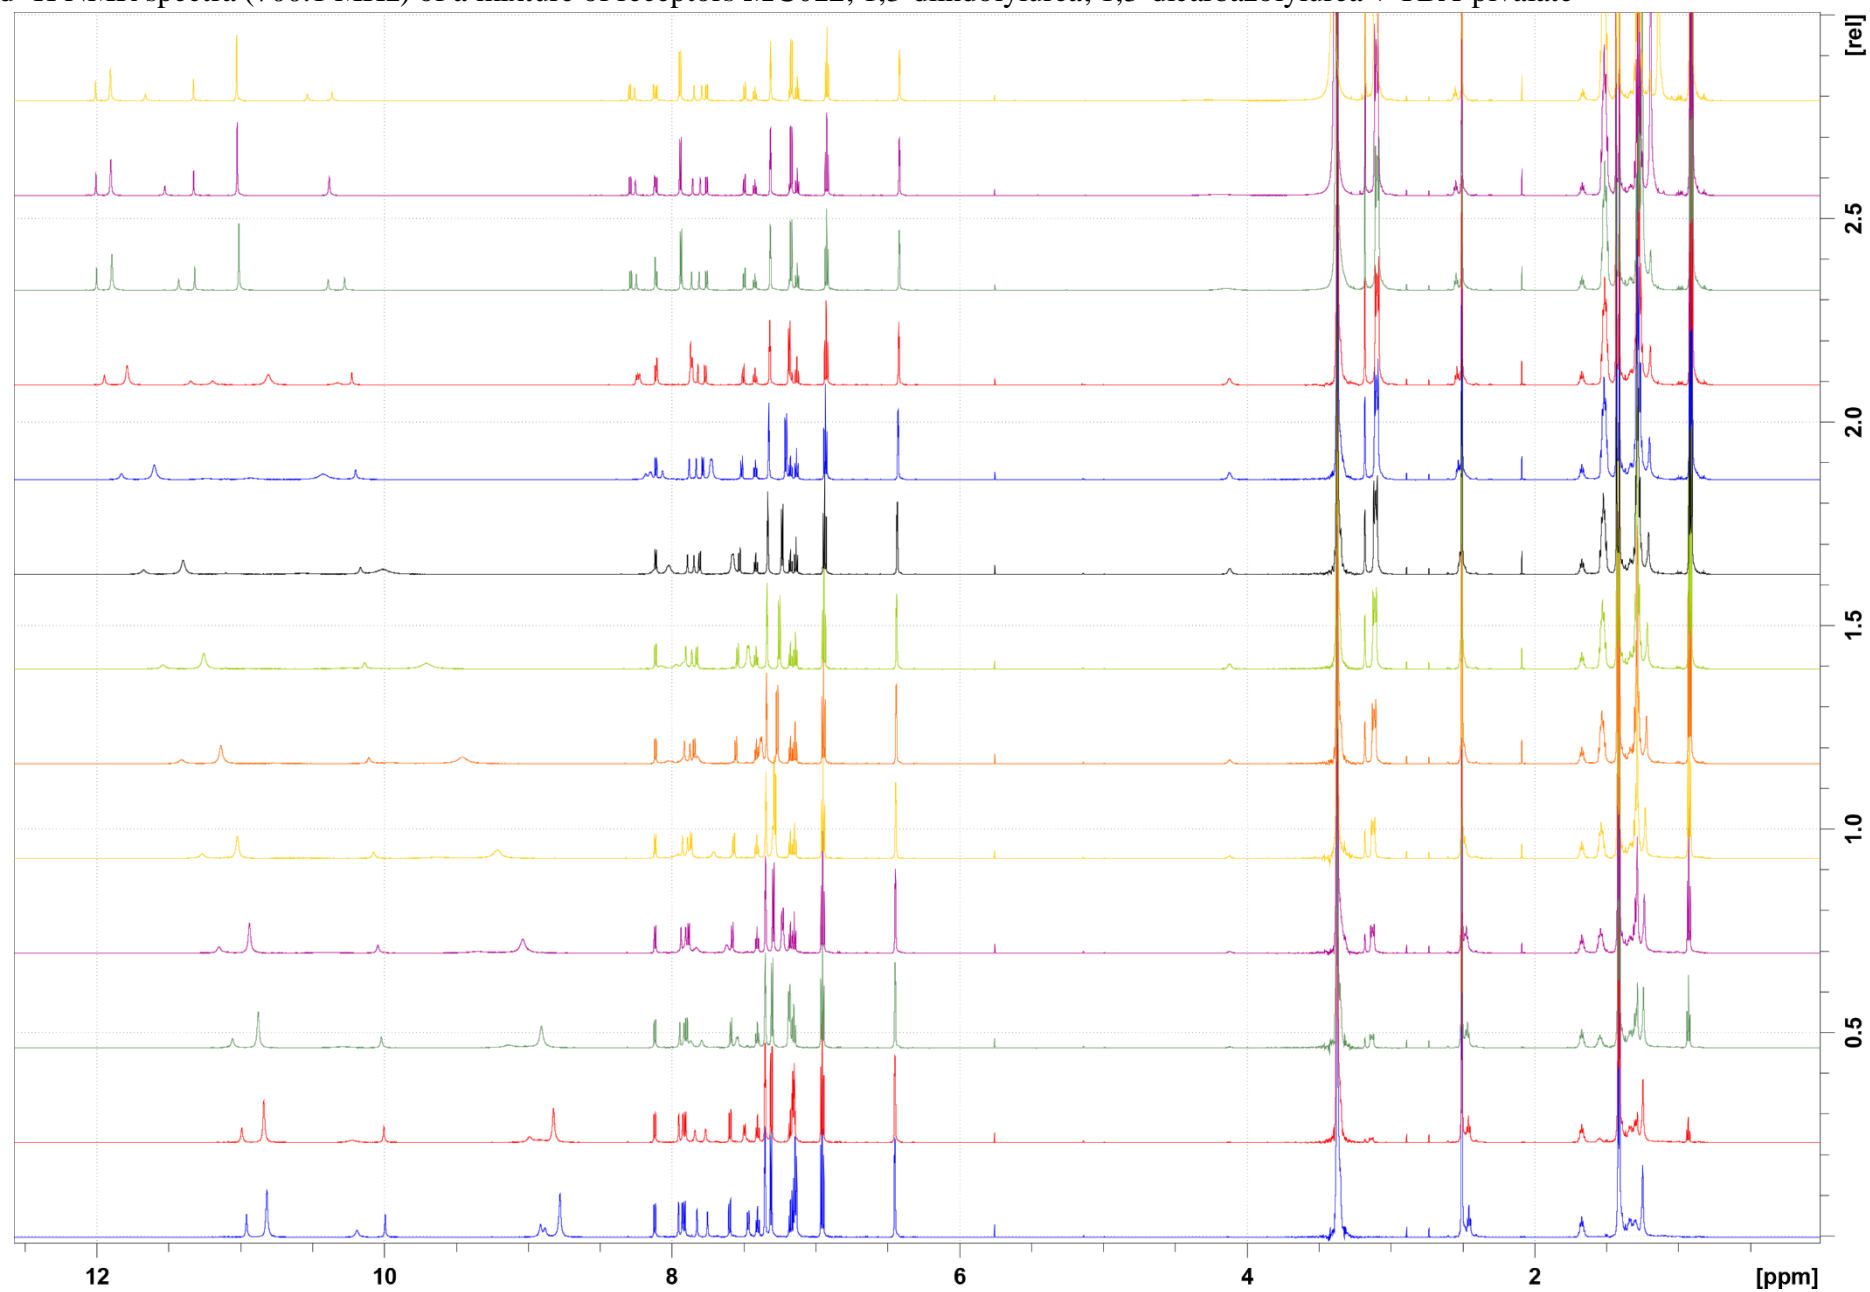

Stacked  $^1\text{H}$  NMR spectra (700.1 MHz) of a mixture of receptors **MC013**; 1,3-diindolylurea; 1,3-dicarbazolylurea + TBA-pivalate

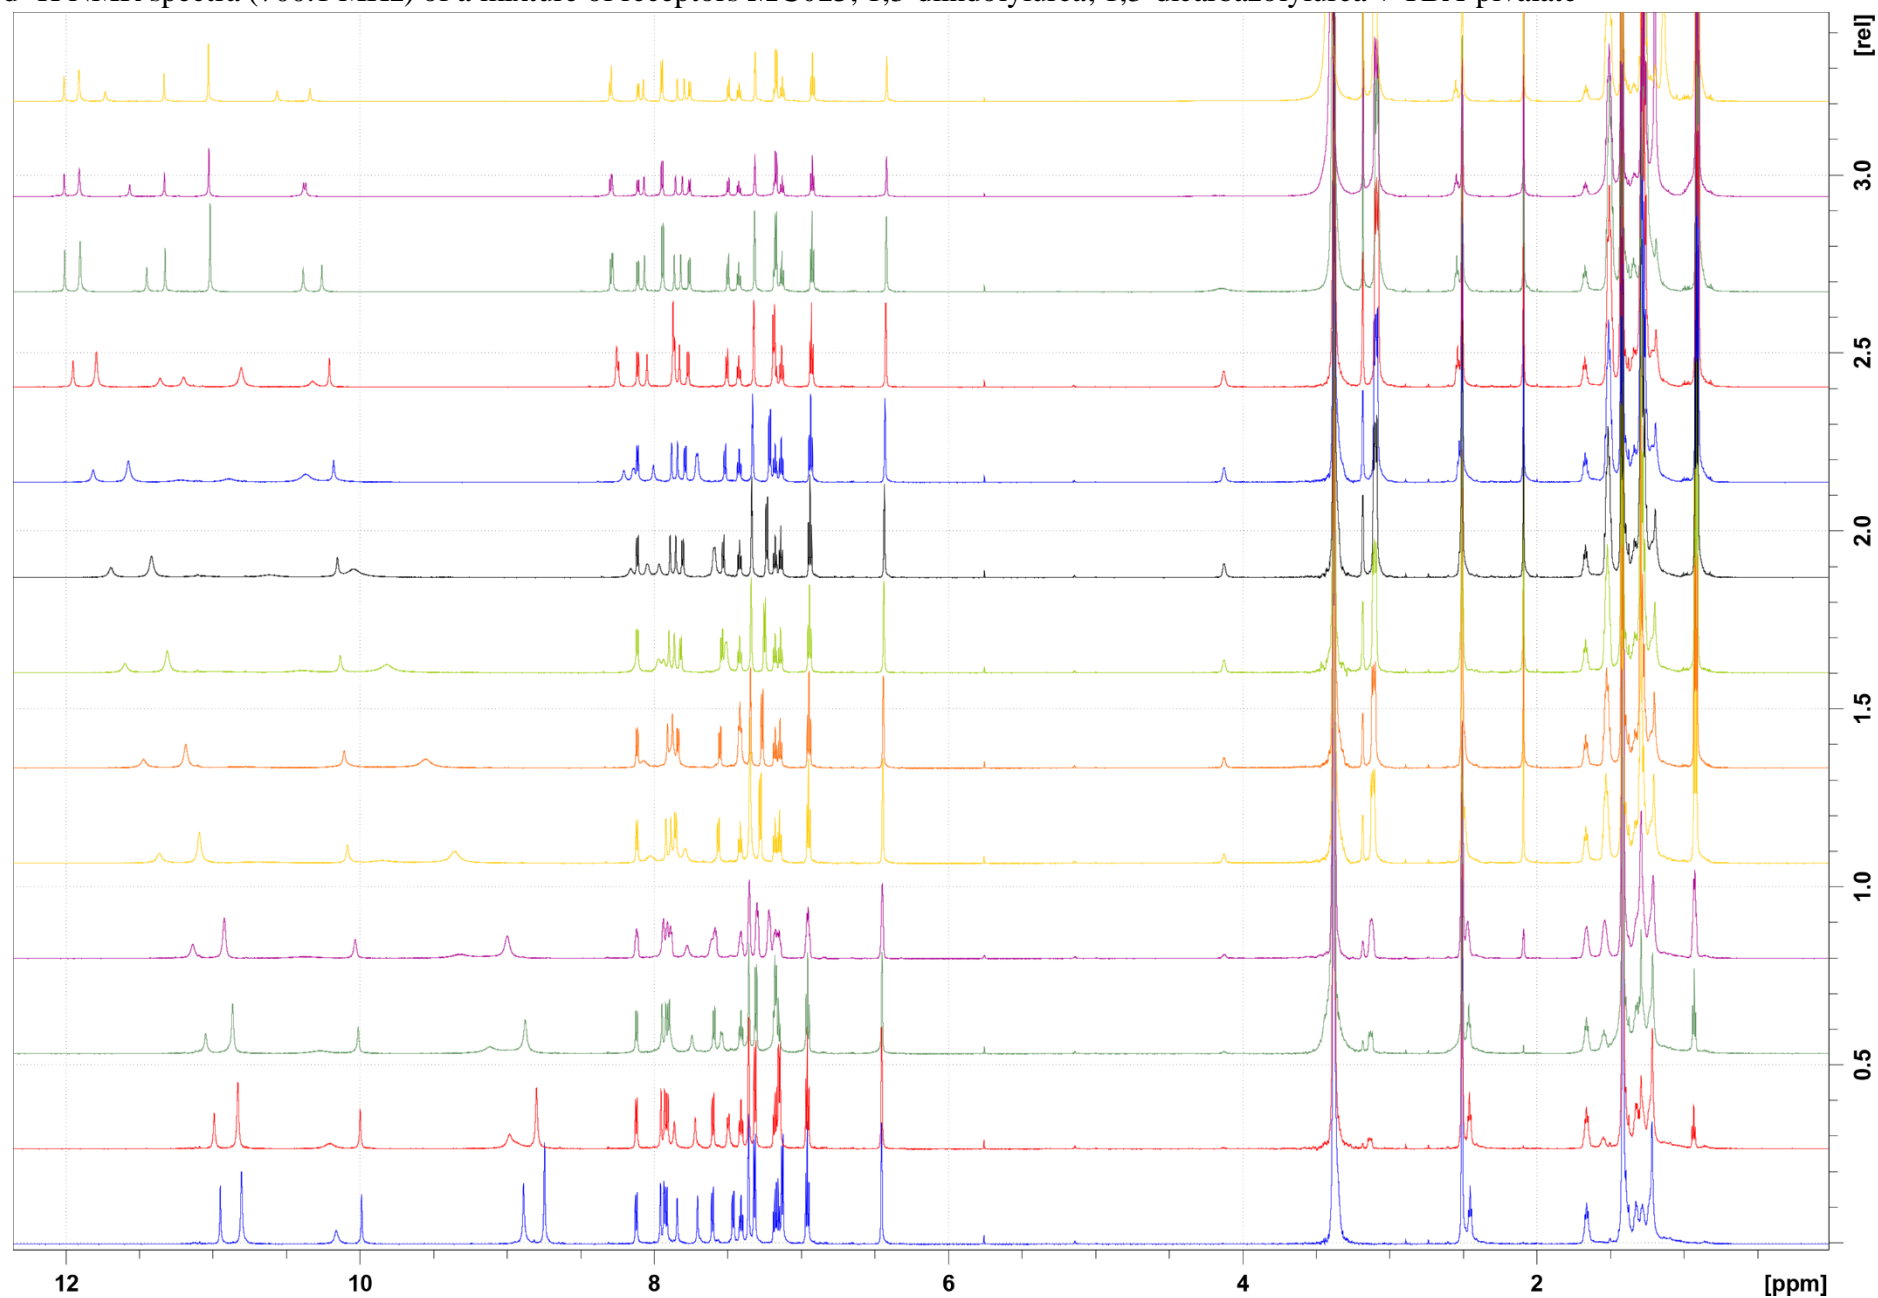

Stacked  $^1\text{H}$  NMR spectra (700.1 MHz) of a mixture of receptors **MC014**; 1,3-diindolylurea; 1,3-dicarbazolylurea + TBA-pivalate

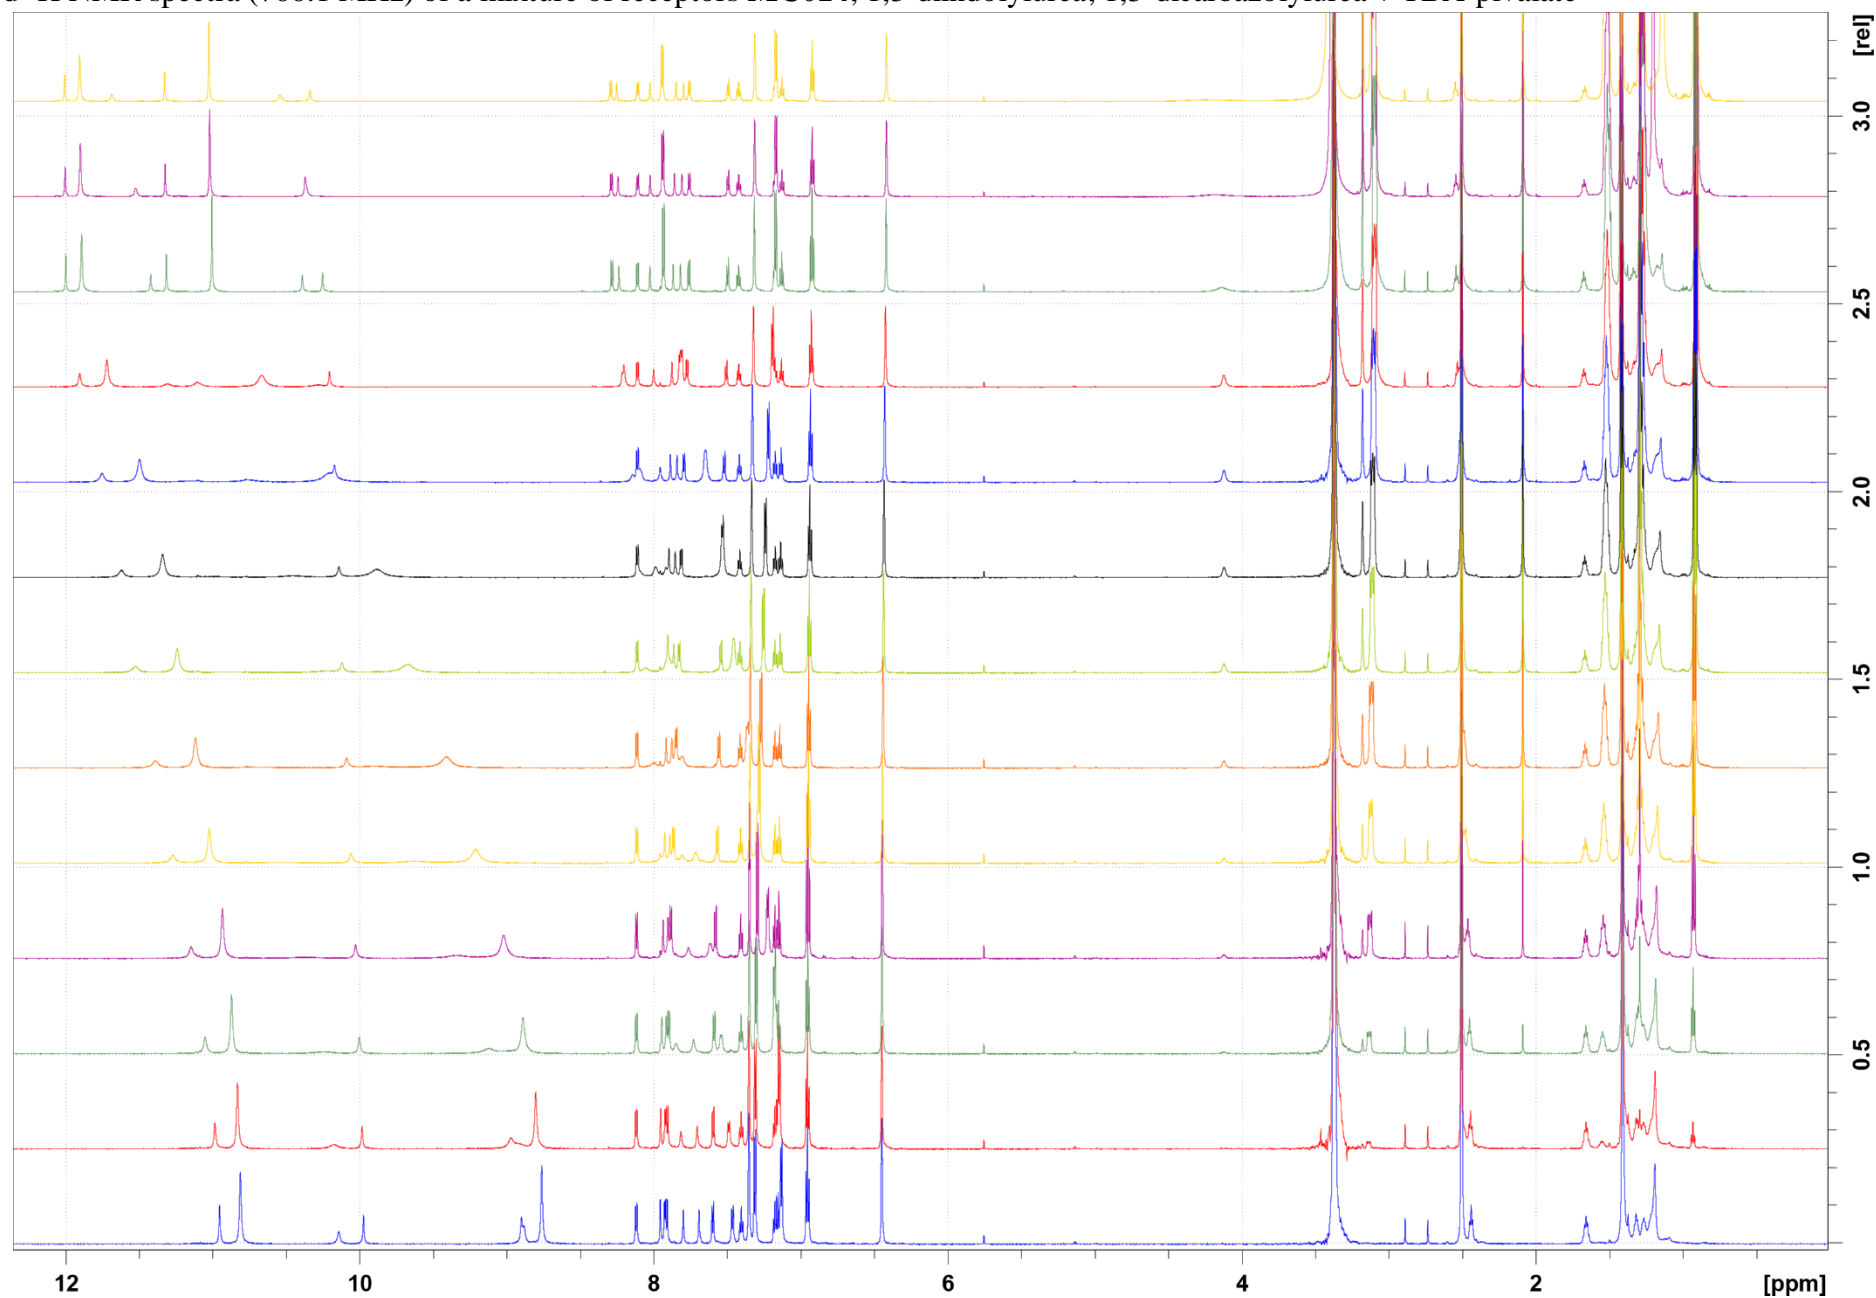

UV-vis spectra of absolute binding affinity measurement for **MC002** with TBA-lactate in 99.5%:0.5% m/m DMSO-H<sub>2</sub>O

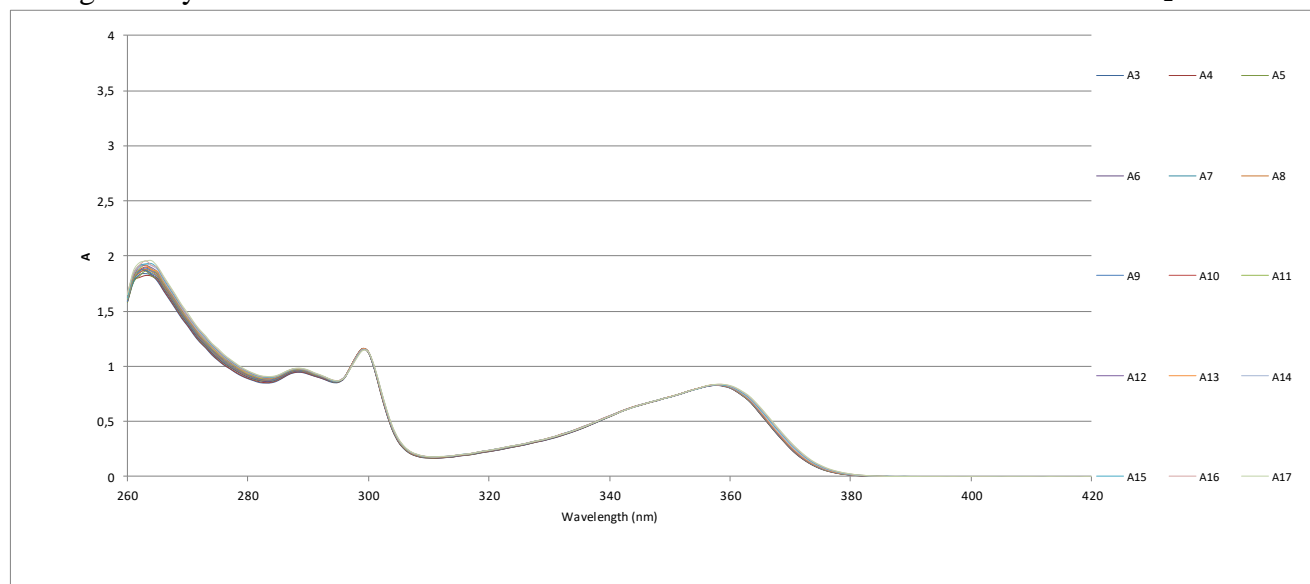

UV-vis spectra of absolute binding affinity measurement for **MC002** with TBA-pivalate 99.5%:0.5% m/m DMSO-H<sub>2</sub>O

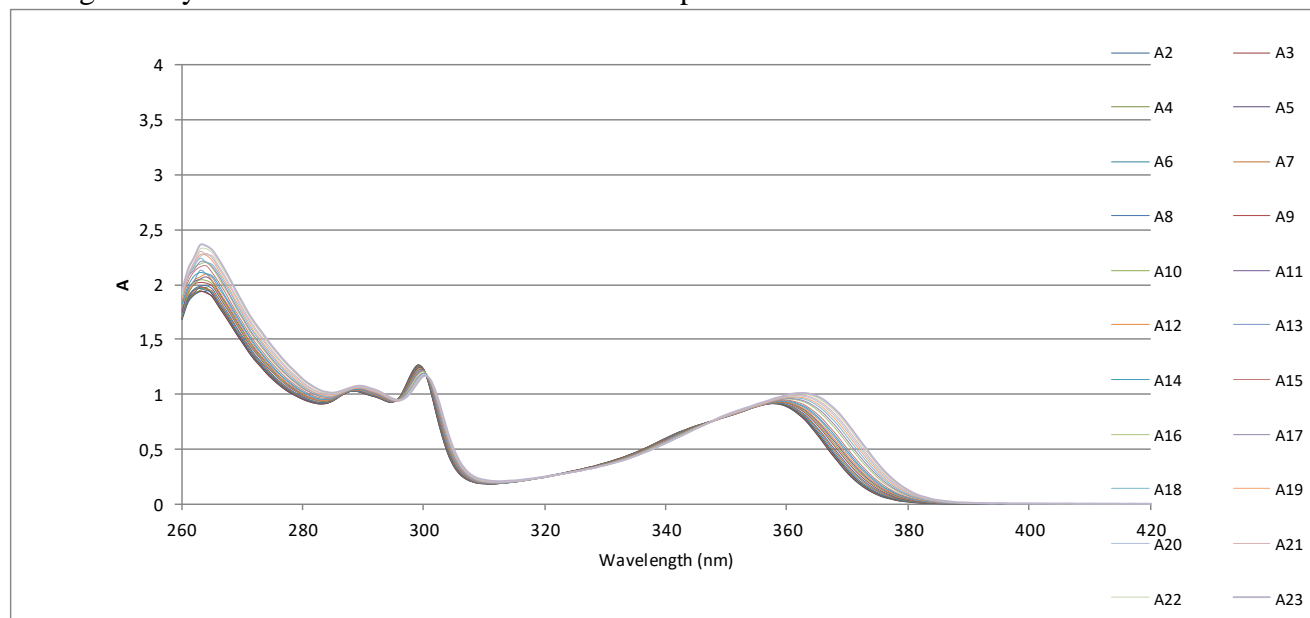



UV-vis spectra of absolute binding affinity measurement for **MC004** with TBA-acetate 90.0%:10.0% m/m DMSO-H<sub>2</sub>O

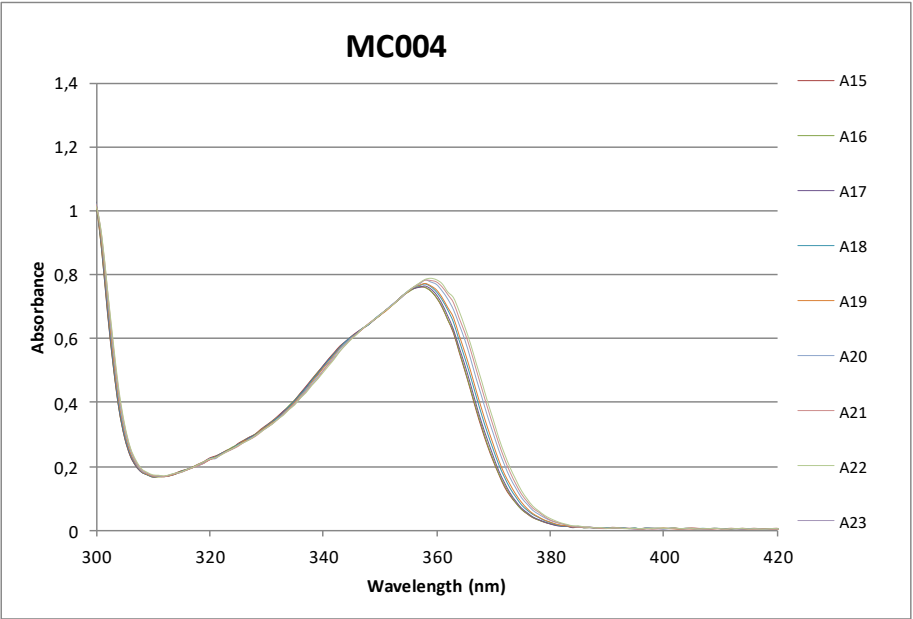

UV-vis spectra of absolute binding affinity measurement for **MC005** with TBA-acetate 90.0%:10.0% m/m DMSO-H<sub>2</sub>O

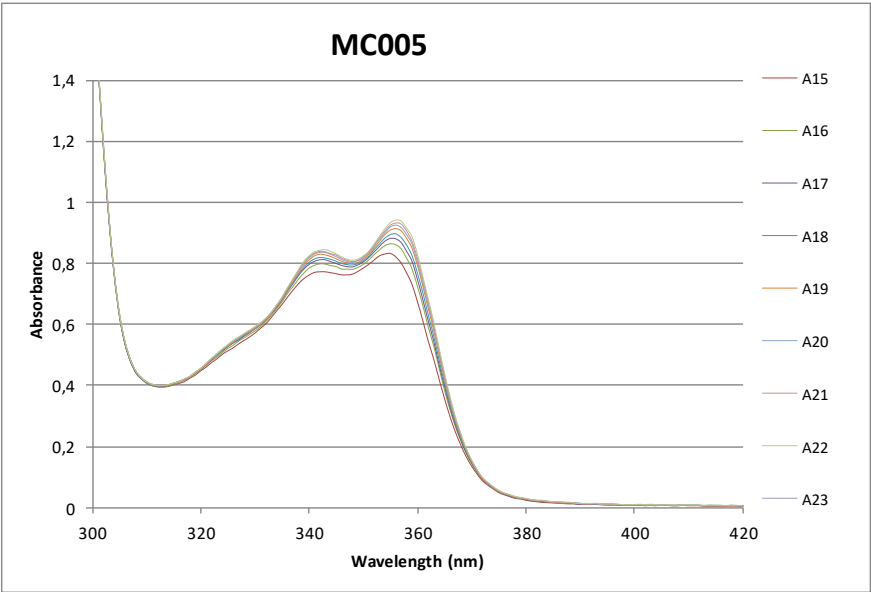

UV-vis spectra of absolute binding affinity measurement for **MC007** with TBA-acetate 90.0%:10.0% m/m DMSO-H<sub>2</sub>O

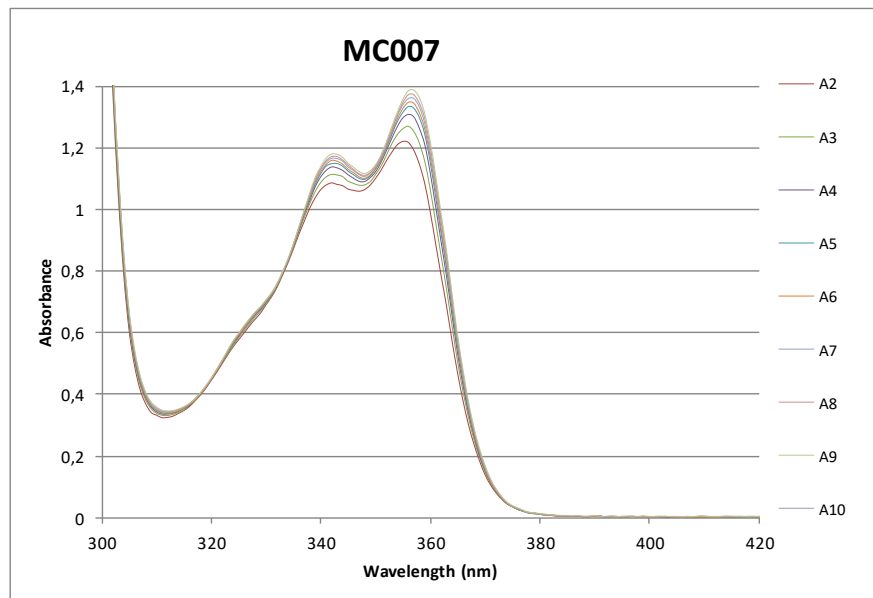

UV-vis spectra of absolute binding affinity measurement for **MC008** with TBA-acetate 90.0%:10.0% m/m DMSO-H<sub>2</sub>O

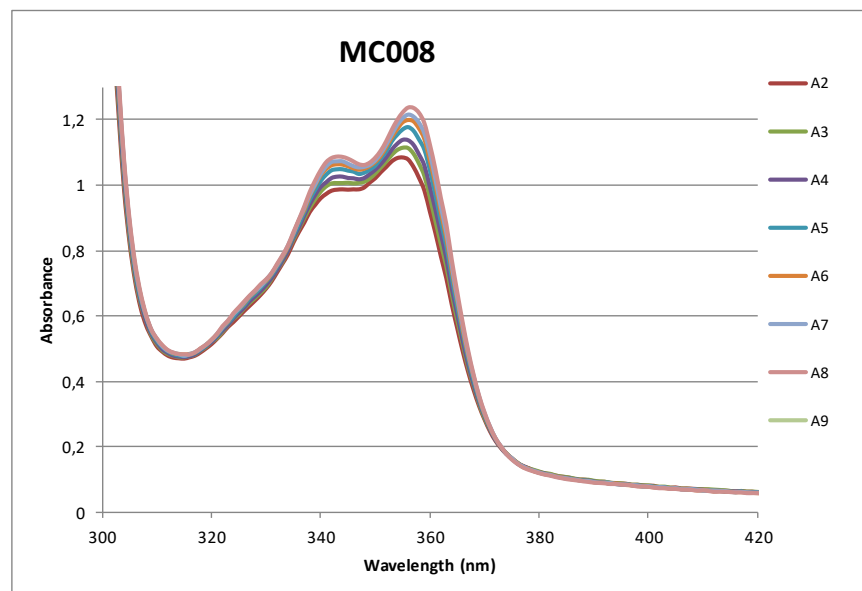

UV-vis spectra of absolute binding affinity measurement for **MC009** with TBA-acetate 90.0%:10.0% m/m DMSO-H<sub>2</sub>O

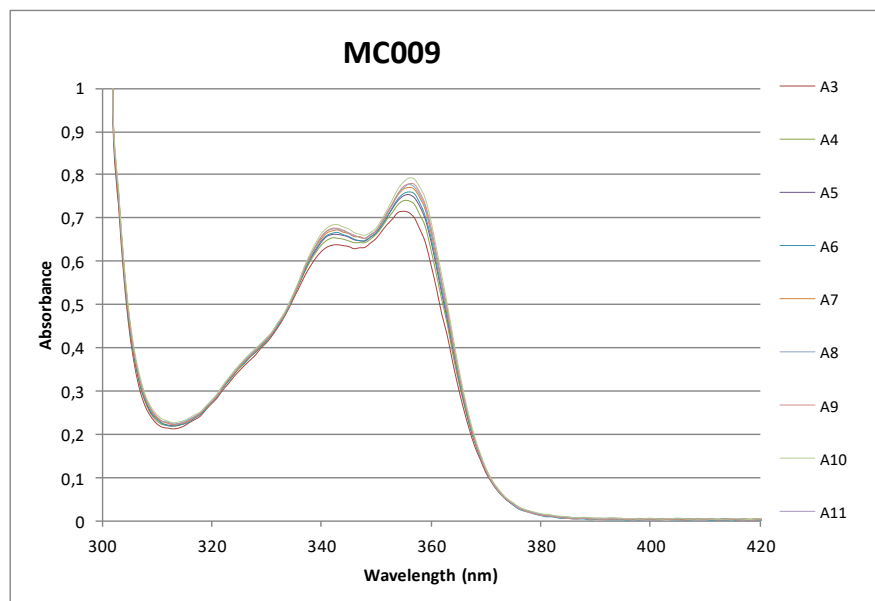

UV-vis spectra of absolute binding affinity measurement for **MC004** with TBA-benzoate 90.0%:10.0% m/m DMSO-H<sub>2</sub>O

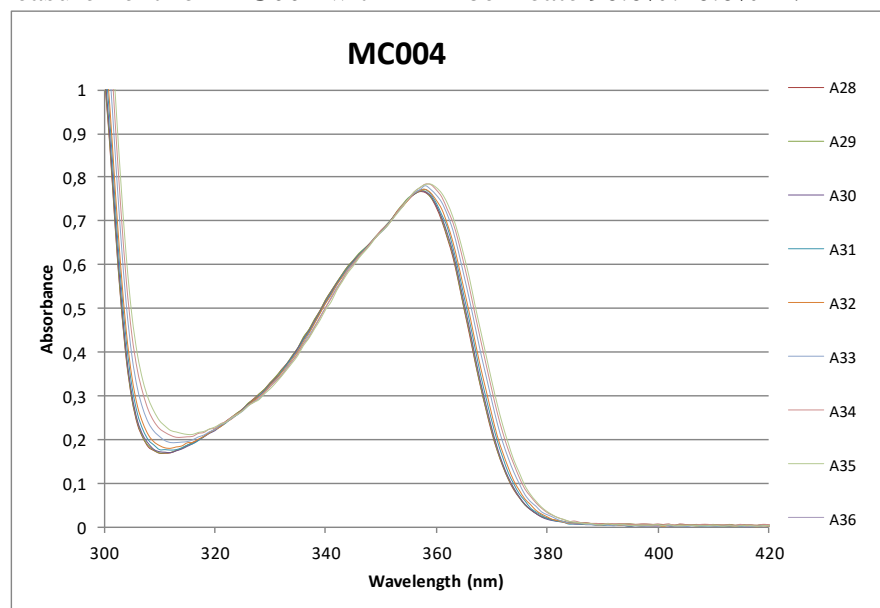

UV-vis spectra of absolute binding affinity measurement for **MC005** with TBA-benzoate 90.0%:10.0% m/m DMSO-H<sub>2</sub>O

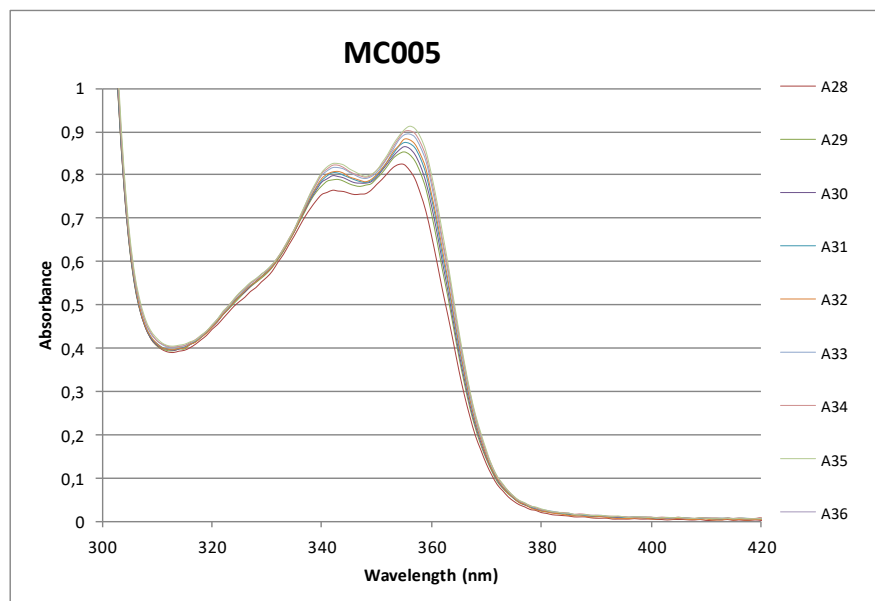

UV-vis spectra of absolute binding affinity measurement for **MC007** with TBA-benzoate 90.0%:10.0% m/m DMSO-H<sub>2</sub>O

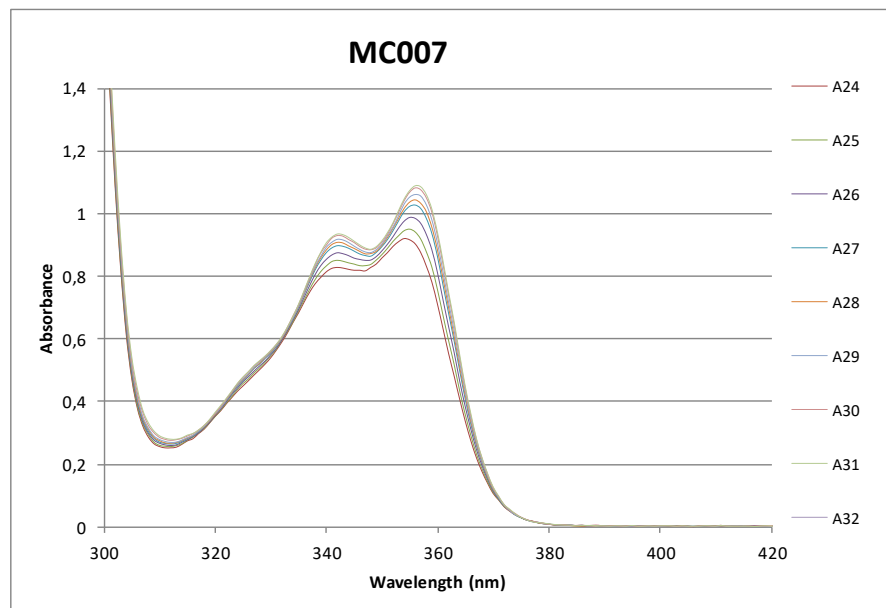

UV-vis spectra of absolute binding affinity measurement for **MC008** with TBA-benzoate 90.0%:10.0% m/m DMSO-H<sub>2</sub>O

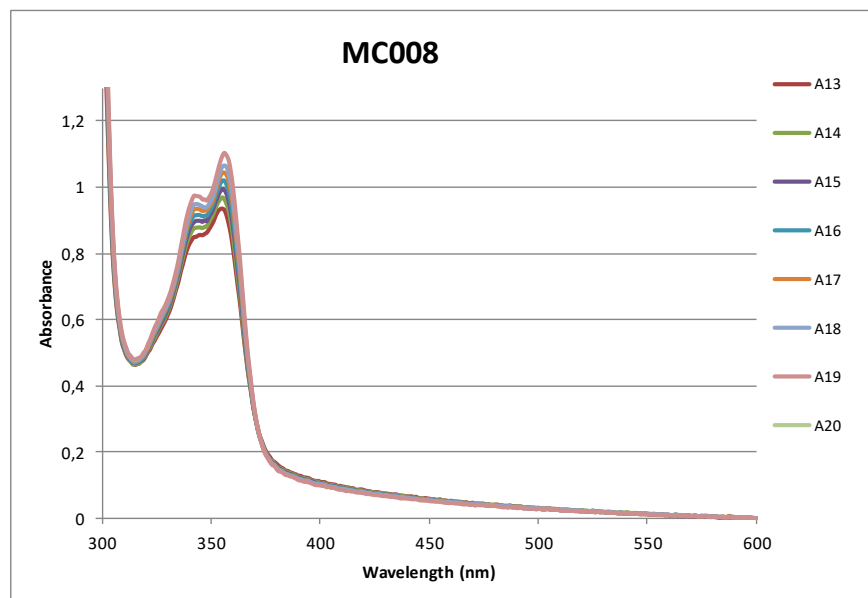

UV-vis spectra of absolute binding affinity measurement for **MC009** with TBA-benzoate 90.0%:10.0% m/m DMSO-H<sub>2</sub>O

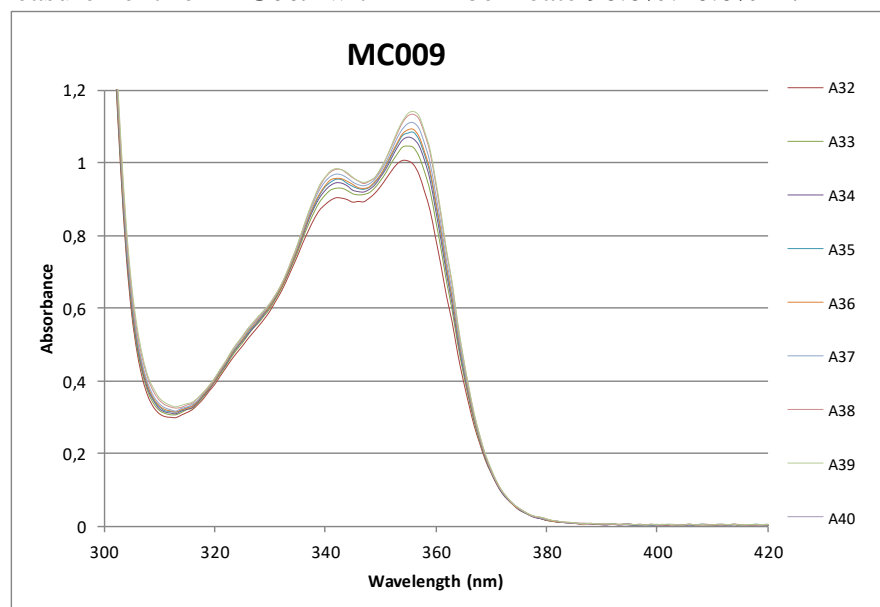

UV-vis spectra of absolute binding affinity measurement for **MC004** with TBA-formate 90.0%:10.0% m/m DMSO-H<sub>2</sub>O

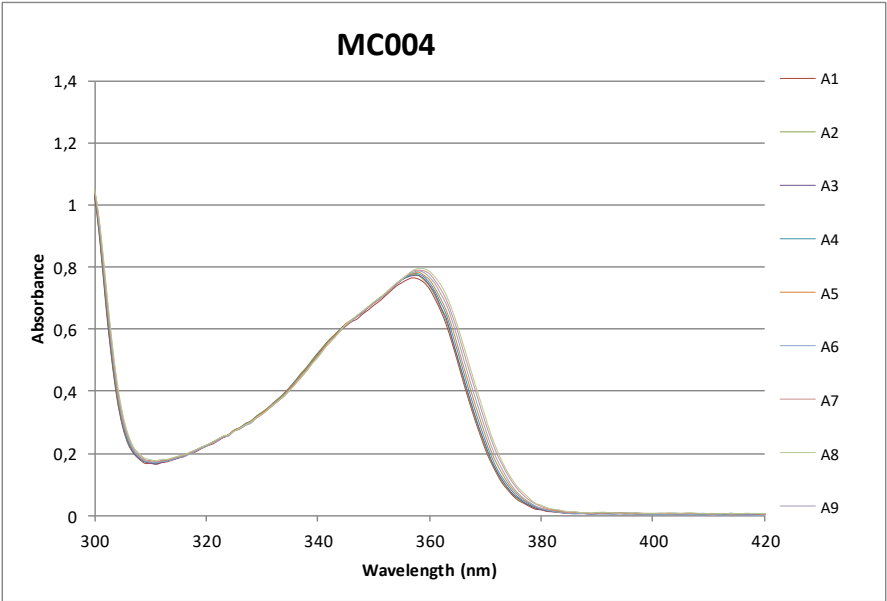

UV-vis spectra of absolute binding affinity measurement for **MC005** with TBA-formate 90.0%:10.0% m/m DMSO-H<sub>2</sub>O

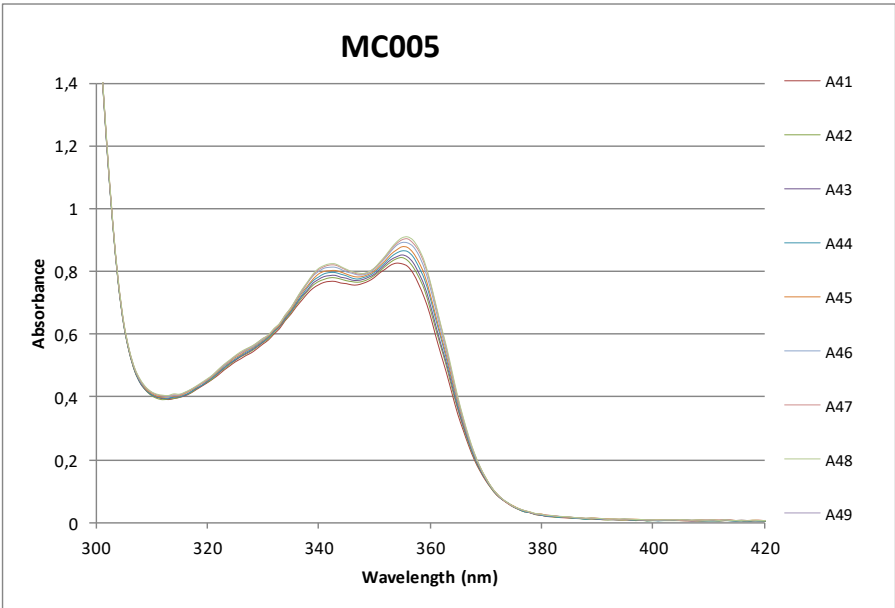

UV-vis spectra of absolute binding affinity measurement for **MC007** with TBA-formate 90.0%:10.0% m/m DMSO-H<sub>2</sub>O

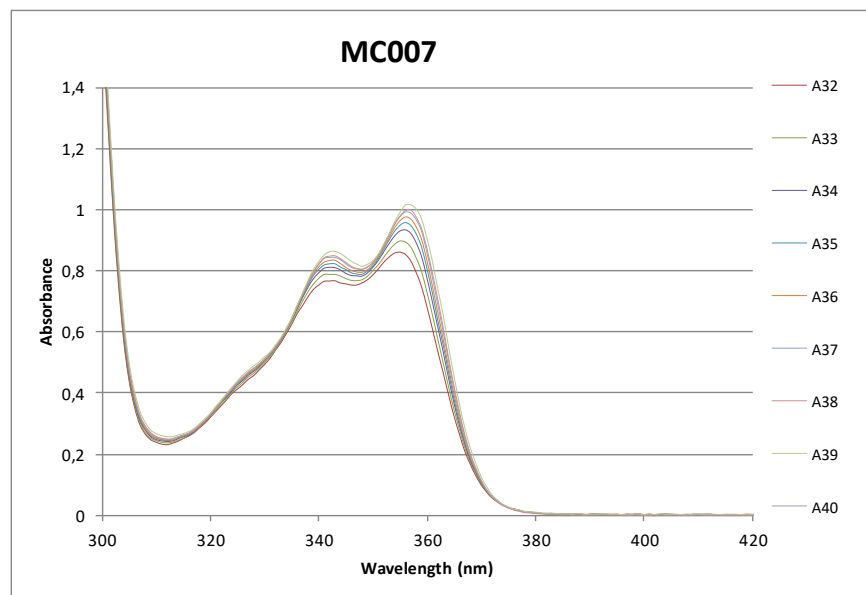

UV-vis spectra of absolute binding affinity measurement for **MC008** with TBA-formate 90.0%:10.0% m/m DMSO-H<sub>2</sub>O

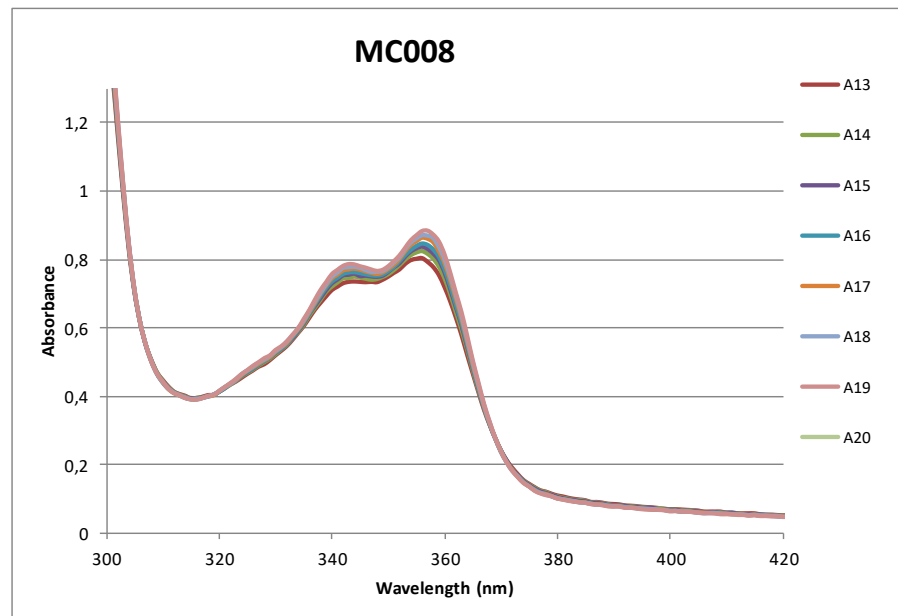

UV-vis spectra of absolute binding affinity measurement for **MC009** with TBA-formate 90.0%:10.0% m/m DMSO-H<sub>2</sub>O

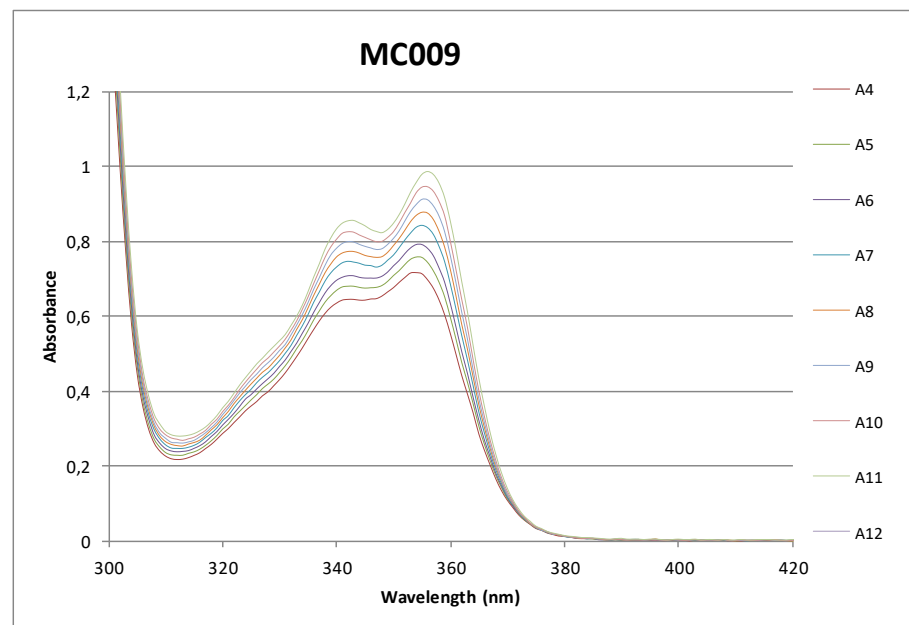

UV-vis spectra of absolute binding affinity measurement for **MC004** with TBA-lactate 90.0%:10.0% m/m DMSO-H<sub>2</sub>O

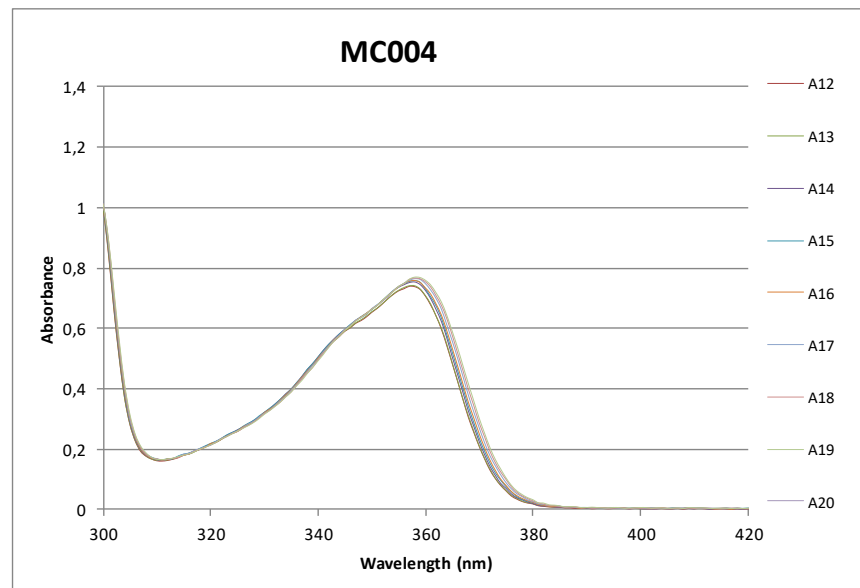



UV-vis spectra of absolute binding affinity measurement for **MC005** with TBA-lactate 90.0%:10.0% m/m DMSO-H<sub>2</sub>O

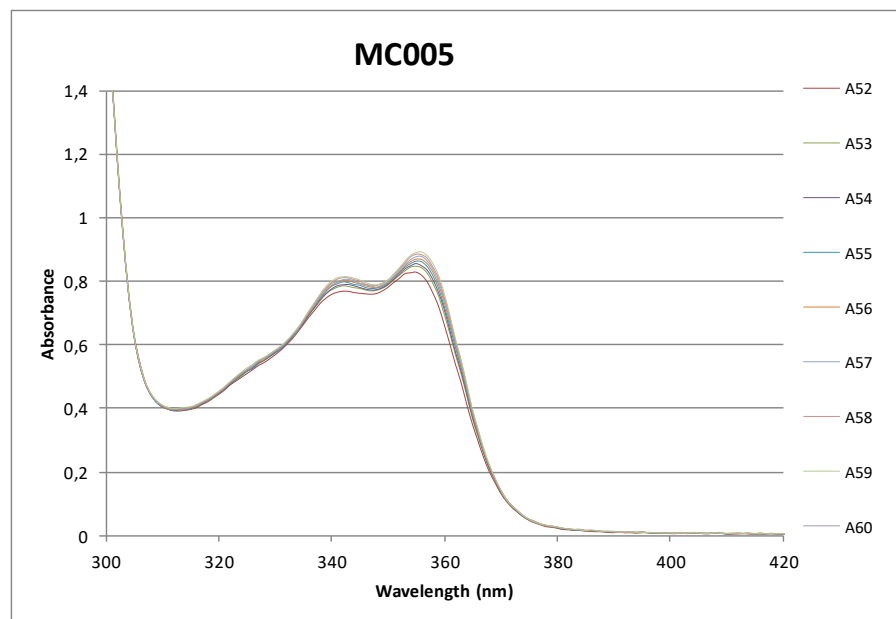

UV-vis spectra of absolute binding affinity measurement for **MC007** with TBA-lactate 90.0%:10.0% m/m DMSO-H<sub>2</sub>O

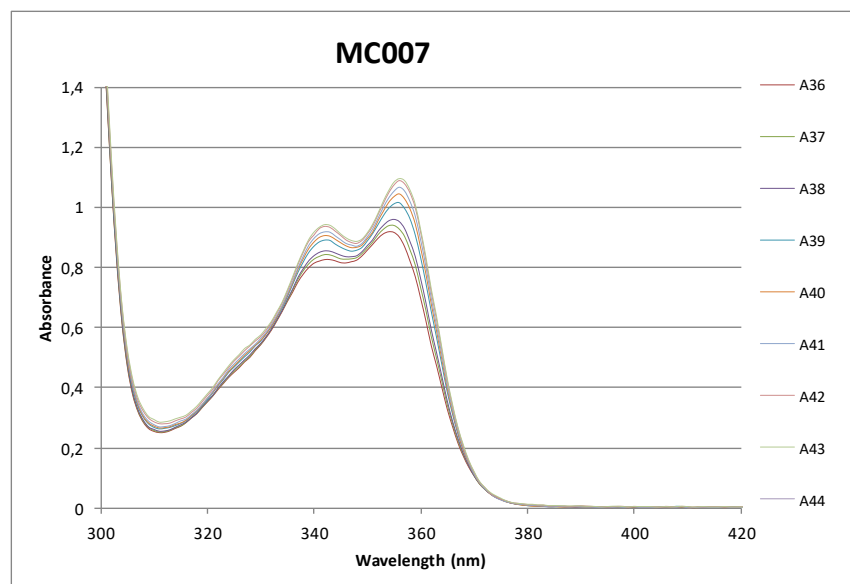

UV-vis spectra of absolute binding affinity measurement for **MC008** with TBA-lactate 90.0%:10.0% m/m DMSO-H<sub>2</sub>O

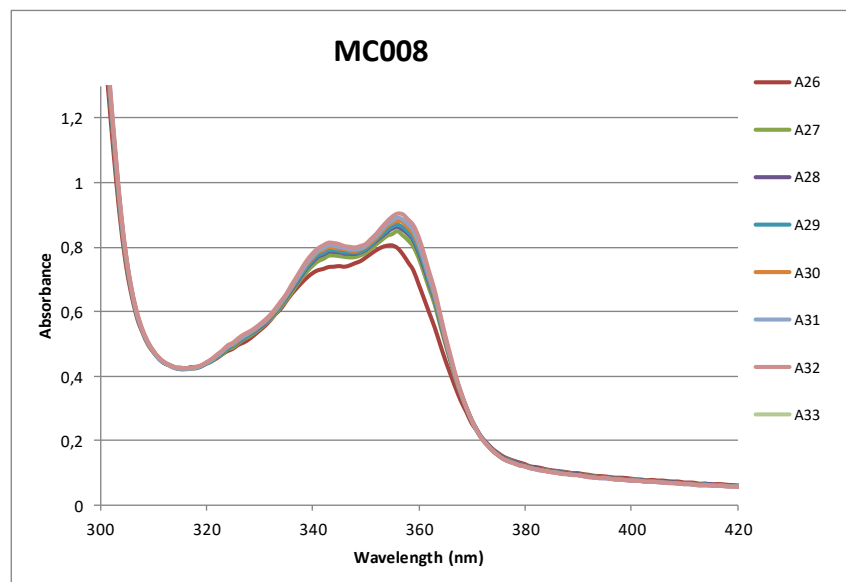

UV-vis spectra of absolute binding affinity measurement for **MC009** with TBA-lactate 90.0%:10.0% m/m DMSO-H<sub>2</sub>O

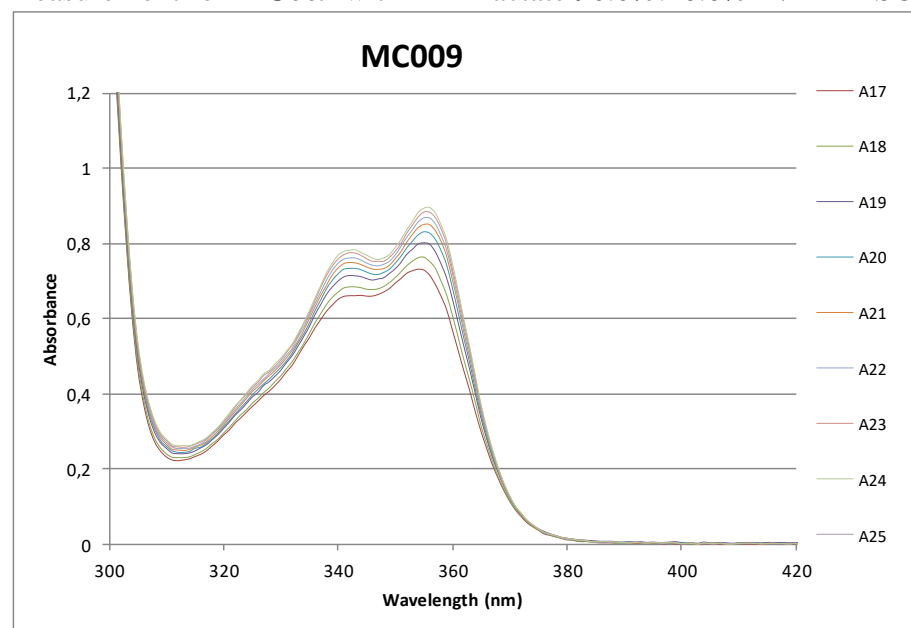

UV-vis spectra of absolute binding affinity measurement for **MC004** with TBA-pivalate 90.0%:10.0% m/m DMSO-H<sub>2</sub>O

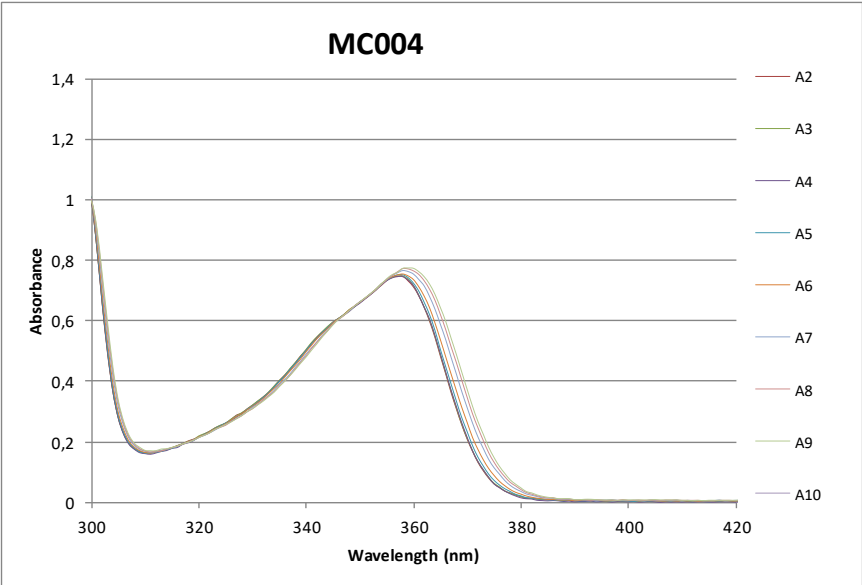

UV-vis spectra of absolute binding affinity measurement for **MC005** with TBA-pivalate 90.0%:10.0% m/m DMSO-H<sub>2</sub>O

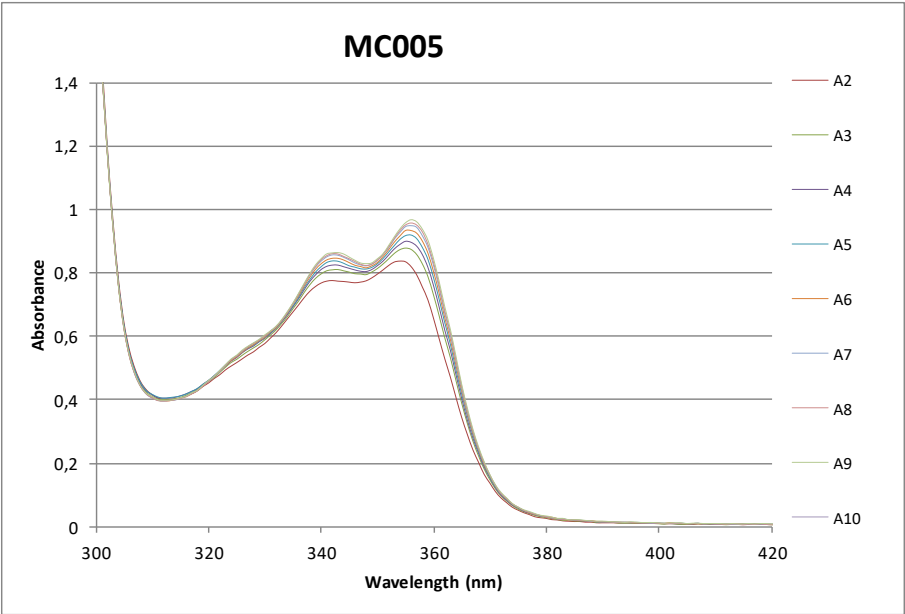

UV-vis spectra of absolute binding affinity measurement for **MC007** with TBA-pivalate 90.0%:10.0% m/m DMSO-H<sub>2</sub>O

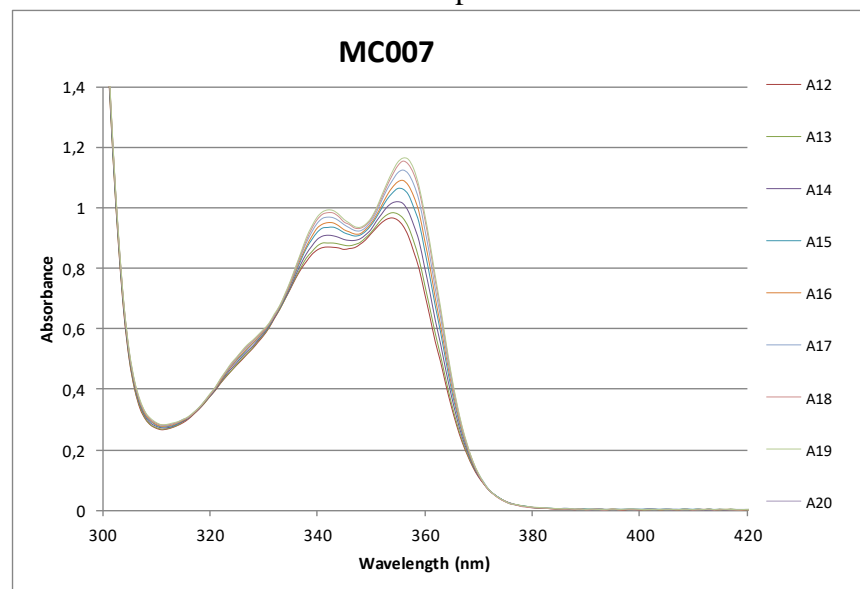

UV-vis spectra of absolute binding affinity measurement for **MC008** with TBA-pivalate 90.0%:10.0% m/m DMSO-H<sub>2</sub>O

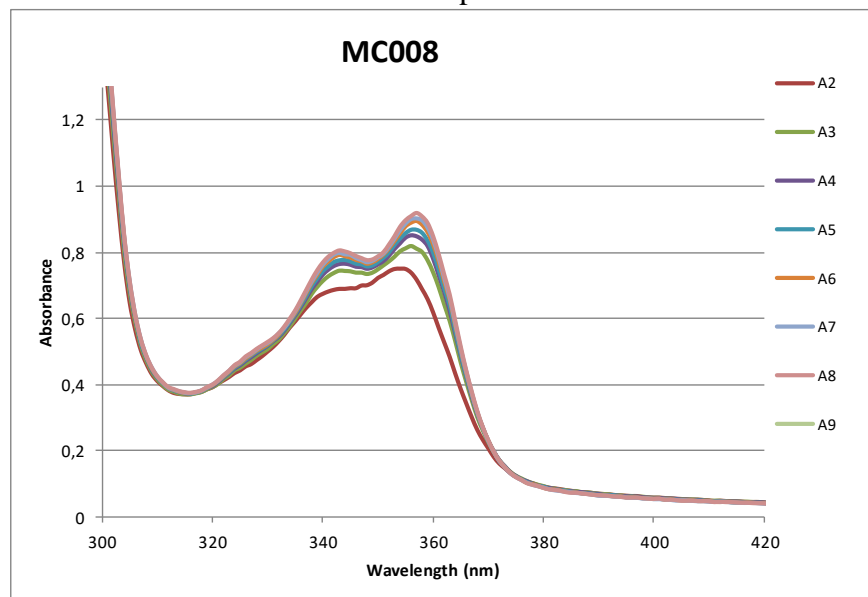

UV-vis spectra of absolute binding affinity measurement for **MC009** with TBA-pivalate 90.0%:10.0% m/m DMSO-H2O

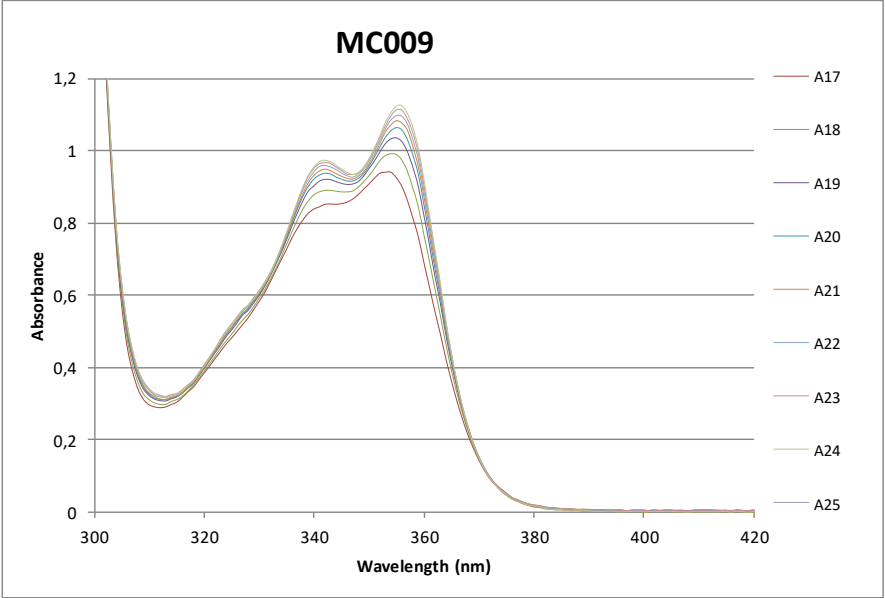

Lowest energy conformation of receptor **CZ016**

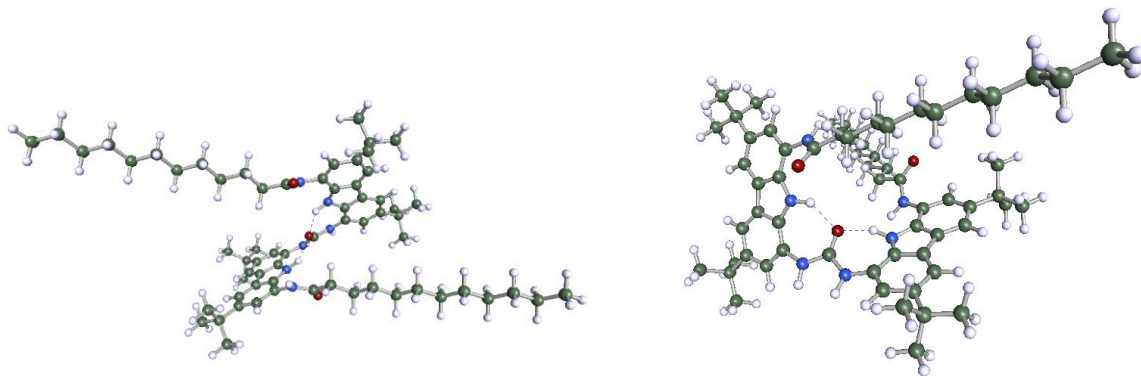

$G = -1939212.08127$  kcal/mol

Lowest energy conformation of receptor **CZ016** with pivalate anion

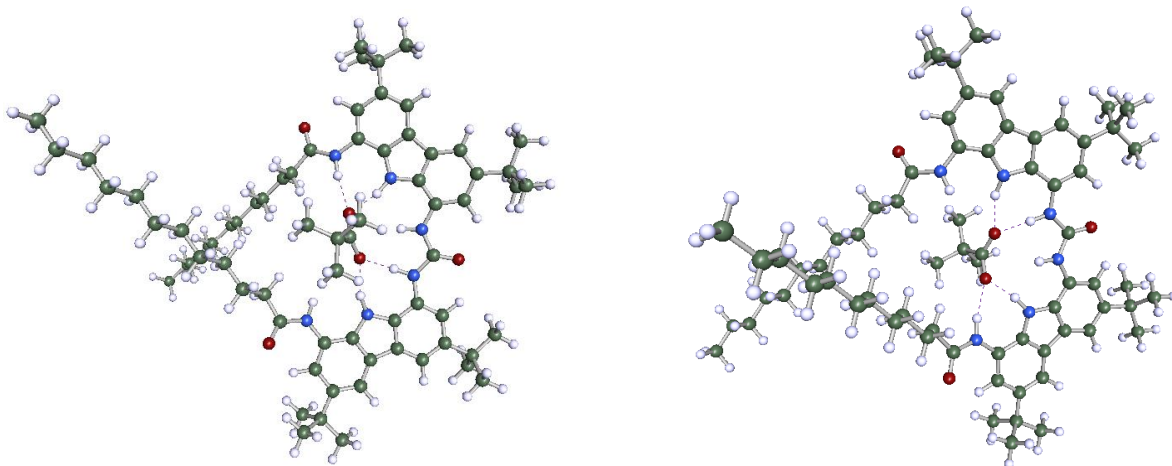

$G = -2156792.28741$  kcal/mol

Lowest energy conformation of receptor **CZ016** with acetate anion

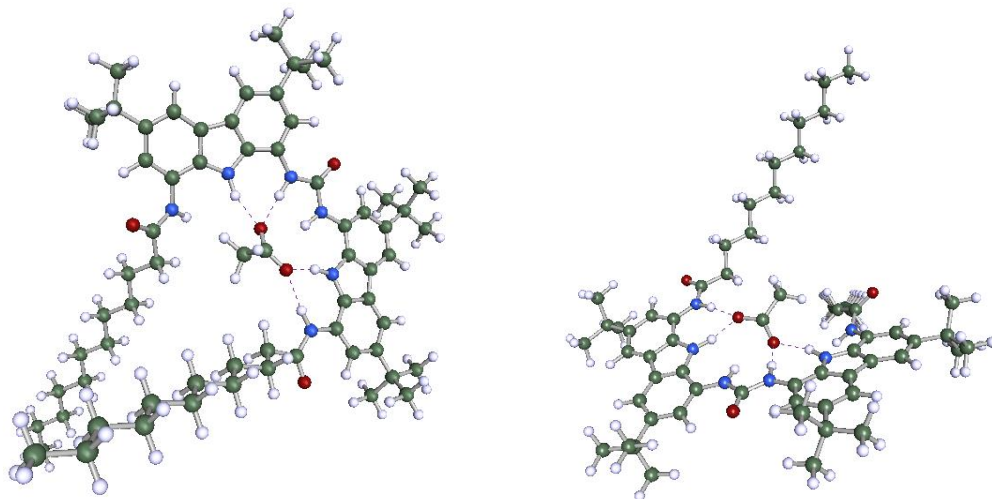

$G = -2082766.14645 \text{ kcal/mol}$

Lowest energy conformation of receptor **CZ016** with benzoate anion

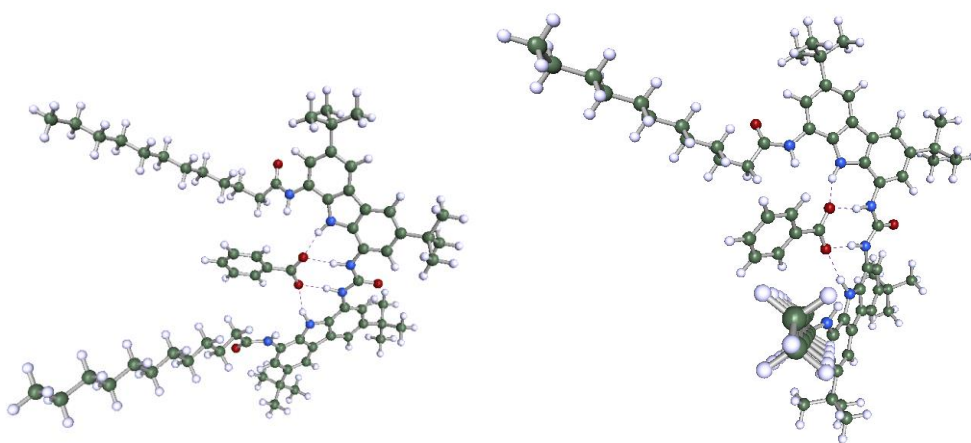

$G = 2203124.50120 \text{ kcal/mol}$

Lowest energy conformation of receptor **CZ016** with lactate anion

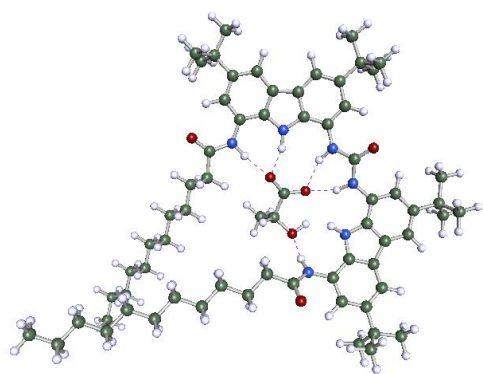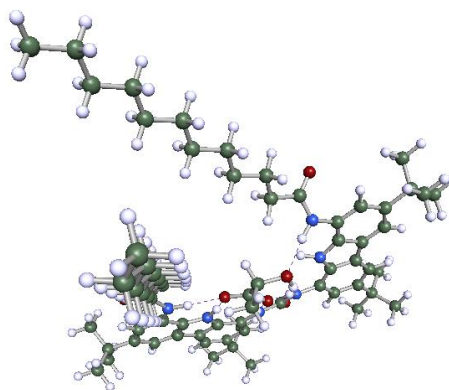

$G = -2154669.70262$  kcal/mol

Lowest energy conformation of receptor **CZ016** with formate anion

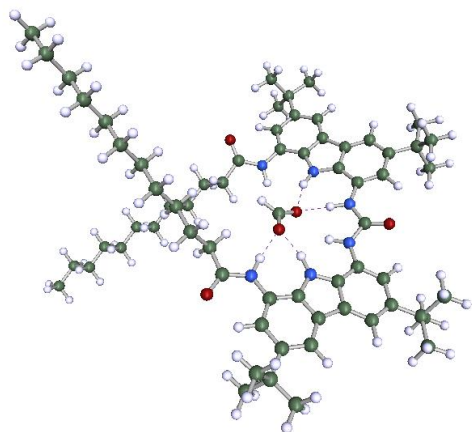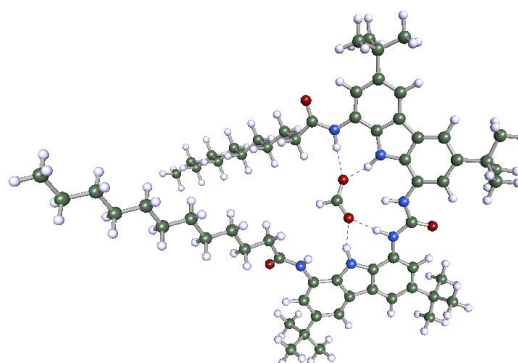

$G = -2058084.08381$  kcal/mol



Lowest energy conformation of receptor **MC001**

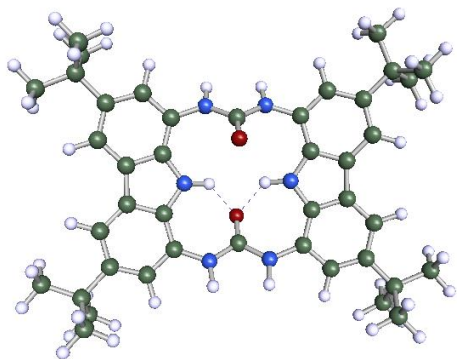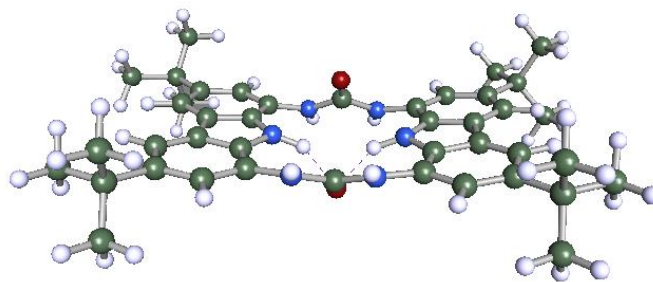

$G = -1324377.24934$  kcal/mol

Lowest energy conformation of receptor **MC001** with pivalate anion

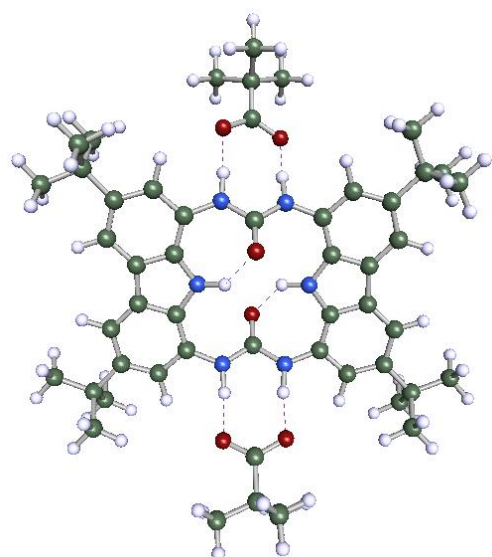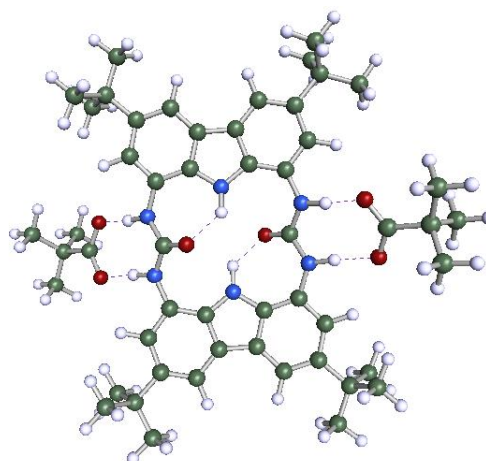

$G = -1759540.52493$  kcal/mol

Lowest energy conformation of receptor **MC001** with acetate anion

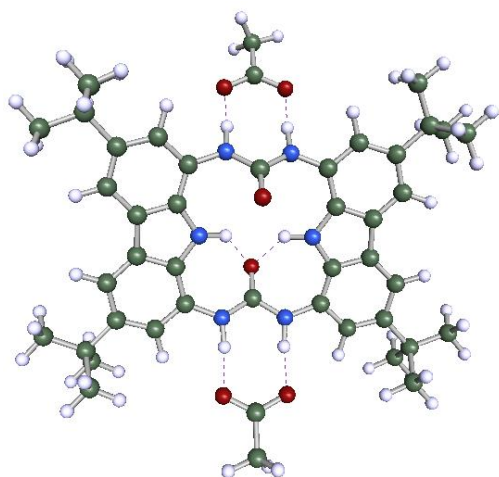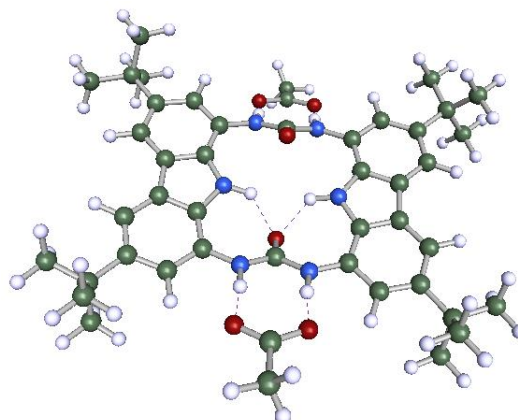

$G = -1611476.38251$  kcal/mol

Lowest energy conformation of receptor **MC001** with benzoate anion

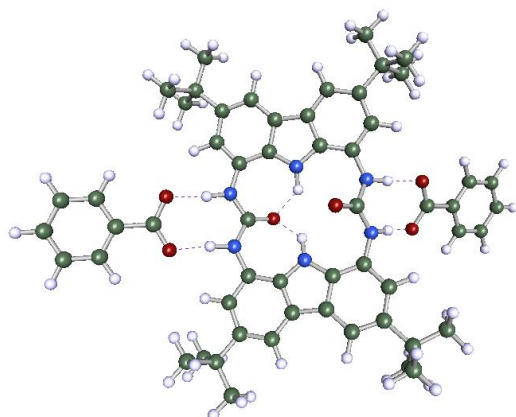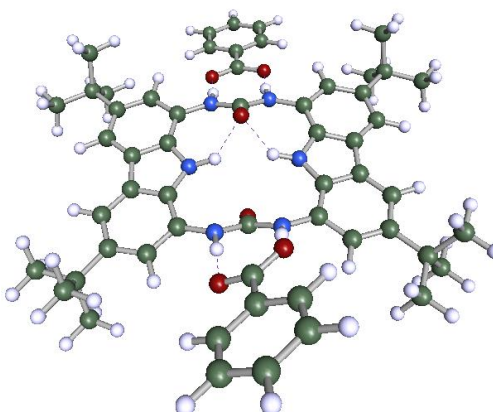

$G = -1852203.69392$  kcal/mol

Lowest energy conformation of receptor **MC001** with lactate anion

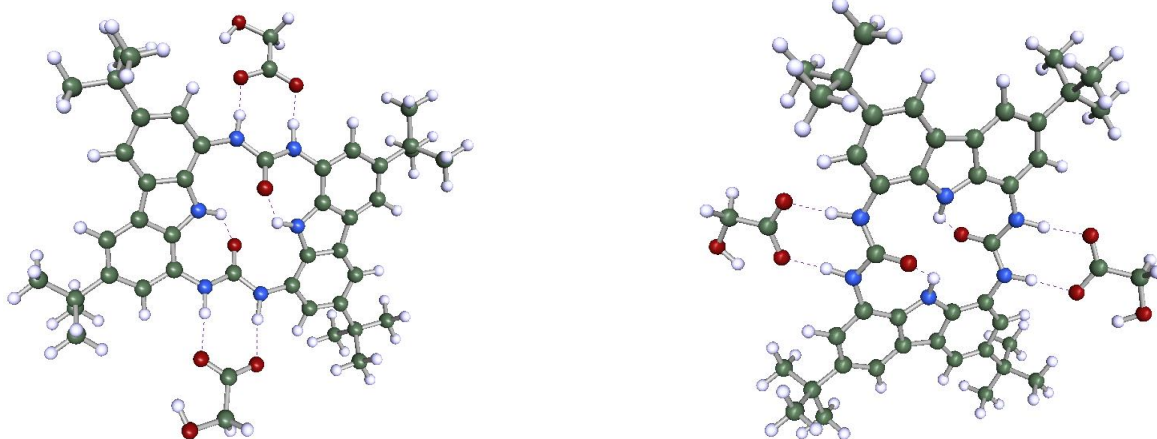

$G = -1705929.89393$  kcal/mol

Lowest energy conformation of receptor **MC001** with formate anion

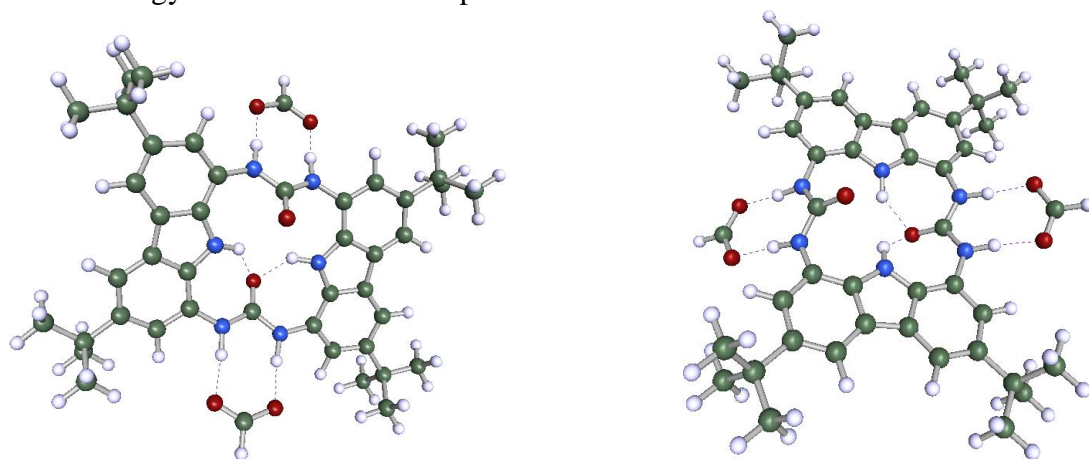

$G = -1562111.52768$  kcal/mol

Lowest energy conformation of receptor **MC002**

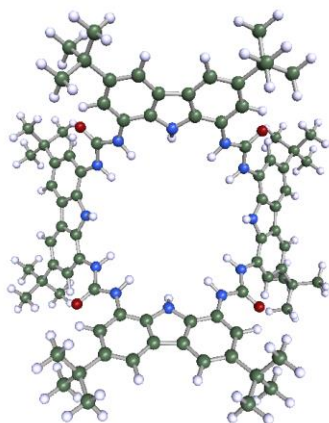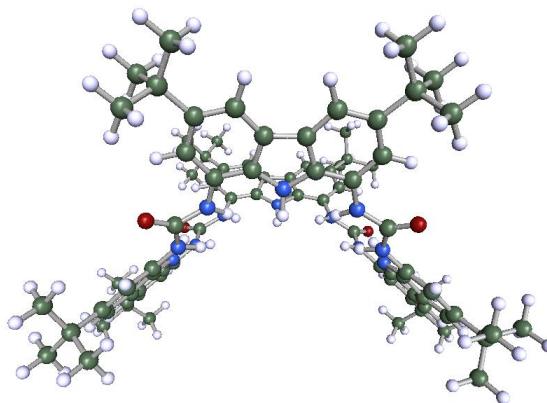

$G = -2648766.27994$  kcal/mol

Lowest energy conformation of receptor **MC002** with pivalate anion

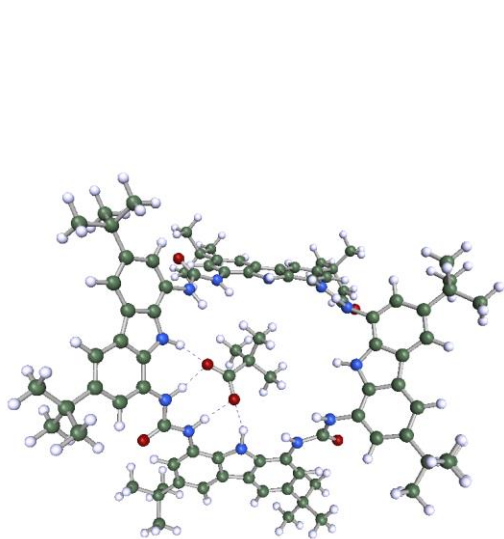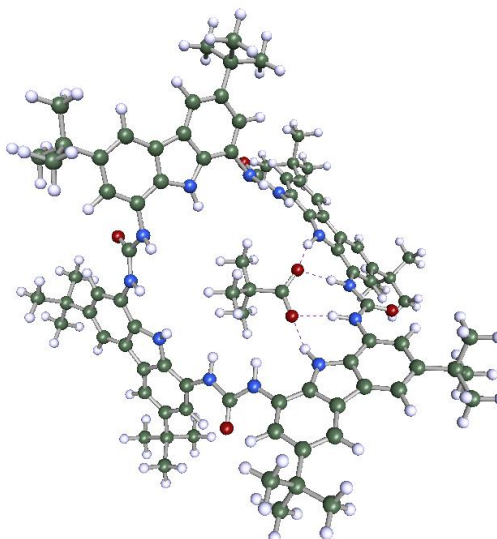

$G = -2866337.50211$  kcal/mol

Lowest energy conformation of receptor **MC002** with acetate anion

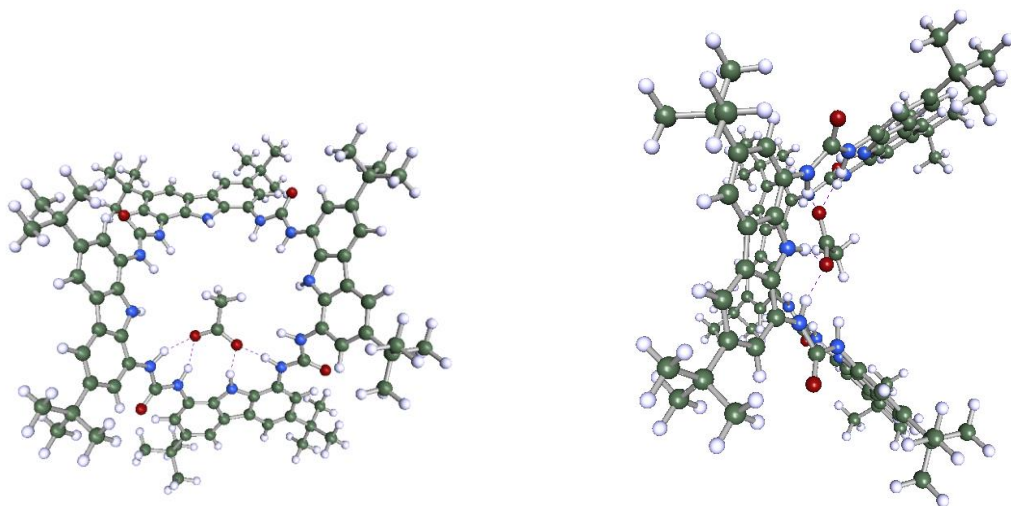

$G = -2792310.16571$  kcal/mol

Lowest energy conformation of receptor **MC002** with benzoate anion

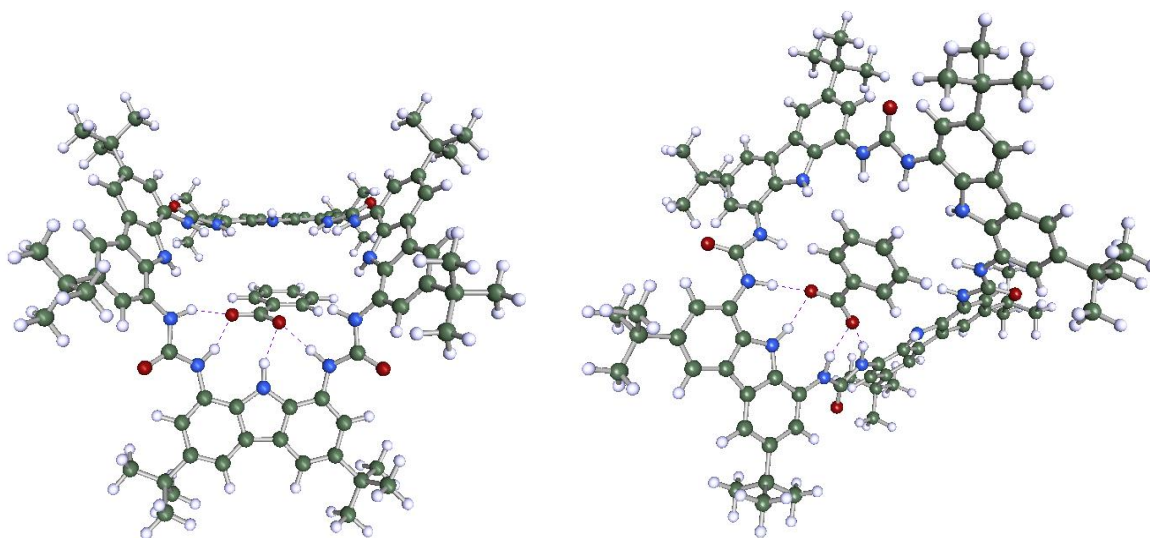

$G = -2912671.14577$  kcal/mol



Lowest energy conformation of receptor **MC002** with lactate anion

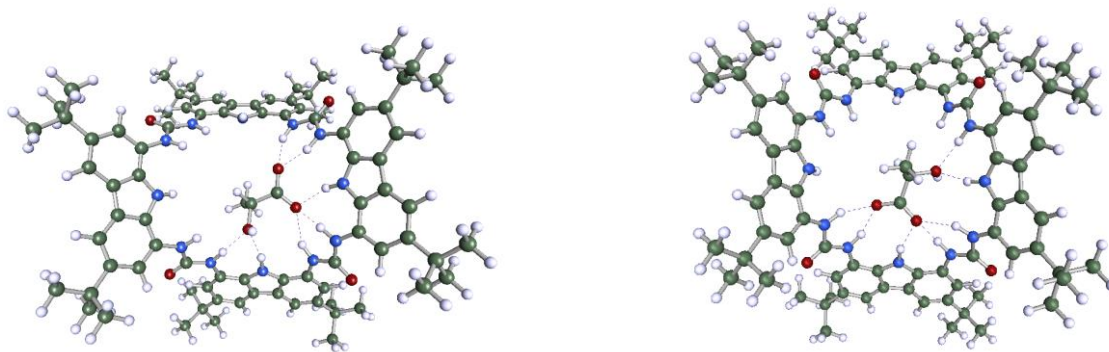

$G = -2864220.05839$  kcal/mol

Lowest energy conformation of receptor **MC002** with formate anion

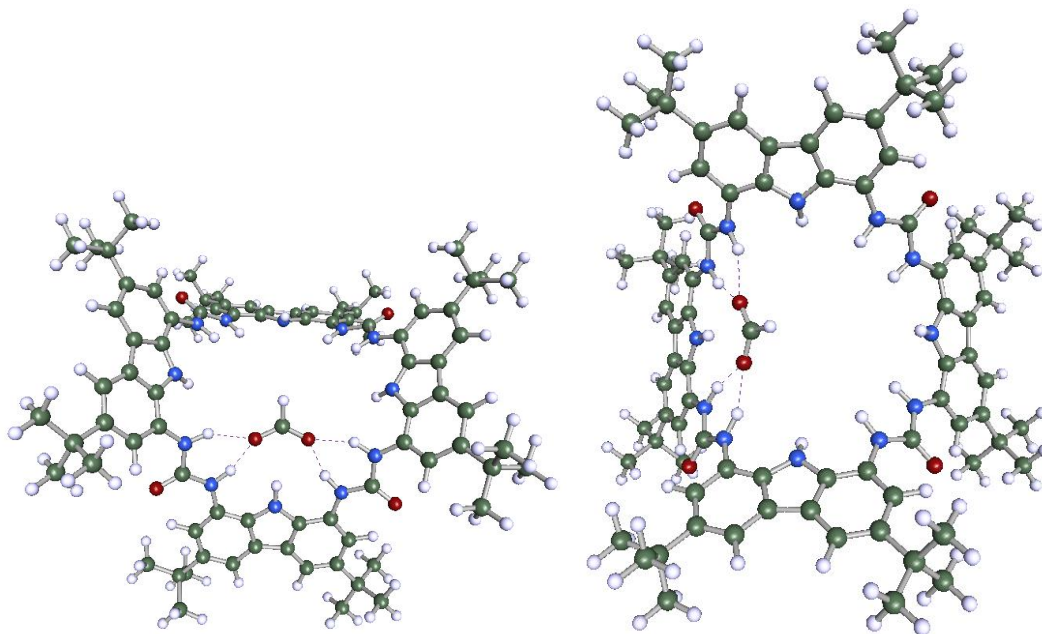

$G = -2767634.54569$  kcal/mol

Lowest energy conformation of receptor **MC003**

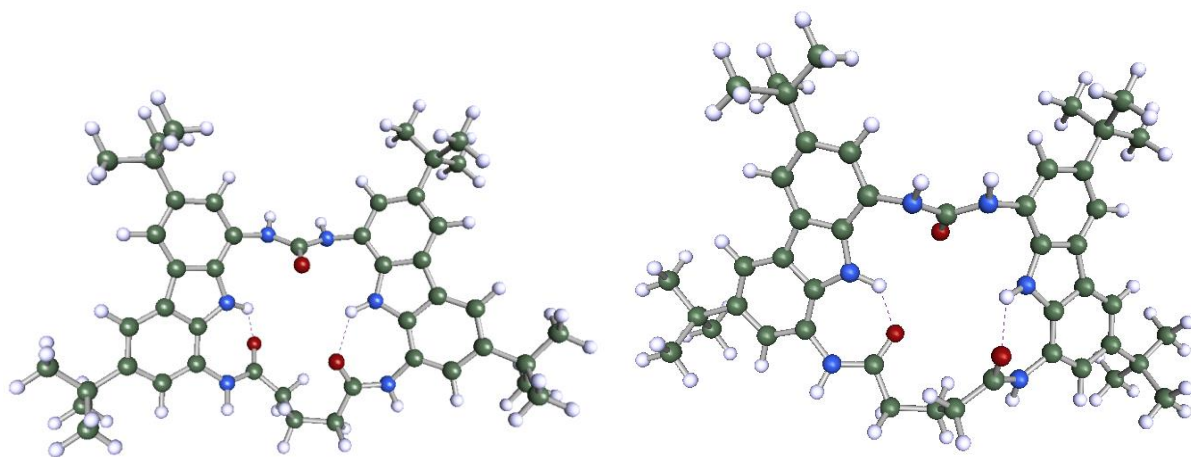

$G = -1469566.91734$  kcal/mol

Lowest energy conformation of receptor **MC003** with pivalate anion

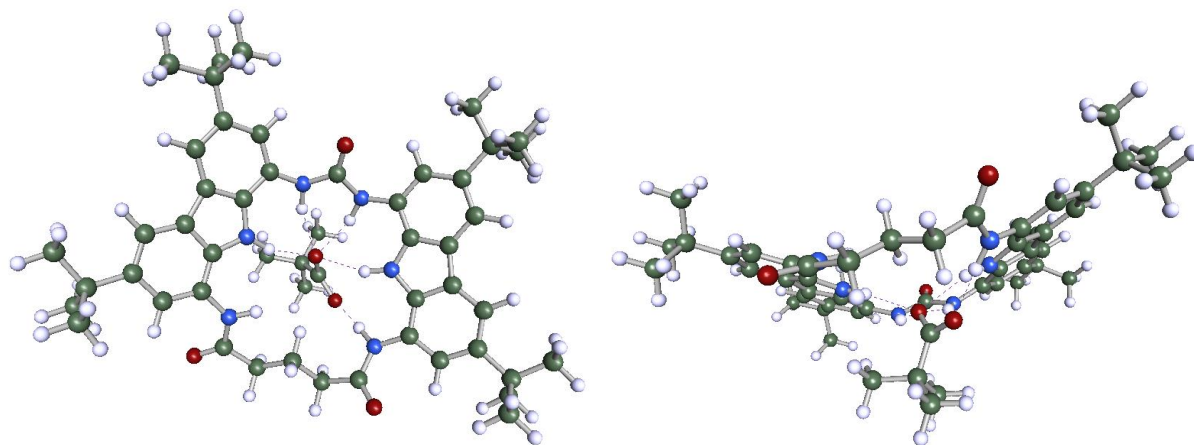

$G = -1687151.33703$  kcal/mol

Lowest energy conformation of receptor **MC003** with acetate anion

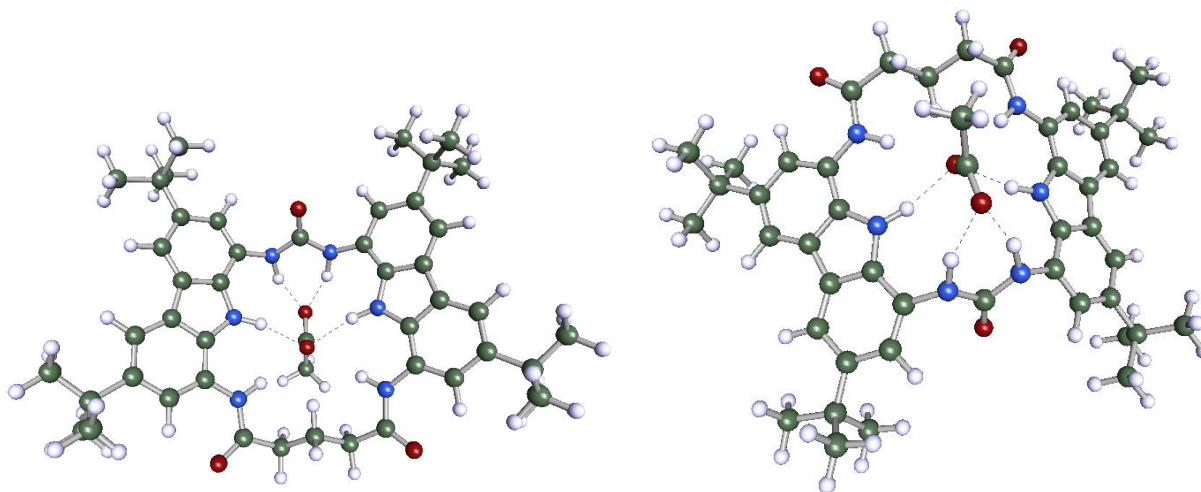

$G = -1613118.82814 \text{ kcal/mol}$

Lowest energy conformation of receptor **MC003** with benzoate anion

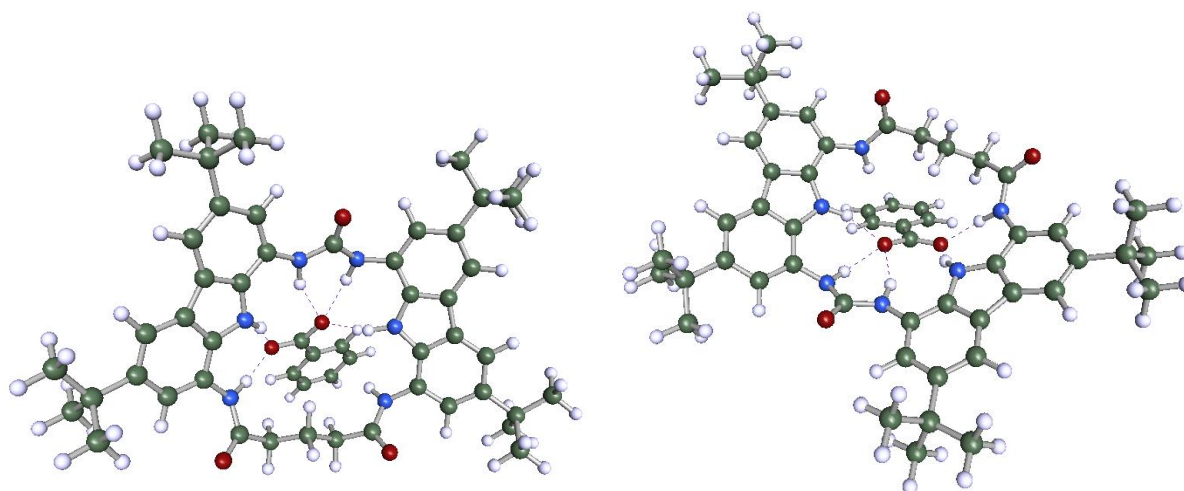

$G = -1733483.80492 \text{ kcal/mol}$



Lowest energy conformation of receptor **MC003** with lactate anion

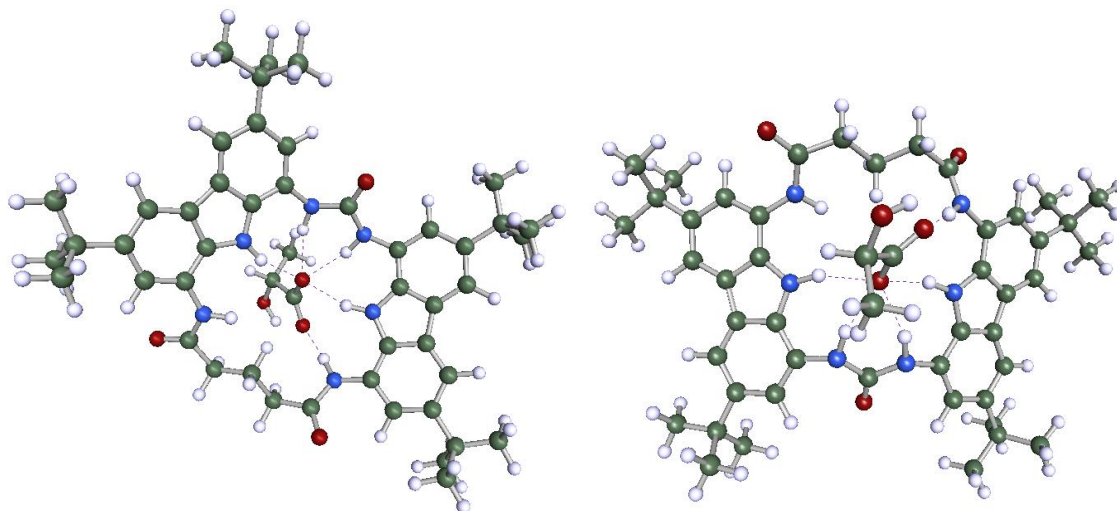

$G = -1685024.93247$  kcal/mol

Lowest energy conformation of receptor **MC003** with formate anion

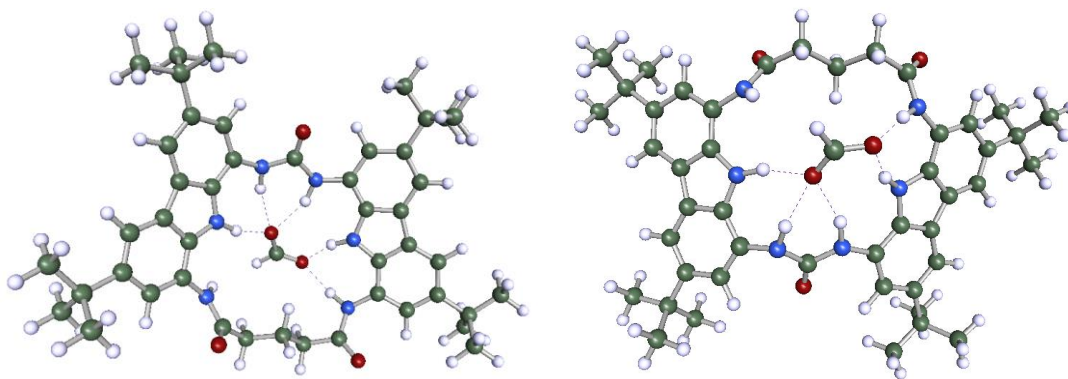

$G = -1588438.70245$  kcal/mol

Lowest energy conformation of receptor **MC004**

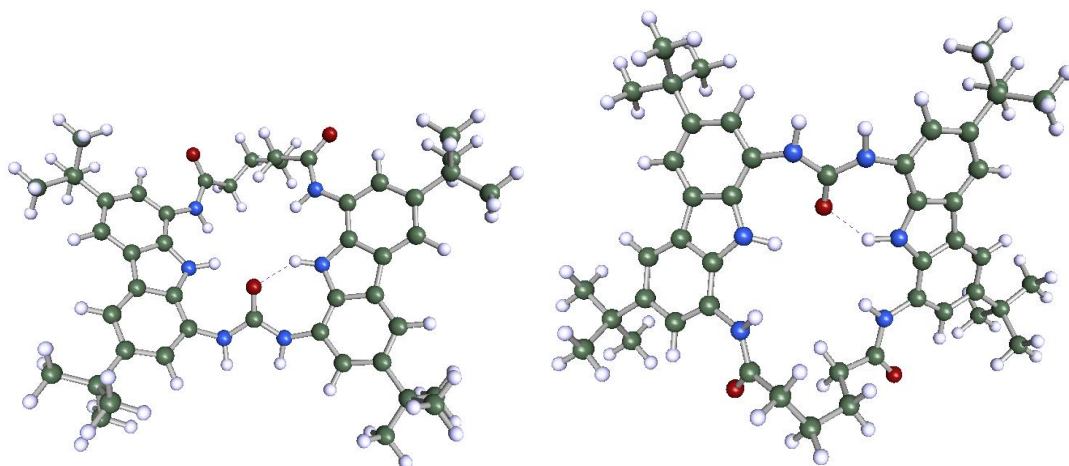

$G = -1494248.55193$  kcal/mol

Lowest energy conformation of receptor **MC004** with pivalate anion

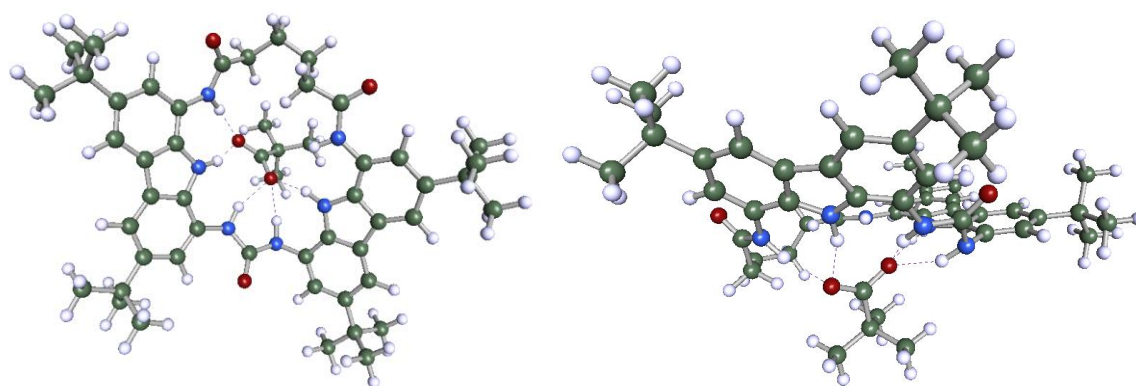

$G = -1711829.70872$  kcal/mol

Lowest energy conformation of receptor **MC004** with acetate anion

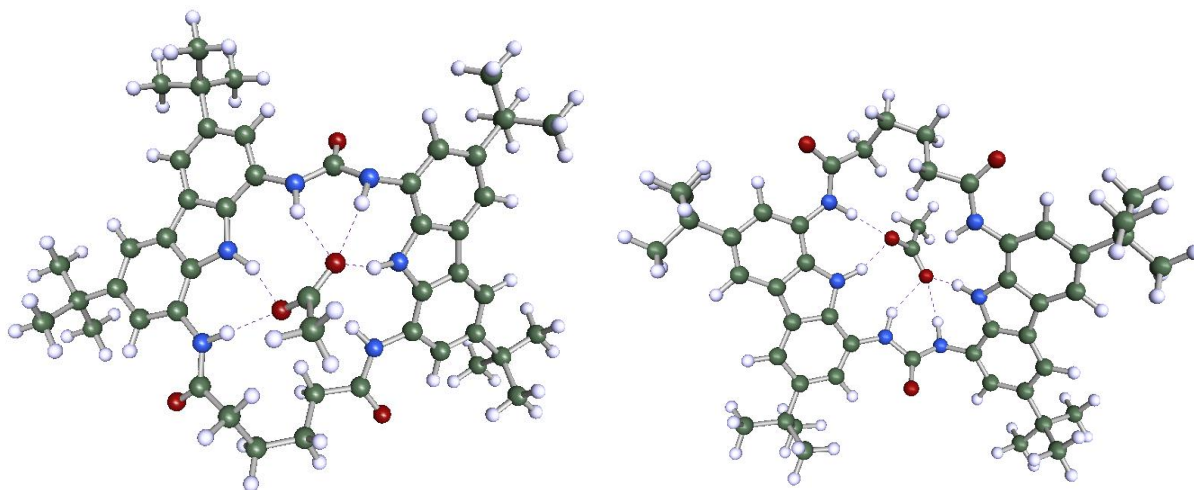

$G = -1637796.77666 \text{ kcal/mol}$

Lowest energy conformation of receptor **MC004** with benzoate anion

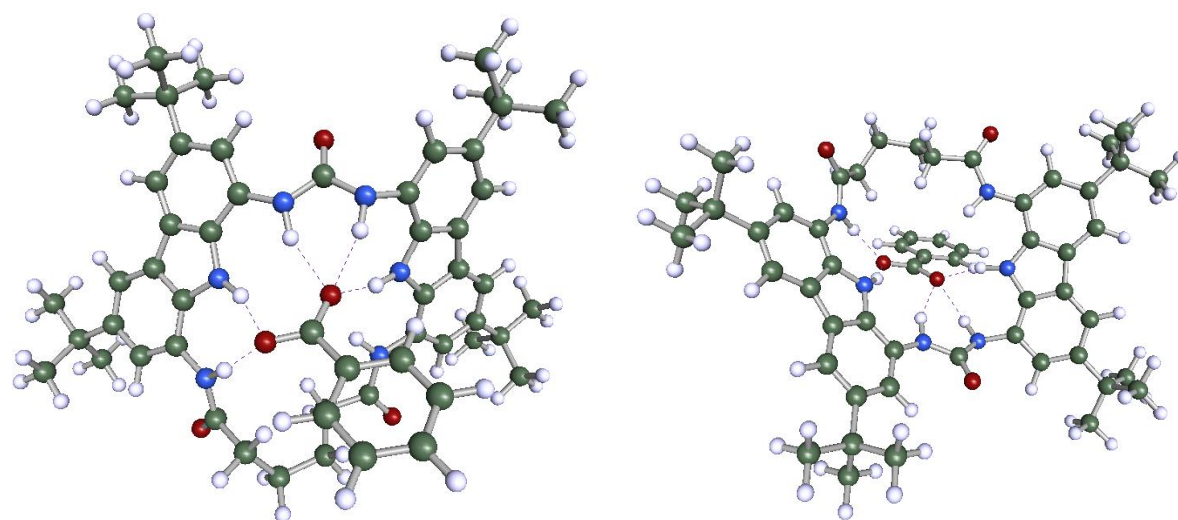

$G = -1758160.92459 \text{ kcal/mol}$

Lowest energy conformation of receptor **MC004** with lactate anion

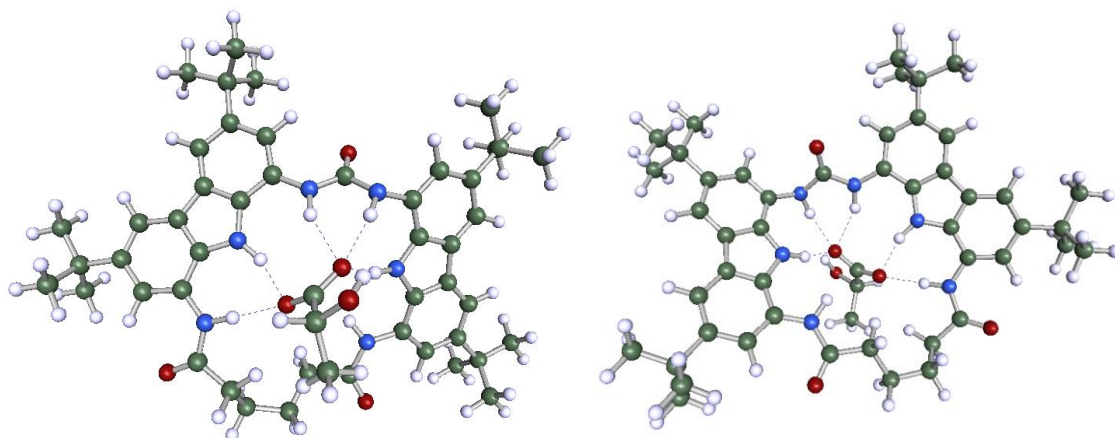

$G = -1709700.31149$  kcal/mol

Lowest energy conformation of receptor **MC004** with formate anion

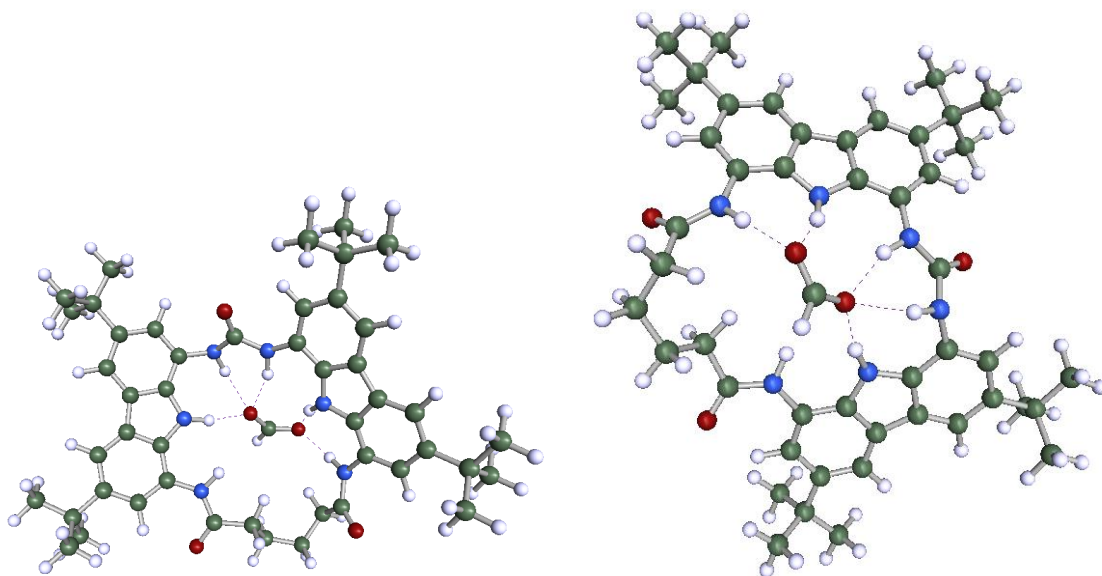

$G = -1613115.44806$  kcal/mol

Lowest energy conformation of receptor **MC005**

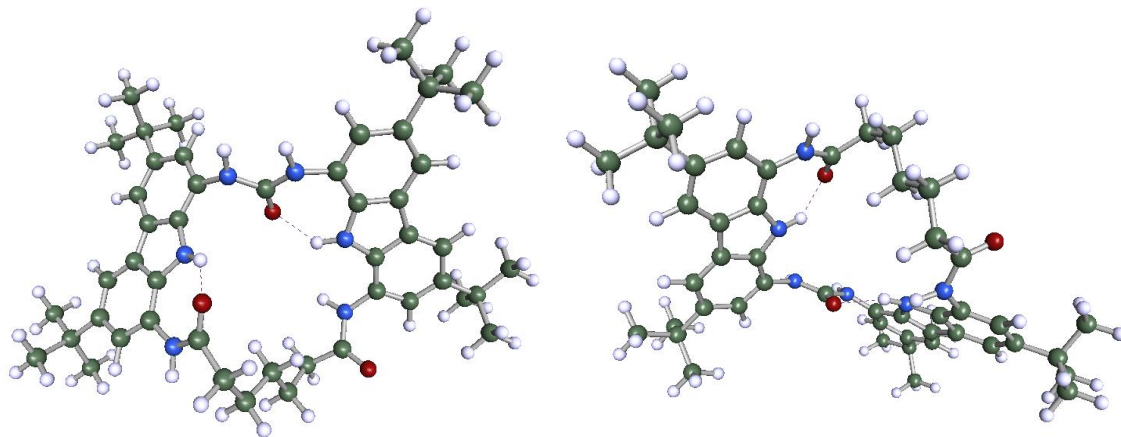

$G = -1518926.98220$  kcal/mol

Lowest energy conformation of receptor **MC005** with pivalate anion

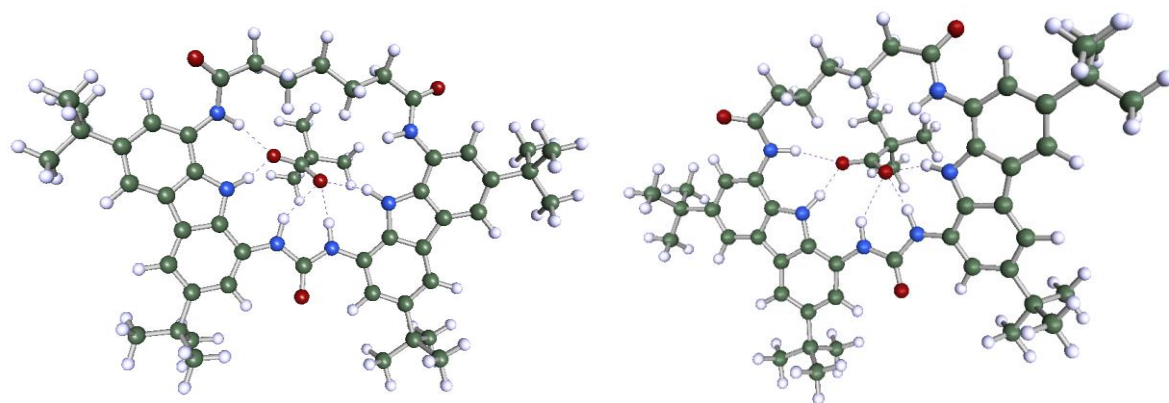

$G = -1736508.43110$  kcal/mol



Lowest energy conformation of receptor **MC005** with acetate anion

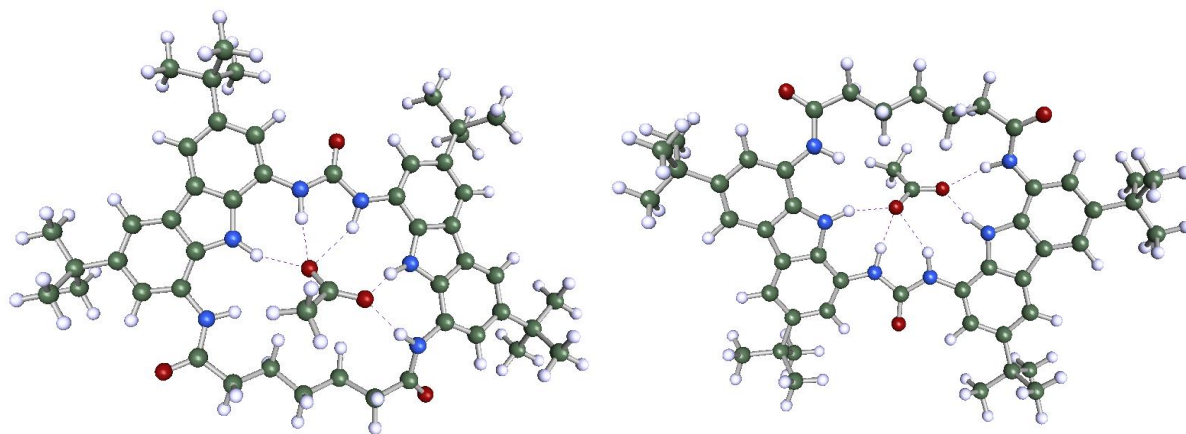

$G = -1662477.72110$  kcal/mol

Lowest energy conformation of receptor **MC005** with benzoate anion

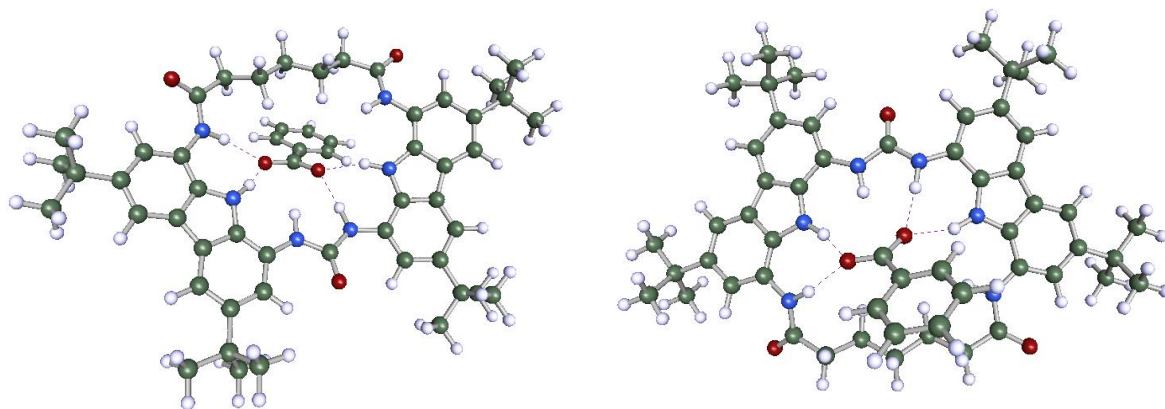

$G = -1782840.25461$  kcal/mol

Lowest energy conformation of receptor **MC005** with lactate anion

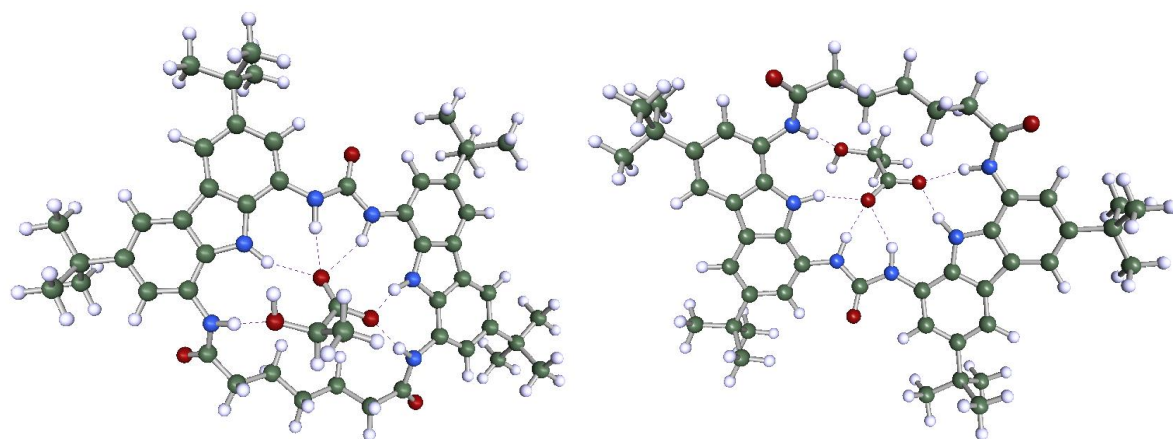

$G = -1734386.24267$  kcal/mol

Lowest energy conformation of receptor **MC005** with formate anion

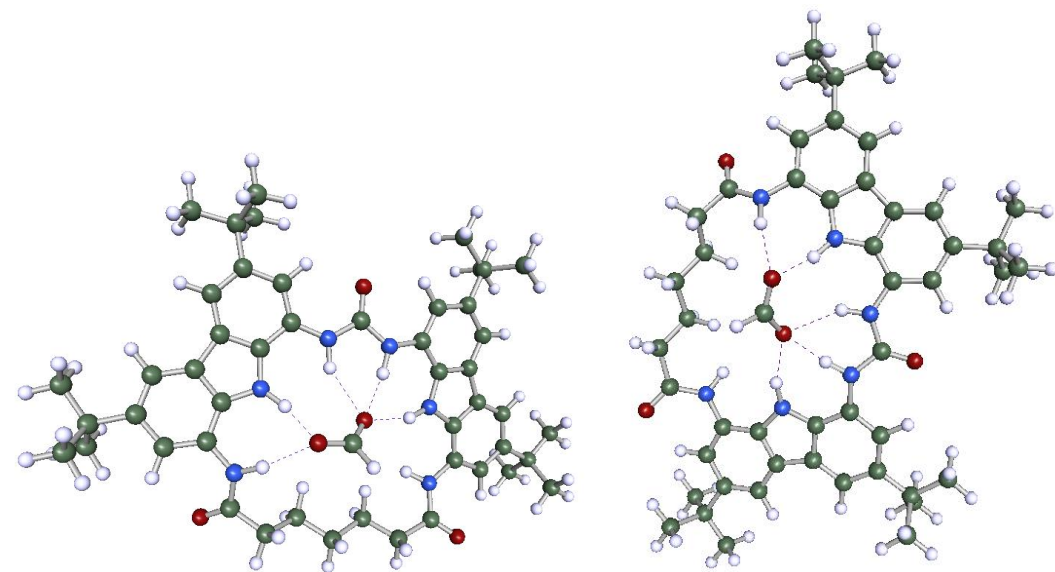

$G = -1637795.20174$  kcal/mol

Lowest energy conformation of receptor **MC006**

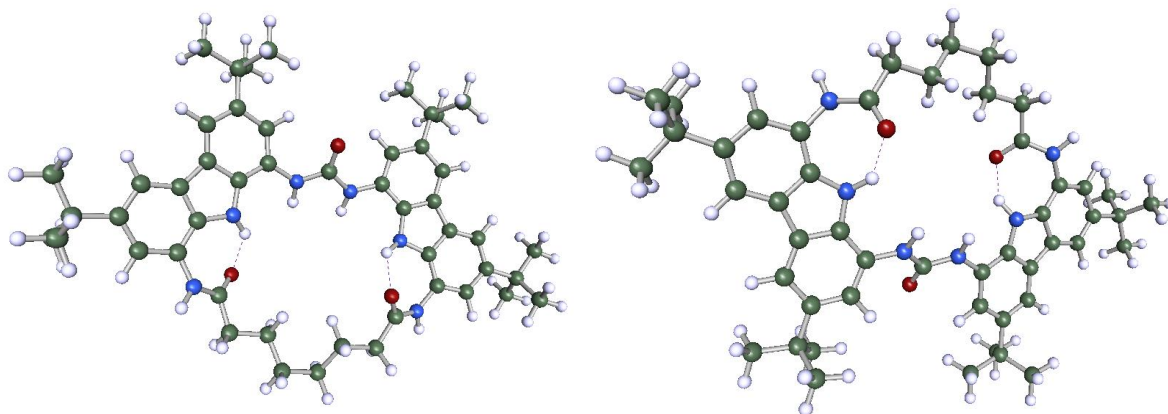

$G = -1543604.89540$  kcal/mol

Lowest energy conformation of receptor **MC006** with pivalate anion

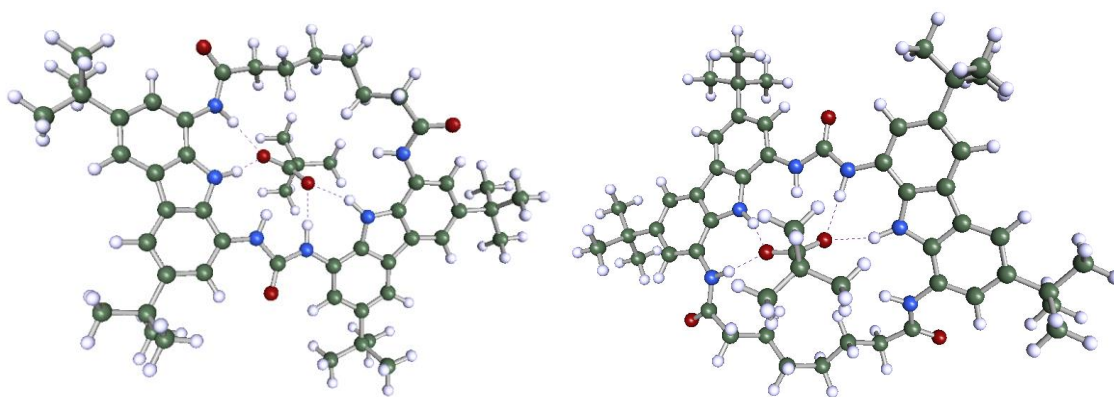

$G = -1761185.90669$  kcal/mol



Lowest energy conformation of receptor **MC006** with acetate anion

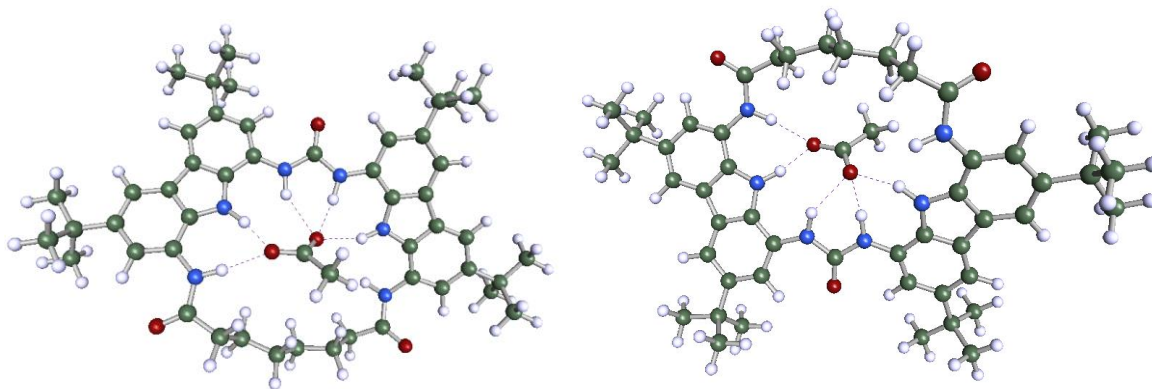

$G = -1687156.27049$  kcal/mol

Lowest energy conformation of receptor **MC006** with benzoate anion

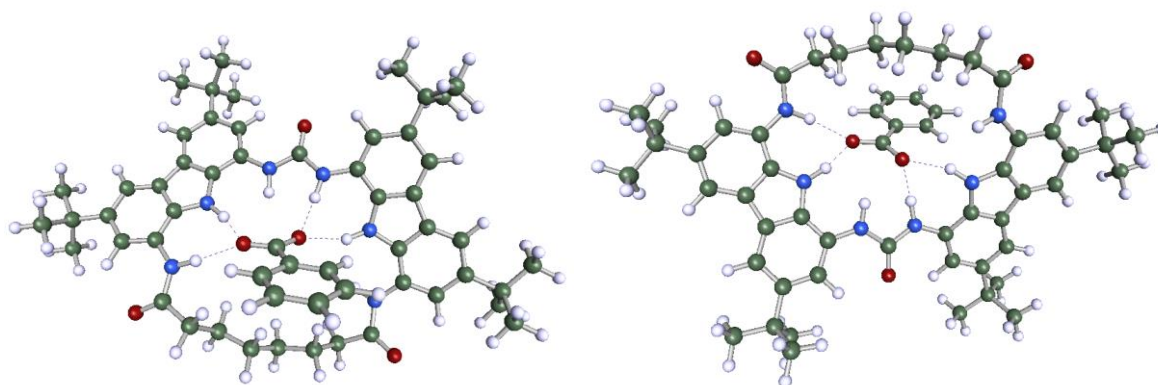

$G = -1807517.68972$  kcal/mol

Lowest energy conformation of receptor **MC006** with lactate anion

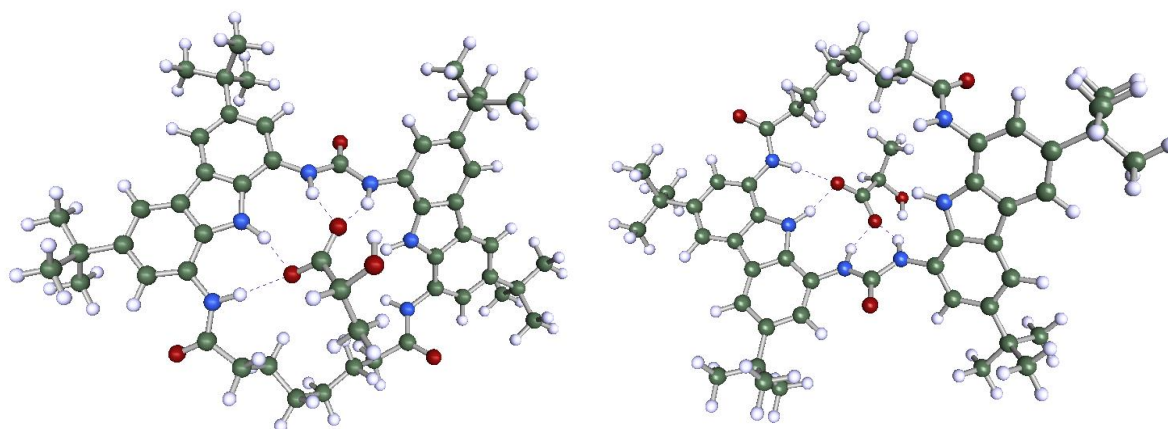

$G = -1759060.05069$  kcal/mol

Lowest energy conformation of receptor **MC006** with formate anion

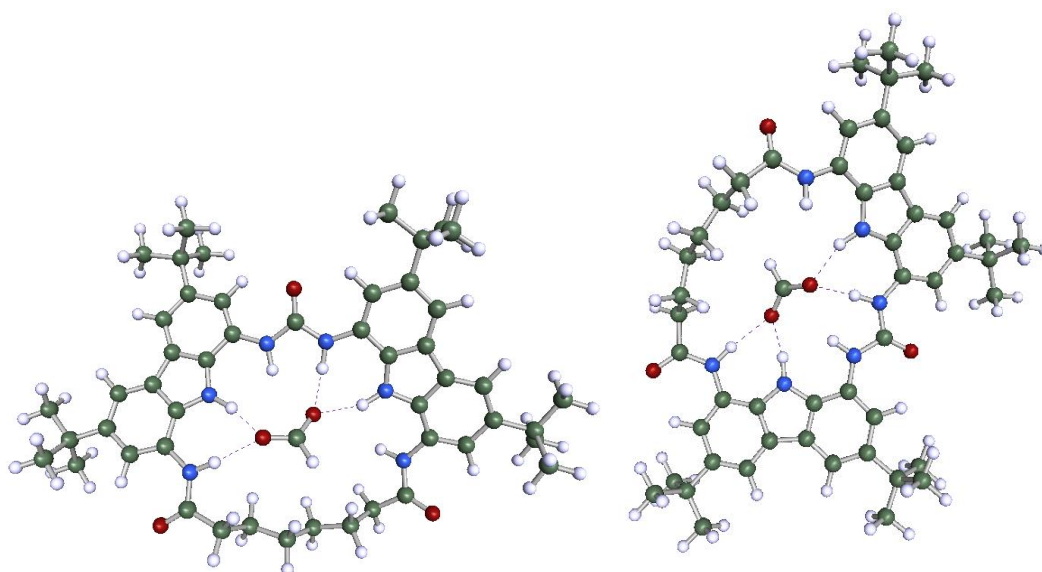

$G = -1662474.70525$  kcal/mol

Lowest energy conformation of receptor **MC007**

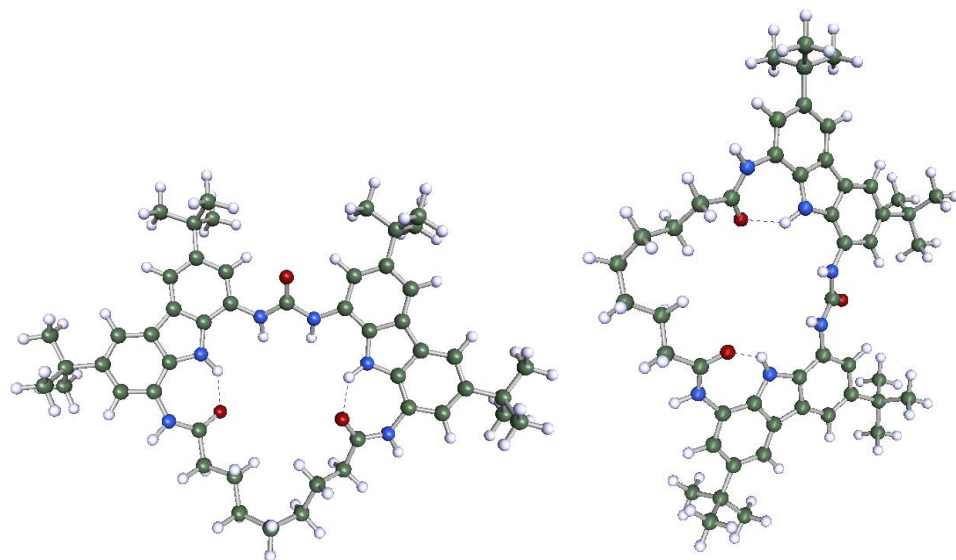

$G = -1568283.77596$  kcal/mol

Lowest energy conformation of receptor **MC007** with pivalate anion

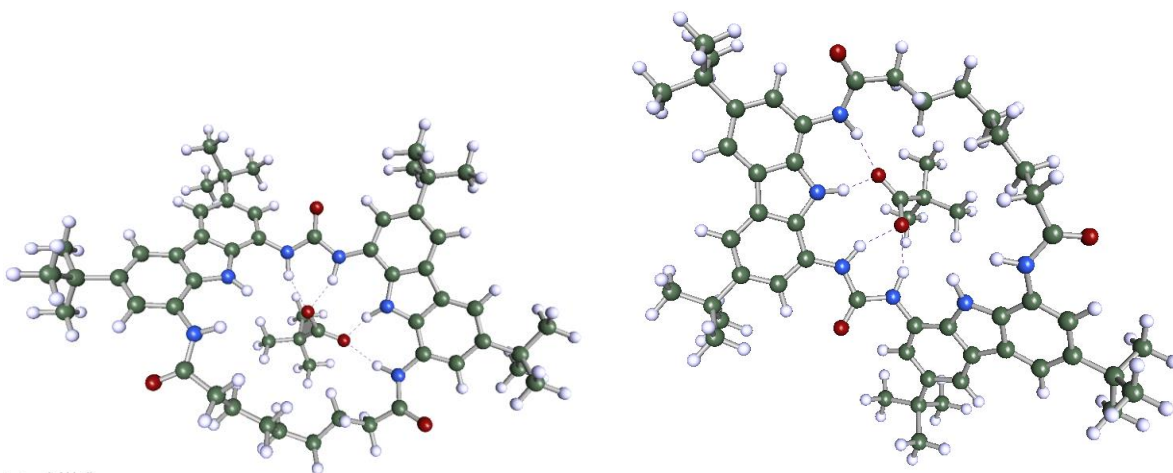

$G = -1785862.89606$  kcal/mol

Lowest energy conformation of receptor **MC007** with acetate anion

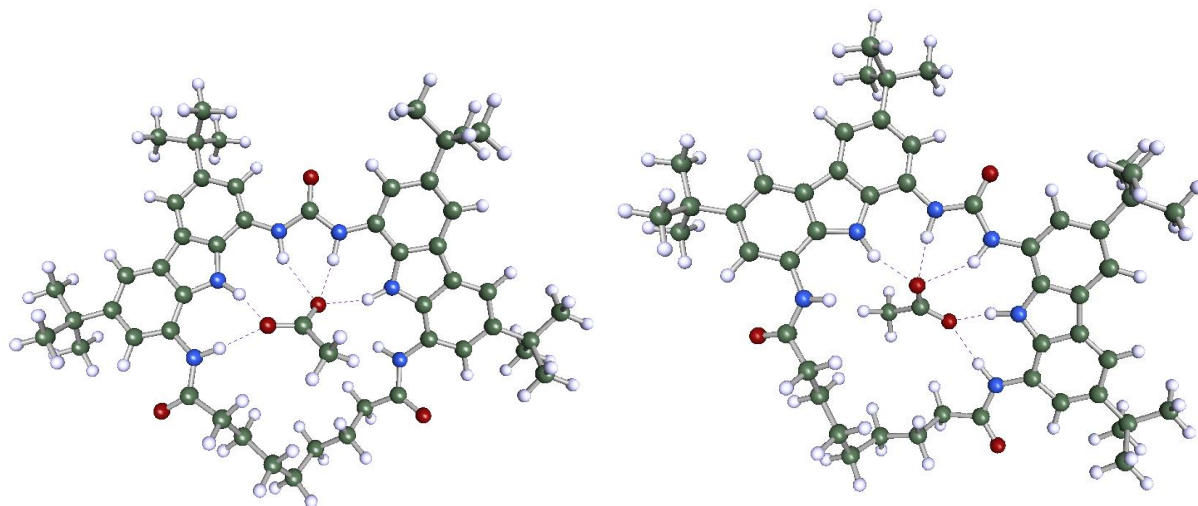

$G = -1711837.51767$  kcal/mol

Lowest energy conformation of receptor **MC007** with benzoate anion

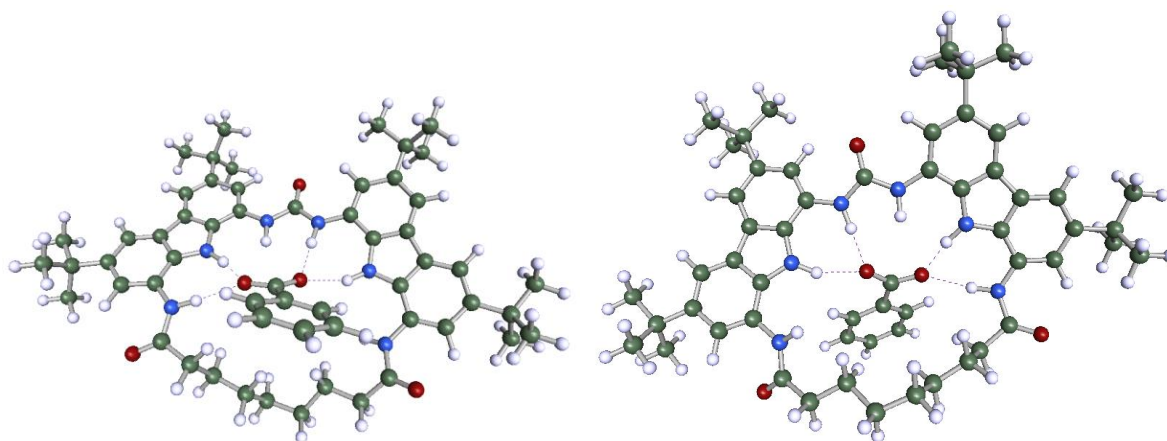

$G = -1832195.75582$  kcal/mol

Lowest energy conformation of receptor **MC007** with lactate anion

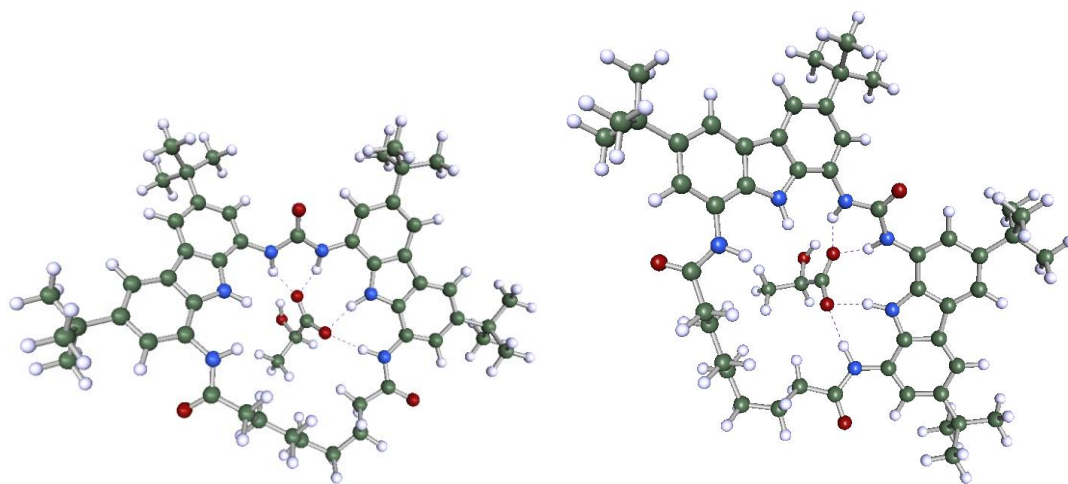

$G = -1783739.48423$  kcal/mol

Lowest energy conformation of receptor **MC007** with formate anion

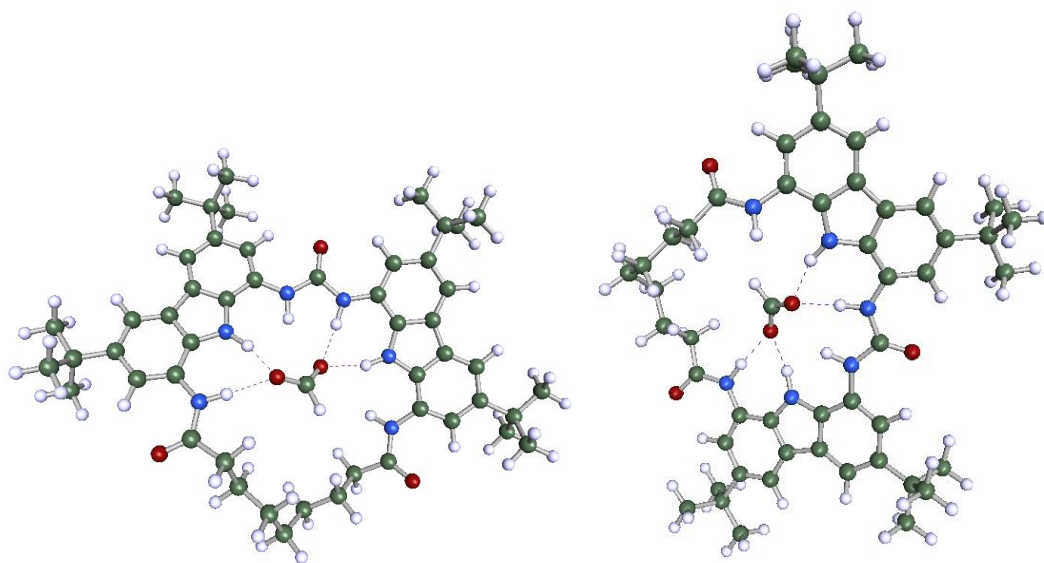

$G = -1687155.70120$  kcal/mol



Lowest energy conformation of receptor **MC008**

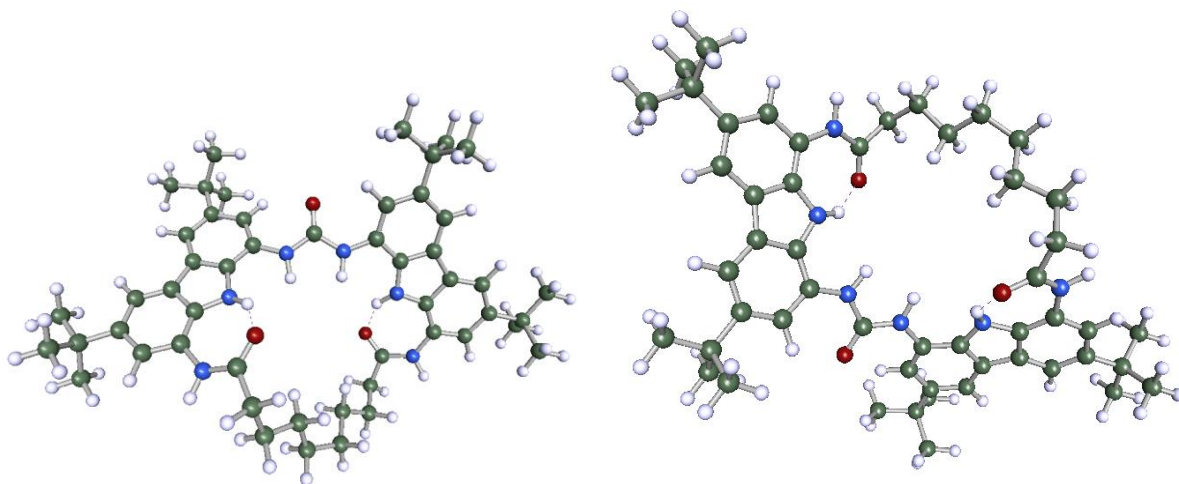

$G = -1592960.38942$  kcal/mol

Lowest energy conformation of receptor **MC008** with pivalate anion

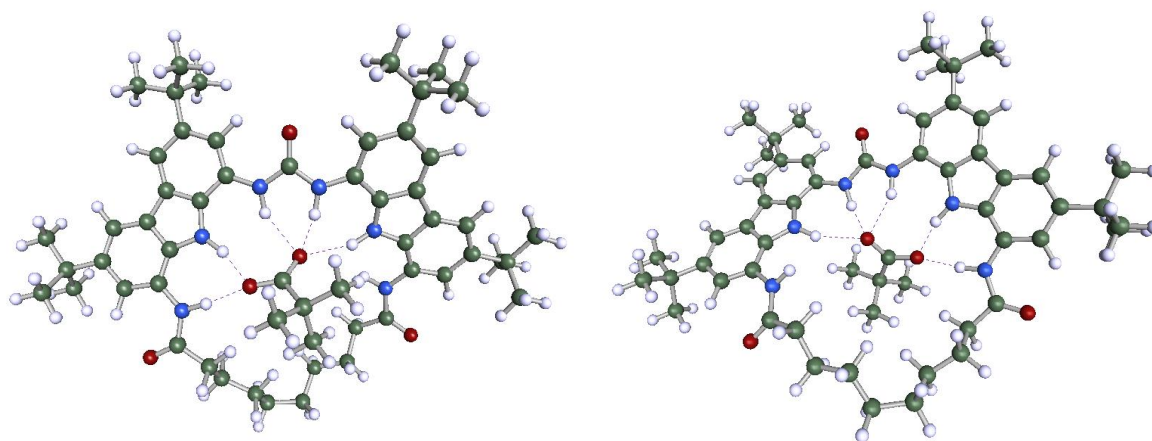

$G = -1810542.30752$  kcal/mol

Lowest energy conformation of receptor **MC008** with acetate anion

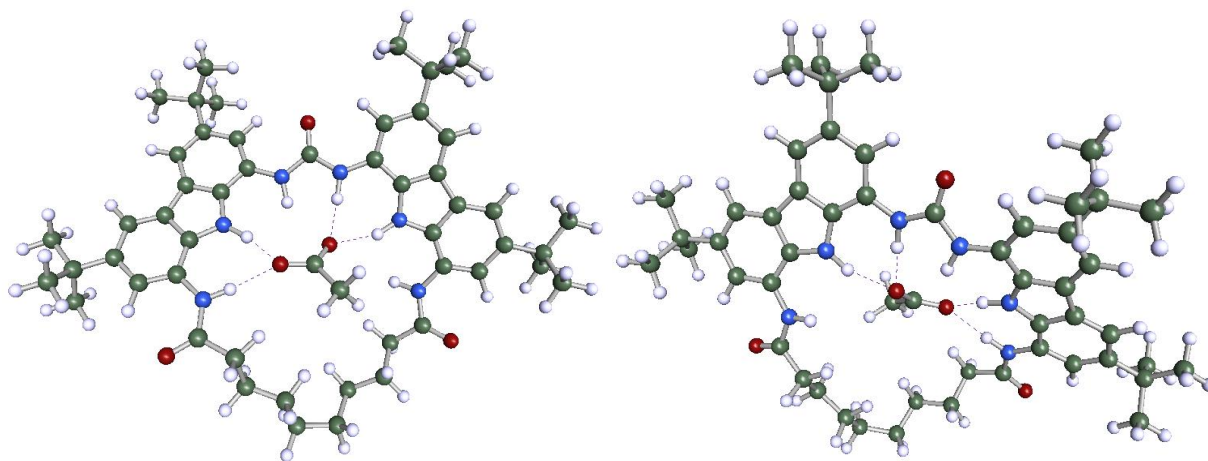

$G = -1736513.26323$  kcal/mol

Lowest energy conformation of receptor **MC008** with benzoate anion

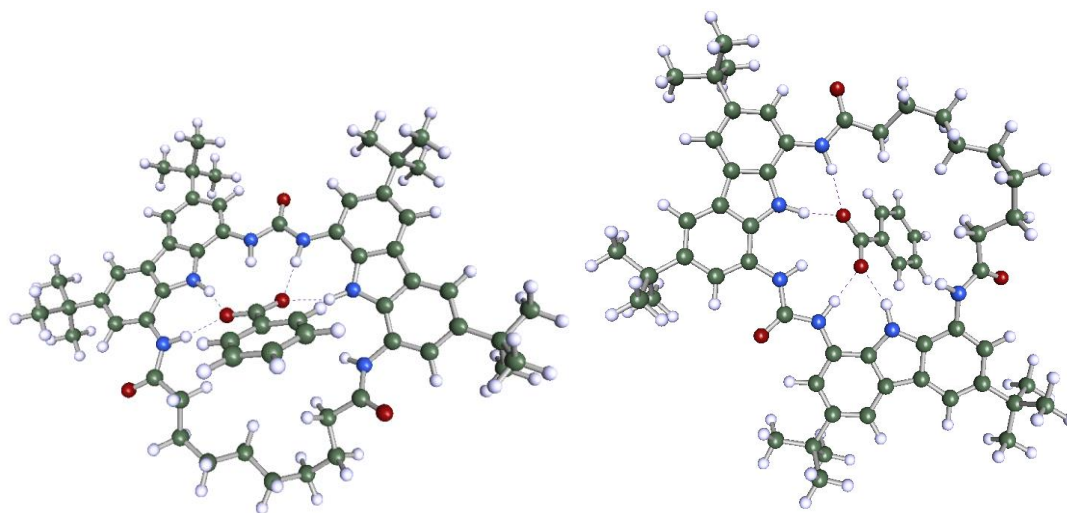

$G = -1856873.88068$  kcal/mol

Lowest energy conformation of receptor **MC008** with lactate anion

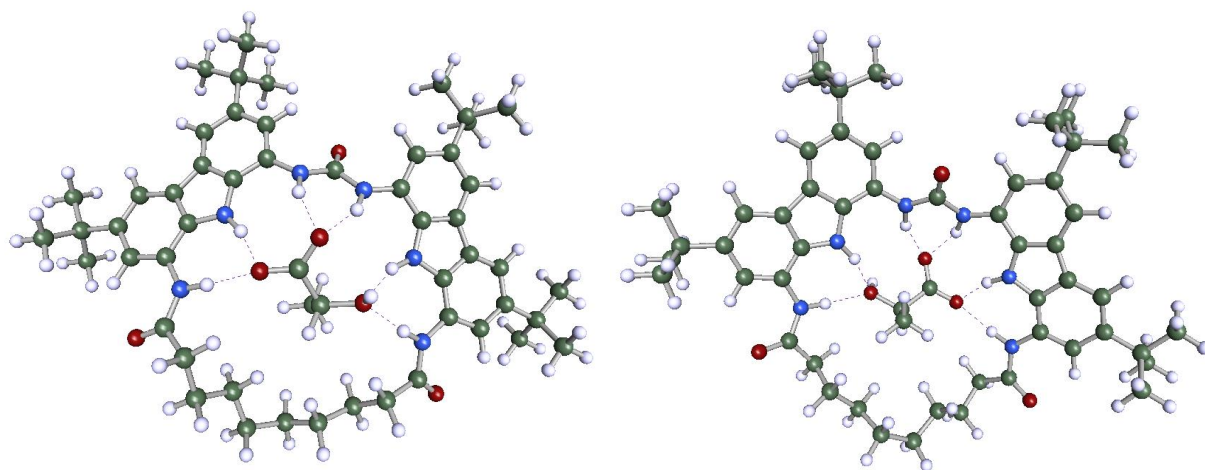

$G = -1808417.42913$  kcal/mol

Lowest energy conformation of receptor **MC008** with formate anion

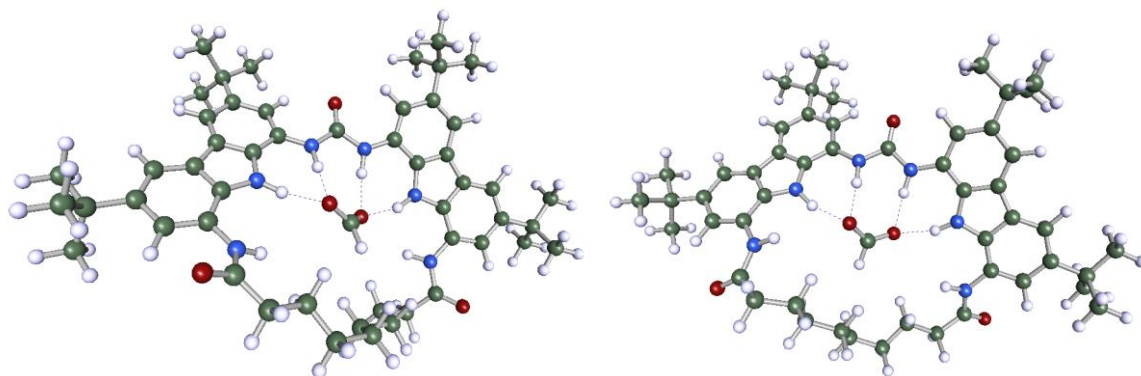

$G = -1711828.05606$  kcal/mol



Lowest energy conformation of receptor **MC009**

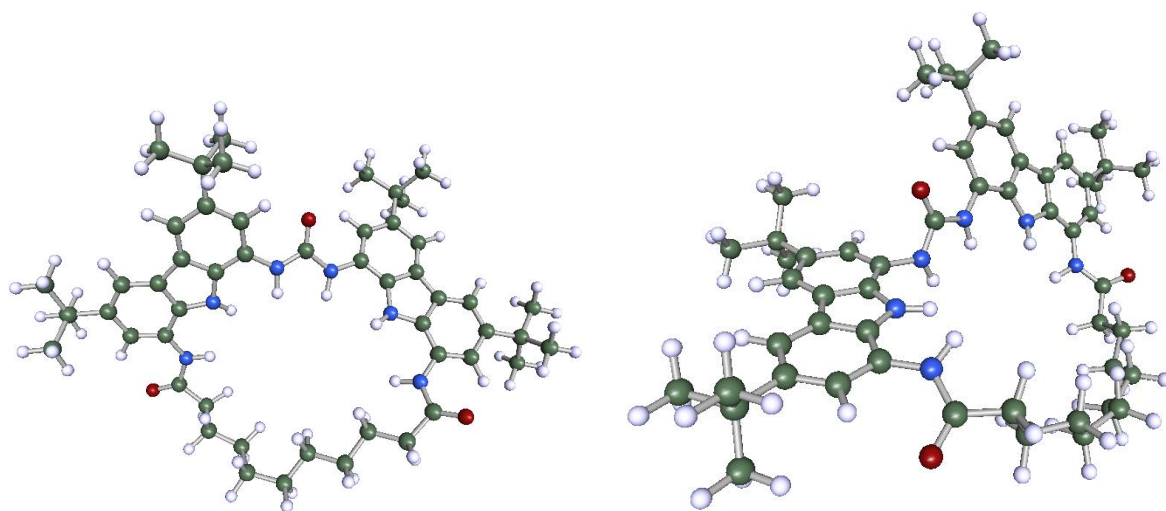

$G = -1617636.36547$  kcal/mol

Lowest energy conformation of receptor **MC009** with pivalate anion

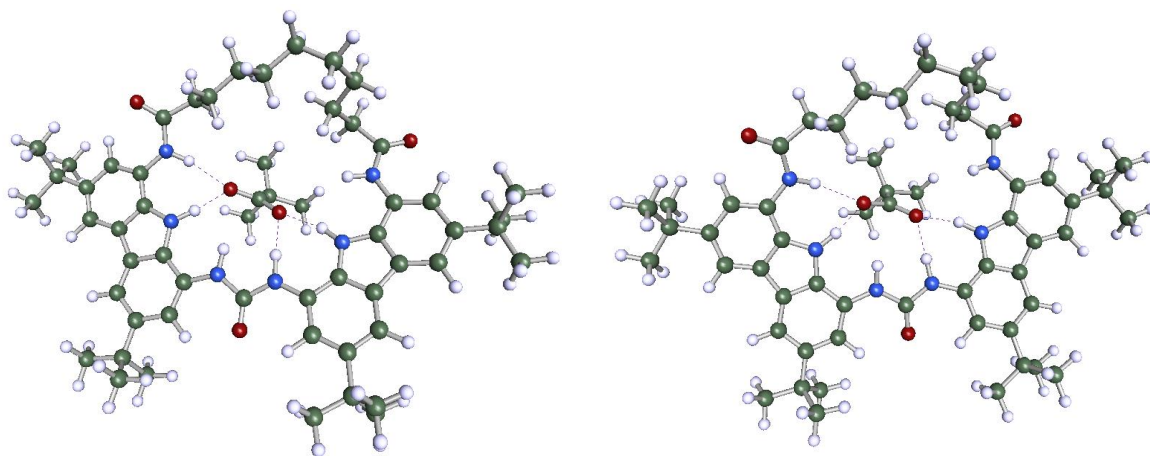

$G = -1835214.67834$  kcal/mol

Lowest energy conformation of receptor **MC009** with acetate anion

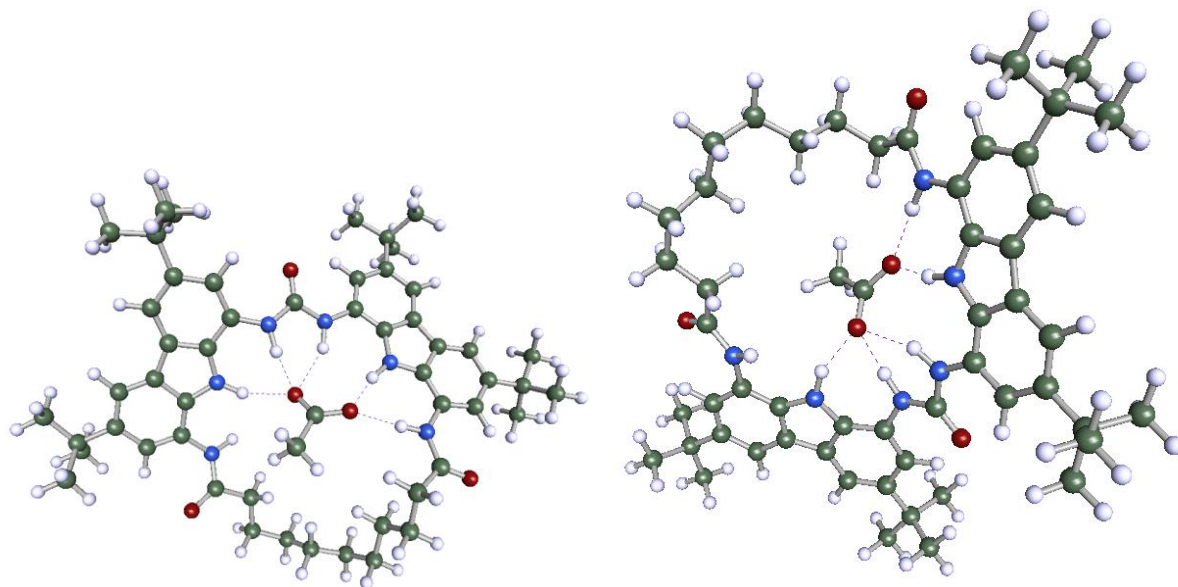

$G = -1761192.93428$  kcal/mol

Lowest energy conformation of receptor **MC009** with benzoate anion

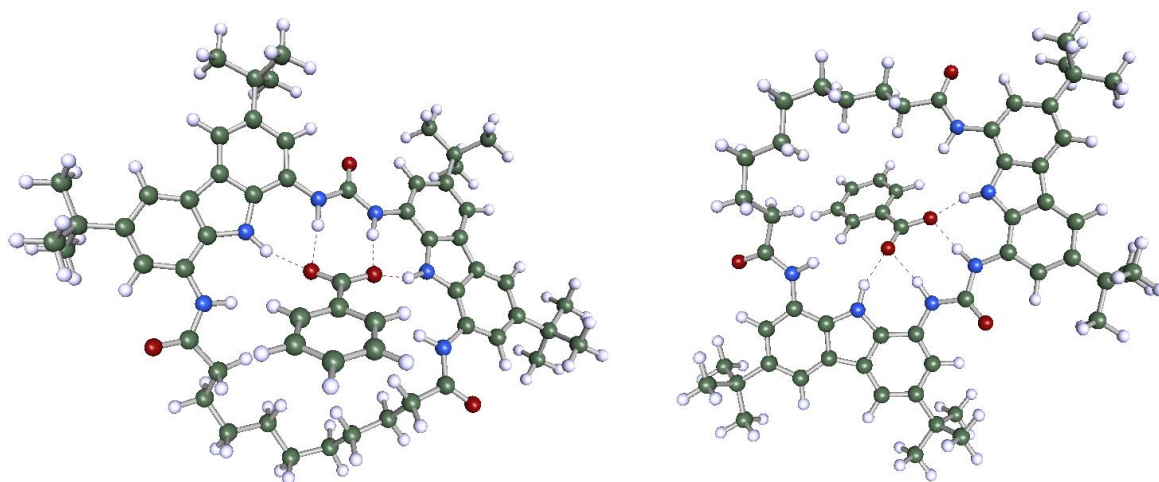

$G = -1881553.39445$  kcal/mol

Lowest energy conformation of receptor **MC009** with lactate anion

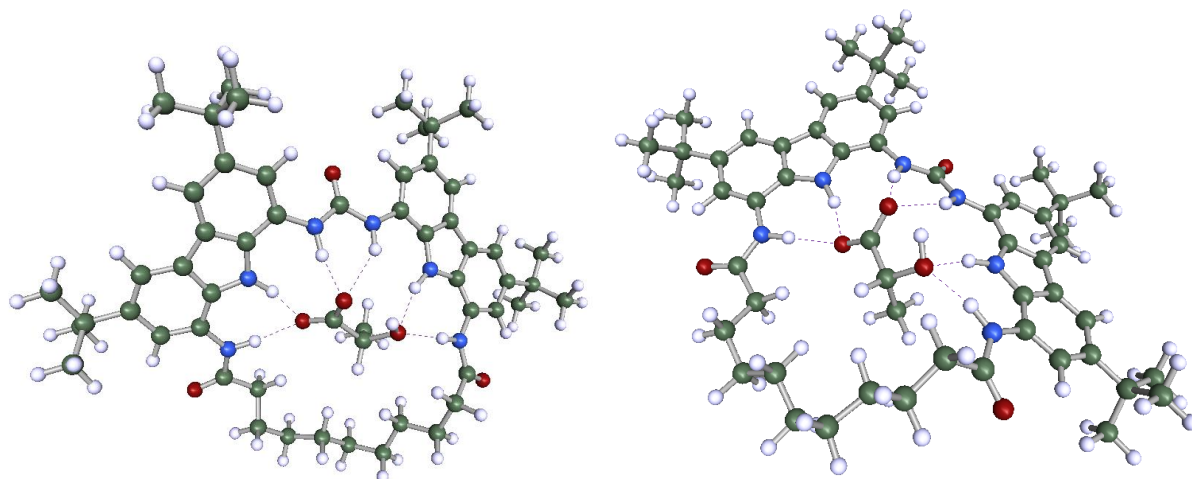

$G = -1833097.81583$  kcal/mol

Lowest energy conformation of receptor **MC009** with formate anion

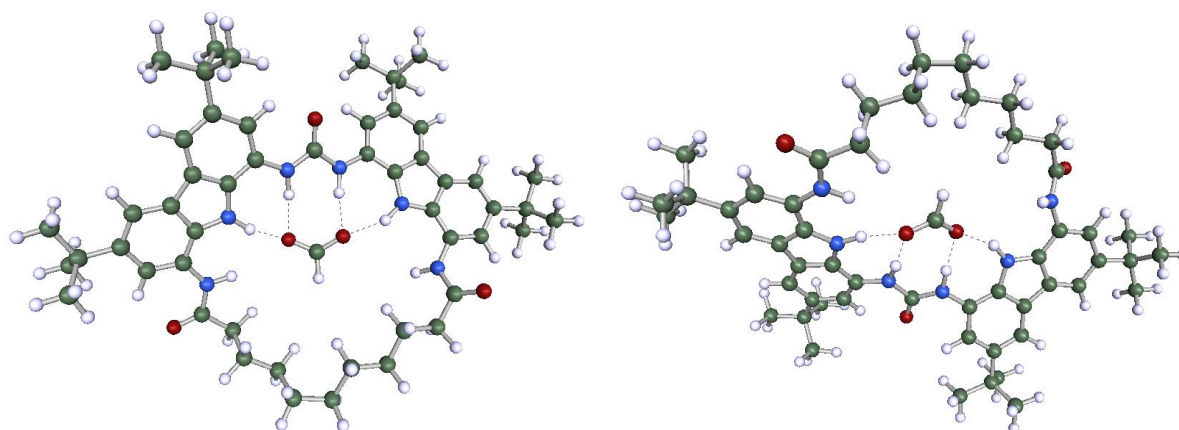

$G = -1736506.44416$  kcal/mol

Lowest energy conformation of receptor **MC010**

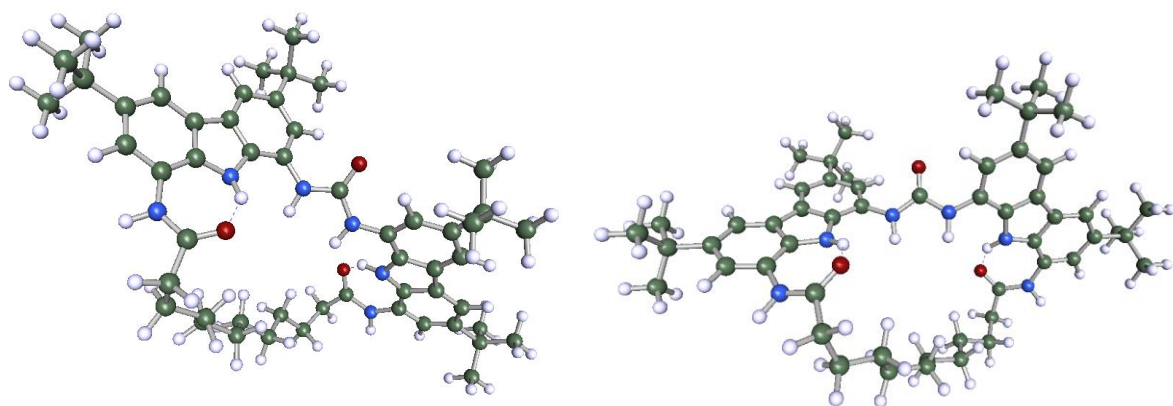

$G = -1642313.24091$  kcal/mol

Lowest energy conformation of receptor **MC010** with pivalate anion

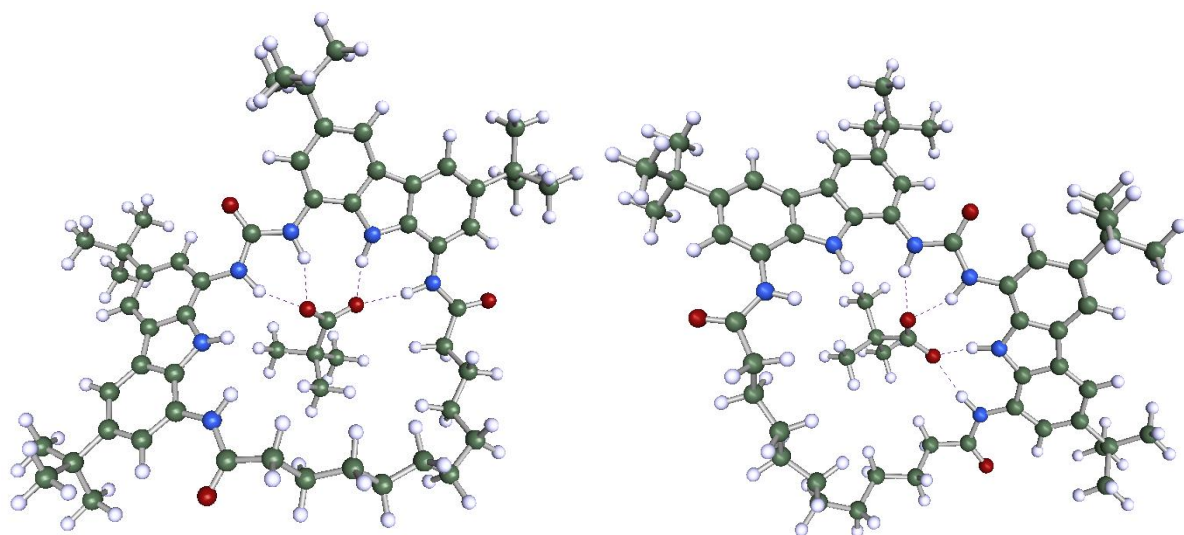

$G = -1859899.36917$  kcal/mol

Lowest energy conformation of receptor **MC010** with acetate anion

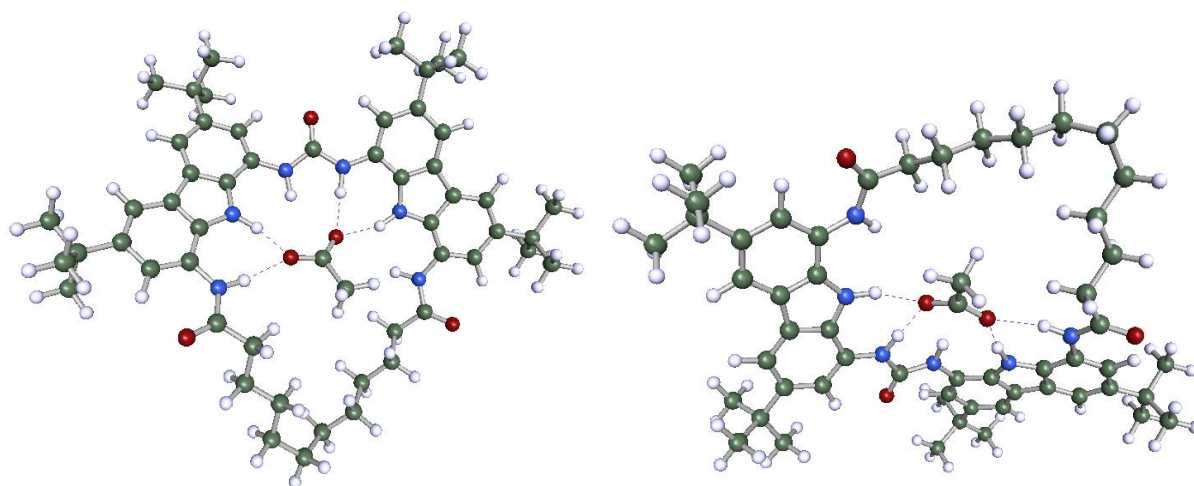

$G = -1785869.40606$  kcal/mol

Lowest energy conformation of receptor **MC010** with benzoate anion

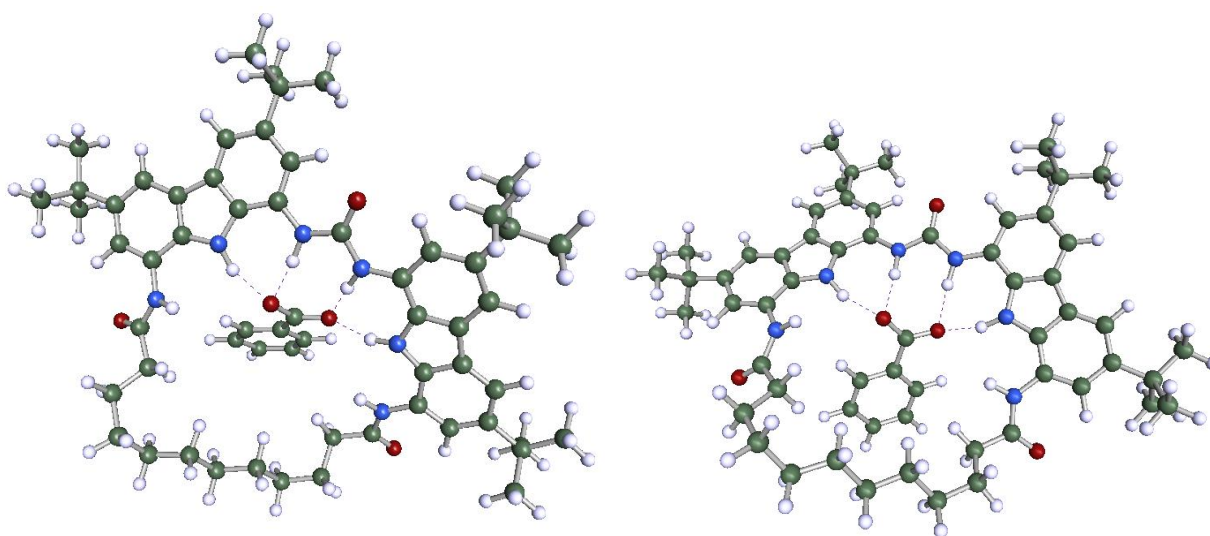

$G = -1906229.24005$  kcal/mol



Lowest energy conformation of receptor **MC010** with lactate anion

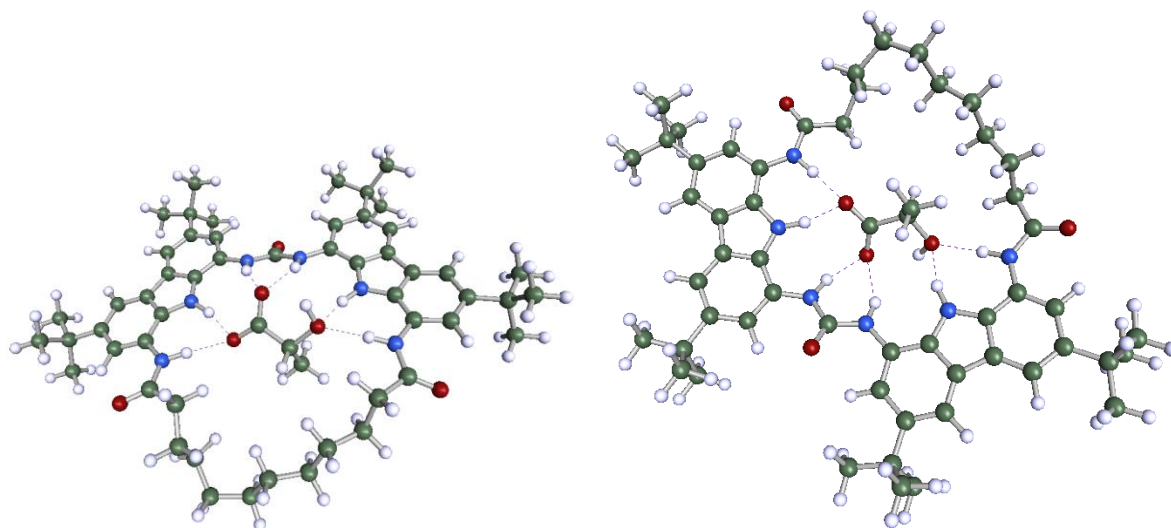

$G = -1857774.74552$  kcal/mol

Lowest energy conformation of receptor **MC010** with formate anion

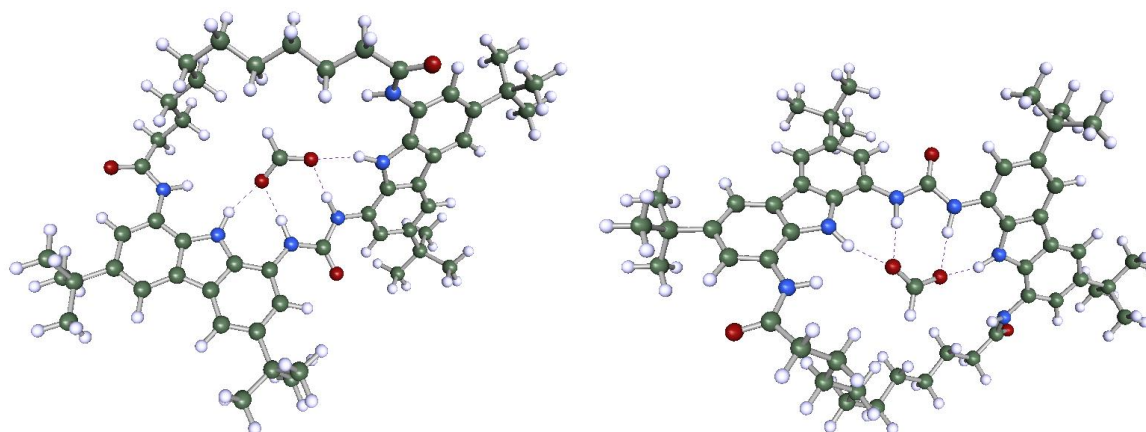

$G = -1761183.57068$  kcal/mol

Lowest energy conformation of receptor **MC011**

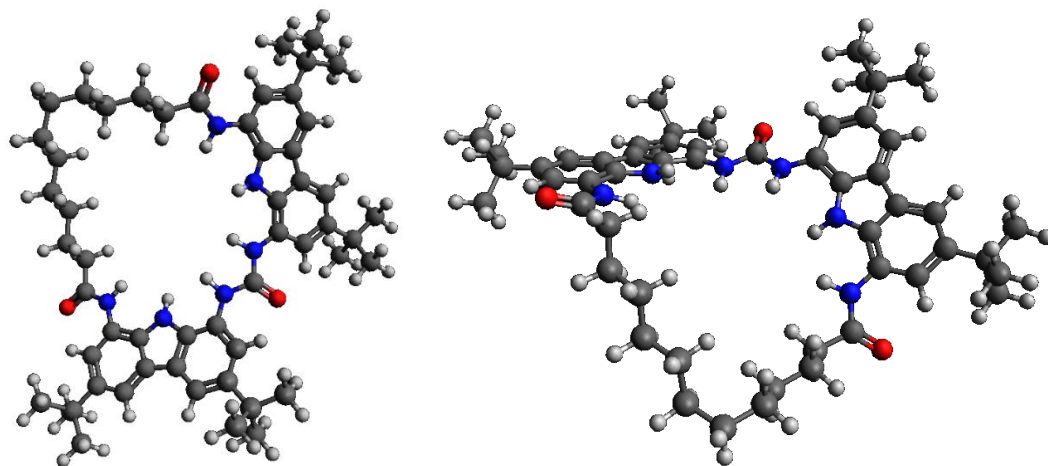

$G = -1666995.75494$  kcal/mol

Lowest energy conformation of receptor **MC011** with pivalate anion

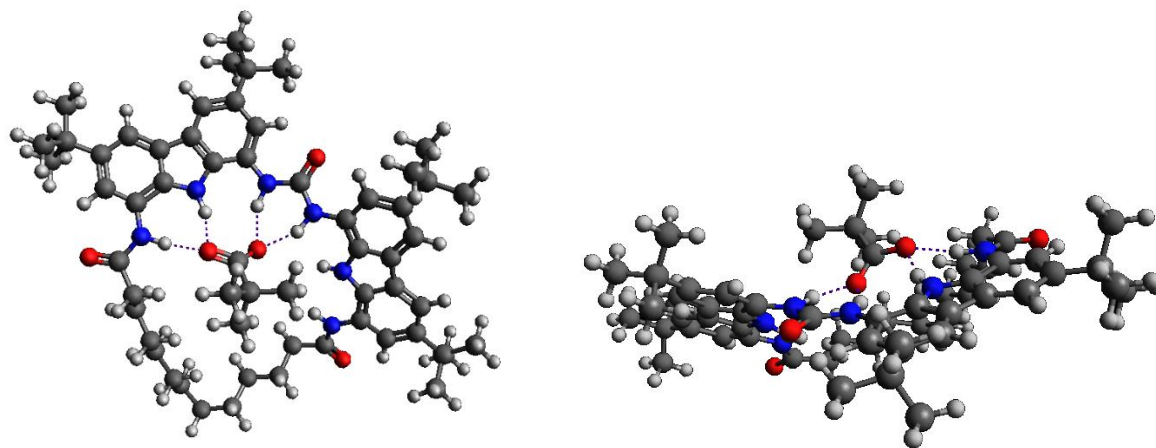

$G = -11884578.42968$  kcal/mol

Lowest energy conformation of receptor **MC011** with acetate anion

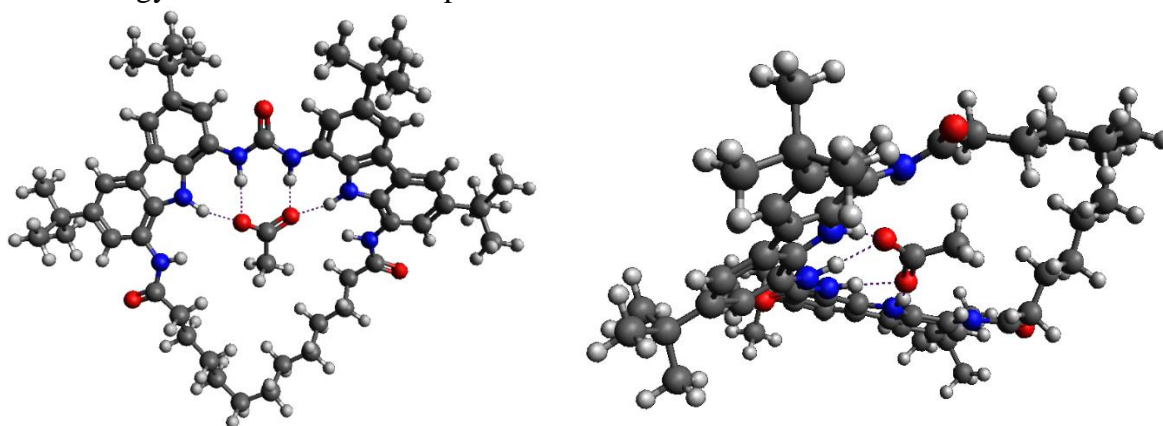

$G = -1810547.72110$  kcal/mol

Lowest energy conformation of receptor **MC011** with benzoate anion

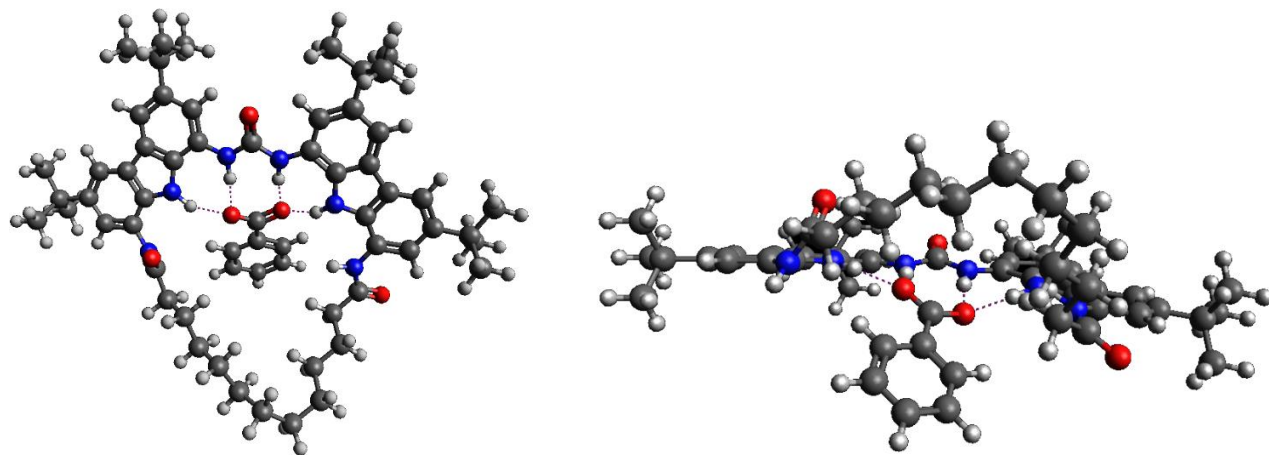

$G = -1930905.78073$  kcal/mol

Lowest energy conformation of receptor **MC011** with lactate anion

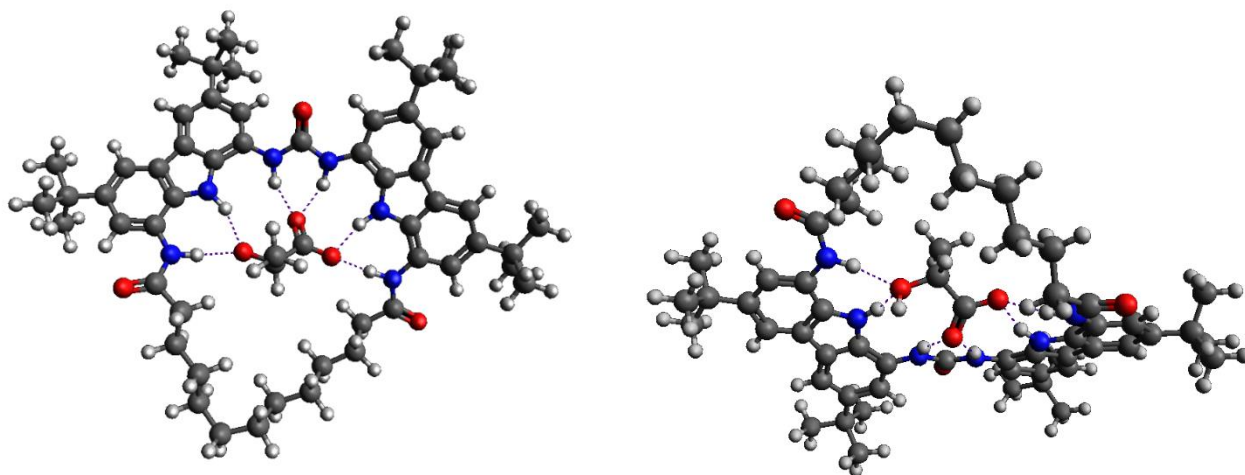

$G = -1882455.59817$  kcal/mol

Lowest energy conformation of receptor **MC011** with formate anion

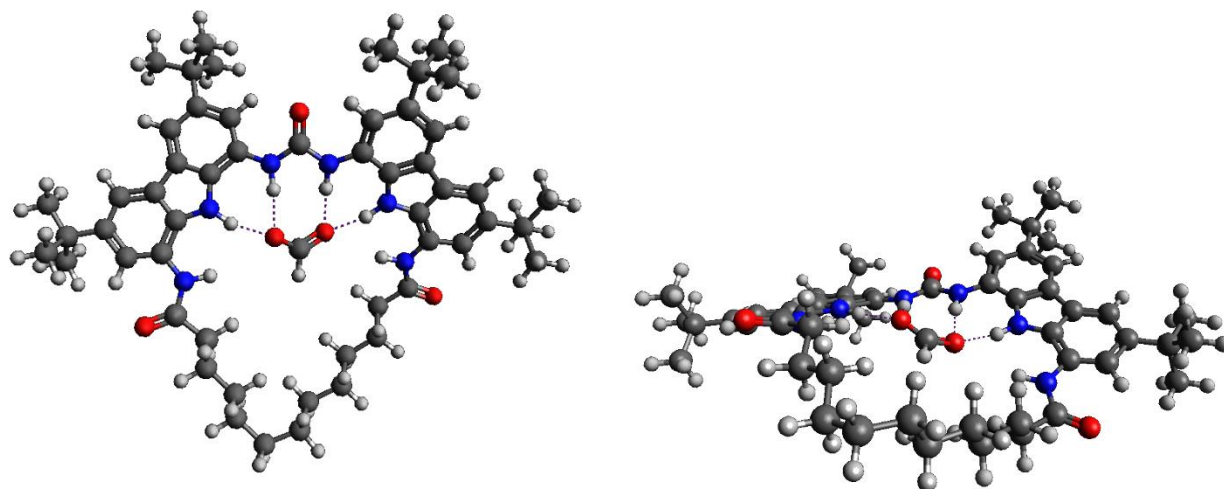

$G = -1785865.82166$  kcal/mol



Lowest energy conformation of receptor **MC012**

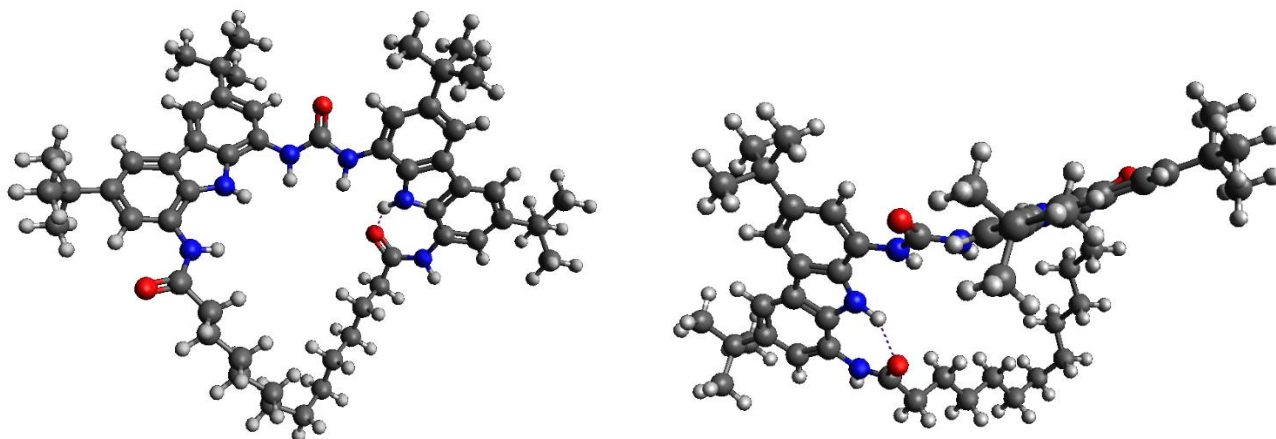

$G = -1691674.08605$  kcal/mol

Lowest energy conformation of receptor **MC012** with pivalate anion

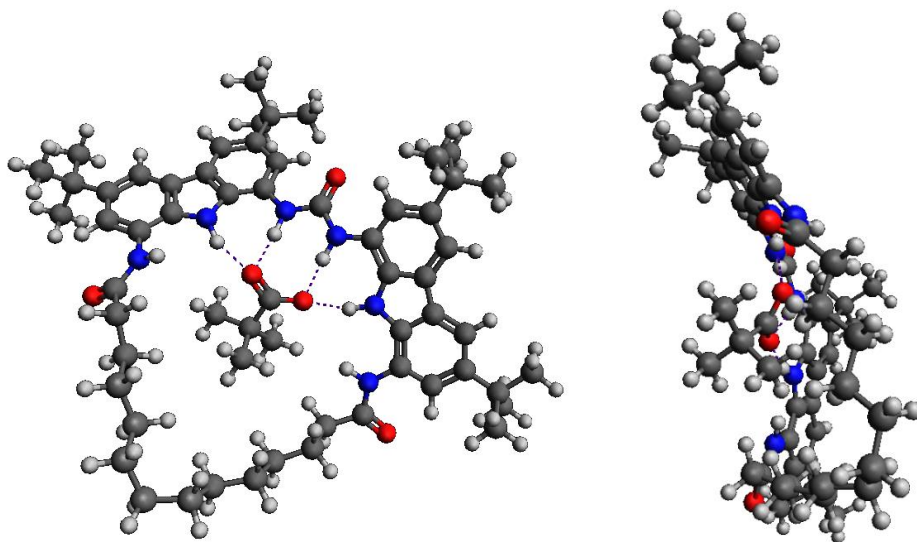

$G = -1909252.26264$  kcal/mol

Lowest energy conformation of receptor **MC012** with acetate anion

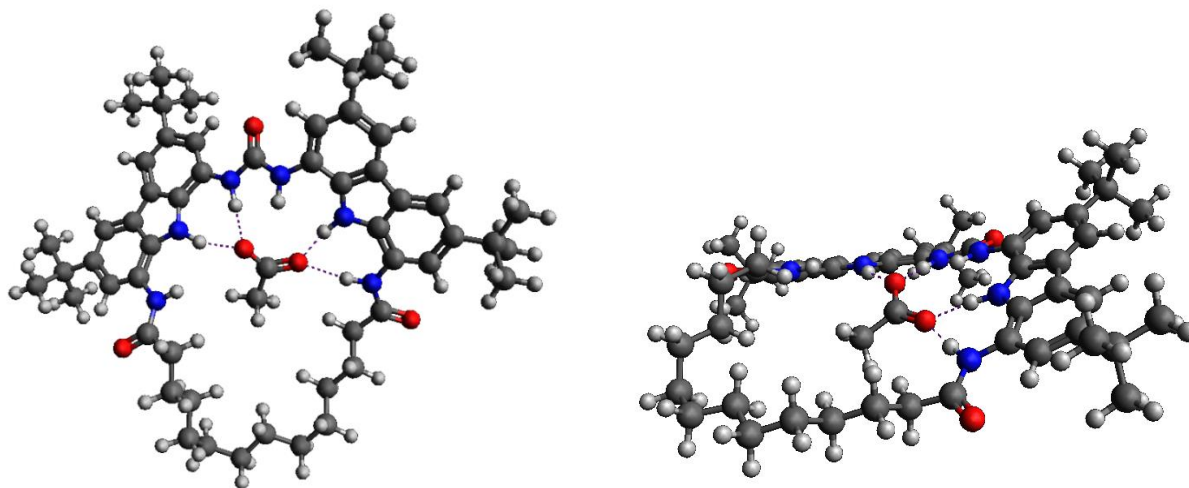

$G = -1835225.73860$  kcal/mol

Lowest energy conformation of receptor **MC012** with benzoate anion

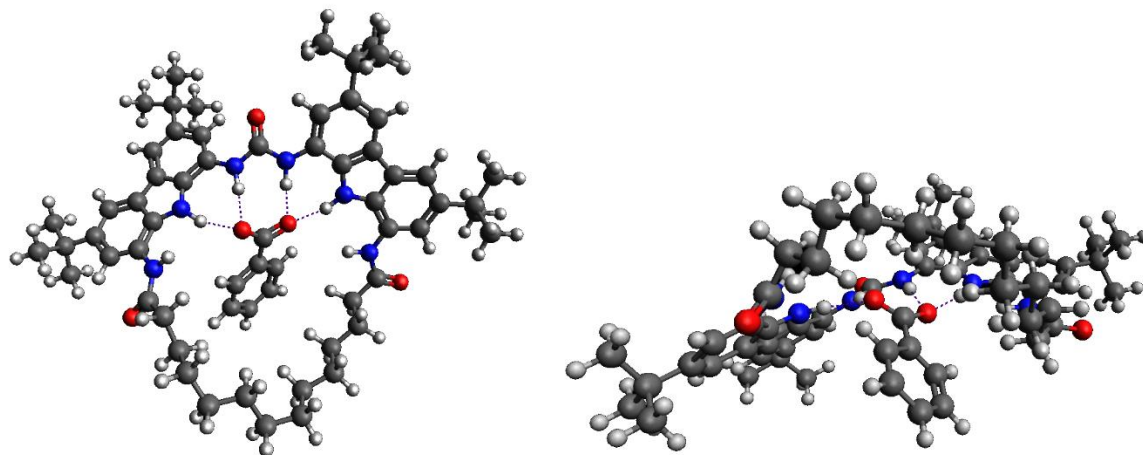

$G = -1955585.03038$  kcal/mol

Lowest energy conformation of receptor **MC012** with lactate anion

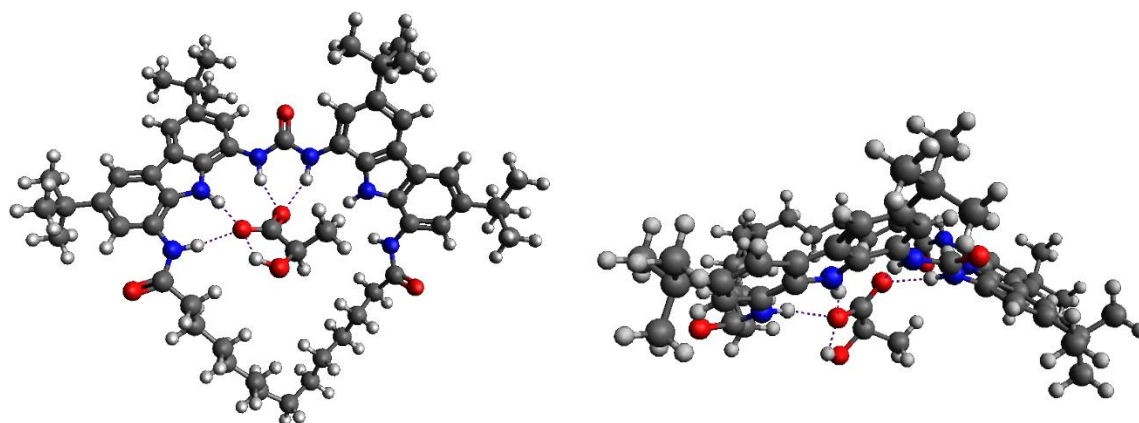

$G = -1907129.15110$  kcal/mol

Lowest energy conformation of receptor **MC012** with formate anion

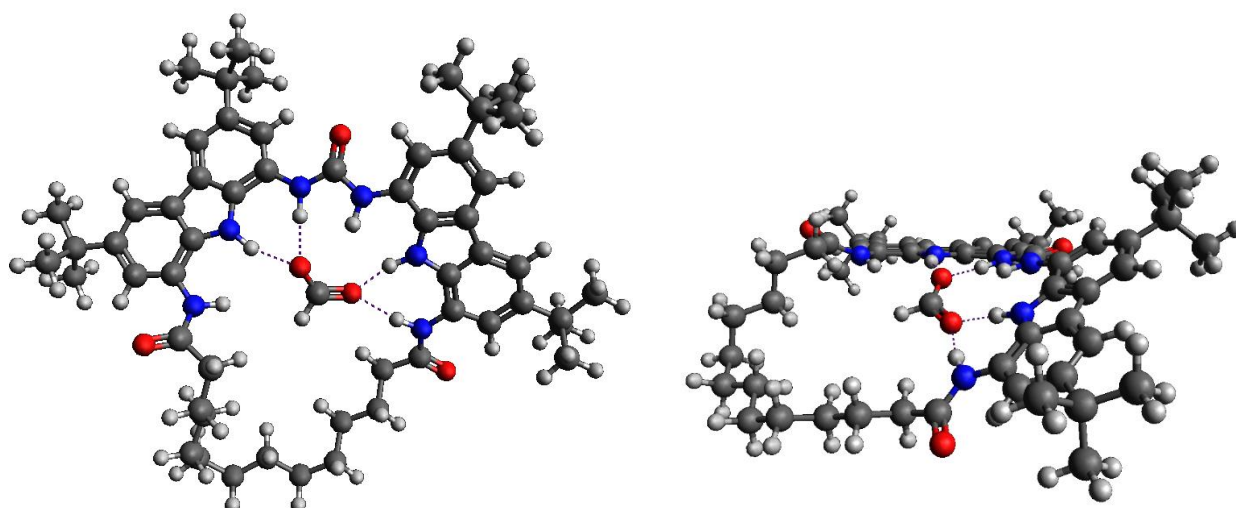

$G = -1810543.68556$  kcal/mol

Lowest energy conformation of receptor **MC013**

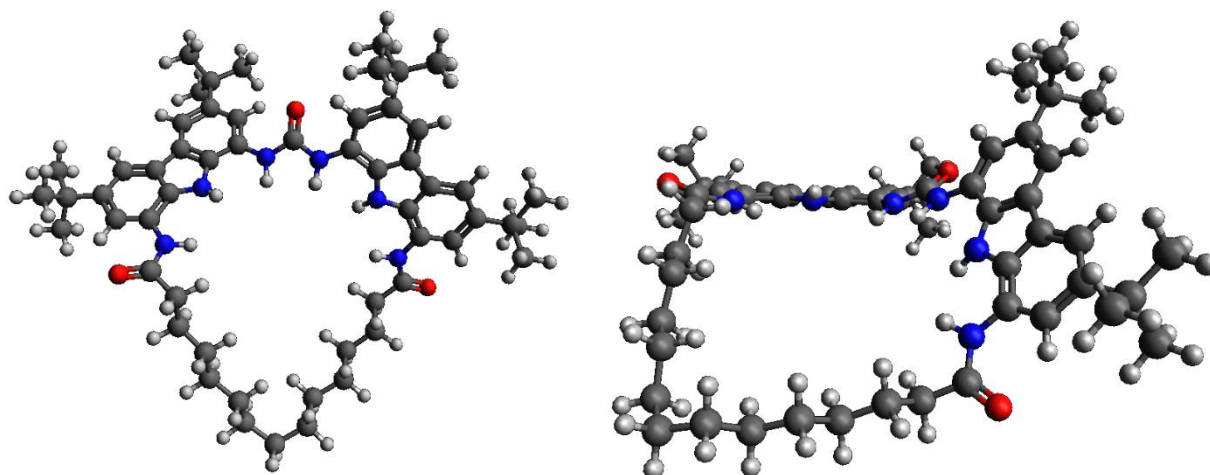

$G = -1716352.25505$  kcal/mol

Lowest energy conformation of receptor **MC013** with pivalate anion

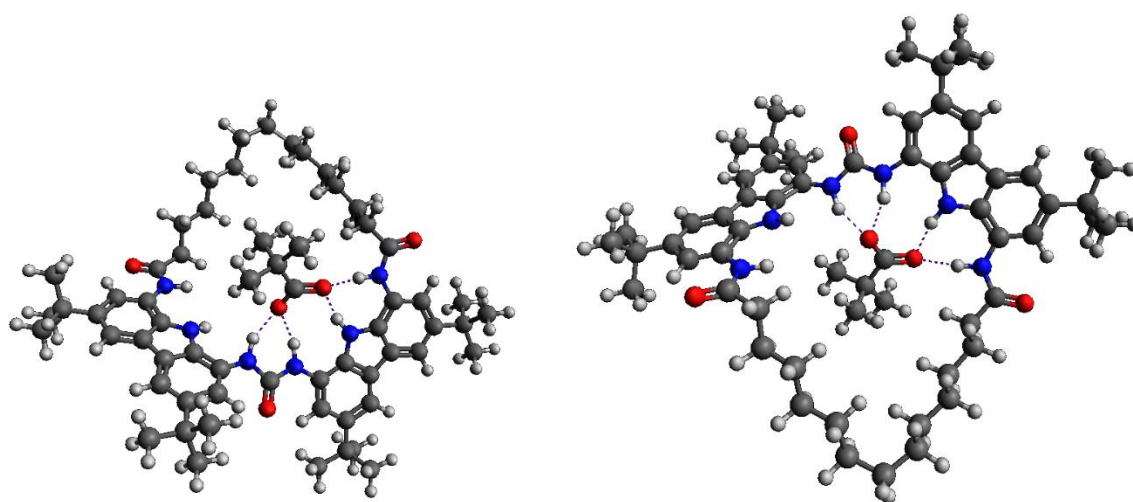

$G = -1933934.70969$  kcal/mol

Lowest energy conformation of receptor **MC013** with acetate anion

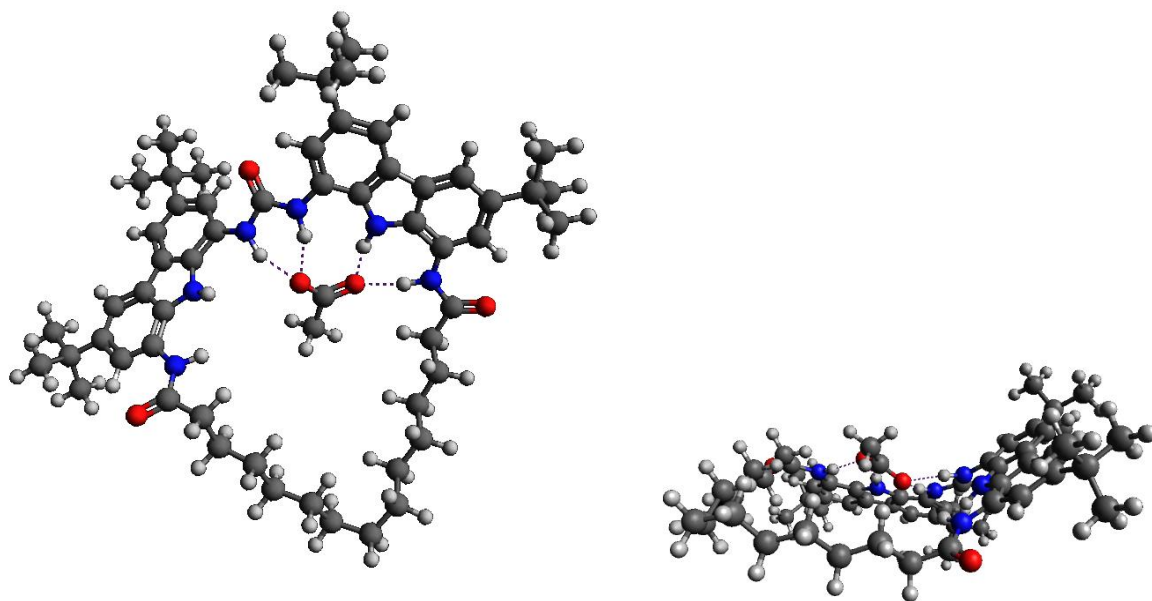

$G = -1859903.77757$  kcal/mol

Lowest energy conformation of receptor **MC013** with benzoate anion

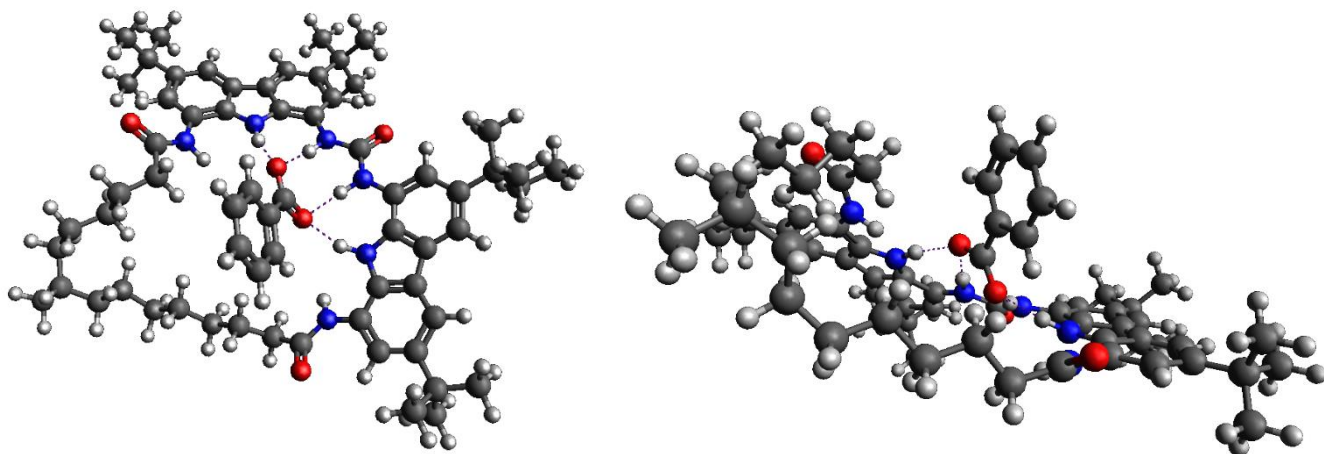

$G = -1980264.91917$  kcal/mol



Lowest energy conformation of receptor **MC013** with lactate anion

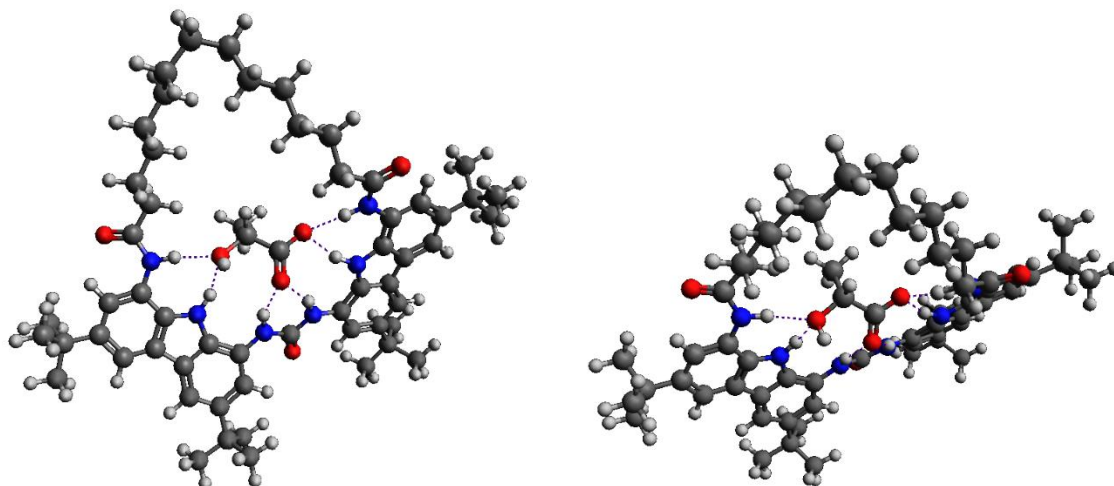

$G = -1931811.69804$  kcal/mol

Lowest energy conformation of receptor **MC013** with formate anion

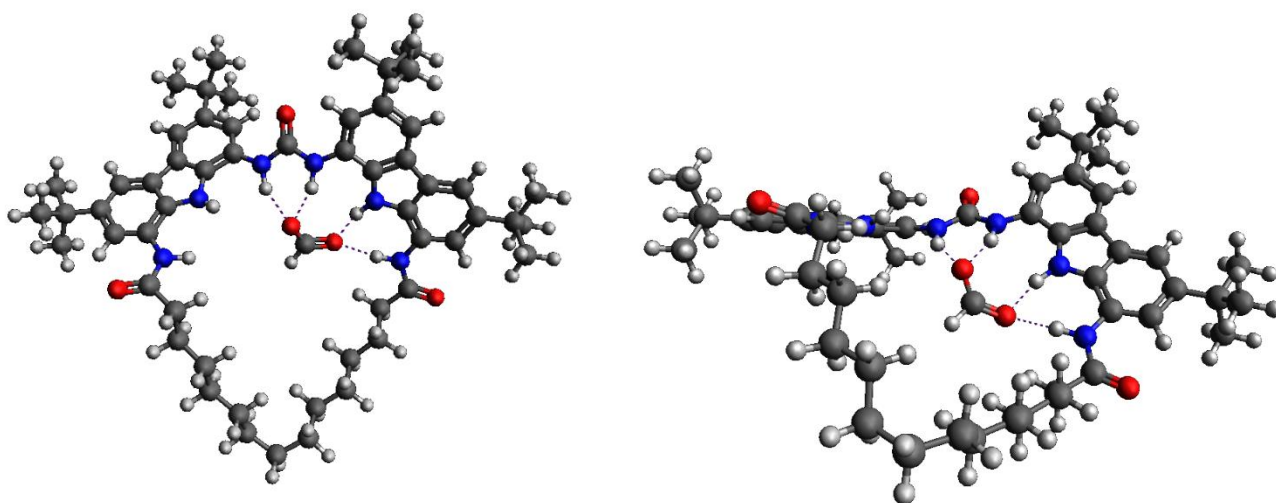

$G = -1835222.20163$  kcal/mol

Lowest energy conformation of receptor **MC014**

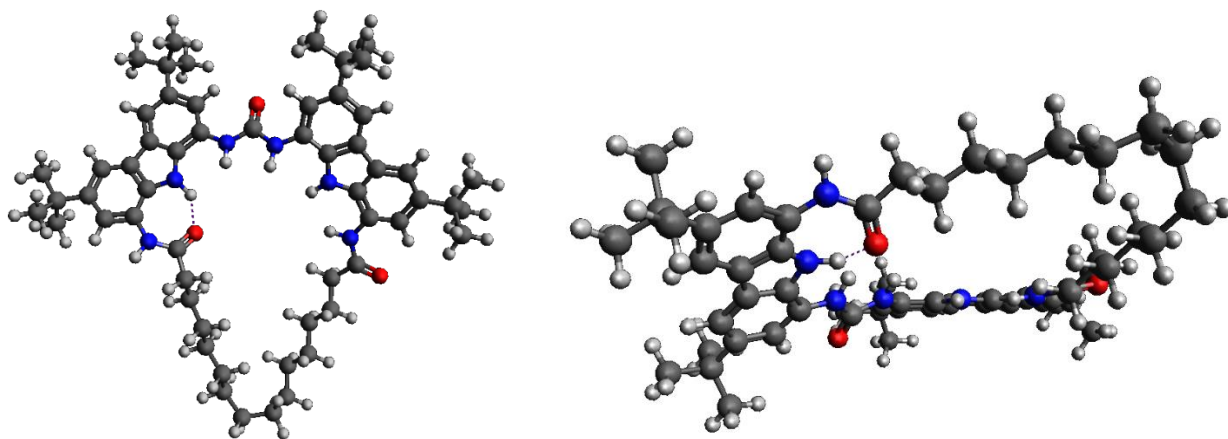

$G = -1741028.91954$  kcal/mol

Lowest energy conformation of receptor **MC014** with pivalate anion

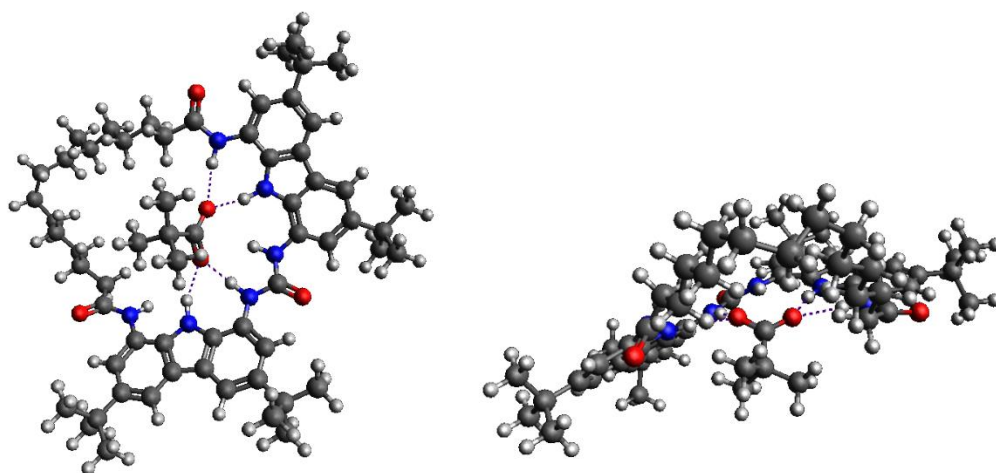

$G = -1958610.17256$  kcal/mol

Lowest energy conformation of receptor **MC014** with acetate anion

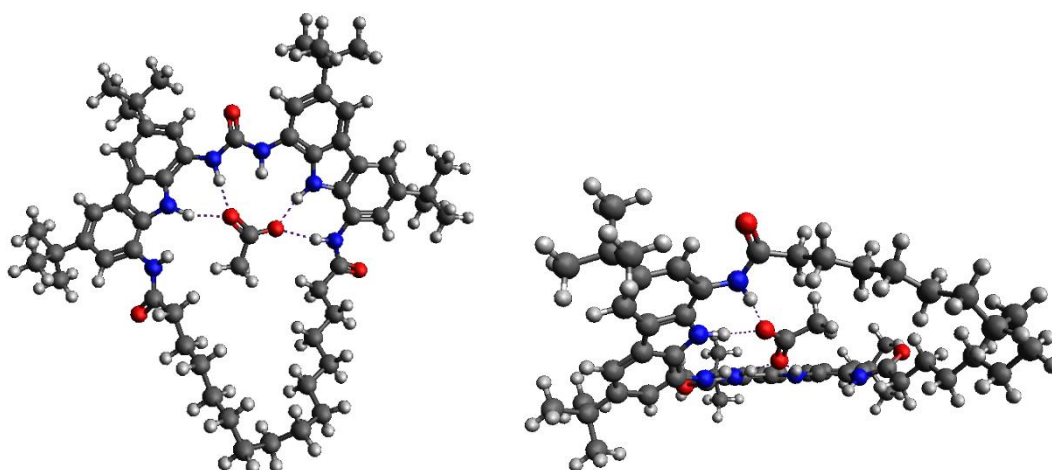

$G = -1884581.51422$  kcal/mol

Lowest energy conformation of receptor **MC014** with benzoate anion

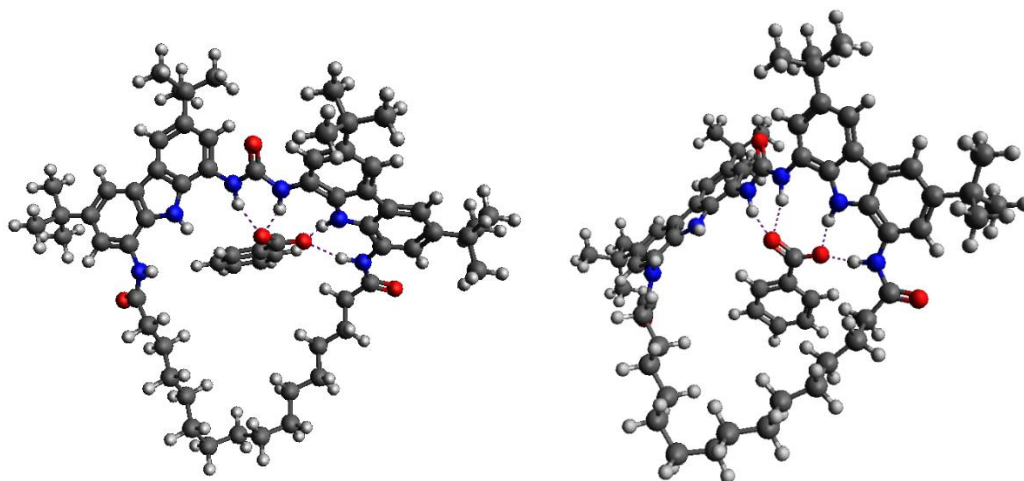

$G = -2004943.68243$  kcal/mol

Lowest energy conformation of receptor **MC014** with lactate anion

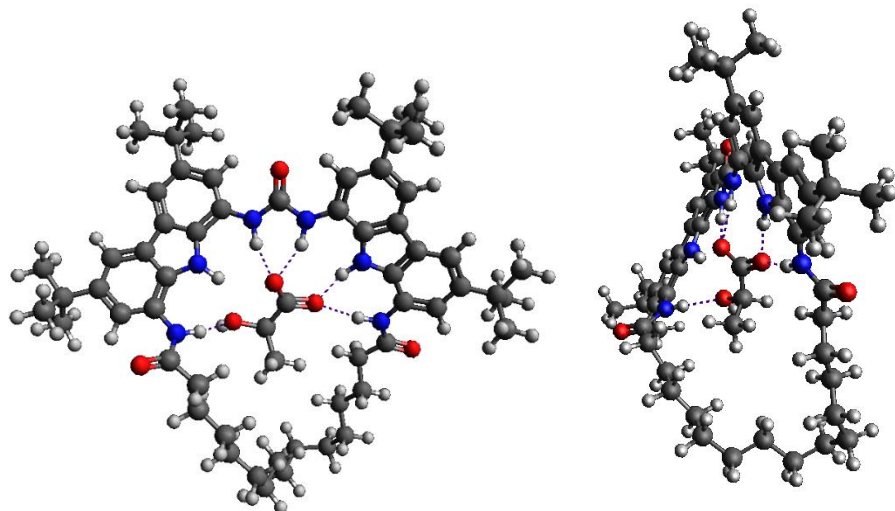

$G = -1956485.72757$  kcal/mol

Lowest energy conformation of receptor **MC014** with formate anion

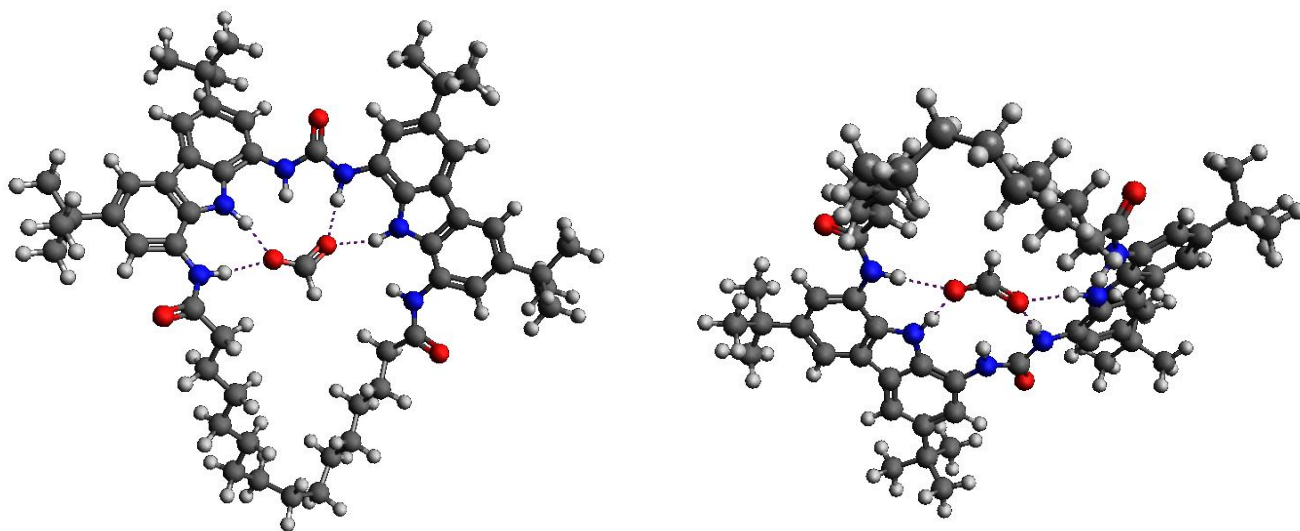

$G = -1859899.50598$  kcal/mol
